# Supplementary material for: Association of the Gut Microbiota With Cognitive Function in Midlife
Source: PubMed Central journal article supplement (PMC8826173; doi:10.1001/jamanetworkopen.2021.43941), 2022-02-08
Supplement: jamanetwopen-e2143941-s001.pdf [file jamanetwopen-e2143941-s001.pdf]

## Supplemental Online Content

Meyer K, Lulla A, Debroy K, et al. Association of the gut microbiota and cognitive function in midlife. *JAMA Netw Open*. 2022;5(2):e2143941. doi:10.1001/jamanetworkopen.2021.43941

**eTable 1.** CARDIA Participant Characteristics for Individuals Who Completed Cognitive Assessments at Year 30 (2015-16), According to Enrollment in the Microbiome Study

**eTable 2.** Descriptive Statistics for the Seven Cognitive Function Measures

**eTable 3.** Correlation Coefficients for the Seven Cognitive Function Measures

**eTable 4.** Descriptive Statistics for Genera

**eTable 5.** Means (SDs) of Seven Cognitive Function Measures According to Quartiles of the First Two PCoA Axes (MDS1 and MDS2)

**eTable 6.** Correlations Between Each of the First Two Axes of the PCoA (MDS1 and MDS2) With Genera Used in the Analysis

**eTable 7.** Multivariable-adjusted Associations Between Gut Microbial Alpha and Beta Diversity and Cognition Measures in CARDIA

**eTable 8.** PERMANOVA Tests (*P* Values) for Interaction Between Beta-diversity (PCoA) and Sex (Panel A) and Race (Panel B)

**eTable 9.** PERMANOVA test (*P* Values) for Sex- (panel A & B) and Race- (panel C & D) Stratified Results

**eTable 10.** *P* values for Interaction Between Sex (Panel A) and Race (Panel B) With Alpha Diversity Measures (Shannon and Richness)

**eTable 11.** Beta-coefficients (95% CI) and *P* Values for Alpha-diversity Measures (Shannon and Richness) Within Strata of Sex (Panel A) and Race (Panel B)

**eTable 12.** Multivariable-adjusted Regression Coefficients, *P* Values, Race Interaction *P* Values, False Discovery Rate (FDR)-adjusted *P* Values for Genera With Respect to DSST

© 2022 Meyer K et al. *JAMA Network Open*.

**eTable 13.** Multivariable-adjusted Regression Coefficients, *P* Values, Race Interaction *P* Values, False Discovery Rate (FDR)-adjusted *P* Values for Genera With Respect to Stroop

**eTable 14.** Multivariable-adjusted Regression Coefficients, *P* Values, Race Interaction *P* Values, False Discovery Rate (FDR)-adjusted *P* Values for Genera With Respect to RAVLT

**eTable 15.** Multivariable-adjusted Regression Coefficients, *P* Values, Race Interaction *P* Values, False Discovery Rate (FDR)-adjusted *P* Values for Genera With Respect to Category Fluency

**eTable 16.** Multivariable-adjusted Regression Coefficients, *P* Values, Race Interaction *P* Values, False Discovery Rate (FDR)-adjusted *P* Values for Genera With Respect to Letter Fluency

**eTable 17.** Multivariable-adjusted Regression Coefficients, *P* Values, Race Interaction *P* Values, False Discovery Rate (FDR)-adjusted *P* Values for Genera With Respect to MOCA

**eTable 18.** Multivariable-adjusted Regression Coefficients, *P* Values, Race Interaction *P* Values, False Discovery Rate (FDR)-adjusted *P* Values for Genera With Respect to DSST

**eTable 19.** Multivariable-adjusted Regression Coefficients, *P* Values, Race Interaction *P* Values, False Discovery Rate (FDR)-adjusted *P* Values for Race-Genera Interactions With Respect to DSST

**eTable 20.** Multivariable-adjusted Regression Coefficients, *P* Values, Race Interaction *P* Values, False Discovery Rate (FDR)-adjusted *P* Values for Race-Genera Interactions With Respect to Stroop

**eTable 21.** Multivariable-adjusted Regression Coefficients, *P* Values, Race Interaction *P* Values, False Discovery Rate (FDR)-adjusted *P* Values for Race-Genera Interactions With Respect to RAVLT

**eTable 22.** Multivariable-adjusted Regression Coefficients, *P* Values, Race Interaction *P* Values, False Discovery Rate (FDR)-adjusted *P* Values for Race-Genera Interactions With Respect to Category Fluency

**eTable 23.** Multivariable-adjusted Regression Coefficients, *P* Values, Race Interaction *P* Values, False Discovery Rate (FDR)-adjusted *P* Values for Race-Genera Interactions With Respect to Letter Fluency

**eTable 24.** Multivariable-adjusted Regression Coefficients, *P* Values, Race Interaction *P* Values, False Discovery Rate (FDR)-adjusted *P* Values for Race-Genera Interactions With Respect to MOCA

**eTable 25.** Multivariable-adjusted Regression Coefficients, *P* Values, Race Interaction *P* Values, False Discovery Rate (FDR)-adjusted *P* Values for Race-Genera Interactions With Respect to PC (1st)

**eTable 26.** Multivariable-adjusted Regression Coefficients, *P* Values, and False Discovery Rate (FDR)-adjusted *P* Values for Genera Among Black Participants With Respect to DSST

**eTable 27.** Multivariable-adjusted Regression Coefficients, *P* Values, and False Discovery Rate (FDR)-adjusted *P* Values for Genera Among Black Participants With Respect to Stroop

**eTable 28.** Multivariable-adjusted Regression Coefficients, *P* Values, and False Discovery Rate (FDR)-adjusted *P* Values for Genera Among Black Participants With Respect to RAVLT

**eTable 29.** Multivariable-adjusted Regression Coefficients, *P* Values, and False Discovery Rate (FDR)-adjusted *P* Values for Genera Among Black Participants With Respect To Category Fluency

**eTable 30.** Multivariable-adjusted Regression Coefficients, *P* Values, and False Discovery Rate (FDR)-adjusted *P* Values for Genera Among Black Participants With Respect to Letter Fluency

**eTable 31.** Multivariable-adjusted Regression Coefficients, *P* Values, and False Discovery Rate (FDR)-adjusted *P* Values for Genera Among Black Participants With Respect to MOCA

**eTable 32.** Multivariable-adjusted Regression Coefficients, *P* Values, and False Discovery Rate (FDR)-adjusted *P* Values for Genera Among Black Participants With Respect to PC (1<sup>st</sup>)

**eTable 33.** Multivariable-adjusted Regression Coefficients, *P* Values, and False Discovery Rate (FDR)-adjusted *P* Values for Genera Among White Participants With Respect to DSST

**eTable 34.** Multivariable-adjusted Regression Coefficients, *P* Values, and False Discovery Rate (FDR)-adjusted *P* Values for Genera Among White Participants With Respect to Stroop

**eTable 35.** Multivariable-adjusted Regression Coefficients, *P* Values, and False Discovery Rate (FDR)-adjusted *P* Values for Genera Among White Participants With Respect to RAVLT

**eTable 36.** Multivariable-adjusted Regression Coefficients, *P* Values, and False Discovery Rate (FDR)-adjusted *P* Values for Genera Among White Participants With Respect To Category Fluency

**eTable 37.** Multivariable-adjusted Regression Coefficients, *P* Values, and False Discovery Rate (FDR)-adjusted *P* Values for Genera Among White Participants With Respect to Letter Fluency

**eTable 38.** Multivariable-adjusted Regression Coefficients, *P* Values, and False Discovery Rate (FDR)-adjusted *P* Values for Genera Among White Participants With Respect to MOCA

**eTable 39.** Multivariable-adjusted Regression Coefficients, *P* Values, and False Discovery Rate (FDR)-adjusted *P* Values for Genera Among White Participants With Respect to PC (1<sup>st</sup>)

**eTable 40.** Multivariable-adjusted Regression Coefficients, *P* Values, Sex Interaction *P* Values, False Discovery Rate (FDR)-adjusted *P* Values for Sex-Genera Interactions With Respect to DSST

**eTable 41.** Multivariable-adjusted Regression Coefficients, *P* Values, Sex Interaction *P* Values, False Discovery Rate (FDR)-adjusted *P* Values for Sex-Genera Interactions With Respect to Stroop

**eTable 42.** Multivariable-adjusted Regression Coefficients, *P* Values, Sex Interaction *P* Values, False Discovery Rate (FDR)-adjusted *P* Values for Sex-Genera Interactions With Respect to RAVLT

**eTable 43.** Multivariable-adjusted Regression Coefficients, *P* Values, Sex Interaction *P* Values, False Discovery Rate (FDR)-adjusted *P* Values for Sex-Genera Interactions With Respect to Category Fluency

**eTable 44.** Multivariable-adjusted Regression Coefficients, *P* Values, Sex Interaction *P* Values, False Discovery Rate (FDR)-adjusted *P* Values for Sex-Genera Interactions With Respect to Letter Fluency

**eTable 45.** Multivariable-adjusted Regression Coefficients, *P* Values, Sex Interaction *P* Values, False Discovery Rate (FDR)-adjusted *P* Values for Sex-Genera Interactions With Respect to MOCA

**eTable 46.** Multivariable-adjusted Regression Coefficients, *P* Values, Sex Interaction *P* Values, False Discovery Rate (FDR)-adjusted *P* Values for Sex-Genera Interactions With Respect to PC (1<sup>st</sup>)

**eTable 47.** Multivariable-adjusted Regression Coefficients, *P* Values, and False Discovery Rate (FDR)-adjusted *P* Values for Genera Among Male Participants With Respect to DSST

**eTable 48.** Multivariable-adjusted Regression Coefficients, *P* Values, and False Discovery Rate (FDR)-adjusted *P* Values for Genera Among Male Participants With Respect to Stroop

**eTable 49.** Multivariable-adjusted Regression Coefficients, *P* Values, and False Discovery Rate (FDR)-adjusted *P* Values for Genera Among Male Participants With Respect to RAVLT

**eTable 50.** Multivariable-adjusted Regression Coefficients, *P* Values, and False Discovery Rate (FDR)-adjusted *P* Values for Genera Among Male Participants With Respect to Category Fluency

**eTable 51.** Multivariable-adjusted Regression Coefficients, *P* Values, and False Discovery Rate (FDR)-adjusted *P* Values for Genera Among Male Participants With Respect to Letter Fluency

**eTable 52.** Multivariable-adjusted Regression Coefficients, *P* Values, and False Discovery Rate (FDR)-adjusted *P* Values for Genera Among Male Participants With Respect to MOCA

**eTable 53.** Multivariable-adjusted Regression Coefficients, *P* Values, and False Discovery Rate (FDR)-adjusted *P* Values for Genera Among Male Participants With Respect to PC (1<sup>st</sup>)

**eTable 54.** Multivariable-adjusted Regression Coefficients, *P* Values, and False Discovery Rate (FDR)-adjusted *P* Values for Genera Among Female Participants With Respect to DSST

**eTable 55.** Multivariable-adjusted Regression Coefficients, *P* Values, and False Discovery Rate (FDR)-adjusted *P* Values for Genera Among Female Participants With Respect to Stroop

**eTable 56.** Multivariable-adjusted Regression Coefficients, *P* Values, and False Discovery Rate (FDR)-adjusted *P* Values for Genera Among Female Participants With Respect to RAVLT

**eTable 57.** Multivariable-adjusted Regression Coefficients, *P* Values, and False Discovery Rate (FDR)-adjusted *P* Values for Genera Among Female Participants With Respect to Category Fluency

**eTable 58.** Multivariable-adjusted Regression Coefficients, *P* Values, and False Discovery Rate (FDR)-adjusted *P* Values for Genera Among Female Participants With Respect to Letter Fluency

**eTable 59.** Multivariable-adjusted Regression Coefficients, *P* Values, and False Discovery Rate (FDR)-adjusted *P* Values for Genera Among Female Participants With Respect to MOCA

**eTable 60.** Multivariable-adjusted Regression Coefficients, *P* Values, and False Discovery Rate (FDR)-adjusted *P* Values for Genera Among Female Participants With Respect to PC (1<sup>st</sup>)

**eTable 61.** Descriptive Statistics for Phyla

**eTable 62.** Multivariable-adjusted Regression Coefficients, *P* Values, and False Discovery Rate (FDR)-adjusted *P* Values for Phyla With Respect to DSST

**eTable 63.** Multivariable-adjusted Regression Coefficients, *P* Values, and False Discovery Rate (FDR)-adjusted *P* Values for Phyla With Respect to Stroop

**eTable 64.** Multivariable-adjusted Regression Coefficients, *P* Values, and False Discovery Rate (FDR)-adjusted *P* Values for Phyla With Respect to RAVLT

**eTable 65.** Multivariable-adjusted Regression Coefficients, *P* Values, and False Discovery Rate (FDR)-adjusted *P* Values for Phyla With Respect to Category Fluency

**eTable 66.** Multivariable-adjusted Regression Coefficients, *P* Values, and False Discovery Rate (FDR)-adjusted *P* Values for Phyla With Respect to Letter Fluency

**eTable 67.** Multivariable-adjusted Regression Coefficients, *P* Values, and False Discovery Rate (FDR)-adjusted *P* Values for Phyla With Respect to MOCA

**eTable 68.** Multivariable-adjusted Regression Coefficients, *P* Values, and False Discovery Rate (FDR)-adjusted *P* Values for Phyla With Respect to PC (1<sup>st</sup>)

**eTable 69.** Coefficients and *P* Values for Associations Between Bacteroidota:Firmicutes Ratio With Measures of Cognitive Function

**eFigure.** Beta-diversity (PCoA) Differences for Each Cognitive Function Assessment

This supplemental material has been provided by the authors to give readers additional information about their work.

eTable 1: CARDIA participant characteristics for individuals who completed cognitive assessments at Year 30 (2015-16), according to enrollment in the microbiome study

| Characteristic                  | Microbiome Study | Yr 30       | p-value <sup>3</sup> |
|---------------------------------|------------------|-------------|----------------------|
| Sample Size <sup>1</sup> , n    | 597              | 2,550       |                      |
| Age, years                      | 55.2 (3.5)       | 55.1 (3.6)  | 0.42                 |
| Males, %                        | 44.7             | 42.6        | 0.33                 |
| Black Americans, %              | 45.2             | 48.2        | 0.19                 |
| Educational Attainment, years   | 15.9 (2.6)       | 15.7 (2.6)  | 0.14                 |
| Field Center, %                 |                  |             |                      |
| Birmingham, AL                  | 16.1             | 24.4        | <0.0001              |
| Chicago, IL                     | 48.9             | 15.3        |                      |
| Minneapolis, MN                 | 18.1             | 27          |                      |
| Oakland, CA                     | 16.9             | 33.4        |                      |
| MoCA                            | 24.4 (3.6)       | 23.6 (4.0)  | <0.0001              |
| DSST, no. correctly substituted | 69.2 (16.9)      | 67.0 (17.0) | 0.0068               |
| Stroop, no. correctly assigned  | 22.2 (11.5)      | 23.2 (11.7) | 0.023                |

|                                               |               |               |        |
|-----------------------------------------------|---------------|---------------|--------|
| RAVLT, no. of words recalled                  | 9.3 (1.9)     | 9.0 (2.0)     | 0.0044 |
| Category fluency, no. of unique animals       | 20.6 (5.2)    | 20.2 (5.6)    | 0.2    |
| Letter fluency, no. unique words              | 42.6 (12.3)   | 41.3 (13.2)   | 0.018  |
| Current Smoking, %                            | 13.1          | 14.2          | 0.62   |
| Physical activity, intensity units, med (IQR) | 269 (127-504) | 252 (116-456) | 0.18   |
| BMI, kg/m <sup>2</sup>                        | 29.4 (6.2)    | 30.8 (7.4)    | 0.0002 |
| Hypertension, %                               | 35            | 40            | 0.026  |
| Diabetes, %                                   | 15.4          | 17.9          | 0.13   |

Sample size represents the number of participants for whom a microbiome sample and at least 1 cognitive assessment is present. Mean (SD) unless noted. Differences in categorical variables assessed with chi-square and continuous variables with a non-parametric test for comparing means (or medians for physical activity).

eTable 2: Descriptive statistics for the seven cognitive function measures

| Variable         | Min.  | 25th % | Median | 75th % | Max. | Mean    | SD    | Missing, n |
|------------------|-------|--------|--------|--------|------|---------|-------|------------|
| DSST             | 17    | 58     | 70     | 82     | 112  | 69.17   | 16.87 | 10         |
| Stroop           | 0     | 15     | 20     | 27     | 107  | 22.24   | 11.54 | 18         |
| RAVLT            | 2.8   | 8      | 9.4    | 10.6   | 14   | 9.3     | 1.94  | 10         |
| Category fluency | 6     | 17     | 20     | 24     | 41   | 20.56   | 5.22  | 10         |
| Letter fluency   | 7     | 34     | 42     | 50     | 86   | 42.63   | 12.27 | 16         |
| MOCA             | 8     | 22     | 25     | 27     | 30   | 24.38   | 3.64  | 11         |
| PC (1st)         | -5.52 | -1.21  | 0.082  | 1.21   | 4.24 | -0.0021 | 1.8   | 10         |



eTable 3: Correlation coefficients for the seven cognitive function measures

|                         | <b>DSST</b> | <b>Stroop</b> | <b>RAVLT</b> | <b>Category fluency</b> | <b>Letter fluency</b> | <b>MOCA</b> | <b>PC (1st)</b> |
|-------------------------|-------------|---------------|--------------|-------------------------|-----------------------|-------------|-----------------|
| <b>DSST</b>             | 1           | -0.47         | 0.53         | 0.38                    | 0.41                  | 0.53        | 0.74            |
| <b>Stroop</b>           |             | 1             | -0.42        | -0.36                   | -0.37                 | -0.47       | -0.66           |
| <b>RAVLT</b>            |             |               | 1            | 0.44                    | 0.44                  | 0.64        | 0.79            |
| <b>Category fluency</b> |             |               |              | 1                       | 0.52                  | 0.49        | 0.71            |
| <b>Letter fluency</b>   |             |               |              |                         | 1                     | 0.48        | 0.72            |
| <b>MOCA</b>             |             |               |              |                         |                       | 1           | 0.81            |
| <b>PC (1st)</b>         |             |               |              |                         |                       |             | 1               |

eTable 4: Descriptive statistics for genera

| Genus                                | Min.  | 25th %   | Median   | 75th %   | Max.      | Mean     | SD       | Missing, n |
|--------------------------------------|-------|----------|----------|----------|-----------|----------|----------|------------|
| Acetanaerobacterium                  | 0.00  | 0.00     | 0.00     | 4.00     | 54.00     | 3.57     | 7.12     | 377        |
| Acidaminococcus                      | 0.00  | 0.00     | 0.00     | 245.50   | 34487.00  | 1126.60  | 3215.34  | 352        |
| Actinomyces                          | 0.00  | 0.00     | 0.00     | 8.00     | 131.00    | 6.96     | 13.70    | 312        |
| Adlercreutzia                        | 0.00  | 0.00     | 29.00    | 91.50    | 1308.00   | 81.61    | 141.96   | 173        |
| Agathobacter                         | 0.00  | 1496.00  | 3420.00  | 6653.00  | 42267.00  | 4974.00  | 5153.25  | 10         |
| Akkermansia                          | 0.00  | 0.00     | 39.00    | 890.50   | 23786.00  | 1082.70  | 2570.36  | 177        |
| Alistipes                            | 0.00  | 1154.00  | 2648.00  | 5553.00  | 41105.00  | 4106.00  | 4570.00  | 15         |
| Allisonella                          | 0.00  | 0.00     | 0.00     | 3.00     | 607.00    | 19.30    | 59.70    | 451        |
| Anaerofilum                          | 0.00  | 0.00     | 4.00     | 13.00    | 290.00    | 12.08    | 26.61    | 238        |
| Anaerostipes                         | 0.00  | 109.50   | 262.00   | 466.50   | 7313.00   | 394.30   | 571.70   | 15         |
| Anaerotruncus                        | 0.00  | 6.00     | 17.00    | 46.00    | 1977.00   | 59.48    | 156.50   | 86         |
| Bacteroides                          | 38.00 | 20482.00 | 33655.00 | 48447.00 | 125950.00 | 35733.00 | 20682.29 | 0          |
| Barnesiella                          | 0.00  | 0.00     | 5.00     | 993.50   | 10763.00  | 857.90   | 1653.97  | 256        |
| Bifidobacterium                      | 0.00  | 66.50    | 792.00   | 1996.50  | 31271.00  | 1718.60  | 3048.20  | 62         |
| Bilophila                            | 0.00  | 5.00     | 133.00   | 352.00   | 2196.00   | 230.90   | 286.50   | 140        |
| Blautia                              | 21.00 | 879.50   | 1325.00  | 2026.00  | 11968.00  | 1676.00  | 1357.75  | 0          |
| Butyrivibrio                         | 0.00  | 84.00    | 158.00   | 321.50   | 2300.00   | 266.50   | 303.55   | 3          |
| Butyrivibrio                         | 0.00  | 0.00     | 288.00   | 770.00   | 4638.00   | 492.00   | 658.64   | 205        |
| Lachnospiraceae_CAG.56               | 0.00  | 0.00     | 24.00    | 142.00   | 3396.00   | 111.30   | 234.98   | 279        |
| Candidatus_Soleaferrea               | 0.00  | 0.00     | 6.00     | 12.00    | 141.00    | 9.59     | 13.24    | 167        |
| Caproiciproducens                    | 0.00  | 0.00     | 6.00     | 16.00    | 351.00    | 14.32    | 29.21    | 242        |
| Christensenellaceae_R.7_group        | 0.00  | 8.00     | 324.00   | 1354.00  | 17455.00  | 1282.00  | 2451.28  | 109        |
| Clostridium_sensu_stricto_1          | 0.00  | 0.00     | 6.00     | 62.50    | 8329.00   | 166.10   | 648.53   | 244        |
| Colidextribacter                     | 0.00  | 37.00    | 162.00   | 312.00   | 3774.00   | 267.30   | 367.58   | 16         |
| Collinsella                          | 0.00  | 145.50   | 785.00   | 1872.00  | 23889.00  | 1471.00  | 2154.67  | 74         |
| Coprobacter                          | 0.00  | 0.00     | 0.00     | 34.50    | 4093.00   | 112.60   | 355.08   | 411        |
| Coprococcus                          | 0.00  | 308.00   | 376.00   | 1750.00  | 3040.00   | 1303.00  | 1372.64  | 55         |
| Defluviitaleaceae_UCG.011            | 0.00  | 0.00     | 4.00     | 18.00    | 211.00    | 15.09    | 27.80    | 257        |
| Desulfovibrio                        | 0.00  | 0.00     | 0.00     | 124.00   | 2978.00   | 190.90   | 432.29   | 338        |
| Dialister                            | 0.00  | 0.00     | 5.00     | 1033.00  | 12181.00  | 787.90   | 1547.59  | 260        |
| Eggerthellaceae_DNF00809             | 0.00  | 0.00     | 0.00     | 8.00     | 284.00    | 8.23     | 25.39    | 417        |
| Dorea                                | 0.00  | 277.50   | 616.00   | 1166.50  | 6138.00   | 896.50   | 941.49   | 31         |
| Ruminococcaceae_DTU089               | 0.00  | 3.00     | 17.00    | 50.00    | 500.00    | 44.57    | 74.59    | 140        |
| Eggerthella                          | 0.00  | 0.00     | 13.00    | 37.00    | 1324.00   | 44.71    | 115.18   | 214        |
| Eisenbergiella                       | 0.00  | 0.00     | 0.00     | 34.00    | 2094.00   | 38.29    | 155.28   | 340        |
| Erysipelatoclostridium               | 0.00  | 0.00     | 9.00     | 46.50    | 1298.00   | 37.95    | 85.06    | 217        |
| Erysipelotrichaceae_UCG.003          | 0.00  | 0.00     | 35.00    | 138.50   | 1585.00   | 104.00   | 167.61   | 215        |
| Escherichia_Shigella                 | 0.00  | 3.50     | 43.00    | 379.00   | 24295.00  | 619.20   | 1981.18  | 142        |
| Faecalibacterium                     | 0.00  | 4523.00  | 7736.00  | 11174.00 | 88698.00  | 8272.00  | 5528.14  | 8          |
| Anaerovoracaceae_Family_XIII_AD3011  | 0.00  | 5.00     | 26.00    | 76.00    | 1649.00   | 66.17    | 140.71   | 128        |
| Anaerovoracaceae_Family_XIII_UCG.001 | 0.00  | 0.00     | 8.00     | 22.00    | 179.00    | 16.41    | 24.09    | 223        |
| Lachnospiraceae_FD2005               | 0.00  | 0.00     | 0.00     | 5.00     | 538.00    | 13.66    | 48.09    | 446        |
| Flavonifractor                       | 0.00  | 20.00    | 71.00    | 181.50   | 6012.00   | 193.00   | 466.57   | 91         |
| Fournierella                         | 0.00  | 0.00     | 0.00     | 3.00     | 984.00    | 17.13    | 73.21    | 449        |
| Frisingicoccus                       | 0.00  | 0.00     | 0.00     | 38.00    | 4251.00   | 57.55    | 219.86   | 377        |
| Fusicatenibacter                     | 0.00  | 263.50   | 761.00   | 1641.50  | 10538.00  | 1204.70  | 1445.36  | 58         |
| Fusobacterium                        | 0.00  | 0.00     | 0.00     | 7.50     | 12808.00  | 239.80   | 1032.22  | 405        |
| Lachnospiraceae_GCA.900066575        | 0.00  | 0.00     | 23.00    | 46.00    | 576.00    | 34.34    | 46.62    | 154        |
| Gordonibacter                        | 0.00  | 0.00     | 0.00     | 18.00    | 2377.00   | 18.74    | 100.45   | 320        |
| Granulicatella                       | 0.00  | 0.00     | 0.00     | 8.00     | 156.00    | 6.41     | 13.17    | 319        |
| Haemophilus                          | 0.00  | 0.00     | 7.00     | 41.00    | 18435.00  | 130.10   | 815.80   | 244        |
| Harryflintia                         | 0.00  | 0.00     | 0.00     | 14.00    | 192.00    | 9.58     | 18.56    | 339        |
| Holdemanella                         | 0.00  | 0.00     | 0.00     | 40.00    | 1091.00   | 57.36    | 137.28   | 412        |
| Holdemania                           | 0.00  | 0.00     | 0.00     | 4.00     | 41.00     | 2.38     | 4.42     | 391        |
| Hungateella                          | 0.00  | 0.00     | 11.00    | 36.50    | 2844.00   | 46.88    | 177.81   | 265        |
| Hydrogenoanaerobacterium             | 0.00  | 0.00     | 0.00     | 9.00     | 694.00    | 16.69    | 56.61    | 365        |
| Ruminococcaceae_Incertae_Sedis       | 0.00  | 92.50    | 189.00   | 418.00   | 7385.00   | 400.80   | 671.29   | 1          |
| Intestinibacter                      | 0.00  | 0.00     | 4.00     | 74.50    | 1101.00   | 56.18    | 119.32   | 291        |
| Intestinimonas                       | 0.00  | 0.00     | 11.00    | 42.50    | 2260.00   | 58.89    | 161.23   | 235        |
| Lachnoclostridium                    | 29.00 | 709.50   | 1381.00  | 2502.00  | 44118.00  | 2106.00  | 2808.28  | 0          |
| Lachnospira                          | 0.00  | 1049.00  | 2647.00  | 4865.00  | 26458.00  | 3287.00  | 2999.04  | 22         |
| Lachnospiraceae_FCS020_group         | 0.00  | 0.00     | 21.00    | 56.00    | 476.00    | 39.31    | 54.65    | 183        |
| Lachnospiraceae_ND3007_group         | 0.00  | 11.50    | 234.00   | 689.00   | 6609.00   | 559.50   | 869.46   | 141        |
| Lachnospiraceae_NK4A136_group        | 0.00  | 159.00   | 432.00   | 1061.00  | 7337.00   | 803.50   | 1020.25  | 34         |
| Lachnospiraceae_UCG.001              | 0.00  | 0.00     | 0.00     | 86.00    | 2551.00   | 103.70   | 242.01   | 333        |
| Lachnospiraceae_UCG.004              | 0.00  | 73.00    | 277.00   | 632.00   | 8042.00   | 474.70   | 701.26   | 88         |
| Lachnospiraceae_UCG.010              | 0.00  | 28.00    | 78.00    | 218.50   | 2266.00   | 177.80   | 265.65   | 32         |
| Lactobacillus                        | 0.00  | 0.00     | 0.00     | 6.00     | 5999.00   | 90.10    | 496.58   | 369        |
| Lactococcus                          | 0.00  | 0.00     | 0.00     | 8.00     | 242.00    | 9.97     | 25.17    | 332        |
| Marvinbryantia                       | 0.00  | 35.50    | 207.00   | 483.50   | 5196.00   | 375.10   | 570.50   | 110        |
| Megasphaera                          | 0.00  | 0.00     | 0.00     | 9.00     | 27568.00  | 744.80   | 2777.85  | 377        |
| Monoglobus                           | 0.00  | 41.50    | 148.00   | 390.00   | 4614.00   | 317.70   | 503.83   | 54         |
| Moryella                             | 0.00  | 0.00     | 0.00     | 11.00    | 152.00    | 7.93     | 14.80    | 350        |
| Negativibacillus                     | 0.00  | 7.00     | 52.00    | 179.00   | 4235.00   | 162.90   | 313.92   | 136        |
| Oscillospiraceae_NK4A214_group       | 0.00  | 0.00     | 181.00   | 717.50   | 10429.00  | 570.20   | 995.69   | 154        |
| Odoribacter                          | 0.00  | 7.00     | 527.00   | 1139.00  | 22999.00  | 930.20   | 1624.81  | 125        |
| Oscillibacter                        | 0.00  | 5.00     | 17.00    | 45.00    | 2155.00   | 59.01    | 169.32   | 142        |
| Oscillospira                         | 0.00  | 66.50    | 117.00   | 253.50   | 4305.00   | 234.00   | 380.56   | 12         |

|                          |      |        |         |         |          |         |          |     |
|--------------------------|------|--------|---------|---------|----------|---------|----------|-----|
| Oxalobacter              | 0.00 | 0.00   | 0.00    | 12.00   | 358.00   | 14.97   | 37.56    | 421 |
| Paludicola               | 0.00 | 0.00   | 7.00    | 27.50   | 3336.00  | 34.38   | 154.77   | 205 |
| Parabacteroides          | 0.00 | 828.50 | 1985.00 | 3795.00 | 37094.00 | 2838.40 | 3302.62  | 39  |
| Paraprevotella           | 0.00 | 0.00   | 0.00    | 224.00  | 21406.00 | 547.40  | 1770.26  | 361 |
| Parasutterella           | 0.00 | 2.00   | 103.00  | 1292.00 | 13304.00 | 902.90  | 1512.92  | 151 |
| Peptococcus              | 0.00 | 0.00   | 0.00    | 6.50    | 487.00   | 14.83   | 49.27    | 426 |
| Phascolarctobacterium    | 0.00 | 13.00  | 2661.00 | 5914.00 | 36868.00 | 4064.00 | 5104.79  | 54  |
| Phoea                    | 0.00 | 0.00   | 10.00   | 22.00   | 511.00   | 16.20   | 28.70    | 164 |
| Prevotella               | 0.00 | 9.00   | 89.00   | 6458.00 | 32382.00 | 8905.00 | 17702.44 | 89  |
| Romboutsia               | 0.00 | 0.00   | 14.00   | 56.00   | 2272.00  | 70.38   | 178.55   | 211 |
| Roseburia                | 0.00 | 256.00 | 707.00  | 1432.00 | 11084.00 | 1107.00 | 1377.46  | 27  |
| Ruminococcus             | 0.00 | 64.50  | 557.00  | 1682.50 | 17447.00 | 1329.30 | 2087.47  | 79  |
| Sellimonas               | 0.00 | 0.00   | 0.00    | 23.00   | 1526.00  | 28.26   | 91.82    | 382 |
| Senegalimassilia         | 0.00 | 0.00   | 0.00    | 14.00   | 1355.00  | 39.32   | 124.04   | 428 |
| Shuttleworthia           | 0.00 | 0.00   | 0.00    | 24.00   | 857.00   | 26.43   | 76.44    | 392 |
| Slackia                  | 0.00 | 0.00   | 0.00    | 59.50   | 1001.00  | 56.57   | 124.19   | 377 |
| Streptococcus            | 0.00 | 33.00  | 34.00   | 279.00  | 8091.00  | 394.40  | 965.16   | 13  |
| Subdoligranulum          | 0.00 | 310.00 | 855.00  | 1625.00 | 11638.00 | 1279.00 | 1484.05  | 35  |
| Sutterella               | 0.00 | 0.00   | 638.00  | 2277.00 | 20418.00 | 1525.00 | 2297.98  | 180 |
| Saccharimonadaceae_TM7x  | 0.00 | 0.00   | 7.00    | 19.00   | 1370.00  | 18.41   | 62.61    | 189 |
| Turicibacter             | 0.00 | 0.00   | 0.00    | 3.50    | 1613.00  | 15.44   | 86.01    | 429 |
| Tuzzerella               | 0.00 | 0.00   | 0.00    | 17.00   | 2915.00  | 66.49   | 224.09   | 396 |
| Ruminococcaceae_UBA1819  | 0.00 | 9.00   | 21.00   | 53.50   | 3350.00  | 74.45   | 221.69   | 61  |
| Oscillospiraceae_UCG.002 | 0.00 | 105.00 | 793.00  | 2174.00 | 15158.00 | 1639.00 | 2277.40  | 100 |
| Oscillospiraceae_UCG.003 | 0.00 | 0.00   | 146.00  | 430.50  | 5113.00  | 341.60  | 576.38   | 155 |
| Oscillospiraceae_UCG.005 | 0.00 | 22.00  | 147.00  | 519.50  | 3152.00  | 487.60  | 900.36   | 81  |
| Butyricocccaceae_UCG.009 | 0.00 | 0.00   | 0.00    | 11.00   | 1702.00  | 13.88   | 74.48    | 360 |
| Veillonella              | 0.00 | 9.00   | 38.00   | 149.50  | 15224.00 | 393.20  | 1398.70  | 72  |
| Victivallis              | 0.00 | 0.00   | 0.00    | 21.00   | 2624.00  | 54.12   | 184.83   | 423 |

eTable 5: Means (SDs) of seven cognitive function measures according to quartiles of the first two PCoA axes (MDS1 and MDS2).

|                         | <b>MDS1_quart1</b> | <b>MDS1_quart2</b> | <b>MDS1_quart3</b> | <b>MDS1_quart4</b> | <b>MDS2_quart1</b> | <b>MDS2_quart2</b> | <b>MDS2_quart3</b> | <b>MDS2_quart4</b> |
|-------------------------|--------------------|--------------------|--------------------|--------------------|--------------------|--------------------|--------------------|--------------------|
| <b>DSST</b>             | 71.26(15.58)       | 69.54(17.26)       | 68.39(18.04)       | 67.53(16.39)       | 63.45(16.18)       | 67.78(16.02)       | 71.17(15.69)       | 74.30(17.74)       |
| <b>MOCA</b>             | 24.71(3.53)        | 24.71(3.42)        | 24.09(3.74)        | 24.02(3.81)        | 23.35(3.89)        | 24.03(3.35)        | 24.64(3.54)        | 25.50(3.42)        |
| <b>RAVLT</b>            | 9.29(2.14)         | 9.52(1.85)         | 9.23(1.98)         | 9.15(1.77)         | 8.59(1.74)         | 9.11(1.92)         | 9.46(1.82)         | 10.04(1.99)        |
| <b>Stroop</b>           | 21.02(9.07)        | 20.92(10.98)       | 23.19(12.25)       | 23.80(13.25)       | 24.65(12.67)       | 23.33(9.81)        | 21.37(12.30)       | 19.62(10.61)       |
| <b>Category fluency</b> | 21.11(5.04)        | 21.34(5.29)        | 20.38(4.93)        | 19.40(5.46)        | 20.03(4.91)        | 20.09(5.30)        | 20.79(5.46)        | 21.32(5.15)        |
| <b>Letter fluency</b>   | 43.59(12.04)       | 43.36(12.62)       | 41.93(12.93)       | 41.63(11.39)       | 40.85(12.25)       | 42.09(12.31)       | 43.22(12.64)       | 44.37(11.68)       |
| <b>PC (1st)</b>         | 0.19(1.78)         | 0.22(1.75)         | -0.14(1.86)        | -0.28(1.75)        | -0.58(1.72)        | -0.25(1.66)        | 0.18(1.82)         | 0.64(1.76)         |

eTable 6: Correlations between each of the first two axes of the PCoA (MDS1 and MDS2) with genera used in the analysis

| Taxa                               | MDS1   | MDS2    |
|------------------------------------|--------|---------|
| Acetanaerobacterium                | 0.086  | 0.29    |
| Acidaminococcus                    | -0.063 | -0.25   |
| Actinomyces                        | 0.063  | -0.13   |
| Adlercreutzia                      | -0.094 | 0.47    |
| Agathobacter                       | -0.088 | -0.14   |
| Akkermansia                        | -0.24  | 0.47    |
| Alistipes                          | -0.18  | 0.56    |
| Allisonella                        | -0.25  | -0.45   |
| Anaerofilum                        | -0.090 | 0.39    |
| Anaerostipes                       | 0.18   | 0.14    |
| Anaerotruncus                      | -0.11  | 0.61    |
| Bacteroides                        | 0.63   | 0.21    |
| Barnesiella                        | -0.44  | 0.085   |
| Bifidobacterium                    | 0.11   | -0.14   |
| Bilophila                          | -0.12  | 0.076   |
| Blautia                            | 0.23   | 0.32    |
| Butyricicoccus                     | -0.15  | 0.23    |
| Butyricimonas                      | -0.25  | -0.096  |
| Lachnospiraceae_CAG.56             | -0.39  | -0.055  |
| Candidatus_Soleaferrea             | 0.094  | 0.38    |
| Caproiciproducens                  | -0.077 | 0.47    |
| Christensenellaceae_R.7_group      | -0.75  | 0.30    |
| Clostridium_sensu_stricto_1        | -0.20  | -0.11   |
| Colidextribacter                   | 0.22   | 0.40    |
| Collinsella                        | -0.24  | -0.21   |
| Coprobacter                        | -0.26  | 0.010   |
| Coprococcus                        | -0.35  | -0.083  |
| Defluviitaleaceae_UCG.011          | -0.38  | 0.49    |
| Desulfovibrio                      | -0.49  | -0.11   |
| Dialister                          | 0.070  | 0.088   |
| Eggerthellaceae_DNF00809           | -0.27  | 0.38    |
| Dorea                              | -0.32  | -0.15   |
| Ruminococcaceae_DTU089             | -0.14  | 0.60    |
| Eggerthella                        | 0.60   | 0.40    |
| Eisenbergiella                     | 0.45   | 0.27    |
| Erysipelatoclostridium             | 0.53   | 0.21    |
| Erysipelotrichaceae_UCG.003        | -0.19  | 0.18    |
| Escherichia.Shigella               | 0.30   | -0.067  |
| Faecalibacterium                   | -0.055 | -0.0088 |
| Anaerovoracaceae_Family_XIII_AD301 | -0.58  | 0.49    |
| Anaerovoracaceae_Family_XIII_UCG.0 | -0.54  | 0.27    |
| Lachnospiraceae_FD2005             | -0.28  | -0.079  |

|                |      |      |
|----------------|------|------|
| Flavonifractor | 0.67 | 0.30 |
|----------------|------|------|

|                                |         |        |
|--------------------------------|---------|--------|
| Fournierella                   | -0.30   | -0.021 |
| Frisingicoccus                 | 0.12    | 0.48   |
| Fusicatenibacter               | -0.10   | 0.032  |
| Fusobacterium                  | 0.31    | -0.27  |
| Lachnospiraceae_GCA.900066575  | -0.26   | 0.16   |
| Gordonibacter                  | 0.061   | 0.51   |
| Granulicatella                 | 0.28    | -0.19  |
| Haemophilus                    | -0.072  | -0.32  |
| Harryflintia                   | -0.15   | 0.53   |
| Holdemanella                   | -0.48   | -0.32  |
| Holdemania                     | 0.13    | 0.34   |
| Hungatella                     | 0.59    | 0.20   |
| Hydrogenoanaerobacterium       | -0.34   | 0.31   |
| Ruminococcaceae_Incertae_Sedis | 0.008   | 0.48   |
| Intestinibacter                | 0.20    | -0.063 |
| Intestinimonas                 | -0.14   | 0.60   |
| Lachnoclostridium              | 0.66    | -0.18  |
| Lachnospira                    | 0.058   | -0.050 |
| Lachnospiraceae_FCS020_group   | -0.61   | 0.12   |
| Lachnospiraceae_ND3007_group   | -0.51   | -0.020 |
| Lachnospiraceae_NK4A136_group  | -0.46   | 0.16   |
| Lachnospiraceae_UCG.001        | -0.37   | 0.17   |
| Lachnospiraceae_UCG.004        | -0.0035 | -0.28  |
| Lachnospiraceae_UCG.010        | -0.15   | 0.066  |
| Lactobacillus                  | -0.035  | -0.10  |
| Lactococcus                    | 0.033   | 0.14   |
| Marvinbryantia                 | -0.42   | 0.082  |
| Megasphaera                    | -0.053  | -0.35  |
| Monoglobus                     | -0.19   | 0.47   |
| Moryella                       | -0.52   | 0.0087 |
| Negativibacillus               | -0.17   | 0.31   |
| Oscillospiraceae_NK4A214_group | -0.66   | 0.36   |
| Odoribacter                    | -0.36   | 0.20   |
| Oscillibacter                  | -0.19   | 0.59   |
| Oscillospira                   | 0.24    | 0.54   |
| Oxalobacter                    | -0.50   | 0.052  |
| Paludicola                     | -0.34   | 0.56   |
| Parabacteroides                | 0.026   | 0.16   |
| Paraprevotella                 | -0.28   | -0.32  |
| Parasutterella                 | -0.036  | 0.17   |
| Peptococcus                    | -0.33   | 0.19   |
| Phascolarctobacterium          | -0.13   | -0.093 |
| Phocea                         | 0.35    | 0.10   |
| Prevotella                     | -0.38   | -0.45  |

|                     |       |        |
|---------------------|-------|--------|
| <b>Romboutsia</b>   | -0.20 | -0.075 |
| <b>Roseburia</b>    | -0.14 | -0.011 |
| <b>Ruminococcus</b> | -0.45 | 0.34   |
| <b>Sellimonas</b>   | -0.26 | 0.14   |

|                                 |       |        |
|---------------------------------|-------|--------|
| <b>Senegalimassilia</b>         | -0.47 | -0.34  |
| <b>Shuttleworthia</b>           | -0.22 | 0.35   |
| <b>Slackia</b>                  | -0.46 | -0.35  |
| <b>Streptococcus</b>            | 0.046 | -0.057 |
| <b>Subdoligranulum</b>          | -0.41 | 0.29   |
| <b>Sutterella</b>               | -0.19 | -0.46  |
| <b>Saccharimonadaceae_TM7x</b>  | 0.038 | 0.049  |
| <b>Turicibacter</b>             | -0.16 | -0.071 |
| <b>Tuzzerella</b>               | 0.26  | 0.21   |
| <b>Ruminococcaceae_UBA1819</b>  | 0.25  | 0.61   |
| <b>Oscillospiraceae_UCG.002</b> | -0.69 | 0.30   |
| <b>Oscillospiraceae_UCG.003</b> | -0.55 | -0.019 |
| <b>Oscillospiraceae_UCG.005</b> | -0.70 | 0.42   |
| <b>Butyricocccaceae_UCG.009</b> | -0.42 | 0.31   |
| <b>Veillonella</b>              | 0.12  | -0.35  |
| <b>Victivallis</b>              | -0.53 | -0.050 |

eTable 7 : Multivariable-adjusted associations between gut microbial alpha and beta diversity and cognition measures in CARDIA

|         | PCA factor                |         |                           |         | MoCA      |                           |         |                           | DSST    |           |                           |         | RAVLT                     |         |           |                           |         |                           |         |
|---------|---------------------------|---------|---------------------------|---------|-----------|---------------------------|---------|---------------------------|---------|-----------|---------------------------|---------|---------------------------|---------|-----------|---------------------------|---------|---------------------------|---------|
|         | Shannon Diversity Index   |         | Richness                  |         | PERMANOVA | Shannon Diversity Index   |         | Richness                  |         | PERMANOVA | Shannon Diversity Index   |         | Richness                  |         | PERMANOVA | Shannon Diversity Index   |         | Richness                  |         |
|         | Beta Coefficient (95% CI) | p-value | Beta Coefficient (95% CI) | p-value | p-value   | Beta Coefficient (95% CI) | p-value | Beta Coefficient (95% CI) | p-value | p-value   | Beta Coefficient (95% CI) | p-value | Beta Coefficient (95% CI) | p-value | p-value   | Beta Coefficient (95% CI) | p-value | Beta Coefficient (95% CI) | p-value |
| Model 1 | 0.14 (0.02,0.26)          | 0.024   | 0.16 (0.04,0.28)          | 0.009   | 0.001     | 0.05 (-0.21,0.31)         | 0.690   | 0.18 (-0.08,0.44)         | 0.186   | 0.001     | 1.82 (0.62,3.01)          | 0.003   | 1.76 (0.56,2.95)          | 0.004   | 0.001     | 0.14 (0.00,0.28)          | 0.042   | 0.11 (-0.03,0.24)         | 0.124   |
| Model 2 | 0.11 (0.00,0.22)          | 0.060   | 0.08(-0.05,0.21)          | 0.242   | 0.001     | 0.01 (-0.26,0.23)         | 0.923   | 0.09(-0.18,0.36)          | 0.519   | 0.001     | 1.56 (0.42,2.70)          | 0.007   | 1.00(-0.27,2.27)          | 0.123   | 0.001     | 0.11 (-0.02,0.24)         | 0.090   | 0.02(-0.13,0.15)          | 0.798   |
| Model 3 | 0.08 (-0.04,0.20)         | 0.193   | 0.07 (-0.06,0.19)         | 0.284   | 0.001     | 0.02 (-0.28,0.23)         | 0.869   | 0.07 (-0.19,0.33)         | 0.604   | 0.002     | 1.22 (0.01,2.42)          | 0.048   | 0.93 (-0.31,2.16)         | 0.142   | 0.001     | 0.08 (-0.06,0.22)         | 0.278   | 0.01 (-0.13,0.15)         | 0.888   |
| Model 4 | 0.08 (-0.04,0.20)         | 0.207   | 0.06 (-0.06,0.19)         | 0.328   | 0.001     | 0.02 (-0.28,0.23)         | 0.860   | 0.07 (-0.20,0.33)         | 0.623   | 0.001     | 1.22 (0.01,2.43)          | 0.048   | 0.94 (-0.31,2.18)         | 0.141   | 0.001     | 0.08 (-0.06,0.22)         | 0.286   | 0.01 (-0.14,0.15)         | 0.927   |
| Model 5 | 0.08 (-0.04,0.20)         | 0.203   | 0.07 (-0.06,0.20)         | 0.288   | 0.001     | -0.02 (-0.27,0.24)        | 0.891   | 0.08 (-0.19,0.35)         | 0.553   | 0.001     | 1.27 (0.05,2.48)          | 0.041   | 1.08 (-0.20,2.36)         | 0.097   | 0.001     | 0.08 (-0.06,0.22)         | 0.273   | 0.01 (-0.14,0.16)         | 0.865   |

Multivariable-adjusted regression models adjusted for:

Model 1: sequencing batch, age, race, gender, study center

Model 2: Model 1, with education

Model 3: Model 2, with physical activity, diet score, medication use, and smoking

Model 4: Model 3 with BMI

Model 5: Model 4 with hypertension and diabetes



| Stroop    |                         |         |                     |                  |           |                         |                  |                   |         |           |                         |         |                   |         |
|-----------|-------------------------|---------|---------------------|------------------|-----------|-------------------------|------------------|-------------------|---------|-----------|-------------------------|---------|-------------------|---------|
| Stroop    |                         |         |                     |                  |           |                         | Category Fluency |                   |         |           |                         |         |                   |         |
| Stroop    |                         |         |                     | Category Fluency |           |                         |                  | Letter Fluency    |         |           |                         |         |                   |         |
| PERMANOVA | Shannon Diversity Index |         | Richness            |                  | PERMANOVA | Shannon Diversity Index |                  | Richness          |         | PERMANOVA | Shannon Diversity Index |         | Richness          |         |
| p-value   | Beta Coefficient        | p-value | Beta Coefficient    | p-value          | p-value   | Beta Coefficient        | p-value          | Beta Coefficient  | p-value | p-value   | Beta Coefficient        | p-value | Beta Coefficient  | p-value |
|           | (95% CI)                |         | (95% CI)            |                  |           | (95% CI)                |                  | (95% CI)          |         |           | (95% CI)                |         | (95% CI)          |         |
| 0.001     | -1.01 (-1.89,-0.14)     | 0.023   | -1.14 (-2.02,-0.27) | 0.011            | 0.001     | 0.41 (0.02,0.80)        | 0.039            | 0.28 (-0.12,0.67) | 0.170   | 0.002     | 0.31 (-0.66,1.28)       | 0.534   | 0.84 (-0.13,1.81) | 0.090   |
| 0.001     | -0.93 (-1.79,-0.06)     | 0.036   | -0.69(-1.60,0.23)   | 0.138            | 0.002     | 0.34 (-0.04,0.72)       | 0.076            | 0.10(-0.33,0.54)  | 0.642   | 0.003     | 0.16 (-0.78,1.11)       | 0.733   | 0.44(-0.62,1.49)  | 0.416   |
| 0.001     | -0.75 (-1.65,0.14)      | 0.100   | -0.69 (-1.60,0.23)  | 0.143            | 0.005     | 0.34 (-0.07,0.75)       | 0.106            | 0.08 (-0.34,0.50) | 0.712   | 0.003     | 0.06 (-0.94,1.07)       | 0.906   | 0.38 (-0.65,1.41) | 0.469   |
| 0.001     | -0.75 (-1.65,0.15)      | 0.103   | -0.68 (-1.60,0.25)  | 0.151            | 0.007     | 0.33 (-0.08,0.74)       | 0.118            | 0.05 (-0.37,0.48) | 0.812   | 0.001     | 0.04 (-0.96,1.05)       | 0.930   | 0.35 (-0.69,1.38) | 0.514   |
| 0.001     | -0.75 (-1.65,0.16)      | 0.106   | -0.79 (-1.74,0.16)  | 0.104            | 0.007     | 0.32 (-0.10,0.73)       | 0.133            | 0.04 (-0.40,0.48) | 0.862   | 0.001     | 0.05 (-0.96,1.05)       | 0.928   | 0.31 (-0.75,1.37) | 0.562   |

eTable 8: PERMANOVA tests (p-values) for interaction between beta-diversity (PCoA) and sex (panel a) and race (panel b).

| <b>Panel A: Sex</b>  |           |       |             |             |              |               |                         |                       |
|----------------------|-----------|-------|-------------|-------------|--------------|---------------|-------------------------|-----------------------|
|                      | <b>PC</b> |       | <b>DSST</b> | <b>MOCA</b> | <b>RAVLT</b> | <b>Stroop</b> | <b>Category fluency</b> | <b>Letter fluency</b> |
| Model 1              |           | 0.054 | 0.419       | 0.139       | 0.007        | 0.499         | 0.043                   | 0.029                 |
| Model 2              |           | 0.052 | 0.492       | 0.13        | 0.011        | 0.449         | 0.056                   | 0.034                 |
| Model 3              |           | 0.079 | 0.52        | 0.196       | 0.009        | 0.151         | 0.047                   | 0.022                 |
| Model 4              |           | 0.172 | 0.741       | 0.341       | 0.029        | 0.134         | 0.077                   | 0.062                 |
| Model 5              |           | 0.249 | 0.774       | 0.359       | 0.041        | 0.152         | 0.111                   | 0.056                 |
| <b>Panel B: Race</b> |           |       |             |             |              |               |                         |                       |
|                      | <b>PC</b> |       | <b>DSST</b> | <b>MOCA</b> | <b>RAVLT</b> | <b>Stroop</b> | <b>Category fluency</b> | <b>Letter fluency</b> |
| Model 1              |           | 0.193 | 0.29        | 0.746       | 0.293        | 0.286         | 0.626                   | 0.35                  |
| Model 2              |           | 0.208 | 0.335       | 0.76        | 0.256        | 0.327         | 0.599                   | 0.352                 |
| Model 3              |           | 0.179 | 0.323       | 0.652       | 0.264        | 0.251         | 0.537                   | 0.321                 |
| Model 4              |           | 0.152 | 0.323       | 0.623       | 0.279        | 0.237         | 0.57                    | 0.296                 |
| Model 5              |           | 0.185 | 0.369       | 0.733       | 0.342        | 0.295         | 0.552                   | 0.279                 |

Multivariable-adjusted regression models adjusted for:

Model 1: sequencing batch, age, race, gender, study center

Model 2: Model 1, with education

Model 3: Model 2, with physical activity, diet score, medication use, and smoking

Model 4: Model 3 with BMI

Model 5: Model 4 with hypertension and diabetes

eTable 9: PERMANOVA test (p-value) for sex- (panel A & B) and race- (panel C & D) stratified results.

| <b>Panel A</b> |                 |             |             |                    |               |                         |                       |
|----------------|-----------------|-------------|-------------|--------------------|---------------|-------------------------|-----------------------|
|                | <b>PC (1st)</b> | <b>DSST</b> | <b>MOCA</b> | <b>Male RAVLT</b>  | <b>Stroop</b> | <b>Category fluency</b> | <b>Letter fluency</b> |
| Model 1        | 0.01            | 0.004       | 0.028       | 0.002              | 0.286         | 0.126                   | 0.11                  |
| Model 2        | 0.009           | 0.013       | 0.017       | 0.003              | 0.284         | 0.114                   | 0.118                 |
| Model 3        | 0.011           | 0.01        | 0.023       | 0.003              | 0.544         | 0.101                   | 0.114                 |
| Model 4        | 0.015           | 0.01        | 0.021       | 0.006              | 0.554         | 0.112                   | 0.103                 |
| Model 5        | 0.01            | 0.017       | 0.022       | 0.003              | 0.545         | 0.112                   | 0.107                 |
| <b>Panel B</b> |                 |             |             |                    |               |                         |                       |
|                |                 |             |             | <b>Female</b>      |               |                         |                       |
|                | <b>PC (1st)</b> | <b>DSST</b> | <b>MOCA</b> | <b>RAVLT</b>       | <b>Stroop</b> | <b>Category fluency</b> | <b>Letter fluency</b> |
| Model 1        | 0.001           | 0.001       | 0.001       | 0.006              | 0.002         | 0.002                   | 0.01                  |
| Model 2        | 0.001           | 0.001       | 0.002       | 0.005              | 0.001         | 0.001                   | 0.006                 |
| Model 3        | 0.001           | 0.001       | 0.001       | 0.004              | 0.001         | 0.001                   | 0.012                 |
| Model 4        | 0.001           | 0.001       | 0.001       | 0.006              | 0.002         | 0.001                   | 0.005                 |
| Model 5        | 0.001           | 0.001       | 0.001       | 0.007              | 0.001         | 0.001                   | 0.007                 |
| <b>Panel C</b> |                 |             |             |                    |               |                         |                       |
|                | <b>PC (1st)</b> | <b>DSST</b> | <b>MOCA</b> | <b>Black RAVLT</b> | <b>Stroop</b> | <b>Category fluency</b> | <b>Letter fluency</b> |
| Model 1        | 0.026           | 0.007       | 0.177       | 0.118              | 0.125         | 0.106                   | 0.202                 |
| Model 2        | 0.031           | 0.005       | 0.176       | 0.124              | 0.129         | 0.108                   | 0.191                 |
| Model 3        | 0.031           | 0.007       | 0.184       | 0.12               | 0.253         | 0.083                   | 0.168                 |
| Model 4        | 0.026           | 0.011       | 0.195       | 0.11               | 0.229         | 0.091                   | 0.188                 |
| Model 5        | 0.033           | 0.001       | 0.174       | 0.111              | 0.322         | 0.086                   | 0.173                 |
| <b>Panel D</b> |                 |             |             |                    |               |                         |                       |
|                | <b>PC (1st)</b> | <b>DSST</b> | <b>MOCA</b> | <b>White RAVLT</b> | <b>Stroop</b> | <b>Category fluency</b> | <b>Letter fluency</b> |
| Model 1        | 0.022           | 0.012       | 0.087       | 0.017              | 0.098         | 0.017                   | 0.742                 |
| Model 2        | 0.015           | 0.015       | 0.088       | 0.019              | 0.127         | 0.015                   | 0.707                 |
| Model 3        | 0.01            | 0.012       | 0.077       | 0.013              | 0.042         | 0.013                   | 0.717                 |
| Model 4        | 0.007           | 0.015       | 0.077       | 0.019              | 0.058         | 0.019                   | 0.716                 |
| Model 5        | 0.015           | 0.007       | 0.08        | 0.021              | 0.047         | 0.01                    | 0.691                 |

Multivariable-adjusted regression models adjusted for:

Model 1: sequencing batch, age, race, gender, study center

Model 2: Model 1, with education

Model 3: Model 2, with physical activity, diet score, medication use, and smoking

Model 4: Model 3 with BMI

Model 5: Model 4 with hypertension and diabetes

eTable 10: P-values for interaction between sex (panel A) and race (panel B) with alpha diversity measures (Shannon and richness)

| <b>Panel A: Sex</b>     |      |          |      | <b>Panel B: Race</b> |      |
|-------------------------|------|----------|------|----------------------|------|
| <b>PC (1st axis)</b>    |      |          |      |                      |      |
| Shannon                 |      | Richness |      | Shannon              |      |
| Richness                |      |          |      | Richness             |      |
| Model 1                 | 0.36 |          | 0.88 | 0.75                 | 0.93 |
| Model 2                 | 0.23 |          | 0.75 | 0.74                 | 0.91 |
| Model 3                 | 0.21 |          | 0.78 | 0.92                 | 0.96 |
| Model 4                 | 0.21 |          | 0.78 | 0.88                 | 0.98 |
| Model 5                 | 0.20 |          | 0.70 | 0.96                 | 0.98 |
| <b>DSST</b>             |      |          |      |                      |      |
| Shannon                 |      | Richness |      | Shannon              |      |
| Richness                |      |          |      | Richness             |      |
| Model 1                 | 0.95 |          | 0.25 | 0.13                 | 0.51 |
| Model 2                 | 0.82 |          | 0.27 | 0.12                 | 0.50 |
| Model 3                 | 0.88 |          | 0.31 | 0.18                 | 0.52 |
| Model 4                 | 0.87 |          | 0.31 | 0.18                 | 0.53 |
| Model 5                 | 0.81 |          | 0.38 | 0.18                 | 0.47 |
| <b>MOCA</b>             |      |          |      |                      |      |
| Shannon                 |      | Richness |      | Shannon              |      |
| Richness                |      |          |      | Richness             |      |
| Model 1                 | 0.45 |          | 0.80 | 0.62                 | 0.86 |
| Model 2                 | 0.31 |          | 0.89 | 0.59                 | 0.84 |
| Model 3                 | 0.12 |          | 0.82 | 0.62                 | 0.96 |
| Model 4                 | 0.12 |          | 0.81 | 0.63                 | 0.96 |
| Model 5                 | 0.10 |          | 0.66 | 0.59                 | 0.82 |
| <b>RAVLT</b>            |      |          |      |                      |      |
| Shannon                 |      | Richness |      | Shannon              |      |
| Richness                |      |          |      | Richness             |      |
| Model 1                 | 0.89 |          | 0.50 | 0.29                 | 0.02 |
| Model 2                 | 0.99 |          | 0.41 | 0.26                 | 0.01 |
| Model 3                 | 0.94 |          | 0.66 | 0.30                 | 0.02 |
| Model 4                 | 0.95 |          | 0.66 | 0.31                 | 0.02 |
| Model 5                 | 0.91 |          | 0.61 | 0.29                 | 0.03 |
| <b>Stroop</b>           |      |          |      |                      |      |
| Shannon                 |      | Richness |      | Shannon              |      |
| Richness                |      |          |      | Richness             |      |
| Model 1                 | 0.86 |          | 0.76 | 0.47                 | 0.17 |
| Model 2                 | 0.92 |          | 0.82 | 0.46                 | 0.17 |
| Model 3                 | 0.69 |          | 0.77 | 0.70                 | 0.31 |
| Model 4                 | 0.70 |          | 0.77 | 0.69                 | 0.31 |
| Model 5                 | 0.70 |          | 0.67 | 0.66                 | 0.23 |
| <b>Category fluency</b> |      |          |      |                      |      |
| Shannon                 |      | Richness |      | Shannon              |      |
| Richness                |      |          |      | Richness             |      |
| Model 1                 | 0.27 |          | 0.87 | 0.66                 | 0.47 |
| Model 2                 | 0.21 |          | 0.79 | 0.66                 | 0.46 |
| Model 3                 | 0.25 |          | 0.80 | 0.97                 | 0.56 |
| Model 4                 | 0.25 |          | 0.79 | 0.92                 | 0.54 |
| Model 5                 | 0.27 |          | 0.77 | 0.98                 | 0.60 |
| <b>Letter fluency</b>   |      |          |      |                      |      |
| Shannon                 |      | Richness |      | Shannon              |      |
| Richness                |      |          |      | Richness             |      |
| Model 1                 | 0.48 |          | 0.92 | 0.34                 | 0.57 |
| Model 2                 | 0.38 |          | 0.83 | 0.32                 | 0.55 |
| Model 3                 | 0.54 |          | 0.98 | 0.43                 | 0.44 |
| Model 4                 | 0.54 |          | 0.99 | 0.41                 | 0.43 |
| Model 5                 | 0.52 |          | 0.97 | 0.49                 | 0.46 |

Multivariable-adjusted regression models adjusted for:

Model 1: sequencing batch, age, race, gender, study center

Model 2: Model 1, with education

Model 3: Model 2, with physical activity, diet score, medication use, and smoking

Model 4: Model 3 with BMI

Model 5: Model 4 with hypertension and diabetes

eTable 11: Beta-coefficients (95% CI) and p-values for alpha-diversity measures (Shannon and richness) within strata of sex (panel A) and race (panel B)

| Panel A PC (1st)        |                   |            |                    |            | Panel B           |            |                   |            |                   | White      |                   |            |                    |            | Black              |            |          |            |        |
|-------------------------|-------------------|------------|--------------------|------------|-------------------|------------|-------------------|------------|-------------------|------------|-------------------|------------|--------------------|------------|--------------------|------------|----------|------------|--------|
| Female                  |                   | Male       |                    |            | Shannon           |            | Richness          |            |                   | Shannon    |                   | Richness   |                    |            | Shannon            |            | Richness |            |        |
| Beta Coeff              | pValue            | Beta Coeff | pValue             | Beta Coeff | pValue            | Beta Coeff | pValue            | Beta Coeff | pValue            | Beta Coeff | pValue            | Beta Coeff | pValue             | Beta Coeff | pValue             | Beta Coeff | pValue   | Beta Coeff | pValue |
| Model 1                 | 0.19(0.03,0.36)   | 0.02       | 0.19(0.02,0.35)    | 0.03       | 0.09(-0.10,0.28)  | 0.36       | 0.14(-0.05,0.33)  | 0.14       | 0.14(-0.04,0.31)  | 0.13       | 0.18(0.00,0.36)   | 0.05       | 0.17(-0.01,0.35)   | 0.07       | 0.16(-0.01,0.33)   | 0.06       |          |            |        |
| Model 2                 | 0.18(0.02,0.33)   | 0.03       | 0.15(0.00,0.31)    | 0.06       | 0.02(-0.15,0.19)  | 0.83       | 0.08(-0.09,0.25)  | 0.38       | 0.10(-0.06,0.27)  | 0.21       | 0.14(-0.03,0.31)  | 0.10       | 0.12(-0.04,0.28)   | 0.14       | 0.10(-0.06,0.26)   | 0.21       |          |            |        |
| Model 3                 | 0.16(0.00,0.33)   | 0.06       | 0.12(-0.06,0.29)   | 0.19       | -0.05(-0.23,0.14) | 0.62       | 0.02(-0.17,0.20)  | 0.85       | 0.06(-0.11,0.23)  | 0.50       | 0.06(-0.13,0.24)  | 0.55       | 0.09(-0.09,0.27)   | 0.33       | 0.06(-0.11,0.24)   | 0.47       |          |            |        |
| Model 4                 | 0.16(-0.01,0.32)  | 0.06       | 0.10(-0.07,0.28)   | 0.25       | -0.04(-0.23,0.14) | 0.66       | 0.03(-0.15,0.22)  | 0.73       | 0.04(-0.13,0.22)  | 0.64       | 0.03(-0.15,0.21)  | 0.73       | 0.09(-0.09,0.27)   | 0.33       | 0.07(-0.11,0.25)   | 0.46       |          |            |        |
| Model 5                 | 0.16(-0.01,0.32)  | 0.06       | 0.13(-0.05,0.31)   | 0.16       | -0.04(-0.22,0.15) | 0.71       | 0.04(-0.15,0.22)  | 0.68       | 0.05(-0.13,0.22)  | 0.61       | 0.02(-0.16,0.21)  | 0.80       | 0.09(-0.09,0.27)   | 0.34       | 0.11(-0.08,0.29)   | 0.26       |          |            |        |
| <b>MOCA</b>             |                   |            |                    |            |                   |            |                   |            |                   |            |                   |            |                    |            |                    |            |          |            |        |
| Model 1                 | 0.15(-0.20,0.50)  | 0.39       | 0.18(-0.17,0.53)   | 0.32       | -0.07(-0.49,0.35) | 0.75       | 0.18(-0.23,0.60)  | 0.38       | 0.18(-0.14,0.50)  | 0.27       | 0.25(-0.08,0.58)  | 0.14       | -0.03(-0.47,0.41)  | 0.89       | 0.13(-0.29,0.55)   | 0.54       |          |            |        |
| Model 2                 | 0.12(-0.21,0.44)  | 0.47       | 0.09(-0.23,0.42)   | 0.57       | -0.19(-0.59,0.20) | 0.33       | 0.07(-0.32,0.46)  | 0.74       | 0.12(-0.18,0.42)  | 0.43       | 0.17(-0.14,0.48)  | 0.29       | -0.13(-0.54,0.28)  | 0.54       | 0.00(-0.39,0.39)   | 0.99       |          |            |        |
| Model 3                 | 0.17(-0.17,0.50)  | 0.33       | 0.11(-0.24,0.46)   | 0.55       | -0.27(-0.69,0.14) | 0.20       | 0.04(-0.38,0.45)  | 0.87       | 0.10(-0.23,0.42)  | 0.56       | 0.12(-0.22,0.46)  | 0.47       | -0.15(-0.58,0.28)  | 0.48       | 0.00(-0.43,0.42)   | 0.99       |          |            |        |
| Model 4                 | 0.16(-0.18,0.50)  | 0.35       | 0.10(-0.26,0.45)   | 0.59       | -0.26(-0.68,0.16) | 0.22       | 0.07(-0.35,0.48)  | 0.76       | 0.06(-0.26,0.39)  | 0.70       | 0.08(-0.26,0.42)  | 0.64       | -0.16(-0.59,0.27)  | 0.47       | 0.01(-0.41,0.44)   | 0.96       |          |            |        |
| Model 5                 | 0.18(-0.16,0.52)  | 0.31       | 0.17(-0.19,0.54)   | 0.35       | -0.26(-0.68,0.15) | 0.22       | 0.04(-0.38,0.46)  | 0.85       | 0.06(-0.26,0.39)  | 0.70       | 0.04(-0.30,0.39)  | 0.82       | -0.14(-0.57,0.30)  | 0.53       | 0.12(-0.32,0.56)   | 0.60       |          |            |        |
| <b>DSST</b>             |                   |            |                    |            |                   |            |                   |            |                   |            |                   |            |                    |            |                    |            |          |            |        |
| Model 1                 | 1.94(0.27,3.60)   | 0.02       | 1.45(-0.23,3.13)   | 0.09       | 2.05(0.32,3.77)   | 0.02       | 2.66(0.97,4.35)   | 0.00       | 1.38(-0.29,3.05)  | 0.11       | 1.59(-0.14,3.32)  | 0.07       | 3.00(1.27,4.73)    | 0.00       | 2.45(0.79,4.12)    | 0.00       |          |            |        |
| Model 2                 | 1.83(0.21,3.46)   | 0.03       | 1.20(-0.44,2.85)   | 0.15       | 1.49(-0.11,3.10)  | 0.07       | 2.14(0.57,3.72)   | 0.01       | 1.15(-0.47,2.76)  | 0.16       | 1.28(-0.40,2.95)  | 0.13       | 2.64(1.01,4.27)    | 0.00       | 1.96(0.39,3.54)    | 0.01       |          |            |        |
| Model 3                 | 1.54(-0.19,3.27)  | 0.08       | 0.89(-0.90,2.69)   | 0.33       | 0.85(-0.84,2.55)  | 0.32       | 1.47(-0.20,3.14)  | 0.08       | 0.66(-1.09,2.41)  | 0.46       | 0.70(-1.13,2.53)  | 0.45       | 2.31(0.58,4.05)    | 0.01       | 1.69(-0.03,3.40)   | 0.05       |          |            |        |
| Model 4                 | 1.48(-0.24,3.19)  | 0.09       | 0.73(-1.06,2.52)   | 0.43       | 0.98(-0.71,2.66)  | 0.26       | 1.79(0.12,3.46)   | 0.04       | 0.48(-1.28,2.23)  | 0.59       | 0.47(-1.37,2.32)  | 0.61       | 2.30(0.57,4.03)    | 0.01       | 1.75(0.03,3.47)    | 0.05       |          |            |        |
| Model 5                 | 1.52(-0.20,3.23)  | 0.08       | 1.11(-0.74,2.96)   | 0.24       | 1.01(-0.68,2.69)  | 0.24       | 1.77(0.08,3.45)   | 0.04       | 0.52(-1.25,2.28)  | 0.57       | 0.45(-1.41,2.32)  | 0.63       | 2.35(0.61,4.10)    | 0.01       | 2.16(0.38,3.95)    | 0.02       |          |            |        |
| <b>Category fluency</b> |                   |            |                    |            |                   |            |                   |            |                   |            |                   |            |                    |            |                    |            |          |            |        |
| Model 1                 | 0.62(0.09,1.15)   | 0.02       | 0.30(-0.23,0.84)   | 0.27       | 0.24(-0.37,0.86)  | 0.44       | 0.26(-0.35,0.87)  | 0.40       | 0.29(-0.28,0.86)  | 0.32       | 0.12(-0.47,0.72)  | 0.68       | 0.42(-0.14,0.98)   | 0.14       | 0.35(-0.18,0.89)   | 0.19       |          |            |        |
| Model 2                 | 0.58(0.07,1.09)   | 0.03       | 0.22(-0.30,0.74)   | 0.41       | 0.12(-0.49,0.72)  | 0.71       | 0.14(-0.45,0.74)  | 0.64       | 0.21(-0.34,0.76)  | 0.46       | 0.01(-0.56,0.59)  | 0.96       | 0.34(-0.20,0.88)   | 0.22       | 0.25(-0.28,0.77)   | 0.35       |          |            |        |
| Model 3                 | 0.62(0.06,1.18)   | 0.03       | 0.19(-0.39,0.77)   | 0.53       | 0.03(-0.63,0.70)  | 0.92       | -0.04(-0.70,0.62) | 0.90       | 0.28(-0.32,0.87)  | 0.36       | -0.07(-0.70,0.55) | 0.82       | 0.28(-0.33,0.89)   | 0.37       | 0.17(-0.43,0.77)   | 0.59       |          |            |        |
| Model 4                 | 0.61(0.05,1.17)   | 0.03       | 0.17(-0.42,0.75)   | 0.58       | 0.03(-0.64,0.70)  | 0.94       | -0.06(-0.73,0.61) | 0.85       | 0.25(-0.35,0.85)  | 0.41       | -0.11(-0.74,0.52) | 0.73       | 0.28(-0.33,0.90)   | 0.36       | 0.14(-0.46,0.74)   | 0.64       |          |            |        |
| Model 5                 | 0.59(0.03,1.15)   | 0.04       | 0.19(-0.41,0.80)   | 0.53       | 0.03(-0.64,0.71)  | 0.92       | -0.07(-0.74,0.61) | 0.85       | 0.25(-0.35,0.86)  | 0.41       | -0.14(-0.77,0.50) | 0.68       | 0.25(-0.37,0.86)   | 0.43       | 0.14(-0.49,0.76)   | 0.66       |          |            |        |
| <b>Letter fluency</b>   |                   |            |                    |            |                   |            |                   |            |                   |            |                   |            |                    |            |                    |            |          |            |        |
| Model 1                 | 0.56(-0.73,1.86)  | 0.39       | 0.94(-0.37,2.24)   | 0.16       | -0.21(-1.75,1.33) | 0.79       | 0.63(-0.89,2.15)  | 0.41       | -0.18(-1.54,1.17) | 0.79       | 0.58(-0.83,2.00)  | 0.42       | 0.66(-0.79,2.11)   | 0.37       | 1.09(-0.30,2.47)   | 0.12       |          |            |        |
| Model 2                 | 0.52(-0.76,1.79)  | 0.42       | 0.80(-0.49,2.09)   | 0.22       | -0.59(-2.07,0.90) | 0.44       | 0.28(-1.18,1.75)  | 0.70       | -0.33(-1.66,1.00) | 0.63       | 0.39(-1.01,1.78)  | 0.58       | 0.46(-0.95,1.87)   | 0.52       | 0.81(-0.54,2.15)   | 0.24       |          |            |        |
| Model 3                 | 0.37(-0.98,1.72)  | 0.59       | 0.57(-0.84,1.97)   | 0.43       | -0.82(-2.44,0.79) | 0.32       | 0.05(-1.55,1.65)  | 0.95       | -0.57(-1.99,0.86) | 0.43       | -0.30(-1.80,1.19) | 0.69       | 0.58(-0.94,2.10)   | 0.45       | 0.87(-0.62,2.36)   | 0.25       |          |            |        |
| Model 4                 | 0.34(-1.01,1.69)  | 0.62       | 0.49(-0.92,1.90)   | 0.49       | -0.82(-2.44,0.80) | 0.32       | 0.07(-1.54,1.69)  | 0.93       | -0.72(-2.15,0.70) | 0.32       | -0.51(-2.02,1.00) | 0.51       | 0.58(-0.94,2.10)   | 0.45       | 0.89(-0.60,2.38)   | 0.24       |          |            |        |
| Model 5                 | 0.33(-1.01,1.68)  | 0.63       | 0.41(-1.04,1.87)   | 0.58       | -0.82(-2.45,0.81) | 0.32       | 0.06(-1.59,1.70)  | 0.94       | -0.66(-2.07,0.76) | 0.36       | -0.50(-2.01,1.01) | 0.52       | 0.51(-1.03,2.04)   | 0.51       | 0.97(-0.58,2.52)   | 0.22       |          |            |        |
| <b>Stroop</b>           |                   |            |                    |            |                   |            |                   |            |                   |            |                   |            |                    |            |                    |            |          |            |        |
| Model 1                 | -1.05(-2.16,0.06) | 0.06       | -1.20(-2.32,-0.08) | 0.04       | -1.30(-2.75,0.15) | 0.08       | -1.41(-2.84,0.01) | 0.05       | -0.85(-1.95,0.25) | 0.13       | -0.62(-1.77,0.52) | 0.28       | -1.55(-3.01,-0.10) | 0.04       | -1.94(-3.32,-0.55) | 0.01       |          |            |        |
| Model 2                 | -1.03(-2.14,0.08) | 0.07       | -1.14(-2.26,-0.03) | 0.04       | -1.07(-2.51,0.37) | 0.14       | -1.20(-2.62,0.21) | 0.10       | -0.81(-1.91,0.30) | 0.15       | -0.58(-1.72,0.57) | 0.32       | -1.39(-2.81,0.04)  | 0.06       | -1.71(-3.07,-0.35) | 0.01       |          |            |        |
| Model 3                 | -1.10(-2.31,0.10) | 0.07       | -1.14(-2.39,0.11)  | 0.07       | -0.58(-2.02,0.86) | 0.43       | -0.56(-1.98,0.86) | 0.44       | -0.63(-1.82,0.57) | 0.30       | -0.25(-1.50,1.00) | 0.69       | -0.90(-2.39,0.58)  | 0.23       | -1.21(-2.66,0.23)  | 0.10       |          |            |        |
| Model 4                 | -1.08(-2.29,0.12) | 0.08       | -1.07(-2.32,0.18)  | 0.09       | -0.60(-2.04,0.85) | 0.42       | -0.61(-2.04,0.82) | 0.40       | -0.60(-1.81,0.61) | 0.33       | -0.21(-1.47,1.05) | 0.74       | -0.90(-2.40,0.59)  | 0.23       | -1.22(-2.67,0.24)  | 0.10       |          |            |        |
| Model 5                 | -1.07(-2.29,0.15) | 0.08       | -1.33(-2.64,-0.03) | 0.05       | -0.64(-2.08,0.81) | 0.39       | -0.66(-2.11,0.79) | 0.37       | -0.58(-1.79,0.63) | 0.35       | -0.15(-1.43,1.12) | 0.82       | -0.92(-2.42,0.58)  | 0.23       | -1.59(-3.10,-0.09) | 0.04       |          |            |        |
| <b>RAVLT</b>            |                   |            |                    |            |                   |            |                   |            |                   |            |                   |            |                    |            |                    |            |          |            |        |
| Model 1                 | 0.62(0.09,1.15)   | 0.02       | 0.30(-0.23,0.84)   | 0.27       | 0.24(-0.37,0.86)  | 0.44       | 0.26(-0.35,0.87)  | 0.40       | 0.29(-0.28,0.86)  | 0.32       | 0.12(-0.47,0.72)  | 0.68       | 0.42(-0.14,0.98)   | 0.14       | 0.35(-0.18,0.89)   | 0.19       |          |            |        |

|         | Beta Coeff       | pValue | Beta Coeff       | pValue | Beta Coeff       | pValue | Beta Coeff        | pValue | Beta Coeff       | pValue | Beta Coeff       | pValue | Beta Coeff       | pValue |                   |      |
|---------|------------------|--------|------------------|--------|------------------|--------|-------------------|--------|------------------|--------|------------------|--------|------------------|--------|-------------------|------|
| Model 1 | 0.12(-0.06,0.31) | 0.20   | 0.14(-0.04,0.33) | 0.13   | 0.16(-0.05,0.36) | 0.14   | 0.03(-0.17,0.24)  | 0.76   | 0.20(0.01,0.40)  | 0.04   | 0.28(0.08,0.48)  | 0.01   | 0.09(-0.11,0.29) | 0.38   | -0.05(-0.25,0.14) | 0.59 |
| Model 2 | 0.11(-0.07,0.29) | 0.23   | 0.11(-0.07,0.29) | 0.23   | 0.10(-0.10,0.30) | 0.32   | -0.02(-0.22,0.17) | 0.82   | 0.18(-0.01,0.37) | 0.06   | 0.25(0.05,0.44)  | 0.01   | 0.05(-0.14,0.24) | 0.61   | -0.11(-0.29,0.07) | 0.23 |
| Model 3 | 0.08(-0.11,0.27) | 0.43   | 0.03(-0.17,0.23) | 0.74   | 0.05(-0.16,0.26) | 0.64   | -0.05(-0.26,0.16) | 0.64   | 0.11(-0.09,0.31) | 0.28   | 0.14(-0.07,0.35) | 0.18   | 0.02(-0.20,0.23) | 0.89   | -0.17(-0.38,0.04) | 0.11 |
| Model 4 | 0.07(-0.12,0.27) | 0.45   | 0.02(-0.18,0.22) | 0.82   | 0.06(-0.16,0.27) | 0.59   | -0.03(-0.25,0.18) | 0.77   | 0.10(-0.10,0.30) | 0.34   | 0.13(-0.08,0.33) | 0.24   | 0.01(-0.20,0.23) | 0.90   | -0.17(-0.37,0.04) | 0.12 |
| Model 5 | 0.07(-0.12,0.27) | 0.45   | 0.04(-0.16,0.25) | 0.68   | 0.07(-0.14,0.29) | 0.49   | -0.01(-0.22,0.21) | 0.96   | 0.10(-0.10,0.30) | 0.33   | 0.11(-0.10,0.32) | 0.31   | 0.02(-0.19,0.24) | 0.83   | -0.13(-0.35,0.09) | 0.24 |

Shannon and richness were standardized to mean=0 and SD=1 for analysis. Multivariable-adjusted regression models adjusted for:

Model 1: sequencing batch, age, race, gender, study center

Model 2: Model 1, with education

Model 3: Model 2, with physical activity, diet score, medication use, and smoking

Model 4: Model 3 with BMI

Model 5: Model 4 with hypertension and diabetes

eTable 12: Multivariable-adjusted regression coefficients, p-values, and false discovery rate (FDR)-adjusted p-values for genera with respect to DSST.

|                               | Model1 |         |      | Model2 |         |      | Model3 |         |      | Model4 |         |      | Model5 |         |      |
|-------------------------------|--------|---------|------|--------|---------|------|--------|---------|------|--------|---------|------|--------|---------|------|
|                               | beta   | p-value | FDR  | beta   | p-value | FDR  | beta   | p-value | FDR  | beta   | p-value | FDR  | beta   | p-value | FDR  |
| Acetanaerobacterium           | -0.33  | 0.80    | 0.91 | 0.32   | 0.80    | 0.95 | 0.37   | 0.77    | 0.93 | 0.37   | 0.78    | 0.93 | 0.15   | 0.91    | 0.97 |
| Acidaminococcus               | -0.60  | 0.16    | 0.33 | -0.16  | 0.70    | 0.92 | 0.11   | 0.80    | 0.94 | 0.11   | 0.80    | 0.94 | 0.11   | 0.81    | 0.96 |
| Actinomyces                   | -0.44  | 0.70    | 0.87 | -0.08  | 0.94    | 0.96 | 0.78   | 0.50    | 0.87 | 0.78   | 0.50    | 0.87 | 0.97   | 0.41    | 0.83 |
| Adlercreutzia                 | 1.29   | 0.06    | 0.18 | 1.14   | 0.08    | 0.35 | 1.12   | 0.11    | 0.75 | 1.12   | 0.11    | 0.74 | 1.06   | 0.13    | 0.79 |
| Agathobacter                  | 0.39   | 0.65    | 0.83 | 0.26   | 0.75    | 0.94 | -0.36  | 0.67    | 0.93 | -0.36  | 0.67    | 0.93 | -0.30  | 0.73    | 0.96 |
| Akkermansia                   | 1.57   | 0.00    | 0.02 | 1.25   | 0.00    | 0.10 | 1.25   | 0.01    | 0.29 | 1.25   | 0.01    | 0.29 | 1.28   | 0.00    | 0.19 |
| Alistipes                     | 0.92   | 0.22    | 0.40 | 0.60   | 0.40    | 0.69 | 0.29   | 0.69    | 0.93 | 0.29   | 0.69    | 0.93 | 0.23   | 0.76    | 0.96 |
| Allisonella                   | -1.91  | 0.03    | 0.13 | -0.75  | 0.38    | 0.69 | -0.35  | 0.70    | 0.93 | -0.35  | 0.70    | 0.93 | -0.29  | 0.75    | 0.96 |
| Anaerofilum                   | 2.05   | 0.04    | 0.14 | 1.03   | 0.28    | 0.66 | 1.04   | 0.29    | 0.87 | 1.05   | 0.29    | 0.87 | 1.13   | 0.25    | 0.83 |
| Anaerostipes                  | 0.54   | 0.61    | 0.83 | 0.07   | 0.94    | 0.96 | 0.02   | 0.98    | 1.00 | 0.02   | 0.98    | 1.00 | 0.10   | 0.93    | 0.98 |
| Anaerotruncus                 | 1.52   | 0.09    | 0.22 | 1.20   | 0.17    | 0.48 | 0.93   | 0.30    | 0.87 | 0.94   | 0.30    | 0.87 | 0.89   | 0.33    | 0.83 |
| Bacteroides                   | -1.71  | 0.28    | 0.49 | -2.14  | 0.16    | 0.48 | -1.50  | 0.33    | 0.87 | -1.50  | 0.33    | 0.87 | -1.63  | 0.29    | 0.83 |
| Barnesiella                   | 1.37   | 0.00    | 0.02 | 1.37   | 0.00    | 0.03 | 1.11   | 0.01    | 0.29 | 1.11   | 0.01    | 0.29 | 1.18   | 0.01    | 0.19 |
| Bifidobacterium               | 0.00   | 0.99    | 0.99 | 0.53   | 0.32    | 0.69 | 0.32   | 0.56    | 0.89 | 0.32   | 0.56    | 0.89 | 0.36   | 0.51    | 0.84 |
| Bilophila                     | 0.15   | 0.80    | 0.91 | -0.11  | 0.83    | 0.95 | -0.38  | 0.50    | 0.87 | -0.38  | 0.50    | 0.87 | -0.41  | 0.47    | 0.83 |
| Blautia                       | 4.54   | 0.02    | 0.12 | 3.75   | 0.05    | 0.32 | 4.44   | 0.02    | 0.45 | 4.44   | 0.02    | 0.45 | 4.88   | 0.01    | 0.38 |
| Butyricicoccus                | 2.89   | 0.03    | 0.13 | 1.57   | 0.23    | 0.57 | 1.35   | 0.31    | 0.87 | 1.36   | 0.31    | 0.87 | 1.47   | 0.28    | 0.83 |
| Butyricimonas                 | 0.42   | 0.39    | 0.61 | 0.18   | 0.71    | 0.92 | 0.16   | 0.75    | 0.93 | 0.16   | 0.75    | 0.93 | 0.13   | 0.79    | 0.96 |
| CAG.56                        | 0.71   | 0.21    | 0.40 | 0.40   | 0.46    | 0.72 | -0.11  | 0.85    | 0.96 | -0.11  | 0.85    | 0.97 | -0.07  | 0.91    | 0.97 |
| Candidatus_Soleaferrea        | 1.34   | 0.24    | 0.44 | 0.89   | 0.41    | 0.70 | 0.88   | 0.43    | 0.87 | 0.88   | 0.43    | 0.87 | 0.77   | 0.50    | 0.84 |
| Caproiciproducens             | 0.60   | 0.54    | 0.79 | 0.62   | 0.50    | 0.75 | 0.02   | 0.99    | 1.00 | 0.01   | 0.99    | 1.00 | 0.00   | 1.00    | 1.00 |
| Christensenellaceae_R.7_group | 1.57   | 0.00    | 0.02 | 1.18   | 0.01    | 0.14 | 0.78   | 0.11    | 0.75 | 0.79   | 0.11    | 0.74 | 0.86   | 0.08    | 0.65 |
| Clostridium_sensu_stricto_1   | 0.19   | 0.75    | 0.89 | 0.33   | 0.57    | 0.82 | 0.00   | 1.00    | 1.00 | 0.00   | 1.00    | 1.00 | 0.01   | 0.99    | 1.00 |
| Collidextribacter             | -1.75  | 0.14    | 0.31 | -2.25  | 0.05    | 0.32 | -1.51  | 0.20    | 0.87 | -1.51  | 0.20    | 0.87 | -1.39  | 0.26    | 0.83 |
| Collinsella                   | -1.05  | 0.05    | 0.16 | -0.43  | 0.40    | 0.69 | -0.35  | 0.50    | 0.87 | -0.35  | 0.51    | 0.87 | -0.30  | 0.57    | 0.89 |
| Coprobacter                   | 0.02   | 0.97    | 0.99 | -0.29  | 0.60    | 0.84 | -0.62  | 0.28    | 0.87 | -0.63  | 0.28    | 0.87 | -0.61  | 0.29    | 0.83 |
| Coprococcus                   | 1.29   | 0.04    | 0.15 | 1.22   | 0.04    | 0.32 | 1.10   | 0.08    | 0.67 | 1.10   | 0.08    | 0.67 | 1.15   | 0.07    | 0.65 |
| Defluviitaleaceae_UCG.011     | 2.60   | 0.00    | 0.05 | 2.22   | 0.01    | 0.14 | 1.63   | 0.07    | 0.67 | 1.65   | 0.07    | 0.67 | 1.61   | 0.08    | 0.65 |
| Desulfovibrio                 | 0.31   | 0.56    | 0.81 | 0.38   | 0.44    | 0.72 | 0.39   | 0.46    | 0.87 | 0.39   | 0.46    | 0.87 | 0.41   | 0.44    | 0.83 |
| Dialister                     | 0.09   | 0.83    | 0.92 | 0.12   | 0.76    | 0.94 | 0.30   | 0.47    | 0.87 | 0.30   | 0.47    | 0.87 | 0.32   | 0.45    | 0.83 |
| DNF00809                      | 1.72   | 0.09    | 0.22 | 1.46   | 0.14    | 0.43 | 1.33   | 0.19    | 0.87 | 1.33   | 0.19    | 0.87 | 1.35   | 0.19    | 0.83 |
| Dorea                         | -0.01  | 0.99    | 0.99 | 0.17   | 0.82    | 0.95 | 0.28   | 0.72    | 0.93 | 0.28   | 0.72    | 0.93 | 0.25   | 0.75    | 0.96 |
| DTU089                        | 0.82   | 0.33    | 0.53 | 0.63   | 0.43    | 0.72 | 0.40   | 0.63    | 0.93 | 0.40   | 0.63    | 0.93 | 0.42   | 0.62    | 0.93 |
| Eggerthella                   | 0.28   | 0.72    | 0.87 | 0.11   | 0.89    | 0.96 | 0.60   | 0.45    | 0.87 | 0.60   | 0.45    | 0.87 | 0.67   | 0.41    | 0.83 |
| Eisenbergiella                | 0.05   | 0.96    | 0.99 | 0.07   | 0.93    | 0.96 | 0.36   | 0.65    | 0.93 | 0.37   | 0.65    | 0.93 | 0.46   | 0.57    | 0.89 |
| Erysipelatoclostridium        | -0.18  | 0.83    | 0.92 | -0.12  | 0.88    | 0.96 | 0.51   | 0.55    | 0.89 | 0.51   | 0.55    | 0.89 | 0.54   | 0.53    | 0.86 |
| Erysipelotrichaceae_UCG.003   | 0.64   | 0.31    | 0.51 | 0.52   | 0.38    | 0.69 | 0.02   | 0.97    | 1.00 | 0.02   | 0.98    | 1.00 | 0.05   | 0.94    | 0.98 |
| Escherichia.Shigella          | 0.02   | 0.97    | 0.99 | 0.41   | 0.45    | 0.72 | 0.57   | 0.32    | 0.87 | 0.57   | 0.32    | 0.87 | 0.54   | 0.36    | 0.83 |
| Faecalibacterium              | 1.79   | 0.03    | 0.13 | 1.39   | 0.08    | 0.35 | 0.92   | 0.27    | 0.87 | 0.92   | 0.27    | 0.87 | 1.00   | 0.23    | 0.83 |
| Family_XIII_AD3011_group      | 2.29   | 0.00    | 0.05 | 1.64   | 0.03    | 0.26 | 1.19   | 0.13    | 0.77 | 1.21   | 0.13    | 0.76 | 1.27   | 0.11    | 0.77 |
| Family_XIII_UCG.001           | 1.61   | 0.09    | 0.22 | 1.16   | 0.20    | 0.51 | 0.49   | 0.61    | 0.93 | 0.49   | 0.61    | 0.93 | 0.51   | 0.60    | 0.91 |
| FD2005                        | 0.34   | 0.72    | 0.87 | 0.66   | 0.45    | 0.72 | 0.70   | 0.44    | 0.87 | 0.70   | 0.44    | 0.87 | 0.70   | 0.45    | 0.83 |
| Flavonifractor                | -0.94  | 0.25    | 0.44 | -0.88  | 0.25    | 0.62 | -0.19  | 0.82    | 0.94 | -0.19  | 0.82    | 0.94 | -0.19  | 0.82    | 0.96 |
| Fournierella                  | 1.20   | 0.17    | 0.35 | 1.07   | 0.20    | 0.51 | 0.25   | 0.77    | 0.93 | 0.25   | 0.78    | 0.93 | 0.38   | 0.67    | 0.95 |
| Fringicoccus                  | -0.84  | 0.21    | 0.40 | -1.07  | 0.09    | 0.35 | -1.02  | 0.12    | 0.75 | -1.03  | 0.12    | 0.74 | -0.98  | 0.14    | 0.83 |
| Fuscatenibacter               | 0.29   | 0.65    | 0.83 | -0.03  | 0.96    | 0.97 | -0.23  | 0.72    | 0.93 | -0.23  | 0.72    | 0.93 | -0.18  | 0.78    | 0.96 |
| Fusobacterium                 | -0.90  | 0.35    | 0.56 | -0.43  | 0.64    | 0.88 | 0.40   | 0.68    | 0.93 | 0.40   | 0.68    | 0.93 | 0.30   | 0.76    | 0.96 |
| GCA.900066575                 | 0.90   | 0.30    | 0.50 | 0.19   | 0.82    | 0.95 | -0.61  | 0.48    | 0.87 | -0.62  | 0.47    | 0.87 | -0.69  | 0.43    | 0.83 |
| Gordonibacter                 | 0.22   | 0.81    | 0.91 | -0.16  | 0.85    | 0.95 | -0.36  | 0.67    | 0.93 | -0.38  | 0.67    | 0.93 | -0.40  | 0.65    | 0.95 |
| Granulicatella                | -0.66  | 0.57    | 0.81 | -0.53  | 0.63    | 0.88 | -0.40  | 0.72    | 0.93 | -0.40  | 0.73    | 0.93 | -0.30  | 0.79    | 0.96 |
| Haemophilus                   | 1.24   | 0.05    | 0.16 | 0.95   | 0.12    | 0.40 | 0.75   | 0.24    | 0.87 | 0.75   | 0.24    | 0.87 | 0.84   | 0.19    | 0.83 |
| Harryflintia                  | 0.45   | 0.64    | 0.83 | 0.25   | 0.79    | 0.95 | 0.15   | 0.88    | 0.99 | 0.14   | 0.88    | 1.00 | 0.05   | 0.96    | 1.00 |



|                               |       |      |      |       |      |      |       |      |      |       |      |      |       |      |      |
|-------------------------------|-------|------|------|-------|------|------|-------|------|------|-------|------|------|-------|------|------|
| Holdemanella                  | 0.22  | 0.74 | 0.88 | 0.41  | 0.51 | 0.75 | 0.52  | 0.42 | 0.87 | 0.52  | 0.42 | 0.87 | 0.52  | 0.42 | 0.83 |
| Holdemania                    | 1.02  | 0.50 | 0.75 | 1.04  | 0.47 | 0.74 | 1.54  | 0.31 | 0.87 | 1.54  | 0.31 | 0.87 | 1.34  | 0.38 | 0.83 |
| Hungatella                    | -0.36 | 0.65 | 0.83 | -0.10 | 0.90 | 0.96 | 0.49  | 0.54 | 0.89 | 0.48  | 0.54 | 0.89 | 0.59  | 0.46 | 0.83 |
| Hydrogenoanaerobacterium      | 1.89  | 0.03 | 0.13 | 1.07  | 0.20 | 0.51 | 0.56  | 0.52 | 0.88 | 0.57  | 0.52 | 0.88 | 0.63  | 0.47 | 0.83 |
| Incertae_Sedis                | 2.80  | 0.03 | 0.14 | 2.97  | 0.02 | 0.21 | 3.04  | 0.02 | 0.45 | 3.04  | 0.02 | 0.45 | 3.06  | 0.02 | 0.41 |
| Intestinibacter               | 0.94  | 0.22 | 0.40 | 1.36  | 0.06 | 0.35 | 1.41  | 0.06 | 0.67 | 1.43  | 0.06 | 0.67 | 1.56  | 0.04 | 0.58 |
| Intestinimonas                | 1.57  | 0.03 | 0.13 | 0.95  | 0.16 | 0.48 | 0.53  | 0.46 | 0.87 | 0.53  | 0.46 | 0.87 | 0.58  | 0.42 | 0.83 |
| Lachnoclostridium             | -4.19 | 0.01 | 0.05 | -3.00 | 0.04 | 0.32 | -1.24 | 0.42 | 0.87 | -1.24 | 0.42 | 0.87 | -1.33 | 0.39 | 0.83 |
| Lachnospira                   | 3.25  | 0.00 | 0.00 | 2.35  | 0.00 | 0.04 | 1.65  | 0.03 | 0.50 | 1.66  | 0.03 | 0.50 | 1.74  | 0.02 | 0.41 |
| Lachnospiraceae_FCS020_group  | 3.70  | 0.00 | 0.00 | 2.89  | 0.00 | 0.01 | 2.62  | 0.00 | 0.10 | 2.62  | 0.00 | 0.10 | 2.67  | 0.00 | 0.09 |
| Lachnospiraceae_ND3007_group  | 0.26  | 0.62 | 0.83 | -0.20 | 0.69 | 0.92 | -0.50 | 0.34 | 0.87 | -0.50 | 0.34 | 0.87 | -0.45 | 0.40 | 0.83 |
| Lachnospiraceae_NK4A136_group | 1.41  | 0.06 | 0.18 | 0.61  | 0.40 | 0.69 | -0.19 | 0.81 | 0.94 | -0.19 | 0.81 | 0.94 | -0.14 | 0.86 | 0.97 |
| Lachnospiraceae_UCG.001       | 1.62  | 0.00 | 0.05 | 1.37  | 0.01 | 0.14 | 1.14  | 0.04 | 0.64 | 1.15  | 0.04 | 0.64 | 1.20  | 0.03 | 0.52 |
| Lachnospiraceae_UCG.004       | 1.41  | 0.02 | 0.12 | 1.12  | 0.06 | 0.35 | 0.89  | 0.15 | 0.83 | 0.90  | 0.15 | 0.82 | 0.85  | 0.18 | 0.83 |
| Lachnospiraceae_UCG.010       | 0.32  | 0.72 | 0.87 | -0.28 | 0.74 | 0.94 | -0.46 | 0.60 | 0.93 | -0.47 | 0.59 | 0.93 | -0.52 | 0.56 | 0.89 |
| Lactobacillus                 | -1.35 | 0.06 | 0.18 | -0.60 | 0.39 | 0.69 | -0.87 | 0.24 | 0.87 | -0.87 | 0.24 | 0.87 | -0.76 | 0.32 | 0.83 |
| Lactococcus                   | 0.49  | 0.62 | 0.83 | 0.17  | 0.85 | 0.95 | 0.05  | 0.96 | 1.00 | 0.05  | 0.96 | 1.00 | 0.01  | 0.99 | 1.00 |
| Marvinbryantia                | 1.09  | 0.06 | 0.18 | 0.74  | 0.19 | 0.51 | 0.36  | 0.54 | 0.89 | 0.36  | 0.54 | 0.89 | 0.40  | 0.51 | 0.84 |
| Megasphaera                   | -0.21 | 0.68 | 0.86 | 0.33  | 0.50 | 0.75 | 0.62  | 0.24 | 0.87 | 0.62  | 0.24 | 0.87 | 0.61  | 0.26 | 0.83 |
| Monoglobus                    | 2.25  | 0.00 | 0.05 | 1.88  | 0.01 | 0.14 | 1.21  | 0.12 | 0.75 | 1.22  | 0.12 | 0.74 | 1.32  | 0.09 | 0.66 |
| Moryella                      | 2.38  | 0.02 | 0.12 | 1.68  | 0.08 | 0.35 | 0.77  | 0.45 | 0.87 | 0.77  | 0.45 | 0.87 | 0.83  | 0.42 | 0.83 |
| Negativibacillus              | -0.64 | 0.31 | 0.51 | -0.53 | 0.38 | 0.69 | -0.53 | 0.40 | 0.87 | -0.53 | 0.40 | 0.87 | -0.55 | 0.38 | 0.83 |
| NK4A214_group                 | 0.80  | 0.11 | 0.25 | 0.45  | 0.34 | 0.69 | 0.05  | 0.93 | 1.00 | 0.05  | 0.93 | 1.00 | 0.13  | 0.80 | 0.96 |
| Odoribacter                   | 0.32  | 0.51 | 0.75 | 0.11  | 0.81 | 0.95 | -0.20 | 0.68 | 0.93 | -0.20 | 0.68 | 0.93 | -0.22 | 0.66 | 0.95 |
| Oscillibacter                 | 1.96  | 0.02 | 0.12 | 1.61  | 0.04 | 0.32 | 1.47  | 0.08 | 0.67 | 1.48  | 0.08 | 0.67 | 1.53  | 0.07 | 0.65 |
| Oscillospira                  | 0.19  | 0.87 | 0.94 | 0.27  | 0.80 | 0.95 | 0.89  | 0.43 | 0.87 | 0.89  | 0.43 | 0.87 | 0.99  | 0.39 | 0.83 |
| Oxalobacter                   | 2.31  | 0.01 | 0.05 | 1.37  | 0.09 | 0.35 | 1.11  | 0.19 | 0.87 | 1.11  | 0.19 | 0.87 | 1.11  | 0.19 | 0.83 |
| Paludicola                    | 2.09  | 0.01 | 0.10 | 1.32  | 0.11 | 0.38 | 0.64  | 0.45 | 0.87 | 0.65  | 0.45 | 0.87 | 0.81  | 0.36 | 0.83 |
| Parabacteroides               | -0.44 | 0.47 | 0.71 | -0.07 | 0.90 | 0.96 | 0.06  | 0.92 | 1.00 | 0.06  | 0.92 | 1.00 | 0.07  | 0.91 | 0.97 |
| Paraprevotella                | -0.62 | 0.16 | 0.33 | -0.43 | 0.31 | 0.69 | -0.36 | 0.43 | 0.87 | -0.36 | 0.42 | 0.87 | -0.32 | 0.47 | 0.83 |
| Parasutterella                | 0.80  | 0.08 | 0.21 | 0.65  | 0.13 | 0.43 | 0.37  | 0.42 | 0.87 | 0.38  | 0.42 | 0.87 | 0.33  | 0.48 | 0.83 |
| Peptococcus                   | 1.47  | 0.10 | 0.23 | 0.84  | 0.33 | 0.69 | 0.60  | 0.50 | 0.87 | 0.60  | 0.51 | 0.87 | 0.70  | 0.44 | 0.83 |
| Phascolarctobacterium         | 0.02  | 0.97 | 0.99 | 0.08  | 0.85 | 0.95 | 0.03  | 0.94 | 1.00 | 0.03  | 0.95 | 1.00 | 0.00  | 1.00 | 1.00 |
| Phocea                        | 0.33  | 0.76 | 0.89 | 0.03  | 0.98 | 0.98 | 0.34  | 0.75 | 0.93 | 0.34  | 0.75 | 0.93 | 0.35  | 0.75 | 0.96 |
| Prevotella                    | -0.82 | 0.04 | 0.15 | -0.53 | 0.17 | 0.48 | -0.54 | 0.17 | 0.87 | -0.54 | 0.17 | 0.87 | -0.52 | 0.19 | 0.83 |
| Romboutsia                    | 0.12  | 0.87 | 0.94 | 0.38  | 0.57 | 0.82 | 0.21  | 0.77 | 0.93 | 0.21  | 0.76 | 0.93 | 0.30  | 0.67 | 0.95 |
| Roseburia                     | 1.63  | 0.05 | 0.16 | 1.38  | 0.08 | 0.35 | 0.72  | 0.38 | 0.87 | 0.72  | 0.38 | 0.87 | 0.77  | 0.36 | 0.83 |
| Ruminococcus                  | 1.37  | 0.01 | 0.07 | 0.92  | 0.07 | 0.35 | 0.46  | 0.39 | 0.87 | 0.46  | 0.39 | 0.87 | 0.57  | 0.30 | 0.83 |
| Sellimonas                    | 0.94  | 0.21 | 0.40 | 0.64  | 0.37 | 0.69 | 0.53  | 0.48 | 0.87 | 0.53  | 0.48 | 0.87 | 0.55  | 0.47 | 0.83 |
| Senegalimassilia              | 0.35  | 0.63 | 0.83 | 0.38  | 0.57 | 0.82 | -0.17 | 0.81 | 0.94 | -0.17 | 0.81 | 0.94 | -0.13 | 0.85 | 0.97 |
| Shuttleworthia                | 1.23  | 0.12 | 0.26 | 0.26  | 0.74 | 0.94 | 0.01  | 0.99 | 1.00 | 0.00  | 1.00 | 1.00 | 0.10  | 0.90 | 0.97 |
| Slackia                       | -0.72 | 0.25 | 0.45 | -0.54 | 0.37 | 0.69 | -0.72 | 0.25 | 0.87 | -0.72 | 0.25 | 0.87 | -0.80 | 0.21 | 0.83 |
| Streptococcus                 | 0.97  | 0.29 | 0.50 | 0.92  | 0.29 | 0.68 | 0.68  | 0.46 | 0.87 | 0.68  | 0.46 | 0.87 | 0.86  | 0.36 | 0.83 |
| Subdoligranulum               | 1.46  | 0.03 | 0.13 | 1.08  | 0.10 | 0.36 | 0.57  | 0.40 | 0.87 | 0.56  | 0.40 | 0.87 | 0.58  | 0.40 | 0.83 |
| Sutterella                    | -1.07 | 0.01 | 0.07 | -0.71 | 0.07 | 0.35 | -0.70 | 0.08 | 0.67 | -0.70 | 0.08 | 0.67 | -0.70 | 0.08 | 0.65 |
| TM7x                          | 0.45  | 0.64 | 0.83 | -0.10 | 0.91 | 0.96 | -0.02 | 0.98 | 1.00 | -0.02 | 0.98 | 1.00 | 0.19  | 0.84 | 0.97 |
| Turcibacter                   | -0.11 | 0.91 | 0.97 | 0.42  | 0.65 | 0.88 | 0.34  | 0.72 | 0.93 | 0.34  | 0.72 | 0.93 | 0.23  | 0.81 | 0.96 |
| Tuzzerella                    | -1.38 | 0.04 | 0.14 | -1.18 | 0.06 | 0.35 | -0.89 | 0.17 | 0.87 | -0.89 | 0.17 | 0.87 | -0.95 | 0.15 | 0.83 |
| UBA1819                       | 0.05  | 0.96 | 0.99 | -0.10 | 0.92 | 0.96 | 0.42  | 0.67 | 0.93 | 0.42  | 0.68 | 0.93 | 0.35  | 0.74 | 0.96 |
| UCG.002                       | 0.85  | 0.08 | 0.21 | 0.44  | 0.35 | 0.69 | 0.07  | 0.89 | 1.00 | 0.06  | 0.90 | 1.00 | 0.06  | 0.90 | 0.97 |
| UCG.003                       | 1.01  | 0.06 | 0.18 | 0.52  | 0.32 | 0.69 | 0.16  | 0.77 | 0.93 | 0.16  | 0.77 | 0.93 | 0.18  | 0.75 | 0.96 |
| UCG.005                       | 1.40  | 0.02 | 0.12 | 0.97  | 0.09 | 0.36 | 0.23  | 0.71 | 0.93 | 0.23  | 0.71 | 0.93 | 0.30  | 0.64 | 0.95 |
| UCG.009                       | 1.59  | 0.09 | 0.22 | 0.75  | 0.40 | 0.69 | 0.08  | 0.93 | 1.00 | 0.08  | 0.93 | 1.00 | 0.15  | 0.88 | 0.97 |
| Veillonella                   | 1.01  | 0.13 | 0.28 | 0.98  | 0.12 | 0.40 | 0.78  | 0.24 | 0.87 | 0.78  | 0.24 | 0.87 | 0.89  | 0.19 | 0.83 |
| Victivallis                   | 1.93  | 0.00 | 0.05 | 1.50  | 0.02 | 0.21 | 1.19  | 0.08 | 0.67 | 1.19  | 0.08 | 0.67 | 1.27  | 0.06 | 0.65 |

Multivariable-adjusted regression models adjusted for:

Model 1: sequencing batch, age, race, gender, study center

Model 2: Model 1, with education

Model 3: Model 2, with physical activity, diet score, medication use, and smoking

Model 4: Model 3 with BMI

Model 5: Model 4 with hypertension and diabetes

eTable 13: Multivariable-adjusted regression coefficients, p-values, and false discovery rate (FDR)-adjusted p-values for genera with respect to Stroop.

|                               | Model1 |         |      | Model2 |         |      | Model3 |         |      | Model4 |         |      | Model5 |         |      |
|-------------------------------|--------|---------|------|--------|---------|------|--------|---------|------|--------|---------|------|--------|---------|------|
|                               | beta   | p-value | FDR  | beta   | p-value | FDR  | beta   | p-value | FDR  | beta   | p-value | FDR  | beta   | p-value | FDR  |
| Acetanaerobacterium           | 0.04   | 0.97    | 1.00 | -0.17  | 0.86    | 0.94 | 0.18   | 0.85    | 0.97 | 0.20   | 0.84    | 0.97 | 0.13   | 0.90    | 0.96 |
| Acidaminococcus               | 0.41   | 0.18    | 0.51 | 0.26   | 0.41    | 0.81 | -0.06  | 0.85    | 0.97 | -0.07  | 0.84    | 0.97 | -0.07  | 0.83    | 0.96 |
| Actinomyces                   | -0.23  | 0.79    | 0.94 | -0.36  | 0.67    | 0.89 | -1.11  | 0.20    | 0.94 | -1.11  | 0.20    | 0.94 | -1.11  | 0.21    | 0.94 |
| Adlercreutzia                 | 0.10   | 0.85    | 0.96 | 0.14   | 0.79    | 0.94 | 0.21   | 0.68    | 0.97 | 0.22   | 0.67    | 0.95 | 0.22   | 0.68    | 0.94 |
| Agathobacter                  | -0.43  | 0.50    | 0.80 | -0.38  | 0.55    | 0.89 | 0.23   | 0.71    | 0.97 | 0.21   | 0.74    | 0.97 | 0.17   | 0.79    | 0.96 |
| Akkermansia                   | -0.45  | 0.17    | 0.51 | -0.35  | 0.29    | 0.74 | -0.24  | 0.48    | 0.94 | -0.24  | 0.48    | 0.94 | -0.24  | 0.48    | 0.94 |
| Alistipes                     | -0.36  | 0.50    | 0.80 | -0.25  | 0.64    | 0.89 | 0.04   | 0.93    | 0.97 | 0.05   | 0.93    | 0.97 | 0.03   | 0.95    | 0.97 |
| Allisonella                   | 1.03   | 0.11    | 0.48 | 0.64   | 0.32    | 0.78 | 0.55   | 0.41    | 0.94 | 0.54   | 0.42    | 0.94 | 0.58   | 0.39    | 0.94 |
| Anaerofilum                   | 0.03   | 0.97    | 1.00 | 0.38   | 0.60    | 0.89 | 0.40   | 0.58    | 0.94 | 0.42   | 0.57    | 0.94 | 0.39   | 0.60    | 0.94 |
| Anaerostipes                  | 0.04   | 0.96    | 1.00 | 0.22   | 0.78    | 0.94 | 0.48   | 0.54    | 0.94 | 0.48   | 0.54    | 0.94 | 0.41   | 0.61    | 0.94 |
| Anaerotruncus                 | -0.20  | 0.76    | 0.91 | -0.09  | 0.89    | 0.96 | 0.26   | 0.69    | 0.97 | 0.30   | 0.66    | 0.95 | 0.21   | 0.76    | 0.95 |
| Bacteroides                   | -1.03  | 0.38    | 0.78 | -0.88  | 0.45    | 0.84 | -0.71  | 0.53    | 0.94 | -0.74  | 0.52    | 0.94 | -0.66  | 0.57    | 0.94 |
| Barnesiella                   | -0.64  | 0.04    | 0.32 | -0.65  | 0.03    | 0.35 | -0.59  | 0.06    | 0.94 | -0.59  | 0.06    | 0.94 | -0.63  | 0.05    | 0.94 |
| Bifidobacterium               | -0.30  | 0.46    | 0.80 | -0.48  | 0.24    | 0.70 | -0.41  | 0.30    | 0.94 | -0.42  | 0.29    | 0.94 | -0.42  | 0.31    | 0.94 |
| Bilophila                     | -0.47  | 0.27    | 0.64 | -0.38  | 0.36    | 0.78 | -0.28  | 0.51    | 0.94 | -0.28  | 0.50    | 0.94 | -0.26  | 0.54    | 0.94 |
| Blautia                       | -0.97  | 0.50    | 0.80 | -0.69  | 0.63    | 0.89 | -0.82  | 0.56    | 0.94 | -0.81  | 0.57    | 0.94 | -1.14  | 0.44    | 0.94 |
| Butyricoccus                  | -0.76  | 0.45    | 0.80 | -0.29  | 0.77    | 0.94 | 0.56   | 0.57    | 0.94 | 0.55   | 0.58    | 0.94 | 0.54   | 0.60    | 0.94 |
| Butyricimonas                 | -0.68  | 0.06    | 0.39 | -0.60  | 0.09    | 0.62 | -0.45  | 0.21    | 0.94 | -0.45  | 0.21    | 0.94 | -0.46  | 0.21    | 0.94 |
| CAG.56                        | -0.60  | 0.14    | 0.51 | -0.49  | 0.23    | 0.70 | -0.10  | 0.82    | 0.97 | -0.10  | 0.82    | 0.97 | -0.14  | 0.75    | 0.95 |
| Candidatus_Soleaferrea        | 0.30   | 0.72    | 0.90 | 0.44   | 0.60    | 0.89 | 0.02   | 0.98    | 0.98 | 0.02   | 0.98    | 0.98 | -0.05  | 0.96    | 0.97 |
| Caproiciproducens             | -0.76  | 0.28    | 0.64 | -0.76  | 0.28    | 0.73 | -0.40  | 0.57    | 0.94 | -0.40  | 0.58    | 0.94 | -0.45  | 0.54    | 0.94 |
| Christensenellaceae_R.7_group | -1.15  | 0.00    | 0.07 | -1.03  | 0.00    | 0.15 | -0.74  | 0.04    | 0.94 | -0.74  | 0.04    | 0.94 | -0.79  | 0.03    | 0.94 |
| Clostridium_sensu_stricto_1   | 0.21   | 0.63    | 0.87 | 0.16   | 0.72    | 0.92 | 0.23   | 0.60    | 0.94 | 0.23   | 0.60    | 0.94 | 0.23   | 0.60    | 0.94 |
| Colidextribacter              | 0.02   | 0.98    | 1.00 | 0.21   | 0.81    | 0.94 | -0.14  | 0.88    | 0.97 | -0.13  | 0.88    | 0.97 | -0.33  | 0.72    | 0.95 |
| Collinsella                   | 0.05   | 0.89    | 0.99 | -0.17  | 0.67    | 0.89 | -0.06  | 0.89    | 0.97 | -0.06  | 0.87    | 0.97 | -0.04  | 0.92    | 0.97 |
| Coprobacter                   | 0.09   | 0.84    | 0.96 | 0.19   | 0.65    | 0.89 | 0.44   | 0.30    | 0.94 | 0.45   | 0.29    | 0.94 | 0.45   | 0.29    | 0.94 |
| Coprococcus                   | -0.17  | 0.72    | 0.90 | -0.16  | 0.74    | 0.92 | -0.12  | 0.80    | 0.97 | -0.12  | 0.80    | 0.97 | -0.16  | 0.74    | 0.95 |
| Defluviitaleaceae_UCG.011     | -1.94  | 0.00    | 0.07 | -1.82  | 0.01    | 0.16 | -1.49  | 0.03    | 0.94 | -1.49  | 0.03    | 0.94 | -1.60  | 0.02    | 0.94 |
| Desulfovibrio                 | -0.17  | 0.66    | 0.88 | -0.19  | 0.61    | 0.89 | -0.12  | 0.75    | 0.97 | -0.11  | 0.78    | 0.97 | -0.17  | 0.67    | 0.94 |
| Dialister                     | 0.19   | 0.52    | 0.80 | 0.18   | 0.54    | 0.89 | 0.25   | 0.42    | 0.94 | 0.24   | 0.43    | 0.94 | 0.24   | 0.44    | 0.94 |
| DNF00809                      | -1.02  | 0.17    | 0.51 | -0.94  | 0.21    | 0.70 | -1.14  | 0.13    | 0.94 | -1.13  | 0.14    | 0.94 | -1.15  | 0.13    | 0.94 |
| Dorea                         | -0.91  | 0.12    | 0.48 | -0.96  | 0.10    | 0.62 | -0.97  | 0.09    | 0.94 | -0.98  | 0.09    | 0.94 | -0.95  | 0.11    | 0.94 |
| DTU089                        | -0.22  | 0.73    | 0.90 | -0.16  | 0.80    | 0.94 | -0.09  | 0.88    | 0.97 | -0.08  | 0.90    | 0.97 | -0.17  | 0.79    | 0.96 |
| Eggerthella                   | 0.61   | 0.30    | 0.65 | 0.68   | 0.24    | 0.70 | 0.28   | 0.63    | 0.94 | 0.29   | 0.62    | 0.94 | 0.28   | 0.64    | 0.94 |
| Eisenbergiella                | -0.24  | 0.69    | 0.90 | -0.25  | 0.68    | 0.89 | -0.59  | 0.32    | 0.94 | -0.58  | 0.34    | 0.94 | -0.59  | 0.33    | 0.94 |
| Erysipelatoclostridium        | -0.04  | 0.96    | 1.00 | -0.06  | 0.92    | 0.96 | -0.34  | 0.60    | 0.94 | -0.32  | 0.61    | 0.94 | -0.32  | 0.61    | 0.94 |
| Erysipelotrichaceae_UCG.003   | -0.59  | 0.19    | 0.51 | -0.54  | 0.23    | 0.70 | -0.32  | 0.49    | 0.94 | -0.31  | 0.50    | 0.94 | -0.35  | 0.45    | 0.94 |
| Escherichia.Shigella          | 0.21   | 0.61    | 0.86 | 0.08   | 0.84    | 0.94 | -0.02  | 0.96    | 0.97 | -0.03  | 0.95    | 0.97 | -0.01  | 0.99    | 0.99 |
| Faecalibacterium              | -1.94  | 0.00    | 0.07 | -1.80  | 0.00    | 0.15 | -1.56  | 0.01    | 0.94 | -1.57  | 0.01    | 0.94 | -1.65  | 0.01    | 0.89 |
| Family_XIII_AD3011_group      | -0.93  | 0.10    | 0.48 | -0.70  | 0.21    | 0.70 | -0.08  | 0.89    | 0.97 | -0.06  | 0.92    | 0.97 | -0.12  | 0.85    | 0.96 |
| Family_XIII_UCG.001           | -0.94  | 0.18    | 0.51 | -0.77  | 0.27    | 0.73 | -0.47  | 0.51    | 0.94 | -0.45  | 0.53    | 0.94 | -0.53  | 0.46    | 0.94 |
| FD2005                        | -0.61  | 0.36    | 0.76 | -0.72  | 0.28    | 0.73 | -0.36  | 0.59    | 0.94 | -0.37  | 0.59    | 0.94 | -0.44  | 0.52    | 0.94 |
| Flavonifractor                | 0.31   | 0.60    | 0.86 | 0.28   | 0.63    | 0.89 | -0.30  | 0.62    | 0.94 | -0.30  | 0.61    | 0.94 | -0.34  | 0.58    | 0.94 |
| Fournierella                  | -0.35  | 0.58    | 0.86 | -0.31  | 0.63    | 0.89 | 0.17   | 0.79    | 0.97 | 0.19   | 0.77    | 0.97 | 0.10   | 0.87    | 0.96 |
| Frisingicoccus                | 0.32   | 0.51    | 0.80 | 0.40   | 0.40    | 0.81 | 0.53   | 0.27    | 0.94 | 0.55   | 0.26    | 0.94 | 0.56   | 0.25    | 0.94 |
| Fusicatenibacter              | -0.54  | 0.26    | 0.64 | -0.43  | 0.36    | 0.78 | -0.36  | 0.46    | 0.94 | -0.38  | 0.44    | 0.94 | -0.39  | 0.43    | 0.94 |
| Fusobacterium                 | 1.35   | 0.06    | 0.39 | 1.18   | 0.09    | 0.62 | 0.93   | 0.19    | 0.94 | 0.95   | 0.18    | 0.94 | 0.90   | 0.21    | 0.94 |
| GCA.900066575                 | -1.33  | 0.03    | 0.32 | -1.09  | 0.08    | 0.62 | -0.64  | 0.31    | 0.94 | -0.63  | 0.32    | 0.94 | -0.73  | 0.26    | 0.94 |
| Gordonibacter                 | 0.16   | 0.80    | 0.94 | 0.28   | 0.66    | 0.89 | 0.52   | 0.42    | 0.94 | 0.55   | 0.39    | 0.94 | 0.56   | 0.39    | 0.94 |
| Granulicatella                | -0.11  | 0.89    | 0.99 | -0.18  | 0.83    | 0.94 | -0.61  | 0.47    | 0.94 | -0.62  | 0.47    | 0.94 | -0.61  | 0.48    | 0.94 |
| Haemophilus                   | -0.51  | 0.27    | 0.64 | -0.41  | 0.37    | 0.78 | -0.32  | 0.50    | 0.94 | -0.32  | 0.50    | 0.94 | -0.36  | 0.45    | 0.94 |
| Harryflintia                  | -0.36  | 0.62    | 0.86 | -0.29  | 0.68    | 0.89 | 0.04   | 0.96    | 0.97 | 0.05   | 0.94    | 0.97 | -0.06  | 0.93    | 0.97 |

|                               |       |      |      |       |      |      |       |      |      |       |      |      |       |      |      |
|-------------------------------|-------|------|------|-------|------|------|-------|------|------|-------|------|------|-------|------|------|
| Holdemanela                   | 0.03  | 0.96 | 1.00 | -0.04 | 0.92 | 0.96 | 0.16  | 0.73 | 0.97 | 0.16  | 0.74 | 0.97 | 0.17  | 0.72 | 0.95 |
| Holdemania                    | -0.18 | 0.87 | 0.98 | -0.20 | 0.86 | 0.94 | -0.57 | 0.61 | 0.94 | -0.55 | 0.62 | 0.94 | -0.62 | 0.58 | 0.94 |
| Hungatella                    | 0.90  | 0.12 | 0.48 | 0.82  | 0.15 | 0.70 | 0.24  | 0.68 | 0.97 | 0.25  | 0.67 | 0.95 | 0.26  | 0.66 | 0.94 |
| Hydrogenoanaerobacterium      | -1.40 | 0.03 | 0.28 | -1.14 | 0.07 | 0.62 | -0.93 | 0.15 | 0.94 | -0.92 | 0.15 | 0.94 | -0.94 | 0.15 | 0.94 |
| Incertae_Sedis                | -0.80 | 0.41 | 0.80 | -0.86 | 0.37 | 0.78 | -0.93 | 0.34 | 0.94 | -0.92 | 0.35 | 0.94 | -1.00 | 0.31 | 0.94 |
| Intestinibacter               | -0.56 | 0.32 | 0.68 | -0.70 | 0.21 | 0.70 | -0.71 | 0.21 | 0.94 | -0.74 | 0.19 | 0.94 | -0.74 | 0.20 | 0.94 |
| Intestinimonas                | -0.72 | 0.17 | 0.51 | -0.52 | 0.32 | 0.78 | -0.37 | 0.49 | 0.94 | -0.35 | 0.51 | 0.94 | -0.39 | 0.48 | 0.94 |
| Lachnoclostridium             | 2.85  | 0.01 | 0.14 | 2.47  | 0.03 | 0.35 | 1.79  | 0.11 | 0.94 | 1.77  | 0.12 | 0.94 | 1.88  | 0.10 | 0.94 |
| Lachnospira                   | -1.65 | 0.00 | 0.07 | -1.36 | 0.01 | 0.29 | -1.01 | 0.07 | 0.94 | -1.03 | 0.07 | 0.94 | -1.15 | 0.04 | 0.94 |
| Lachnospiraceae_FCS020_group  | -1.50 | 0.01 | 0.14 | -1.23 | 0.03 | 0.35 | -0.63 | 0.29 | 0.94 | -0.62 | 0.29 | 0.94 | -0.63 | 0.30 | 0.94 |
| Lachnospiraceae_ND3007_group  | -0.29 | 0.45 | 0.80 | -0.13 | 0.73 | 0.92 | 0.11  | 0.77 | 0.97 | 0.11  | 0.79 | 0.97 | 0.07  | 0.87 | 0.96 |
| Lachnospiraceae_NK4A136_group | 0.00  | 0.99 | 1.00 | 0.29  | 0.60 | 0.89 | 1.04  | 0.07 | 0.94 | 1.03  | 0.07 | 0.94 | 0.97  | 0.10 | 0.94 |
| Lachnospiraceae_UCG.001       | -0.58 | 0.16 | 0.51 | -0.50 | 0.22 | 0.70 | -0.06 | 0.88 | 0.97 | -0.05 | 0.90 | 0.97 | -0.09 | 0.84 | 0.96 |
| Lachnospiraceae_UCG.004       | -0.17 | 0.71 | 0.90 | -0.06 | 0.90 | 0.96 | 0.12  | 0.79 | 0.97 | 0.11  | 0.80 | 0.97 | 0.14  | 0.76 | 0.95 |
| Lachnospiraceae_UCG.010       | -0.20 | 0.76 | 0.91 | 0.02  | 0.97 | 0.98 | 0.57  | 0.38 | 0.94 | 0.58  | 0.37 | 0.94 | 0.60  | 0.36 | 0.94 |
| Lactobacillus                 | 0.29  | 0.59 | 0.86 | 0.01  | 0.98 | 0.98 | -0.04 | 0.94 | 0.97 | -0.06 | 0.91 | 0.97 | 0.02  | 0.97 | 0.98 |
| Lactococcus                   | -0.25 | 0.73 | 0.90 | -0.14 | 0.84 | 0.94 | 0.31  | 0.68 | 0.97 | 0.32  | 0.66 | 0.95 | 0.42  | 0.56 | 0.94 |
| Marvinbryantia                | 0.02  | 0.97 | 1.00 | 0.15  | 0.73 | 0.92 | 0.41  | 0.35 | 0.94 | 0.42  | 0.34 | 0.94 | 0.37  | 0.40 | 0.94 |
| Megasphaera                   | 0.20  | 0.59 | 0.86 | 0.01  | 0.98 | 0.98 | -0.41 | 0.30 | 0.94 | -0.41 | 0.29 | 0.94 | -0.34 | 0.39 | 0.94 |
| Monoglobus                    | -1.73 | 0.00 | 0.07 | -1.61 | 0.00 | 0.15 | -0.72 | 0.21 | 0.94 | -0.71 | 0.22 | 0.94 | -0.81 | 0.17 | 0.94 |
| Moryella                      | -1.08 | 0.14 | 0.51 | -0.83 | 0.26 | 0.73 | -0.04 | 0.96 | 0.97 | -0.04 | 0.96 | 0.97 | -0.10 | 0.90 | 0.96 |
| Negativibacillus              | -0.20 | 0.67 | 0.89 | -0.23 | 0.62 | 0.89 | -0.41 | 0.38 | 0.94 | -0.41 | 0.38 | 0.94 | -0.41 | 0.38 | 0.94 |
| NK4A214_group                 | -0.58 | 0.11 | 0.48 | -0.46 | 0.21 | 0.70 | -0.12 | 0.76 | 0.97 | -0.11 | 0.77 | 0.97 | -0.15 | 0.69 | 0.94 |
| Odoribacter                   | 0.00  | 1.00 | 1.00 | 0.07  | 0.85 | 0.94 | 0.20  | 0.57 | 0.94 | 0.21  | 0.57 | 0.94 | 0.15  | 0.68 | 0.94 |
| Oscillibacter                 | -1.09 | 0.08 | 0.41 | -0.97 | 0.11 | 0.62 | -0.81 | 0.19 | 0.94 | -0.80 | 0.20 | 0.94 | -0.83 | 0.19 | 0.94 |
| Oscillospira                  | -0.62 | 0.47 | 0.80 | -0.65 | 0.44 | 0.84 | -0.87 | 0.30 | 0.94 | -0.86 | 0.31 | 0.94 | -1.04 | 0.23 | 0.94 |
| Oxalobacter                   | -0.89 | 0.14 | 0.51 | -0.57 | 0.35 | 0.78 | 0.10  | 0.88 | 0.97 | 0.10  | 0.87 | 0.97 | 0.11  | 0.87 | 0.96 |
| Paludicola                    | -1.11 | 0.07 | 0.41 | -0.85 | 0.17 | 0.70 | -0.32 | 0.62 | 0.94 | -0.29 | 0.65 | 0.95 | -0.29 | 0.66 | 0.94 |
| Parabacteroides               | -0.09 | 0.83 | 0.96 | -0.22 | 0.62 | 0.89 | -0.25 | 0.57 | 0.94 | -0.25 | 0.56 | 0.94 | -0.27 | 0.54 | 0.94 |
| Paraprevotella                | 0.23  | 0.47 | 0.80 | 0.17  | 0.60 | 0.89 | 0.16  | 0.63 | 0.94 | 0.17  | 0.61 | 0.94 | 0.18  | 0.59 | 0.94 |
| Parasutterella                | -0.82 | 0.01 | 0.17 | -0.77 | 0.02 | 0.32 | -0.51 | 0.14 | 0.94 | -0.51 | 0.14 | 0.94 | -0.54 | 0.12 | 0.94 |
| Peptococcus                   | -0.71 | 0.28 | 0.64 | -0.50 | 0.44 | 0.84 | 0.03  | 0.96 | 0.97 | 0.05  | 0.94 | 0.97 | 0.09  | 0.90 | 0.96 |
| Phascolarctobacterium         | -0.42 | 0.19 | 0.51 | -0.45 | 0.16 | 0.70 | -0.42 | 0.19 | 0.94 | -0.41 | 0.20 | 0.94 | -0.43 | 0.19 | 0.94 |
| Phocea                        | 1.02  | 0.20 | 0.51 | 1.13  | 0.15 | 0.70 | 1.24  | 0.12 | 0.94 | 1.23  | 0.12 | 0.94 | 1.19  | 0.14 | 0.94 |
| Prevotella                    | 0.55  | 0.06 | 0.39 | 0.44  | 0.13 | 0.66 | 0.33  | 0.27 | 0.94 | 0.32  | 0.27 | 0.94 | 0.28  | 0.34 | 0.94 |
| Romboutsia                    | -0.40 | 0.44 | 0.80 | -0.50 | 0.33 | 0.78 | -0.58 | 0.27 | 0.94 | -0.59 | 0.26 | 0.94 | -0.62 | 0.24 | 0.94 |
| Roseburia                     | -0.42 | 0.49 | 0.80 | -0.33 | 0.57 | 0.89 | -0.06 | 0.92 | 0.97 | -0.07 | 0.91 | 0.97 | -0.18 | 0.77 | 0.95 |
| Ruminococcus                  | -0.40 | 0.30 | 0.65 | -0.25 | 0.51 | 0.89 | 0.05  | 0.90 | 0.97 | 0.05  | 0.89 | 0.97 | 0.03  | 0.94 | 0.97 |
| Sellimonas                    | -0.45 | 0.42 | 0.80 | -0.35 | 0.51 | 0.89 | -0.54 | 0.32 | 0.94 | -0.53 | 0.34 | 0.94 | -0.55 | 0.32 | 0.94 |
| Senegalimassilia              | -0.32 | 0.54 | 0.82 | -0.34 | 0.52 | 0.89 | -0.06 | 0.92 | 0.97 | -0.05 | 0.92 | 0.97 | -0.09 | 0.86 | 0.96 |
| Shuttleworthia                | -1.03 | 0.07 | 0.41 | -0.71 | 0.22 | 0.70 | -0.41 | 0.48 | 0.94 | -0.40 | 0.49 | 0.94 | -0.37 | 0.53 | 0.94 |
| Slackia                       | -0.65 | 0.16 | 0.51 | -0.72 | 0.12 | 0.62 | -0.40 | 0.40 | 0.94 | -0.40 | 0.39 | 0.94 | -0.42 | 0.38 | 0.94 |
| Streptococcus                 | -1.07 | 0.11 | 0.48 | -1.06 | 0.11 | 0.62 | -1.25 | 0.07 | 0.94 | -1.25 | 0.07 | 0.94 | -1.19 | 0.09 | 0.94 |
| Subdoligranulum               | -1.02 | 0.04 | 0.32 | -0.89 | 0.07 | 0.62 | -0.84 | 0.09 | 0.94 | -0.84 | 0.09 | 0.94 | -0.91 | 0.07 | 0.94 |
| Sutterella                    | 0.26  | 0.39 | 0.78 | 0.13  | 0.66 | 0.89 | -0.08 | 0.80 | 0.97 | -0.08 | 0.80 | 0.97 | -0.06 | 0.83 | 0.96 |
| TM7x                          | -0.40 | 0.57 | 0.85 | -0.22 | 0.75 | 0.92 | -0.26 | 0.70 | 0.97 | -0.26 | 0.71 | 0.97 | -0.30 | 0.67 | 0.94 |
| Turicibacter                  | -0.47 | 0.51 | 0.80 | -0.66 | 0.34 | 0.78 | -1.01 | 0.15 | 0.94 | -1.02 | 0.15 | 0.94 | -1.04 | 0.14 | 0.94 |
| Tuzzerella                    | 0.67  | 0.16 | 0.51 | 0.61  | 0.20 | 0.70 | 0.46  | 0.35 | 0.94 | 0.46  | 0.34 | 0.94 | 0.48  | 0.34 | 0.94 |
| UBA1819                       | -0.50 | 0.50 | 0.80 | -0.45 | 0.54 | 0.89 | -1.00 | 0.17 | 0.94 | -0.99 | 0.18 | 0.94 | -1.09 | 0.15 | 0.94 |
| UCG.002                       | -0.16 | 0.64 | 0.87 | -0.01 | 0.97 | 0.98 | 0.32  | 0.38 | 0.94 | 0.34  | 0.36 | 0.94 | 0.28  | 0.45 | 0.94 |
| UCG.003                       | -0.68 | 0.09 | 0.45 | -0.52 | 0.19 | 0.70 | -0.32 | 0.43 | 0.94 | -0.32 | 0.43 | 0.94 | -0.31 | 0.45 | 0.94 |
| UCG.005                       | -1.18 | 0.01 | 0.13 | -1.04 | 0.02 | 0.31 | -0.57 | 0.22 | 0.94 | -0.56 | 0.23 | 0.94 | -0.65 | 0.17 | 0.94 |
| UCG.009                       | -0.88 | 0.20 | 0.51 | -0.60 | 0.38 | 0.79 | -0.22 | 0.75 | 0.97 | -0.21 | 0.76 | 0.97 | -0.28 | 0.69 | 0.94 |
| Veillonella                   | -0.06 | 0.90 | 0.99 | -0.05 | 0.91 | 0.96 | 0.05  | 0.92 | 0.97 | 0.04  | 0.93 | 0.97 | 0.08  | 0.88 | 0.96 |
| Victivallis                   | -0.96 | 0.05 | 0.38 | -0.82 | 0.09 | 0.62 | -0.40 | 0.42 | 0.94 | -0.39 | 0.44 | 0.94 | -0.38 | 0.46 | 0.94 |

Multivariable-adjusted regression models adjusted for:

Model 1: sequencing batch, age, race, gender, study center

Model 2: Model 1, with education

Model 3: Model 2, with physical activity, diet score, medication use, and smoking

Model 4: Model 3 with BMI

Model 5: Model 4 with hypertension and diabetes

Table 14: Multivariable-adjusted regression coefficients, p-values, and false discovery rate (FDR)-adjusted p-values for genera with respect to RAVLT.

|                               | Model1 |         |      | Model2 |         |      | Model3 |         |      | Model4 |         |      | Model5 |         |      |
|-------------------------------|--------|---------|------|--------|---------|------|--------|---------|------|--------|---------|------|--------|---------|------|
|                               | beta   | p-value | FDR  | beta   | p-value | FDR  | beta   | p-value | FDR  | beta   | p-value | FDR  | beta   | p-value | FDR  |
| Acetanaerobacterium           | -0.04  | 0.77    | 0.89 | 0.03   | 0.85    | 0.94 | -0.09  | 0.53    | 0.88 | -0.10  | 0.52    | 0.86 | -0.11  | 0.45    | 0.79 |
| Acidaminococcus               | -0.16  | 0.00    | 0.04 | -0.11  | 0.02    | 0.24 | -0.09  | 0.09    | 0.53 | -0.09  | 0.09    | 0.54 | -0.09  | 0.09    | 0.52 |
| Actinomyces                   | -0.11  | 0.39    | 0.60 | -0.07  | 0.56    | 0.80 | -0.04  | 0.75    | 0.93 | -0.04  | 0.75    | 0.94 | -0.04  | 0.80    | 0.98 |
| Adlercreutzia                 | 0.18   | 0.03    | 0.12 | 0.16   | 0.03    | 0.24 | 0.13   | 0.10    | 0.53 | 0.13   | 0.10    | 0.54 | 0.13   | 0.11    | 0.52 |
| Agathobacter                  | -0.11  | 0.26    | 0.47 | -0.13  | 0.18    | 0.46 | -0.17  | 0.08    | 0.53 | -0.17  | 0.09    | 0.54 | -0.16  | 0.10    | 0.52 |
| Akkermansia                   | 0.10   | 0.05    | 0.16 | 0.06   | 0.20    | 0.49 | 0.05   | 0.38    | 0.76 | 0.05   | 0.38    | 0.75 | 0.05   | 0.39    | 0.79 |
| Alistipes                     | 0.21   | 0.02    | 0.09 | 0.17   | 0.04    | 0.24 | 0.10   | 0.26    | 0.76 | 0.10   | 0.26    | 0.75 | 0.09   | 0.28    | 0.76 |
| Allisonella                   | -0.24  | 0.02    | 0.09 | -0.11  | 0.25    | 0.57 | -0.09  | 0.39    | 0.76 | -0.09  | 0.40    | 0.75 | -0.08  | 0.42    | 0.79 |
| Anaerofilum                   | 0.25   | 0.03    | 0.12 | 0.14   | 0.21    | 0.50 | 0.12   | 0.28    | 0.76 | 0.12   | 0.29    | 0.75 | 0.12   | 0.28    | 0.76 |
| Anaerostipes                  | 0.06   | 0.65    | 0.81 | 0.00   | 0.97    | 0.99 | -0.01  | 0.94    | 0.99 | -0.01  | 0.94    | 0.99 | 0.00   | 0.98    | 1.00 |
| Anaerotruncus                 | 0.04   | 0.73    | 0.87 | 0.00   | 0.99    | 0.99 | -0.06  | 0.53    | 0.88 | -0.07  | 0.49    | 0.85 | -0.07  | 0.49    | 0.81 |
| Bacteroides                   | 0.08   | 0.68    | 0.83 | 0.03   | 0.87    | 0.94 | 0.01   | 0.96    | 0.99 | 0.02   | 0.93    | 0.99 | 0.00   | 0.99    | 1.00 |
| Barnesiella                   | 0.11   | 0.02    | 0.09 | 0.11   | 0.01    | 0.24 | 0.09   | 0.06    | 0.53 | 0.09   | 0.06    | 0.54 | 0.10   | 0.05    | 0.47 |
| Bifidobacterium               | 0.00   | 0.95    | 0.98 | 0.05   | 0.37    | 0.70 | 0.05   | 0.43    | 0.77 | 0.05   | 0.42    | 0.75 | 0.05   | 0.41    | 0.79 |
| Bilophila                     | 0.14   | 0.04    | 0.14 | 0.11   | 0.09    | 0.33 | 0.10   | 0.13    | 0.53 | 0.10   | 0.13    | 0.54 | 0.09   | 0.15    | 0.54 |
| Blautia                       | 0.07   | 0.75    | 0.89 | -0.02  | 0.93    | 0.99 | 0.01   | 0.96    | 0.99 | 0.01   | 0.97    | 1.00 | 0.04   | 0.85    | 0.99 |
| Butyricoccus                  | 0.10   | 0.50    | 0.68 | -0.05  | 0.76    | 0.92 | -0.13  | 0.41    | 0.76 | -0.13  | 0.41    | 0.75 | -0.12  | 0.45    | 0.79 |
| Butyricimonas                 | 0.05   | 0.35    | 0.57 | 0.02   | 0.64    | 0.88 | 0.03   | 0.62    | 0.90 | 0.03   | 0.61    | 0.88 | 0.03   | 0.63    | 0.92 |
| CAG.56                        | 0.08   | 0.21    | 0.43 | 0.05   | 0.46    | 0.75 | 0.02   | 0.76    | 0.93 | 0.02   | 0.76    | 0.94 | 0.02   | 0.71    | 0.92 |
| Candidatus_Soleaferrea        | -0.05  | 0.68    | 0.83 | -0.10  | 0.41    | 0.71 | -0.11  | 0.40    | 0.76 | -0.11  | 0.39    | 0.75 | -0.12  | 0.36    | 0.77 |
| Caproiciproducens             | 0.02   | 0.87    | 0.93 | 0.02   | 0.85    | 0.94 | -0.05  | 0.66    | 0.90 | -0.05  | 0.65    | 0.88 | -0.05  | 0.64    | 0.92 |
| Christensenellaceae_R.7_group | 0.10   | 0.06    | 0.17 | 0.06   | 0.26    | 0.58 | 0.02   | 0.74    | 0.93 | 0.02   | 0.77    | 0.94 | 0.02   | 0.72    | 0.92 |
| Clostridium_sensu_stricto_1   | 0.11   | 0.13    | 0.31 | 0.12   | 0.07    | 0.30 | 0.11   | 0.11    | 0.53 | 0.11   | 0.11    | 0.54 | 0.11   | 0.13    | 0.52 |
| Colidextribacter              | -0.20  | 0.14    | 0.33 | -0.26  | 0.05    | 0.27 | -0.32  | 0.02    | 0.53 | -0.33  | 0.02    | 0.54 | -0.32  | 0.02    | 0.47 |
| Collinsella                   | -0.20  | 0.00    | 0.04 | -0.13  | 0.03    | 0.24 | -0.12  | 0.04    | 0.53 | -0.12  | 0.05    | 0.54 | -0.12  | 0.05    | 0.47 |
| Coprobacter                   | 0.00   | 0.96    | 0.98 | -0.03  | 0.62    | 0.86 | -0.06  | 0.35    | 0.76 | -0.06  | 0.34    | 0.75 | -0.06  | 0.35    | 0.77 |
| Coprococcus                   | 0.08   | 0.27    | 0.47 | 0.07   | 0.29    | 0.63 | 0.05   | 0.52    | 0.88 | 0.05   | 0.52    | 0.86 | 0.05   | 0.48    | 0.81 |
| Defluviitaleaceae_UCG.011     | 0.27   | 0.01    | 0.08 | 0.23   | 0.02    | 0.24 | 0.22   | 0.04    | 0.53 | 0.22   | 0.04    | 0.54 | 0.22   | 0.04    | 0.47 |
| Desulfovibrio                 | -0.06  | 0.31    | 0.54 | -0.05  | 0.36    | 0.69 | -0.07  | 0.28    | 0.76 | -0.07  | 0.25    | 0.75 | -0.07  | 0.29    | 0.76 |
| Dialister                     | 0.01   | 0.85    | 0.92 | 0.01   | 0.79    | 0.92 | 0.00   | 0.93    | 0.99 | 0.00   | 0.94    | 0.99 | 0.00   | 0.94    | 0.99 |
| DNF00809                      | 0.10   | 0.39    | 0.60 | 0.07   | 0.52    | 0.78 | 0.06   | 0.64    | 0.90 | 0.05   | 0.65    | 0.88 | 0.05   | 0.66    | 0.92 |
| Dorea                         | -0.07  | 0.44    | 0.64 | -0.05  | 0.57    | 0.80 | -0.05  | 0.61    | 0.90 | -0.05  | 0.62    | 0.88 | -0.05  | 0.59    | 0.92 |
| DTU089                        | -0.02  | 0.84    | 0.92 | -0.04  | 0.66    | 0.88 | -0.05  | 0.57    | 0.90 | -0.06  | 0.55    | 0.88 | -0.05  | 0.62    | 0.92 |
| Eggerthella                   | 0.12   | 0.21    | 0.42 | 0.10   | 0.27    | 0.59 | 0.09   | 0.31    | 0.76 | 0.09   | 0.32    | 0.75 | 0.10   | 0.28    | 0.76 |
| Eisenbergiella                | -0.06  | 0.51    | 0.68 | -0.06  | 0.50    | 0.78 | -0.07  | 0.42    | 0.77 | -0.08  | 0.39    | 0.75 | -0.07  | 0.46    | 0.79 |
| Erysipelatoclostridium        | 0.08   | 0.41    | 0.60 | 0.09   | 0.35    | 0.69 | 0.10   | 0.33    | 0.76 | 0.09   | 0.35    | 0.75 | 0.09   | 0.34    | 0.77 |
| Erysipelotrichaceae_UCG.003   | 0.01   | 0.85    | 0.92 | 0.00   | 0.99    | 0.99 | -0.03  | 0.65    | 0.90 | -0.03  | 0.64    | 0.88 | -0.03  | 0.65    | 0.92 |
| Escherichia.Shigella          | -0.04  | 0.53    | 0.70 | 0.00   | 0.98    | 0.99 | 0.01   | 0.88    | 0.99 | 0.01   | 0.87    | 0.99 | 0.01   | 0.89    | 0.99 |
| Faecalibacterium              | 0.20   | 0.03    | 0.13 | 0.16   | 0.08    | 0.32 | 0.16   | 0.10    | 0.53 | 0.16   | 0.10    | 0.54 | 0.17   | 0.09    | 0.52 |
| Family_XIII_AD3011_group      | 0.17   | 0.05    | 0.16 | 0.10   | 0.25    | 0.57 | 0.01   | 0.88    | 0.99 | 0.01   | 0.92    | 0.99 | 0.01   | 0.89    | 0.99 |
| Family_XIII_UCG.001           | 0.12   | 0.27    | 0.47 | 0.07   | 0.50    | 0.78 | 0.04   | 0.71    | 0.91 | 0.04   | 0.75    | 0.94 | 0.04   | 0.71    | 0.92 |
| FD2005                        | -0.06  | 0.55    | 0.72 | -0.03  | 0.79    | 0.92 | -0.04  | 0.70    | 0.91 | -0.04  | 0.71    | 0.93 | -0.04  | 0.72    | 0.92 |
| Flavonifractor                | -0.07  | 0.42    | 0.62 | -0.07  | 0.44    | 0.75 | -0.09  | 0.33    | 0.76 | -0.09  | 0.33    | 0.75 | -0.09  | 0.33    | 0.77 |
| Fournierella                  | 0.05   | 0.60    | 0.77 | 0.04   | 0.68    | 0.89 | 0.05   | 0.61    | 0.90 | 0.05   | 0.63    | 0.88 | 0.06   | 0.54    | 0.88 |
| Frisingicoccus                | 0.03   | 0.72    | 0.87 | 0.00   | 0.99    | 0.99 | -0.07  | 0.39    | 0.76 | -0.07  | 0.37    | 0.75 | -0.06  | 0.41    | 0.79 |
| Fusicatenibacter              | -0.01  | 0.93    | 0.98 | -0.04  | 0.55    | 0.80 | -0.08  | 0.28    | 0.76 | -0.08  | 0.30    | 0.75 | -0.08  | 0.30    | 0.77 |
| Fusobacterium                 | -0.14  | 0.20    | 0.42 | -0.09  | 0.39    | 0.71 | 0.00   | 0.97    | 0.99 | 0.00   | 0.99    | 1.00 | 0.00   | 1.00    | 1.00 |
| GCA.900066575                 | 0.00   | 0.98    | 0.98 | -0.08  | 0.41    | 0.71 | -0.13  | 0.20    | 0.64 | -0.13  | 0.18    | 0.60 | -0.14  | 0.16    | 0.54 |
| Gordonibacter                 | 0.27   | 0.01    | 0.07 | 0.23   | 0.02    | 0.24 | 0.18   | 0.08    | 0.53 | 0.17   | 0.09    | 0.54 | 0.17   | 0.09    | 0.52 |
| Granulicatella                | 0.10   | 0.45    | 0.64 | 0.12   | 0.36    | 0.69 | 0.11   | 0.43    | 0.77 | 0.11   | 0.42    | 0.75 | 0.12   | 0.38    | 0.79 |
| Haemophilus                   | 0.15   | 0.04    | 0.14 | 0.12   | 0.09    | 0.33 | 0.11   | 0.14    | 0.53 | 0.11   | 0.14    | 0.54 | 0.12   | 0.12    | 0.52 |
| Harryflintia                  | 0.05   | 0.68    | 0.83 | 0.02   | 0.83    | 0.94 | 0.00   | 0.98    | 0.99 | 0.00   | 1.00    | 1.00 | -0.01  | 0.95    | 0.99 |
| Holdemanella                  | -0.06  | 0.40    | 0.60 | -0.04  | 0.56    | 0.80 | -0.03  | 0.70    | 0.91 | -0.03  | 0.72    | 0.93 | -0.03  | 0.73    | 0.92 |
| Holdemania                    | 0.16   | 0.37    | 0.59 | 0.16   | 0.34    | 0.69 | 0.04   | 0.81    | 0.96 | 0.04   | 0.83    | 0.98 | 0.01   | 0.95    | 0.99 |

|                               |       |      |      |       |      |      |       |      |      |       |      |      |       |      |      |
|-------------------------------|-------|------|------|-------|------|------|-------|------|------|-------|------|------|-------|------|------|
| Hungatella                    | -0.19 | 0.04 | 0.13 | -0.16 | 0.06 | 0.27 | -0.13 | 0.16 | 0.55 | -0.13 | 0.16 | 0.54 | -0.12 | 0.20 | 0.64 |
| Hydrogenoanaerobacterium      | 0.27  | 0.01 | 0.06 | 0.19  | 0.05 | 0.27 | 0.15  | 0.13 | 0.53 | 0.15  | 0.14 | 0.54 | 0.15  | 0.14 | 0.52 |
| Incertae_Sedis                | 0.13  | 0.41 | 0.60 | 0.14  | 0.32 | 0.67 | 0.05  | 0.76 | 0.93 | 0.05  | 0.77 | 0.94 | 0.05  | 0.75 | 0.94 |
| Intestinibacter               | 0.13  | 0.14 | 0.33 | 0.18  | 0.04 | 0.24 | 0.15  | 0.09 | 0.53 | 0.15  | 0.08 | 0.54 | 0.16  | 0.07 | 0.52 |
| Intestinimonas                | 0.24  | 0.00 | 0.05 | 0.17  | 0.03 | 0.24 | 0.15  | 0.06 | 0.53 | 0.15  | 0.07 | 0.54 | 0.16  | 0.05 | 0.47 |
| Lachnoclostridium             | -0.38 | 0.03 | 0.13 | -0.24 | 0.15 | 0.42 | -0.10 | 0.57 | 0.90 | -0.10 | 0.59 | 0.88 | -0.10 | 0.57 | 0.91 |
| Lachnospira                   | 0.26  | 0.00 | 0.04 | 0.16  | 0.06 | 0.27 | 0.11  | 0.20 | 0.64 | 0.12  | 0.19 | 0.60 | 0.13  | 0.16 | 0.54 |
| Lachnospiraceae_FCS020_group  | 0.28  | 0.00 | 0.04 | 0.19  | 0.03 | 0.24 | 0.14  | 0.13 | 0.53 | 0.14  | 0.13 | 0.54 | 0.14  | 0.14 | 0.52 |
| Lachnospiraceae_ND3007_group  | 0.10  | 0.09 | 0.23 | 0.05  | 0.36 | 0.69 | 0.02  | 0.69 | 0.91 | 0.03  | 0.67 | 0.90 | 0.03  | 0.64 | 0.92 |
| Lachnospiraceae_NK4A136_group | 0.11  | 0.21 | 0.43 | 0.02  | 0.82 | 0.94 | -0.08 | 0.41 | 0.76 | -0.08 | 0.41 | 0.75 | -0.07 | 0.45 | 0.79 |
| Lachnospiraceae_UCG.001       | 0.15  | 0.02 | 0.09 | 0.12  | 0.04 | 0.26 | 0.10  | 0.15 | 0.53 | 0.09  | 0.15 | 0.54 | 0.10  | 0.14 | 0.52 |
| Lachnospiraceae_UCG.004       | 0.03  | 0.63 | 0.80 | 0.00  | 0.98 | 0.99 | 0.00  | 0.95 | 0.99 | 0.01  | 0.94 | 0.99 | -0.01 | 0.91 | 0.99 |
| Lachnospiraceae_UCG.010       | -0.12 | 0.23 | 0.44 | -0.19 | 0.05 | 0.27 | -0.22 | 0.03 | 0.53 | -0.22 | 0.03 | 0.54 | -0.23 | 0.03 | 0.47 |
| Lactobacillus                 | -0.26 | 0.00 | 0.04 | -0.18 | 0.03 | 0.24 | -0.20 | 0.02 | 0.53 | -0.20 | 0.02 | 0.54 | -0.20 | 0.02 | 0.47 |
| Lactococcus                   | 0.08  | 0.46 | 0.65 | 0.05  | 0.66 | 0.88 | 0.06  | 0.61 | 0.90 | 0.06  | 0.63 | 0.88 | 0.04  | 0.72 | 0.92 |
| Marvinbryantia                | -0.01 | 0.89 | 0.95 | -0.05 | 0.45 | 0.75 | -0.02 | 0.75 | 0.93 | -0.02 | 0.74 | 0.94 | -0.02 | 0.80 | 0.98 |
| Megasphaera                   | -0.10 | 0.09 | 0.23 | -0.04 | 0.46 | 0.75 | 0.00  | 0.95 | 0.99 | 0.00  | 0.94 | 0.99 | 0.00  | 0.96 | 1.00 |
| Monoglobus                    | 0.25  | 0.00 | 0.06 | 0.21  | 0.01 | 0.24 | 0.18  | 0.05 | 0.53 | 0.18  | 0.05 | 0.54 | 0.19  | 0.04 | 0.47 |
| Moryella                      | 0.15  | 0.21 | 0.42 | 0.07  | 0.54 | 0.80 | -0.01 | 0.95 | 0.99 | -0.01 | 0.95 | 0.99 | 0.00  | 0.99 | 1.00 |
| Negativibacillus              | -0.12 | 0.11 | 0.27 | -0.10 | 0.14 | 0.40 | -0.11 | 0.15 | 0.53 | -0.11 | 0.15 | 0.54 | -0.11 | 0.13 | 0.52 |
| NK4A214_group                 | 0.06  | 0.33 | 0.56 | 0.02  | 0.77 | 0.92 | -0.01 | 0.81 | 0.96 | -0.02 | 0.79 | 0.94 | -0.01 | 0.87 | 0.99 |
| Odoribacter                   | 0.11  | 0.05 | 0.16 | 0.09  | 0.11 | 0.35 | 0.06  | 0.28 | 0.76 | 0.06  | 0.29 | 0.75 | 0.06  | 0.28 | 0.76 |
| Oscillibacter                 | 0.21  | 0.03 | 0.12 | 0.17  | 0.06 | 0.27 | 0.08  | 0.38 | 0.76 | 0.08  | 0.41 | 0.75 | 0.08  | 0.42 | 0.79 |
| Oscillospira                  | 0.04  | 0.77 | 0.89 | 0.05  | 0.71 | 0.91 | 0.00  | 1.00 | 1.00 | 0.00  | 0.98 | 1.00 | 0.01  | 0.95 | 0.99 |
| Oxalobacter                   | 0.24  | 0.01 | 0.08 | 0.14  | 0.14 | 0.40 | 0.07  | 0.45 | 0.80 | 0.07  | 0.46 | 0.81 | 0.08  | 0.43 | 0.79 |
| Paludicola                    | 0.12  | 0.23 | 0.44 | 0.03  | 0.75 | 0.92 | -0.04 | 0.66 | 0.90 | -0.05 | 0.61 | 0.88 | -0.04 | 0.70 | 0.92 |
| Parabacteroides               | -0.07 | 0.34 | 0.56 | -0.03 | 0.70 | 0.90 | -0.01 | 0.88 | 0.99 | -0.01 | 0.89 | 0.99 | -0.01 | 0.90 | 0.99 |
| Paraprevotella                | -0.01 | 0.84 | 0.92 | 0.01  | 0.82 | 0.94 | 0.01  | 0.87 | 0.99 | 0.01  | 0.89 | 0.99 | 0.01  | 0.88 | 0.99 |
| Parasutterella                | 0.15  | 0.00 | 0.06 | 0.13  | 0.01 | 0.24 | 0.07  | 0.20 | 0.64 | 0.07  | 0.19 | 0.60 | 0.07  | 0.22 | 0.70 |
| Peptococcus                   | 0.11  | 0.27 | 0.47 | 0.04  | 0.66 | 0.88 | -0.05 | 0.65 | 0.90 | -0.05 | 0.63 | 0.88 | -0.04 | 0.67 | 0.92 |
| Phascolarctobacterium         | 0.03  | 0.49 | 0.67 | 0.04  | 0.38 | 0.70 | 0.04  | 0.38 | 0.76 | 0.04  | 0.40 | 0.75 | 0.04  | 0.38 | 0.79 |
| Phocaea                       | -0.24 | 0.06 | 0.17 | -0.27 | 0.02 | 0.24 | -0.30 | 0.01 | 0.53 | -0.30 | 0.01 | 0.54 | -0.31 | 0.01 | 0.47 |
| Prevotella                    | -0.11 | 0.02 | 0.11 | -0.07 | 0.09 | 0.33 | -0.06 | 0.22 | 0.69 | -0.06 | 0.23 | 0.69 | -0.05 | 0.27 | 0.76 |
| Romboutsia                    | 0.02  | 0.79 | 0.90 | 0.05  | 0.52 | 0.78 | 0.01  | 0.90 | 0.99 | 0.01  | 0.88 | 0.99 | 0.01  | 0.88 | 0.99 |
| Roseburia                     | 0.02  | 0.84 | 0.92 | -0.01 | 0.92 | 0.98 | -0.06 | 0.55 | 0.89 | -0.06 | 0.56 | 0.88 | -0.05 | 0.62 | 0.92 |
| Ruminococcus                  | 0.13  | 0.03 | 0.12 | 0.08  | 0.16 | 0.43 | 0.05  | 0.40 | 0.76 | 0.05  | 0.41 | 0.75 | 0.06  | 0.36 | 0.77 |
| Sellimonas                    | 0.16  | 0.06 | 0.17 | 0.13  | 0.11 | 0.35 | 0.14  | 0.11 | 0.53 | 0.13  | 0.12 | 0.54 | 0.14  | 0.12 | 0.52 |
| Senegalimassilia              | -0.13 | 0.11 | 0.27 | -0.12 | 0.11 | 0.35 | -0.13 | 0.11 | 0.53 | -0.13 | 0.11 | 0.54 | -0.13 | 0.12 | 0.52 |
| Shuttleworthia                | 0.29  | 0.00 | 0.04 | 0.19  | 0.03 | 0.24 | 0.13  | 0.14 | 0.53 | 0.13  | 0.15 | 0.54 | 0.14  | 0.13 | 0.52 |
| Slackia                       | -0.15 | 0.04 | 0.13 | -0.13 | 0.06 | 0.27 | -0.14 | 0.06 | 0.53 | -0.14 | 0.06 | 0.54 | -0.14 | 0.05 | 0.47 |
| Streptococcus                 | 0.14  | 0.19 | 0.42 | 0.13  | 0.19 | 0.47 | 0.18  | 0.09 | 0.53 | 0.18  | 0.09 | 0.54 | 0.19  | 0.08 | 0.52 |
| Subdoligranulum               | 0.16  | 0.04 | 0.14 | 0.12  | 0.11 | 0.35 | 0.08  | 0.32 | 0.76 | 0.08  | 0.33 | 0.75 | 0.08  | 0.31 | 0.77 |
| Sutterella                    | -0.12 | 0.01 | 0.08 | -0.08 | 0.08 | 0.33 | -0.05 | 0.32 | 0.76 | -0.05 | 0.32 | 0.75 | -0.05 | 0.32 | 0.77 |
| TM7x                          | -0.01 | 0.96 | 0.98 | -0.07 | 0.52 | 0.78 | -0.05 | 0.62 | 0.90 | -0.05 | 0.62 | 0.88 | -0.04 | 0.71 | 0.92 |
| Turicibacter                  | 0.28  | 0.01 | 0.08 | 0.34  | 0.00 | 0.14 | 0.34  | 0.00 | 0.19 | 0.34  | 0.00 | 0.18 | 0.33  | 0.00 | 0.28 |
| Tuzzerella                    | -0.12 | 0.10 | 0.25 | -0.10 | 0.16 | 0.43 | -0.14 | 0.06 | 0.53 | -0.14 | 0.06 | 0.54 | -0.15 | 0.05 | 0.47 |
| UBA1819                       | 0.00  | 0.98 | 0.98 | -0.02 | 0.86 | 0.94 | -0.10 | 0.39 | 0.76 | -0.11 | 0.35 | 0.75 | -0.11 | 0.35 | 0.77 |
| UCG.002                       | 0.12  | 0.03 | 0.13 | 0.07  | 0.17 | 0.43 | 0.04  | 0.49 | 0.85 | 0.04  | 0.51 | 0.86 | 0.04  | 0.49 | 0.81 |
| UCG.003                       | 0.03  | 0.59 | 0.76 | -0.02 | 0.72 | 0.91 | -0.06 | 0.34 | 0.76 | -0.06 | 0.34 | 0.75 | -0.07 | 0.31 | 0.77 |
| UCG.005                       | 0.07  | 0.33 | 0.56 | 0.02  | 0.78 | 0.92 | -0.03 | 0.66 | 0.90 | -0.04 | 0.62 | 0.88 | -0.03 | 0.68 | 0.92 |
| UCG.009                       | 0.12  | 0.27 | 0.47 | 0.02  | 0.82 | 0.94 | -0.03 | 0.80 | 0.96 | -0.03 | 0.79 | 0.94 | -0.02 | 0.84 | 0.99 |
| Veillonella                   | 0.13  | 0.09 | 0.24 | 0.12  | 0.09 | 0.33 | 0.11  | 0.15 | 0.53 | 0.11  | 0.14 | 0.54 | 0.12  | 0.13 | 0.52 |
| Victivallis                   | 0.11  | 0.15 | 0.34 | 0.06  | 0.40 | 0.71 | 0.01  | 0.92 | 0.99 | 0.01  | 0.94 | 0.99 | 0.01  | 0.88 | 0.99 |

Multivariable-adjusted regression models adjusted for:

Model 1: sequencing batch, age, race, gender, study center

Model 2: Model 1, with education

Model 3: Model 2, with physical activity, diet score, medication use, and smoking

Model 4: Model 3 with BMI

Model 5: Model 4 with hypertension and diabetes



eTable 15: Multivariable-adjusted regression coefficients, p-values, and false discovery rate (FDR)-adjusted p-values for genera with respect to category fluency.

|                               | Model1 |         |      | Model2 |         |      | Model3 |         |      | Model4 |         |      | Model5 |         |      |
|-------------------------------|--------|---------|------|--------|---------|------|--------|---------|------|--------|---------|------|--------|---------|------|
|                               | beta   | p-value | FDR  | beta   | p-value | FDR  | beta   | p-value | FDR  | beta   | p-value | FDR  | beta   | p-value | FDR  |
| Acetanaerobacterium           | -0.16  | 0.71    | 0.84 | 0.01   | 0.97    | 0.99 | 0.00   | 1.00    | 1.00 | -0.02  | 0.96    | 0.97 | -0.06  | 0.90    | 0.97 |
| Acidaminococcus               | -0.31  | 0.03    | 0.25 | -0.19  | 0.16    | 0.60 | -0.18  | 0.23    | 0.92 | -0.17  | 0.26    | 0.92 | -0.17  | 0.25    | 0.91 |
| Actinomyces                   | -0.39  | 0.30    | 0.59 | -0.30  | 0.42    | 0.82 | -0.19  | 0.63    | 0.92 | -0.20  | 0.62    | 0.92 | -0.16  | 0.68    | 0.91 |
| Adlercreutzia                 | -0.01  | 0.97    | 0.99 | -0.05  | 0.83    | 0.92 | -0.11  | 0.65    | 0.93 | -0.12  | 0.62    | 0.92 | -0.14  | 0.56    | 0.91 |
| Agathobacter                  | 0.15   | 0.61    | 0.83 | 0.11   | 0.68    | 0.90 | 0.02   | 0.95    | 0.98 | 0.06   | 0.84    | 0.96 | 0.10   | 0.73    | 0.93 |
| Akkermansia                   | 0.05   | 0.73    | 0.85 | -0.04  | 0.79    | 0.92 | -0.08  | 0.62    | 0.92 | -0.08  | 0.62    | 0.92 | -0.09  | 0.54    | 0.91 |
| Alistipes                     | 0.08   | 0.76    | 0.86 | -0.01  | 0.96    | 0.99 | -0.17  | 0.50    | 0.92 | -0.17  | 0.50    | 0.92 | -0.19  | 0.44    | 0.91 |
| Allisonella                   | 0.05   | 0.87    | 0.92 | 0.38   | 0.18    | 0.60 | 0.38   | 0.22    | 0.92 | 0.39   | 0.20    | 0.89 | 0.42   | 0.18    | 0.89 |
| Anaerofilum                   | 0.37   | 0.26    | 0.53 | 0.09   | 0.78    | 0.92 | 0.06   | 0.87    | 0.94 | 0.03   | 0.92    | 0.97 | 0.01   | 0.97    | 0.99 |
| Anaerostipes                  | -0.08  | 0.81    | 0.90 | -0.21  | 0.54    | 0.85 | -0.25  | 0.48    | 0.92 | -0.25  | 0.48    | 0.92 | -0.25  | 0.49    | 0.91 |
| Anaerotruncus                 | 0.01   | 0.97    | 0.99 | -0.08  | 0.79    | 0.92 | -0.11  | 0.73    | 0.94 | -0.16  | 0.61    | 0.92 | -0.17  | 0.59    | 0.91 |
| Bacteroides                   | -0.14  | 0.78    | 0.87 | -0.26  | 0.61    | 0.86 | -0.27  | 0.61    | 0.92 | -0.22  | 0.67    | 0.93 | -0.21  | 0.69    | 0.91 |
| Barnesiella                   | 0.54   | 0.00    | 0.01 | 0.54   | 0.00    | 0.01 | 0.58   | 0.00    | 0.01 | 0.57   | 0.00    | 0.01 | 0.59   | 0.00    | 0.00 |
| Bifidobacterium               | -0.08  | 0.66    | 0.83 | 0.06   | 0.75    | 0.91 | 0.04   | 0.82    | 0.94 | 0.05   | 0.78    | 0.95 | 0.05   | 0.80    | 0.93 |
| Bilophila                     | 0.57   | 0.00    | 0.06 | 0.50   | 0.01    | 0.20 | 0.51   | 0.01    | 0.44 | 0.52   | 0.01    | 0.40 | 0.50   | 0.01    | 0.51 |
| Blautia                       | -0.48  | 0.46    | 0.75 | -0.70  | 0.27    | 0.70 | -0.62  | 0.34    | 0.92 | -0.65  | 0.32    | 0.92 | -0.63  | 0.35    | 0.91 |
| Butyricoccus                  | 0.55   | 0.22    | 0.51 | 0.19   | 0.66    | 0.90 | 0.12   | 0.79    | 0.94 | 0.14   | 0.77    | 0.95 | 0.12   | 0.79    | 0.93 |
| Butyrivimonas                 | 0.36   | 0.03    | 0.25 | 0.29   | 0.06    | 0.50 | 0.32   | 0.05    | 0.64 | 0.32   | 0.05    | 0.54 | 0.33   | 0.05    | 0.56 |
| CAG.56                        | 0.23   | 0.21    | 0.50 | 0.15   | 0.41    | 0.82 | 0.10   | 0.62    | 0.92 | 0.10   | 0.61    | 0.92 | 0.10   | 0.60    | 0.91 |
| Candidatus_Soleaferrea        | -0.02  | 0.95    | 0.99 | -0.14  | 0.70    | 0.90 | -0.10  | 0.79    | 0.94 | -0.11  | 0.77    | 0.95 | -0.15  | 0.71    | 0.91 |
| Caproiciproducens             | -0.49  | 0.12    | 0.41 | -0.48  | 0.12    | 0.57 | -0.49  | 0.14    | 0.92 | -0.50  | 0.13    | 0.83 | -0.55  | 0.10    | 0.76 |
| Christensenellaceae_R.7_group | 0.33   | 0.03    | 0.27 | 0.23   | 0.13    | 0.59 | 0.18   | 0.28    | 0.92 | 0.16   | 0.33    | 0.92 | 0.15   | 0.36    | 0.91 |
| Clostridium_sensu_stricto_1   | 0.08   | 0.70    | 0.84 | 0.11   | 0.56    | 0.85 | 0.11   | 0.60    | 0.92 | 0.11   | 0.61    | 0.92 | 0.10   | 0.64    | 0.91 |
| Colidextribacter              | -0.06  | 0.88    | 0.92 | -0.19  | 0.61    | 0.86 | -0.21  | 0.60    | 0.92 | -0.23  | 0.57    | 0.92 | -0.19  | 0.65    | 0.91 |
| Collinsella                   | 0.25   | 0.15    | 0.41 | 0.43   | 0.01    | 0.25 | 0.43   | 0.02    | 0.44 | 0.44   | 0.01    | 0.44 | 0.43   | 0.02    | 0.51 |
| Coprobacter                   | 0.32   | 0.09    | 0.38 | 0.24   | 0.20    | 0.63 | 0.14   | 0.47    | 0.92 | 0.13   | 0.50    | 0.92 | 0.12   | 0.55    | 0.91 |
| Coprococcus                   | 0.13   | 0.52    | 0.78 | 0.12   | 0.57    | 0.85 | 0.09   | 0.67    | 0.93 | 0.09   | 0.67    | 0.93 | 0.11   | 0.60    | 0.91 |
| Defluviitaleaceae_UCG.011     | 0.43   | 0.15    | 0.41 | 0.33   | 0.26    | 0.70 | 0.38   | 0.22    | 0.92 | 0.35   | 0.26    | 0.92 | 0.31   | 0.32    | 0.91 |
| Desulfovibrio                 | -0.15  | 0.37    | 0.68 | -0.13  | 0.43    | 0.82 | -0.18  | 0.30    | 0.92 | -0.21  | 0.24    | 0.92 | -0.23  | 0.21    | 0.91 |
| Dialister                     | -0.06  | 0.65    | 0.83 | -0.05  | 0.69    | 0.90 | -0.03  | 0.81    | 0.94 | -0.03  | 0.84    | 0.96 | -0.01  | 0.93    | 0.98 |
| DNF00809                      | -0.21  | 0.52    | 0.78 | -0.29  | 0.38    | 0.81 | -0.27  | 0.43    | 0.92 | -0.30  | 0.39    | 0.92 | -0.30  | 0.38    | 0.91 |
| Dorea                         | -0.05  | 0.84    | 0.91 | -0.01  | 0.98    | 0.99 | -0.04  | 0.87    | 0.94 | -0.03  | 0.91    | 0.97 | -0.05  | 0.86    | 0.96 |
| DTU089                        | -0.40  | 0.14    | 0.41 | -0.46  | 0.09    | 0.51 | -0.49  | 0.08    | 0.64 | -0.51  | 0.07    | 0.62 | -0.47  | 0.10    | 0.76 |
| Eggerthella                   | -0.37  | 0.15    | 0.41 | -0.42  | 0.10    | 0.52 | -0.36  | 0.18    | 0.92 | -0.38  | 0.17    | 0.83 | -0.36  | 0.19    | 0.89 |
| Eisenbergiella                | -0.31  | 0.25    | 0.53 | -0.31  | 0.24    | 0.67 | -0.34  | 0.21    | 0.92 | -0.39  | 0.16    | 0.83 | -0.37  | 0.18    | 0.89 |
| Erysipelatoclostridium        | -0.45  | 0.11    | 0.41 | -0.43  | 0.12    | 0.57 | -0.38  | 0.19    | 0.92 | -0.42  | 0.15    | 0.83 | -0.41  | 0.16    | 0.89 |
| Erysipelotrichaceae_UCG.003   | 0.16   | 0.43    | 0.74 | 0.13   | 0.51    | 0.85 | 0.12   | 0.56    | 0.92 | 0.12   | 0.57    | 0.92 | 0.10   | 0.64    | 0.91 |
| Escherichia.Shigella          | -0.26  | 0.16    | 0.43 | -0.16  | 0.38    | 0.81 | -0.10  | 0.63    | 0.92 | -0.09  | 0.66    | 0.93 | -0.09  | 0.67    | 0.91 |
| Faecalibacterium              | 0.18   | 0.51    | 0.78 | 0.07   | 0.79    | 0.92 | 0.04   | 0.88    | 0.94 | 0.05   | 0.85    | 0.96 | 0.05   | 0.85    | 0.96 |
| Family_XIII_AD3011_group      | 0.21   | 0.40    | 0.71 | 0.03   | 0.89    | 0.95 | -0.05  | 0.84    | 0.94 | -0.09  | 0.73    | 0.95 | -0.13  | 0.63    | 0.91 |
| Family_XIII_UCG.001           | 0.53   | 0.09    | 0.38 | 0.41   | 0.17    | 0.60 | 0.34   | 0.30    | 0.92 | 0.30   | 0.36    | 0.92 | 0.27   | 0.41    | 0.91 |
| FD2005                        | -0.22  | 0.46    | 0.75 | -0.13  | 0.65    | 0.90 | -0.11  | 0.72    | 0.94 | -0.10  | 0.74    | 0.95 | -0.09  | 0.77    | 0.93 |
| Flavonifractor                | -0.39  | 0.14    | 0.41 | -0.37  | 0.15    | 0.60 | -0.32  | 0.25    | 0.92 | -0.31  | 0.25    | 0.92 | -0.30  | 0.29    | 0.91 |
| Fournierella                  | -0.12  | 0.67    | 0.83 | -0.16  | 0.57    | 0.85 | -0.21  | 0.47    | 0.92 | -0.24  | 0.42    | 0.92 | -0.23  | 0.45    | 0.91 |
| Frisingicoccus                | 0.14   | 0.52    | 0.78 | 0.08   | 0.71    | 0.90 | 0.02   | 0.93    | 0.97 | 0.00   | 0.99    | 0.99 | 0.00   | 0.99    | 0.99 |
| Fusicatenibacter              | 0.37   | 0.08    | 0.38 | 0.28   | 0.17    | 0.60 | 0.20   | 0.36    | 0.92 | 0.23   | 0.30    | 0.92 | 0.19   | 0.41    | 0.91 |
| Fusobacterium                 | -0.18  | 0.58    | 0.81 | -0.05  | 0.86    | 0.93 | 0.11   | 0.74    | 0.94 | 0.08   | 0.80    | 0.96 | 0.10   | 0.77    | 0.93 |
| GCA.900066575                 | 0.33   | 0.24    | 0.53 | 0.15   | 0.60    | 0.86 | 0.13   | 0.66    | 0.93 | 0.09   | 0.75    | 0.95 | 0.06   | 0.84    | 0.95 |
| Gordonibacter                 | 0.21   | 0.48    | 0.75 | 0.11   | 0.70    | 0.90 | 0.20   | 0.50    | 0.92 | 0.16   | 0.59    | 0.92 | 0.14   | 0.64    | 0.91 |
| Granulicatella                | -0.06  | 0.88    | 0.92 | -0.02  | 0.95    | 0.99 | 0.02   | 0.96    | 0.98 | 0.04   | 0.93    | 0.97 | 0.11   | 0.78    | 0.93 |
| Haemophilus                   | 0.37   | 0.08    | 0.38 | 0.29   | 0.15    | 0.60 | 0.17   | 0.43    | 0.92 | 0.17   | 0.44    | 0.92 | 0.19   | 0.39    | 0.91 |
| Harryflintia                  | -0.14  | 0.66    | 0.83 | -0.19  | 0.53    | 0.85 | -0.28  | 0.41    | 0.92 | -0.30  | 0.37    | 0.92 | -0.33  | 0.33    | 0.91 |
| Holdemanella                  | 0.07   | 0.74    | 0.85 | 0.12   | 0.55    | 0.85 | 0.18   | 0.41    | 0.92 | 0.19   | 0.39    | 0.92 | 0.18   | 0.41    | 0.91 |
| Holdemania                    | 0.17   | 0.74    | 0.85 | 0.17   | 0.72    | 0.91 | 0.13   | 0.79    | 0.94 | 0.09   | 0.86    | 0.96 | 0.01   | 0.99    | 0.99 |

|                             |       |      |      |       |      |      |       |      |      |       |      |      |       |      |      |
|-----------------------------|-------|------|------|-------|------|------|-------|------|------|-------|------|------|-------|------|------|
| Hungatella                  | -0.74 | 0.00 | 0.10 | -0.67 | 0.01 | 0.21 | -0.61 | 0.02 | 0.47 | -0.62 | 0.02 | 0.44 | -0.58 | 0.03 | 0.56 |
| Hydrogenoanaerobacterium    | 0.28  | 0.32 | 0.61 | 0.06  | 0.82 | 0.92 | -0.05 | 0.87 | 0.94 | -0.09 | 0.77 | 0.95 | -0.12 | 0.68 | 0.91 |
| Incertae_Sedis              | -0.13 | 0.76 | 0.86 | -0.09 | 0.84 | 0.92 | -0.03 | 0.95 | 0.98 | -0.04 | 0.93 | 0.97 | -0.06 | 0.90 | 0.97 |
| Intestinibacter             | -0.11 | 0.67 | 0.83 | 0.00  | 0.99 | 0.99 | -0.05 | 0.86 | 0.94 | -0.01 | 0.96 | 0.97 | -0.01 | 0.98 | 0.99 |
| Intestinimonas              | 0.39  | 0.09 | 0.38 | 0.23  | 0.32 | 0.72 | 0.14  | 0.57 | 0.92 | 0.11  | 0.65 | 0.93 | 0.13  | 0.60 | 0.91 |
| Lachnoclostridium           | -0.89 | 0.08 | 0.38 | -0.57 | 0.24 | 0.67 | -0.27 | 0.60 | 0.92 | -0.23 | 0.66 | 0.93 | -0.20 | 0.71 | 0.91 |
| Lachnospira                 | 0.79  | 0.00 | 0.04 | 0.55  | 0.02 | 0.36 | 0.36  | 0.17 | 0.92 | 0.37  | 0.15 | 0.83 | 0.39  | 0.14 | 0.89 |
| Lachnospiraceae_FCS020_grou | 0.68  | 0.01 | 0.15 | 0.45  | 0.07 | 0.50 | 0.48  | 0.08 | 0.64 | 0.48  | 0.08 | 0.62 | 0.45  | 0.10 | 0.76 |
| Lachnospiraceae_ND3007_gro  | 0.43  | 0.01 | 0.17 | 0.31  | 0.07 | 0.50 | 0.25  | 0.17 | 0.92 | 0.26  | 0.14 | 0.83 | 0.26  | 0.15 | 0.89 |
| Lachnospiraceae_NK4A136_gr  | 0.39  | 0.11 | 0.41 | 0.18  | 0.45 | 0.82 | -0.04 | 0.87 | 0.94 | -0.04 | 0.87 | 0.96 | -0.05 | 0.87 | 0.96 |
| Lachnospiraceae_UCG.001     | 0.30  | 0.10 | 0.38 | 0.24  | 0.19 | 0.60 | 0.14  | 0.46 | 0.92 | 0.13  | 0.51 | 0.92 | 0.12  | 0.53 | 0.91 |
| Lachnospiraceae_UCG.004     | 0.19  | 0.34 | 0.66 | 0.11  | 0.56 | 0.85 | 0.03  | 0.89 | 0.94 | 0.04  | 0.84 | 0.96 | 0.03  | 0.90 | 0.97 |
| Lachnospiraceae_UCG.010     | -0.39 | 0.18 | 0.45 | -0.56 | 0.05 | 0.49 | -0.56 | 0.06 | 0.64 | -0.59 | 0.05 | 0.54 | -0.58 | 0.05 | 0.56 |
| Lactobacillus               | -0.34 | 0.15 | 0.41 | -0.14 | 0.55 | 0.85 | -0.16 | 0.53 | 0.92 | -0.13 | 0.60 | 0.92 | -0.11 | 0.68 | 0.91 |
| Lactococcus                 | 0.56  | 0.08 | 0.38 | 0.48  | 0.13 | 0.59 | 0.49  | 0.15 | 0.92 | 0.47  | 0.16 | 0.83 | 0.45  | 0.18 | 0.89 |
| Marvinbryantia              | -0.03 | 0.87 | 0.92 | -0.13 | 0.49 | 0.85 | -0.10 | 0.61 | 0.92 | -0.11 | 0.59 | 0.92 | -0.08 | 0.69 | 0.91 |
| Megasphaera                 | -0.20 | 0.24 | 0.53 | -0.05 | 0.74 | 0.91 | 0.05  | 0.79 | 0.94 | 0.05  | 0.77 | 0.95 | 0.05  | 0.80 | 0.93 |
| Monoglobus                  | 0.55  | 0.03 | 0.25 | 0.45  | 0.06 | 0.50 | 0.36  | 0.18 | 0.92 | 0.35  | 0.19 | 0.89 | 0.34  | 0.21 | 0.91 |
| Moryella                    | 0.60  | 0.07 | 0.38 | 0.41  | 0.20 | 0.63 | 0.30  | 0.40 | 0.92 | 0.30  | 0.40 | 0.92 | 0.30  | 0.40 | 0.91 |
| Negativibacillus            | -0.10 | 0.64 | 0.83 | -0.07 | 0.74 | 0.91 | -0.08 | 0.70 | 0.94 | -0.09 | 0.69 | 0.93 | -0.11 | 0.62 | 0.91 |
| NK4A214_group               | 0.22  | 0.19 | 0.45 | 0.12  | 0.44 | 0.82 | 0.03  | 0.88 | 0.94 | 0.01  | 0.96 | 0.97 | 0.01  | 0.97 | 0.99 |
| Odoribacter                 | 0.33  | 0.04 | 0.29 | 0.27  | 0.08 | 0.50 | 0.18  | 0.27 | 0.92 | 0.18  | 0.28 | 0.92 | 0.16  | 0.34 | 0.91 |
| Oscillibacter               | 0.25  | 0.37 | 0.68 | 0.15  | 0.57 | 0.85 | 0.22  | 0.44 | 0.92 | 0.19  | 0.51 | 0.92 | 0.16  | 0.58 | 0.91 |
| Oscillospira                | -0.31 | 0.41 | 0.73 | -0.29 | 0.43 | 0.82 | -0.23 | 0.55 | 0.92 | -0.25 | 0.53 | 0.92 | -0.22 | 0.58 | 0.91 |
| Oxalobacter                 | 0.53  | 0.05 | 0.35 | 0.28  | 0.29 | 0.72 | 0.23  | 0.42 | 0.92 | 0.23  | 0.43 | 0.92 | 0.20  | 0.49 | 0.91 |
| Paludicola                  | 0.00  | 0.99 | 0.99 | -0.22 | 0.42 | 0.82 | -0.34 | 0.24 | 0.92 | -0.41 | 0.17 | 0.83 | -0.43 | 0.15 | 0.89 |
| Parabacteroides             | 0.29  | 0.14 | 0.41 | 0.39  | 0.04 | 0.49 | 0.39  | 0.05 | 0.64 | 0.40  | 0.05 | 0.54 | 0.41  | 0.04 | 0.56 |
| Paraprevotella              | -0.07 | 0.65 | 0.83 | -0.01 | 0.92 | 0.97 | -0.03 | 0.85 | 0.94 | -0.04 | 0.80 | 0.96 | -0.03 | 0.84 | 0.95 |
| Parasutterella              | 0.38  | 0.01 | 0.35 | 0.02  | 0.31 | 0.31 | 0.29  | 0.07 | 0.64 | 0.30  | 0.06 | 0.59 | 0.26  | 0.10 | 0.76 |
| Peptococcus                 | 0.17  | 0.57 | 0.81 | 0.00  | 0.99 | 0.99 | -0.13 | 0.66 | 0.93 | -0.16 | 0.61 | 0.92 | -0.16 | 0.61 | 0.91 |
| Phascolarctobacterium       | 0.22  | 0.13 | 0.41 | 0.23  | 0.09 | 0.51 | 0.26  | 0.08 | 0.64 | 0.24  | 0.10 | 0.75 | 0.24  | 0.11 | 0.80 |
| Phocaea                     | -0.61 | 0.09 | 0.38 | -0.69 | 0.05 | 0.49 | -0.77 | 0.03 | 0.52 | -0.75 | 0.04 | 0.54 | -0.72 | 0.05 | 0.56 |
| Prevotella                  | 0.05  | 0.69 | 0.84 | 0.13  | 0.30 | 0.72 | 0.12  | 0.36 | 0.92 | 0.13  | 0.35 | 0.92 | 0.13  | 0.35 | 0.91 |
| Romboutsia                  | 0.25  | 0.29 | 0.58 | 0.32  | 0.16 | 0.60 | 0.25  | 0.31 | 0.92 | 0.26  | 0.28 | 0.92 | 0.27  | 0.28 | 0.91 |
| Roseburia                   | 0.38  | 0.15 | 0.41 | 0.32  | 0.22 | 0.65 | 0.17  | 0.54 | 0.92 | 0.19  | 0.50 | 0.92 | 0.23  | 0.41 | 0.91 |
| Ruminococcus                | 0.42  | 0.02 | 0.19 | 0.30  | 0.08 | 0.50 | 0.20  | 0.26 | 0.92 | 0.20  | 0.28 | 0.92 | 0.18  | 0.33 | 0.91 |
| Sellimonas                  | 0.34  | 0.17 | 0.43 | 0.26  | 0.28 | 0.71 | 0.23  | 0.37 | 0.92 | 0.20  | 0.43 | 0.92 | 0.20  | 0.43 | 0.91 |
| Senegalimassilia            | 0.27  | 0.24 | 0.53 | 0.28  | 0.21 | 0.63 | 0.29  | 0.22 | 0.92 | 0.29  | 0.22 | 0.92 | 0.29  | 0.23 | 0.91 |
| Shuttleworthia              | 0.16  | 0.54 | 0.79 | -0.11 | 0.67 | 0.90 | -0.18 | 0.50 | 0.92 | -0.20 | 0.45 | 0.92 | -0.18 | 0.51 | 0.91 |
| Slackia                     | -0.10 | 0.64 | 0.83 | -0.05 | 0.80 | 0.92 | -0.03 | 0.89 | 0.94 | -0.03 | 0.90 | 0.97 | -0.07 | 0.75 | 0.93 |
| Streptococcus               | 0.23  | 0.45 | 0.75 | 0.22  | 0.46 | 0.83 | 0.31  | 0.33 | 0.92 | 0.30  | 0.35 | 0.92 | 0.32  | 0.32 | 0.91 |
| Subdoligranulum             | 0.79  | 0.00 | 0.02 | 0.69  | 0.00 | 0.07 | 0.56  | 0.02 | 0.44 | 0.55  | 0.02 | 0.44 | 0.57  | 0.01 | 0.51 |
| Sutterella                  | -0.07 | 0.59 | 0.82 | 0.03  | 0.84 | 0.92 | 0.02  | 0.86 | 0.94 | 0.02  | 0.87 | 0.96 | 0.04  | 0.78 | 0.93 |
| TM7x                        | -0.15 | 0.62 | 0.83 | -0.30 | 0.31 | 0.72 | -0.21 | 0.51 | 0.92 | -0.21 | 0.50 | 0.92 | -0.20 | 0.54 | 0.91 |
| Turicibacter                | 0.52  | 0.10 | 0.38 | 0.66  | 0.03 | 0.40 | 0.72  | 0.03 | 0.47 | 0.73  | 0.02 | 0.45 | 0.70  | 0.03 | 0.56 |
| Tuzzerella                  | 0.15  | 0.48 | 0.75 | 0.21  | 0.32 | 0.72 | 0.15  | 0.50 | 0.92 | 0.14  | 0.53 | 0.92 | 0.14  | 0.55 | 0.91 |
| UBA1819                     | -0.24 | 0.46 | 0.75 | -0.28 | 0.37 | 0.81 | -0.23 | 0.49 | 0.92 | -0.29 | 0.40 | 0.92 | -0.30 | 0.40 | 0.91 |
| UCG.002                     | 0.14  | 0.36 | 0.68 | 0.03  | 0.84 | 0.92 | -0.05 | 0.78 | 0.94 | -0.07 | 0.70 | 0.93 | -0.07 | 0.69 | 0.91 |
| UCG.003                     | 0.31  | 0.08 | 0.38 | 0.18  | 0.30 | 0.72 | 0.11  | 0.56 | 0.92 | 0.11  | 0.57 | 0.92 | 0.08  | 0.66 | 0.91 |
| UCG.005                     | 0.38  | 0.06 | 0.38 | 0.26  | 0.17 | 0.60 | 0.16  | 0.44 | 0.92 | 0.14  | 0.51 | 0.92 | 0.12  | 0.59 | 0.91 |
| UCG.009                     | 0.00  | 0.99 | 0.99 | -0.23 | 0.45 | 0.82 | -0.34 | 0.28 | 0.92 | -0.35 | 0.27 | 0.92 | -0.36 | 0.25 | 0.91 |
| Veillonella                 | 0.12  | 0.57 | 0.81 | 0.11  | 0.59 | 0.86 | 0.08  | 0.73 | 0.94 | 0.09  | 0.69 | 0.93 | 0.12  | 0.61 | 0.91 |
| Victivallis                 | 0.25  | 0.26 | 0.53 | 0.13  | 0.53 | 0.85 | 0.00  | 1.00 | 1.00 | -0.02 | 0.94 | 0.97 | -0.01 | 0.98 | 0.99 |

Multivariable-adjusted regression models adjusted for:

Model 1: sequencing batch, age, race, gender, study center

Model 2: Model 1, with education

Model 3: Model 2, with physical activity, diet score, medication use, and smoking

Model 4: Model 3 with BMI

Model 5: Model 4 with hypertension and diabetes

eTable 16: Multivariable-adjusted regression coefficients, p-values, and false discovery rate (FDR)-adjusted p-values for genera with respect to letter fluency.

|                               | Model1 |         |      | Model2 |         |      | Model3 |         |      | Model4 |         |      | Model5 |         |      |
|-------------------------------|--------|---------|------|--------|---------|------|--------|---------|------|--------|---------|------|--------|---------|------|
|                               | beta   | p-value | FDR  | beta   | p-value | FDR  | beta   | p-value | FDR  | beta   | p-value | FDR  | beta   | p-value | FDR  |
| Acetanaerobacterium           | 0.41   | 0.70    | 0.98 | 0.79   | 0.45    | 0.96 | 0.86   | 0.43    | 0.98 | 0.84   | 0.44    | 0.98 | 0.72   | 0.51    | 0.98 |
| Acidaminococcus               | -0.70  | 0.04    | 0.53 | -0.44  | 0.19    | 0.84 | -0.30  | 0.41    | 0.98 | -0.29  | 0.43    | 0.98 | -0.29  | 0.43    | 0.98 |
| Actinomyces                   | -0.09  | 0.92    | 0.98 | 0.12   | 0.90    | 0.96 | 0.66   | 0.50    | 0.98 | 0.66   | 0.50    | 0.98 | 0.77   | 0.43    | 0.98 |
| Adlercreutzia                 | -0.72  | 0.20    | 0.68 | -0.82  | 0.14    | 0.84 | -0.89  | 0.12    | 0.98 | -0.91  | 0.12    | 0.98 | -0.95  | 0.10    | 0.98 |
| Agathobacter                  | 0.16   | 0.83    | 0.98 | 0.10   | 0.89    | 0.96 | -0.24  | 0.74    | 0.98 | -0.19  | 0.80    | 0.98 | -0.11  | 0.88    | 0.98 |
| Akkermansia                   | 0.06   | 0.87    | 0.98 | -0.14  | 0.69    | 0.96 | -0.24  | 0.53    | 0.98 | -0.24  | 0.53    | 0.98 | -0.29  | 0.45    | 0.98 |
| Alistipes                     | 0.81   | 0.18    | 0.68 | 0.61   | 0.30    | 0.96 | 0.19   | 0.76    | 0.98 | 0.19   | 0.76    | 0.98 | 0.13   | 0.83    | 0.98 |
| Allisonella                   | 0.09   | 0.90    | 0.98 | 0.84   | 0.23    | 0.86 | 1.02   | 0.17    | 0.98 | 1.04   | 0.16    | 0.98 | 1.10   | 0.14    | 0.98 |
| Anaerofilum                   | 0.74   | 0.35    | 0.79 | 0.11   | 0.89    | 0.96 | 0.03   | 0.97    | 0.98 | 0.00   | 1.00    | 1.00 | -0.07  | 0.93    | 0.98 |
| Anaerostipes                  | -0.52  | 0.55    | 0.94 | -0.80  | 0.34    | 0.96 | -0.49  | 0.58    | 0.98 | -0.49  | 0.57    | 0.98 | -0.40  | 0.65    | 0.98 |
| Anaerotruncus                 | -0.18  | 0.80    | 0.98 | -0.40  | 0.58    | 0.96 | -0.37  | 0.62    | 0.98 | -0.44  | 0.56    | 0.98 | -0.48  | 0.53    | 0.98 |
| Bacteroides                   | 0.16   | 0.90    | 0.98 | -0.12  | 0.93    | 0.96 | -0.18  | 0.89    | 0.98 | -0.12  | 0.93    | 0.98 | -0.14  | 0.91    | 0.98 |
| Barnesiella                   | 1.03   | 0.00    | 0.27 | 1.04   | 0.00    | 0.18 | 0.91   | 0.01    | 0.96 | 0.91   | 0.01    | 0.98 | 0.92   | 0.01    | 0.88 |
| Bifidobacterium               | -0.08  | 0.85    | 0.98 | 0.25   | 0.57    | 0.96 | 0.16   | 0.71    | 0.98 | 0.18   | 0.69    | 0.98 | 0.17   | 0.71    | 0.98 |
| Bilophila                     | 1.04   | 0.03    | 0.53 | 0.87   | 0.06    | 0.84 | 0.84   | 0.07    | 0.98 | 0.86   | 0.07    | 0.98 | 0.78   | 0.10    | 0.98 |
| Blautia                       | -1.97  | 0.22    | 0.68 | -2.50  | 0.11    | 0.84 | -2.21  | 0.17    | 0.98 | -2.25  | 0.16    | 0.98 | -2.01  | 0.22    | 0.98 |
| Butyricoccus                  | 0.20   | 0.85    | 0.98 | -0.64  | 0.55    | 0.96 | -1.16  | 0.30    | 0.98 | -1.15  | 0.30    | 0.98 | -1.10  | 0.32    | 0.98 |
| Butyrivimonas                 | 0.50   | 0.21    | 0.68 | 0.36   | 0.35    | 0.96 | 0.33   | 0.41    | 0.98 | 0.34   | 0.40    | 0.98 | 0.32   | 0.42    | 0.98 |
| CAG.56                        | 0.39   | 0.39    | 0.83 | 0.22   | 0.62    | 0.96 | 0.27   | 0.56    | 0.98 | 0.28   | 0.56    | 0.98 | 0.28   | 0.55    | 0.98 |
| Candidatus_Soleaferrea        | -0.26  | 0.78    | 0.98 | -0.56  | 0.54    | 0.96 | -0.35  | 0.71    | 0.98 | -0.35  | 0.70    | 0.98 | -0.42  | 0.65    | 0.98 |
| Caproiciproducens             | 0.49   | 0.53    | 0.94 | 0.51   | 0.51    | 0.96 | 0.09   | 0.92    | 0.98 | 0.07   | 0.93    | 0.98 | -0.01  | 0.99    | 1.00 |
| Christensenellaceae_R.7_group | 0.55   | 0.15    | 0.68 | 0.32   | 0.39    | 0.96 | 0.06   | 0.89    | 0.98 | 0.03   | 0.94    | 0.98 | 0.01   | 0.98    | 1.00 |
| Clostridium_sensu_stricto_1   | 0.21   | 0.66    | 0.98 | 0.31   | 0.52    | 0.96 | 0.33   | 0.51    | 0.98 | 0.32   | 0.51    | 0.98 | 0.24   | 0.64    | 0.98 |
| Colidextribacter              | 0.32   | 0.74    | 0.98 | 0.00   | 1.00    | 1.00 | -0.41  | 0.68    | 0.98 | -0.43  | 0.66    | 0.98 | -0.34  | 0.73    | 0.98 |
| Collinsella                   | -0.24  | 0.58    | 0.94 | 0.16   | 0.70    | 0.96 | 0.06   | 0.90    | 0.98 | 0.07   | 0.88    | 0.98 | 0.02   | 0.96    | 0.99 |
| Coprobacter                   | 0.90   | 0.06    | 0.53 | 0.69   | 0.13    | 0.84 | 0.37   | 0.45    | 0.98 | 0.36   | 0.46    | 0.98 | 0.36   | 0.46    | 0.98 |
| Coprococcus                   | 0.78   | 0.13    | 0.68 | 0.74   | 0.14    | 0.84 | 0.71   | 0.17    | 0.98 | 0.71   | 0.17    | 0.98 | 0.73   | 0.16    | 0.98 |
| Defluviitaleaceae_UCG.011     | 0.36   | 0.63    | 0.97 | 0.10   | 0.89    | 0.96 | 0.08   | 0.91    | 0.98 | 0.03   | 0.96    | 0.98 | -0.08  | 0.92    | 0.98 |
| Desulfovibrio                 | -0.18  | 0.67    | 0.98 | -0.12  | 0.77    | 0.96 | -0.20  | 0.65    | 0.98 | -0.23  | 0.60    | 0.98 | -0.23  | 0.61    | 0.98 |
| Dialister                     | -0.36  | 0.28    | 0.73 | -0.34  | 0.29    | 0.96 | -0.13  | 0.71    | 0.98 | -0.12  | 0.73    | 0.98 | -0.11  | 0.75    | 0.98 |
| DNF00809                      | -0.62  | 0.46    | 0.87 | -0.80  | 0.32    | 0.96 | -0.89  | 0.29    | 0.98 | -0.92  | 0.28    | 0.98 | -0.96  | 0.26    | 0.98 |
| Dorea                         | -0.18  | 0.78    | 0.98 | -0.07  | 0.92    | 0.96 | 0.02   | 0.98    | 0.98 | 0.03   | 0.96    | 0.98 | 0.00   | 1.00    | 1.00 |
| DTU089                        | 0.35   | 0.61    | 0.96 | 0.23   | 0.73    | 0.96 | 0.03   | 0.97    | 0.98 | 0.00   | 1.00    | 1.00 | 0.12   | 0.87    | 0.98 |
| Eggerthella                   | -0.90  | 0.16    | 0.68 | -1.04  | 0.10    | 0.84 | -0.69  | 0.30    | 0.98 | -0.71  | 0.28    | 0.98 | -0.62  | 0.35    | 0.98 |
| Eisenbergiella                | -0.94  | 0.16    | 0.68 | -0.94  | 0.15    | 0.84 | -1.05  | 0.12    | 0.98 | -1.13  | 0.10    | 0.98 | -1.00  | 0.14    | 0.98 |
| Erysipelatoclostridium        | -0.42  | 0.55    | 0.94 | -0.40  | 0.56    | 0.96 | -0.47  | 0.50    | 0.98 | -0.52  | 0.47    | 0.98 | -0.50  | 0.49    | 0.98 |
| Erysipelotrichaceae_UCG.003   | 0.40   | 0.43    | 0.87 | 0.33   | 0.50    | 0.96 | 0.11   | 0.83    | 0.98 | 0.10   | 0.85    | 0.98 | 0.04   | 0.94    | 0.98 |
| Escherichia.Shigella          | -0.64  | 0.17    | 0.68 | -0.40  | 0.38    | 0.96 | -0.31  | 0.52    | 0.98 | -0.30  | 0.53    | 0.98 | -0.31  | 0.53    | 0.98 |
| Faecalibacterium              | 0.54   | 0.42    | 0.87 | 0.31   | 0.64    | 0.96 | 0.11   | 0.88    | 0.98 | 0.12   | 0.86    | 0.98 | 0.10   | 0.89    | 0.98 |
| Family_XIII_AD3011_group      | 0.80   | 0.20    | 0.68 | 0.41   | 0.50    | 0.96 | 0.18   | 0.78    | 0.98 | 0.13   | 0.84    | 0.98 | 0.09   | 0.89    | 0.98 |
| Family_XIII_UCG.001           | 0.91   | 0.24    | 0.68 | 0.64   | 0.39    | 0.96 | 0.48   | 0.54    | 0.98 | 0.42   | 0.59    | 0.98 | 0.40   | 0.62    | 0.98 |
| FD2005                        | -0.43  | 0.56    | 0.94 | -0.24  | 0.74    | 0.96 | -0.14  | 0.86    | 0.98 | -0.13  | 0.87    | 0.98 | -0.17  | 0.82    | 0.98 |
| Flavonifractor                | -0.83  | 0.20    | 0.68 | -0.80  | 0.20    | 0.84 | -0.74  | 0.27    | 0.98 | -0.73  | 0.27    | 0.98 | -0.71  | 0.29    | 0.98 |
| Fourniereella                 | 0.11   | 0.87    | 0.98 | 0.05   | 0.95    | 0.96 | -0.27  | 0.71    | 0.98 | -0.31  | 0.67    | 0.98 | -0.29  | 0.69    | 0.98 |
| Frisingicoccus                | 0.07   | 0.89    | 0.98 | -0.10  | 0.85    | 0.96 | -0.32  | 0.56    | 0.98 | -0.34  | 0.53    | 0.98 | -0.30  | 0.59    | 0.98 |
| Fusicatenibacter              | 0.28   | 0.59    | 0.94 | 0.08   | 0.88    | 0.96 | -0.13  | 0.81    | 0.98 | -0.09  | 0.87    | 0.98 | -0.18  | 0.75    | 0.98 |
| Fusobacterium                 | 0.78   | 0.33    | 0.76 | 1.02   | 0.19    | 0.84 | 1.30   | 0.11    | 0.98 | 1.27   | 0.11    | 0.98 | 1.27   | 0.12    | 0.98 |
| GCA.900066575                 | 1.07   | 0.12    | 0.68 | 0.66   | 0.33    | 0.96 | 0.39   | 0.59    | 0.98 | 0.34   | 0.64    | 0.98 | 0.21   | 0.77    | 0.98 |
| Gordonibacter                 | 0.57   | 0.43    | 0.87 | 0.32   | 0.64    | 0.96 | 0.25   | 0.73    | 0.98 | 0.20   | 0.79    | 0.98 | 0.18   | 0.81    | 0.98 |
| Granulicatella                | 0.07   | 0.94    | 0.98 | 0.14   | 0.88    | 0.96 | 0.60   | 0.53    | 0.98 | 0.63   | 0.52    | 0.98 | 0.77   | 0.43    | 0.98 |
| Haemophilus                   | 0.46   | 0.37    | 0.81 | 0.30   | 0.55    | 0.96 | 0.21   | 0.70    | 0.98 | 0.20   | 0.70    | 0.98 | 0.24   | 0.66    | 0.98 |
| Harryflintia                  | -0.86  | 0.28    | 0.73 | -0.98  | 0.20    | 0.84 | -1.12  | 0.17    | 0.98 | -1.16  | 0.16    | 0.98 | -1.34  | 0.10    | 0.98 |
| Holdemanela                   | 0.13   | 0.80    | 0.98 | 0.26   | 0.61    | 0.96 | 0.62   | 0.24    | 0.98 | 0.64   | 0.23    | 0.98 | 0.68   | 0.20    | 0.98 |

|                               |       |      |      |       |      |      |       |      |      |       |      |      |       |      |      |
|-------------------------------|-------|------|------|-------|------|------|-------|------|------|-------|------|------|-------|------|------|
| Holdemania                    | 0.10  | 0.94 | 0.98 | 0.07  | 0.95 | 0.96 | 0.23  | 0.86 | 0.98 | 0.17  | 0.89 | 0.98 | -0.16 | 0.90 | 0.98 |
| Hungatella                    | -1.34 | 0.04 | 0.53 | -1.20 | 0.06 | 0.84 | -1.17 | 0.07 | 0.98 | -1.18 | 0.07 | 0.98 | -1.05 | 0.11 | 0.98 |
| Hydrogenoanaerobacterium      | 1.48  | 0.03 | 0.53 | 1.00  | 0.14 | 0.84 | 0.83  | 0.25 | 0.98 | 0.78  | 0.28 | 0.98 | 0.75  | 0.31 | 0.98 |
| Incertae_Sedis                | 0.49  | 0.65 | 0.98 | 0.61  | 0.56 | 0.96 | 0.71  | 0.52 | 0.98 | 0.70  | 0.53 | 0.98 | 0.72  | 0.51 | 0.98 |
| Intestinibacter               | 0.02  | 0.98 | 0.99 | 0.27  | 0.65 | 0.96 | 0.17  | 0.78 | 0.98 | 0.22  | 0.73 | 0.98 | 0.27  | 0.67 | 0.98 |
| Intestinimonas                | 0.45  | 0.44 | 0.87 | 0.06  | 0.91 | 0.96 | -0.03 | 0.96 | 0.98 | -0.07 | 0.90 | 0.98 | 0.04  | 0.95 | 0.98 |
| Lachnoclostridium             | -2.04 | 0.10 | 0.63 | -1.34 | 0.27 | 0.93 | -0.34 | 0.79 | 0.98 | -0.29 | 0.82 | 0.98 | -0.18 | 0.89 | 0.98 |
| Lachnospira                   | 1.17  | 0.05 | 0.53 | 0.60  | 0.32 | 0.96 | 0.37  | 0.56 | 0.98 | 0.39  | 0.53 | 0.98 | 0.42  | 0.51 | 0.98 |
| Lachnospiraceae_FCS020_group  | 1.59  | 0.01 | 0.53 | 1.10  | 0.08 | 0.84 | 1.06  | 0.11 | 0.98 | 1.06  | 0.11 | 0.98 | 1.02  | 0.13 | 0.98 |
| Lachnospiraceae_ND3007_group  | 0.78  | 0.06 | 0.53 | 0.52  | 0.21 | 0.84 | 0.43  | 0.32 | 0.98 | 0.45  | 0.30 | 0.98 | 0.42  | 0.34 | 0.98 |
| Lachnospiraceae_NK4A136_group | 0.44  | 0.47 | 0.88 | -0.04 | 0.95 | 0.96 | -0.56 | 0.39 | 0.98 | -0.56 | 0.39 | 0.98 | -0.56 | 0.39 | 0.98 |
| Lachnospiraceae_UCG.001       | -0.01 | 0.98 | 0.99 | -0.17 | 0.71 | 0.96 | -0.28 | 0.54 | 0.98 | -0.31 | 0.52 | 0.98 | -0.33 | 0.49 | 0.98 |
| Lachnospiraceae_UCG.004       | 0.38  | 0.46 | 0.87 | 0.21  | 0.67 | 0.96 | 0.27  | 0.60 | 0.98 | 0.28  | 0.58 | 0.98 | 0.14  | 0.79 | 0.98 |
| Lachnospiraceae_UCG.010       | -0.09 | 0.90 | 0.98 | -0.45 | 0.52 | 0.96 | -0.50 | 0.49 | 0.98 | -0.54 | 0.46 | 0.98 | -0.55 | 0.45 | 0.98 |
| Lactobacillus                 | -0.70 | 0.23 | 0.68 | -0.23 | 0.69 | 0.96 | -0.31 | 0.61 | 0.98 | -0.28 | 0.65 | 0.98 | -0.26 | 0.68 | 0.98 |
| Lactococcus                   | 0.82  | 0.30 | 0.76 | 0.63  | 0.41 | 0.96 | 0.86  | 0.29 | 0.98 | 0.84  | 0.30 | 0.98 | 0.72  | 0.38 | 0.98 |
| Marvinbryantia                | 0.03  | 0.94 | 0.98 | -0.19 | 0.68 | 0.96 | -0.28 | 0.56 | 0.98 | -0.29 | 0.55 | 0.98 | -0.25 | 0.62 | 0.98 |
| Megasphaera                   | -0.23 | 0.58 | 0.94 | 0.11  | 0.80 | 0.96 | 0.49  | 0.26 | 0.98 | 0.50  | 0.26 | 0.98 | 0.47  | 0.29 | 0.98 |
| Monoglobus                    | 1.04  | 0.09 | 0.63 | 0.81  | 0.18 | 0.84 | 0.74  | 0.25 | 0.98 | 0.73  | 0.26 | 0.98 | 0.71  | 0.28 | 0.98 |
| Moryella                      | 0.83  | 0.31 | 0.76 | 0.43  | 0.59 | 0.96 | 0.08  | 0.93 | 0.98 | 0.08  | 0.93 | 0.98 | 0.06  | 0.94 | 0.98 |
| Negativibacillus              | 0.05  | 0.92 | 0.98 | 0.11  | 0.83 | 0.96 | -0.09 | 0.86 | 0.98 | -0.10 | 0.86 | 0.98 | -0.18 | 0.74 | 0.98 |
| NK4A214_group                 | 0.12  | 0.76 | 0.98 | -0.08 | 0.84 | 0.96 | -0.34 | 0.42 | 0.98 | -0.36 | 0.39 | 0.98 | -0.37 | 0.38 | 0.98 |
| Odoribacter                   | 0.95  | 0.01 | 0.53 | 0.85  | 0.03 | 0.78 | 0.50  | 0.21 | 0.98 | 0.50  | 0.22 | 0.98 | 0.45  | 0.27 | 0.98 |
| Oscillibacter                 | 0.17  | 0.80 | 0.98 | -0.05 | 0.94 | 0.96 | -0.01 | 0.98 | 0.98 | -0.06 | 0.93 | 0.98 | -0.13 | 0.85 | 0.98 |
| Oscillospira                  | 1.14  | 0.23 | 0.68 | 1.15  | 0.21 | 0.84 | 1.05  | 0.26 | 0.98 | 1.04  | 0.27 | 0.98 | 1.13  | 0.24 | 0.98 |
| Oxalobacter                   | 0.92  | 0.17 | 0.68 | 0.34  | 0.61 | 0.96 | 0.06  | 0.94 | 0.98 | 0.05  | 0.95 | 0.98 | 0.09  | 0.89 | 0.98 |
| Paludicola                    | 0.89  | 0.20 | 0.68 | 0.40  | 0.56 | 0.96 | 0.11  | 0.88 | 0.98 | 0.04  | 0.96 | 0.98 | 0.17  | 0.82 | 0.98 |
| Parabacteroides               | 0.70  | 0.15 | 0.68 | 0.93  | 0.05 | 0.84 | 0.77  | 0.12 | 0.98 | 0.78  | 0.11 | 0.98 | 0.79  | 0.11 | 0.98 |
| Paraprevotella                | 0.06  | 0.86 | 0.98 | 0.19  | 0.59 | 0.96 | 0.10  | 0.78 | 0.98 | 0.09  | 0.81 | 0.98 | 0.09  | 0.80 | 0.98 |
| Parasutterella                | 0.67  | 0.07 | 0.53 | 0.59  | 0.10 | 0.84 | 0.38  | 0.32 | 0.98 | 0.39  | 0.31 | 0.98 | 0.30  | 0.44 | 0.98 |
| Peptococcus                   | 0.17  | 0.81 | 0.98 | -0.21 | 0.77 | 0.96 | -0.73 | 0.32 | 0.98 | -0.77 | 0.30 | 0.98 | -0.71 | 0.34 | 0.98 |
| Phascolarctobacterium         | 0.78  | 0.03 | 0.53 | 0.83  | 0.02 | 0.78 | 0.81  | 0.02 | 0.98 | 0.79  | 0.03 | 0.98 | 0.82  | 0.02 | 0.98 |
| Phoceia                       | -0.02 | 0.98 | 0.99 | -0.21 | 0.81 | 0.96 | -0.25 | 0.78 | 0.98 | -0.22 | 0.80 | 0.98 | -0.25 | 0.78 | 0.98 |
| Prevotella                    | -0.23 | 0.48 | 0.88 | -0.05 | 0.89 | 0.96 | -0.14 | 0.66 | 0.98 | -0.14 | 0.66 | 0.98 | -0.13 | 0.69 | 0.98 |
| Romboutsia                    | 0.12  | 0.83 | 0.98 | 0.30  | 0.59 | 0.96 | 0.23  | 0.69 | 0.98 | 0.25  | 0.66 | 0.98 | 0.21  | 0.73 | 0.98 |
| Roseburia                     | 0.46  | 0.49 | 0.89 | 0.29  | 0.65 | 0.96 | 0.04  | 0.96 | 0.98 | 0.05  | 0.94 | 0.98 | 0.11  | 0.87 | 0.98 |
| Ruminococcus                  | 0.13  | 0.76 | 0.98 | -0.15 | 0.71 | 0.96 | -0.35 | 0.43 | 0.98 | -0.37 | 0.41 | 0.98 | -0.40 | 0.38 | 0.98 |
| Sellimonas                    | 0.69  | 0.26 | 0.70 | 0.52  | 0.38 | 0.96 | 0.22  | 0.72 | 0.98 | 0.18  | 0.77 | 0.98 | 0.20  | 0.75 | 0.98 |
| Senegalimassilia              | 0.70  | 0.22 | 0.68 | 0.73  | 0.19 | 0.84 | 0.70  | 0.23 | 0.98 | 0.69  | 0.23 | 0.98 | 0.70  | 0.23 | 0.98 |
| Shuttleworthia                | 0.00  | 1.00 | 1.00 | -0.60 | 0.34 | 0.96 | -0.79 | 0.23 | 0.98 | -0.83 | 0.21 | 0.98 | -0.76 | 0.25 | 0.98 |
| Slackia                       | -0.07 | 0.90 | 0.98 | 0.06  | 0.90 | 0.96 | 0.04  | 0.94 | 0.98 | 0.05  | 0.93 | 0.98 | -0.05 | 0.93 | 0.98 |
| Streptococcus                 | -0.85 | 0.25 | 0.70 | -0.86 | 0.23 | 0.86 | -0.31 | 0.68 | 0.98 | -0.33 | 0.67 | 0.98 | -0.32 | 0.68 | 0.98 |
| Subdoligranulum               | 0.83  | 0.13 | 0.68 | 0.60  | 0.27 | 0.93 | 0.25  | 0.66 | 0.98 | 0.24  | 0.68 | 0.98 | 0.23  | 0.68 | 0.98 |
| Sutterella                    | -0.18 | 0.59 | 0.94 | 0.06  | 0.86 | 0.96 | 0.02  | 0.95 | 0.98 | 0.02  | 0.95 | 0.98 | 0.03  | 0.93 | 0.98 |
| TM7x                          | -1.27 | 0.10 | 0.63 | -1.63 | 0.03 | 0.78 | -1.16 | 0.14 | 0.98 | -1.16 | 0.13 | 0.98 | -1.13 | 0.15 | 0.98 |
| Turicibacter                  | 0.75  | 0.33 | 0.76 | 1.08  | 0.15 | 0.84 | 1.24  | 0.11 | 0.98 | 1.25  | 0.11 | 0.98 | 1.09  | 0.17 | 0.98 |
| Tuzzerella                    | -0.06 | 0.90 | 0.98 | 0.03  | 0.95 | 0.96 | -0.27 | 0.63 | 0.98 | -0.28 | 0.62 | 0.98 | -0.36 | 0.51 | 0.98 |
| UBA1819                       | 0.31  | 0.70 | 0.98 | 0.19  | 0.81 | 0.96 | 0.35  | 0.67 | 0.98 | 0.29  | 0.73 | 0.98 | 0.33  | 0.70 | 0.98 |
| UCG.002                       | 0.39  | 0.32 | 0.76 | 0.14  | 0.71 | 0.96 | -0.23 | 0.57 | 0.98 | -0.26 | 0.53 | 0.98 | -0.28 | 0.50 | 0.98 |
| UCG.003                       | 0.87  | 0.05 | 0.53 | 0.58  | 0.18 | 0.84 | 0.40  | 0.39 | 0.98 | 0.39  | 0.39 | 0.98 | 0.31  | 0.50 | 0.98 |
| UCG.005                       | 0.90  | 0.07 | 0.53 | 0.66  | 0.17 | 0.84 | 0.42  | 0.41 | 0.98 | 0.39  | 0.45 | 0.98 | 0.36  | 0.49 | 0.98 |
| UCG.009                       | 0.12  | 0.87 | 0.98 | -0.38 | 0.60 | 0.96 | -0.89 | 0.24 | 0.98 | -0.91 | 0.24 | 0.98 | -0.92 | 0.23 | 0.98 |
| Veillonella                   | 0.04  | 0.94 | 0.98 | 0.04  | 0.93 | 0.96 | 0.19  | 0.73 | 0.98 | 0.21  | 0.71 | 0.98 | 0.22  | 0.69 | 0.98 |
| Victivallis                   | 0.53  | 0.33 | 0.76 | 0.27  | 0.61 | 0.96 | -0.21 | 0.70 | 0.98 | -0.24 | 0.67 | 0.98 | -0.19 | 0.74 | 0.98 |

Multivariable-adjusted regression models adjusted for:  
Model 1: sequencing batch, age, race, gender, study center  
Model 2: Model 1, with education

Model 3: Model 2, with physical activity, diet score, medication use, and smoking

Model 4: Model 3 with BMI

Model 5: Model 4 with hypertension and diabetes

eTable 17: Multivariable-adjusted regression coefficients, p-values, and false discovery rate (FDR)-adjusted p-values for genera with respect to MOCA.

|                               | Model1 |         |      | Model2 |         |      | Model3 |         |      | Model4 |         |      | Model5 |         |      |
|-------------------------------|--------|---------|------|--------|---------|------|--------|---------|------|--------|---------|------|--------|---------|------|
|                               | beta   | p-value | FDR  | beta   | p-value | FDR  | beta   | p-value | FDR  | beta   | p-value | FDR  | beta   | p-value | FDR  |
| Acetanaerobacterium           | -0.31  | 0.28    | 0.50 | -0.15  | 0.58    | 0.79 | -0.25  | 0.35    | 0.76 | -0.26  | 0.35    | 0.76 | -0.28  | 0.31    | 0.76 |
| Acidaminococcus               | -0.29  | 0.00    | 0.03 | -0.18  | 0.04    | 0.46 | -0.17  | 0.06    | 0.60 | -0.17  | 0.06    | 0.62 | -0.16  | 0.08    | 0.71 |
| Actinomyces                   | -0.14  | 0.58    | 0.71 | -0.05  | 0.84    | 0.94 | 0.03   | 0.91    | 0.97 | 0.03   | 0.92    | 0.98 | 0.08   | 0.74    | 0.89 |
| Adlercreutzia                 | 0.01   | 0.95    | 0.97 | -0.03  | 0.84    | 0.94 | -0.08  | 0.58    | 0.80 | -0.08  | 0.58    | 0.80 | -0.08  | 0.59    | 0.79 |
| Agathobacter                  | -0.26  | 0.18    | 0.40 | -0.29  | 0.10    | 0.62 | -0.32  | 0.07    | 0.61 | -0.32  | 0.08    | 0.64 | -0.30  | 0.10    | 0.75 |
| Akkermansia                   | 0.21   | 0.03    | 0.17 | 0.13   | 0.17    | 0.63 | 0.09   | 0.33    | 0.76 | 0.09   | 0.33    | 0.76 | 0.08   | 0.41    | 0.76 |
| Alistipes                     | 0.26   | 0.11    | 0.31 | 0.17   | 0.25    | 0.65 | 0.08   | 0.61    | 0.80 | 0.08   | 0.61    | 0.80 | 0.06   | 0.70    | 0.88 |
| Allisonella                   | -0.33  | 0.09    | 0.28 | -0.03  | 0.88    | 0.94 | -0.05  | 0.78    | 0.89 | -0.05  | 0.79    | 0.89 | -0.06  | 0.74    | 0.89 |
| Anaerofilum                   | 0.15   | 0.48    | 0.66 | -0.12  | 0.57    | 0.79 | -0.13  | 0.53    | 0.80 | -0.13  | 0.52    | 0.79 | -0.13  | 0.54    | 0.79 |
| Anaerostipes                  | 0.24   | 0.30    | 0.52 | 0.12   | 0.57    | 0.79 | 0.11   | 0.60    | 0.80 | 0.11   | 0.60    | 0.80 | 0.14   | 0.51    | 0.79 |
| Anaerotruncus                 | 0.20   | 0.32    | 0.54 | 0.12   | 0.53    | 0.79 | 0.19   | 0.31    | 0.76 | 0.19   | 0.32    | 0.76 | 0.19   | 0.32    | 0.76 |
| Bacteroides                   | 0.02   | 0.96    | 0.97 | -0.09  | 0.79    | 0.91 | -0.10  | 0.75    | 0.89 | -0.10  | 0.76    | 0.89 | -0.09  | 0.78    | 0.91 |
| Barnesiella                   | 0.16   | 0.08    | 0.28 | 0.16   | 0.06    | 0.53 | 0.19   | 0.04    | 0.51 | 0.18   | 0.04    | 0.52 | 0.20   | 0.03    | 0.43 |
| Bifidobacterium               | -0.11  | 0.34    | 0.54 | 0.02   | 0.89    | 0.94 | 0.01   | 0.96    | 0.98 | 0.01   | 0.95    | 0.99 | 0.00   | 0.99    | 0.99 |
| Bilophila                     | 0.15   | 0.24    | 0.46 | 0.08   | 0.49    | 0.79 | 0.01   | 0.97    | 0.98 | 0.01   | 0.96    | 0.99 | 0.01   | 0.92    | 0.96 |
| Blautia                       | -0.04  | 0.92    | 0.97 | -0.24  | 0.55    | 0.79 | -0.10  | 0.80    | 0.89 | -0.11  | 0.79    | 0.89 | 0.05   | 0.91    | 0.96 |
| Butyricoccus                  | 0.30   | 0.30    | 0.52 | -0.04  | 0.89    | 0.94 | -0.20  | 0.48    | 0.76 | -0.20  | 0.48    | 0.76 | -0.21  | 0.46    | 0.79 |
| Butyricimonas                 | 0.15   | 0.17    | 0.40 | 0.09   | 0.39    | 0.74 | 0.11   | 0.29    | 0.76 | 0.11   | 0.29    | 0.76 | 0.09   | 0.39    | 0.76 |
| CAG.56                        | 0.10   | 0.42    | 0.61 | 0.02   | 0.85    | 0.94 | 0.02   | 0.87    | 0.95 | 0.02   | 0.87    | 0.95 | 0.03   | 0.78    | 0.91 |
| Candidatus_Soleaferrea        | -0.19  | 0.44    | 0.62 | -0.31  | 0.19    | 0.63 | -0.27  | 0.25    | 0.76 | -0.27  | 0.25    | 0.76 | -0.27  | 0.25    | 0.76 |
| Caproiciproducens             | -0.08  | 0.69    | 0.80 | -0.08  | 0.68    | 0.86 | -0.11  | 0.58    | 0.80 | -0.11  | 0.57    | 0.80 | -0.11  | 0.60    | 0.79 |
| Christensenellaceae_R.7_group | 0.28   | 0.01    | 0.07 | 0.18   | 0.06    | 0.53 | 0.18   | 0.07    | 0.61 | 0.18   | 0.08    | 0.64 | 0.19   | 0.07    | 0.71 |
| Clostridium_sensu_stricto_1   | 0.06   | 0.65    | 0.77 | 0.09   | 0.44    | 0.76 | 0.11   | 0.38    | 0.76 | 0.11   | 0.38    | 0.76 | 0.11   | 0.37    | 0.76 |
| Colidextribacter              | -0.17  | 0.52    | 0.69 | -0.30  | 0.22    | 0.63 | -0.21  | 0.39    | 0.76 | -0.22  | 0.39    | 0.76 | -0.17  | 0.50    | 0.79 |
| Collinsella                   | -0.09  | 0.42    | 0.61 | 0.07   | 0.54    | 0.79 | 0.05   | 0.68    | 0.86 | 0.05   | 0.67    | 0.85 | 0.04   | 0.73    | 0.89 |
| Coprobacter                   | 0.09   | 0.48    | 0.66 | 0.01   | 0.91    | 0.94 | -0.03  | 0.80    | 0.89 | -0.03  | 0.79    | 0.89 | -0.03  | 0.83    | 0.91 |
| Coprococcus                   | 0.05   | 0.70    | 0.80 | 0.04   | 0.77    | 0.91 | 0.07   | 0.60    | 0.80 | 0.07   | 0.60    | 0.80 | 0.07   | 0.60    | 0.79 |
| Defluviitaleaceae_UCG.011     | 0.34   | 0.08    | 0.28 | 0.25   | 0.19    | 0.63 | 0.24   | 0.20    | 0.76 | 0.24   | 0.20    | 0.76 | 0.22   | 0.25    | 0.76 |
| Desulfovibrio                 | -0.13  | 0.25    | 0.46 | -0.11  | 0.30    | 0.72 | -0.07  | 0.52    | 0.80 | -0.07  | 0.50    | 0.77 | -0.07  | 0.51    | 0.79 |
| Dialister                     | -0.05  | 0.54    | 0.69 | -0.05  | 0.58    | 0.79 | -0.06  | 0.49    | 0.77 | -0.06  | 0.50    | 0.77 | -0.05  | 0.60    | 0.79 |
| DNF00809                      | 0.19   | 0.39    | 0.58 | 0.12   | 0.56    | 0.79 | 0.28   | 0.19    | 0.76 | 0.28   | 0.20    | 0.76 | 0.28   | 0.19    | 0.76 |
| Dorea                         | 0.02   | 0.92    | 0.97 | 0.06   | 0.70    | 0.87 | 0.10   | 0.55    | 0.80 | 0.10   | 0.54    | 0.80 | 0.09   | 0.57    | 0.79 |
| DTU089                        | 0.16   | 0.38    | 0.57 | 0.11   | 0.52    | 0.79 | 0.13   | 0.45    | 0.76 | 0.13   | 0.46    | 0.76 | 0.14   | 0.42    | 0.76 |
| Eggerthella                   | -0.17  | 0.34    | 0.54 | -0.21  | 0.19    | 0.63 | -0.14  | 0.41    | 0.76 | -0.14  | 0.41    | 0.76 | -0.10  | 0.54    | 0.79 |
| Eisenbergiella                | 0.01   | 0.95    | 0.97 | 0.02   | 0.92    | 0.95 | 0.01   | 0.93    | 0.98 | 0.01   | 0.96    | 0.99 | 0.03   | 0.85    | 0.91 |
| Erysipelatoclostridium        | -0.13  | 0.49    | 0.66 | -0.12  | 0.50    | 0.79 | -0.06  | 0.76    | 0.89 | -0.06  | 0.74    | 0.88 | -0.04  | 0.81    | 0.91 |
| Erysipelotrichaceae_UCG.003   | 0.13   | 0.35    | 0.54 | 0.10   | 0.44    | 0.76 | 0.04   | 0.74    | 0.88 | 0.04   | 0.74    | 0.88 | 0.03   | 0.80    | 0.91 |
| Escherichia.Shigella          | -0.16  | 0.21    | 0.43 | -0.06  | 0.62    | 0.81 | -0.09  | 0.44    | 0.76 | -0.09  | 0.45    | 0.76 | -0.10  | 0.42    | 0.76 |
| Faecalibacterium              | 0.35   | 0.05    | 0.23 | 0.25   | 0.14    | 0.63 | 0.21   | 0.22    | 0.76 | 0.21   | 0.22    | 0.76 | 0.21   | 0.24    | 0.76 |
| Family_XIII_AD3011_group      | 0.37   | 0.03    | 0.16 | 0.21   | 0.19    | 0.63 | 0.22   | 0.19    | 0.76 | 0.21   | 0.20    | 0.76 | 0.21   | 0.22    | 0.76 |
| Family_XIII_UCG.001           | 0.26   | 0.20    | 0.43 | 0.15   | 0.45    | 0.76 | 0.16   | 0.43    | 0.76 | 0.15   | 0.45    | 0.76 | 0.14   | 0.48    | 0.79 |
| FD2005                        | -0.31  | 0.12    | 0.31 | -0.23  | 0.21    | 0.63 | -0.20  | 0.30    | 0.76 | -0.20  | 0.30    | 0.76 | -0.21  | 0.27    | 0.76 |
| Flavonifractor                | -0.16  | 0.35    | 0.54 | -0.15  | 0.36    | 0.74 | -0.06  | 0.71    | 0.86 | -0.06  | 0.71    | 0.86 | -0.03  | 0.85    | 0.91 |
| Fournierella                  | 0.12   | 0.54    | 0.69 | 0.09   | 0.63    | 0.81 | 0.14   | 0.44    | 0.76 | 0.14   | 0.45    | 0.76 | 0.13   | 0.47    | 0.79 |
| Frisingicoccus                | 0.26   | 0.08    | 0.28 | 0.20   | 0.15    | 0.63 | 0.12   | 0.39    | 0.76 | 0.12   | 0.40    | 0.76 | 0.13   | 0.33    | 0.76 |
| Fusicatenibacter              | -0.02  | 0.91    | 0.97 | -0.10  | 0.45    | 0.76 | -0.16  | 0.22    | 0.76 | -0.16  | 0.23    | 0.76 | -0.16  | 0.23    | 0.76 |
| Fusobacterium                 | -0.29  | 0.16    | 0.40 | -0.18  | 0.37    | 0.74 | -0.11  | 0.59    | 0.80 | -0.11  | 0.57    | 0.80 | -0.12  | 0.54    | 0.79 |
| GCA.900066575                 | 0.43   | 0.02    | 0.15 | 0.26   | 0.15    | 0.63 | 0.20   | 0.26    | 0.76 | 0.20   | 0.27    | 0.76 | 0.19   | 0.30    | 0.76 |
| Gordonibacter                 | 0.01   | 0.97    | 0.98 | -0.09  | 0.63    | 0.81 | -0.07  | 0.70    | 0.86 | -0.08  | 0.68    | 0.85 | -0.07  | 0.71    | 0.88 |
| Granulicatella                | -0.24  | 0.34    | 0.54 | -0.21  | 0.38    | 0.74 | -0.25  | 0.29    | 0.76 | -0.25  | 0.30    | 0.76 | -0.25  | 0.31    | 0.76 |
| Haemophilus                   | 0.29   | 0.04    | 0.18 | 0.22   | 0.09    | 0.62 | 0.11   | 0.42    | 0.76 | 0.11   | 0.42    | 0.76 | 0.11   | 0.42    | 0.76 |
| Harryflintia                  | -0.12  | 0.58    | 0.71 | -0.17  | 0.39    | 0.74 | -0.16  | 0.43    | 0.76 | -0.17  | 0.42    | 0.76 | -0.18  | 0.39    | 0.76 |
| Holdemanella                  | -0.07  | 0.62    | 0.76 | -0.02  | 0.88    | 0.94 | 0.10   | 0.47    | 0.76 | 0.10   | 0.46    | 0.76 | 0.11   | 0.40    | 0.76 |
| Holdemania                    | -0.36  | 0.28    | 0.50 | -0.36  | 0.25    | 0.65 | -0.36  | 0.25    | 0.76 | -0.37  | 0.24    | 0.76 | -0.41  | 0.20    | 0.76 |
| Hungatella                    | -0.34  | 0.05    | 0.23 | -0.27  | 0.09    | 0.62 | -0.20  | 0.23    | 0.76 | -0.20  | 0.23    | 0.76 | -0.19  | 0.25    | 0.76 |

|                               |       |      |      |       |      |      |       |      |      |       |      |      |       |      |      |
|-------------------------------|-------|------|------|-------|------|------|-------|------|------|-------|------|------|-------|------|------|
| Hydrogenoanaerobacterium      | 0.43  | 0.02 | 0.15 | 0.22  | 0.22 | 0.63 | 0.18  | 0.32 | 0.76 | 0.18  | 0.33 | 0.76 | 0.20  | 0.28 | 0.76 |
| Incertae_Sedis                | -0.06 | 0.82 | 0.91 | -0.02 | 0.93 | 0.95 | 0.14  | 0.60 | 0.80 | 0.14  | 0.60 | 0.80 | 0.19  | 0.49 | 0.79 |
| Intestinibacter               | 0.16  | 0.35 | 0.54 | 0.26  | 0.09 | 0.62 | 0.26  | 0.10 | 0.76 | 0.27  | 0.10 | 0.73 | 0.29  | 0.07 | 0.71 |
| Intestinimonas                | 0.29  | 0.06 | 0.26 | 0.13  | 0.38 | 0.74 | 0.09  | 0.55 | 0.80 | 0.09  | 0.56 | 0.80 | 0.10  | 0.50 | 0.79 |
| Lachnoclostridium             | -1.05 | 0.00 | 0.03 | -0.74 | 0.02 | 0.39 | -0.69 | 0.03 | 0.51 | -0.69 | 0.03 | 0.52 | -0.68 | 0.03 | 0.47 |
| Lachnospira                   | 0.58  | 0.00 | 0.02 | 0.34  | 0.03 | 0.41 | 0.13  | 0.40 | 0.76 | 0.14  | 0.39 | 0.76 | 0.15  | 0.34 | 0.76 |
| Lachnospiraceae_FCS020_group  | 0.58  | 0.00 | 0.02 | 0.37  | 0.02 | 0.39 | 0.36  | 0.03 | 0.51 | 0.36  | 0.03 | 0.52 | 0.37  | 0.03 | 0.43 |
| Lachnospiraceae_ND3007_group  | 0.15  | 0.19 | 0.42 | 0.03  | 0.76 | 0.91 | 0.04  | 0.70 | 0.86 | 0.04  | 0.68 | 0.85 | 0.05  | 0.68 | 0.87 |
| Lachnospiraceae_NK4A136_group | 0.22  | 0.17 | 0.40 | 0.02  | 0.89 | 0.94 | -0.16 | 0.31 | 0.76 | -0.16 | 0.31 | 0.76 | -0.16 | 0.33 | 0.76 |
| Lachnospiraceae_UCG.001       | 0.20  | 0.10 | 0.29 | 0.14  | 0.22 | 0.63 | 0.02  | 0.85 | 0.94 | 0.02  | 0.87 | 0.95 | 0.03  | 0.82 | 0.91 |
| Lachnospiraceae_UCG.004       | 0.26  | 0.06 | 0.24 | 0.18  | 0.15 | 0.63 | 0.12  | 0.33 | 0.76 | 0.13  | 0.33 | 0.76 | 0.12  | 0.37 | 0.76 |
| Lachnospiraceae_UCG.010       | 0.00  | 1.00 | 1.00 | -0.15 | 0.40 | 0.75 | -0.19 | 0.29 | 0.76 | -0.20 | 0.28 | 0.76 | -0.22 | 0.24 | 0.76 |
| Lactobacillus                 | -0.40 | 0.01 | 0.10 | -0.21 | 0.17 | 0.63 | -0.17 | 0.28 | 0.76 | -0.16 | 0.29 | 0.76 | -0.18 | 0.27 | 0.76 |
| Lactococcus                   | 0.25  | 0.24 | 0.46 | 0.17  | 0.40 | 0.75 | 0.25  | 0.22 | 0.76 | 0.25  | 0.22 | 0.76 | 0.24  | 0.24 | 0.76 |
| Marvinbryantia                | 0.13  | 0.32 | 0.54 | 0.04  | 0.75 | 0.91 | 0.15  | 0.22 | 0.76 | 0.15  | 0.22 | 0.76 | 0.16  | 0.20 | 0.76 |
| Megasphaera                   | -0.34 | 0.00 | 0.04 | -0.21 | 0.05 | 0.53 | -0.12 | 0.29 | 0.76 | -0.12 | 0.29 | 0.76 | -0.12 | 0.29 | 0.76 |
| Monoglobus                    | 0.48  | 0.00 | 0.05 | 0.38  | 0.01 | 0.39 | 0.34  | 0.04 | 0.51 | 0.34  | 0.04 | 0.52 | 0.36  | 0.03 | 0.43 |
| Moryella                      | 0.36  | 0.10 | 0.30 | 0.18  | 0.38 | 0.74 | 0.18  | 0.41 | 0.76 | 0.18  | 0.41 | 0.76 | 0.19  | 0.38 | 0.76 |
| Negativibacillus              | -0.17 | 0.23 | 0.46 | -0.14 | 0.29 | 0.71 | -0.10 | 0.45 | 0.76 | -0.10 | 0.45 | 0.76 | -0.09 | 0.50 | 0.79 |
| NK4A214_group                 | 0.19  | 0.09 | 0.28 | 0.10  | 0.33 | 0.74 | 0.08  | 0.44 | 0.76 | 0.08  | 0.45 | 0.76 | 0.08  | 0.43 | 0.76 |
| Odoribacter                   | 0.14  | 0.18 | 0.40 | 0.09  | 0.36 | 0.74 | 0.07  | 0.50 | 0.77 | 0.07  | 0.50 | 0.77 | 0.06  | 0.55 | 0.79 |
| Oscillibacter                 | 0.26  | 0.15 | 0.38 | 0.17  | 0.32 | 0.74 | 0.19  | 0.29 | 0.76 | 0.18  | 0.30 | 0.76 | 0.20  | 0.25 | 0.76 |
| Oscillospira                  | 0.11  | 0.66 | 0.77 | 0.13  | 0.58 | 0.79 | 0.20  | 0.40 | 0.76 | 0.20  | 0.41 | 0.76 | 0.25  | 0.30 | 0.76 |
| Oxalobacter                   | 0.32  | 0.08 | 0.28 | 0.07  | 0.68 | 0.86 | 0.05  | 0.77 | 0.89 | 0.05  | 0.77 | 0.89 | 0.05  | 0.78 | 0.91 |
| Paludicola                    | 0.41  | 0.03 | 0.16 | 0.21  | 0.23 | 0.63 | 0.16  | 0.36 | 0.76 | 0.16  | 0.38 | 0.76 | 0.19  | 0.31 | 0.76 |
| Parabacteroides               | 0.02  | 0.87 | 0.95 | 0.12  | 0.35 | 0.74 | 0.14  | 0.26 | 0.76 | 0.14  | 0.25 | 0.76 | 0.14  | 0.26 | 0.76 |
| Paraprevotella                | -0.08 | 0.43 | 0.61 | -0.03 | 0.77 | 0.91 | -0.09 | 0.34 | 0.76 | -0.09 | 0.33 | 0.76 | -0.08 | 0.42 | 0.76 |
| Parasutterella                | 0.34  | 0.00 | 0.02 | 0.30  | 0.00 | 0.06 | 0.24  | 0.01 | 0.36 | 0.24  | 0.01 | 0.37 | 0.24  | 0.01 | 0.39 |
| Peptococcus                   | 0.35  | 0.07 | 0.28 | 0.19  | 0.30 | 0.72 | 0.18  | 0.33 | 0.76 | 0.18  | 0.34 | 0.76 | 0.18  | 0.34 | 0.76 |
| Phascolarctobacterium         | 0.15  | 0.12 | 0.31 | 0.16  | 0.06 | 0.53 | 0.17  | 0.06 | 0.60 | 0.17  | 0.06 | 0.62 | 0.15  | 0.10 | 0.75 |
| Phocaea                       | -0.38 | 0.11 | 0.31 | -0.46 | 0.04 | 0.46 | -0.56 | 0.01 | 0.36 | -0.56 | 0.01 | 0.37 | -0.56 | 0.01 | 0.39 |
| Prevotella                    | -0.17 | 0.05 | 0.23 | -0.10 | 0.22 | 0.63 | -0.11 | 0.20 | 0.76 | -0.11 | 0.20 | 0.76 | -0.11 | 0.20 | 0.76 |
| Romboutsia                    | -0.18 | 0.24 | 0.46 | -0.12 | 0.42 | 0.76 | -0.08 | 0.59 | 0.80 | -0.08 | 0.60 | 0.80 | -0.08 | 0.59 | 0.79 |
| Roseburia                     | 0.31  | 0.08 | 0.28 | 0.25  | 0.14 | 0.63 | 0.12  | 0.48 | 0.76 | 0.12  | 0.47 | 0.76 | 0.14  | 0.43 | 0.76 |
| Ruminococcus                  | 0.27  | 0.02 | 0.15 | 0.15  | 0.16 | 0.63 | 0.12  | 0.28 | 0.76 | 0.12  | 0.28 | 0.76 | 0.13  | 0.24 | 0.76 |
| Sellimonas                    | 0.20  | 0.23 | 0.46 | 0.12  | 0.44 | 0.76 | 0.13  | 0.40 | 0.76 | 0.13  | 0.41 | 0.76 | 0.16  | 0.32 | 0.76 |
| Senegalimassilia              | -0.09 | 0.57 | 0.71 | -0.08 | 0.59 | 0.79 | -0.02 | 0.91 | 0.97 | -0.02 | 0.91 | 0.98 | -0.01 | 0.94 | 0.96 |
| Shuttleworthia                | 0.43  | 0.01 | 0.10 | 0.18  | 0.26 | 0.67 | 0.12  | 0.46 | 0.76 | 0.12  | 0.47 | 0.76 | 0.15  | 0.37 | 0.76 |
| Slackia                       | -0.04 | 0.79 | 0.89 | 0.01  | 0.94 | 0.95 | 0.04  | 0.77 | 0.89 | 0.04  | 0.76 | 0.89 | 0.03  | 0.81 | 0.91 |
| Streptococcus                 | 0.26  | 0.19 | 0.41 | 0.25  | 0.18 | 0.63 | 0.31  | 0.11 | 0.76 | 0.31  | 0.12 | 0.76 | 0.31  | 0.12 | 0.76 |
| Subdoligranulum               | 0.42  | 0.00 | 0.05 | 0.32  | 0.02 | 0.39 | 0.35  | 0.01 | 0.36 | 0.35  | 0.01 | 0.37 | 0.36  | 0.01 | 0.39 |
| Sutterella                    | -0.36 | 0.00 | 0.00 | -0.27 | 0.00 | 0.06 | -0.26 | 0.00 | 0.21 | -0.26 | 0.00 | 0.21 | -0.27 | 0.00 | 0.13 |
| TM7x                          | 0.09  | 0.67 | 0.78 | -0.05 | 0.78 | 0.91 | 0.01  | 0.96 | 0.98 | 0.01  | 0.97 | 0.99 | 0.04  | 0.84 | 0.91 |
| Turicibacter                  | 0.14  | 0.49 | 0.66 | 0.28  | 0.16 | 0.63 | 0.38  | 0.06 | 0.60 | 0.38  | 0.06 | 0.62 | 0.36  | 0.07 | 0.71 |
| Tuzzerella                    | -0.02 | 0.88 | 0.95 | 0.03  | 0.83 | 0.94 | 0.00  | 0.98 | 0.99 | 0.00  | 0.99 | 0.99 | -0.01 | 0.92 | 0.96 |
| UBA1819                       | 0.05  | 0.82 | 0.91 | 0.01  | 0.96 | 0.96 | 0.09  | 0.67 | 0.86 | 0.08  | 0.69 | 0.85 | 0.12  | 0.56 | 0.79 |
| UCG.002                       | 0.27  | 0.01 | 0.10 | 0.16  | 0.10 | 0.62 | 0.14  | 0.16 | 0.76 | 0.14  | 0.17 | 0.76 | 0.14  | 0.17 | 0.76 |
| UCG.003                       | 0.19  | 0.12 | 0.31 | 0.06  | 0.58 | 0.79 | 0.01  | 0.92 | 0.97 | 0.01  | 0.92 | 0.98 | -0.01 | 0.96 | 0.97 |
| UCG.005                       | 0.29  | 0.03 | 0.16 | 0.18  | 0.14 | 0.63 | 0.14  | 0.27 | 0.76 | 0.14  | 0.28 | 0.76 | 0.15  | 0.27 | 0.76 |
| UCG.009                       | 0.32  | 0.11 | 0.31 | 0.11  | 0.56 | 0.79 | 0.08  | 0.68 | 0.86 | 0.08  | 0.69 | 0.85 | 0.08  | 0.68 | 0.87 |
| Veillonella                   | 0.09  | 0.55 | 0.70 | 0.08  | 0.56 | 0.79 | 0.00  | 0.99 | 0.99 | 0.00  | 0.98 | 0.99 | -0.01 | 0.93 | 0.96 |
| Victivallis                   | 0.07  | 0.65 | 0.77 | -0.04 | 0.75 | 0.91 | -0.08 | 0.56 | 0.80 | -0.09 | 0.55 | 0.80 | -0.08 | 0.57 | 0.79 |

Multivariable-adjusted regression models adjusted for:

Model 1: sequencing batch, age, race, gender, study center

Model 2: Model 1, with education

Model 3: Model 2, with physical activity, diet score, medication use, and smoking

Model 4: Model 3 with BMI

Model 5: Model 4 with hypertension and diabetes



Table 18: Multivariable-adjusted regression coefficients, p-values, and false discovery rate (FDR)-adjusted p-values for genera with respect to PC (1st).

|                               | Model1 |         |      | Model2 |         |      | Model3 |         |      | Model4 |         |      | Model5 |         |      |
|-------------------------------|--------|---------|------|--------|---------|------|--------|---------|------|--------|---------|------|--------|---------|------|
|                               | beta   | p-value | FDR  | beta   | p-value | FDR  | beta   | p-value | FDR  | beta   | p-value | FDR  | beta   | p-value | FDR  |
| Acetanaerobacterium           | -0.06  | 0.65    | 0.77 | 0.02   | 0.85    | 0.89 | -0.02  | 0.87    | 0.96 | -0.03  | 0.84    | 0.96 | -0.04  | 0.76    | 0.96 |
| Acidaminococcus               | -0.14  | 0.00    | 0.01 | -0.09  | 0.03    | 0.24 | -0.07  | 0.12    | 0.72 | -0.07  | 0.13    | 0.69 | -0.07  | 0.14    | 0.74 |
| Actinomyces                   | -0.10  | 0.37    | 0.56 | -0.06  | 0.59    | 0.83 | 0.02   | 0.89    | 0.97 | 0.02   | 0.89    | 0.97 | 0.03   | 0.79    | 0.96 |
| Adlercreutzia                 | 0.04   | 0.54    | 0.72 | 0.02   | 0.71    | 0.89 | 0.01   | 0.94    | 0.99 | 0.00   | 0.96    | 0.99 | 0.00   | 0.98    | 0.99 |
| Agathobacter                  | -0.01  | 0.91    | 0.94 | -0.03  | 0.75    | 0.89 | -0.09  | 0.28    | 0.85 | -0.08  | 0.32    | 0.96 | -0.07  | 0.39    | 0.96 |
| Akkermansia                   | 0.11   | 0.02    | 0.08 | 0.07   | 0.10    | 0.37 | 0.05   | 0.23    | 0.76 | 0.05   | 0.23    | 0.79 | 0.05   | 0.26    | 0.82 |
| Alistipes                     | 0.15   | 0.04    | 0.13 | 0.11   | 0.11    | 0.38 | 0.05   | 0.54    | 0.94 | 0.05   | 0.54    | 0.96 | 0.04   | 0.60    | 0.96 |
| Allisonella                   | -0.17  | 0.06    | 0.15 | -0.02  | 0.83    | 0.89 | 0.00   | 0.99    | 0.99 | 0.00   | 0.97    | 0.99 | 0.01   | 0.95    | 0.98 |
| Anaerofilum                   | 0.20   | 0.05    | 0.14 | 0.06   | 0.49    | 0.79 | 0.05   | 0.58    | 0.94 | 0.05   | 0.62    | 0.96 | 0.05   | 0.63    | 0.96 |
| Anaerostipes                  | 0.03   | 0.81    | 0.88 | -0.03  | 0.74    | 0.89 | -0.05  | 0.66    | 0.94 | -0.05  | 0.66    | 0.96 | -0.03  | 0.76    | 0.96 |
| Anaerotruncus                 | 0.08   | 0.39    | 0.57 | 0.04   | 0.66    | 0.88 | 0.01   | 0.87    | 0.96 | 0.00   | 0.96    | 0.99 | 0.00   | 0.96    | 0.98 |
| Bacteroides                   | 0.00   | 0.99    | 0.99 | -0.05  | 0.73    | 0.89 | -0.06  | 0.72    | 0.94 | -0.05  | 0.77    | 0.96 | -0.05  | 0.73    | 0.96 |
| Barnesiella                   | 0.17   | 0.00    | 0.00 | 0.17   | 0.00    | 0.00 | 0.15   | 0.00    | 0.02 | 0.15   | 0.00    | 0.02 | 0.16   | 0.00    | 0.01 |
| Bifidobacterium               | -0.03  | 0.59    | 0.73 | 0.04   | 0.50    | 0.79 | 0.02   | 0.70    | 0.94 | 0.02   | 0.66    | 0.96 | 0.02   | 0.67    | 0.96 |
| Bilophila                     | 0.13   | 0.02    | 0.10 | 0.10   | 0.07    | 0.32 | 0.08   | 0.17    | 0.73 | 0.08   | 0.16    | 0.69 | 0.07   | 0.21    | 0.78 |
| Blautia                       | 0.03   | 0.88    | 0.94 | -0.07  | 0.70    | 0.89 | -0.02  | 0.92    | 0.99 | -0.02  | 0.90    | 0.97 | 0.02   | 0.90    | 0.98 |
| Butyricoccus                  | 0.20   | 0.14    | 0.30 | 0.03   | 0.79    | 0.89 | -0.06  | 0.67    | 0.94 | -0.06  | 0.68    | 0.96 | -0.05  | 0.72    | 0.96 |
| Butyricimonas                 | 0.10   | 0.05    | 0.14 | 0.07   | 0.16    | 0.45 | 0.06   | 0.20    | 0.73 | 0.06   | 0.20    | 0.76 | 0.06   | 0.22    | 0.78 |
| CAG.56                        | 0.08   | 0.16    | 0.34 | 0.04   | 0.45    | 0.75 | 0.01   | 0.85    | 0.96 | 0.01   | 0.85    | 0.96 | 0.01   | 0.79    | 0.96 |
| Candidatus_Soleaferrea        | -0.01  | 0.95    | 0.96 | -0.06  | 0.55    | 0.80 | -0.05  | 0.66    | 0.94 | -0.05  | 0.65    | 0.96 | -0.06  | 0.62    | 0.96 |
| Caproiciproducens             | 0.01   | 0.91    | 0.94 | 0.01   | 0.88    | 0.91 | -0.04  | 0.68    | 0.94 | -0.04  | 0.65    | 0.96 | -0.05  | 0.62    | 0.96 |
| Christensenellaceae_R.7_group | 0.16   | 0.00    | 0.01 | 0.11   | 0.01    | 0.14 | 0.08   | 0.12    | 0.72 | 0.07   | 0.14    | 0.69 | 0.08   | 0.13    | 0.74 |
| Clostridium_sensu_stricto_1   | 0.05   | 0.46    | 0.64 | 0.06   | 0.27    | 0.62 | 0.06   | 0.34    | 0.93 | 0.06   | 0.34    | 0.96 | 0.05   | 0.38    | 0.96 |
| Colidextribacter              | -0.10  | 0.43    | 0.61 | -0.16  | 0.15    | 0.45 | -0.16  | 0.18    | 0.73 | -0.16  | 0.17    | 0.69 | -0.14  | 0.24    | 0.78 |
| Collinsella                   | -0.07  | 0.19    | 0.37 | 0.01   | 0.85    | 0.89 | 0.01   | 0.90    | 0.98 | 0.01   | 0.87    | 0.97 | 0.00   | 0.93    | 0.98 |
| Coprobacter                   | 0.06   | 0.28    | 0.48 | 0.02   | 0.66    | 0.88 | -0.02  | 0.70    | 0.94 | -0.02  | 0.67    | 0.96 | -0.02  | 0.67    | 0.96 |
| Coproccoccus                  | 0.10   | 0.12    | 0.27 | 0.09   | 0.12    | 0.40 | 0.08   | 0.19    | 0.73 | 0.08   | 0.19    | 0.75 | 0.09   | 0.16    | 0.74 |
| Defluviitaleaceae_UCG.011     | 0.26   | 0.00    | 0.04 | 0.21   | 0.01    | 0.14 | 0.19   | 0.03    | 0.62 | 0.19   | 0.04    | 0.57 | 0.18   | 0.04    | 0.57 |
| Desulfovibrio                 | -0.04  | 0.51    | 0.69 | -0.03  | 0.61    | 0.83 | -0.03  | 0.52    | 0.94 | -0.04  | 0.45    | 0.96 | -0.04  | 0.48    | 0.96 |
| Dialister                     | -0.02  | 0.59    | 0.73 | -0.02  | 0.63    | 0.85 | -0.01  | 0.73    | 0.94 | -0.01  | 0.75    | 0.96 | -0.01  | 0.81    | 0.96 |
| DNF00809                      | 0.09   | 0.39    | 0.57 | 0.06   | 0.56    | 0.81 | 0.07   | 0.50    | 0.94 | 0.06   | 0.53    | 0.96 | 0.06   | 0.53    | 0.96 |
| Dorea                         | -0.01  | 0.93    | 0.95 | 0.02   | 0.83    | 0.89 | 0.02   | 0.80    | 0.95 | 0.02   | 0.77    | 0.96 | 0.02   | 0.83    | 0.98 |
| DTU089                        | 0.03   | 0.69    | 0.79 | 0.01   | 0.90    | 0.92 | 0.00   | 0.99    | 0.99 | -0.01  | 0.94    | 0.99 | 0.01   | 0.92    | 0.98 |
| Eggerthella                   | -0.04  | 0.61    | 0.74 | -0.06  | 0.40    | 0.70 | -0.02  | 0.80    | 0.95 | -0.02  | 0.78    | 0.96 | -0.01  | 0.89    | 0.98 |
| Eisenbergiella                | -0.05  | 0.56    | 0.73 | -0.05  | 0.54    | 0.80 | -0.04  | 0.60    | 0.94 | -0.05  | 0.52    | 0.96 | -0.04  | 0.62    | 0.96 |
| Erysipelatoclostridium        | -0.07  | 0.43    | 0.61 | -0.06  | 0.45    | 0.75 | -0.03  | 0.71    | 0.94 | -0.04  | 0.65    | 0.96 | -0.03  | 0.69    | 0.96 |
| Erysipelotrichaceae_UCG.003   | 0.07   | 0.24    | 0.43 | 0.06   | 0.31    | 0.62 | 0.02   | 0.73    | 0.94 | 0.02   | 0.74    | 0.96 | 0.02   | 0.77    | 0.96 |
| Escherichia.Shigella          | -0.07  | 0.24    | 0.43 | -0.02  | 0.73    | 0.89 | 0.00   | 0.98    | 0.99 | 0.00   | 0.99    | 0.99 | 0.00   | 0.96    | 0.98 |
| Faecalibacterium              | 0.20   | 0.02    | 0.09 | 0.15   | 0.06    | 0.32 | 0.12   | 0.16    | 0.73 | 0.12   | 0.15    | 0.69 | 0.13   | 0.14    | 0.74 |
| Family_XIII_AD3011_group      | 0.21   | 0.01    | 0.05 | 0.12   | 0.09    | 0.36 | 0.07   | 0.39    | 0.94 | 0.06   | 0.45    | 0.96 | 0.06   | 0.46    | 0.96 |
| Family_XIII_UCG.001           | 0.18   | 0.07    | 0.16 | 0.12   | 0.18    | 0.47 | 0.08   | 0.39    | 0.94 | 0.07   | 0.44    | 0.96 | 0.07   | 0.44    | 0.96 |
| FD2005                        | -0.06  | 0.49    | 0.67 | -0.02  | 0.79    | 0.89 | -0.02  | 0.82    | 0.95 | -0.02  | 0.84    | 0.96 | -0.02  | 0.84    | 0.98 |
| Flavonifractor                | -0.12  | 0.13    | 0.30 | -0.12  | 0.12    | 0.40 | -0.07  | 0.36    | 0.94 | -0.07  | 0.37    | 0.96 | -0.07  | 0.41    | 0.96 |
| Fournierella                  | 0.04   | 0.66    | 0.77 | 0.02   | 0.78    | 0.89 | -0.01  | 0.95    | 0.99 | -0.01  | 0.89    | 0.97 | 0.00   | 0.99    | 0.99 |
| Frisingicoccus                | 0.03   | 0.67    | 0.77 | 0.00   | 1.00    | 1.00 | -0.04  | 0.57    | 0.94 | -0.04  | 0.53    | 0.96 | -0.04  | 0.58    | 0.96 |
| Fusicatenibacter              | 0.06   | 0.38    | 0.56 | 0.02   | 0.79    | 0.89 | -0.02  | 0.74    | 0.94 | -0.02  | 0.81    | 0.96 | -0.02  | 0.74    | 0.96 |
| Fusobacterium                 | -0.11  | 0.28    | 0.48 | -0.05  | 0.60    | 0.83 | 0.03   | 0.73    | 0.94 | 0.03   | 0.77    | 0.96 | 0.03   | 0.78    | 0.96 |
| GCA.900066575                 | 0.18   | 0.05    | 0.13 | 0.09   | 0.29    | 0.62 | 0.03   | 0.74    | 0.94 | 0.02   | 0.81    | 0.96 | 0.01   | 0.87    | 0.98 |
| Gordonibacter                 | 0.10   | 0.27    | 0.47 | 0.05   | 0.53    | 0.80 | 0.03   | 0.70    | 0.94 | 0.02   | 0.78    | 0.96 | 0.02   | 0.80    | 0.96 |
| Granulicatella                | -0.04  | 0.72    | 0.80 | -0.03  | 0.81    | 0.89 | 0.00   | 0.98    | 0.99 | 0.00   | 0.99    | 0.99 | 0.02   | 0.89    | 0.96 |
| Haemophilus                   | 0.14   | 0.03    | 0.10 | 0.11   | 0.07    | 0.32 | 0.07   | 0.27    | 0.84 | 0.07   | 0.27    | 0.85 | 0.08   | 0.22    | 0.78 |
| Harryflintia                  | -0.01  | 0.90    | 0.94 | -0.04  | 0.67    | 0.88 | -0.05  | 0.59    | 0.94 | -0.06  | 0.55    | 0.96 | -0.07  | 0.49    | 0.96 |
| Holdemanella                  | -0.02  | 0.70    | 0.79 | 0.00   | 1.00    | 1.00 | 0.03   | 0.65    | 0.94 | 0.03   | 0.63    | 0.96 | 0.03   | 0.62    | 0.96 |
| Holdemanina                   | 0.09   | 0.59    | 0.73 | 0.09   | 0.54    | 0.80 | 0.08   | 0.62    | 0.94 | 0.07   | 0.66    | 0.96 | 0.04   | 0.80    | 0.96 |
| Hungatella                    | -0.22  | 0.01    | 0.05 | -0.18  | 0.01    | 0.14 | -0.13  | 0.10    | 0.72 | -0.13  | 0.09    | 0.69 | -0.12  | 0.13    | 0.74 |

|                               |       |      |      |       |      |      |       |      |      |       |      |      |       |      |      |
|-------------------------------|-------|------|------|-------|------|------|-------|------|------|-------|------|------|-------|------|------|
| Hydrogenoanaerobacterium      | 0.28  | 0.00 | 0.02 | 0.17  | 0.03 | 0.27 | 0.13  | 0.14 | 0.72 | 0.12  | 0.16 | 0.69 | 0.12  | 0.16 | 0.74 |
| Incertae_Sedis                | 0.12  | 0.37 | 0.56 | 0.14  | 0.25 | 0.59 | 0.15  | 0.24 | 0.78 | 0.15  | 0.25 | 0.80 | 0.16  | 0.23 | 0.78 |
| Intestinibacter               | 0.10  | 0.22 | 0.42 | 0.15  | 0.04 | 0.28 | 0.14  | 0.07 | 0.66 | 0.15  | 0.05 | 0.57 | 0.16  | 0.04 | 0.57 |
| Intestinimonas                | 0.20  | 0.01 | 0.04 | 0.12  | 0.08 | 0.33 | 0.09  | 0.21 | 0.73 | 0.08  | 0.24 | 0.80 | 0.10  | 0.19 | 0.76 |
| Lachnoclostridium             | -0.53 | 0.00 | 0.01 | -0.37 | 0.01 | 0.13 | -0.22 | 0.15 | 0.73 | -0.21 | 0.16 | 0.69 | -0.21 | 0.17 | 0.74 |
| Lachnospira                   | 0.33  | 0.00 | 0.00 | 0.21  | 0.00 | 0.07 | 0.13  | 0.08 | 0.72 | 0.14  | 0.07 | 0.64 | 0.15  | 0.05 | 0.57 |
| Lachnospiraceae_FCS020_group  | 0.35  | 0.00 | 0.00 | 0.24  | 0.00 | 0.04 | 0.21  | 0.01 | 0.28 | 0.21  | 0.01 | 0.28 | 0.21  | 0.01 | 0.32 |
| Lachnospiraceae_ND3007_group  | 0.11  | 0.04 | 0.13 | 0.05  | 0.31 | 0.62 | 0.03  | 0.63 | 0.94 | 0.03  | 0.59 | 0.96 | 0.03  | 0.57 | 0.96 |
| Lachnospiraceae_NK4A136_group | 0.11  | 0.14 | 0.30 | 0.01  | 0.88 | 0.91 | -0.11 | 0.17 | 0.73 | -0.11 | 0.17 | 0.69 | -0.10 | 0.19 | 0.76 |
| Lachnospiraceae_UCG.001       | 0.12  | 0.03 | 0.11 | 0.09  | 0.09 | 0.36 | 0.04  | 0.47 | 0.94 | 0.04  | 0.51 | 0.96 | 0.04  | 0.48 | 0.96 |
| Lachnospiraceae_UCG.004       | 0.09  | 0.14 | 0.30 | 0.06  | 0.34 | 0.66 | 0.03  | 0.59 | 0.94 | 0.04  | 0.56 | 0.96 | 0.02  | 0.71 | 0.96 |
| Lachnospiraceae_UCG.010       | -0.05 | 0.60 | 0.74 | -0.13 | 0.14 | 0.43 | -0.16 | 0.07 | 0.66 | -0.17 | 0.06 | 0.57 | -0.17 | 0.05 | 0.57 |
| Lactobacillus                 | -0.21 | 0.00 | 0.04 | -0.12 | 0.09 | 0.36 | -0.12 | 0.09 | 0.72 | -0.12 | 0.11 | 0.69 | -0.12 | 0.11 | 0.74 |
| Lactococcus                   | 0.12  | 0.23 | 0.43 | 0.08  | 0.39 | 0.70 | 0.09  | 0.37 | 0.94 | 0.08  | 0.39 | 0.96 | 0.07  | 0.47 | 0.96 |
| Marvinbryantia                | 0.03  | 0.57 | 0.73 | -0.01 | 0.83 | 0.89 | -0.01 | 0.87 | 0.96 | -0.01 | 0.85 | 0.96 | 0.00  | 0.96 | 0.98 |
| Megasphaera                   | -0.10 | 0.06 | 0.15 | -0.03 | 0.52 | 0.80 | 0.03  | 0.63 | 0.94 | 0.03  | 0.62 | 0.96 | 0.02  | 0.71 | 0.96 |
| Monoglobus                    | 0.28  | 0.00 | 0.01 | 0.23  | 0.00 | 0.04 | 0.18  | 0.02 | 0.56 | 0.18  | 0.02 | 0.57 | 0.18  | 0.02 | 0.51 |
| Moryella                      | 0.23  | 0.03 | 0.10 | 0.14  | 0.15 | 0.45 | 0.06  | 0.54 | 0.94 | 0.06  | 0.54 | 0.96 | 0.07  | 0.52 | 0.96 |
| Negativibacillus              | -0.06 | 0.33 | 0.52 | -0.05 | 0.41 | 0.71 | -0.05 | 0.46 | 0.94 | -0.05 | 0.45 | 0.96 | -0.05 | 0.39 | 0.96 |
| NK4A214_group                 | 0.10  | 0.05 | 0.14 | 0.05  | 0.25 | 0.59 | 0.01  | 0.81 | 0.95 | 0.01  | 0.87 | 0.97 | 0.01  | 0.80 | 0.96 |
| Odoribacter                   | 0.11  | 0.02 | 0.10 | 0.08  | 0.06 | 0.32 | 0.05  | 0.35 | 0.93 | 0.04  | 0.36 | 0.96 | 0.04  | 0.39 | 0.96 |
| Oscillibacter                 | 0.19  | 0.02 | 0.10 | 0.15  | 0.06 | 0.32 | 0.13  | 0.13 | 0.72 | 0.12  | 0.15 | 0.69 | 0.12  | 0.16 | 0.74 |
| Oscillospira                  | 0.08  | 0.51 | 0.69 | 0.09  | 0.42 | 0.73 | 0.11  | 0.34 | 0.93 | 0.10  | 0.36 | 0.96 | 0.13  | 0.28 | 0.84 |
| Oxalobacter                   | 0.23  | 0.01 | 0.04 | 0.11  | 0.16 | 0.46 | 0.06  | 0.50 | 0.94 | 0.05  | 0.52 | 0.96 | 0.05  | 0.52 | 0.96 |
| Paludicola                    | 0.20  | 0.02 | 0.09 | 0.10  | 0.20 | 0.50 | 0.03  | 0.69 | 0.94 | 0.02  | 0.80 | 0.96 | 0.03  | 0.69 | 0.96 |
| Parabacteroides               | 0.03  | 0.66 | 0.77 | 0.07  | 0.19 | 0.49 | 0.08  | 0.17 | 0.73 | 0.08  | 0.16 | 0.69 | 0.09  | 0.15 | 0.74 |
| Paraprevotella                | -0.04 | 0.37 | 0.56 | -0.02 | 0.70 | 0.89 | -0.03 | 0.52 | 0.94 | -0.03 | 0.49 | 0.96 | -0.03 | 0.52 | 0.96 |
| Parasutterella                | 0.15  | 0.00 | 0.01 | 0.14  | 0.00 | 0.04 | 0.09  | 0.05 | 0.63 | 0.09  | 0.05 | 0.57 | 0.08  | 0.07 | 0.63 |
| Peptococcus                   | 0.13  | 0.17 | 0.34 | 0.04  | 0.60 | 0.83 | -0.02 | 0.79 | 0.95 | -0.03 | 0.75 | 0.96 | -0.02 | 0.79 | 0.96 |
| Phascolarctobacterium         | 0.08  | 0.08 | 0.19 | 0.09  | 0.03 | 0.27 | 0.09  | 0.04 | 0.62 | 0.08  | 0.05 | 0.57 | 0.08  | 0.05 | 0.57 |
| Phocea                        | -0.15 | 0.18 | 0.35 | -0.19 | 0.07 | 0.32 | -0.21 | 0.05 | 0.63 | -0.20 | 0.06 | 0.57 | -0.20 | 0.06 | 0.62 |
| Prevotella                    | -0.09 | 0.03 | 0.11 | -0.05 | 0.19 | 0.49 | -0.05 | 0.21 | 0.73 | -0.05 | 0.21 | 0.76 | -0.05 | 0.24 | 0.78 |
| Romboutsia                    | 0.02  | 0.73 | 0.81 | 0.06  | 0.39 | 0.70 | 0.04  | 0.55 | 0.94 | 0.05  | 0.52 | 0.96 | 0.05  | 0.50 | 0.96 |
| Roseburia                     | 0.12  | 0.17 | 0.34 | 0.08  | 0.28 | 0.62 | 0.02  | 0.81 | 0.95 | 0.02  | 0.78 | 0.96 | 0.04  | 0.66 | 0.96 |
| Ruminococcus                  | 0.14  | 0.01 | 0.05 | 0.08  | 0.10 | 0.37 | 0.04  | 0.42 | 0.94 | 0.04  | 0.44 | 0.96 | 0.04  | 0.41 | 0.96 |
| Sellimonas                    | 0.17  | 0.03 | 0.10 | 0.13  | 0.07 | 0.32 | 0.12  | 0.11 | 0.72 | 0.11  | 0.12 | 0.69 | 0.12  | 0.11 | 0.74 |
| Senegalimassilia              | 0.01  | 0.90 | 0.94 | 0.01  | 0.84 | 0.89 | 0.00  | 0.96 | 0.99 | 0.00  | 0.97 | 0.99 | 0.01  | 0.93 | 0.98 |
| Shuttleworthia                | 0.19  | 0.02 | 0.08 | 0.07  | 0.35 | 0.67 | 0.02  | 0.79 | 0.95 | 0.02  | 0.83 | 0.96 | 0.03  | 0.75 | 0.96 |
| Slackia                       | -0.07 | 0.30 | 0.49 | -0.04 | 0.46 | 0.75 | -0.05 | 0.41 | 0.94 | -0.05 | 0.42 | 0.96 | -0.06 | 0.34 | 0.96 |
| Streptococcus                 | 0.08  | 0.37 | 0.56 | 0.08  | 0.37 | 0.69 | 0.12  | 0.20 | 0.73 | 0.12  | 0.21 | 0.76 | 0.12  | 0.19 | 0.76 |
| Subdoligranulum               | 0.23  | 0.00 | 0.01 | 0.18  | 0.00 | 0.08 | 0.14  | 0.04 | 0.62 | 0.14  | 0.04 | 0.57 | 0.14  | 0.03 | 0.57 |
| Sutterella                    | -0.12 | 0.00 | 0.03 | -0.07 | 0.05 | 0.32 | -0.06 | 0.11 | 0.72 | -0.06 | 0.11 | 0.69 | -0.06 | 0.11 | 0.74 |
| TM7x                          | -0.02 | 0.81 | 0.88 | -0.09 | 0.30 | 0.62 | -0.06 | 0.51 | 0.94 | -0.06 | 0.51 | 0.96 | -0.05 | 0.61 | 0.96 |
| Turicibacter                  | 0.17  | 0.07 | 0.18 | 0.24  | 0.01 | 0.11 | 0.28  | 0.00 | 0.18 | 0.28  | 0.00 | 0.17 | 0.27  | 0.01 | 0.28 |
| Tuzzerella                    | -0.07 | 0.29 | 0.48 | -0.05 | 0.46 | 0.75 | -0.06 | 0.35 | 0.93 | -0.06 | 0.34 | 0.96 | -0.07 | 0.28 | 0.84 |
| UBA1819                       | 0.04  | 0.70 | 0.79 | 0.02  | 0.83 | 0.89 | 0.04  | 0.66 | 0.94 | 0.03  | 0.74 | 0.96 | 0.04  | 0.71 | 0.96 |
| UCG.002                       | 0.11  | 0.03 | 0.10 | 0.05  | 0.23 | 0.56 | 0.01  | 0.87 | 0.96 | 0.00  | 0.93 | 0.99 | 0.01  | 0.91 | 0.98 |
| UCG.003                       | 0.12  | 0.03 | 0.11 | 0.05  | 0.29 | 0.62 | 0.01  | 0.82 | 0.95 | 0.01  | 0.82 | 0.96 | 0.00  | 0.93 | 0.98 |
| UCG.005                       | 0.17  | 0.01 | 0.04 | 0.12  | 0.04 | 0.29 | 0.06  | 0.35 | 0.93 | 0.05  | 0.40 | 0.96 | 0.06  | 0.38 | 0.96 |
| UCG.009                       | 0.13  | 0.18 | 0.35 | 0.02  | 0.83 | 0.89 | -0.05 | 0.61 | 0.94 | -0.05 | 0.59 | 0.96 | -0.05 | 0.62 | 0.96 |
| Veillonella                   | 0.07  | 0.32 | 0.51 | 0.06  | 0.31 | 0.62 | 0.04  | 0.51 | 0.94 | 0.05  | 0.48 | 0.96 | 0.05  | 0.45 | 0.96 |
| Victivallis                   | 0.14  | 0.04 | 0.12 | 0.09  | 0.17 | 0.47 | 0.03  | 0.70 | 0.94 | 0.02  | 0.74 | 0.96 | 0.03  | 0.68 | 0.96 |

Multivariable-adjusted regression models adjusted for:

Model 1: sequencing batch, age, race, gender, study center

Model 2: Model 1, with education

Model 3: Model 2, with physical activity, diet score, medication use, and smoking

Model 4: Model 3 with BMI

Model 5: Model 4 with hypertension and diabetes

eTable 19: Multivariable-adjusted regression coefficients, p-values, race interaction p-values, false discovery rate (FDR)-adjusted p-values for race-genera interactions with respect to DSST.

|                               | Model1 |         |           |      |         | Model2 |         |           |      |         | Model3 |         |           |      |         | Model4 |         |           |      |         | Model5 |         |           |      |         |
|-------------------------------|--------|---------|-----------|------|---------|--------|---------|-----------|------|---------|--------|---------|-----------|------|---------|--------|---------|-----------|------|---------|--------|---------|-----------|------|---------|
|                               | beta   | p-value | p-val int | FDR  | FDR-int | beta   | p-value | p-val int | FDR  | FDR-int | beta   | p-value | p-val int | FDR  | FDR-int | beta   | p-value | p-val int | FDR  | FDR-int | beta   | p-value | p-val int | FDR  | FDR-int |
| Acetanaerobacterium           | 0.67   | 0.73    | 0.49      | 0.86 | 0.74    | 0.67   | 0.72    | 0.80      | 0.85 | 0.93    | 0.37   | 0.85    | 1.00      | 0.95 | 1.00    | 0.37   | 0.85    | 1.00      | 0.94 | 1.00    | 0.22   | 0.91    | 0.96      | 0.95 | 0.97    |
| Acidaminococcus               | -0.29  | 0.62    | 0.41      | 0.79 | 0.69    | 0.03   | 0.96    | 0.60      | 0.97 | 0.83    | 0.48   | 0.42    | 0.37      | 0.84 | 0.80    | 0.48   | 0.42    | 0.37      | 0.84 | 0.80    | 0.49   | 0.42    | 0.36      | 0.80 | 0.73    |
| Actinomyces                   | -2.24  | 0.14    | 0.07      | 0.31 | 0.33    | -1.74  | 0.23    | 0.08      | 0.51 | 0.44    | -1.03  | 0.51    | 0.08      | 0.84 | 0.59    | -1.03  | 0.51    | 0.08      | 0.84 | 0.59    | -0.93  | 0.55    | 0.07      | 0.80 | 0.62    |
| Adherentzia                   | 2.55   | 0.01    | 0.10      | 0.06 | 0.35    | 2.10   | 0.03    | 0.19      | 0.18 | 0.58    | 2.25   | 0.03    | 0.14      | 0.23 | 0.59    | 2.25   | 0.03    | 0.14      | 0.23 | 0.59    | 2.20   | 0.04    | 0.15      | 0.27 | 0.63    |
| Agathobacter                  | 0.12   | 0.93    | 0.78      | 0.97 | 0.90    | -0.10  | 0.94    | 0.70      | 0.96 | 0.87    | -0.84  | 0.52    | 0.62      | 0.84 | 0.88    | -0.84  | 0.52    | 0.62      | 0.84 | 0.88    | -0.77  | 0.56    | 0.63      | 0.80 | 0.87    |
| Akkermansia                   | 2.42   | 0.00    | 0.08      | 0.01 | 0.35    | 1.92   | 0.00    | 0.16      | 0.04 | 0.56    | 1.85   | 0.01    | 0.24      | 0.14 | 0.65    | 1.85   | 0.01    | 0.24      | 0.14 | 0.65    | 1.93   | 0.01    | 0.22      | 0.13 | 0.63    |
| Alistipes                     | 1.73   | 0.14    | 0.36      | 0.31 | 0.67    | 1.16   | 0.29    | 0.51      | 0.55 | 0.83    | 0.70   | 0.54    | 0.64      | 0.84 | 0.89    | 0.70   | 0.54    | 0.64      | 0.84 | 0.89    | 0.67   | 0.55    | 0.61      | 0.80 | 0.87    |
| Allisonella                   | -3.15  | 0.00    | 0.06      | 0.03 | 0.31    | -1.79  | 0.09    | 0.10      | 0.31 | 0.44    | -1.10  | 0.34    | 0.30      | 0.77 | 0.70    | -1.11  | 0.34    | 0.29      | 0.77 | 0.70    | -1.04  | 0.38    | 0.31      | 0.80 | 0.73    |
| Anaerofilum                   | 4.03   | 0.01    | 0.09      | 0.04 | 0.35    | 2.83   | 0.05    | 0.10      | 0.22 | 0.44    | 3.04   | 0.05    | 0.09      | 0.33 | 0.59    | 3.04   | 0.05    | 0.09      | 0.33 | 0.59    | 3.17   | 0.04    | 0.09      | 0.30 | 0.62    |
| Anaerostipes                  | 1.07   | 0.43    | 0.53      | 0.64 | 0.78    | 0.52   | 0.69    | 0.59      | 0.84 | 0.83    | 1.11   | 0.41    | 0.22      | 0.84 | 0.64    | 1.12   | 0.41    | 0.22      | 0.84 | 0.64    | 1.22   | 0.39    | 0.22      | 0.80 | 0.63    |
| Anaerotruncus                 | 4.17   | 0.00    | 0.00      | 0.01 | 0.07    | 3.78   | 0.00    | 0.00      | 0.03 | 0.07    | 3.16   | 0.01    | 0.01      | 0.14 | 0.18    | 3.16   | 0.01    | 0.01      | 0.14 | 0.18    | 3.17   | 0.01    | 0.01      | 0.13 | 0.18    |
| Bacteroides                   | -0.82  | 0.67    | 0.39      | 0.83 | 0.69    | -1.34  | 0.46    | 0.42      | 0.72 | 0.77    | -0.80  | 0.66    | 0.49      | 0.87 | 0.87    | -0.80  | 0.66    | 0.49      | 0.86 | 0.87    | -0.92  | 0.62    | 0.49      | 0.81 | 0.83    |
| Barnesiella                   | 1.94   | 0.00    | 0.26      | 0.02 | 0.56    | 2.04   | 0.00    | 0.16      | 0.03 | 0.56    | 1.66   | 0.01    | 0.29      | 0.14 | 0.70    | 1.66   | 0.01    | 0.29      | 0.14 | 0.70    | 1.76   | 0.01    | 0.27      | 0.13 | 0.71    |
| Bifidobacterium               | 0.20   | 0.82    | 0.77      | 0.90 | 0.90    | 0.57   | 0.49    | 0.94      | 0.76 | 0.98    | 0.50   | 0.56    | 0.78      | 0.84 | 0.96    | 0.51   | 0.55    | 0.77      | 0.84 | 0.96    | 0.56   | 0.52    | 0.77      | 0.80 | 0.95    |
| Biflophia                     | 0.41   | 0.63    | 0.68      | 0.81 | 0.84    | -0.22  | 0.78    | 0.86      | 0.87 | 0.97    | -0.84  | 0.33    | 0.48      | 0.77 | 0.87    | -0.84  | 0.33    | 0.48      | 0.77 | 0.87    | -0.85  | 0.33    | 0.51      | 0.77 | 0.86    |
| Blautia                       | 5.85   | 0.03    | 0.49      | 0.12 | 0.74    | 5.24   | 0.04    | 0.41      | 0.21 | 0.76    | 6.78   | 0.01    | 0.22      | 0.14 | 0.64    | 6.79   | 0.01    | 0.22      | 0.14 | 0.64    | 7.81   | 0.01    | 0.17      | 0.13 | 0.63    |
| Butyrivococcus                | 5.07   | 0.01    | 0.10      | 0.04 | 0.35    | 3.40   | 0.06    | 0.15      | 0.24 | 0.56    | 2.96   | 0.11    | 0.22      | 0.58 | 0.64    | 2.98   | 0.11    | 0.22      | 0.58 | 0.64    | 3.09   | 0.10    | 0.22      | 0.51 | 0.63    |
| Butyricimonas                 | -0.13  | 0.85    | 0.29      | 0.92 | 0.59    | -0.38  | 0.58    | 0.26      | 0.78 | 0.61    | -0.20  | 0.78    | 0.50      | 0.90 | 0.87    | -0.20  | 0.78    | 0.49      | 0.90 | 0.87    | -0.21  | 0.77    | 0.52      | 0.90 | 0.86    |
| CAG_56                        | -0.88  | 0.29    | 0.01      | 0.51 | 0.17    | -0.95  | 0.23    | 0.02      | 0.51 | 0.23    | -1.88  | 0.03    | 0.00      | 0.21 | 0.11    | -1.88  | 0.02    | 0.00      | 0.21 | 0.11    | -1.83  | 0.03    | 0.01      | 0.26 | 0.12    |
| Candidatus_Soleaferrea        | 5.94   | 0.00    | 0.00      | 0.01 | 0.03    | 5.65   | 0.00    | 0.00      | 0.03 | 0.01    | 5.25   | 0.00    | 0.00      | 0.11 | 0.07    | 5.25   | 0.00    | 0.00      | 0.11 | 0.07    | 5.27   | 0.00    | 0.00      | 0.12 | 0.06    |
| Caproiciproducens             | 2.13   | 0.14    | 0.16      | 0.31 | 0.45    | 1.85   | 0.18    | 0.24      | 0.48 | 0.59    | 1.10   | 0.46    | 0.34      | 0.84 | 0.77    | 1.10   | 0.46    | 0.34      | 0.84 | 0.77    | 1.15   | 0.45    | 0.32      | 0.80 | 0.73    |
| Christensenellaceae_R.7_group | 2.31   | 0.00    | 0.17      | 0.02 | 0.45    | 1.69   | 0.01    | 0.32      | 0.09 | 0.64    | 1.00   | 0.17    | 0.69      | 0.60 | 0.94    | 1.02   | 0.17    | 0.68      | 0.61 | 0.94    | 1.16   | 0.12    | 0.60      | 0.53 | 0.87    |
| Clostridium_sensu_stricto_1   | 0.57   | 0.56    | 0.62      | 0.74 | 0.84    | 0.87   | 0.35    | 0.46      | 0.60 | 0.80    | 0.14   | 0.89    | 0.86      | 0.95 | 0.99    | 0.14   | 0.89    | 0.86      | 0.95 | 0.99    | 0.21   | 0.84    | 0.80      | 0.91 | 0.96    |
| Colidextribacter              | -0.72  | 0.65    | 0.34      | 0.82 | 0.65    | -0.85  | 0.58    | 0.17      | 0.78 | 0.56    | 0.28   | 0.86    | 0.08      | 0.95 | 0.59    | 0.28   | 0.86    | 0.08      | 0.94 | 0.59    | 0.45   | 0.78    | 0.08      | 0.90 | 0.62    |
| Collinsella                   | -1.97  | 0.01    | 0.09      | 0.04 | 0.35    | -1.24  | 0.09    | 0.12      | 0.31 | 0.48    | -1.11  | 0.15    | 0.17      | 0.60 | 0.62    | -1.11  | 0.15    | 0.17      | 0.60 | 0.62    | -1.04  | 0.18    | 0.20      | 0.63 | 0.63    |
| Coprobacter                   | 0.33   | 0.73    | 0.69      | 0.86 | 0.84    | 0.06   | 0.94    | 0.63      | 0.96 | 0.83    | -0.65  | 0.50    | 0.97      | 0.84 | 0.99    | -0.66  | 0.49    | 0.97      | 0.84 | 1.00    | -0.67  | 0.49    | 0.95      | 0.80 | 0.97    |
| Coprococcus                   | 0.28   | 0.76    | 0.13      | 0.88 | 0.43    | 0.55   | 0.53    | 0.29      | 0.76 | 0.63    | 0.60   | 0.51    | 0.46      | 0.84 | 0.87    | 0.60   | 0.51    | 0.46      | 0.84 | 0.87    | 0.65   | 0.49    | 0.46      | 0.80 | 0.83    |
| Defluviitaleaceae_UCG.011     | 4.83   | 0.00    | 0.03      | 0.01 | 0.27    | 4.35   | 0.00    | 0.03      | 0.03 | 0.31    | 3.45   | 0.02    | 0.10      | 0.14 | 0.59    | 3.47   | 0.01    | 0.10      | 0.14 | 0.59    | 3.54   | 0.01    | 0.08      | 0.13 | 0.62    |
| Desulfovibrio                 | 0.23   | 0.76    | 0.87      | 0.88 | 0.97    | 0.31   | 0.65    | 0.89      | 0.81 | 0.98    | 0.41   | 0.58    | 0.97      | 0.84 | 0.99    | 0.41   | 0.58    | 0.97      | 0.84 | 1.00    | 0.44   | 0.57    | 0.96      | 0.80 | 0.97    |
| Dialister                     | -0.03  | 0.96    | 0.79      | 0.98 | 0.90    | 0.09   | 0.87    | 0.95      | 0.93 | 0.98    | 0.60   | 0.33    | 0.51      | 0.77 | 0.87    | 0.60   | 0.33    | 0.51      | 0.77 | 0.87    | 0.59   | 0.35    | 0.56      | 0.78 | 0.87    |
| DNF00809                      | 2.27   | 0.15    | 0.65      | 0.31 | 0.84    | 2.18   | 0.15    | 0.52      | 0.42 | 0.83    | 1.96   | 0.21    | 0.60      | 0.64 | 0.88    | 1.96   | 0.21    | 0.60      | 0.64 | 0.88    | 2.00   | 0.20    | 0.58      | 0.64 | 0.87    |
| Dorea                         | -0.07  | 0.95    | 0.93      | 0.98 | 0.98    | -0.03  | 0.98    | 0.77      | 0.98 | 0.91    | 0.38   | 0.72    | 0.88      | 0.87 | 0.99    | 0.38   | 0.72    | 0.88      | 0.86 | 0.99    | 0.38   | 0.72    | 0.85      | 0.87 | 0.96    |
| DTU089                        | 3.67   | 0.00    | 0.00      | 0.02 | 0.06    | 3.10   | 0.01    | 0.00      | 0.07 | 0.07    | 2.92   | 0.02    | 0.00      | 0.14 | 0.11    | 2.92   | 0.02    | 0.00      | 0.14 | 0.11    | 2.95   | 0.02    | 0.00      | 0.14 | 0.12    |
| Eggerthella                   | 1.13   | 0.32    | 0.30      | 0.53 | 0.60    | 0.68   | 0.53    | 0.46      | 0.76 | 0.80    | 1.51   | 0.19    | 0.28      | 0.60 | 0.70    | 1.52   | 0.19    | 0.27      | 0.61 | 0.70    | 1.48   | 0.21    | 0.34      | 0.64 | 0.73    |
| Eisenbergiella                | 0.28   | 0.80    | 0.75      | 0.89 | 0.90    | 0.24   | 0.82    | 0.81      | 0.89 | 0.93    | 1.29   | 0.25    | 0.23      | 0.66 | 0.64    | 1.29   | 0.25    | 0.23      | 0.66 | 0.64    | 1.25   | 0.27    | 0.31      | 0.71 | 0.73    |
| Erysipelatoclostridium        | 0.46   | 0.70    | 0.42      | 0.86 | 0.69    | 0.30   | 0.79    | 0.58      | 0.87 | 0.83    | 1.37   | 0.25    | 0.30      | 0.66 | 0.70    | 1.37   | 0.25    | 0.30      | 0.66 | 0.70    | 1.32   | 0.27    | 0.35      | 0.71 | 0.73    |
| Erysipelotrichaceae_UCG.003   | 1.19   | 0.19    | 0.39      | 0.36 | 0.69    | 1.16   | 0.17    | 0.30      | 0.47 | 0.63    | 0.39   | 0.66    | 0.56      | 0.87 | 0.88    | 0.39   | 0.66    | 0.57      | 0.86 | 0.88    | 0.51   | 0.58    | 0.49      | 0.80 | 0.83    |
| Escherichia_Shigella          | -0.02  | 0.98    | 0.94      | 1.00 | 0.98    | 0.68   | 0.38    | 0.63      | 0.64 | 0.83    | 1.19   | 0.15    | 0.30      | 0.60 | 0.70    | 1.19   | 0.15    | 0.30      | 0.60 | 0.70    | 1.13   | 0.18    | 0.33      | 0.63 | 0.73    |
| Faecalibacterium              | 1.92   | 0.20    | 0.91      | 0.37 | 0.97    | 0.88   | 0.53    | 0.67      | 0.76 | 0.86    | 0.24   | 0.87    | 0.57      | 0.95 | 0.88    | 0.24   | 0.87    | 0.57      | 0.95 | 0.88    | 0.39   | 0.79    | 0.62      | 0.90 | 0.87    |
| Family_XIII_AD3011_group      | 3.47   | 0.00    | 0.16      | 0.02 | 0.45    | 2.64   | 0.02    | 0.22      | 0.10 | 0.58    | 1.95   | 0.10    | 0.39      | 0.58 | 0.81    | 1.97   | 0.10    | 0.39      | 0.58 | 0.80    | 2.10   | 0.08    | 0.36      | 0.48 | 0.73    |
| Family_XIII_UCG.001           | 3.06   | 0.03    | 0.16      | 0.11 | 0.45    | 2.70   | 0.04    | 0.12      | 0.21 | 0.48    | 1.04   | 0.46    | 0.60      | 0.84 | 0.88    | 1.05   | 0.46    | 0.60      | 0.84 | 0.88    | 1.11   | 0.44    | 0.58      | 0.80 | 0.87    |
| FD2005                        | -0.48  | 0.70    | 0.35      | 0.86 | 0.66    | 0.56   | 0.65    | 0.90      | 0.81 | 0.98    | 0.51   | 0.69    | 0.83      | 0.87 | 0.97    | 0.51   | 0.69    | 0.83      | 0.86 | 0.97    | 0.61   | 0.64    | 0.92      | 0.82 | 0.97    |
| Flavonifractor                | -0.14  | 0.90    | 0.30      | 0.95 | 0.60    | -0.31  | 0.77    | 0.44      | 0.87 | 0.79    | 0.85   | 0.45    | 0.19      | 0.84 | 0.64    | 0.86   | 0.45    | 0.19      | 0.84 | 0.64    | 0.84   | 0.47    | 0.22      | 0.80 | 0.63    |
| Fournierella                  | 2.03   | 0.13    | 0.42      | 0.31 | 0.69    | 1.65   | 0.20    | 0.56      | 0.50 | 0.83    | 0.64   | 0.63    | 0.70      | 0.87 | 0.94    | 0.64   | 0.64    | 0.70      | 0.86 | 0.94    | 0.91   | 0.51    | 0.62      | 0.80 | 0.87    |
| Frisingicoccus                | 0.77   | 0.44    | 0.03      | 0.64 | 0.27    | 0.37   | 0.70    | 0.05      | 0.84 | 0.36    | 0.57   | 0.58    | 0.04      | 0.84 | 0.42    | 0.56   | 0.58    | 0.04      | 0.84 | 0.42    | 0.58   | 0.58    | 0.05      | 0.80 | 0.49    |
| Fusificatenibacter            | 0.62   | 0.50    | 0.61      | 0.67 | 0.84    | 0.34   | 0.70    | 0.55      | 0.84 | 0.83    | 0.10   | 0.91    | 0.62      | 0.95 | 0.88    | 0.10   | 0.91    | 0.62      | 0.95 | 0.88    | 0.24   | 0.80    | 0.55      | 0.91 | 0.87    |
| Fusobacterium                 | -2.09  | 0.05    | 0.02      | 0.16 | 0.17    | -1.52  | 0.14    | 0.02      | 0.42 | 0.23    | -0.45  | 0.68    | 0.11      | 0.87 | 0.59    | -0.45  | 0.68    | 0.11      | 0.86 | 0.59    | -0.59  | 0.60    | 0.10      | 0.80 | 0.62    |
| GCA_900066575                 | 1.34   | 0.30    | 0.64      | 0.51 | 0.84    | 0.63   | 0.61    | 0.64      | 0.80 | 0.83    | -0.48  | 0.71    | 0.89      | 0.87 | 0.99    | -0.49  | 0.71    | 0.89      | 0.86 | 0.99    | -0.40  | 0.76    | 0.78      | 0.90 | 0.95    |
| Gordonibacter                 | 3.29   | 0.02    | 0.00      | 0.07 | 0.08    | 2.23   | 0.09    | 0.02      | 0.31 | 0.23    | 1.83   | 0.18    | 0.04      | 0.60 | 0.42    | 1.82   | 0.19    | 0.04      | 0.61 | 0.42    | 1.81   | 0.20    | 0.04      | 0.63 | 0.44    |
| Granulicatella                | -2.17  | 0.15    | 0.12      | 0.31 | 0.42    | -1.68  | 0.25    | 0.22      | 0.53 | 0.58    | -1.79  | 0.24    | 0.17      | 0.66 | 0.62    | -1.80  | 0.24    | 0.17      | 0.66 | 0.62    | -1.77  | 0.25    | 0.15      | 0.71 | 0.63    |

|                       |       |      |      |      |      |       |      |      |      |      |       |      |      |      |      |       |      |      |      |      |       |      |      |      |      |
|-----------------------|-------|------|------|------|------|-------|------|------|------|------|-------|------|------|------|------|-------|------|------|------|------|-------|------|------|------|------|
| Monoglobus            | 3.19  | 0.00 | 0.15 | 0.02 | 0.45 | 2.60  | 0.01 | 0.24 | 0.07 | 0.59 | 1.40  | 0.18 | 0.79 | 0.60 | 0.96 | 1.40  | 0.18 | 0.79 | 0.61 | 0.96 | 1.58  | 0.14 | 0.72 | 0.56 | 0.93 |
| Moryella              | 1.69  | 0.28 | 0.56 | 0.50 | 0.79 | 0.98  | 0.51 | 0.54 | 0.76 | 0.83 | -0.31 | 0.85 | 0.38 | 0.95 | 0.81 | -0.32 | 0.85 | 0.38 | 0.94 | 0.80 | -0.25 | 0.88 | 0.39 | 0.93 | 0.77 |
| Negativibacillus      | 0.99  | 0.28 | 0.02 | 0.51 | 0.17 | 1.31  | 0.14 | 0.00 | 0.42 | 0.07 | 1.37  | 0.14 | 0.01 | 0.60 | 0.11 | 1.37  | 0.14 | 0.01 | 0.60 | 0.11 | 1.48  | 0.12 | 0.00 | 0.53 | 0.12 |
| NK4A214_group         | 0.78  | 0.30 | 0.97 | 0.51 | 0.99 | 0.43  | 0.55 | 0.96 | 0.78 | 0.98 | -0.26 | 0.73 | 0.59 | 0.87 | 0.88 | -0.27 | 0.72 | 0.58 | 0.86 | 0.88 | -0.17 | 0.83 | 0.61 | 0.91 | 0.87 |
| Odoribacter           | 0.94  | 0.17 | 0.20 | 0.34 | 0.49 | 0.42  | 0.52 | 0.51 | 0.76 | 0.83 | 0.23  | 0.74 | 0.39 | 0.87 | 0.81 | 0.23  | 0.74 | 0.39 | 0.87 | 0.80 | 0.29  | 0.68 | 0.32 | 0.85 | 0.73 |
| Oscillibacter         | 3.63  | 0.00 | 0.06 | 0.02 | 0.31 | 3.48  | 0.00 | 0.03 | 0.04 | 0.25 | 3.43  | 0.01 | 0.03 | 0.14 | 0.39 | 3.45  | 0.01 | 0.03 | 0.14 | 0.39 | 3.62  | 0.00 | 0.03 | 0.13 | 0.32 |
| Oscillospira          | 2.40  | 0.13 | 0.04 | 0.31 | 0.29 | 2.13  | 0.16 | 0.07 | 0.44 | 0.44 | 2.47  | 0.11 | 0.14 | 0.58 | 0.59 | 2.48  | 0.11 | 0.13 | 0.58 | 0.59 | 2.76  | 0.09 | 0.11 | 0.48 | 0.62 |
| Oxalobacter           | 2.20  | 0.08 | 0.90 | 0.22 | 0.97 | 1.38  | 0.25 | 0.99 | 0.53 | 0.99 | 0.82  | 0.52 | 0.76 | 0.84 | 0.96 | 0.82  | 0.53 | 0.76 | 0.84 | 0.96 | 0.68  | 0.60 | 0.66 | 0.80 | 0.90 |
| Paludicola            | 4.65  | 0.00 | 0.01 | 0.01 | 0.17 | 4.09  | 0.00 | 0.00 | 0.03 | 0.07 | 3.33  | 0.01 | 0.01 | 0.14 | 0.16 | 3.34  | 0.01 | 0.01 | 0.14 | 0.16 | 3.41  | 0.01 | 0.01 | 0.13 | 0.19 |
| Parabacteroides       | 0.13  | 0.89 | 0.41 | 0.95 | 0.69 | 0.12  | 0.89 | 0.76 | 0.93 | 0.91 | 0.13  | 0.89 | 0.92 | 0.95 | 0.99 | 0.13  | 0.89 | 0.92 | 0.95 | 0.99 | 0.17  | 0.85 | 0.88 | 0.91 | 0.97 |
| Paraprevotella        | -0.75 | 0.25 | 0.79 | 0.46 | 0.90 | -0.65 | 0.30 | 0.63 | 0.55 | 0.83 | -0.51 | 0.45 | 0.76 | 0.84 | 0.96 | -0.51 | 0.44 | 0.76 | 0.84 | 0.96 | -0.44 | 0.51 | 0.81 | 0.80 | 0.96 |
| Parasutterella        | 1.36  | 0.05 | 0.26 | 0.15 | 0.56 | 1.11  | 0.09 | 0.34 | 0.31 | 0.65 | 0.75  | 0.28 | 0.47 | 0.70 | 0.87 | 0.75  | 0.28 | 0.47 | 0.70 | 0.87 | 0.78  | 0.27 | 0.40 | 0.71 | 0.77 |
| Peptococcus           | 2.28  | 0.10 | 0.45 | 0.27 | 0.72 | 1.41  | 0.29 | 0.58 | 0.55 | 0.83 | 0.95  | 0.50 | 0.75 | 0.84 | 0.96 | 0.95  | 0.50 | 0.75 | 0.84 | 0.96 | 1.00  | 0.48 | 0.79 | 0.80 | 0.96 |
| Phascolarctobacterium | 0.58  | 0.35 | 0.21 | 0.56 | 0.50 | 0.56  | 0.35 | 0.27 | 0.60 | 0.62 | 0.53  | 0.40 | 0.29 | 0.84 | 0.70 | 0.53  | 0.41 | 0.29 | 0.84 | 0.70 | 0.52  | 0.42 | 0.27 | 0.80 | 0.71 |
| Phocaea               | 0.03  | 0.99 | 0.77 | 1.00 | 0.90 | -0.49 | 0.74 | 0.61 | 0.86 | 0.83 | 0.36  | 0.81 | 0.98 | 0.92 | 0.99 | 0.37  | 0.81 | 0.98 | 0.92 | 1.00 | 0.42  | 0.78 | 0.95 | 0.90 | 0.97 |
| Prevotella            | -0.83 | 0.13 | 0.98 | 0.31 | 0.99 | -0.66 | 0.21 | 0.70 | 0.50 | 0.87 | -0.63 | 0.25 | 0.81 | 0.67 | 0.97 | -0.63 | 0.25 | 0.81 | 0.66 | 0.96 | -0.59 | 0.29 | 0.85 | 0.73 | 0.96 |
| Romboutsia            | 0.23  | 0.83 | 0.89 | 0.90 | 0.97 | 0.54  | 0.59 | 0.83 | 0.79 | 0.95 | 0.78  | 0.47 | 0.49 | 0.84 | 0.87 | 0.79  | 0.47 | 0.48 | 0.84 | 0.87 | 1.05  | 0.35 | 0.38 | 0.78 | 0.77 |
| Roseburia             | 2.03  | 0.07 | 0.60 | 0.20 | 0.84 | 1.83  | 0.09 | 0.54 | 0.31 | 0.83 | 0.62  | 0.59 | 0.90 | 0.84 | 0.99 | 0.62  | 0.59 | 0.90 | 0.84 | 0.99 | 0.70  | 0.55 | 0.94 | 0.80 | 0.97 |
| Ruminococcus          | 2.31  | 0.00 | 0.07 | 0.02 | 0.35 | 1.77  | 0.01 | 0.09 | 0.09 | 0.44 | 1.16  | 0.13 | 0.21 | 0.60 | 0.64 | 1.16  | 0.13 | 0.21 | 0.60 | 0.64 | 1.28  | 0.10 | 0.20 | 0.51 | 0.63 |
| Selimonas             | 0.78  | 0.48 | 0.85 | 0.67 | 0.96 | 0.60  | 0.57 | 0.97 | 0.78 | 0.98 | 0.51  | 0.64 | 0.99 | 0.87 | 0.99 | 0.51  | 0.65 | 0.99 | 0.86 | 1.00 | 0.52  | 0.64 | 0.98 | 0.82 | 0.98 |
| Senegalimassilia      | -0.74 | 0.44 | 0.09 | 0.64 | 0.35 | -0.45 | 0.62 | 0.18 | 0.80 | 0.58 | -1.07 | 0.26 | 0.17 | 0.67 | 0.62 | -1.08 | 0.26 | 0.17 | 0.67 | 0.62 | -1.00 | 0.30 | 0.19 | 0.73 | 0.63 |
| Shuttleworthia        | 4.47  | 0.00 | 0.00 | 0.01 | 0.06 | 3.25  | 0.01 | 0.00 | 0.08 | 0.07 | 3.28  | 0.01 | 0.00 | 0.14 | 0.11 | 3.28  | 0.01 | 0.00 | 0.14 | 0.11 | 3.31  | 0.01 | 0.00 | 0.13 | 0.12 |
| Slackia               | -0.63 | 0.47 | 0.88 | 0.67 | 0.97 | -0.62 | 0.45 | 0.89 | 0.72 | 0.98 | -0.66 | 0.45 | 0.92 | 0.84 | 0.99 | -0.66 | 0.45 | 0.92 | 0.84 | 0.99 | -0.67 | 0.44 | 0.84 | 0.80 | 0.96 |
| Streptococcus         | 2.71  | 0.04 | 0.06 | 0.13 | 0.31 | 2.49  | 0.05 | 0.08 | 0.21 | 0.44 | 2.01  | 0.13 | 0.15 | 0.60 | 0.61 | 2.03  | 0.12 | 0.15 | 0.60 | 0.59 | 2.22  | 0.10 | 0.16 | 0.51 | 0.63 |
| Subdoligranulum       | 2.72  | 0.01 | 0.09 | 0.04 | 0.35 | 2.38  | 0.01 | 0.07 | 0.09 | 0.44 | 1.79  | 0.08 | 0.11 | 0.50 | 0.59 | 1.79  | 0.08 | 0.11 | 0.50 | 0.59 | 1.89  | 0.07 | 0.09 | 0.44 | 0.62 |
| Sutterella            | -1.67 | 0.01 | 0.18 | 0.03 | 0.46 | -1.28 | 0.03 | 0.19 | 0.16 | 0.58 | -1.25 | 0.04 | 0.24 | 0.31 | 0.65 | -1.25 | 0.04 | 0.24 | 0.31 | 0.65 | -1.22 | 0.05 | 0.27 | 0.34 | 0.71 |
| TM7x                  | 0.01  | 1.00 | 0.67 | 1.00 | 0.84 | -0.16 | 0.91 | 0.96 | 0.94 | 0.98 | -0.06 | 0.97 | 0.97 | 0.98 | 0.99 | -0.06 | 0.97 | 0.97 | 0.98 | 1.00 | 0.08  | 0.95 | 0.92 | 0.97 | 0.97 |
| Turicibacter          | -1.42 | 0.35 | 0.27 | 0.56 | 0.56 | -0.76 | 0.60 | 0.30 | 0.79 | 0.63 | -0.73 | 0.65 | 0.41 | 0.87 | 0.81 | -0.72 | 0.65 | 0.41 | 0.86 | 0.81 | -0.69 | 0.67 | 0.48 | 0.84 | 0.83 |
| Tuzzerella            | 0.32  | 0.77 | 0.05 | 0.88 | 0.31 | 0.29  | 0.78 | 0.07 | 0.87 | 0.44 | 0.43  | 0.70 | 0.14 | 0.87 | 0.59 | 0.43  | 0.70 | 0.14 | 0.86 | 0.59 | 0.42  | 0.71 | 0.13 | 0.87 | 0.63 |
| UBA1819               | 1.32  | 0.33 | 0.17 | 0.54 | 0.45 | 1.02  | 0.43 | 0.20 | 0.70 | 0.58 | 1.80  | 0.19 | 0.14 | 0.60 | 0.59 | 1.79  | 0.19 | 0.14 | 0.61 | 0.59 | 1.71  | 0.22 | 0.16 | 0.65 | 0.63 |
| UCG.002               | 1.50  | 0.03 | 0.20 | 0.12 | 0.49 | 1.00  | 0.14 | 0.25 | 0.42 | 0.59 | 0.74  | 0.30 | 0.19 | 0.72 | 0.64 | 0.74  | 0.30 | 0.19 | 0.73 | 0.64 | 0.78  | 0.28 | 0.17 | 0.72 | 0.63 |
| UCG.003               | 1.01  | 0.22 | 1.00 | 0.41 | 1.00 | 0.72  | 0.35 | 0.73 | 0.60 | 0.88 | 0.32  | 0.70 | 0.80 | 0.87 | 0.96 | 0.32  | 0.70 | 0.80 | 0.86 | 0.96 | 0.43  | 0.61 | 0.69 | 0.80 | 0.91 |
| UCG.005               | 2.32  | 0.01 | 0.13 | 0.04 | 0.42 | 1.65  | 0.05 | 0.25 | 0.21 | 0.59 | 0.63  | 0.48 | 0.53 | 0.84 | 0.88 | 0.63  | 0.48 | 0.53 | 0.84 | 0.88 | 0.78  | 0.39 | 0.46 | 0.80 | 0.83 |
| UCG.009               | 2.32  | 0.10 | 0.49 | 0.26 | 0.74 | 1.40  | 0.30 | 0.52 | 0.55 | 0.83 | 0.17  | 0.90 | 0.94 | 0.95 | 0.99 | 0.17  | 0.90 | 0.93 | 0.95 | 0.99 | 0.28  | 0.84 | 0.90 | 0.91 | 0.97 |
| Veillonella           | 0.77  | 0.41 | 0.72 | 0.63 | 0.87 | 0.91  | 0.31 | 0.92 | 0.56 | 0.98 | 0.40  | 0.67 | 0.59 | 0.87 | 0.88 | 0.41  | 0.67 | 0.60 | 0.86 | 0.88 | 0.54  | 0.58 | 0.64 | 0.80 | 0.87 |
| Victivallis           | 1.49  | 0.13 | 0.55 | 0.31 | 0.79 | 1.24  | 0.19 | 0.71 | 0.49 | 0.87 | 0.56  | 0.59 | 0.42 | 0.84 | 0.81 | 0.56  | 0.58 | 0.42 | 0.84 | 0.81 | 0.53  | 0.61 | 0.34 | 0.80 | 0.73 |

Multivariable-adjusted regression models adjusted for:

Model 1: sequencing batch, age, race, gender, study center

Model 2: Model 1, with education

Model 3: Model 2, with physical activity, diet score, medication use, and smoking

Model 4: Model 3 with BMI

Model 5: Model 4 with hypertension and diabetes

eTable 20: Multivariable-adjusted regression coefficients, p-values, race interaction p-values, false discovery rate (FDR)-adjusted p-values for race-genera interactions with respect to Stroop.

|                               | Model1 |         |           |      |         | Model2 |         |           |      |         | Model3 |         |           |      |         | Model4 |         |           |      |         | Model5 |         |           |      |         |
|-------------------------------|--------|---------|-----------|------|---------|--------|---------|-----------|------|---------|--------|---------|-----------|------|---------|--------|---------|-----------|------|---------|--------|---------|-----------|------|---------|
|                               | beta   | p-value | p-val Int | FDR  | FDR-int | beta   | p-value | p-val Int | FDR  | FDR-int | beta   | p-value | p-val Int | FDR  | FDR-int | beta   | p-value | p-val Int | FDR  | FDR-int | beta   | p-value | p-val Int | FDR  | FDR-int |
| Acetanaerobacterium           | -0.89  | 0.53    | 0.37      | 0.76 | 0.68    | -0.88  | 0.53    | 0.49      | 0.79 | 0.78    | -0.21  | 0.89    | 0.72      | 0.99 | 0.87    | -0.20  | 0.89    | 0.71      | 0.99 | 0.89    | -0.24  | 0.87    | 0.73      | 0.96 | 0.91    |
| Acidaminococcus               | 0.36   | 0.39    | 0.84      | 0.64 | 0.91    | 0.24   | 0.56    | 0.95      | 0.79 | 0.96    | -0.47  | 0.29    | 0.18      | 0.76 | 0.60    | -0.48  | 0.29    | 0.18      | 0.76 | 0.60    | -0.49  | 0.28    | 0.17      | 0.70 | 0.59    |
| Actinomyces                   | -0.09  | 0.94    | 0.85      | 0.94 | 0.91    | -0.30  | 0.79    | 0.93      | 0.91 | 0.96    | -1.27  | 0.27    | 0.84      | 0.76 | 0.94    | -1.27  | 0.27    | 0.84      | 0.76 | 0.94    | -1.32  | 0.26    | 0.79      | 0.70 | 0.91    |
| Adlercreutzia                 | -0.19  | 0.80    | 0.60      | 0.84 | 0.82    | -0.04  | 0.96    | 0.75      | 0.97 | 0.92    | -0.02  | 0.98    | 0.69      | 0.99 | 0.87    | -0.01  | 0.98    | 0.68      | 1.00 | 0.89    | -0.03  | 0.97    | 0.68      | 0.97 | 0.88    |
| Agathobacter                  | -0.69  | 0.47    | 0.71      | 0.69 | 0.85    | -0.61  | 0.52    | 0.74      | 0.79 | 0.92    | 0.28   | 0.77    | 0.95      | 0.98 | 0.98    | 0.26   | 0.79    | 0.95      | 0.99 | 0.97    | 0.10   | 0.92    | 0.91      | 0.96 | 1.00    |
| Akkermansia                   | -1.22  | 0.01    | 0.04      | 0.10 | 0.30    | -1.05  | 0.03    | 0.05      | 0.22 | 0.36    | -0.82  | 0.11    | 0.14      | 0.62 | 0.60    | -0.82  | 0.11    | 0.14      | 0.63 | 0.59    | -0.82  | 0.12    | 0.14      | 0.56 | 0.58    |
| Alistipes                     | -0.36  | 0.67    | 0.99      | 0.82 | 0.99    | -0.16  | 0.85    | 0.89      | 0.91 | 0.96    | 0.27   | 0.75    | 0.73      | 0.98 | 0.87    | 0.26   | 0.76    | 0.74      | 0.99 | 0.89    | 0.23   | 0.78    | 0.76      | 0.96 | 0.91    |
| Allisonella                   | 1.29   | 0.11    | 0.58      | 0.32 | 0.82    | -0.85  | 0.29    | 0.67      | 0.62 | 0.90    | 0.50   | 0.56    | 0.92      | 0.98 | 0.97    | 0.50   | 0.56    | 0.94      | 0.98 | 0.97    | 0.56   | 0.53    | 0.96      | 0.91 | 1.00    |
| Anaerofilum                   | -1.41  | 0.21    | 0.09      | 0.46 | 0.41    | -0.98  | 0.38    | 0.11      | 0.68 | 0.44    | -1.14  | 0.32    | 0.08      | 0.76 | 0.60    | -1.13  | 0.33    | 0.08      | 0.76 | 0.59    | -1.21  | 0.30    | 0.07      | 0.72 | 0.57    |
| Anaerostipes                  | 0.30   | 0.77    | 0.67      | 0.84 | 0.85    | 0.51   | 0.61    | 0.63      | 0.81 | 0.87    | 0.93   | 0.35    | 0.48      | 0.79 | 0.77    | 0.92   | 0.36    | 0.49      | 0.79 | 0.78    | 0.79   | 0.45    | 0.57      | 0.86 | 0.84    |
| Anaerotruncus                 | -1.78  | 0.05    | 0.01      | 0.22 | 0.20    | -1.66  | 0.07    | 0.01      | 0.29 | 0.21    | -1.23  | 0.19    | 0.03      | 0.71 | 0.35    | -1.20  | 0.20    | 0.03      | 0.75 | 0.33    | -1.34  | 0.16    | 0.02      | 0.61 | 0.29    |
| Bacteroides                   | -2.49  | 0.07    | 0.06      | 0.25 | 0.36    | -2.31  | 0.10    | 0.06      | 0.32 | 0.39    | -2.24  | 0.10    | 0.04      | 0.62 | 0.49    | -2.30  | 0.09    | 0.04      | 0.62 | 0.46    | -2.19  | 0.11    | 0.05      | 0.56 | 0.47    |
| Barnesiella                   | -0.38  | 0.43    | 0.49      | 0.66 | 0.73    | -0.42  | 0.38    | 0.55      | 0.68 | 0.83    | -0.27  | 0.58    | 0.41      | 0.98 | 0.77    | -0.27  | 0.59    | 0.41      | 0.98 | 0.78    | -0.33  | 0.51    | 0.46      | 0.90 | 0.76    |
| Bifidobacterium               | 0.36   | 0.57    | 0.18      | 0.76 | 0.51    | 0.24   | 0.71    | 0.14      | 0.87 | 0.49    | 0.08   | 0.91    | 0.33      | 0.99 | 0.73    | 0.06   | 0.93    | 0.34      | 1.00 | 0.72    | 0.07   | 0.92    | 0.34      | 0.96 | 0.75    |
| Blifilphia                    | -0.36  | 0.57    | 0.81      | 0.76 | 0.91    | -0.13  | 0.83    | 0.59      | 0.91 | 0.85    | -0.10  | 0.87    | 0.72      | 0.98 | 0.87    | -0.12  | 0.85    | 0.73      | 0.99 | 0.89    | -0.07  | 0.91    | 0.70      | 0.96 | 0.90    |
| Blautia                       | -3.89  | 0.05    | 0.03      | 0.22 | 0.30    | -3.70  | 0.06    | 0.03      | 0.29 | 0.27    | -4.04  | 0.05    | 0.02      | 0.51 | 0.35    | -4.09  | 0.04    | 0.02      | 0.51 | 0.33    | -5.33  | 0.01    | 0.01      | 0.40 | 0.29    |
| Butyrivibrio                  | -3.58  | 0.01    | 0.00      | 0.07 | 0.12    | -3.04  | 0.03    | 0.00      | 0.19 | 0.11    | -1.61  | 0.25    | 0.02      | 0.76 | 0.35    | -1.64  | 0.24    | 0.02      | 0.76 | 0.33    | -1.75  | 0.21    | 0.02      | 0.65 | 0.29    |
| Butyricimonas                 | -0.88  | 0.09    | 0.59      | 0.28 | 0.82    | -0.80  | 0.12    | 0.59      | 0.37 | 0.85    | -0.83  | 0.12    | 0.33      | 0.62 | 0.73    | -0.83  | 0.12    | 0.33      | 0.64 | 0.72    | -0.85  | 0.11    | 0.32      | 0.56 | 0.75    |
| CAG_56                        | -0.29  | 0.64    | 0.48      | 0.81 | 0.73    | -0.26  | 0.67    | 0.60      | 0.85 | 0.86    | 0.53   | 0.39    | 0.18      | 0.79 | 0.60    | 0.53   | 0.40    | 0.18      | 0.79 | 0.60    | 0.45   | 0.48    | 0.22      | 0.87 | 0.66    |
| Candidatus_Soleaferrea        | -1.50  | 0.23    | 0.06      | 0.50 | 0.36    | -1.40  | 0.26    | 0.05      | 0.60 | 0.36    | -2.19  | 0.08    | 0.02      | 0.62 | 0.35    | -2.19  | 0.08    | 0.02      | 0.62 | 0.33    | -2.27  | 0.08    | 0.02      | 0.53 | 0.29    |
| Caproiciproducens             | -1.10  | 0.31    | 0.68      | 0.55 | 0.85    | -1.00  | 0.34    | 0.76      | 0.65 | 0.92    | -0.30  | 0.79    | 0.90      | 0.98 | 0.97    | -0.29  | 0.79    | 0.90      | 0.99 | 0.97    | -0.36  | 0.75    | 0.92      | 0.96 | 1.00    |
| Christensenellaceae_R.7_group | -1.66  | 0.00    | 0.19      | 0.03 | 0.51    | -1.46  | 0.01    | 0.27      | 0.06 | 0.60    | -0.81  | 0.14    | 0.88      | 0.64 | 0.96    | -0.80  | 0.14    | 0.88      | 0.64 | 0.96    | -0.92  | 0.10    | 0.76      | 0.56 | 0.91    |
| Clostridium_sensu_stricto_1   | 0.84   | 0.24    | 0.26      | 0.50 | 0.60    | 0.72   | 0.31    | 0.31      | 0.62 | 0.63    | 1.09   | 0.14    | 0.14      | 0.64 | 0.60    | 1.08   | 0.14    | 0.14      | 0.64 | 0.59    | 1.12   | 0.13    | 0.13      | 0.57 | 0.58    |
| Colidextribacter              | -0.71  | 0.54    | 0.35      | 0.76 | 0.66    | -0.68  | 0.56    | 0.25      | 0.79 | 0.60    | -1.19  | 0.31    | 0.16      | 0.76 | 0.60    | -1.20  | 0.30    | 0.15      | 0.76 | 0.59    | -1.61  | 0.18    | 0.10      | 0.64 | 0.58    |
| Collinsella                   | 0.13   | 0.81    | 0.84      | 0.84 | 0.91    | -0.13  | 0.82    | 0.92      | 0.91 | 0.96    | 0.09   | 0.87    | 0.72      | 0.98 | 0.87    | 0.09   | 0.87    | 0.70      | 0.99 | 0.89    | 0.16   | 0.79    | 0.64      | 0.96 | 0.88    |
| Coprobacter                   | -0.77  | 0.27    | 0.13      | 0.53 | 0.48    | -0.68  | 0.33    | 0.12      | 0.63 | 0.46    | -0.14  | 0.85    | 0.31      | 0.98 | 0.73    | -0.12  | 0.86    | 0.32      | 0.99 | 0.72    | -0.11  | 0.87    | 0.33      | 0.96 | 0.75    |
| Coprococcus                   | 0.18   | 0.79    | 0.48      | 0.84 | 0.73    | 0.09   | 0.90    | 0.62      | 0.93 | 0.86    | -0.05  | 0.94    | 0.90      | 0.99 | 0.97    | -0.05  | 0.94    | 0.90      | 1.00 | 0.97    | -0.15  | 0.83    | 0.99      | 0.96 | 1.00    |
| Defluviitaleaceae_UCG.011     | -3.76  | 0.00    | 0.02      | 0.01 | 0.21    | -3.61  | 0.00    | 0.02      | 0.02 | 0.22    | -2.74  | 0.01    | 0.12      | 0.49 | 0.60    | -2.73  | 0.01    | 0.12      | 0.51 | 0.59    | -2.97  | 0.01    | 0.10      | 0.29 | 0.58    |
| Desulfovibrio                 | -0.08  | 0.88    | 0.81      | 0.89 | 0.91    | -0.12  | 0.83    | 0.83      | 0.91 | 0.95    | -0.09  | 0.87    | 0.93      | 0.98 | 0.97    | -0.07  | 0.90    | 0.92      | 0.99 | 0.97    | -0.18  | 0.75    | 0.98      | 0.96 | 1.00    |
| Dialister                     | 0.36   | 0.42    | 0.62      | 0.65 | 0.82    | 0.31   | 0.49    | 0.71      | 0.79 | 0.91    | 0.40   | 0.39    | 0.66      | 0.79 | 0.87    | 0.40   | 0.39    | 0.66      | 0.79 | 0.89    | 0.39   | 0.41    | 0.68      | 0.85 | 0.88    |
| DNF00809                      | -1.98  | 0.08    | 0.27      | 0.27 | 0.60    | -1.96  | 0.08    | 0.23      | 0.31 | 0.60    | -2.10  | 0.07    | 0.27      | 0.62 | 0.73    | -2.10  | 0.07    | 0.27      | 0.62 | 0.72    | -2.13  | 0.07    | 0.27      | 0.53 | 0.73    |
| Dorea                         | -1.44  | 0.06    | 0.30      | 0.23 | 0.63    | -1.45  | 0.06    | 0.33      | 0.29 | 0.64    | -1.56  | 0.04    | 0.24      | 0.51 | 0.70    | -1.56  | 0.04    | 0.25      | 0.51 | 0.71    | -1.50  | 0.05    | 0.27      | 0.53 | 0.73    |
| DTU089                        | -1.39  | 0.12    | 0.07      | 0.33 | 0.36    | -1.22  | 0.17    | 0.10      | 0.48 | 0.43    | -1.00  | 0.27    | 0.17      | 0.76 | 0.60    | -1.00  | 0.27    | 0.17      | 0.76 | 0.59    | -1.19  | 0.20    | 0.13      | 0.65 | 0.58    |
| Eggerthella                   | 0.34   | 0.69    | 0.65      | 0.82 | 0.84    | 0.51   | 0.54    | 0.77      | 0.79 | 0.92    | -0.38  | 0.66    | 0.30      | 0.98 | 0.73    | -0.39  | 0.65    | 0.28      | 0.99 | 0.72    | -0.43  | 0.63    | 0.27      | 0.95 | 0.73    |
| Eisenbergiella                | 0.29   | 0.72    | 0.33      | 0.83 | 0.64    | 0.30   | 0.71    | 0.31      | 0.87 | 0.63    | -0.46  | 0.58    | 0.81      | 0.98 | 0.94    | -0.45  | 0.59    | 0.82      | 0.98 | 0.94    | -0.49  | 0.56    | 0.86      | 0.91 | 0.97    |
| Erysipelatoclostridium        | 0.19   | 0.83    | 0.70      | 0.84 | 0.85    | 0.23   | 0.79    | 0.62      | 0.91 | 0.86    | -0.36  | 0.68    | 0.96      | 0.98 | 0.98    | -0.36  | 0.69    | 0.95      | 0.99 | 0.97    | -0.36  | 0.69    | 0.95      | 0.96 | 1.00    |
| Erysipelotrichaceae_UCG.003   | -0.55  | 0.40    | 0.94      | 0.64 | 0.97    | -0.54  | 0.41    | 0.99      | 0.71 | 0.99    | 0.12   | 0.86    | 0.37      | 0.98 | 0.76    | 0.13   | 0.85    | 0.37      | 0.99 | 0.74    | 0.04   | 0.95    | 0.43      | 0.97 | 0.75    |
| Escherichia_Shigella          | 0.25   | 0.67    | 0.93      | 0.82 | 0.97    | 0.01   | 0.99    | 0.86      | 0.99 | 0.96    | -0.32  | 0.60    | 0.50      | 0.98 | 0.77    | -0.33  | 0.59    | 0.49      | 0.98 | 0.78    | -0.30  | 0.63    | 0.51      | 0.95 | 0.77    |
| Faecalibacterium              | -1.06  | 0.33    | 0.32      | 0.56 | 0.63    | -0.70  | 0.51    | 0.21      | 0.79 | 0.59    | -0.32  | 0.76    | 0.15      | 0.98 | 0.60    | -0.34  | 0.75    | 0.16      | 0.99 | 0.59    | -0.55  | 0.61    | 0.22      | 0.95 | 0.66    |
| Family_XIII_AD3011_group      | -2.27  | 0.01    | 0.03      | 0.05 | 0.28    | -1.98  | 0.02    | 0.04      | 0.14 | 0.32    | -0.94  | 0.28    | 0.19      | 0.76 | 0.60    | -0.92  | 0.30    | 0.19      | 0.76 | 0.60    | -1.06  | 0.24    | 0.16      | 0.67 | 0.59    |
| Family_XIII_UCG.001           | -2.19  | 0.03    | 0.10      | 0.19 | 0.42    | -2.05  | 0.05    | 0.09      | 0.26 | 0.43    | -0.97  | 0.36    | 0.53      | 0.79 | 0.77    | -0.94  | 0.38    | 0.53      | 0.79 | 0.78    | -1.08  | 0.32    | 0.49      | 0.75 | 0.76    |
| FD2005                        | -0.25  | 0.79    | 0.58      | 0.84 | 0.82    | -0.60  | 0.52    | 0.85      | 0.79 | 0.96    | 0.28   | 0.77    | 0.34      | 0.98 | 0.74    | 0.28   | 0.76    | 0.33      | 0.99 | 0.72    | 0.16   | 0.87    | 0.37      | 0.96 | 0.75    |
| Flavonifractor                | 0.60   | 0.46    | 0.60      | 0.68 | 0.82    | 0.65   | 0.42    | 0.51      | 0.71 | 0.79    | -0.42  | 0.62    | 0.84      | 0.98 | 0.94    | -0.43  | 0.61    | 0.82      | 0.98 | 0.94    | -0.51  | 0.56    | 0.78      | 0.91 | 0.91    |
| Fournierella                  | -1.28  | 0.19    | 0.22      | 0.45 | 0.52    | -1.15  | 0.24    | 0.26      | 0.58 | 0.60    | -0.22  | 0.83    | 0.61      | 0.98 | 0.87    | -0.19  | 0.85    | 0.62      | 0.99 | 0.88    | -0.44  | 0.67    | 0.49      | 0.96 | 0.76    |
| Frisingococcus                | -0.52  | 0.48    | 0.13      | 0.70 | 0.48    | -0.40  | 0.58    | 0.15      | 0.80 | 0.49    | -0.32  | 0.67    | 0.15      | 0.98 | 0.60    | -0.31  | 0.68    | 0.14      | 0.99 | 0.59    | -0.31  | 0.69    | 0.14      | 0.96 | 0.58    |
| Fusibacterium                 | -0.88  | 0.19    | 0.48      | 0.45 | 0.73    | -0.77  | 0.25    | 0.47      | 0.58 | 0.77    | -0.69  | 0.33    | 0.51      | 0.76 | 0.77    | -0.71  | 0.31    | 0.51      | 0.76 | 0.78    | -0.78  | 0.28    | 0.45      | 0.70 | 0.76    |
| Fusobacterium                 | 1.58   | 0.05    | 0.52      | 0.21 | 0.77    | 1.37   | 0.08    | 0.59      | 0.31 | 0.85    | 0.71   | 0.38    | 0.58      | 0.79 | 0.83    | 0.73   | 0.37    | 0.58      | 0.79 | 0.83    | 0.66   | 0.43    | 0.56      | 0.85 | 0.83    |
| GCA.900066575                 | -2.08  | 0.03    | 0.28      | 0.16 | 0.62    | -1.84  | 0.05    | 0.28      | 0.26 | 0.61    | -1.12  | 0.24    | 0.51      | 0.76 | 0.77    | -1.11  | 0.25    | 0.51      | 0.76 | 0.78    | -1.23  | 0.21    | 0.49      | 0.65 | 0.76    |
| Gordonibacter                 | -0.85  | 0.40    | 0.20      | 0.64 | 0.52    | -0.49  | 0.63    | 0.32      | 0.82 | 0.63    | -0.18  | 0.86    | 0.38      | 0.98 | 0.76    | -0.15  | 0.89    | 0.38      | 0.99 | 0.75    | -0.16  | 0.88    | 0.38      | 0.96 | 0.75    |
| Granulicatella                | 0.40   | 0.72    | 0.47      | 0.83 | 0.73    | 0.21   | 0.85    | 0.59      | 0.91 | 0.85    | -0.34  | 0.77    | 0.72      | 0.98 | 0.87    | -0.37  | 0.75    | 0.74      | 0.99 | 0.89    | -0.37  | 0.75    | 0.76      | 0.96 | 0.91</  |

|                       |       |      |      |      |      |       |      |      |      |      |       |      |      |      |      |       |      |      |      |      |       |       |      |      |      |
|-----------------------|-------|------|------|------|------|-------|------|------|------|------|-------|------|------|------|------|-------|------|------|------|------|-------|-------|------|------|------|
| Monoglobus            | -2.21 | 0.00 | 0.30 | 0.03 | 0.63 | -2.03 | 0.01 | 0.37 | 0.06 | 0.66 | -0.23 | 0.77 | 0.33 | 0.98 | 0.73 | -0.23 | 0.77 | 0.33 | 0.99 | 0.72 | -0.37 | 0.64  | 0.40 | 0.95 | 0.75 |
| Moryella              | -2.32 | 0.04 | 0.16 | 0.21 | 0.49 | -2.04 | 0.08 | 0.17 | 0.30 | 0.53 | -0.42 | 0.73 | 0.69 | 0.98 | 0.87 | -0.41 | 0.74 | 0.69 | 0.99 | 0.89 | -0.58 | 0.64  | 0.62 | 0.95 | 0.87 |
| Negativibacillus      | -0.86 | 0.20 | 0.17 | 0.45 | 0.51 | -0.98 | 0.14 | 0.12 | 0.43 | 0.47 | -1.22 | 0.08 | 0.11 | 0.62 | 0.60 | -1.21 | 0.08 | 0.11 | 0.62 | 0.59 | -1.24 | 0.08  | 0.11 | 0.53 | 0.58 |
| NK4A214_group         | -1.52 | 0.01 | 0.02 | 0.05 | 0.23 | -1.40 | 0.01 | 0.02 | 0.10 | 0.22 | -0.74 | 0.19 | 0.14 | 0.71 | 0.60 | -0.73 | 0.20 | 0.15 | 0.75 | 0.59 | -0.85 | 0.14  | 0.11 | 0.57 | 0.58 |
| Odoribacter           | -0.51 | 0.30 | 0.14 | 0.55 | 0.48 | -0.33 | 0.51 | 0.26 | 0.79 | 0.60 | -0.38 | 0.46 | 0.11 | 0.87 | 0.60 | -0.38 | 0.46 | 0.11 | 0.87 | 0.59 | -0.49 | 0.34  | 0.09 | 0.78 | 0.58 |
| Oscillibacter         | -1.65 | 0.07 | 0.39 | 0.23 | 0.69 | -1.61 | 0.07 | 0.32 | 0.29 | 0.63 | -1.28 | 0.17 | 0.50 | 0.67 | 0.77 | -1.27 | 0.17 | 0.50 | 0.69 | 0.78 | -1.32 | 0.17  | 0.49 | 0.61 | 0.76 |
| Oscilospira           | -1.25 | 0.28 | 0.42 | 0.53 | 0.70 | -1.19 | 0.30 | 0.49 | 0.62 | 0.78 | -1.38 | 0.23 | 0.51 | 0.76 | 0.77 | -1.39 | 0.23 | 0.50 | 0.76 | 0.78 | -1.75 | 0.14  | 0.39 | 0.57 | 0.75 |
| Oxalobacter           | -1.06 | 0.25 | 0.80 | 0.50 | 0.91 | -0.78 | 0.40 | 0.76 | 0.69 | 0.92 | 0.71  | 0.46 | 0.40 | 0.87 | 0.77 | 0.72  | 0.46 | 0.40 | 0.87 | 0.77 | 0.70  | 0.48  | 0.43 | 0.87 | 0.75 |
| Paludicola            | -2.92 | 0.00 | 0.01 | 0.03 | 0.20 | -2.74 | 0.00 | 0.01 | 0.06 | 0.18 | -1.77 | 0.08 | 0.06 | 0.62 | 0.59 | -1.75 | 0.08 | 0.06 | 0.62 | 0.59 | -1.83 | 0.07  | 0.05 | 0.53 | 0.47 |
| Parabacteroides       | -0.28 | 0.68 | 0.72 | 0.82 | 0.86 | -0.27 | 0.69 | 0.92 | 0.87 | 0.96 | -0.21 | 0.76 | 0.93 | 0.98 | 0.97 | -0.22 | 0.74 | 0.94 | 0.99 | 0.97 | -0.26 | 0.70  | 0.98 | 0.96 | 1.00 |
| Paraprevotella        | 0.88  | 0.07 | 0.06 | 0.23 | 0.36 | 0.85  | 0.07 | 0.05 | 0.29 | 0.36 | 0.84  | 0.09 | 0.07 | 0.62 | 0.60 | 0.85  | 0.09 | 0.07 | 0.62 | 0.59 | 0.90  | 0.08  | 0.06 | 0.53 | 0.47 |
| Parasutterella        | -1.47 | 0.00 | 0.08 | 0.03 | 0.38 | -1.38 | 0.00 | 0.09 | 0.06 | 0.43 | -1.05 | 0.04 | 0.16 | 0.51 | 0.60 | -1.06 | 0.04 | 0.16 | 0.51 | 0.59 | -1.12 | 0.03  | 0.14 | 0.49 | 0.58 |
| Peptococcus           | -3.11 | 0.00 | 0.00 | 0.03 | 0.10 | -2.83 | 0.00 | 0.00 | 0.06 | 0.11 | -2.22 | 0.03 | 0.01 | 0.51 | 0.28 | -2.21 | 0.03 | 0.01 | 0.51 | 0.29 | -2.21 | 0.04  | 0.01 | 0.49 | 0.27 |
| Phascolarctobacterium | -0.55 | 0.23 | 0.70 | 0.50 | 0.85 | -0.53 | 0.24 | 0.79 | 0.58 | 0.92 | -0.57 | 0.23 | 0.66 | 0.76 | 0.87 | -0.57 | 0.23 | 0.66 | 0.76 | 0.89 | -0.59 | 0.22  | 0.65 | 0.65 | 0.88 |
| Phocaea               | 1.03  | 0.35 | 0.99 | 0.58 | 0.99 | 1.20  | 0.27 | 0.93 | 0.61 | 0.96 | 0.96  | 0.38 | 0.72 | 0.79 | 0.87 | 0.95  | 0.39 | 0.72 | 0.79 | 0.89 | 0.86  | 0.44  | 0.68 | 0.86 | 0.88 |
| Prevotella            | 0.83  | 0.04 | 0.32 | 0.21 | 0.63 | 0.76  | 0.06 | 0.24 | 0.29 | 0.60 | 0.58  | 0.16 | 0.38 | 0.66 | 0.76 | 0.59  | 0.16 | 0.36 | 0.64 | 0.74 | 0.52  | 0.22  | 0.43 | 0.65 | 0.75 |
| Romboutsia            | 0.37  | 0.63 | 0.19 | 0.81 | 0.51 | 0.25  | 0.75 | 0.20 | 0.91 | 0.55 | 0.04  | 0.96 | 0.31 | 0.99 | 0.73 | 0.02  | 0.98 | 0.33 | 1.00 | 0.72 | -0.04 | 0.97  | 0.36 | 0.97 | 0.75 |
| Roseburia             | -0.48 | 0.56 | 0.91 | 0.76 | 0.96 | -0.42 | 0.61 | 0.88 | 0.81 | 0.96 | 0.05  | 0.96 | 0.86 | 0.99 | 0.95 | 0.04  | 0.96 | 0.86 | 0.86 | 1.00 | 0.95  | -0.22 | 0.80 | 0.95 | 1.00 |
| Ruminococcus          | -1.10 | 0.04 | 0.07 | 0.21 | 0.36 | -0.93 | 0.09 | 0.08 | 0.31 | 0.42 | -0.40 | 0.49 | 0.28 | 0.88 | 0.73 | -0.39 | 0.49 | 0.28 | 0.89 | 0.72 | -0.48 | 0.41  | 0.22 | 0.85 | 0.66 |
| Sellimonas            | -0.21 | 0.80 | 0.70 | 0.84 | 0.85 | -0.16 | 0.84 | 0.75 | 0.91 | 0.92 | -0.54 | 0.51 | 0.99 | 0.91 | 1.00 | -0.53 | 0.53 | 1.00 | 0.94 | 1.00 | -0.55 | 0.51  | 1.00 | 0.90 | 1.00 |
| Senegalimassilia      | 0.21  | 0.77 | 0.27 | 0.84 | 0.60 | 0.10  | 0.88 | 0.35 | 0.92 | 0.64 | 0.66  | 0.36 | 0.14 | 0.79 | 0.60 | 0.68  | 0.34 | 0.14 | 0.78 | 0.59 | 0.62  | 0.39  | 0.15 | 0.84 | 0.58 |
| Shuttleworthia        | -3.06 | 0.00 | 0.01 | 0.03 | 0.16 | -2.68 | 0.00 | 0.01 | 0.06 | 0.18 | -2.28 | 0.02 | 0.02 | 0.51 | 0.35 | -2.27 | 0.02 | 0.02 | 0.51 | 0.33 | -2.26 | 0.02  | 0.02 | 0.40 | 0.29 |
| Slackia               | -1.28 | 0.05 | 0.15 | 0.21 | 0.49 | -1.28 | 0.04 | 0.19 | 0.25 | 0.55 | -0.94 | 0.15 | 0.23 | 0.64 | 0.69 | -0.94 | 0.15 | 0.24 | 0.64 | 0.70 | -0.96 | 0.14  | 0.24 | 0.57 | 0.68 |
| Streptococcus         | -1.06 | 0.27 | 0.99 | 0.53 | 0.99 | -1.00 | 0.29 | 0.94 | 0.62 | 0.96 | -0.97 | 0.32 | 0.68 | 0.76 | 0.87 | -0.98 | 0.32 | 0.71 | 0.76 | 0.89 | -0.87 | 0.39  | 0.66 | 0.84 | 0.88 |
| Subdoligranulum       | -2.80 | 0.00 | 0.00 | 0.01 | 0.10 | -2.69 | 0.00 | 0.00 | 0.02 | 0.09 | -2.72 | 0.00 | 0.00 | 0.03 | 0.09 | -2.71 | 0.00 | 0.00 | 0.03 | 0.09 | -2.93 | 0.00  | 0.00 | 0.01 | 0.05 |
| Sutterella            | 0.85  | 0.05 | 0.07 | 0.22 | 0.36 | 0.72  | 0.10 | 0.07 | 0.32 | 0.40 | 0.38  | 0.41 | 0.19 | 0.80 | 0.60 | 0.38  | 0.41 | 0.19 | 0.79 | 0.60 | 0.41  | 0.37  | 0.18 | 0.83 | 0.59 |
| TM7x                  | -1.01 | 0.33 | 0.42 | 0.56 | 0.70 | -0.97 | 0.34 | 0.32 | 0.65 | 0.63 | -0.88 | 0.40 | 0.43 | 0.79 | 0.77 | -0.90 | 0.39 | 0.42 | 0.79 | 0.78 | -1.03 | 0.33  | 0.36 | 0.77 | 0.75 |
| Turicibacter          | 0.33  | 0.77 | 0.36 | 0.84 | 0.68 | 0.08  | 0.94 | 0.39 | 0.96 | 0.69 | -0.58 | 0.63 | 0.65 | 0.98 | 0.87 | -0.60 | 0.61 | 0.67 | 0.98 | 0.89 | -0.59 | 0.63  | 0.64 | 0.95 | 0.88 |
| Tuzzerella            | 0.39  | 0.62 | 0.65 | 0.81 | 0.84 | 0.38  | 0.62 | 0.72 | 0.82 | 0.91 | -0.07 | 0.93 | 0.43 | 0.99 | 0.77 | -0.06 | 0.94 | 0.43 | 1.00 | 0.78 | -0.05 | 0.96  | 0.44 | 0.97 | 0.75 |
| UBA1819               | -1.34 | 0.18 | 0.21 | 0.43 | 0.52 | -1.25 | 0.20 | 0.22 | 0.53 | 0.59 | -2.35 | 0.02 | 0.05 | 0.51 | 0.56 | -2.34 | 0.02 | 0.05 | 0.51 | 0.56 | -2.52 | 0.02  | 0.05 | 0.40 | 0.47 |
| UCG.002               | -0.69 | 0.17 | 0.16 | 0.43 | 0.49 | -0.52 | 0.31 | 0.18 | 0.62 | 0.54 | -0.04 | 0.95 | 0.35 | 0.99 | 0.74 | -0.02 | 0.97 | 0.36 | 1.00 | 0.74 | -0.13 | 0.81  | 0.29 | 0.96 | 0.75 |
| UCG.003               | -1.07 | 0.67 | 0.37 | 0.25 | 0.68 | -0.97 | 0.10 | 0.30 | 0.32 | 0.63 | -0.68 | 0.26 | 0.43 | 0.76 | 0.77 | -0.68 | 0.27 | 0.43 | 0.76 | 0.78 | -0.67 | 0.28  | 0.43 | 0.70 | 0.75 |
| UCG.005               | -2.31 | 0.00 | 0.01 | 0.01 | 0.17 | -2.10 | 0.00 | 0.02 | 0.03 | 0.21 | -1.37 | 0.04 | 0.08 | 0.51 | 0.60 | -1.36 | 0.04 | 0.08 | 0.51 | 0.59 | -1.56 | 0.02  | 0.06 | 0.40 | 0.47 |
| UCG.009               | -1.00 | 0.34 | 0.87 | 0.57 | 0.92 | -0.69 | 0.51 | 0.90 | 0.79 | 0.96 | 0.31  | 0.77 | 0.52 | 0.98 | 0.77 | 0.30  | 0.78 | 0.53 | 0.99 | 0.78 | 0.18  | 0.86  | 0.58 | 0.96 | 0.84 |
| Veillonella           | 0.56  | 0.42 | 0.21 | 0.65 | 0.52 | 0.49  | 0.47 | 0.26 | 0.79 | 0.60 | 0.72  | 0.31 | 0.20 | 0.76 | 0.61 | 0.71  | 0.32 | 0.21 | 0.76 | 0.63 | 0.80  | 0.28  | 0.19 | 0.70 | 0.61 |
| Victivallis           | -0.40 | 0.58 | 0.30 | 0.77 | 0.63 | -0.32 | 0.66 | 0.35 | 0.85 | 0.64 | 0.53  | 0.49 | 0.11 | 0.88 | 0.60 | 0.54  | 0.48 | 0.11 | 0.89 | 0.59 | 0.55  | 0.48  | 0.11 | 0.87 | 0.58 |

Multivariable-adjusted regression models adjusted for:

Model 1: sequencing batch, age, race, gender, study center

Model 2: Model 1, with education

Model 3: Model 2, with physical activity, diet score, medication use, and smoking

Model 4: Model 3 with BMI

Model 5: Model 4 with hypertension and diabetes

eTable 21: Multivariable-adjusted regression coefficients, p-values, race interaction p-values, false discovery rate (FDR)-adjusted p-values for race-genera interactions with respect to RAVLT.

|                               | Model1 |         |           |      |         | Model2 |         |           |      |         | Model3 |         |           |      |         | Model4 |         |           |      |         | Model5 |         |           |      |         |
|-------------------------------|--------|---------|-----------|------|---------|--------|---------|-----------|------|---------|--------|---------|-----------|------|---------|--------|---------|-----------|------|---------|--------|---------|-----------|------|---------|
|                               | beta   | p-value | p-val Int | FDR  | FDR-int | beta   | p-value | p-val Int | FDR  | FDR-int | beta   | p-value | p-val Int | FDR  | FDR-int | beta   | p-value | p-val Int | FDR  | FDR-int | beta   | p-value | p-val Int | FDR  | FDR-int |
| Acetanaerobacterium           | -0.03  | 0.89    | 0.93      | 0.94 | 0.97    | -0.03  | 0.89    | 0.71      | 1.00 | 0.92    | -0.12  | 0.61    | 0.90      | 0.94 | 0.97    | -0.12  | 0.60    | 0.91      | 0.93 | 0.97    | -0.12  | 0.60    | 0.97      | 0.92 | 0.98    |
| Acidaminococcus               | -0.12  | 0.06    | 0.45      | 0.52 | 0.76    | -0.09  | 0.15    | 0.65      | 0.83 | 0.89    | -0.03  | 0.62    | 0.26      | 0.94 | 0.67    | -0.03  | 0.64    | 0.26      | 0.94 | 0.68    | -0.03  | 0.63    | 0.27      | 0.92 | 0.67    |
| Actinomyces                   | -0.23  | 0.18    | 0.28      | 0.71 | 0.70    | -0.18  | 0.28    | 0.33      | 0.83 | 0.71    | -0.14  | 0.43    | 0.40      | 0.91 | 0.73    | -0.14  | 0.43    | 0.41      | 0.90 | 0.73    | -0.15  | 0.42    | 0.36      | 0.91 | 0.74    |
| Adlercreutzia                 | 0.20   | 0.09    | 0.83      | 0.68 | 0.94    | 0.15   | 0.20    | 0.85      | 0.83 | 0.94    | 0.11   | 0.38    | 0.77      | 0.91 | 0.95    | 0.11   | 0.38    | 0.77      | 0.89 | 0.94    | 0.10   | 0.41    | 0.77      | 0.91 | 0.91    |
| Agathobacter                  | -0.26  | 0.08    | 0.17      | 0.61 | 0.64    | -0.29  | 0.04    | 0.13      | 0.71 | 0.53    | -0.38  | 0.01    | 0.07      | 0.45 | 0.67    | -0.38  | 0.01    | 0.07      | 0.47 | 0.66    | -0.37  | 0.02    | 0.08      | 0.56 | 0.67    |
| Akkermansia                   | 0.11   | 0.15    | 0.84      | 0.71 | 0.94    | 0.05   | 0.47    | 0.86      | 0.94 | 0.94    | 0.02   | 0.84    | 0.62      | 0.97 | 0.88    | 0.02   | 0.84    | 0.63      | 0.97 | 0.89    | 0.01   | 0.88    | 0.59      | 0.97 | 0.85    |
| Alistipes                     | 0.13   | 0.33    | 0.43      | 0.74 | 0.76    | 0.06   | 0.61    | 0.27      | 0.96 | 0.68    | 0.02   | 0.86    | 0.46      | 0.97 | 0.76    | 0.03   | 0.85    | 0.48      | 0.97 | 0.77    | 0.02   | 0.85    | 0.50      | 0.96 | 0.81    |
| Allisonella                   | -0.28  | 0.03    | 0.59      | 0.38 | 0.87    | -0.13  | 0.29    | 0.82      | 0.83 | 0.94    | -0.08  | 0.54    | 0.92      | 0.94 | 0.97    | -0.08  | 0.54    | 0.95      | 0.93 | 0.97    | -0.08  | 0.56    | 0.95      | 0.92 | 0.98    |
| Anaerofilum                   | 0.24   | 0.17    | 0.94      | 0.71 | 0.97    | 0.11   | 0.52    | 0.81      | 0.94 | 0.94    | 0.08   | 0.65    | 0.75      | 0.94 | 0.95    | 0.08   | 0.67    | 0.75      | 0.94 | 0.94    | 0.08   | 0.66    | 0.75      | 0.92 | 0.91    |
| Anaerostipes                  | 0.07   | 0.65    | 0.88      | 0.89 | 0.97    | 0.01   | 0.95    | 0.96      | 1.00 | 0.97    | 0.00   | 0.98    | 0.96      | 0.99 | 0.97    | 0.00   | 1.00    | 0.93      | 1.00 | 0.97    | 0.02   | 0.92    | 0.91      | 0.97 | 0.98    |
| Anaerotruncus                 | 0.05   | 0.74    | 0.90      | 0.93 | 0.97    | 0.00   | 0.98    | 0.96      | 1.00 | 0.97    | -0.04  | 0.79    | 0.81      | 0.96 | 0.95    | -0.04  | 0.76    | 0.79      | 0.95 | 0.95    | -0.04  | 0.78    | 0.78      | 0.96 | 0.91    |
| Bacteroides                   | 0.14   | 0.51    | 0.57      | 0.81 | 0.87    | 0.09   | 0.68    | 0.61      | 0.97 | 0.88    | 0.04   | 0.85    | 0.78      | 0.97 | 0.95    | 0.05   | 0.81    | 0.76      | 0.96 | 0.94    | 0.04   | 0.86    | 0.76      | 0.96 | 0.91    |
| Barnesiella                   | 0.01   | 0.86    | 0.08      | 0.94 | 0.54    | 0.02   | 0.74    | 0.10      | 0.99 | 0.53    | 0.03   | 0.70    | 0.31      | 0.94 | 0.70    | 0.03   | 0.71    | 0.30      | 0.94 | 0.68    | 0.04   | 0.65    | 0.32      | 0.92 | 0.74    |
| Bifidobacterium               | 0.08   | 0.44    | 0.30      | 0.79 | 0.70    | 0.12   | 0.22    | 0.38      | 0.83 | 0.73    | 0.09   | 0.39    | 0.64      | 0.91 | 0.88    | 0.09   | 0.37    | 0.62      | 0.89 | 0.89    | 0.09   | 0.36    | 0.61      | 0.90 | 0.85    |
| Biflophia                     | 0.15   | 0.12    | 0.83      | 0.70 | 0.94    | 0.08   | 0.38    | 0.72      | 0.93 | 0.92    | 0.10   | 0.34    | 0.96      | 0.89 | 0.97    | 0.10   | 0.32    | 0.99      | 0.86 | 0.99    | 0.09   | 0.36    | 0.98      | 0.90 | 0.98    |
| Blautia                       | 0.16   | 0.62    | 0.70      | 0.89 | 0.92    | 0.09   | 0.77    | 0.61      | 0.99 | 0.88    | 0.10   | 0.74    | 0.68      | 0.94 | 0.91    | 0.11   | 0.73    | 0.65      | 0.94 | 0.89    | 0.17   | 0.61    | 0.60      | 0.92 | 0.85    |
| Butyrivibrio                  | -0.01  | 0.97    | 0.46      | 0.97 | 0.76    | -0.20  | 0.33    | 0.29      | 0.87 | 0.68    | -0.25  | 0.25    | 0.43      | 0.89 | 0.73    | -0.24  | 0.26    | 0.44      | 0.86 | 0.75    | -0.25  | 0.26    | 0.41      | 0.90 | 0.76    |
| Butyrivibrio                  | 0.06   | 0.43    | 0.83      | 0.79 | 0.94    | 0.04   | 0.64    | 0.83      | 0.96 | 0.94    | 0.06   | 0.47    | 0.59      | 0.94 | 0.86    | 0.06   | 0.47    | 0.61      | 0.93 | 0.88    | 0.06   | 0.44    | 0.55      | 0.92 | 0.83    |
| CAG_56                        | -0.04  | 0.64    | 0.08      | 0.89 | 0.54    | -0.05  | 0.57    | 0.14      | 0.96 | 0.53    | -0.08  | 0.41    | 0.17      | 0.91 | 0.67    | -0.08  | 0.42    | 0.17      | 0.90 | 0.67    | -0.07  | 0.45    | 0.18      | 0.92 | 0.67    |
| Candidatus_Soleaferrea        | 0.19   | 0.34    | 0.10      | 0.74 | 0.54    | 0.16   | 0.41    | 0.07      | 0.93 | 0.53    | 0.12   | 0.56    | 0.13      | 0.94 | 0.67    | 0.12   | 0.56    | 0.13      | 0.93 | 0.67    | 0.12   | 0.56    | 0.11      | 0.92 | 0.67    |
| Caproiciproducens             | -0.04  | 0.82    | 0.66      | 0.94 | 0.89    | -0.07  | 0.66    | 0.45      | 0.96 | 0.82    | -0.16  | 0.34    | 0.38      | 0.89 | 0.73    | -0.17  | 0.34    | 0.38      | 0.86 | 0.73    | -0.18  | 0.32    | 0.36      | 0.90 | 0.74    |
| Christensenellaceae_R.7_group | 0.04   | 0.67    | 0.27      | 0.90 | 0.70    | -0.04  | 0.65    | 0.11      | 0.96 | 0.53    | -0.09  | 0.30    | 0.10      | 0.89 | 0.67    | -0.09  | 0.28    | 0.09      | 0.86 | 0.67    | -0.09  | 0.30    | 0.10      | 0.90 | 0.67    |
| Clostridium_sensu_stricto_1   | 0.04   | 0.74    | 0.43      | 0.93 | 0.76    | 0.07   | 0.51    | 0.54      | 0.94 | 0.85    | 0.03   | 0.79    | 0.37      | 0.96 | 0.73    | 0.03   | 0.78    | 0.38      | 0.95 | 0.73    | 0.03   | 0.79    | 0.40      | 0.96 | 0.76    |
| Colidextribacter              | -0.21  | 0.26    | 0.95      | 0.74 | 0.97    | -0.22  | 0.21    | 0.77      | 0.83 | 0.94    | -0.19  | 0.29    | 0.25      | 0.89 | 0.67    | -0.19  | 0.30    | 0.23      | 0.86 | 0.68    | -0.17  | 0.35    | 0.23      | 0.90 | 0.67    |
| Collinsella                   | -0.30  | 0.00    | 0.10      | 0.06 | 0.54    | -0.22  | 0.01    | 0.13      | 0.52 | 0.53    | -0.22  | 0.01    | 0.14      | 0.45 | 0.67    | -0.22  | 0.01    | 0.14      | 0.47 | 0.67    | -0.23  | 0.01    | 0.12      | 0.56 | 0.67    |
| Coprobacter                   | -0.05  | 0.65    | 0.54      | 0.89 | 0.84    | -0.08  | 0.45    | 0.57      | 0.94 | 0.86    | -0.07  | 0.53    | 0.93      | 0.94 | 0.97    | -0.07  | 0.51    | 0.92      | 0.93 | 0.97    | -0.08  | 0.50    | 0.89      | 0.92 | 0.98    |
| Coprococcus                   | -0.08  | 0.47    | 0.04      | 0.81 | 0.48    | -0.05  | 0.64    | 0.10      | 0.96 | 0.53    | -0.06  | 0.55    | 0.16      | 0.94 | 0.67    | -0.06  | 0.55    | 0.16      | 0.93 | 0.67    | -0.05  | 0.62    | 0.19      | 0.92 | 0.67    |
| Defluviitaleaceae_UCG.011     | 0.15   | 0.34    | 0.32      | 0.74 | 0.70    | 0.10   | 0.52    | 0.25      | 0.94 | 0.68    | 0.05   | 0.74    | 0.20      | 0.94 | 0.67    | 0.05   | 0.75    | 0.20      | 0.95 | 0.68    | 0.06   | 0.72    | 0.22      | 0.96 | 0.67    |
| Desulfobivrio                 | -0.10  | 0.25    | 0.53      | 0.74 | 0.84    | -0.09  | 0.27    | 0.53      | 0.83 | 0.85    | -0.08  | 0.38    | 0.88      | 0.91 | 0.97    | -0.08  | 0.34    | 0.85      | 0.86 | 0.97    | -0.08  | 0.39    | 0.87      | 0.91 | 0.98    |
| Dialister                     | -0.05  | 0.44    | 0.22      | 0.79 | 0.66    | -0.04  | 0.54    | 0.29      | 0.94 | 0.68    | -0.08  | 0.30    | 0.19      | 0.89 | 0.67    | -0.08  | 0.30    | 0.18      | 0.86 | 0.67    | -0.08  | 0.30    | 0.18      | 0.90 | 0.67    |
| DNF0809                       | -0.21  | 0.25    | 0.02      | 0.74 | 0.48    | -0.22  | 0.21    | 0.03      | 0.83 | 0.53    | -0.26  | 0.15    | 0.02      | 0.89 | 0.59    | -0.26  | 0.15    | 0.02      | 0.86 | 0.61    | -0.26  | 0.15    | 0.02      | 0.90 | 0.56    |
| Dorea                         | -0.17  | 0.17    | 0.22      | 0.71 | 0.66    | -0.16  | 0.16    | 0.14      | 0.83 | 0.53    | -0.13  | 0.28    | 0.30      | 0.89 | 0.70    | -0.13  | 0.29    | 0.30      | 0.86 | 0.68    | -0.14  | 0.26    | 0.28      | 0.90 | 0.67    |
| DTU089                        | -0.08  | 0.56    | 0.54      | 0.84 | 0.84    | -0.15  | 0.27    | 0.27      | 0.83 | 0.68    | -0.17  | 0.22    | 0.26      | 0.89 | 0.67    | -0.17  | 0.22    | 0.27      | 0.86 | 0.68    | -0.16  | 0.26    | 0.28      | 0.90 | 0.67    |
| Eggerthella                   | 0.21   | 0.11    | 0.31      | 0.69 | 0.70    | 0.16   | 0.20    | 0.47      | 0.83 | 0.82    | 0.18   | 0.18    | 0.37      | 0.89 | 0.73    | 0.18   | 0.17    | 0.35      | 0.86 | 0.73    | 0.18   | 0.18    | 0.39      | 0.90 | 0.76    |
| Eisenbergiella                | 0.02   | 0.86    | 0.31      | 0.94 | 0.70    | 0.02   | 0.88    | 0.33      | 1.00 | 0.71    | -0.01  | 0.93    | 0.47      | 0.99 | 0.77    | -0.02  | 0.91    | 0.45      | 0.97 | 0.75    | -0.01  | 0.93    | 0.50      | 0.97 | 0.81    |
| Erysipelatoclostridium        | 0.26   | 0.06    | 0.06      | 0.52 | 0.48    | 0.24   | 0.06    | 0.09      | 0.71 | 0.53    | 0.22   | 0.10    | 0.18      | 0.89 | 0.67    | 0.22   | 0.11    | 0.18      | 0.86 | 0.67    | 0.23   | 0.10    | 0.17      | 0.90 | 0.67    |
| Erysipelotrichaceae_UCG.003   | -0.04  | 0.68    | 0.45      | 0.90 | 0.76    | -0.04  | 0.65    | 0.52      | 0.96 | 0.85    | -0.12  | 0.25    | 0.25      | 0.89 | 0.67    | -0.12  | 0.25    | 0.25      | 0.86 | 0.68    | -0.12  | 0.27    | 0.28      | 0.90 | 0.67    |
| Escherichia_Shigella          | -0.01  | 0.92    | 0.62      | 0.95 | 0.88    | 0.07   | 0.45    | 0.30      | 0.94 | 0.69    | 0.05   | 0.59    | 0.55      | 0.94 | 0.84    | 0.05   | 0.58    | 0.54      | 0.93 | 0.83    | 0.05   | 0.61    | 0.56      | 0.92 | 0.83    |
| Faecalibacterium              | 0.19   | 0.27    | 0.89      | 0.74 | 0.97    | 0.07   | 0.67    | 0.50      | 0.96 | 0.85    | 0.01   | 0.94    | 0.29      | 0.99 | 0.70    | 0.02   | 0.93    | 0.29      | 0.97 | 0.68    | 0.04   | 0.83    | 0.35      | 0.96 | 0.74    |
| Family_XIII_AD3011_group      | 0.04   | 0.77    | 0.16      | 0.93 | 0.64    | -0.06  | 0.64    | 0.09      | 0.96 | 0.53    | -0.13  | 0.36    | 0.17      | 0.91 | 0.67    | -0.13  | 0.34    | 0.17      | 0.86 | 0.67    | -0.13  | 0.35    | 0.17      | 0.90 | 0.67    |
| Family_XIII_UCG.001           | -0.11  | 0.48    | 0.05      | 0.81 | 0.48    | -0.15  | 0.32    | 0.05      | 0.85 | 0.53    | -0.16  | 0.34    | 0.10      | 0.89 | 0.67    | -0.16  | 0.32    | 0.10      | 0.86 | 0.67    | -0.16  | 0.34    | 0.11      | 0.90 | 0.67    |
| FD2005                        | -0.20  | 0.17    | 0.18      | 0.71 | 0.64    | -0.08  | 0.55    | 0.56      | 0.94 | 0.86    | -0.14  | 0.33    | 0.33      | 0.89 | 0.72    | -0.14  | 0.33    | 0.32      | 0.86 | 0.70    | -0.13  | 0.38    | 0.37      | 0.91 | 0.74    |
| Flavonifractor                | 0.05   | 0.69    | 0.16      | 0.90 | 0.64    | 0.03   | 0.79    | 0.24      | 1.00 | 0.68    | -0.02  | 0.91    | 0.42      | 0.99 | 0.73    | -0.01  | 0.93    | 0.40      | 0.97 | 0.73    | -0.01  | 0.93    | 0.41      | 0.97 | 0.76    |
| Fournierella                  | 0.01   | 0.96    | 0.70      | 0.97 | 0.92    | -0.03  | 0.82    | 0.51      | 1.00 | 0.85    | -0.05  | 0.75    | 0.39      | 0.94 | 0.73    | -0.06  | 0.72    | 0.38      | 0.94 | 0.73    | -0.03  | 0.84    | 0.45      | 0.96 | 0.77    |
| Frisingococcus                | 0.17   | 0.14    | 0.09      | 0.71 | 0.54    | 0.13   | 0.24    | 0.13      | 0.83 | 0.53    | 0.06   | 0.62    | 0.18      | 0.94 | 0.67    | 0.06   | 0.63    | 0.17      | 0.94 | 0.67    | 0.05   | 0.66    | 0.21      | 0.92 | 0.67    |
| Fusicatenibacter              | -0.17  | 0.11    | 0.03      | 0.69 | 0.48    | -0.20  | 0.05    | 0.03      | 0.71 | 0.53    | -0.23  | 0.03    | 0.05      | 0.65 | 0.64    | -0.23  | 0.03    | 0.05      | 0.70 | 0.61    | -0.24  | 0.03    | 0.04      | 0.62 | 0.56    |
| Fusobacterium                 | -0.13  | 0.29    | 0.84      | 0.74 | 0.94    | -0.07  | 0.58    | 0.65      | 0.96 | 0.89    | 0.00   | 0.99    | 0.92      | 0.99 | 0.97    | 0.00   | 0.97    | 0.92      | 1.00 | 0.97    | 0.00   | 0.99    | 0.98      | 0.99 | 0.98    |
| GCA_900066575                 | 0.05   | 0.74    | 0.66      | 0.93 | 0.89    | -0.03  | 0.83    | 0.66      | 1.00 | 0.89    | -0.08  | 0.59    | 0.69      | 0.94 | 0.91    | -0.09  | 0.57    | 0.69      | 0.93 | 0.91    | -0.08  | 0.61    | 0.58      | 0.92 | 0.84    |
| Gordonibacter                 | 0.37   | 0.02    | 0.40      | 0.34 | 0.76    | 0.25   | 0.10    | 0.84      | 0.83 | 0.94    | 0.22   | 0.18    | 0.75      | 0.89 | 0.95    | 0.21   | 0.18    | 0.74      | 0.86 | 0.94    | 0.21   | 0.20    | 0.77      | 0.90 | 0.91    |
| Granulicatella                | 0.05   | 0.78    | 0.64      | 0.93 | 0.88    | 0.10   | 0.53    | 0.92      | 0.94 | 0.97    | 0.07   | 0.71    | 0.73      | 0.94 | 0.94    | 0.07   | 0.69    | 0.76      | 0.94 | 0.94    | 0.08   | 0.68    | 0.72      | 0.92 | 0.91    |

|                       |       |      |      |      |      |       |      |      |      |      |       |      |      |      |      |       |      |      |      |      |       |      |      |      |      |
|-----------------------|-------|------|------|------|------|-------|------|------|------|------|-------|------|------|------|------|-------|------|------|------|------|-------|------|------|------|------|
| Monoglobus            | 0.10  | 0.37 | 0.05 | 0.76 | 0.48 | 0.04  | 0.74 | 0.02 | 0.99 | 0.53 | -0.06 | 0.59 | 0.00 | 0.94 | 0.11 | -0.06 | 0.59 | 0.00 | 0.93 | 0.12 | -0.06 | 0.61 | 0.00 | 0.92 | 0.16 |
| Moryella              | -0.03 | 0.87 | 0.20 | 0.94 | 0.66 | -0.11 | 0.52 | 0.17 | 0.94 | 0.59 | -0.20 | 0.29 | 0.19 | 0.89 | 0.67 | -0.20 | 0.29 | 0.19 | 0.86 | 0.67 | -0.19 | 0.31 | 0.19 | 0.90 | 0.67 |
| Negativibacillus      | -0.14 | 0.18 | 0.73 | 0.71 | 0.93 | -0.11 | 0.29 | 0.96 | 0.83 | 0.97 | -0.09 | 0.38 | 0.89 | 0.91 | 0.97 | -0.10 | 0.37 | 0.91 | 0.89 | 0.97 | -0.10 | 0.35 | 0.91 | 0.90 | 0.98 |
| NK4A214_group         | -0.08 | 0.37 | 0.04 | 0.76 | 0.48 | -0.12 | 0.16 | 0.03 | 0.83 | 0.53 | -0.13 | 0.13 | 0.07 | 0.89 | 0.67 | -0.14 | 0.12 | 0.07 | 0.86 | 0.66 | -0.13 | 0.14 | 0.07 | 0.90 | 0.67 |
| Odoribacter           | 0.14  | 0.08 | 0.61 | 0.61 | 0.87 | 0.08  | 0.30 | 0.89 | 0.83 | 0.96 | 0.09  | 0.26 | 0.59 | 0.89 | 0.86 | 0.09  | 0.26 | 0.60 | 0.86 | 0.88 | 0.10  | 0.23 | 0.52 | 0.90 | 0.82 |
| Oscillibacter         | 0.11  | 0.43 | 0.30 | 0.79 | 0.70 | 0.09  | 0.49 | 0.39 | 0.94 | 0.73 | 0.01  | 0.97 | 0.46 | 0.99 | 0.76 | 0.00  | 0.99 | 0.46 | 1.00 | 0.75 | -0.01 | 0.96 | 0.43 | 0.99 | 0.77 |
| Oscillospira          | 0.04  | 0.85 | 0.98 | 0.94 | 0.98 | 0.00  | 0.98 | 0.72 | 1.00 | 0.92 | -0.06 | 0.75 | 0.64 | 0.94 | 0.88 | -0.06 | 0.75 | 0.66 | 0.95 | 0.89 | -0.04 | 0.83 | 0.71 | 0.96 | 0.91 |
| Oxalobacter           | 0.02  | 0.88 | 0.04 | 0.94 | 0.48 | -0.07 | 0.61 | 0.04 | 0.96 | 0.53 | -0.11 | 0.45 | 0.10 | 0.92 | 0.67 | -0.12 | 0.44 | 0.10 | 0.90 | 0.67 | -0.12 | 0.42 | 0.08 | 0.91 | 0.67 |
| Paludicola            | 0.06  | 0.68 | 0.64 | 0.90 | 0.88 | 0.00  | 0.99 | 0.78 | 1.00 | 0.94 | -0.03 | 0.83 | 0.94 | 0.97 | 0.97 | -0.04 | 0.79 | 0.94 | 0.95 | 0.97 | -0.05 | 0.77 | 0.95 | 0.96 | 0.98 |
| Parabacteroides       | 0.03  | 0.77 | 0.22 | 0.93 | 0.66 | 0.03  | 0.77 | 0.47 | 0.99 | 0.82 | 0.05  | 0.61 | 0.42 | 0.94 | 0.73 | 0.06  | 0.59 | 0.41 | 0.93 | 0.73 | 0.06  | 0.55 | 0.37 | 0.92 | 0.74 |
| Paraprevotella        | -0.09 | 0.22 | 0.14 | 0.74 | 0.62 | -0.08 | 0.26 | 0.08 | 0.83 | 0.53 | -0.06 | 0.44 | 0.23 | 0.91 | 0.67 | -0.06 | 0.42 | 0.23 | 0.90 | 0.68 | -0.06 | 0.43 | 0.23 | 0.91 | 0.67 |
| Parasutterella        | 0.18  | 0.02 | 0.52 | 0.34 | 0.84 | 0.16  | 0.03 | 0.64 | 0.71 | 0.89 | 0.09  | 0.26 | 0.73 | 0.89 | 0.94 | 0.09  | 0.26 | 0.73 | 0.86 | 0.94 | 0.09  | 0.25 | 0.66 | 0.90 | 0.89 |
| Peptococcus           | 0.11  | 0.50 | 0.96 | 0.81 | 0.97 | 0.01  | 0.95 | 0.78 | 1.00 | 0.94 | -0.08 | 0.62 | 0.78 | 0.94 | 0.95 | -0.09 | 0.60 | 0.78 | 0.93 | 0.94 | -0.09 | 0.58 | 0.71 | 0.92 | 0.91 |
| Phascolarctobacterium | 0.11  | 0.12 | 0.15 | 0.70 | 0.62 | 0.11  | 0.12 | 0.19 | 0.83 | 0.60 | -0.11 | 0.15 | 0.25 | 0.89 | 0.67 | 0.10  | 0.16 | 0.25 | 0.86 | 0.68 | 0.11  | 0.14 | 0.22 | 0.90 | 0.67 |
| Phocaea               | -0.33 | 0.06 | 0.45 | 0.52 | 0.76 | -0.38 | 0.02 | 0.32 | 0.69 | 0.71 | -0.41 | 0.02 | 0.36 | 0.45 | 0.73 | -0.41 | 0.02 | 0.36 | 0.47 | 0.73 | -0.40 | 0.02 | 0.42 | 0.56 | 0.76 |
| Prevotella            | -0.06 | 0.37 | 0.25 | 0.76 | 0.70 | -0.04 | 0.52 | 0.39 | 0.94 | 0.73 | -0.01 | 0.91 | 0.27 | 0.99 | 0.68 | -0.01 | 0.90 | 0.29 | 0.97 | 0.68 | 0.00  | 0.98 | 0.25 | 0.99 | 0.67 |
| Romboutsia            | -0.03 | 0.82 | 0.59 | 0.94 | 0.87 | 0.01  | 0.96 | 0.61 | 1.00 | 0.88 | -0.05 | 0.66 | 0.49 | 0.94 | 0.78 | -0.05 | 0.69 | 0.52 | 0.94 | 0.81 | -0.04 | 0.74 | 0.57 | 0.96 | 0.84 |
| Roseburia             | -0.06 | 0.63 | 0.36 | 0.89 | 0.74 | -0.08 | 0.49 | 0.37 | 0.94 | 0.72 | -0.21 | 0.12 | 0.11 | 0.89 | 0.67 | -0.21 | 0.12 | 0.11 | 0.86 | 0.67 | -0.19 | 0.16 | 0.14 | 0.90 | 0.67 |
| Ruminococcus          | 0.06  | 0.51 | 0.20 | 0.81 | 0.66 | 0.00  | 0.96 | 0.14 | 1.00 | 0.53 | -0.07 | 0.42 | 0.05 | 0.91 | 0.64 | -0.07 | 0.41 | 0.05 | 0.90 | 0.61 | -0.07 | 0.42 | 0.05 | 0.91 | 0.56 |
| Sellimonas            | -0.02 | 0.86 | 0.05 | 0.94 | 0.48 | -0.04 | 0.73 | 0.05 | 0.99 | 0.53 | -0.05 | 0.70 | 0.05 | 0.94 | 0.64 | -0.05 | 0.67 | 0.05 | 0.94 | 0.61 | -0.06 | 0.66 | 0.05 | 0.92 | 0.56 |
| Senegalimassilia      | -0.24 | 0.03 | 0.14 | 0.39 | 0.62 | -0.21 | 0.05 | 0.25 | 0.71 | 0.68 | -0.22 | 0.05 | 0.26 | 0.76 | 0.67 | -0.22 | 0.05 | 0.25 | 0.80 | 0.68 | -0.21 | 0.06 | 0.26 | 0.85 | 0.67 |
| Shuttleworthia        | 0.30  | 0.05 | 0.96 | 0.52 | 0.97 | 0.16  | 0.25 | 0.85 | 0.83 | 0.94 | 0.17  | 0.28 | 0.80 | 0.89 | 0.95 | 0.16  | 0.29 | 0.81 | 0.86 | 0.96 | 0.16  | 0.32 | 0.89 | 0.90 | 0.98 |
| Slackia               | -0.25 | 0.01 | 0.17 | 0.34 | 0.64 | -0.25 | 0.01 | 0.08 | 0.52 | 0.53 | -0.25 | 0.01 | 0.10 | 0.45 | 0.67 | -0.25 | 0.01 | 0.09 | 0.47 | 0.67 | -0.26 | 0.01 | 0.11 | 0.56 | 0.67 |
| Streptococcus         | 0.17  | 0.26 | 0.77 | 0.74 | 0.94 | 0.14  | 0.32 | 0.91 | 0.85 | 0.97 | 0.15  | 0.31 | 0.79 | 0.89 | 0.95 | 0.16  | 0.30 | 0.83 | 0.86 | 0.96 | 0.15  | 0.32 | 0.75 | 0.90 | 0.91 |
| Subdoligranulum       | 0.07  | 0.52 | 0.32 | 0.81 | 0.70 | 0.04  | 0.74 | 0.33 | 0.99 | 0.71 | 0.01  | 0.95 | 0.43 | 0.99 | 0.73 | 0.01  | 0.96 | 0.43 | 1.00 | 0.75 | 0.02  | 0.90 | 0.48 | 0.97 | 0.81 |
| Sutterella            | -0.17 | 0.02 | 0.32 | 0.34 | 0.70 | -0.12 | 0.06 | 0.34 | 0.71 | 0.71 | -0.08 | 0.29 | 0.59 | 0.89 | 0.86 | -0.08 | 0.29 | 0.59 | 0.86 | 0.87 | -0.07 | 0.31 | 0.63 | 0.90 | 0.86 |
| TM7x                  | -0.20 | 0.21 | 0.10 | 0.74 | 0.54 | -0.22 | 0.15 | 0.18 | 0.83 | 0.60 | -0.16 | 0.31 | 0.36 | 0.89 | 0.73 | -0.16 | 0.32 | 0.37 | 0.86 | 0.73 | -0.16 | 0.34 | 0.34 | 0.90 | 0.74 |
| Turicibacter          | 0.18  | 0.31 | 0.46 | 0.74 | 0.76 | 0.25  | 0.13 | 0.51 | 0.83 | 0.85 | 0.23  | 0.22 | 0.43 | 0.89 | 0.73 | 0.23  | 0.21 | 0.45 | 0.86 | 0.75 | 0.23  | 0.21 | 0.50 | 0.90 | 0.81 |
| Tuzzerella            | 0.03  | 0.79 | 0.11 | 0.94 | 0.58 | 0.03  | 0.80 | 0.16 | 1.00 | 0.58 | -0.03 | 0.81 | 0.29 | 0.97 | 0.70 | -0.03 | 0.80 | 0.30 | 0.95 | 0.68 | -0.04 | 0.77 | 0.28 | 0.96 | 0.67 |
| UBA1819               | 0.01  | 0.94 | 0.89 | 0.96 | 0.97 | -0.02 | 0.89 | 0.98 | 1.00 | 0.98 | -0.08 | 0.63 | 0.84 | 0.94 | 0.97 | -0.08 | 0.60 | 0.83 | 0.93 | 0.96 | -0.09 | 0.57 | 0.86 | 0.92 | 0.98 |
| UCG.002               | 0.07  | 0.39 | 0.39 | 0.77 | 0.76 | 0.01  | 0.86 | 0.29 | 1.00 | 0.68 | -0.01 | 0.89 | 0.40 | 0.99 | 0.73 | -0.01 | 0.87 | 0.39 | 0.97 | 0.73 | -0.01 | 0.93 | 0.44 | 0.97 | 0.77 |
| UCG.003               | -0.09 | 0.35 | 0.08 | 0.74 | 0.54 | -0.12 | 0.18 | 0.14 | 0.83 | 0.53 | -0.16 | 0.10 | 0.18 | 0.89 | 0.67 | -0.16 | 0.10 | 0.18 | 0.86 | 0.67 | -0.16 | 0.09 | 0.18 | 0.90 | 0.67 |
| UCG.005               | -0.03 | 0.72 | 0.14 | 0.93 | 0.62 | -0.11 | 0.23 | 0.05 | 0.83 | 0.53 | -0.18 | 0.08 | 0.04 | 0.89 | 0.64 | -0.19 | 0.07 | 0.04 | 0.85 | 0.61 | -0.19 | 0.08 | 0.04 | 0.90 | 0.56 |
| UCG.009               | -0.02 | 0.89 | 0.24 | 0.94 | 0.70 | -0.12 | 0.42 | 0.20 | 0.93 | 0.62 | -0.20 | 0.22 | 0.17 | 0.89 | 0.67 | -0.20 | 0.23 | 0.17 | 0.86 | 0.67 | -0.19 | 0.24 | 0.17 | 0.90 | 0.67 |
| Veillonella           | 0.10  | 0.34 | 0.75 | 0.74 | 0.94 | 0.12  | 0.25 | 0.95 | 0.83 | 0.97 | 0.06  | 0.61 | 0.51 | 0.94 | 0.79 | 0.06  | 0.58 | 0.53 | 0.93 | 0.83 | 0.07  | 0.57 | 0.53 | 0.92 | 0.82 |
| Victivallis           | -0.06 | 0.60 | 0.04 | 0.89 | 0.48 | -0.09 | 0.42 | 0.06 | 0.93 | 0.53 | -0.13 | 0.28 | 0.13 | 0.89 | 0.67 | -0.13 | 0.27 | 0.13 | 0.86 | 0.67 | -0.13 | 0.27 | 0.11 | 0.90 | 0.67 |

Multivariable-adjusted regression models adjusted for:

Model 1: sequencing batch, age, race, gender, study center

Model 2: Model 1, with education

Model 3: Model 2, with physical activity, diet score, medication use, and smoking

Model 4: Model 3 with BMI

Model 5: Model 4 with hypertension and diabetes



eTable 22: Multivariable-adjusted regression coefficients, p-values, race interaction p-values, false discovery rate (FDR)-adjusted p-values for race-genera interactions with respect to category fluency.

|                               | Model1 |         |           |      |         | Model2 |         |           |      |         | Model3 |         |           |      |         | Model4 |         |           |      |         | Model5 |         |           |      |         |
|-------------------------------|--------|---------|-----------|------|---------|--------|---------|-----------|------|---------|--------|---------|-----------|------|---------|--------|---------|-----------|------|---------|--------|---------|-----------|------|---------|
|                               | beta   | p-value | p-val int | FDR  | FDR-int | beta   | p-value | p-val int | FDR  | FDR-int | beta   | p-value | p-val int | FDR  | FDR-int | beta   | p-value | p-val int | FDR  | FDR-int | beta   | p-value | p-val int | FDR  | FDR-int |
| Acetanaerobacterium           | -0.58  | 0.36    | 0.37      | 0.69 | 0.80    | -0.58  | 0.35    | 0.19      | 0.79 | 0.75    | -0.42  | 0.53    | 0.40      | 0.91 | 0.81    | -0.43  | 0.52    | 0.41      | 0.92 | 0.85    | -0.38  | 0.57    | 0.52      | 0.97 | 0.88    |
| Acidaminococcus               | -0.25  | 0.18    | 0.62      | 0.51 | 0.86    | -0.16  | 0.36    | 0.81      | 0.79 | 0.93    | -0.18  | 0.38    | 1.00      | 0.91 | 1.00    | -0.17  | 0.41    | 0.99      | 0.92 | 0.99    | -0.17  | 0.41    | 0.98      | 0.97 | 0.98    |
| Actinomyces                   | -0.85  | 0.09    | 0.15      | 0.44 | 0.68    | -0.72  | 0.13    | 0.18      | 0.63 | 0.75    | -0.64  | 0.23    | 0.20      | 0.90 | 0.81    | -0.64  | 0.23    | 0.20      | 0.90 | 0.81    | -0.68  | 0.21    | 0.16      | 0.97 | 0.75    |
| Adlercreutzia                 | -0.31  | 0.35    | 0.22      | 0.69 | 0.68    | -0.44  | 0.18    | 0.11      | 0.69 | 0.75    | -0.58  | 0.10    | 0.07      | 0.85 | 0.81    | -0.59  | 0.10    | 0.08      | 0.90 | 0.80    | -0.60  | 0.09    | 0.08      | 0.97 | 0.75    |
| Agathobacter                  | -0.10  | 0.82    | 0.44      | 0.92 | 0.81    | -0.16  | 0.70    | 0.38      | 0.93 | 0.80    | -0.24  | 0.58    | 0.43      | 0.91 | 0.83    | -0.21  | 0.64    | 0.42      | 0.96 | 0.85    | -0.17  | 0.70    | 0.41      | 0.97 | 0.88    |
| Akkermansia                   | 0.34   | 0.13    | 0.08      | 0.46 | 0.68    | 0.20   | 0.36    | 0.14      | 0.79 | 0.75    | 0.18   | 0.46    | 0.16      | 0.91 | 0.81    | 0.18   | 0.45    | 0.15      | 0.92 | 0.80    | 0.15   | 0.53    | 0.18      | 0.97 | 0.75    |
| Alistipes                     | 0.45   | 0.24    | 0.20      | 0.56 | 0.68    | 0.30   | 0.42    | 0.27      | 0.82 | 0.77    | 0.11   | 0.77    | 0.33      | 0.96 | 0.81    | 0.13   | 0.73    | 0.30      | 0.96 | 0.83    | 0.14   | 0.72    | 0.25      | 0.97 | 0.87    |
| Allisonella                   | 0.14   | 0.69    | 0.65      | 0.89 | 0.86    | 0.54   | 0.13    | 0.44      | 0.63 | 0.82    | 0.56   | 0.15    | 0.45      | 0.85 | 0.84    | 0.55   | 0.16    | 0.53      | 0.90 | 0.87    | 0.59   | 0.14    | 0.50      | 0.97 | 0.88    |
| Anaerofilum                   | 0.70   | 0.16    | 0.38      | 0.47 | 0.80    | 0.37   | 0.45    | 0.45      | 0.82 | 0.82    | 0.34   | 0.52    | 0.49      | 0.91 | 0.87    | 0.32   | 0.55    | 0.49      | 0.92 | 0.86    | 0.25   | 0.64    | 0.56      | 0.97 | 0.88    |
| Anaerostipes                  | -0.01  | 0.99    | 0.79      | 0.99 | 0.90    | -0.16  | 0.72    | 0.85      | 0.93 | 0.94    | -0.22  | 0.64    | 0.92      | 0.93 | 0.99    | -0.19  | 0.68    | 0.85      | 0.96 | 0.95    | -0.19  | 0.70    | 0.84      | 0.97 | 0.96    |
| Anaerotruncus                 | 0.43   | 0.31    | 0.15      | 0.65 | 0.68    | 0.32   | 0.43    | 0.16      | 0.82 | 0.75    | 0.33   | 0.45    | 0.16      | 0.91 | 0.81    | 0.29   | 0.51    | 0.15      | 0.92 | 0.80    | 0.32   | 0.47    | 0.12      | 0.97 | 0.75    |
| Bacteroides                   | 0.24   | 0.70    | 0.26      | 0.89 | 0.68    | 0.10   | 0.86    | 0.27      | 0.94 | 0.77    | 0.07   | 0.91    | 0.31      | 0.96 | 0.81    | 0.15   | 0.81    | 0.28      | 0.96 | 0.83    | 0.17   | 0.78    | 0.26      | 0.98 | 0.87    |
| Barnesiella                   | 0.48   | 0.02    | 0.74      | 0.29 | 0.90    | 0.51   | 0.01    | 0.86      | 0.36 | 0.94    | 0.57   | 0.01    | 0.98      | 0.65 | 1.00    | 0.56   | 0.01    | 0.94      | 0.73 | 0.99    | 0.55   | 0.02    | 0.86      | 0.84 | 0.96    |
| Bifidobacterium               | 0.41   | 0.15    | 0.02      | 0.47 | 0.46    | 0.51   | 0.06    | 0.03      | 0.47 | 0.59    | 0.42   | 0.15    | 0.10      | 0.85 | 0.81    | 0.45   | 0.12    | 0.08      | 0.90 | 0.80    | 0.46   | 0.12    | 0.08      | 0.97 | 0.75    |
| Bifilophila                   | 0.74   | 0.01    | 0.40      | 0.13 | 0.80    | 0.58   | 0.03    | 0.69      | 0.37 | 0.93    | 0.48   | 0.10    | 0.91      | 0.85 | 0.99    | 0.51   | 0.08    | 0.98      | 0.90 | 0.99    | 0.45   | 0.13    | 0.83      | 0.97 | 0.96    |
| Blautia                       | -0.76  | 0.40    | 0.65      | 0.70 | 0.86    | -0.93  | 0.29    | 0.71      | 0.75 | 0.93    | -1.02  | 0.27    | 0.55      | 0.90 | 0.89    | -0.97  | 0.30    | 0.63      | 0.90 | 0.93    | -0.99  | 0.32    | 0.63      | 0.97 | 0.88    |
| Butyrivococcus                | 0.70   | 0.26    | 0.72      | 0.59 | 0.90    | 0.24   | 0.69    | 0.90      | 0.93 | 0.96    | 0.42   | 0.52    | 0.51      | 0.91 | 0.87    | 0.46   | 0.48    | 0.48      | 0.92 | 0.86    | 0.42   | 0.52    | 0.51      | 0.97 | 0.88    |
| Butyrivimonas                 | 0.72   | 0.00    | 0.03      | 0.12 | 0.46    | 0.66   | 0.00    | 0.03      | 0.36 | 0.55    | 0.74   | 0.00    | 0.02      | 0.25 | 0.62    | 0.73   | 0.00    | 0.02      | 0.27 | 0.65    | 0.76   | 0.00    | 0.02      | 0.21 | 0.68    |
| CAG.56                        | 0.00   | 0.99    | 0.26      | 0.99 | 0.68    | -0.02  | 0.95    | 0.40      | 0.98 | 0.80    | -0.04  | 0.90    | 0.54      | 0.96 | 0.89    | -0.02  | 0.94    | 0.59      | 0.97 | 0.92    | -0.02  | 0.94    | 0.57      | 0.98 | 0.88    |
| Candidatus_Soleaferrea        | 0.22   | 0.70    | 0.57      | 0.89 | 0.86    | 0.14   | 0.80    | 0.49      | 0.94 | 0.83    | 0.09   | 0.88    | 0.57      | 0.96 | 0.91    | 0.09   | 0.88    | 0.65      | 0.96 | 0.93    | 0.12   | 0.84    | 0.56      | 0.98 | 0.88    |
| Caproiciproducens             | -0.27  | 0.57    | 0.55      | 0.86 | 0.84    | -0.35  | 0.45    | 0.70      | 0.82 | 0.93    | -0.33  | 0.52    | 0.68      | 0.91 | 0.91    | -0.34  | 0.50    | 0.68      | 0.92 | 0.93    | -0.42  | 0.41    | 0.75      | 0.97 | 0.91    |
| Christensenellaceae_R.7_group | 0.60   | 0.01    | 0.13      | 0.17 | 0.68    | 0.44   | 0.06    | 0.23      | 0.47 | 0.77    | 0.36   | 0.15    | 0.34      | 0.85 | 0.81    | 0.34   | 0.19    | 0.37      | 0.90 | 0.83    | 0.32   | 0.22    | 0.40      | 0.97 | 0.88    |
| Clostridium_sensu_stricto_1   | -0.21  | 0.52    | 0.26      | 0.80 | 0.68    | -0.13  | 0.68    | 0.32      | 0.93 | 0.78    | -0.16  | 0.64    | 0.32      | 0.93 | 0.81    | -0.14  | 0.67    | 0.35      | 0.96 | 0.83    | -0.18  | 0.59    | 0.30      | 0.97 | 0.87    |
| Colidextribacter              | -0.13  | 0.80    | 0.84      | 0.92 | 0.93    | -0.17  | 0.75    | 0.94      | 0.93 | 0.96    | -0.11  | 0.84    | 0.77      | 0.96 | 0.91    | -0.10  | 0.86    | 0.70      | 0.96 | 0.93    | -0.05  | 0.93    | 0.70      | 0.98 | 0.91    |
| Collinsella                   | 0.30   | 0.24    | 0.81      | 0.56 | 0.91    | 0.51   | 0.04    | 0.66      | 0.37 | 0.93    | 0.44   | 0.09    | 0.95      | 0.85 | 1.00    | 0.44   | 0.09    | 0.99      | 0.90 | 0.99    | 0.41   | 0.12    | 0.93      | 0.97 | 0.97    |
| Coprobacter                   | 0.50   | 0.11    | 0.46      | 0.45 | 0.82    | 0.43   | 0.15    | 0.41      | 0.63 | 0.80    | 0.41   | 0.21    | 0.30      | 0.85 | 0.81    | 0.39   | 0.23    | 0.32      | 0.90 | 0.83    | 0.34   | 0.30    | 0.39      | 0.97 | 0.88    |
| Coprococcus                   | 0.10   | 0.74    | 0.88      | 0.91 | 0.94    | 0.18   | 0.55    | 0.78      | 0.89 | 0.93    | 0.22   | 0.48    | 0.58      | 0.91 | 0.89    | 0.22   | 0.48    | 0.57      | 0.92 | 0.92    | 0.26   | 0.41    | 0.53      | 0.97 | 0.88    |
| Defluviitaleaceae_UCG.011     | 0.38   | 0.40    | 0.90      | 0.70 | 0.94    | 0.26   | 0.57    | 0.83      | 0.89 | 0.94    | 0.41   | 0.39    | 0.92      | 0.91 | 0.99    | 0.38   | 0.43    | 0.93      | 0.92 | 0.99    | 0.34   | 0.49    | 0.95      | 0.97 | 0.97    |
| Desulfovibrio                 | 0.31   | 0.20    | 0.01      | 0.51 | 0.30    | 0.33   | 0.15    | 0.00      | 0.63 | 0.43    | 0.25   | 0.33    | 0.02      | 0.90 | 0.62    | 0.21   | 0.41    | 0.02      | 0.92 | 0.65    | 0.19   | 0.45    | 0.02      | 0.97 | 0.68    |
| Dialister                     | -0.27  | 0.17    | 0.15      | 0.47 | 0.68    | -0.24  | 0.21    | 0.19      | 0.73 | 0.75    | -0.21  | 0.31    | 0.26      | 0.90 | 0.81    | -0.21  | 0.32    | 0.25      | 0.90 | 0.83    | -0.18  | 0.40    | 0.29      | 0.97 | 0.87    |
| DNF00809                      | 0.14   | 0.78    | 0.36      | 0.92 | 0.80    | 0.12   | 0.81    | 0.28      | 0.94 | 0.77    | 0.31   | 0.56    | 0.15      | 0.91 | 0.81    | 0.29   | 0.58    | 0.15      | 0.92 | 0.80    | 0.25   | 0.64    | 0.17      | 0.97 | 0.75    |
| Dorea                         | 0.05   | 0.88    | 0.64      | 0.96 | 0.86    | 0.06   | 0.85    | 0.75      | 0.94 | 0.93    | 0.05   | 0.88    | 0.68      | 0.96 | 0.91    | 0.06   | 0.86    | 0.69      | 0.96 | 0.93    | 0.04   | 0.92    | 0.73      | 0.98 | 0.91    |
| DTU089                        | -0.17  | 0.68    | 0.40      | 0.89 | 0.80    | -0.32  | 0.40    | 0.63      | 0.82 | 0.93    | -0.39  | 0.34    | 0.76      | 0.91 | 0.91    | -0.40  | 0.34    | 0.70      | 0.90 | 0.93    | -0.31  | 0.45    | 0.60      | 0.97 | 0.88    |
| Eggerthella                   | -0.82  | 0.03    | 0.10      | 0.29 | 0.68    | -0.94  | 0.01    | 0.05      | 0.36 | 0.71    | -0.86  | 0.03    | 0.09      | 0.76 | 0.81    | -0.84  | 0.03    | 0.11      | 0.89 | 0.80    | -0.82  | 0.04    | 0.11      | 0.87 | 0.75    |
| Eisenbergiella                | 0.00   | 0.99    | 0.19      | 0.99 | 0.68    | -0.01  | 0.98    | 0.20      | 0.99 | 0.75    | -0.07  | 0.85    | 0.30      | 0.96 | 0.81    | -0.10  | 0.79    | 0.26      | 0.96 | 0.83    | -0.07  | 0.85    | 0.25      | 0.98 | 0.87    |
| Erysipelatoclostridium        | -0.11  | 0.77    | 0.20      | 0.92 | 0.68    | -0.15  | 0.68    | 0.27      | 0.93 | 0.77    | -0.23  | 0.58    | 0.57      | 0.91 | 0.89    | -0.24  | 0.55    | 0.53      | 0.92 | 0.87    | -0.21  | 0.61    | 0.47      | 0.97 | 0.88    |
| Erysipelotrichaceae_UCG.003   | -0.06  | 0.83    | 0.29      | 0.93 | 0.72    | -0.07  | 0.81    | 0.33      | 0.94 | 0.78    | -0.09  | 0.78    | 0.34      | 0.96 | 0.81    | -0.10  | 0.75    | 0.33      | 0.96 | 0.83    | -0.13  | 0.68    | 0.31      | 0.97 | 0.87    |
| Escherichia_Shigella          | -0.28  | 0.29    | 0.91      | 0.64 | 0.94    | -0.10  | 0.70    | 0.75      | 0.93 | 0.93    | -0.16  | 0.58    | 0.77      | 0.91 | 0.91    | -0.14  | 0.62    | 0.79      | 0.96 | 0.94    | -0.12  | 0.67    | 0.86      | 0.97 | 0.96    |
| Faecalibacterium              | 0.48   | 0.33    | 0.46      | 0.69 | 0.82    | 0.20   | 0.68    | 0.75      | 0.93 | 0.93    | 0.05   | 0.92    | 0.99      | 0.96 | 1.00    | 0.08   | 0.88    | 0.96      | 0.96 | 0.99    | 0.09   | 0.85    | 0.93      | 0.98 | 0.97    |
| Family_XIII_AD3011_group      | 0.70   | 0.06    | 0.08      | 0.40 | 0.68    | 0.47   | 0.20    | 0.11      | 0.73 | 0.75    | 0.53   | 0.19    | 0.05      | 0.85 | 0.81    | 0.49   | 0.23    | 0.06      | 0.90 | 0.80    | 0.42   | 0.30    | 0.07      | 0.97 | 0.75    |
| Family_XIII_UCG.001           | 0.75   | 0.10    | 0.52      | 0.44 | 0.84    | 0.65   | 0.14    | 0.46      | 0.63 | 0.83    | 0.63   | 0.19    | 0.42      | 0.85 | 0.83    | 0.59   | 0.23    | 0.43      | 0.90 | 0.85    | 0.53   | 0.28    | 0.48      | 0.97 | 0.88    |
| FD2005                        | -0.71  | 0.09    | 0.09      | 0.44 | 0.68    | -0.44  | 0.28    | 0.28      | 0.74 | 0.77    | -0.40  | 0.36    | 0.35      | 0.91 | 0.81    | -0.41  | 0.35    | 0.32      | 0.91 | 0.83    | -0.37  | 0.41    | 0.38      | 0.97 | 0.87    |
| Flavonifractor                | -0.26  | 0.47    | 0.62      | 0.77 | 0.86    | -0.31  | 0.38    | 0.79      | 0.81 | 0.93    | -0.32  | 0.42    | 1.00      | 0.91 | 1.00    | -0.29  | 0.45    | 0.94      | 0.92 | 0.99    | -0.25  | 0.52    | 0.88      | 0.97 | 0.97    |
| Fournierella                  | -0.02  | 0.96    | 0.77      | 0.99 | 0.90    | -0.13  | 0.77    | 0.93      | 0.93 | 0.96    | -0.06  | 0.89    | 0.66      | 0.96 | 0.91    | -0.11  | 0.81    | 0.70      | 0.96 | 0.93    | -0.05  | 0.91    | 0.62      | 0.98 | 0.88    |
| Frisingicoccus                | 0.31   | 0.36    | 0.51      | 0.69 | 0.84    | 0.20   | 0.53    | 0.62      | 0.89 | 0.93    | 0.13   | 0.72    | 0.69      | 0.96 | 0.91    | 0.11   | 0.74    | 0.68      | 0.96 | 0.93    | 0.10   | 0.77    | 0.71      | 0.98 | 0.91    |
| Fusicatenibacter              | 0.07   | 0.80    | 0.16      | 0.92 | 0.68    | 0.00   | 1.00    | 0.17      | 1.00 | 0.75    | -0.16  | 0.62    | 0.12      | 0.93 | 0.81    | -0.12  | 0.70    | 0.13      | 0.96 | 0.80    | -0.23  | 0.47    | 0.08      | 0.97 | 0.75    |
| Fusobacterium                 | -0.06  | 0.87    | 0.46      | 0.96 | 0.82    | 0.10   | 0.78    | 0.33      | 0.93 | 0.78    | 0.17   | 0.64    | 0.72      | 0.93 | 0.91    | 0.15   | 0.69    | 0.72      | 0.96 | 0.93    | 0.21   | 0.58    | 0.55      | 0.97 | 0.88    |
| GCA.900066575                 | 0.83   | 0.05    | 0.11      | 0.35 | 0.68    | 0.64   | 0.12    | 0.10      | 0.63 | 0.75    | 0.57   | 0.20    | 0.19      | 0.85 | 0.81    | 0.53   | 0.23    | 0.19      | 0.90 | 0.80    | 0.56   | 0.21    | 0.13      | 0.97 | 0.75    |
| Gordonibacter                 | 0.17   | 0.72    | 0.91      | 0.89 | 0.94    | -0.13  | 0.77    | 0.49      | 0.93 | 0.83    | 0.08   | 0.86    | 0.75      | 0.96 | 0.91    | 0.05   | 0.92    | 0.76      | 0.96 | 0.94    | -0.03  | 0.96    | 0.65      | 0.98 | 0.88    |
| Granulicatella                | -0.44  | 0.38    | 0.23      | 0.69 | 0.68    | -0.31  | 0.52    | 0.36      | 0.89 | 0.80    | -0.36  | 0.49    | 0.27      | 0.91 | 0.81    | -0.32  | 0.55    | 0.31      | 0.92 | 0.83    | -0.21  | 0.69    | 0.36      | 0.97 | 0.87</  |

|                       |       |      |      |      |      |       |      |      |      |      |       |      |      |      |      |       |      |      |      |      |       |      |      |      |      |
|-----------------------|-------|------|------|------|------|-------|------|------|------|------|-------|------|------|------|------|-------|------|------|------|------|-------|------|------|------|------|
| Monoglobus            | 0.37  | 0.26 | 0.40 | 0.59 | 0.80 | 0.21  | 0.51 | 0.25 | 0.88 | 0.77 | 0.04  | 0.90 | 0.18 | 0.96 | 0.81 | 0.04  | 0.91 | 0.19 | 0.96 | 0.80 | -0.03 | 0.93 | 0.12 | 0.98 | 0.75 |
| Moryella              | 0.27  | 0.59 | 0.41 | 0.87 | 0.80 | 0.08  | 0.87 | 0.39 | 0.94 | 0.80 | -0.06 | 0.91 | 0.40 | 0.96 | 0.81 | -0.07 | 0.90 | 0.39 | 0.96 | 0.83 | -0.10 | 0.86 | 0.36 | 0.98 | 0.87 |
| Negativibacillus      | -0.01 | 0.98 | 0.69 | 0.99 | 0.88 | 0.08  | 0.80 | 0.50 | 0.94 | 0.83 | 0.09  | 0.78 | 0.46 | 0.96 | 0.84 | 0.07  | 0.82 | 0.50 | 0.96 | 0.86 | 0.04  | 0.90 | 0.53 | 0.98 | 0.88 |
| NK4A214_group         | 0.52  | 0.04 | 0.10 | 0.29 | 0.68 | 0.42  | 0.08 | 0.09 | 0.49 | 0.75 | 0.33  | 0.20 | 0.11 | 0.85 | 0.81 | 0.31  | 0.24 | 0.13 | 0.90 | 0.80 | 0.29  | 0.27 | 0.15 | 0.97 | 0.75 |
| Odoribacter           | 0.61  | 0.01 | 0.07 | 0.13 | 0.68 | 0.47  | 0.03 | 0.19 | 0.37 | 0.75 | 0.34  | 0.14 | 0.33 | 0.85 | 0.81 | 0.34  | 0.15 | 0.34 | 0.90 | 0.83 | 0.33  | 0.17 | 0.33 | 0.97 | 0.87 |
| Oscillibacter         | 0.22  | 0.58 | 0.93 | 0.86 | 0.94 | 0.18  | 0.64 | 0.92 | 0.93 | 0.96 | 0.50  | 0.24 | 0.38 | 0.90 | 0.81 | 0.46  | 0.28 | 0.39 | 0.90 | 0.83 | 0.41  | 0.35 | 0.44 | 0.97 | 0.88 |
| Oscillospira          | -0.49 | 0.34 | 0.61 | 0.69 | 0.86 | -0.57 | 0.26 | 0.42 | 0.74 | 0.80 | -0.54 | 0.31 | 0.40 | 0.90 | 0.81 | -0.53 | 0.32 | 0.44 | 0.90 | 0.85 | -0.50 | 0.36 | 0.45 | 0.97 | 0.88 |
| Oxalobacter           | 0.62  | 0.13 | 0.78 | 0.46 | 0.90 | 0.40  | 0.32 | 0.69 | 0.77 | 0.93 | 0.35  | 0.42 | 0.71 | 0.91 | 0.91 | 0.34  | 0.44 | 0.74 | 0.92 | 0.93 | 0.25  | 0.58 | 0.89 | 0.97 | 0.97 |
| Paludicola            | 0.32  | 0.46 | 0.33 | 0.76 | 0.78 | 0.17  | 0.70 | 0.24 | 0.93 | 0.77 | -0.01 | 0.98 | 0.36 | 0.98 | 0.81 | -0.08 | 0.86 | 0.36 | 0.96 | 0.83 | -0.17 | 0.72 | 0.48 | 0.97 | 0.88 |
| Parabacteroides       | 0.47  | 0.12 | 0.43 | 0.46 | 0.81 | 0.47  | 0.11 | 0.73 | 0.63 | 0.93 | 0.34  | 0.27 | 0.85 | 0.90 | 0.97 | 0.37  | 0.23 | 0.91 | 0.90 | 0.99 | 0.40  | 0.20 | 0.96 | 0.97 | 0.97 |
| Paraprevotella        | 0.02  | 0.93 | 0.58 | 0.99 | 0.86 | 0.05  | 0.82 | 0.68 | 0.94 | 0.93 | 0.04  | 0.84 | 0.67 | 0.96 | 0.91 | 0.03  | 0.90 | 0.69 | 0.96 | 0.93 | 0.05  | 0.84 | 0.65 | 0.98 | 0.88 |
| Parasutterella        | 0.31  | 0.16 | 0.67 | 0.47 | 0.87 | 0.25  | 0.25 | 0.54 | 0.74 | 0.87 | 0.13  | 0.57 | 0.39 | 0.91 | 0.81 | 0.14  | 0.55 | 0.39 | 0.92 | 0.83 | 0.09  | 0.71 | 0.34 | 0.97 | 0.87 |
| Peptococcus           | 0.68  | 0.13 | 0.14 | 0.46 | 0.68 | 0.45  | 0.31 | 0.18 | 0.77 | 0.75 | 0.30  | 0.53 | 0.25 | 0.91 | 0.81 | 0.27  | 0.57 | 0.25 | 0.92 | 0.83 | 0.22  | 0.66 | 0.33 | 0.97 | 0.87 |
| Phascolarctobacterium | 0.48  | 0.02 | 0.07 | 0.25 | 0.68 | 0.48  | 0.02 | 0.09 | 0.36 | 0.75 | 0.47  | 0.03 | 0.18 | 0.76 | 0.81 | 0.46  | 0.04 | 0.18 | 0.89 | 0.80 | 0.45  | 0.04 | 0.18 | 0.87 | 0.75 |
| Phocaea               | -0.46 | 0.35 | 0.67 | 0.69 | 0.87 | -0.60 | 0.21 | 0.79 | 0.73 | 0.93 | -0.79 | 0.12 | 0.96 | 0.85 | 1.00 | -0.76 | 0.14 | 0.98 | 0.90 | 0.99 | -0.68 | 0.19 | 0.91 | 0.97 | 0.97 |
| Prevotella            | 0.13  | 0.48 | 0.55 | 0.77 | 0.84 | 0.17  | 0.33 | 0.75 | 0.78 | 0.93 | 0.17  | 0.38 | 0.75 | 0.91 | 0.91 | 0.15  | 0.42 | 0.84 | 0.92 | 0.95 | 0.17  | 0.38 | 0.77 | 0.97 | 0.92 |
| Romboutsia            | -0.05 | 0.89 | 0.26 | 0.96 | 0.68 | 0.04  | 0.92 | 0.26 | 0.96 | 0.77 | -0.03 | 0.93 | 0.32 | 0.96 | 0.81 | 0.01  | 0.98 | 0.37 | 0.99 | 0.83 | 0.01  | 0.98 | 0.37 | 1.00 | 0.87 |
| Roseburia             | 0.17  | 0.63 | 0.40 | 0.89 | 0.80 | 0.12  | 0.73 | 0.41 | 0.93 | 0.80 | -0.15 | 0.70 | 0.24 | 0.96 | 0.81 | -0.14 | 0.72 | 0.24 | 0.96 | 0.83 | -0.07 | 0.86 | 0.29 | 0.98 | 0.87 |
| Ruminococcus          | 0.52  | 0.03 | 0.55 | 0.29 | 0.84 | 0.38  | 0.11 | 0.62 | 0.63 | 0.93 | 0.27  | 0.30 | 0.71 | 0.90 | 0.91 | 0.26  | 0.32 | 0.73 | 0.90 | 0.93 | 0.22  | 0.41 | 0.84 | 0.97 | 0.96 |
| Sellimonas            | -0.09 | 0.81 | 0.11 | 0.92 | 0.68 | -0.14 | 0.70 | 0.13 | 0.93 | 0.75 | -0.21 | 0.57 | 0.12 | 0.91 | 0.81 | -0.26 | 0.49 | 0.10 | 0.92 | 0.80 | -0.29 | 0.44 | 0.08 | 0.97 | 0.75 |
| Senegalimassilia      | 0.56  | 0.07 | 0.17 | 0.43 | 0.68 | 0.65  | 0.03 | 0.08 | 0.37 | 0.75 | 0.66  | 0.04 | 0.10 | 0.76 | 0.81 | 0.64  | 0.05 | 0.12 | 0.89 | 0.80 | 0.65  | 0.05 | 0.11 | 0.87 | 0.75 |
| Shuttleworthia        | 0.55  | 0.20 | 0.25 | 0.51 | 0.68 | 0.22  | 0.60 | 0.33 | 0.93 | 0.78 | 0.38  | 0.40 | 0.12 | 0.91 | 0.81 | 0.35  | 0.44 | 0.13 | 0.92 | 0.80 | 0.31  | 0.50 | 0.18 | 0.97 | 0.75 |
| Slackia               | 0.40  | 0.16 | 0.01 | 0.47 | 0.31 | 0.40  | 0.15 | 0.02 | 0.63 | 0.49 | 0.42  | 0.16 | 0.03 | 0.85 | 0.62 | 0.42  | 0.16 | 0.03 | 0.90 | 0.67 | 0.38  | 0.21 | 0.03 | 0.97 | 0.71 |
| Streptococcus         | 0.26  | 0.54 | 0.91 | 0.83 | 0.94 | 0.20  | 0.63 | 0.96 | 0.93 | 0.97 | 0.17  | 0.70 | 0.66 | 0.96 | 0.91 | 0.21  | 0.64 | 0.78 | 0.96 | 0.94 | 0.21  | 0.65 | 0.73 | 0.97 | 0.91 |
| Subdoligranulum       | 0.70  | 0.03 | 0.72 | 0.29 | 0.90 | 0.62  | 0.06 | 0.75 | 0.47 | 0.93 | 0.51  | 0.14 | 0.85 | 0.85 | 0.97 | 0.50  | 0.15 | 0.84 | 0.90 | 0.95 | 0.54  | 0.12 | 0.92 | 0.97 | 0.97 |
| Sutterella            | -0.15 | 0.45 | 0.60 | 0.76 | 0.86 | -0.04 | 0.84 | 0.64 | 0.94 | 0.93 | -0.08 | 0.69 | 0.50 | 0.96 | 0.87 | -0.08 | 0.69 | 0.50 | 0.96 | 0.86 | -0.06 | 0.78 | 0.54 | 0.98 | 0.88 |
| TM7x                  | -0.77 | 0.09 | 0.07 | 0.44 | 0.68 | -0.81 | 0.07 | 0.12 | 0.47 | 0.75 | -0.64 | 0.18 | 0.23 | 0.85 | 0.81 | -0.62 | 0.19 | 0.25 | 0.90 | 0.83 | -0.67 | 0.17 | 0.19 | 0.97 | 0.75 |
| Turicibacter          | 0.21  | 0.67 | 0.43 | 0.89 | 0.81 | 0.39  | 0.42 | 0.48 | 0.82 | 0.83 | 0.54  | 0.32 | 0.68 | 0.90 | 0.91 | 0.58  | 0.29 | 0.73 | 0.90 | 0.93 | 0.55  | 0.31 | 0.74 | 0.97 | 0.91 |
| Tuzzerella            | 0.24  | 0.50 | 0.76 | 0.79 | 0.90 | 0.23  | 0.50 | 0.92 | 0.88 | 0.96 | 0.08  | 0.84 | 0.82 | 0.96 | 0.95 | 0.07  | 0.86 | 0.81 | 0.96 | 0.95 | 0.03  | 0.93 | 0.74 | 0.98 | 0.91 |
| UBA1819               | 0.20  | 0.65 | 0.14 | 0.89 | 0.68 | 0.12  | 0.77 | 0.16 | 0.93 | 0.75 | 0.17  | 0.71 | 0.21 | 0.96 | 0.81 | 0.13  | 0.79 | 0.19 | 0.96 | 0.80 | 0.14  | 0.77 | 0.19 | 0.98 | 0.75 |
| UCG_002               | 0.38  | 0.10 | 0.15 | 0.44 | 0.68 | 0.25  | 0.27 | 0.18 | 0.74 | 0.75 | 0.19  | 0.43 | 0.18 | 0.91 | 0.81 | 0.17  | 0.49 | 0.19 | 0.92 | 0.80 | 0.19  | 0.45 | 0.16 | 0.97 | 0.75 |
| UCG_003               | 0.53  | 0.05 | 0.27 | 0.35 | 0.68 | 0.46  | 0.08 | 0.15 | 0.49 | 0.75 | 0.39  | 0.17 | 0.18 | 0.85 | 0.81 | 0.38  | 0.18 | 0.19 | 0.90 | 0.80 | 0.34  | 0.24 | 0.23 | 0.97 | 0.86 |
| UCG_005               | 0.81  | 0.00 | 0.03 | 0.12 | 0.46 | 0.64  | 0.02 | 0.05 | 0.36 | 0.72 | 0.57  | 0.06 | 0.06 | 0.85 | 0.81 | 0.54  | 0.07 | 0.06 | 0.90 | 0.80 | 0.52  | 0.09 | 0.07 | 0.97 | 0.75 |
| UCG_009               | 0.21  | 0.64 | 0.54 | 0.89 | 0.84 | -0.04 | 0.93 | 0.57 | 0.97 | 0.90 | -0.13 | 0.78 | 0.58 | 0.96 | 0.89 | -0.11 | 0.82 | 0.52 | 0.96 | 0.87 | -0.12 | 0.80 | 0.51 | 0.98 | 0.88 |
| Veillonella           | 0.02  | 0.95 | 0.64 | 0.99 | 0.86 | 0.06  | 0.85 | 0.79 | 0.94 | 0.93 | 0.01  | 0.98 | 0.77 | 0.98 | 0.91 | 0.04  | 0.90 | 0.84 | 0.96 | 0.95 | 0.09  | 0.80 | 0.90 | 0.98 | 0.97 |
| Victivallis           | -0.03 | 0.93 | 0.25 | 0.99 | 0.68 | -0.10 | 0.76 | 0.33 | 0.93 | 0.78 | -0.29 | 0.41 | 0.28 | 0.91 | 0.81 | -0.30 | 0.39 | 0.28 | 0.92 | 0.83 | -0.35 | 0.33 | 0.20 | 0.97 | 0.76 |

Multivariable-adjusted regression models adjusted for:

Model 1: sequencing batch, age, race, gender, study center

Model 2: Model 1, with education

Model 3: Model 2, with physical activity, diet score, medication use, and smoking

Model 4: Model 3 with BMI

Model 5: Model 4 with hypertension and diabetes

eTable 23: Multivariable-adjusted regression coefficients, p-values, race interaction p-values, false discovery rate (FDR)-adjusted p-values for race-genera interactions with respect to letter fluency.

|                               | Model1 |         |           |      |         | Model2 |         |           |      |         | Model3 |         |           |      |         | Model4 |         |           |      |         | Model5 |         |           |      |         |
|-------------------------------|--------|---------|-----------|------|---------|--------|---------|-----------|------|---------|--------|---------|-----------|------|---------|--------|---------|-----------|------|---------|--------|---------|-----------|------|---------|
|                               | beta   | p-value | p-val int | FDR  | FDR-int | beta   | p-value | p-val int | FDR  | FDR-int | beta   | p-value | p-val int | FDR  | FDR-int | beta   | p-value | p-val int | FDR  | FDR-int | beta   | p-value | p-val int | FDR  | FDR-int |
| Acetanaerobacterium           | 0.36   | 0.82    | 0.97      | 0.94 | 0.99    | 0.33   | 0.83    | 0.68      | 0.98 | 0.90    | 0.35   | 0.83    | 0.68      | 1.00 | 0.97    | 0.34   | 0.84    | 0.69      | 0.99 | 0.99    | 0.50   | 0.76    | 0.66      | 0.98 | 1.00    |
| Acidaminococcus               | -0.28  | 0.55    | 0.17      | 0.82 | 0.81    | -0.10  | 0.83    | 0.24      | 0.98 | 0.90    | -0.01  | 0.98    | 0.40      | 1.00 | 0.89    | 0.00   | 1.00    | 0.40      | 1.00 | 0.89    | 0.00   | 0.99    | 0.41      | 1.00 | 0.89    |
| Actionomyces                  | 0.07   | 0.95    | 0.84      | 0.98 | 0.96    | 0.38   | 0.75    | 0.73      | 0.98 | 0.90    | 0.94   | 0.47    | 0.75      | 0.93 | 1.00    | 0.94   | 0.47    | 0.75      | 0.96 | 1.00    | 0.90   | 0.50    | 0.88      | 1.00 | 1.00    |
| Adiercreutzia                 | 0.00   | 1.00    | 0.25      | 1.00 | 0.82    | -0.30  | 0.71    | 0.40      | 0.98 | 0.90    | 0.00   | 1.00    | 0.17      | 1.00 | 0.89    | 0.00   | 1.00    | 0.17      | 1.00 | 0.86    | -0.02  | 0.99    | 0.16      | 1.00 | 0.89    |
| Agathobacter                  | 0.41   | 0.71    | 0.77      | 0.88 | 0.93    | 0.32   | 0.77    | 0.79      | 0.98 | 0.90    | -0.27  | 0.81    | 0.97      | 1.00 | 1.00    | -0.24  | 0.84    | 0.96      | 0.99 | 1.00    | -0.12  | 0.91    | 0.99      | 1.00 | 1.00    |
| Akermansia                    | 0.70   | 0.20    | 0.11      | 0.59 | 0.81    | 0.38   | 0.48    | 0.19      | 0.93 | 0.90    | 0.30   | 0.60    | 0.22      | 1.00 | 0.89    | 0.31   | 0.59    | 0.21      | 0.96 | 0.86    | 0.19   | 0.75    | 0.29      | 0.98 | 0.89    |
| Alistipes                     | 0.82   | 0.38    | 0.99      | 0.76 | 0.99    | 0.44   | 0.63    | 0.82      | 0.98 | 0.92    | 0.07   | 0.94    | 0.87      | 1.00 | 1.00    | 0.10   | 0.92    | 0.90      | 0.99 | 1.00    | 0.08   | 0.93    | 0.94      | 1.00 | 1.00    |
| Allisonella                   | -0.16  | 0.85    | 0.63      | 0.94 | 0.92    | 0.74   | 0.39    | 0.84      | 0.87 | 0.92    | 0.87   | 0.36    | 0.81      | 0.93 | 1.00    | 0.85   | 0.38    | 0.75      | 0.96 | 1.00    | 0.91   | 0.35    | 0.75      | 0.98 | 1.00    |
| Anaerofilum                   | 1.52   | 0.22    | 0.41      | 0.59 | 0.86    | 0.78   | 0.52    | 0.47      | 0.93 | 0.90    | 1.10   | 0.39    | 0.28      | 0.93 | 0.89    | 1.07   | 0.41    | 0.28      | 0.96 | 0.86    | 0.90   | 0.49    | 0.33      | 0.98 | 0.89    |
| Anaerostipes                  | -1.03  | 0.36    | 0.48      | 0.76 | 0.88    | -1.38  | 0.21    | 0.42      | 0.78 | 0.90    | -0.89  | 0.44    | 0.60      | 0.93 | 0.94    | -0.86  | 0.46    | 0.63      | 0.96 | 0.96    | -0.77  | 0.52    | 0.64      | 0.98 | 0.98    |
| Anaerotruncus                 | 0.75   | 0.47    | 0.20      | 0.78 | 0.81    | 0.48   | 0.63    | 0.22      | 0.98 | 0.90    | 0.93   | 0.39    | 0.09      | 0.93 | 0.89    | 0.87   | 0.41    | 0.08      | 0.96 | 0.86    | 0.87   | 0.42    | 0.08      | 0.98 | 0.89    |
| Bacteroides                   | 1.32   | 0.39    | 0.17      | 0.76 | 0.81    | 0.98   | 0.51    | 0.18      | 0.93 | 0.90    | 0.76   | 0.61    | 0.25      | 1.00 | 0.89    | 0.87   | 0.57    | 0.24      | 0.96 | 0.86    | 0.92   | 0.55    | 0.20      | 0.98 | 0.89    |
| Barnesiella                   | 1.16   | 0.03    | 0.75      | 0.42 | 0.93    | 1.24   | 0.02    | 0.61      | 0.72 | 0.90    | 0.96   | 0.09    | 0.92      | 0.93 | 1.00    | 0.94   | 0.09    | 0.93      | 0.96 | 1.00    | 0.93   | 0.10    | 1.00      | 0.98 | 1.00    |
| Bifidobacterium               | 0.71   | 0.31    | 0.15      | 0.71 | 0.81    | 0.98   | 0.15    | 0.17      | 0.74 | 0.90    | 0.83   | 0.25    | 0.24      | 0.93 | 0.89    | 0.87   | 0.23    | 0.22      | 0.96 | 0.86    | 0.89   | 0.22    | 0.21      | 0.98 | 0.89    |
| Blifiphila                    | 1.10   | 0.11    | 0.90      | 0.59 | 0.98    | 0.68   | 0.31    | 0.71      | 0.87 | 0.90    | 0.57   | 0.43    | 0.61      | 0.93 | 0.94    | 0.61   | 0.40    | 0.65      | 0.96 | 0.96    | 0.48   | 0.51    | 0.58      | 0.98 | 0.94    |
| Blautia                       | 0.04   | 0.99    | 0.19      | 1.00 | 0.81    | -0.42  | 0.85    | 0.16      | 0.98 | 0.90    | 0.23   | 0.92    | 0.13      | 1.00 | 0.89    | 0.32   | 0.89    | 0.11      | 0.99 | 0.86    | 0.86   | 0.72    | 0.11      | 0.98 | 0.89    |
| Butyrivococcus                | 2.12   | 0.16    | 0.07      | 0.59 | 0.81    | 1.04   | 0.49    | 0.11      | 0.93 | 0.90    | 0.98   | 0.53    | 0.05      | 0.99 | 0.89    | 1.04   | 0.50    | 0.05      | 0.96 | 0.86    | 0.96   | 0.54    | 0.06      | 0.98 | 0.83    |
| Butyricimonas                 | 1.13   | 0.05    | 0.14      | 0.44 | 0.81    | 1.01   | 0.08    | 0.12      | 0.72 | 0.90    | 1.15   | 0.05    | 0.06      | 0.93 | 0.89    | 1.14   | 0.05    | 0.06      | 0.96 | 0.86    | 1.20   | 0.04    | 0.04      | 0.98 | 0.80    |
| CAG_56                        | 0.06   | 0.92    | 0.51      | 0.98 | 0.88    | 0.04   | 0.95    | 0.72      | 0.98 | 0.90    | 0.25   | 0.72    | 0.97      | 1.00 | 1.00    | 0.27   | 0.70    | 1.00      | 0.99 | 1.00    | 0.23   | 0.75    | 0.92      | 0.98 | 1.00    |
| Candidatus_Soleaferrea        | 0.74   | 0.60    | 0.34      | 0.86 | 0.86    | 0.50   | 0.71    | 0.30      | 0.98 | 0.90    | 0.53   | 0.71    | 0.42      | 1.00 | 0.89    | 0.54   | 0.71    | 0.41      | 0.99 | 0.89    | 0.69   | 0.63    | 0.31      | 0.98 | 0.89    |
| Caproiciproducens             | 1.80   | 0.13    | 0.14      | 0.59 | 0.81    | 1.64   | 0.15    | 0.19      | 0.74 | 0.90    | 0.89   | 0.47    | 0.40      | 0.93 | 0.89    | 0.87   | 0.48    | 0.40      | 0.96 | 0.89    | 0.73   | 0.56    | 0.45      | 0.98 | 0.89    |
| Christensenellaceae_R.7_group | 1.12   | 0.06    | 0.19      | 0.44 | 0.81    | 0.75   | 0.19    | 0.32      | 0.74 | 0.90    | 0.45   | 0.46    | 0.39      | 0.93 | 0.89    | 0.41   | 0.50    | 0.41      | 0.96 | 0.89    | 0.33   | 0.60    | 0.50      | 0.98 | 0.89    |
| Clostridium_sensu_stricto_1   | -0.91  | 0.25    | 0.07      | 0.61 | 0.81    | -0.70  | 0.36    | 0.09      | 0.87 | 0.90    | -0.75  | 0.36    | 0.10      | 0.93 | 0.89    | -0.73  | 0.37    | 0.10      | 0.96 | 0.86    | -0.80  | 0.33    | 0.11      | 0.98 | 0.89    |
| Collidextribacter             | 0.45   | 0.73    | 0.89      | 0.88 | 0.98    | 0.33   | 0.79    | 0.69      | 0.98 | 0.90    | 0.31   | 0.81    | 0.40      | 1.00 | 0.89    | 0.33   | 0.80    | 0.37      | 0.99 | 0.89    | 0.45   | 0.73    | 0.37      | 0.98 | 0.89    |
| Collinsella                   | -0.05  | 0.94    | 0.67      | 0.98 | 0.92    | 0.43   | 0.48    | 0.54      | 0.93 | 0.90    | 0.10   | 0.88    | 0.92      | 1.00 | 1.00    | 0.10   | 0.88    | 0.95      | 0.99 | 1.00    | -0.01  | 0.99    | 0.95      | 1.00 | 1.00    |
| Coprobacter                   | 1.14   | 0.15    | 0.70      | 0.59 | 0.92    | 0.92   | 0.23    | 0.72      | 0.83 | 0.90    | 0.47   | 0.57    | 0.88      | 1.00 | 1.00    | 0.44   | 0.59    | 0.89      | 0.96 | 1.00    | 0.39   | 0.64    | 0.97      | 0.98 | 1.00    |
| Coprococcus                   | 0.28   | 0.70    | 0.35      | 0.88 | 0.86    | 0.44   | 0.54    | 0.57      | 0.95 | 0.90    | 0.70   | 0.36    | 0.99      | 0.93 | 1.00    | 0.70   | 0.36    | 0.99      | 0.96 | 1.00    | 0.80   | 0.30    | 0.90      | 0.98 | 1.00    |
| Defluviitaleaceae_UCG.011     | 1.40   | 0.22    | 0.23      | 0.59 | 0.82    | 1.04   | 0.35    | 0.27      | 0.87 | 0.90    | 1.16   | 0.33    | 0.24      | 0.93 | 0.89    | 1.11   | 0.35    | 0.24      | 0.96 | 0.86    | 0.99   | 0.41    | 0.25      | 0.98 | 0.89    |
| Desulfovibrio                 | 0.34   | 0.56    | 0.20      | 0.84 | 0.81    | 0.41   | 0.48    | 0.19      | 0.93 | 0.90    | 0.45   | 0.46    | 0.14      | 0.93 | 0.89    | 0.41   | 0.51    | 0.15      | 0.96 | 0.86    | 0.40   | 0.52    | 0.16      | 0.98 | 0.89    |
| Dialister                     | -0.82  | 0.10    | 0.21      | 0.55 | 0.81    | -0.75  | 0.12    | 0.26      | 0.72 | 0.90    | -0.55  | 0.29    | 0.27      | 0.93 | 0.89    | -0.55  | 0.29    | 0.27      | 0.96 | 0.86    | -0.51  | 0.33    | 0.30      | 0.98 | 0.89    |
| DNF0809                       | -0.97  | 0.45    | 0.73      | 0.78 | 0.92    | -1.07  | 0.40    | 0.78      | 0.87 | 0.90    | -0.81  | 0.54    | 0.93      | 0.99 | 1.00    | -0.83  | 0.53    | 0.92      | 0.96 | 1.00    | -0.91  | 0.50    | 0.96      | 0.98 | 1.00    |
| Dorea                         | 0.42   | 0.64    | 0.30      | 0.87 | 0.85    | 0.45   | 0.60    | 0.36      | 0.98 | 0.90    | 0.50   | 0.57    | 0.41      | 1.00 | 0.89    | 0.51   | 0.56    | 0.42      | 0.96 | 0.89    | 0.42   | 0.63    | 0.47      | 0.98 | 0.89    |
| DTU089                        | 1.15   | 0.25    | 0.26      | 0.61 | 0.83    | 0.79   | 0.41    | 0.42      | 0.89 | 0.90    | 0.40   | 0.69    | 0.61      | 1.00 | 0.94    | 0.40   | 0.69    | 0.59      | 0.99 | 0.96    | 0.56   | 0.58    | 0.55      | 0.98 | 0.93    |
| Eggerthella                   | -1.15  | 0.22    | 0.71      | 0.59 | 0.92    | -1.48  | 0.10    | 0.50      | 0.72 | 0.90    | -0.92  | 0.35    | 0.75      | 0.93 | 1.00    | -0.89  | 0.36    | 0.80      | 0.96 | 1.00    | -0.86  | 0.38    | 0.74      | 0.98 | 1.00    |
| Eisenbergiella                | -1.21  | 0.18    | 0.66      | 0.59 | 0.92    | -1.23  | 0.16    | 0.62      | 0.74 | 0.90    | -1.17  | 0.21    | 0.85      | 0.93 | 1.00    | -1.21  | 0.20    | 0.89      | 0.96 | 1.00    | -1.11  | 0.24    | 0.87      | 0.98 | 1.00    |
| Erysipelatoclostridium        | 0.20   | 0.83    | 0.34      | 0.94 | 0.86    | 0.08   | 0.93    | 0.45      | 0.98 | 0.90    | 0.31   | 0.75    | 0.25      | 1.00 | 0.89    | 0.29   | 0.77    | 0.24      | 0.99 | 0.86    | 0.42   | 0.67    | 0.18      | 0.98 | 0.89    |
| Erysipelotrichaceae_UCG.003   | 0.98   | 0.18    | 0.27      | 0.59 | 0.83    | 0.96   | 0.18    | 0.22      | 0.74 | 0.90    | 0.54   | 0.48    | 0.43      | 0.93 | 0.89    | 0.52   | 0.49    | 0.44      | 0.96 | 0.89    | 0.45   | 0.55    | 0.45      | 0.98 | 0.89    |
| Escherichia_Shigella          | -0.56  | 0.40    | 0.86      | 0.76 | 0.97    | -0.11  | 0.86    | 0.54      | 0.98 | 0.90    | -0.07  | 0.92    | 0.63      | 1.00 | 0.94    | -0.05  | 0.94    | 0.62      | 0.99 | 0.96    | -0.03  | 0.97    | 0.58      | 1.00 | 0.94    |
| Faecalibacterium              | 0.78   | 0.52    | 0.81      | 0.80 | 0.95    | 0.16   | 0.89    | 0.89      | 0.98 | 0.93    | 0.03   | 0.98    | 0.94      | 1.00 | 1.00    | 0.06   | 0.96    | 0.95      | 0.99 | 1.00    | 0.14   | 0.91    | 0.97      | 1.00 | 1.00    |
| Family_XIII_AD3011_group      | 1.31   | 0.16    | 0.46      | 0.59 | 0.88    | 0.81   | 0.38    | 0.56      | 0.87 | 0.90    | 0.85   | 0.39    | 0.37      | 0.93 | 0.89    | 0.79   | 0.43    | 0.38      | 0.96 | 0.89    | 0.66   | 0.51    | 0.45      | 0.98 | 0.89    |
| Family_XIII_UCG.001           | 1.47   | 0.20    | 0.51      | 0.59 | 0.88    | 1.26   | 0.26    | 0.45      | 0.86 | 0.90    | 1.36   | 0.25    | 0.32      | 0.93 | 0.89    | 1.30   | 0.28    | 0.32      | 0.96 | 0.89    | 1.23   | 0.31    | 0.36      | 0.98 | 0.89    |
| FD2005                        | -0.75  | 0.47    | 0.66      | 0.78 | 0.92    | -0.13  | 0.90    | 0.88      | 0.98 | 0.93    | 0.06   | 0.95    | 0.79      | 1.00 | 1.00    | 0.05   | 0.97    | 0.82      | 0.99 | 1.00    | 0.08   | 0.94    | 0.74      | 1.00 | 1.00    |
| Flavonifractor                | -0.39  | 0.66    | 0.48      | 0.87 | 0.88    | -0.50  | 0.57    | 0.61      | 0.95 | 0.90    | -0.41  | 0.66    | 0.62      | 1.00 | 0.94    | -0.38  | 0.68    | 0.60      | 0.99 | 0.96    | -0.28  | 0.77    | 0.53      | 0.98 | 0.90    |
| Fournierella                  | 0.48   | 0.66    | 0.65      | 0.87 | 0.92    | 0.28   | 0.79    | 0.78      | 0.98 | 0.90    | 0.37   | 0.74    | 0.45      | 1.00 | 0.90    | 0.31   | 0.78    | 0.47      | 0.99 | 0.90    | 0.32   | 0.78    | 0.48      | 0.98 | 0.89    |
| Frisingicoccus                | 0.47   | 0.57    | 0.53      | 0.84 | 0.89    | 0.15   | 0.86    | 0.69      | 0.98 | 0.90    | -0.06  | 0.95    | 0.70      | 1.00 | 0.98    | -0.07  | 0.93    | 0.69      | 0.99 | 0.99    | -0.16  | 0.86    | 0.84      | 1.00 | 1.00    |
| Fusificatenibacter            | 0.14   | 0.85    | 0.78      | 0.94 | 0.93    | -0.06  | 0.94    | 0.79      | 0.98 | 0.90    | -0.61  | 0.43    | 0.39      | 0.93 | 0.89    | -0.57  | 0.46    | 0.39      | 0.96 | 0.89    | -0.82  | 0.30    | 0.27      | 0.98 | 0.89    |
| Fusobacterium                 | 0.62   | 0.49    | 0.69      | 0.79 | 0.92    | 0.93   | 0.28    | 0.82      | 0.87 | 0.92    | 1.44   | 0.12    | 0.76      | 0.93 | 1.00    | 1.41   | 0.13    | 0.76      | 0.96 | 1.00    | 1.57   | 0.09    | 0.52      | 0.98 | 0.90    |
| GCA.900066575                 | 1.74   | 0.10    | 0.39      | 0.55 | 0.86    | 1.34   | 0.19    | 0.38      | 0.74 | 0.90    | 1.14   | 0.29    | 0.36      | 0.93 | 0.89    | 1.10   | 0.32    | 0.36      | 0.96 | 0.89    | 1.15   | 0.29    | 0.25      | 0.98 | 0.89    |
| Gordonibacter                 | 1.79   | 0.12    | 0.17      | 0.59 | 0.81    | 1.06   | 0.35    | 0.40      | 0.87 | 0.90    | 1.31   | 0.27    | 0.26      | 0.93 | 0.89    | 1.27   | 0.29    | 0.25      | 0.96 | 0.86    | 1.14   | 0.34    | 0.30      | 0.98 | 0.89    |
| Granulicatella                | 0.08   | 0.95    | 0.99      | 0.98 | 0.99    | 0.41   | 0.74    | 0.73      | 0.98 | 0.90    | 0.95   | 0.46    | 0.68      | 0.93 | 0.97    | 1.03   | 0.42    | 0.64      | 0.96 | 0.96    | 1.14   | 0.38    | 0.67      | 0.98 | 1.00    |

|                       |       |      |      |      |      |       |      |      |      |      |       |      |      |      |      |       |      |      |      |      |       |      |      |      |      |
|-----------------------|-------|------|------|------|------|-------|------|------|------|------|-------|------|------|------|------|-------|------|------|------|------|-------|------|------|------|------|
| Monoglobus            | 1.02  | 0.21 | 0.97 | 0.59 | 0.99 | 0.63  | 0.43 | 0.73 | 0.90 | 0.90 | 0.35  | 0.69 | 0.48 | 1.00 | 0.92 | 0.34  | 0.69 | 0.50 | 0.99 | 0.92 | 0.18  | 0.83 | 0.37 | 1.00 | 0.89 |
| Moryella              | 1.20  | 0.34 | 0.70 | 0.75 | 0.92 | 0.80  | 0.51 | 0.69 | 0.93 | 0.90 | 0.19  | 0.89 | 0.91 | 1.00 | 1.00 | 0.18  | 0.90 | 0.92 | 0.99 | 1.00 | 0.06  | 0.96 | 1.00 | 1.00 | 1.00 |
| Negativibacillus      | 1.13  | 0.13 | 0.05 | 0.59 | 0.81 | 1.30  | 0.07 | 0.02 | 0.72 | 0.66 | 1.21  | 0.12 | 0.02 | 0.93 | 0.77 | 1.19  | 0.12 | 0.02 | 0.96 | 0.84 | 1.14  | 0.14 | 0.02 | 0.98 | 0.80 |
| NK4A214_group         | 0.78  | 0.20 | 0.15 | 0.59 | 0.81 | 0.57  | 0.34 | 0.14 | 0.87 | 0.90 | 0.20  | 0.76 | 0.26 | 1.00 | 0.89 | 0.15  | 0.81 | 0.28 | 0.99 | 0.86 | 0.08  | 0.90 | 0.35 | 1.00 | 0.89 |
| Odoribacter           | 1.26  | 0.02 | 0.44 | 0.42 | 0.87 | 0.97  | 0.07 | 0.75 | 0.72 | 0.90 | 0.50  | 0.38 | 1.00 | 0.93 | 1.00 | 0.49  | 0.39 | 0.99 | 0.96 | 1.00 | 0.44  | 0.45 | 1.00 | 0.98 | 1.00 |
| Oscillibacter         | 0.40  | 0.69 | 0.76 | 0.88 | 0.93 | 0.28  | 0.77 | 0.64 | 0.98 | 0.90 | 0.45  | 0.66 | 0.54 | 1.00 | 0.94 | 0.40  | 0.70 | 0.55 | 0.99 | 0.95 | 0.25  | 0.82 | 0.63 | 1.00 | 0.98 |
| Oscillospira          | 1.86  | 0.15 | 0.41 | 0.59 | 0.86 | 1.64  | 0.19 | 0.56 | 0.74 | 0.90 | 1.59  | 0.22 | 0.55 | 0.93 | 0.94 | 1.60  | 0.22 | 0.53 | 0.96 | 0.92 | 1.79  | 0.18 | 0.47 | 0.98 | 0.89 |
| Oxalobacter           | 1.35  | 0.19 | 0.58 | 0.59 | 0.92 | 0.84  | 0.40 | 0.50 | 0.87 | 0.90 | 0.85  | 0.43 | 0.33 | 0.93 | 0.89 | 0.83  | 0.44 | 0.34 | 0.96 | 0.89 | 0.77  | 0.48 | 0.41 | 0.98 | 0.89 |
| Paludicola            | 1.44  | 0.18 | 0.50 | 0.59 | 0.88 | 1.04  | 0.32 | 0.43 | 0.87 | 0.90 | 0.68  | 0.55 | 0.52 | 0.99 | 0.94 | 0.61  | 0.59 | 0.52 | 0.96 | 0.92 | 0.50  | 0.67 | 0.71 | 0.98 | 1.00 |
| Parabacteroides       | 1.38  | 0.07 | 0.23 | 0.44 | 0.82 | 1.34  | 0.07 | 0.45 | 0.72 | 0.90 | 0.87  | 0.25 | 0.86 | 0.93 | 1.00 | 0.91  | 0.23 | 0.83 | 0.96 | 1.00 | 0.96  | 0.21 | 0.77 | 0.98 | 1.00 |
| Paraprevotella        | -0.05 | 0.93 | 0.77 | 0.98 | 0.93 | 0.03  | 0.95 | 0.66 | 0.98 | 0.90 | -0.21 | 0.71 | 0.45 | 1.00 | 0.90 | -0.23 | 0.68 | 0.44 | 0.99 | 0.89 | -0.23 | 0.69 | 0.44 | 0.98 | 0.89 |
| Parasutterella        | 0.78  | 0.16 | 0.79 | 0.59 | 0.93 | 0.63  | 0.24 | 0.91 | 0.83 | 0.95 | 0.47  | 0.41 | 0.83 | 0.93 | 1.00 | 0.48  | 0.40 | 0.83 | 0.96 | 1.00 | 0.40  | 0.50 | 0.83 | 0.98 | 1.00 |
| Peptococcus           | 2.55  | 0.02 | 0.01 | 0.42 | 0.31 | 2.05  | 0.06 | 0.01 | 0.72 | 0.47 | 1.63  | 0.16 | 0.01 | 0.93 | 0.68 | 1.59  | 0.17 | 0.01 | 0.96 | 0.78 | 1.50  | 0.20 | 0.01 | 0.98 | 0.79 |
| Phascolarctobacterium | 1.39  | 0.01 | 0.10 | 0.35 | 0.81 | 1.40  | 0.01 | 0.12 | 0.56 | 0.90 | 1.55  | 0.00 | 0.06 | 0.38 | 0.89 | 1.53  | 0.00 | 0.06 | 0.43 | 0.86 | 1.62  | 0.00 | 0.04 | 0.29 | 0.80 |
| Phocaea               | 0.22  | 0.86 | 0.78 | 0.94 | 0.93 | -0.07 | 0.96 | 0.87 | 0.98 | 0.93 | 0.18  | 0.88 | 0.62 | 1.00 | 0.94 | 0.22  | 0.86 | 0.61 | 0.99 | 0.96 | 0.39  | 0.75 | 0.47 | 0.98 | 0.89 |
| Prevotella            | -0.36 | 0.42 | 0.67 | 0.76 | 0.92 | -0.25 | 0.57 | 0.49 | 0.95 | 0.90 | -0.22 | 0.63 | 0.80 | 1.00 | 1.00 | -0.24 | 0.60 | 0.75 | 0.96 | 1.00 | -0.21 | 0.65 | 0.81 | 0.98 | 1.00 |
| Romboutsia            | -1.56 | 0.07 | 0.01 | 0.44 | 0.31 | -1.33 | 0.11 | 0.01 | 0.72 | 0.47 | -1.46 | 0.10 | 0.01 | 0.93 | 0.68 | -1.42 | 0.11 | 0.01 | 0.96 | 0.78 | -1.51 | 0.10 | 0.01 | 0.98 | 0.79 |
| Roseburia             | 0.46  | 0.61 | 0.99 | 0.87 | 0.99 | 0.32  | 0.72 | 0.97 | 0.98 | 0.98 | -0.02 | 0.99 | 0.94 | 1.00 | 1.00 | 0.00  | 1.00 | 0.93 | 1.00 | 1.00 | 0.16  | 0.87 | 0.95 | 1.00 | 1.00 |
| Ruminococcus          | 0.54  | 0.37 | 0.34 | 0.76 | 0.86 | 0.20  | 0.73 | 0.39 | 0.98 | 0.90 | 0.14  | 0.82 | 0.27 | 1.00 | 0.89 | 0.13  | 0.84 | 0.28 | 0.99 | 0.86 | 0.00  | 1.00 | 0.39 | 1.00 | 0.89 |
| Selimonas             | 0.12  | 0.90 | 0.39 | 0.97 | 0.86 | 0.04  | 0.96 | 0.46 | 0.98 | 0.90 | -0.65 | 0.48 | 0.20 | 0.93 | 0.89 | -0.72 | 0.44 | 0.19 | 0.96 | 0.86 | -0.77 | 0.40 | 0.16 | 0.98 | 0.89 |
| Senegalimassilia      | 0.63  | 0.42 | 0.90 | 0.76 | 0.98 | 0.84  | 0.27 | 0.83 | 0.86 | 0.92 | 0.78  | 0.33 | 0.88 | 0.93 | 1.00 | 0.75  | 0.35 | 0.92 | 0.96 | 1.00 | 0.75  | 0.35 | 0.93 | 0.98 | 1.00 |
| Shuttleworthia        | 0.79  | 0.46 | 0.35 | 0.78 | 0.86 | 0.05  | 0.96 | 0.43 | 0.98 | 0.90 | -0.31 | 0.78 | 0.59 | 1.00 | 0.94 | -0.36 | 0.74 | 0.60 | 0.99 | 0.96 | -0.46 | 0.68 | 0.74 | 0.98 | 1.00 |
| Slackia               | 0.25  | 0.72 | 0.51 | 0.88 | 0.88 | 0.28  | 0.68 | 0.63 | 0.98 | 0.90 | 0.38  | 0.61 | 0.51 | 1.00 | 0.94 | 0.37  | 0.61 | 0.52 | 0.96 | 0.92 | 0.33  | 0.65 | 0.46 | 0.98 | 0.89 |
| Streptococcus         | 0.02  | 0.99 | 0.25 | 1.00 | 0.82 | -0.09 | 0.93 | 0.29 | 0.98 | 0.90 | 0.50  | 0.65 | 0.30 | 1.00 | 0.89 | 0.57  | 0.60 | 0.25 | 0.96 | 0.86 | 0.44  | 0.69 | 0.34 | 0.98 | 0.89 |
| Subdoligranulum       | 1.54  | 0.06 | 0.25 | 0.44 | 0.82 | 1.32  | 0.10 | 0.23 | 0.72 | 0.90 | 1.02  | 0.23 | 0.23 | 0.93 | 0.89 | 1.01  | 0.24 | 0.23 | 0.96 | 0.86 | 1.05  | 0.22 | 0.20 | 0.98 | 0.89 |
| Sutterella            | -0.16 | 0.75 | 0.96 | 0.89 | 0.99 | 0.11  | 0.82 | 0.88 | 0.98 | 0.93 | -0.05 | 0.92 | 0.85 | 1.00 | 1.00 | -0.05 | 0.92 | 0.85 | 0.99 | 1.00 | 0.01  | 0.99 | 0.96 | 1.00 | 1.00 |
| TM7x                  | -0.92 | 0.42 | 0.68 | 0.76 | 0.92 | -1.06 | 0.34 | 0.49 | 0.87 | 0.90 | -0.21 | 0.86 | 0.28 | 1.00 | 0.89 | -0.17 | 0.88 | 0.26 | 0.99 | 0.86 | -0.32 | 0.79 | 0.36 | 0.98 | 0.89 |
| Turicibacter          | -0.52 | 0.67 | 0.18 | 0.87 | 0.81 | -0.10 | 0.94 | 0.21 | 0.98 | 0.90 | 0.37  | 0.78 | 0.41 | 1.00 | 0.89 | 0.42  | 0.75 | 0.43 | 0.99 | 0.89 | 0.41  | 0.76 | 0.52 | 0.98 | 0.90 |
| Tuzzerella            | 1.80  | 0.04 | 0.01 | 0.44 | 0.31 | 1.73  | 0.04 | 0.01 | 0.72 | 0.47 | 1.37  | 0.15 | 0.03 | 0.93 | 0.87 | 1.36  | 0.15 | 0.03 | 0.96 | 0.86 | 1.28  | 0.17 | 0.03 | 0.98 | 0.80 |
| UBA1819               | 0.99  | 0.37 | 0.37 | 0.76 | 0.86 | 0.77  | 0.48 | 0.44 | 0.93 | 0.90 | 1.15  | 0.32 | 0.32 | 0.93 | 0.89 | 1.10  | 0.34 | 0.31 | 0.96 | 0.89 | 1.21  | 0.30 | 0.28 | 0.98 | 0.89 |
| UCG.002               | 1.25  | 0.03 | 0.04 | 0.42 | 0.81 | 0.96  | 0.08 | 0.04 | 0.72 | 0.90 | 0.56  | 0.35 | 0.07 | 0.93 | 0.89 | 0.53  | 0.38 | 0.07 | 0.96 | 0.86 | 0.55  | 0.36 | 0.06 | 0.98 | 0.83 |
| UCG.003               | 1.25  | 0.06 | 0.44 | 0.44 | 0.87 | 1.08  | 0.09 | 0.30 | 0.72 | 0.90 | 0.92  | 0.18 | 0.31 | 0.93 | 0.89 | 0.91  | 0.19 | 0.31 | 0.96 | 0.89 | 0.78  | 0.26 | 0.36 | 0.98 | 0.89 |
| UCG.005               | 1.67  | 0.02 | 0.11 | 0.42 | 0.81 | 1.28  | 0.06 | 0.19 | 0.72 | 0.90 | 1.14  | 0.12 | 0.17 | 0.93 | 0.89 | 1.10  | 0.13 | 0.17 | 0.96 | 0.86 | 1.02  | 0.17 | 0.22 | 0.98 | 0.89 |
| UCG.009               | 0.43  | 0.70 | 0.72 | 0.88 | 0.92 | -0.13 | 0.91 | 0.76 | 0.98 | 0.90 | -0.96 | 0.42 | 0.94 | 0.93 | 1.00 | -0.93 | 0.43 | 0.98 | 0.96 | 1.00 | -1.04 | 0.38 | 0.89 | 0.98 | 1.00 |
| Veillonella           | -0.81 | 0.29 | 0.12 | 0.70 | 0.81 | -0.67 | 0.37 | 0.18 | 0.87 | 0.90 | -0.63 | 0.44 | 0.17 | 0.93 | 0.89 | -0.59 | 0.47 | 0.18 | 0.96 | 0.86 | -0.62 | 0.45 | 0.17 | 0.98 | 0.89 |
| Victivallis           | -0.40 | 0.62 | 0.12 | 0.87 | 0.81 | -0.53 | 0.50 | 0.17 | 0.93 | 0.90 | -1.06 | 0.21 | 0.19 | 0.93 | 0.89 | -1.08 | 0.20 | 0.19 | 0.96 | 0.86 | -1.13 | 0.19 | 0.14 | 0.98 | 0.89 |

Multivariable-adjusted regression models adjusted for:

Model 1: sequencing batch, age, race, gender, study center

Model 2: Model 1, with education

Model 3: Model 2, with physical activity, diet score, medication use, and smoking

Model 4: Model 3 with BMI

Model 5: Model 4 with hypertension and diabetes

eTable 24: Multivariable-adjusted regression coefficients, p-values, race interaction p-values, false discovery rate (FDR)-adjusted p-values for race-genera interactions with respect to MOCA.

|                               | Model1 |         |           |      |         | Model2 |         |           |      |         | Model3 |         |           |      |         | Model4 |         |           |      |         | Model5 |         |           |      |         |
|-------------------------------|--------|---------|-----------|------|---------|--------|---------|-----------|------|---------|--------|---------|-----------|------|---------|--------|---------|-----------|------|---------|--------|---------|-----------|------|---------|
|                               | beta   | p-value | p-val Int | FDR  | FDR-int | beta   | p-value | p-val Int | FDR  | FDR-int | beta   | p-value | p-val Int | FDR  | FDR-int | beta   | p-value | p-val Int | FDR  | FDR-int | beta   | p-value | p-val Int | FDR  | FDR-int |
| Acetanaerobacterium           | -0.13  | 0.76    | 0.56      | 0.84 | 0.85    | -0.13  | 0.75    | 0.94      | 0.97 | 0.98    | -0.24  | 0.56    | 0.97      | 0.87 | 1.00    | -0.24  | 0.55    | 0.96      | 0.87 | 0.99    | -0.20  | 0.64    | 0.79      | 0.90 | 0.91    |
| Acidaminococcus               | -0.21  | 0.09    | 0.31      | 0.25 | 0.76    | -0.13  | 0.25    | 0.50      | 0.60 | 0.89    | -0.08  | 0.52    | 0.27      | 0.87 | 0.87    | -0.08  | 0.52    | 0.27      | 0.87 | 0.87    | -0.05  | 0.66    | 0.22      | 0.90 | 0.83    |
| Actinomyces                   | -0.43  | 0.19    | 0.17      | 0.40 | 0.76    | -0.30  | 0.32    | 0.20      | 0.65 | 0.86    | -0.31  | 0.35    | 0.13      | 0.77 | 0.79    | -0.31  | 0.35    | 0.13      | 0.76 | 0.79    | -0.24  | 0.46    | 0.14      | 0.83 | 0.74    |
| Adlercreutzia                 | 0.21   | 0.35    | 0.23      | 0.57 | 0.76    | 0.09   | 0.66    | 0.44      | 0.94 | 0.89    | 0.01   | 0.95    | 0.57      | 0.99 | 0.87    | 0.01   | 0.95    | 0.56      | 0.98 | 0.87    | 0.04   | 0.84    | 0.45      | 0.97 | 0.85    |
| Agathobacter                  | -0.47  | 0.10    | 0.30      | 0.26 | 0.76    | -0.53  | 0.05    | 0.22      | 0.39 | 0.86    | -0.54  | 0.04    | 0.27      | 0.37 | 0.87    | -0.54  | 0.05    | 0.27      | 0.38 | 0.87    | -0.53  | 0.06    | 0.27      | 0.41 | 0.85    |
| Akkermansia                   | 0.40   | 0.01    | 0.07      | 0.07 | 0.59    | 0.27   | 0.04    | 0.14      | 0.39 | 0.79    | 0.20   | 0.18    | 0.35      | 0.61 | 0.87    | 0.20   | 0.18    | 0.34      | 0.61 | 0.87    | 0.17   | 0.24    | 0.40      | 0.67 | 0.85    |
| Alistipes                     | 0.32   | 0.20    | 0.74      | 0.40 | 0.92    | 0.18   | 0.45    | 0.99      | 0.73 | 1.00    | 0.09   | 0.70    | 0.94      | 0.91 | 0.99    | 0.09   | 0.69    | 0.93      | 0.90 | 0.99    | 0.10   | 0.69    | 0.84      | 0.92 | 0.94    |
| Allisonella                   | -0.42  | 0.07    | 0.48      | 0.23 | 0.80    | -0.07  | 0.75    | 0.74      | 0.97 | 0.97    | -0.08  | 0.73    | 0.84      | 0.91 | 0.94    | -0.08  | 0.73    | 0.82      | 0.91 | 0.93    | -0.11  | 0.65    | 0.76      | 0.90 | 0.91    |
| Anaerofilum                   | 0.36   | 0.28    | 0.41      | 0.48 | 0.76    | 0.05   | 0.88    | 0.49      | 0.99 | 0.89    | 0.05   | 0.89    | 0.49      | 0.98 | 0.87    | 0.04   | 0.90    | 0.49      | 0.98 | 0.87    | 0.05   | 0.89    | 0.49      | 0.97 | 0.85    |
| Anaerostipes                  | 0.12   | 0.68    | 0.53      | 0.81 | 0.83    | -0.02  | 0.95    | 0.42      | 0.99 | 0.89    | 0.00   | 0.99    | 0.55      | 0.99 | 0.87    | 0.01   | 0.98    | 0.56      | 0.99 | 0.87    | 0.05   | 0.86    | 0.63      | 0.97 | 0.87    |
| Anaerotruncus                 | 0.53   | 0.05    | 0.08      | 0.20 | 0.59    | 0.43   | 0.09    | 0.08      | 0.39 | 0.70    | 0.65   | 0.02    | 0.02      | 0.23 | 0.58    | 0.64   | 0.02    | 0.24      | 0.59 | 0.69    | 0.01   | 0.01    | 0.17      | 0.48 | 0.48    |
| Bacteroides                   | 0.14   | 0.73    | 0.58      | 0.83 | 0.86    | 0.01   | 0.97    | 0.64      | 1.00 | 0.93    | 0.01   | 0.98    | 0.59      | 0.99 | 0.87    | 0.02   | 0.96    | 0.58      | 0.98 | 0.87    | 0.04   | 0.91    | 0.53      | 0.97 | 0.85    |
| Barnesiella                   | -0.02  | 0.89    | 0.11      | 0.91 | 0.63    | 0.00   | 0.97    | 0.14      | 1.00 | 0.79    | 0.09   | 0.53    | 0.38      | 0.87 | 0.87    | 0.09   | 0.54    | 0.38      | 0.87 | 0.87    | 0.08   | 0.57    | 0.30      | 0.89 | 0.85    |
| Bifidobacterium               | -0.08  | 0.68    | 0.80      | 0.81 | 0.93    | 0.02   | 0.93    | 1.00      | 0.99 | 1.00    | 0.02   | 0.89    | 0.90      | 0.98 | 0.97    | 0.03   | 0.87    | 0.88      | 0.98 | 0.96    | 0.00   | 0.99    | 0.98      | 0.99 | 0.98    |
| Bifilophila                   | 0.29   | 0.11    | 0.28      | 0.28 | 0.76    | 0.14   | 0.43    | 0.67      | 0.73 | 0.93    | -0.04  | 0.84    | 0.76      | 0.98 | 0.91    | -0.03  | 0.85    | 0.77      | 0.98 | 0.93    | -0.01  | 0.96    | 0.88      | 0.97 | 0.95    |
| Blautia                       | -0.34  | 0.57    | 0.47      | 0.75 | 0.78    | -0.49  | 0.37    | 0.51      | 0.69 | 0.89    | -0.26  | 0.65    | 0.69      | 0.87 | 0.89    | -0.26  | 0.65    | 0.71      | 0.88 | 0.90    | -0.02  | 0.97    | 0.88      | 0.98 | 0.95    |
| Butyricoccus                  | 0.28   | 0.50    | 0.93      | 0.70 | 1.00    | -0.16  | 0.68    | 0.65      | 0.95 | 0.93    | -0.31  | 0.43    | 0.68      | 0.81 | 0.89    | -0.31  | 0.43    | 0.69      | 0.82 | 0.90    | -0.32  | 0.42    | 0.68      | 0.83 | 0.88    |
| Butyricimonas                 | 0.13   | 0.39    | 0.90      | 0.59 | 0.99    | 0.07   | 0.62    | 0.89      | 0.92 | 0.98    | 0.18   | 0.22    | 0.49      | 0.61 | 0.87    | 0.18   | 0.22    | 0.50      | 0.63 | 0.87    | 0.16   | 0.29    | 0.51      | 0.70 | 0.85    |
| CAG_56                        | -0.11  | 0.54    | 0.12      | 0.73 | 0.63    | -0.13  | 0.44    | 0.23      | 0.73 | 0.86    | -0.09  | 0.60    | 0.40      | 0.87 | 0.87    | -0.09  | 0.61    | 0.41      | 0.88 | 0.87    | -0.08  | 0.66    | 0.40      | 0.90 | 0.85    |
| Candidatus_Soleaferrea        | 0.08   | 0.84    | 0.33      | 0.88 | 0.76    | 0.00   | 0.99    | 0.23      | 1.00 | 0.86    | 0.04   | 0.91    | 0.25      | 0.98 | 0.87    | 0.04   | 0.91    | 0.25      | 0.98 | 0.87    | 0.08   | 0.84    | 0.20      | 0.97 | 0.83    |
| Caproiciproducens             | 0.13   | 0.69    | 0.38      | 0.81 | 0.76    | 0.05   | 0.86    | 0.55      | 0.99 | 0.89    | -0.02  | 0.95    | 0.70      | 0.99 | 0.89    | -0.02  | 0.94    | 0.70      | 0.98 | 0.90    | 0.02   | 0.94    | 0.59      | 0.97 | 0.87    |
| Christensenellaceae_R.7_group | 0.42   | 0.01    | 0.23      | 0.08 | 0.76    | 0.27   | 0.07    | 0.46      | 0.39 | 0.89    | 0.27   | 0.08    | 0.45      | 0.48 | 0.87    | 0.27   | 0.08    | 0.45      | 0.49 | 0.87    | 0.30   | 0.06    | 0.38      | 0.41 | 0.85    |
| Clostridium_sensu_stricto_1   | -0.20  | 0.34    | 0.11      | 0.56 | 0.63    | -0.13  | 0.52    | 0.15      | 0.80 | 0.79    | -0.16  | 0.44    | 0.10      | 0.81 | 0.77    | -0.16  | 0.44    | 0.10      | 0.82 | 0.76    | -0.14  | 0.51    | 0.13      | 0.85 | 0.74    |
| Colidextribacter              | -0.30  | 0.40    | 0.58      | 0.59 | 0.86    | -0.33  | 0.32    | 0.88      | 0.65 | 0.98    | -0.15  | 0.65    | 0.76      | 0.87 | 0.91    | -0.15  | 0.65    | 0.74      | 0.88 | 0.92    | -0.07  | 0.83    | 0.65      | 0.97 | 0.87    |
| Collinsella                   | -0.19  | 0.25    | 0.42      | 0.46 | 0.76    | 0.00   | 1.00    | 0.54      | 1.00 | 0.89    | -0.02  | 0.91    | 0.58      | 0.98 | 0.87    | -0.02  | 0.90    | 0.57      | 0.98 | 0.87    | -0.03  | 0.86    | 0.57      | 0.97 | 0.85    |
| Coprobacter                   | 0.33   | 0.11    | 0.15      | 0.28 | 0.69    | 0.26   | 0.18    | 0.11      | 0.47 | 0.79    | 0.28   | 0.16    | 0.05      | 0.60 | 0.72    | 0.28   | 0.16    | 0.05      | 0.59 | 0.72    | 0.28   | 0.17    | 0.06      | 0.58 | 0.68    |
| Coprococcus                   | -0.13  | 0.53    | 0.22      | 0.73 | 0.76    | -0.06  | 0.76    | 0.48      | 0.97 | 0.89    | 0.11   | 0.58    | 0.79      | 0.87 | 0.93    | 0.11   | 0.58    | 0.79      | 0.88 | 0.93    | 0.11   | 0.56    | 0.77      | 0.89 | 0.91    |
| Defluviitaleaceae_UCG.011     | 0.75   | 0.01    | 0.07      | 0.11 | 0.59    | 0.63   | 0.03    | 0.07      | 0.29 | 0.70    | 0.61   | 0.04    | 0.11      | 0.37 | 0.77    | 0.61   | 0.04    | 0.11      | 0.38 | 0.76    | 0.62   | 0.04    | 0.09      | 0.39 | 0.68    |
| Desulfovibrio                 | -0.04  | 0.80    | 0.40      | 0.85 | 0.76    | -0.02  | 0.91    | 0.36      | 0.99 | 0.89    | 0.07   | 0.66    | 0.20      | 0.87 | 0.84    | 0.06   | 0.69    | 0.21      | 0.90 | 0.87    | 0.06   | 0.72    | 0.24      | 0.93 | 0.85    |
| Dialister                     | -0.25  | 0.06    | 0.05      | 0.22 | 0.59    | -0.21  | 0.08    | 0.07      | 0.39 | 0.70    | -0.20  | 0.12    | 0.14      | 0.59 | 0.79    | -0.20  | 0.12    | 0.14      | 0.59 | 0.79    | -0.19  | 0.16    | 0.16      | 0.58 | 0.74    |
| DNF0809                       | -0.15  | 0.66    | 0.19      | 0.81 | 0.76    | -0.17  | 0.59    | 0.22      | 0.90 | 0.86    | 0.15   | 0.65    | 0.60      | 0.87 | 0.87    | 0.15   | 0.65    | 0.60      | 0.88 | 0.87    | -0.16  | 0.63    | 0.62      | 0.90 | 0.87    |
| Dorea                         | 0.17   | 0.45    | 0.30      | 0.65 | 0.76    | 0.19   | 0.39    | 0.39      | 0.70 | 0.89    | 0.26   | 0.24    | 0.27      | 0.62 | 0.87    | 0.26   | 0.24    | 0.27      | 0.63 | 0.87    | 0.24   | 0.27    | 0.31      | 0.70 | 0.85    |
| DTU089                        | 0.44   | 0.10    | 0.15      | 0.26 | 0.69    | 0.29   | 0.24    | 0.31      | 0.60 | 0.89    | 0.24   | 0.35    | 0.56      | 0.77 | 0.87    | 0.24   | 0.35    | 0.55      | 0.76 | 0.87    | 0.27   | 0.30    | 0.50      | 0.70 | 0.85    |
| Eggerthella                   | -0.35  | 0.17    | 0.32      | 0.36 | 0.76    | -0.46  | 0.05    | 0.14      | 0.39 | 0.79    | -0.28  | 0.24    | 0.40      | 0.62 | 0.87    | -0.28  | 0.25    | 0.42      | 0.63 | 0.87    | -0.25  | 0.32    | 0.43      | 0.70 | 0.85    |
| Eisenbergiella                | -0.09  | 0.70    | 0.51      | 0.81 | 0.81    | -0.11  | 0.64    | 0.42      | 0.94 | 0.89    | -0.07  | 0.76    | 0.60      | 0.94 | 0.87    | -0.07  | 0.75    | 0.61      | 0.93 | 0.87    | -0.05  | 0.82    | 0.60      | 0.97 | 0.87    |
| Erysipelatoclostridium        | -0.07  | 0.79    | 0.71      | 0.85 | 0.92    | -0.11  | 0.65    | 0.95      | 0.94 | 0.98    | 0.00   | 0.99    | 0.76      | 0.99 | 0.91    | 0.00   | 0.99    | 0.75      | 0.99 | 0.92    | 0.02   | 0.93    | 0.71      | 0.97 | 0.90    |
| Erysipelotrichaceae_UCG.003   | 0.30   | 0.13    | 0.23      | 0.30 | 0.76    | 0.29   | 0.11    | 0.14      | 0.39 | 0.79    | 0.11   | 0.55    | 0.61      | 0.87 | 0.87    | 0.11   | 0.55    | 0.61      | 0.87 | 0.87    | 0.11   | 0.55    | 0.56      | 0.89 | 0.85    |
| Escherichia_Shigella          | -0.21  | 0.24    | 0.67      | 0.44 | 0.92    | -0.04  | 0.83    | 0.85      | 0.99 | 0.98    | -0.09  | 0.59    | 0.99      | 0.87 | 1.00    | -0.09  | 0.60    | 0.99      | 0.88 | 0.99    | -0.10  | 0.56    | 0.98      | 0.89 | 0.98    |
| Faecalibacterium              | 0.59   | 0.07    | 0.37      | 0.23 | 0.76    | 0.33   | 0.28    | 0.76      | 0.63 | 0.97    | 0.31   | 0.31    | 0.70      | 0.75 | 0.89    | 0.31   | 0.30    | 0.69      | 0.73 | 0.90    | 0.33   | 0.29    | 0.65      | 0.70 | 0.87    |
| Family_XIII_AD3011_group      | 0.58   | 0.02    | 0.26      | 0.12 | 0.76    | 0.36   | 0.12    | 0.36      | 0.40 | 0.89    | 0.49   | 0.05    | 0.14      | 0.37 | 0.79    | 0.49   | 0.05    | 0.14      | 0.38 | 0.79    | 0.50   | 0.05    | 0.12      | 0.41 | 0.74    |
| Family_XIII_UCG.001           | 0.46   | 0.13    | 0.38      | 0.30 | 0.76    | 0.37   | 0.20    | 0.29      | 0.51 | 0.89    | 0.36   | 0.22    | 0.35      | 0.61 | 0.87    | 0.36   | 0.23    | 0.35      | 0.63 | 0.87    | 0.36   | 0.23    | 0.33      | 0.67 | 0.85    |
| FD2005                        | -0.51  | 0.06    | 0.30      | 0.22 | 0.76    | -0.25  | 0.33    | 0.91      | 0.65 | 0.98    | -0.21  | 0.44    | 0.96      | 0.81 | 0.99    | -0.21  | 0.43    | 0.95      | 0.82 | 0.99    | -0.20  | 0.45    | 0.97      | 0.83 | 0.98    |
| Flavonifractor                | -0.22  | 0.37    | 0.75      | 0.59 | 0.92    | -0.26  | 0.25    | 0.48      | 0.60 | 0.89    | -0.15  | 0.54    | 0.62      | 0.87 | 0.87    | -0.14  | 0.55    | 0.63      | 0.87 | 0.88    | -0.09  | 0.72    | 0.74      | 0.93 | 0.91    |
| Fournierella                  | 0.12   | 0.68    | 0.98      | 0.81 | 1.00    | 0.03   | 0.93    | 0.78      | 0.99 | 0.97    | 0.21   | 0.45    | 0.73      | 0.81 | 0.91    | 0.21   | 0.46    | 0.74      | 0.83 | 0.92    | 0.19   | 0.51    | 0.79      | 0.85 | 0.91    |
| Frisingococcus                | 0.61   | 0.01    | 0.03      | 0.07 | 0.49    | 0.51   | 0.01    | 0.04      | 0.23 | 0.58    | 0.38   | 0.08    | 0.11      | 0.48 | 0.77    | 0.38   | 0.08    | 0.11      | 0.49 | 0.76    | 0.41   | 0.06    | 0.10      | 0.41 | 0.69    |
| Fusicatenibacter              | -0.06  | 0.75    | 0.73      | 0.83 | 0.92    | -0.14  | 0.46    | 0.77      | 0.73 | 0.97    | -0.27  | 0.17    | 0.47      | 0.61 | 0.87    | -0.26  | 0.18    | 0.47      | 0.61 | 0.87    | -0.26  | 0.19    | 0.51      | 0.61 | 0.85    |
| Fusobacterium                 | -0.53  | 0.02    | 0.03      | 0.13 | 0.49    | -0.38  | 0.08    | 0.04      | 0.39 | 0.58    | -0.32  | 0.16    | 0.05      | 0.60 | 0.72    | -0.33  | 0.15    | 0.05      | 0.59 | 0.72    | -0.34  | 0.14    | 0.06      | 0.58 | 0.68    |
| GCA.900066575                 | 0.63   | 0.02    | 0.34      | 0.13 | 0.76    | 0.45   | 0.09    | 0.32      | 0.39 | 0.89    | 0.39   | 0.16    | 0.37      | 0.60 | 0.87    | 0.38   | 0.16    | 0.37      | 0.59 | 0.87    | 0.40   | 0.15    | 0.30      | 0.58 | 0.85    |
| Gordonibacter                 | 0.32   | 0.29    | 0.18      | 0.49 | 0.76    | 0.05   | 0.87    | 0.54      | 0.99 | 0.89    | 0.06   | 0.84    | 0.57      | 0.98 | 0.87    | 0.05   | 0.85    | 0.56      | 0.98 | 0.87    | 0.07   | 0.81    | 0.54      | 0.97 | 0.85    |
| Granulicatella                | -0.29  | 0.38    | 0.82      | 0.59 | 0.95    | -0.16  | 0.60    | 0.82      | 0.90 | 0.97    | -0.35  | 0.27    | 0.64      | 0.67 | 0.87    | -0.35  | 0.28    | 0.65      | 0.69 | 0.88    | -0.35  | 0.29    | 0.64      | 0.70 | 0.87    |

|                       |       |      |      |      |      |       |      |      |      |      |       |      |      |      |      |       |      |      |      |      |       |      |      |      |      |
|-----------------------|-------|------|------|------|------|-------|------|------|------|------|-------|------|------|------|------|-------|------|------|------|------|-------|------|------|------|------|
| Monoglobus            | 0.49  | 0.02 | 0.93 | 0.13 | 1.00 | 0.34  | 0.10 | 0.74 | 0.39 | 0.97 | 0.14  | 0.52 | 0.16 | 0.87 | 0.83 | 0.14  | 0.53 | 0.16 | 0.87 | 0.86 | 0.16  | 0.47 | 0.17 | 0.83 | 0.74 |
| Moryella              | 0.26  | 0.45 | 0.69 | 0.65 | 0.92 | 0.07  | 0.81 | 0.66 | 0.99 | 0.93 | 0.17  | 0.61 | 0.99 | 0.87 | 1.00 | 0.17  | 0.61 | 0.98 | 0.88 | 0.99 | 0.17  | 0.62 | 0.93 | 0.90 | 0.98 |
| Negativibacillus      | -0.06 | 0.77 | 0.46 | 0.84 | 0.78 | 0.02  | 0.91 | 0.24 | 0.99 | 0.87 | 0.09  | 0.65 | 0.19 | 0.87 | 0.84 | 0.09  | 0.66 | 0.20 | 0.88 | 0.87 | 0.14  | 0.48 | 0.12 | 0.83 | 0.74 |
| NK4A214_group         | 0.25  | 0.12 | 0.60 | 0.29 | 0.88 | 0.16  | 0.29 | 0.58 | 0.65 | 0.89 | 0.15  | 0.34 | 0.55 | 0.77 | 0.87 | 0.15  | 0.35 | 0.56 | 0.76 | 0.87 | 0.16  | 0.31 | 0.51 | 0.70 | 0.85 |
| Odoribacter           | 0.37  | 0.01 | 0.03 | 0.11 | 0.49 | 0.23  | 0.09 | 0.14 | 0.39 | 0.79 | 0.26  | 0.07 | 0.06 | 0.47 | 0.73 | 0.26  | 0.07 | 0.06 | 0.48 | 0.74 | 0.27  | 0.07 | 0.05 | 0.41 | 0.68 |
| Oscillibacter         | 0.44  | 0.09 | 0.33 | 0.26 | 0.76 | 0.41  | 0.10 | 0.19 | 0.39 | 0.86 | 0.53  | 0.04 | 0.08 | 0.37 | 0.74 | 0.52  | 0.05 | 0.08 | 0.38 | 0.74 | 0.59  | 0.03 | 0.05 | 0.29 | 0.68 |
| Oscillospira          | 0.03  | 0.93 | 0.72 | 0.94 | 0.92 | -0.04 | 0.90 | 0.44 | 0.99 | 0.89 | -0.02 | 0.96 | 0.33 | 0.99 | 0.87 | -0.02 | 0.96 | 0.34 | 0.98 | 0.87 | 0.09  | 0.80 | 0.47 | 0.97 | 0.85 |
| Oxalobacter           | 0.16  | 0.56 | 0.44 | 0.75 | 0.78 | -0.05 | 0.84 | 0.51 | 0.99 | 0.89 | -0.06 | 0.82 | 0.58 | 0.98 | 0.87 | -0.06 | 0.82 | 0.58 | 0.98 | 0.87 | -0.07 | 0.79 | 0.55 | 0.97 | 0.85 |
| Paludicola            | 0.57  | 0.05 | 0.45 | 0.20 | 0.78 | 0.43  | 0.11 | 0.29 | 0.39 | 0.89 | 0.26  | 0.36 | 0.66 | 0.77 | 0.88 | 0.26  | 0.37 | 0.66 | 0.79 | 0.88 | 0.28  | 0.33 | 0.67 | 0.70 | 0.88 |
| Parabacteroides       | 0.18  | 0.38 | 0.31 | 0.59 | 0.76 | 0.17  | 0.36 | 0.68 | 0.68 | 0.93 | 0.17  | 0.36 | 0.82 | 0.77 | 0.93 | 0.18  | 0.35 | 0.80 | 0.76 | 0.93 | 0.19  | 0.33 | 0.75 | 0.70 | 0.91 |
| Paraprevotella        | -0.13 | 0.36 | 0.61 | 0.57 | 0.88 | -0.10 | 0.43 | 0.42 | 0.73 | 0.89 | -0.20 | 0.16 | 0.30 | 0.60 | 0.87 | -0.20 | 0.16 | 0.30 | 0.59 | 0.87 | -0.17 | 0.23 | 0.38 | 0.67 | 0.85 |
| Parasutterella        | 0.60  | 0.00 | 0.01 | 0.00 | 0.49 | 0.54  | 0.00 | 0.02 | 0.01 | 0.58 | 0.43  | 0.00 | 0.08 | 0.11 | 0.74 | 0.43  | 0.00 | 0.08 | 0.11 | 0.74 | 0.43  | 0.00 | 0.09 | 0.11 | 0.68 |
| Peptococcus           | 0.90  | 0.00 | 0.02 | 0.06 | 0.49 | 0.69  | 0.02 | 0.02 | 0.23 | 0.58 | 0.73  | 0.01 | 0.02 | 0.23 | 0.58 | 0.73  | 0.01 | 0.02 | 0.24 | 0.59 | 0.72  | 0.02 | 0.02 | 0.21 | 0.68 |
| Phascolarctobacterium | 0.29  | 0.03 | 0.15 | 0.15 | 0.69 | 0.28  | 0.03 | 0.20 | 0.29 | 0.86 | 0.26  | 0.05 | 0.35 | 0.37 | 0.87 | 0.26  | 0.05 | 0.35 | 0.38 | 0.87 | 0.24  | 0.08 | 0.38 | 0.45 | 0.85 |
| Phocaea               | -0.75 | 0.02 | 0.10 | 0.13 | 0.63 | -0.88 | 0.00 | 0.04 | 0.10 | 0.58 | -0.99 | 0.00 | 0.05 | 0.08 | 0.72 | -0.99 | 0.00 | 0.05 | 0.08 | 0.72 | -0.96 | 0.00 | 0.07 | 0.11 | 0.68 |
| Prevotella            | -0.15 | 0.21 | 0.77 | 0.41 | 0.92 | -0.11 | 0.34 | 0.92 | 0.66 | 0.98 | -0.09 | 0.45 | 0.81 | 0.81 | 0.93 | -0.09 | 0.44 | 0.83 | 0.82 | 0.93 | -0.09 | 0.47 | 0.79 | 0.83 | 0.91 |
| Romboutsia            | -0.31 | 0.18 | 0.45 | 0.37 | 0.78 | -0.24 | 0.28 | 0.46 | 0.63 | 0.89 | -0.20 | 0.39 | 0.50 | 0.78 | 0.87 | -0.19 | 0.40 | 0.51 | 0.81 | 0.87 | -0.18 | 0.43 | 0.56 | 0.83 | 0.85 |
| Roseburia             | 0.31  | 0.20 | 1.00 | 0.40 | 1.00 | 0.26  | 0.25 | 0.93 | 0.60 | 0.98 | -0.03 | 0.91 | 0.38 | 0.98 | 0.87 | -0.03 | 0.91 | 0.38 | 0.98 | 0.87 | 0.01  | 0.96 | 0.48 | 0.97 | 0.85 |
| Ruminococcus          | 0.38  | 0.02 | 0.32 | 0.12 | 0.76 | 0.24  | 0.11 | 0.39 | 0.39 | 0.89 | 0.20  | 0.20 | 0.48 | 0.61 | 0.87 | 0.20  | 0.21 | 0.48 | 0.62 | 0.87 | 0.22  | 0.18 | 0.45 | 0.58 | 0.85 |
| Sellimonas            | 0.12  | 0.62 | 0.67 | 0.80 | 0.92 | 0.07  | 0.74 | 0.79 | 0.97 | 0.97 | 0.14  | 0.55 | 0.95 | 0.87 | 0.99 | 0.14  | 0.56 | 0.96 | 0.87 | 0.99 | 0.16  | 0.48 | 0.96 | 0.83 | 0.98 |
| Senegalimassilia      | -0.27 | 0.20 | 0.20 | 0.40 | 0.76 | -0.19 | 0.32 | 0.39 | 0.65 | 0.89 | -0.11 | 0.58 | 0.48 | 0.87 | 0.87 | -0.12 | 0.56 | 0.47 | 0.87 | 0.87 | -0.11 | 0.60 | 0.49 | 0.90 | 0.85 |
| Shuttleworthia        | 1.01  | 0.00 | 0.01 | 0.01 | 0.49 | 0.70  | 0.01 | 0.01 | 0.18 | 0.58 | 0.79  | 0.00 | 0.00 | 0.12 | 0.30 | 0.78  | 0.00 | 0.00 | 0.13 | 0.30 | 0.80  | 0.00 | 0.00 | 0.11 | 0.36 |
| Slackia               | -0.06 | 0.74 | 0.84 | 0.83 | 0.95 | -0.06 | 0.73 | 0.57 | 0.97 | 0.89 | 0.01  | 0.96 | 0.81 | 0.99 | 0.93 | 0.01  | 0.97 | 0.81 | 0.98 | 0.93 | 0.02  | 0.93 | 0.91 | 0.97 | 0.97 |
| Streptococcus         | 0.26  | 0.36 | 0.99 | 0.57 | 1.00 | 0.21  | 0.44 | 0.80 | 0.73 | 0.97 | 0.10  | 0.71 | 0.29 | 0.91 | 0.87 | 0.10  | 0.71 | 0.29 | 0.91 | 0.87 | 0.06  | 0.83 | 0.21 | 0.97 | 0.83 |
| Subdoligranulum       | 0.43  | 0.05 | 0.94 | 0.20 | 1.00 | 0.35  | 0.09 | 0.88 | 0.39 | 0.98 | 0.44  | 0.04 | 0.58 | 0.37 | 0.87 | 0.44  | 0.04 | 0.59 | 0.38 | 0.87 | 0.49  | 0.02 | 0.44 | 0.29 | 0.85 |
| Sutterella            | -0.55 | 0.00 | 0.04 | 0.00 | 0.59 | -0.45 | 0.00 | 0.04 | 0.01 | 0.58 | -0.44 | 0.00 | 0.07 | 0.08 | 0.74 | -0.44 | 0.00 | 0.07 | 0.08 | 0.74 | -0.45 | 0.00 | 0.07 | 0.05 | 0.68 |
| TM7x                  | 0.01  | 0.98 | 0.72 | 0.98 | 0.92 | -0.03 | 0.91 | 0.93 | 0.99 | 0.98 | 0.11  | 0.72 | 0.66 | 0.91 | 0.88 | 0.11  | 0.71 | 0.65 | 0.91 | 0.88 | 0.13  | 0.66 | 0.69 | 0.90 | 0.89 |
| Turicibacter          | 0.14  | 0.67 | 1.00 | 0.81 | 1.00 | 0.31  | 0.31 | 0.88 | 0.65 | 0.98 | 0.54  | 0.10 | 0.54 | 0.58 | 0.87 | 0.55  | 0.10 | 0.53 | 0.57 | 0.87 | 0.56  | 0.10 | 0.47 | 0.50 | 0.85 |
| Tuzzerella            | 0.40  | 0.09 | 0.02 | 0.25 | 0.49 | 0.39  | 0.07 | 0.04 | 0.39 | 0.58 | 0.38  | 0.11 | 0.05 | 0.58 | 0.72 | 0.37  | 0.11 | 0.05 | 0.59 | 0.72 | 0.39  | 0.10 | 0.03 | 0.50 | 0.68 |
| UBA1819               | 0.13  | 0.66 | 0.68 | 0.81 | 0.92 | 0.06  | 0.84 | 0.81 | 0.99 | 0.97 | 0.19  | 0.51 | 0.61 | 0.87 | 0.87 | 0.19  | 0.52 | 0.61 | 0.87 | 0.87 | 0.27  | 0.37 | 0.49 | 0.76 | 0.85 |
| UCG_002               | 0.36  | 0.02 | 0.37 | 0.12 | 0.76 | 0.24  | 0.09 | 0.46 | 0.39 | 0.89 | 0.23  | 0.12 | 0.41 | 0.59 | 0.87 | 0.23  | 0.12 | 0.42 | 0.59 | 0.87 | 0.25  | 0.10 | 0.33 | 0.50 | 0.85 |
| UCG_003               | 0.20  | 0.26 | 0.91 | 0.46 | 0.99 | 0.13  | 0.44 | 0.58 | 0.73 | 0.89 | 0.04  | 0.81 | 0.81 | 0.98 | 0.93 | 0.04  | 0.81 | 0.82 | 0.98 | 0.93 | 0.03  | 0.88 | 0.80 | 0.97 | 0.91 |
| UCG_005               | 0.50  | 0.01 | 0.12 | 0.08 | 0.63 | 0.32  | 0.06 | 0.25 | 0.39 | 0.88 | 0.27  | 0.14 | 0.32 | 0.60 | 0.87 | 0.27  | 0.14 | 0.33 | 0.59 | 0.87 | 0.29  | 0.13 | 0.29 | 0.58 | 0.85 |
| UCG_009               | 0.19  | 0.53 | 0.55 | 0.73 | 0.85 | -0.04 | 0.88 | 0.47 | 0.99 | 0.89 | -0.13 | 0.66 | 0.35 | 0.87 | 0.87 | -0.13 | 0.66 | 0.36 | 0.88 | 0.87 | -0.14 | 0.65 | 0.34 | 0.90 | 0.85 |
| Veillonella           | -0.04 | 0.85 | 0.39 | 0.88 | 0.76 | 0.00  | 0.98 | 0.55 | 1.00 | 0.89 | -0.18 | 0.39 | 0.23 | 0.78 | 0.87 | -0.17 | 0.39 | 0.23 | 0.81 | 0.87 | -0.21 | 0.31 | 0.19 | 0.70 | 0.82 |
| Victivallis           | -0.21 | 0.32 | 0.08 | 0.55 | 0.59 | -0.28 | 0.17 | 0.12 | 0.47 | 0.79 | -0.30 | 0.16 | 0.18 | 0.60 | 0.84 | -0.31 | 0.16 | 0.18 | 0.59 | 0.86 | -0.31 | 0.16 | 0.16 | 0.58 | 0.74 |

Multivariable-adjusted regression models adjusted for:

Model 1: sequencing batch, age, race, gender, study center

Model 2: Model 1, with education

Model 3: Model 2, with physical activity, diet score, medication use, and smoking

Model 4: Model 3 with BMI

Model 5: Model 4 with hypertension and diabetes

eTable 25: Multivariable-adjusted regression coefficients, p-values, race interaction p-values, false discovery rate (FDR)-adjusted p-values for race- genera interactions with respect to PC (1st).

|                               | Model1 |         |           |      |         | Model2 |         |           |      |         | Model3 |         |           |      |         | Model4 |         |           |      |         | Model5 |         |           |      |         |
|-------------------------------|--------|---------|-----------|------|---------|--------|---------|-----------|------|---------|--------|---------|-----------|------|---------|--------|---------|-----------|------|---------|--------|---------|-----------|------|---------|
|                               | beta   | p-value | p-val int | FDR  | FDR-int | beta   | p-value | p-val int | FDR  | FDR-int | beta   | p-value | p-val int | FDR  | FDR-int | beta   | p-value | p-val int | FDR  | FDR-int | beta   | p-value | p-val int | FDR  | FDR-int |
| Acetanaerobacterium           | -0.02  | 0.91    | 0.79      | 0.94 | 0.89    | -0.02  | 0.91    | 0.74      | 0.94 | 0.88    | -0.05  | 0.81    | 0.85      | 0.94 | 0.96    | -0.05  | 0.80    | 0.87      | 0.94 | 0.96    | -0.04  | 0.84    | 0.90      | 0.99 | 1.00    |
| Acidaminococcus               | -0.09  | 0.11    | 0.17      | 0.30 | 0.62    | -0.05  | 0.32    | 0.30      | 0.65 | 0.82    | -0.01  | 0.89    | 0.15      | 1.00 | 0.74    | -0.01  | 0.91    | 0.15      | 0.99 | 0.73    | 0.00   | 0.94    | 0.14      | 1.00 | 0.72    |
| Actinomyces                   | -0.23  | 0.14    | 0.23      | 0.33 | 0.68    | -0.16  | 0.26    | 0.27      | 0.65 | 0.82    | -0.10  | 0.54    | 0.28      | 0.92 | 0.77    | -0.10  | 0.54    | 0.28      | 0.93 | 0.76    | -0.09  | 0.55    | 0.23      | 0.94 | 0.72    |
| Adlercreutzia                 | 0.12   | 0.26    | 0.33      | 0.45 | 0.71    | 0.06   | 0.54    | 0.62      | 0.80 | 0.86    | 0.05   | 0.64    | 0.58      | 0.93 | 0.85    | 0.05   | 0.65    | 0.57      | 0.93 | 0.84    | 0.05   | 0.66    | 0.55      | 0.94 | 0.87    |
| Agathobacter                  | -0.10  | 0.45    | 0.36      | 0.62 | 0.71    | -0.13  | 0.30    | 0.27      | 0.65 | 0.82    | -0.22  | 0.09    | 0.18      | 0.66 | 0.74    | -0.22  | 0.10    | 0.18      | 0.74 | 0.73    | -0.20  | 0.13    | 0.20      | 0.81 | 0.72    |
| Akkermansia                   | 0.21   | 0.00    | 0.05      | 0.04 | 0.48    | 0.14   | 0.02    | 0.11      | 0.27 | 0.82    | 0.12   | 0.08    | 0.21      | 0.66 | 0.74    | 0.12   | 0.08    | 0.21      | 0.68 | 0.73    | 0.11   | 0.11    | 0.24      | 0.81 | 0.72    |
| Alistipes                     | 0.17   | 0.15    | 0.86      | 0.34 | 0.92    | 0.10   | 0.38    | 0.85      | 0.65 | 0.93    | 0.03   | 0.76    | 0.89      | 0.93 | 0.96    | 0.04   | 0.74    | 0.93      | 0.94 | 0.97    | 0.04   | 0.74    | 1.00      | 0.94 | 1.00    |
| Allisonella                   | -0.22  | 0.05    | 0.44      | 0.19 | 0.72    | -0.04  | 0.69    | 0.70      | 0.84 | 0.88    | 0.00   | 0.99    | 1.00      | 1.00 | 1.00    | 0.00   | 0.98    | 0.93      | 0.99 | 0.97    | 0.00   | 0.99    | 0.92      | 1.00 | 0.98    |
| Anaerofilum                   | 0.34   | 0.03    | 0.21      | 0.13 | 0.68    | 0.19   | 0.19    | 0.26      | 0.59 | 0.82    | 0.19   | 0.21    | 0.25      | 0.81 | 0.74    | 0.19   | 0.23    | 0.25      | 0.82 | 0.73    | 0.18   | 0.24    | 0.27      | 0.82 | 0.72    |
| Anaerostipes                  | 0.04   | 0.79    | 0.90      | 0.85 | 0.94    | -0.03  | 0.79    | 0.99      | 0.85 | 0.99    | -0.03  | 0.82    | 0.87      | 0.94 | 0.96    | -0.03  | 0.85    | 0.82      | 0.97 | 0.95    | 0.00   | 0.97    | 0.77      | 1.00 | 0.94    |
| Anaerotruncus                 | 0.27   | 0.04    | 0.04      | 0.16 | 0.42    | 0.22   | 0.07    | 0.03      | 0.36 | 0.63    | 0.23   | 0.07    | 0.02      | 0.66 | 0.48    | 0.22   | 0.08    | 0.02      | 0.68 | 0.43    | 0.23   | 0.07    | 0.01      | 0.80 | 0.44    |
| Bacteroides                   | 0.15   | 0.43    | 0.15      | 0.62 | 0.62    | 0.09   | 0.62    | 0.15      | 0.84 | 0.82    | 0.08   | 0.66    | 0.17      | 0.93 | 0.74    | 0.10   | 0.60    | 0.16      | 0.93 | 0.73    | 0.09   | 0.61    | 0.15      | 0.94 | 0.72    |
| Barnesiella                   | 0.12   | 0.07    | 0.36      | 0.23 | 0.71    | 0.13   | 0.03    | 0.47      | 0.27 | 0.82    | 0.12   | 0.07    | 0.53      | 0.66 | 0.84    | 0.12   | 0.07    | 0.51      | 0.68 | 0.84    | 0.12   | 0.07    | 0.48      | 0.80 | 0.87    |
| Bifidobacterium               | 0.05   | 0.57    | 0.24      | 0.72 | 0.69    | 0.10   | 0.24    | 0.33      | 0.65 | 0.82    | 0.07   | 0.39    | 0.43      | 0.88 | 0.84    | 0.08   | 0.35    | 0.39      | 0.89 | 0.82    | 0.08   | 0.35    | 0.39      | 0.83 | 0.80    |
| Biflophia                     | 0.16   | 0.07    | 0.67      | 0.23 | 0.86    | 0.08   | 0.33    | 0.75      | 0.65 | 0.88    | 0.04   | 0.68    | 0.52      | 0.93 | 0.84    | 0.04   | 0.63    | 0.56      | 0.93 | 0.84    | 0.03   | 0.73    | 0.52      | 0.94 | 0.87    |
| Blautia                       | 0.18   | 0.53    | 0.45      | 0.68 | 0.72    | 0.10   | 0.71    | 0.34      | 0.84 | 0.82    | 0.17   | 0.52    | 0.32      | 0.92 | 0.78    | 0.19   | 0.49    | 0.28      | 0.93 | 0.76    | 0.29   | 0.32    | 0.21      | 0.82 | 0.72    |
| Butyrivococcus                | 0.38   | 0.05    | 0.19      | 0.19 | 0.67    | 0.16   | 0.37    | 0.31      | 0.65 | 0.82    | 0.09   | 0.63    | 0.25      | 0.92 | 0.74    | 0.10   | 0.59    | 0.24      | 0.93 | 0.73    | 0.10   | 0.60    | 0.26      | 0.94 | 0.72    |
| Butyrivimonas                 | 0.14   | 0.06    | 0.44      | 0.21 | 0.72    | 0.11   | 0.12    | 0.41      | 0.45 | 0.82    | 0.13   | 0.07    | 0.19      | 0.66 | 0.74    | 0.13   | 0.07    | 0.20      | 0.68 | 0.73    | 0.13   | 0.06    | 0.16      | 0.80 | 0.72    |
| CAG_56                        | -0.06  | 0.51    | 0.03      | 0.66 | 0.42    | -0.07  | 0.40    | 0.07      | 0.67 | 0.72    | -0.10  | 0.23    | 0.07      | 0.81 | 0.72    | -0.10  | 0.24    | 0.08      | 0.82 | 0.73    | -0.10  | 0.26    | 0.08      | 0.82 | 0.72    |
| Candidatus_Soleaferrea        | 0.31   | 0.08    | 0.02      | 0.25 | 0.42    | 0.27   | 0.09    | 0.01      | 0.43 | 0.58    | 0.27   | 0.11    | 0.01      | 0.77 | 0.45    | 0.27   | 0.11    | 0.01      | 0.78 | 0.43    | 0.29   | 0.09    | 0.01      | 0.81 | 0.44    |
| Caproiciproducens             | 0.12   | 0.42    | 0.33      | 0.62 | 0.71    | 0.08   | 0.55    | 0.51      | 0.81 | 0.84    | 0.00   | 0.99    | 0.72      | 1.00 | 0.90    | 0.00   | 0.99    | 0.72      | 0.99 | 0.91    | -0.01  | 0.95    | 0.74      | 1.00 | 0.94    |
| Christensenellaceae_R.7_group | 0.22   | 0.00    | 0.28      | 0.04 | 0.69    | 0.14   | 0.04    | 0.57      | 0.28 | 0.85    | 0.09   | 0.24    | 0.85      | 0.81 | 0.96    | 0.08   | 0.27    | 0.88      | 0.82 | 0.96    | 0.09   | 0.26    | 0.87      | 0.82 | 0.94    |
| Clostridium_sensu_stricto_1   | -0.07  | 0.49    | 0.14      | 0.65 | 0.62    | -0.03  | 0.73    | 0.19      | 0.84 | 0.82    | -0.07  | 0.46    | 0.10      | 0.91 | 0.74    | -0.07  | 0.48    | 0.10      | 0.93 | 0.73    | -0.07  | 0.46    | 0.11      | 0.89 | 0.72    |
| Colidextribacter              | -0.05  | 0.74    | 0.69      | 0.84 | 0.86    | -0.07  | 0.64    | 0.37      | 0.84 | 0.82    | -0.01  | 0.95    | 0.14      | 1.00 | 0.74    | -0.01  | 0.97    | 0.12      | 0.99 | 0.73    | 0.03   | 0.86    | 0.10      | 0.99 | 0.72    |
| Collinsella                   | -0.12  | 0.11    | 0.35      | 0.30 | 0.71    | -0.03  | 0.69    | 0.46      | 0.84 | 0.82    | -0.04  | 0.57    | 0.37      | 0.92 | 0.83    | -0.04  | 0.56    | 0.34      | 0.93 | 0.78    | -0.05  | 0.48    | 0.30      | 0.89 | 0.72    |
| Coprobacter                   | 0.12   | 0.24    | 0.50      | 0.43 | 0.76    | 0.08   | 0.36    | 0.42      | 0.65 | 0.82    | 0.04   | 0.67    | 0.41      | 0.93 | 0.84    | 0.04   | 0.70    | 0.43      | 0.93 | 0.83    | 0.03   | 0.76    | 0.48      | 0.94 | 0.87    |
| Coprococcus                   | -0.01  | 0.94    | 0.11      | 0.96 | 0.62    | 0.03   | 0.75    | 0.30      | 0.84 | 0.82    | 0.06   | 0.55    | 0.70      | 0.92 | 0.90    | 0.06   | 0.55    | 0.70      | 0.93 | 0.91    | 0.07   | 0.45    | 0.79      | 0.89 | 0.94    |
| Defluviitaleaceae_UCG.011     | 0.41   | 0.00    | 0.17      | 0.04 | 0.62    | 0.35   | 0.01    | 0.17      | 0.21 | 0.82    | 0.32   | 0.02    | 0.25      | 0.65 | 0.74    | 0.31   | 0.03    | 0.25      | 0.68 | 0.73    | 0.32   | 0.03    | 0.23      | 0.59 | 0.72    |
| Desulfovibrio                 | 0.02   | 0.82    | 0.32      | 0.87 | 0.71    | 0.03   | 0.68    | 0.26      | 0.84 | 0.82    | 0.04   | 0.62    | 0.18      | 0.92 | 0.74    | 0.03   | 0.71    | 0.20      | 0.93 | 0.73    | 0.03   | 0.68    | 0.20      | 0.94 | 0.72    |
| Dialister                     | -0.10  | 0.12    | 0.10      | 0.30 | 0.62    | -0.08  | 0.16    | 0.14      | 0.53 | 0.82    | -0.07  | 0.25    | 0.23      | 0.81 | 0.74    | -0.07  | 0.26    | 0.22      | 0.82 | 0.73    | -0.07  | 0.30    | 0.24      | 0.82 | 0.72    |
| DNF00809                      | 0.03   | 0.87    | 0.60      | 0.90 | 0.83    | 0.01   | 0.92    | 0.71      | 0.95 | 0.88    | 0.06   | 0.69    | 0.96      | 0.93 | 0.98    | 0.06   | 0.70    | 0.97      | 0.93 | 0.99    | 0.06   | 0.72    | 0.96      | 0.94 | 0.99    |
| Dorea                         | 0.03   | 0.79    | 0.61      | 0.85 | 0.83    | 0.03   | 0.73    | 0.78      | 0.84 | 0.89    | 0.06   | 0.56    | 0.55      | 0.92 | 0.84    | 0.06   | 0.54    | 0.55      | 0.93 | 0.84    | 0.05   | 0.61    | 0.60      | 0.94 | 0.88    |
| DTU089                        | 0.18   | 0.14    | 0.10      | 0.33 | 0.62    | 0.11   | 0.35    | 0.23      | 0.65 | 0.82    | 0.08   | 0.53    | 0.39      | 0.92 | 0.84    | 0.08   | 0.53    | 0.36      | 0.93 | 0.78    | 0.10   | 0.42    | 0.31      | 0.87 | 0.72    |
| Eggerthella                   | -0.05  | 0.65    | 0.89      | 0.78 | 0.94    | -0.11  | 0.30    | 0.54      | 0.65 | 0.85    | -0.02  | 0.83    | 0.95      | 0.94 | 0.98    | -0.02  | 0.86    | 0.99      | 0.97 | 0.99    | -0.02  | 0.90    | 0.96      | 1.00 | 0.99    |
| Eisenbergiella                | -0.03  | 0.80    | 0.79      | 0.85 | 0.89    | -0.03  | 0.74    | 0.86      | 0.84 | 0.93    | 0.00   | 0.97    | 0.62      | 1.00 | 0.86    | -0.01  | 0.93    | 0.57      | 0.99 | 0.84    | 0.00   | 1.00    | 0.61      | 1.00 | 0.88    |
| Erysipelatoclostridium        | 0.05   | 0.66    | 0.14      | 0.78 | 0.62    | 0.03   | 0.77    | 0.21      | 0.85 | 0.82    | 0.08   | 0.51    | 0.19      | 0.92 | 0.74    | 0.07   | 0.53    | 0.17      | 0.93 | 0.73    | 0.08   | 0.48    | 0.15      | 0.89 | 0.72    |
| Erysipelotrichaceae_UCG.003   | 0.09   | 0.33    | 0.81      | 0.52 | 0.89    | 0.09   | 0.31    | 0.65      | 0.65 | 0.88    | 0.00   | 0.96    | 0.79      | 1.00 | 0.96    | 0.00   | 0.98    | 0.78      | 0.99 | 0.95    | 0.00   | 0.96    | 0.83      | 1.00 | 0.94    |
| Escherichia_Shigella          | -0.07  | 0.39    | 0.96      | 0.61 | 0.97    | 0.02   | 0.82    | 0.51      | 0.87 | 0.84    | 0.03   | 0.73    | 0.62      | 0.93 | 0.86    | 0.03   | 0.70    | 0.60      | 0.93 | 0.85    | 0.03   | 0.73    | 0.60      | 0.94 | 0.88    |
| Faecalibacterium              | 0.24   | 0.11    | 0.77      | 0.30 | 0.88    | 0.11   | 0.45    | 0.70      | 0.72 | 0.88    | 0.04   | 0.78    | 0.51      | 0.93 | 0.84    | 0.05   | 0.75    | 0.54      | 0.94 | 0.84    | 0.07   | 0.64    | 0.64      | 0.94 | 0.90    |
| Family_XIII_AD3011_group      | 0.30   | 0.01    | 0.30      | 0.07 | 0.70    | 0.19   | 0.08    | 0.41      | 0.40 | 0.82    | 0.16   | 0.17    | 0.29      | 0.81 | 0.77    | 0.15   | 0.20    | 0.30      | 0.82 | 0.77    | 0.15   | 0.21    | 0.31      | 0.82 | 0.72    |
| Family_XIII_UCG.001           | 0.24   | 0.10    | 0.57      | 0.28 | 0.81    | 0.19   | 0.15    | 0.47      | 0.53 | 0.82    | 0.13   | 0.37    | 0.66      | 0.88 | 0.87    | 0.12   | 0.41    | 0.67      | 0.92 | 0.89    | 0.12   | 0.41    | 0.68      | 0.87 | 0.93    |
| FD2005                        | -0.20  | 0.12    | 0.13      | 0.30 | 0.62    | -0.07  | 0.56    | 0.57      | 0.81 | 0.85    | -0.09  | 0.50    | 0.46      | 0.92 | 0.84    | -0.09  | 0.49    | 0.43      | 0.93 | 0.83    | -0.08  | 0.55    | 0.52      | 0.94 | 0.87    |
| Flavonifractor                | -0.05  | 0.65    | 0.36      | 0.78 | 0.71    | -0.07  | 0.48    | 0.55      | 0.75 | 0.85    | -0.01  | 0.90    | 0.46      | 1.00 | 0.84    | -0.01  | 0.94    | 0.43      | 0.99 | 0.83    | 0.01   | 0.96    | 0.39      | 1.00 | 0.80    |
| Fournierella                  | 0.11   | 0.44    | 0.53      | 0.62 | 0.78    | 0.06   | 0.66    | 0.73      | 0.84 | 0.88    | 0.04   | 0.76    | 0.65      | 0.93 | 0.87    | 0.03   | 0.81    | 0.67      | 0.95 | 0.89    | 0.05   | 0.69    | 0.60      | 0.94 | 0.88    |
| Frisingicoccus                | 0.19   | 0.07    | 0.04      | 0.23 | 0.43    | 0.14   | 0.15    | 0.05      | 0.53 | 0.65    | 0.11   | 0.30    | 0.07      | 0.82 | 0.72    | 0.10   | 0.31    | 0.07      | 0.85 | 0.73    | 0.10   | 0.32    | 0.08      | 0.83 | 0.72    |
| Fusicatenaibacter             | 0.00   | 0.98    | 0.36      | 0.98 | 0.71    | -0.04  | 0.65    | 0.36      | 0.84 | 0.82    | -0.10  | 0.29    | 0.25      | 0.82 | 0.74    | -0.09  | 0.32    | 0.25      | 0.85 | 0.73    | -0.11  | 0.25    | 0.21      | 0.82 | 0.72    |
| Fusobacterium                 | -0.16  | 0.16    | 0.31      | 0.34 | 0.71    | -0.08  | 0.42    | 0.44      | 0.68 | 0.82    | 0.00   | 1.00    | 0.53      | 1.00 | 0.84    | -0.01  | 0.96    | 0.53      | 0.99 | 0.84    | 0.00   | 0.97    | 0.68      | 1.00 | 0.93    |
| GCA_900066575                 | 0.28   | 0.03    | 0.28      | 0.15 | 0.69    | 0.19   | 0.12    | 0.25      | 0.45 | 0.82    | 0.11   | 0.40    | 0.41      | 0.90 | 0.84    | 0.10   | 0.44    | 0.41      | 0.93 | 0.83    | 0.12   | 0.38    | 0.30      | 0.86 | 0.72    |
| Gordonibacter                 | 0.30   | 0.03    | 0.07      | 0.15 | 0.54    | 0.16   | 0.21    | 0.28      | 0.64 | 0.82    | 0.16   | 0.24    | 0.23      | 0.81 | 0.74    | 0.16   | 0.26    | 0.22      | 0.82 | 0.73    | 0.15   | 0.29    | 0.25      | 0.82 | 0.72    |
| Granulicatella                | -0.12  | 0.45    | 0.45      | 0.62 | 0.72    | -0.05  | 0.70    | 0.76      | 0.84 | 0.88    | -0.06  | 0.67    | 0.54      | 0.93 | 0.84    | -0.05  | 0.72    | 0.58      | 0.93 | 0.84    | -0.04  | 0.79    | 0.58      | 0.95 | 0.88    |

|                       |       |      |      |      |      |       |      |      |      |      |       |      |      |      |      |       |      |      |      |      |       |      |      |      |      |
|-----------------------|-------|------|------|------|------|-------|------|------|------|------|-------|------|------|------|------|-------|------|------|------|------|-------|------|------|------|------|
| Monoglobus            | 0.26  | 0.01 | 0.75 | 0.07 | 0.88 | 0.18  | 0.06 | 0.42 | 0.35 | 0.82 | 0.05  | 0.60 | 0.07 | 0.92 | 0.72 | 0.05  | 0.60 | 0.07 | 0.93 | 0.73 | 0.05  | 0.61 | 0.06 | 0.94 | 0.72 |
| Moryella              | 0.15  | 0.33 | 0.54 | 0.52 | 0.78 | 0.06  | 0.67 | 0.50 | 0.84 | 0.84 | -0.04 | 0.79 | 0.40 | 0.93 | 0.84 | -0.04 | 0.78 | 0.39 | 0.94 | 0.82 | -0.04 | 0.79 | 0.38 | 0.95 | 0.80 |
| Negativibacillus      | 0.04  | 0.67 | 0.13 | 0.78 | 0.62 | 0.08  | 0.35 | 0.04 | 0.65 | 0.65 | 0.10  | 0.29 | 0.03 | 0.82 | 0.63 | 0.09  | 0.31 | 0.04 | 0.85 | 0.63 | 0.09  | 0.31 | 0.03 | 0.82 | 0.59 |
| NK4A214_group         | 0.13  | 0.10 | 0.63 | 0.28 | 0.83 | 0.08  | 0.25 | 0.61 | 0.65 | 0.86 | 0.03  | 0.71 | 0.77 | 0.93 | 0.95 | 0.02  | 0.78 | 0.82 | 0.94 | 0.95 | 0.03  | 0.74 | 0.83 | 0.94 | 0.94 |
| Odoribacter           | 0.20  | 0.00 | 0.07 | 0.04 | 0.54 | 0.13  | 0.04 | 0.29 | 0.28 | 0.82 | 0.11  | 0.12 | 0.21 | 0.77 | 0.74 | 0.11  | 0.13 | 0.22 | 0.82 | 0.73 | 0.11  | 0.12 | 0.18 | 0.81 | 0.72 |
| Oscillibacter         | 0.24  | 0.05 | 0.60 | 0.19 | 0.83 | 0.22  | 0.05 | 0.38 | 0.35 | 0.82 | 0.23  | 0.06 | 0.25 | 0.66 | 0.74 | 0.23  | 0.07 | 0.25 | 0.68 | 0.73 | 0.23  | 0.08 | 0.26 | 0.80 | 0.72 |
| Oscillospira          | 0.16  | 0.33 | 0.46 | 0.52 | 0.72 | 0.12  | 0.41 | 0.73 | 0.67 | 0.88 | 0.12  | 0.42 | 0.87 | 0.90 | 0.96 | 0.13  | 0.42 | 0.83 | 0.92 | 0.96 | 0.17  | 0.30 | 0.71 | 0.82 | 0.94 |
| Oxalobacter           | 0.17  | 0.18 | 0.51 | 0.38 | 0.76 | 0.06  | 0.59 | 0.60 | 0.82 | 0.86 | 0.00  | 0.97 | 0.53 | 1.00 | 0.84 | -0.01 | 0.95 | 0.51 | 0.99 | 0.84 | -0.02 | 0.85 | 0.42 | 0.99 | 0.84 |
| Paludicola            | 0.34  | 0.01 | 0.17 | 0.07 | 0.62 | 0.27  | 0.03 | 0.08 | 0.27 | 0.77 | 0.18  | 0.18 | 0.15 | 0.81 | 0.74 | 0.17  | 0.21 | 0.16 | 0.82 | 0.73 | 0.17  | 0.23 | 0.21 | 0.82 | 0.72 |
| Parabacteroides       | 0.11  | 0.22 | 0.22 | 0.42 | 0.68 | 0.11  | 0.19 | 0.56 | 0.59 | 0.85 | 0.09  | 0.30 | 0.86 | 0.82 | 0.96 | 0.10  | 0.28 | 0.82 | 0.82 | 0.95 | 0.11  | 0.24 | 0.75 | 0.82 | 0.94 |
| Paraprevotella        | -0.08 | 0.23 | 0.41 | 0.42 | 0.72 | -0.07 | 0.27 | 0.25 | 0.65 | 0.82 | -0.08 | 0.23 | 0.30 | 0.81 | 0.77 | -0.08 | 0.21 | 0.28 | 0.82 | 0.76 | -0.08 | 0.23 | 0.30 | 0.82 | 0.72 |
| Parasutterella        | 0.21  | 0.00 | 0.26 | 0.04 | 0.69 | 0.18  | 0.00 | 0.34 | 0.21 | 0.82 | 0.13  | 0.07 | 0.49 | 0.66 | 0.84 | 0.13  | 0.07 | 0.49 | 0.68 | 0.84 | 0.12  | 0.08 | 0.47 | 0.80 | 0.87 |
| Peptococcus           | 0.38  | 0.01 | 0.02 | 0.06 | 0.42 | 0.27  | 0.04 | 0.02 | 0.28 | 0.63 | 0.20  | 0.15 | 0.04 | 0.81 | 0.63 | 0.20  | 0.16 | 0.04 | 0.82 | 0.63 | 0.19  | 0.18 | 0.05 | 0.82 | 0.70 |
| Phascolarctobacterium | 0.16  | 0.01 | 0.07 | 0.07 | 0.54 | -0.16 | 0.01 | 0.09 | 0.21 | 0.82 | 0.16  | 0.01 | 0.12 | 0.65 | 0.74 | 0.16  | 0.01 | 0.12 | 0.68 | 0.73 | 0.16  | 0.01 | 0.11 | 0.59 | 0.72 |
| Phocaea               | -0.20 | 0.20 | 0.65 | 0.39 | 0.84 | -0.26 | 0.06 | 0.45 | 0.36 | 0.82 | -0.27 | 0.07 | 0.56 | 0.66 | 0.84 | -0.26 | 0.08 | 0.57 | 0.68 | 0.84 | -0.24 | 0.11 | 0.69 | 0.81 | 0.93 |
| Prevotella            | -0.08 | 0.18 | 0.77 | 0.38 | 0.88 | -0.05 | 0.29 | 0.89 | 0.65 | 0.95 | -0.04 | 0.42 | 0.90 | 0.90 | 0.96 | -0.05 | 0.39 | 0.96 | 0.92 | 0.99 | -0.04 | 0.47 | 0.87 | 0.89 | 0.94 |
| Romboutsia            | -0.09 | 0.41 | 0.16 | 0.62 | 0.62 | -0.05 | 0.62 | 0.15 | 0.84 | 0.82 | -0.06 | 0.58 | 0.21 | 0.92 | 0.74 | -0.05 | 0.64 | 0.24 | 0.93 | 0.73 | -0.04 | 0.69 | 0.28 | 0.94 | 0.72 |
| Roseburia             | 0.09  | 0.43 | 0.74 | 0.62 | 0.88 | 0.07  | 0.54 | 0.79 | 0.80 | 0.89 | -0.06 | 0.61 | 0.33 | 0.92 | 0.78 | -0.06 | 0.62 | 0.33 | 0.93 | 0.78 | -0.03 | 0.81 | 0.44 | 0.96 | 0.85 |
| Ruminococcus          | 0.18  | 0.02 | 0.42 | 0.09 | 0.72 | 0.11  | 0.11 | 0.52 | 0.45 | 0.84 | 0.06  | 0.43 | 0.75 | 0.90 | 0.93 | 0.06  | 0.45 | 0.76 | 0.93 | 0.93 | 0.06  | 0.47 | 0.82 | 0.89 | 0.94 |
| Sellimonas            | 0.05  | 0.67 | 0.15 | 0.78 | 0.62 | 0.03  | 0.80 | 0.18 | 0.86 | 0.82 | 0.00  | 0.99 | 0.16 | 1.00 | 0.74 | -0.01 | 0.95 | 0.14 | 0.99 | 0.73 | -0.01 | 0.93 | 0.13 | 1.00 | 0.72 |
| Senegalimassilia      | -0.06 | 0.51 | 0.26 | 0.66 | 0.69 | -0.03 | 0.77 | 0.50 | 0.85 | 0.84 | -0.05 | 0.62 | 0.44 | 0.92 | 0.84 | -0.05 | 0.58 | 0.40 | 0.93 | 0.82 | -0.05 | 0.63 | 0.42 | 0.94 | 0.84 |
| Shuttleworthia        | 0.45  | 0.00 | 0.01 | 0.03 | 0.42 | 0.30  | 0.02 | 0.02 | 0.27 | 0.63 | 0.31  | 0.02 | 0.01 | 0.65 | 0.45 | 0.30  | 0.02 | 0.01 | 0.68 | 0.43 | 0.29  | 0.03 | 0.01 | 0.59 | 0.44 |
| Slackia               | -0.03 | 0.74 | 0.54 | 0.84 | 0.78 | -0.03 | 0.72 | 0.79 | 0.84 | 0.89 | -0.02 | 0.79 | 0.65 | 0.93 | 0.87 | -0.02 | 0.78 | 0.66 | 0.94 | 0.89 | -0.03 | 0.74 | 0.61 | 0.94 | 0.88 |
| Streptococcus         | 0.18  | 0.19 | 0.33 | 0.38 | 0.71 | 0.15  | 0.23 | 0.43 | 0.65 | 0.82 | 0.14  | 0.28 | 0.82 | 0.82 | 0.96 | 0.15  | 0.26 | 0.72 | 0.82 | 0.91 | 0.14  | 0.29 | 0.85 | 0.82 | 0.94 |
| Subdoligranulum       | 0.29  | 0.01 | 0.46 | 0.05 | 0.72 | 0.25  | 0.01 | 0.38 | 0.22 | 0.82 | 0.21  | 0.04 | 0.33 | 0.66 | 0.78 | 0.21  | 0.04 | 0.34 | 0.68 | 0.78 | 0.23  | 0.03 | 0.26 | 0.59 | 0.72 |
| Sutterella            | -0.18 | 0.00 | 0.17 | 0.04 | 0.62 | -0.13 | 0.02 | 0.17 | 0.27 | 0.82 | -0.13 | 0.04 | 0.19 | 0.66 | 0.74 | -0.13 | 0.04 | 0.18 | 0.68 | 0.73 | -0.12 | 0.05 | 0.21 | 0.80 | 0.72 |
| TM7x                  | -0.11 | 0.43 | 0.39 | 0.62 | 0.72 | -0.13 | 0.31 | 0.68 | 0.65 | 0.88 | -0.07 | 0.61 | 0.92 | 0.92 | 0.96 | -0.07 | 0.63 | 0.96 | 0.93 | 0.99 | -0.07 | 0.63 | 0.86 | 0.94 | 0.94 |
| Turicibacter          | 0.04  | 0.79 | 0.27 | 0.85 | 0.69 | 0.13  | 0.37 | 0.31 | 0.65 | 0.82 | 0.19  | 0.22 | 0.52 | 0.81 | 0.84 | 0.20  | 0.20 | 0.56 | 0.82 | 0.84 | 0.20  | 0.21 | 0.62 | 0.82 | 0.89 |
| Tuzzerella            | 0.14  | 0.19 | 0.01 | 0.38 | 0.42 | 0.14  | 0.17 | 0.02 | 0.54 | 0.63 | 0.11  | 0.31 | 0.05 | 0.82 | 0.68 | 0.11  | 0.31 | 0.05 | 0.85 | 0.69 | 0.11  | 0.34 | 0.05 | 0.83 | 0.70 |
| UBA1819               | 0.16  | 0.25 | 0.20 | 0.44 | 0.68 | 0.12  | 0.34 | 0.25 | 0.65 | 0.82 | 0.18  | 0.18 | 0.14 | 0.81 | 0.74 | 0.17  | 0.21 | 0.13 | 0.82 | 0.73 | 0.19  | 0.18 | 0.12 | 0.82 | 0.72 |
| UCG_002               | 0.17  | 0.02 | 0.23 | 0.09 | 0.68 | 0.11  | 0.11 | 0.28 | 0.45 | 0.82 | 0.06  | 0.38 | 0.29 | 0.88 | 0.77 | 0.06  | 0.42 | 0.30 | 0.92 | 0.77 | 0.07  | 0.35 | 0.24 | 0.83 | 0.72 |
| UCG_003               | 0.12  | 0.14 | 0.95 | 0.33 | 0.97 | 0.09  | 0.27 | 0.59 | 0.65 | 0.86 | 0.04  | 0.63 | 0.65 | 0.92 | 0.87 | 0.04  | 0.64 | 0.67 | 0.93 | 0.89 | 0.03  | 0.72 | 0.69 | 0.94 | 0.93 |
| UCG_005               | 0.27  | 0.00 | 0.10 | 0.04 | 0.62 | 0.18  | 0.02 | 0.23 | 0.27 | 0.82 | 0.12  | 0.18 | 0.34 | 0.81 | 0.78 | 0.11  | 0.21 | 0.35 | 0.82 | 0.78 | 0.12  | 0.20 | 0.35 | 0.82 | 0.79 |
| UCG_009               | 0.11  | 0.45 | 0.85 | 0.62 | 0.92 | -0.01 | 0.93 | 0.76 | 0.95 | 0.88 | -0.12 | 0.38 | 0.48 | 0.88 | 0.84 | -0.12 | 0.40 | 0.52 | 0.92 | 0.84 | -0.12 | 0.41 | 0.50 | 0.87 | 0.87 |
| Veillonella           | -0.01 | 0.96 | 0.28 | 0.96 | 0.69 | 0.01  | 0.89 | 0.42 | 0.93 | 0.82 | -0.05 | 0.62 | 0.19 | 0.92 | 0.74 | -0.04 | 0.67 | 0.22 | 0.93 | 0.73 | -0.04 | 0.69 | 0.21 | 0.94 | 0.72 |

Multivariable-adjusted regression models adjusted for:

Model 1: sequencing batch, age, race, gender, study center

Model 2: Model 1, with education

Model 3: Model 2, with physical activity, diet score, medication use, and smoking

Model 4: Model 3 with BMI

Model 5: Model 4 with hypertension and diabetes



eTable 26: Multivariable-adjusted regression coefficients, p-values, and false discovery rate (FDR)-adjusted p-values for genera among Black participants with respect to DSST.

|                               | Model1 |         |      | Model2 |         |      | Model3 |         |      | Model4 |         |      | Model5 |         |      |
|-------------------------------|--------|---------|------|--------|---------|------|--------|---------|------|--------|---------|------|--------|---------|------|
|                               | beta   | p-value | FDR  | beta   | p-value | FDR  | beta   | p-value | FDR  | beta   | p-value | FDR  | beta   | p-value | FDR  |
| Acetanaerobacterium           | 0.13   | 0.95    | 0.96 | 0.16   | 0.93    | 0.97 | -0.13  | 0.95    | 0.98 | -0.08  | 0.97    | 0.98 | -0.31  | 0.87    | 0.93 |
| Acidaminococcus               | -0.19  | 0.74    | 0.85 | 0.17   | 0.76    | 0.88 | 0.61   | 0.31    | 0.71 | 0.57   | 0.33    | 0.68 | 0.59   | 0.33    | 0.65 |
| Actinomyces                   | -2.86  | 0.06    | 0.18 | -2.24  | 0.12    | 0.39 | -1.73  | 0.26    | 0.71 | -1.70  | 0.27    | 0.68 | -1.46  | 0.36    | 0.65 |
| Adlercreutzia                 | 2.29   | 0.03    | 0.12 | 1.83   | 0.06    | 0.30 | 2.07   | 0.04    | 0.33 | 2.10   | 0.04    | 0.29 | 2.08   | 0.05    | 0.31 |
| Agathobacter                  | 0.29   | 0.82    | 0.88 | 0.05   | 0.97    | 0.97 | -0.49  | 0.70    | 0.89 | -0.59  | 0.64    | 0.90 | -0.44  | 0.74    | 0.89 |
| Akkermansia                   | 2.08   | 0.00    | 0.03 | 1.51   | 0.02    | 0.16 | 1.58   | 0.02    | 0.23 | 1.59   | 0.02    | 0.21 | 1.72   | 0.01    | 0.16 |
| Alistipes                     | 1.67   | 0.15    | 0.35 | 1.08   | 0.33    | 0.61 | 0.66   | 0.55    | 0.84 | 0.65   | 0.56    | 0.84 | 0.66   | 0.55    | 0.77 |
| Allisonella                   | -2.44  | 0.03    | 0.12 | -0.76  | 0.49    | 0.74 | -0.25  | 0.83    | 0.96 | -0.26  | 0.83    | 0.95 | -0.25  | 0.83    | 0.93 |
| Anaerofilum                   | 3.78   | 0.01    | 0.07 | 2.42   | 0.10    | 0.38 | 2.62   | 0.08    | 0.53 | 2.75   | 0.07    | 0.45 | 2.95   | 0.05    | 0.31 |
| Anaerostipes                  | 1.40   | 0.33    | 0.60 | 0.75   | 0.58    | 0.78 | 1.37   | 0.33    | 0.71 | 1.25   | 0.38    | 0.68 | 1.35   | 0.35    | 0.65 |
| Anaerotruncus                 | 3.88   | 0.00    | 0.03 | 3.38   | 0.01    | 0.10 | 2.90   | 0.02    | 0.23 | 3.08   | 0.02    | 0.20 | 3.27   | 0.01    | 0.15 |
| Atopobium                     | 1.94   | 0.39    | 0.63 | 2.76   | 0.19    | 0.52 | 2.15   | 0.34    | 0.71 | 1.98   | 0.38    | 0.68 | 2.67   | 0.25    | 0.64 |
| Bacteroides                   | -1.49  | 0.44    | 0.67 | -1.99  | 0.27    | 0.60 | -1.72  | 0.34    | 0.71 | -1.92  | 0.29    | 0.68 | -2.05  | 0.26    | 0.64 |
| Barnesiella                   | 1.90   | 0.00    | 0.04 | 2.00   | 0.00    | 0.05 | 1.75   | 0.01    | 0.18 | 1.77   | 0.01    | 0.14 | 1.85   | 0.01    | 0.11 |
| Bifidobacterium               | 0.31   | 0.73    | 0.85 | 0.69   | 0.41    | 0.66 | 0.61   | 0.47    | 0.78 | 0.53   | 0.54    | 0.84 | 0.63   | 0.47    | 0.74 |
| Bilophila                     | 0.24   | 0.78    | 0.85 | -0.49  | 0.55    | 0.76 | -1.13  | 0.18    | 0.59 | -1.20  | 0.15    | 0.61 | -1.16  | 0.17    | 0.61 |
| Blautia                       | 5.44   | 0.05    | 0.16 | 4.87   | 0.06    | 0.30 | 6.06   | 0.03    | 0.24 | 5.93   | 0.03    | 0.27 | 6.79   | 0.02    | 0.20 |
| Butyricoccus                  | 4.75   | 0.01    | 0.07 | 2.82   | 0.12    | 0.39 | 2.49   | 0.18    | 0.59 | 2.41   | 0.19    | 0.61 | 2.75   | 0.14    | 0.58 |
| Butyrivimonas                 | 0.50   | 0.51    | 0.73 | 0.16   | 0.82    | 0.91 | 0.29   | 0.70    | 0.89 | 0.30   | 0.68    | 0.92 | 0.32   | 0.67    | 0.86 |
| CAG.56                        | -0.76  | 0.38    | 0.61 | -0.84  | 0.30    | 0.60 | -1.66  | 0.05    | 0.33 | -1.73  | 0.04    | 0.29 | -1.58  | 0.06    | 0.33 |
| Candidatus_Soleaferrea        | 5.83   | 0.00    | 0.02 | 5.43   | 0.00    | 0.05 | 4.83   | 0.00    | 0.16 | 4.84   | 0.00    | 0.12 | 4.89   | 0.00    | 0.11 |
| Caproiciproducens             | 1.60   | 0.29    | 0.56 | 1.18   | 0.40    | 0.66 | 0.80   | 0.59    | 0.88 | 0.84   | 0.57    | 0.84 | 1.09   | 0.47    | 0.74 |
| Catenibacterium               | 0.29   | 0.72    | 0.85 | 0.52   | 0.49    | 0.74 | 0.21   | 0.79    | 0.94 | 0.17   | 0.83    | 0.95 | 0.21   | 0.80    | 0.93 |
| Christensenellaceae_R.7_group | 2.40   | 0.00    | 0.02 | 1.67   | 0.02    | 0.16 | 1.14   | 0.12    | 0.59 | 1.23   | 0.09    | 0.51 | 1.51   | 0.04    | 0.31 |
| Clostridium_sensu_stricto_1   | 0.50   | 0.61    | 0.79 | 0.83   | 0.37    | 0.66 | 0.03   | 0.97    | 0.98 | -0.02  | 0.98    | 0.98 | 0.07   | 0.94    | 0.97 |
| Colidextribacter              | -0.73  | 0.66    | 0.82 | -1.02  | 0.51    | 0.74 | 0.21   | 0.89    | 0.96 | 0.22   | 0.89    | 0.97 | 0.57   | 0.73    | 0.89 |
| Collinsella                   | -1.80  | 0.02    | 0.09 | -1.00  | 0.18    | 0.51 | -0.74  | 0.33    | 0.71 | -0.74  | 0.33    | 0.68 | -0.67  | 0.39    | 0.68 |
| Coprobacter                   | 0.57   | 0.56    | 0.76 | 0.20   | 0.83    | 0.91 | -0.43  | 0.66    | 0.88 | -0.35  | 0.71    | 0.93 | -0.41  | 0.67    | 0.86 |
| Coprococcus                   | 0.60   | 0.53    | 0.74 | 0.90   | 0.32    | 0.61 | 0.95   | 0.30    | 0.71 | 0.92   | 0.32    | 0.68 | 0.98   | 0.29    | 0.64 |
| Defluviitaleaceae_UCG.011     | 4.34   | 0.00    | 0.03 | 3.76   | 0.00    | 0.10 | 3.11   | 0.03    | 0.24 | 3.26   | 0.02    | 0.21 | 3.33   | 0.02    | 0.19 |
| Desulfovibrio                 | 0.79   | 0.30    | 0.56 | 0.82   | 0.25    | 0.60 | 1.00   | 0.18    | 0.59 | 1.11   | 0.14    | 0.58 | 1.08   | 0.16    | 0.59 |
| Dialister                     | -0.06  | 0.92    | 0.96 | 0.12   | 0.83    | 0.91 | 0.70   | 0.25    | 0.70 | 0.69   | 0.26    | 0.68 | 0.77   | 0.22    | 0.64 |
| DNF00809                      | 1.48   | 0.36    | 0.60 | 1.33   | 0.38    | 0.66 | 1.34   | 0.39    | 0.71 | 1.39   | 0.37    | 0.68 | 1.42   | 0.37    | 0.65 |
| Dorea                         | -0.02  | 0.99    | 0.99 | 0.01   | 0.99    | 0.99 | 0.47   | 0.64    | 0.88 | 0.44   | 0.67    | 0.91 | 0.48   | 0.64    | 0.85 |
| DTU089                        | 3.44   | 0.01    | 0.05 | 2.74   | 0.02    | 0.16 | 2.88   | 0.02    | 0.23 | 2.91   | 0.02    | 0.20 | 3.00   | 0.02    | 0.16 |
| Eggerthella                   | 0.75   | 0.53    | 0.74 | 0.21   | 0.85    | 0.92 | 0.84   | 0.48    | 0.78 | 0.83   | 0.48    | 0.80 | 0.84   | 0.48    | 0.74 |
| Eisenbergiella                | 0.73   | 0.55    | 0.75 | 0.55   | 0.63    | 0.81 | 1.29   | 0.27    | 0.71 | 1.40   | 0.23    | 0.67 | 1.33   | 0.26    | 0.64 |
| Enterorhabdus                 | 1.91   | 0.14    | 0.32 | 1.59   | 0.19    | 0.52 | 1.16   | 0.37    | 0.71 | 1.18   | 0.37    | 0.68 | 1.45   | 0.28    | 0.64 |
| Erysipelatoclostridium        | 1.25   | 0.35    | 0.60 | 0.98   | 0.43    | 0.68 | 1.46   | 0.25    | 0.70 | 1.51   | 0.23    | 0.67 | 1.39   | 0.28    | 0.64 |
| Erysipelotrichaceae_UCG.003   | 0.93   | 0.31    | 0.56 | 0.96   | 0.26    | 0.60 | 0.42   | 0.63    | 0.88 | 0.45   | 0.61    | 0.88 | 0.65   | 0.47    | 0.74 |
| Escherichia_Shigella          | 0.37   | 0.67    | 0.82 | 1.18   | 0.15    | 0.46 | 1.20   | 0.16    | 0.59 | 1.15   | 0.18    | 0.61 | 1.03   | 0.25    | 0.64 |
| Faecalibacterium              | 2.50   | 0.10    | 0.25 | 1.33   | 0.35    | 0.64 | 0.60   | 0.68    | 0.89 | 0.50   | 0.73    | 0.93 | 0.81   | 0.58    | 0.79 |
| Family_XIII_AD3011_group      | 3.50   | 0.00    | 0.03 | 2.46   | 0.03    | 0.17 | 2.13   | 0.07    | 0.49 | 2.28   | 0.06    | 0.38 | 2.46   | 0.04    | 0.31 |
| Family_XIII_UCG.001           | 2.96   | 0.04    | 0.14 | 2.64   | 0.05    | 0.29 | 1.29   | 0.36    | 0.71 | 1.42   | 0.32    | 0.68 | 1.41   | 0.33    | 0.65 |
| FD2005                        | -0.35  | 0.78    | 0.85 | 0.83   | 0.50    | 0.74 | 0.79   | 0.54    | 0.84 | 0.79   | 0.54    | 0.84 | 0.88   | 0.50    | 0.74 |
| Flavonifractor                | -0.32  | 0.79    | 0.85 | -0.53  | 0.64    | 0.81 | 0.36   | 0.77    | 0.94 | 0.34   | 0.77    | 0.95 | 0.43   | 0.73    | 0.89 |
| Frisingicoccus                | 0.52   | 0.61    | 0.79 | 0.08   | 0.93    | 0.97 | 0.14   | 0.89    | 0.96 | 0.22   | 0.83    | 0.95 | 0.33   | 0.75    | 0.89 |
| Fusicatenibacter              | 0.48   | 0.60    | 0.79 | 0.20   | 0.82    | 0.91 | 0.15   | 0.87    | 0.96 | 0.07   | 0.94    | 0.98 | 0.24   | 0.80    | 0.93 |
| Fusobacterium                 | -2.74  | 0.03    | 0.12 | -1.87  | 0.12    | 0.39 | -1.08  | 0.39    | 0.71 | -1.01  | 0.42    | 0.74 | -1.32  | 0.30    | 0.64 |
| GCA.900066575                 | 2.06   | 0.12    | 0.30 | 1.09   | 0.39    | 0.66 | -0.17  | 0.89    | 0.96 | -0.07  | 0.96    | 0.98 | 0.24   | 0.86    | 0.93 |
| Gordonibacter                 | 2.58   | 0.07    | 0.19 | 1.43   | 0.29    | 0.60 | 1.25   | 0.36    | 0.71 | 1.44   | 0.30    | 0.68 | 1.42   | 0.31    | 0.64 |
| Granulicatella                | -2.63  | 0.09    | 0.22 | -1.94  | 0.18    | 0.51 | -2.33  | 0.12    | 0.59 | -2.44  | 0.11    | 0.53 | -2.14  | 0.16    | 0.59 |
| Haemophilus                   | 1.21   | 0.19    | 0.39 | 0.92   | 0.29    | 0.60 | 0.45   | 0.62    | 0.88 | 0.43   | 0.64    | 0.90 | 0.73   | 0.44    | 0.73 |
| Harryflintia                  | 0.96   | 0.50    | 0.73 | 0.75   | 0.57    | 0.78 | 0.35   | 0.80    | 0.95 | 0.47   | 0.74    | 0.94 | 0.64   | 0.66    | 0.86 |

|                               |       |      |      |       |      |      |       |      |      |       |      |      |       |      |      |
|-------------------------------|-------|------|------|-------|------|------|-------|------|------|-------|------|------|-------|------|------|
| Holdemanella                  | -0.07 | 0.94 | 0.96 | 0.28  | 0.74 | 0.88 | 0.94  | 0.30 | 0.71 | 0.93  | 0.30 | 0.68 | 0.73  | 0.43 | 0.73 |
| Holdemania                    | 2.02  | 0.42 | 0.64 | 1.96  | 0.40 | 0.66 | 1.61  | 0.51 | 0.82 | 1.75  | 0.47 | 0.79 | 1.67  | 0.50 | 0.74 |
| Howardella                    | 0.34  | 0.78 | 0.85 | 0.14  | 0.91 | 0.97 | -0.15 | 0.90 | 0.96 | -0.04 | 0.98 | 0.98 | 0.05  | 0.97 | 0.97 |
| Hungatella                    | -0.46 | 0.70 | 0.84 | -0.45 | 0.69 | 0.85 | 0.21  | 0.86 | 0.96 | 0.19  | 0.87 | 0.97 | 0.22  | 0.85 | 0.93 |
| Hydrogenoanaerobacterium      | 2.70  | 0.05 | 0.15 | 1.23  | 0.35 | 0.64 | 1.18  | 0.38 | 0.71 | 1.39  | 0.31 | 0.68 | 1.61  | 0.25 | 0.64 |
| Incertae_Sedis                | 5.00  | 0.01 | 0.05 | 4.61  | 0.01 | 0.11 | 4.71  | 0.01 | 0.18 | 4.68  | 0.01 | 0.14 | 4.73  | 0.01 | 0.14 |
| Intestinibacter               | 1.18  | 0.34 | 0.60 | 1.26  | 0.28 | 0.60 | 1.55  | 0.20 | 0.63 | 1.40  | 0.25 | 0.68 | 1.49  | 0.23 | 0.64 |
| Intestinimonas                | 3.32  | 0.00 | 0.03 | 2.33  | 0.02 | 0.16 | 1.55  | 0.16 | 0.59 | 1.64  | 0.14 | 0.58 | 1.64  | 0.14 | 0.58 |
| Lachnoclostridium             | -5.76 | 0.01 | 0.07 | -4.00 | 0.06 | 0.30 | -2.74 | 0.21 | 0.65 | -2.89 | 0.19 | 0.61 | -3.17 | 0.15 | 0.59 |
| Lachnospira                   | 2.10  | 0.04 | 0.13 | 1.20  | 0.21 | 0.54 | -0.08 | 0.94 | 0.98 | -0.20 | 0.84 | 0.95 | -0.04 | 0.97 | 0.97 |
| Lachnospiraceae_FCS020_group  | 4.84  | 0.00 | 0.01 | 3.82  | 0.00 | 0.05 | 3.93  | 0.00 | 0.10 | 3.90  | 0.00 | 0.11 | 4.11  | 0.00 | 0.07 |
| Lachnospiraceae_ND3007_group  | 0.56  | 0.48 | 0.71 | 0.27  | 0.72 | 0.86 | 0.05  | 0.95 | 0.98 | -0.03 | 0.97 | 0.98 | 0.25  | 0.75 | 0.89 |
| Lachnospiraceae_NK4A136_group | 2.40  | 0.02 | 0.10 | 1.29  | 0.20 | 0.53 | 0.37  | 0.74 | 0.93 | 0.33  | 0.76 | 0.95 | 0.63  | 0.57 | 0.79 |
| Lachnospiraceae_UCG.001       | 1.95  | 0.02 | 0.09 | 1.52  | 0.05 | 0.29 | 1.23  | 0.14 | 0.59 | 1.33  | 0.12 | 0.55 | 1.62  | 0.06 | 0.33 |
| Lachnospiraceae_UCG.004       | 1.26  | 0.19 | 0.39 | 0.95  | 0.29 | 0.60 | 0.76  | 0.41 | 0.71 | 0.73  | 0.42 | 0.74 | 0.92  | 0.33 | 0.65 |
| Lachnospiraceae_UCG.010       | -0.58 | 0.65 | 0.82 | -1.23 | 0.31 | 0.60 | -1.78 | 0.15 | 0.59 | -1.71 | 0.16 | 0.61 | -1.58 | 0.20 | 0.64 |
| Lactobacillus                 | -0.40 | 0.66 | 0.82 | 0.24  | 0.78 | 0.89 | 0.00  | 1.00 | 1.00 | -0.13 | 0.89 | 0.97 | 0.04  | 0.96 | 0.97 |
| Lactococcus                   | 2.94  | 0.07 | 0.19 | 1.86  | 0.22 | 0.54 | 2.16  | 0.18 | 0.59 | 2.13  | 0.18 | 0.61 | 2.15  | 0.19 | 0.64 |
| Marvinbryantia                | 1.27  | 0.15 | 0.35 | 0.86  | 0.30 | 0.60 | 0.37  | 0.68 | 0.89 | 0.34  | 0.71 | 0.93 | 0.47  | 0.60 | 0.81 |
| Megasphaera                   | -0.21 | 0.74 | 0.85 | 0.47  | 0.44 | 0.68 | 0.69  | 0.28 | 0.71 | 0.71  | 0.27 | 0.68 | 0.66  | 0.31 | 0.64 |
| Monoglobus                    | 2.85  | 0.01 | 0.05 | 2.19  | 0.02 | 0.16 | 1.28  | 0.21 | 0.65 | 1.31  | 0.20 | 0.63 | 1.56  | 0.14 | 0.58 |
| Moryella                      | 1.43  | 0.37 | 0.60 | 0.56  | 0.71 | 0.86 | -0.44 | 0.78 | 0.94 | -0.45 | 0.78 | 0.95 | -0.33 | 0.84 | 0.93 |
| Negativibacillus              | 1.03  | 0.27 | 0.53 | 1.37  | 0.12 | 0.39 | 1.31  | 0.15 | 0.59 | 1.37  | 0.13 | 0.58 | 1.53  | 0.10 | 0.50 |
| NK4A214_group                 | 0.94  | 0.22 | 0.45 | 0.44  | 0.55 | 0.76 | -0.03 | 0.97 | 0.98 | 0.08  | 0.92 | 0.97 | 0.30  | 0.70 | 0.89 |
| Odoribacter                   | 1.19  | 0.09 | 0.22 | 0.51  | 0.44 | 0.68 | 0.45  | 0.52 | 0.82 | 0.46  | 0.51 | 0.81 | 0.54  | 0.44 | 0.73 |
| Oscillibacter                 | 3.15  | 0.01 | 0.08 | 2.97  | 0.01 | 0.16 | 3.17  | 0.01 | 0.22 | 3.40  | 0.01 | 0.14 | 3.74  | 0.01 | 0.11 |
| Oscillospira                  | 2.24  | 0.17 | 0.36 | 1.96  | 0.20 | 0.52 | 2.11  | 0.17 | 0.59 | 2.12  | 0.17 | 0.61 | 2.59  | 0.11 | 0.50 |
| Oxalobacter                   | 2.37  | 0.06 | 0.18 | 1.26  | 0.30 | 0.60 | 1.17  | 0.36 | 0.71 | 1.23  | 0.34 | 0.68 | 0.87  | 0.51 | 0.75 |
| Paludicola                    | 4.61  | 0.00 | 0.02 | 3.83  | 0.00 | 0.08 | 3.41  | 0.01 | 0.20 | 3.66  | 0.01 | 0.14 | 3.79  | 0.01 | 0.11 |
| Parabacteroides               | 0.09  | 0.92 | 0.96 | 0.06  | 0.94 | 0.97 | 0.17  | 0.85 | 0.96 | 0.10  | 0.91 | 0.97 | 0.16  | 0.86 | 0.93 |
| Paraprevotella                | -0.48 | 0.46 | 0.69 | -0.36 | 0.56 | 0.78 | -0.33 | 0.62 | 0.88 | -0.28 | 0.67 | 0.91 | -0.14 | 0.83 | 0.93 |
| Parasutterella                | 1.24  | 0.07 | 0.20 | 1.02  | 0.11 | 0.39 | 0.93  | 0.18 | 0.59 | 0.90  | 0.19 | 0.61 | 0.85  | 0.22 | 0.64 |
| Phascolarctobacterium         | 1.00  | 0.12 | 0.29 | 0.93  | 0.12 | 0.39 | 0.73  | 0.24 | 0.70 | 0.78  | 0.22 | 0.65 | 0.66  | 0.31 | 0.64 |
| Phocea                        | 0.44  | 0.78 | 0.85 | -0.09 | 0.95 | 0.97 | 0.46  | 0.76 | 0.94 | 0.40  | 0.79 | 0.95 | 0.53  | 0.73 | 0.89 |
| Prevotella                    | -0.31 | 0.58 | 0.79 | -0.16 | 0.76 | 0.88 | -0.16 | 0.78 | 0.94 | -0.13 | 0.81 | 0.95 | -0.14 | 0.81 | 0.93 |
| Romboutsia                    | -0.07 | 0.95 | 0.96 | 0.40  | 0.70 | 0.85 | 0.91  | 0.40 | 0.71 | 0.75  | 0.50 | 0.81 | 1.15  | 0.31 | 0.64 |
| Roseburia                     | 2.39  | 0.03 | 0.12 | 2.10  | 0.05 | 0.27 | 1.04  | 0.36 | 0.71 | 1.00  | 0.38 | 0.68 | 1.18  | 0.31 | 0.64 |
| Rothia                        | -5.02 | 0.02 | 0.08 | -5.04 | 0.01 | 0.13 | -5.83 | 0.00 | 0.16 | -6.05 | 0.00 | 0.12 | -5.82 | 0.01 | 0.11 |
| Ruminococcus                  | 2.29  | 0.00 | 0.03 | 1.66  | 0.02 | 0.16 | 1.22  | 0.11 | 0.58 | 1.27  | 0.09 | 0.51 | 1.50  | 0.05 | 0.31 |
| Sellimonas                    | 0.95  | 0.40 | 0.63 | 0.70  | 0.51 | 0.74 | 0.82  | 0.45 | 0.75 | 0.97  | 0.37 | 0.68 | 1.03  | 0.35 | 0.65 |
| Senegalimassilia              | -0.48 | 0.62 | 0.80 | -0.21 | 0.82 | 0.91 | -0.76 | 0.42 | 0.71 | -0.71 | 0.46 | 0.78 | -0.61 | 0.53 | 0.76 |
| Slackia                       | -0.37 | 0.68 | 0.82 | -0.43 | 0.61 | 0.80 | -0.46 | 0.59 | 0.88 | -0.47 | 0.58 | 0.84 | -0.51 | 0.55 | 0.77 |
| Streptococcus                 | 1.89  | 0.16 | 0.35 | 1.73  | 0.16 | 0.50 | 1.33  | 0.32 | 0.71 | 1.24  | 0.35 | 0.68 | 1.66  | 0.23 | 0.64 |
| Subdoligranulum               | 2.81  | 0.01 | 0.05 | 2.36  | 0.02 | 0.16 | 2.01  | 0.04 | 0.33 | 2.06  | 0.04 | 0.29 | 2.28  | 0.03 | 0.21 |
| Sutterella                    | -1.45 | 0.02 | 0.09 | -1.01 | 0.08 | 0.35 | -1.00 | 0.10 | 0.58 | -1.01 | 0.10 | 0.51 | -0.96 | 0.12 | 0.54 |
| TM7x                          | -0.40 | 0.78 | 0.85 | -0.57 | 0.67 | 0.84 | -0.31 | 0.82 | 0.96 | -0.34 | 0.80 | 0.95 | -0.16 | 0.91 | 0.95 |
| Turicibacter                  | -1.51 | 0.33 | 0.60 | -0.71 | 0.63 | 0.81 | -0.77 | 0.63 | 0.88 | -0.95 | 0.55 | 0.84 | -1.01 | 0.53 | 0.76 |
| Tuzzerella                    | 0.17  | 0.88 | 0.93 | 0.11  | 0.91 | 0.97 | 0.16  | 0.88 | 0.96 | 0.21  | 0.85 | 0.95 | 0.17  | 0.88 | 0.93 |
| UBA1819                       | 1.17  | 0.41 | 0.64 | 0.70  | 0.60 | 0.80 | 1.37  | 0.32 | 0.71 | 1.61  | 0.25 | 0.68 | 1.54  | 0.28 | 0.64 |
| UCG.002                       | 1.87  | 0.01 | 0.05 | 1.24  | 0.07 | 0.30 | 1.18  | 0.10 | 0.58 | 1.26  | 0.08 | 0.48 | 1.42  | 0.05 | 0.31 |
| UCG.003                       | 0.97  | 0.24 | 0.47 | 0.64  | 0.41 | 0.66 | 0.41  | 0.61 | 0.88 | 0.44  | 0.58 | 0.84 | 0.65  | 0.43 | 0.73 |
| UCG.005                       | 2.34  | 0.01 | 0.05 | 1.50  | 0.07 | 0.30 | 0.72  | 0.41 | 0.71 | 0.84  | 0.34 | 0.68 | 1.14  | 0.21 | 0.64 |
| UCG.009                       | 1.99  | 0.17 | 0.36 | 0.89  | 0.51 | 0.74 | -0.11 | 0.94 | 0.98 | -0.17 | 0.91 | 0.97 | 0.11  | 0.94 | 0.97 |
| Veillonella                   | 0.86  | 0.36 | 0.60 | 1.08  | 0.22 | 0.54 | 0.42  | 0.66 | 0.88 | 0.33  | 0.72 | 0.93 | 0.69  | 0.48 | 0.74 |
| Victivallis                   | 2.04  | 0.05 | 0.15 | 1.64  | 0.09 | 0.36 | 1.05  | 0.31 | 0.71 | 1.08  | 0.30 | 0.68 | 0.98  | 0.35 | 0.65 |

Multivariable-adjusted regression models adjusted for:

Model 1: sequencing batch, age, race, gender, study center

Model 2: Model 1, with education

Model 3: Model 2, with physical activity, diet score, medication use, and smoking

Model 4: Model 3 with BMI

Model 5: Model 4 with hypertension and diabetes

eTable 27: Multivariable-adjusted regression coefficients, p-values, and false discovery rate (FDR)-adjusted p-values for genera among Black participants with respect to Stroop.

|                               | Model1 |         |      | Model2 |         |      | Model3 |         |      | Model4 |         |      | Model5 |         |      |
|-------------------------------|--------|---------|------|--------|---------|------|--------|---------|------|--------|---------|------|--------|---------|------|
|                               | beta   | p-value | FDR  | beta   | p-value | FDR  | beta   | p-value | FDR  | beta   | p-value | FDR  | beta   | p-value | FDR  |
| Acetanaerobacterium           | -0.60  | 0.71    | 0.86 | -0.59  | 0.71    | 0.92 | -0.08  | 0.96    | 0.99 | -0.08  | 0.96    | 0.99 | -0.09  | 0.95    | 0.99 |
| Acidaminococcus               | 0.36   | 0.44    | 0.76 | 0.17   | 0.72    | 0.92 | -0.51  | 0.31    | 0.89 | -0.51  | 0.31    | 0.89 | -0.56  | 0.27    | 0.81 |
| Actinomyces                   | 0.20   | 0.88    | 0.97 | -0.19  | 0.88    | 0.96 | -1.24  | 0.35    | 0.89 | -1.24  | 0.35    | 0.89 | -1.56  | 0.25    | 0.81 |
| Adlercreutzia                 | -0.11  | 0.90    | 0.97 | 0.12   | 0.89    | 0.96 | 0.15   | 0.86    | 0.99 | 0.15   | 0.86    | 0.99 | 0.14   | 0.87    | 0.99 |
| Agathobacter                  | -0.77  | 0.48    | 0.76 | -0.63  | 0.55    | 0.88 | 0.16   | 0.88    | 0.99 | 0.16   | 0.88    | 0.99 | -0.07  | 0.95    | 0.99 |
| Akkermansia                   | -1.12  | 0.05    | 0.28 | -0.83  | 0.14    | 0.56 | -0.71  | 0.22    | 0.89 | -0.71  | 0.22    | 0.89 | -0.74  | 0.21    | 0.81 |
| Alistipes                     | -0.36  | 0.71    | 0.86 | -0.05  | 0.96    | 0.98 | 0.27   | 0.78    | 0.99 | 0.26   | 0.78    | 0.99 | 0.23   | 0.81    | 0.99 |
| Allisonella                   | 1.00   | 0.29    | 0.61 | 0.14   | 0.88    | 0.96 | -0.23  | 0.82    | 0.99 | -0.23  | 0.82    | 0.99 | -0.20  | 0.85    | 0.99 |
| Anaerofilum                   | -1.39  | 0.27    | 0.61 | -0.68  | 0.59    | 0.88 | -0.99  | 0.44    | 0.99 | -0.99  | 0.44    | 0.99 | -1.10  | 0.40    | 0.92 |
| Anaerostipes                  | 0.13   | 0.91    | 0.97 | 0.49   | 0.67    | 0.92 | 1.20   | 0.31    | 0.89 | 1.21   | 0.31    | 0.89 | 1.15   | 0.35    | 0.89 |
| Anaerotruncus                 | -1.77  | 0.10    | 0.41 | -1.54  | 0.14    | 0.56 | -1.21  | 0.26    | 0.89 | -1.22  | 0.26    | 0.89 | -1.49  | 0.17    | 0.75 |
| Atopobium                     | 3.30   | 0.08    | 0.36 | 2.88   | 0.11    | 0.56 | 2.48   | 0.19    | 0.89 | 2.50   | 0.19    | 0.89 | 1.98   | 0.31    | 0.83 |
| Bacteroides                   | -2.47  | 0.12    | 0.47 | -2.20  | 0.16    | 0.56 | -2.20  | 0.15    | 0.89 | -2.24  | 0.14    | 0.89 | -2.20  | 0.15    | 0.75 |
| Barnesiella                   | -0.37  | 0.51    | 0.76 | -0.44  | 0.42    | 0.84 | -0.26  | 0.64    | 0.99 | -0.26  | 0.64    | 0.99 | -0.32  | 0.58    | 0.99 |
| Bifidobacterium               | 0.26   | 0.72    | 0.86 | 0.08   | 0.91    | 0.97 | 0.05   | 0.94    | 0.99 | 0.05   | 0.95    | 0.99 | 0.04   | 0.95    | 0.99 |
| Bilophila                     | -0.33  | 0.64    | 0.83 | 0.05   | 0.94    | 0.97 | -0.01  | 0.99    | 0.99 | -0.01  | 0.99    | 0.99 | -0.02  | 0.97    | 0.99 |
| Blautia                       | -4.37  | 0.06    | 0.32 | -4.13  | 0.07    | 0.40 | -4.06  | 0.08    | 0.84 | -4.09  | 0.08    | 0.83 | -5.36  | 0.03    | 0.71 |
| Butyricoccus                  | -3.73  | 0.02    | 0.16 | -2.83  | 0.07    | 0.40 | -1.47  | 0.34    | 0.89 | -1.48  | 0.34    | 0.89 | -1.68  | 0.29    | 0.81 |
| Butyrivimonas                 | -1.42  | 0.02    | 0.19 | -1.26  | 0.04    | 0.40 | -1.17  | 0.06    | 0.84 | -1.17  | 0.06    | 0.83 | -1.17  | 0.06    | 0.74 |
| CAG.56                        | -0.36  | 0.61    | 0.83 | -0.31  | 0.65    | 0.90 | 0.49   | 0.48    | 0.99 | 0.49   | 0.48    | 0.99 | 0.27   | 0.71    | 0.99 |
| Candidatus_Soleaferrea        | -1.48  | 0.30    | 0.62 | -1.27  | 0.36    | 0.83 | -2.09  | 0.13    | 0.89 | -2.09  | 0.13    | 0.89 | -2.16  | 0.13    | 0.74 |
| Caproiciproducens             | -0.95  | 0.45    | 0.76 | -0.76  | 0.53    | 0.88 | -0.25  | 0.84    | 0.99 | -0.24  | 0.85    | 0.99 | -0.51  | 0.69    | 0.99 |
| Catenibacterium               | -0.42  | 0.53    | 0.76 | -0.53  | 0.42    | 0.84 | -0.29  | 0.67    | 0.99 | -0.29  | 0.67    | 0.99 | -0.27  | 0.69    | 0.99 |
| Christensenellaceae_R.7_group | -1.77  | 0.00    | 0.08 | -1.41  | 0.02    | 0.30 | -0.75  | 0.22    | 0.89 | -0.76  | 0.22    | 0.89 | -0.99  | 0.12    | 0.74 |
| Clostridium_sensu_stricto_1   | 0.89   | 0.27    | 0.61 | 0.69   | 0.39    | 0.84 | 1.14   | 0.16    | 0.89 | 1.14   | 0.16    | 0.89 | 1.12   | 0.17    | 0.75 |
| Colidextribacter              | -0.86  | 0.53    | 0.76 | -0.74  | 0.58    | 0.88 | -1.49  | 0.26    | 0.89 | -1.49  | 0.26    | 0.89 | -2.14  | 0.12    | 0.74 |
| Collinsella                   | 0.03   | 0.96    | 0.98 | -0.41  | 0.52    | 0.88 | -0.11  | 0.87    | 0.99 | -0.11  | 0.87    | 0.99 | -0.09  | 0.89    | 0.99 |
| Coprobacter                   | -1.02  | 0.20    | 0.55 | -0.85  | 0.28    | 0.82 | -0.31  | 0.70    | 0.99 | -0.31  | 0.70    | 0.99 | -0.22  | 0.79    | 0.99 |
| Coprococcus                   | -0.10  | 0.90    | 0.97 | -0.26  | 0.74    | 0.92 | -0.10  | 0.90    | 0.99 | -0.10  | 0.90    | 0.99 | -0.23  | 0.78    | 0.99 |
| Deffluviitaleaceae_UCG.011    | -3.59  | 0.00    | 0.08 | -3.34  | 0.00    | 0.14 | -2.52  | 0.03    | 0.84 | -2.54  | 0.03    | 0.83 | -2.68  | 0.03    | 0.71 |
| Desulfovibrio                 | -0.31  | 0.62    | 0.83 | -0.34  | 0.58    | 0.88 | -0.23  | 0.71    | 0.99 | -0.23  | 0.72    | 0.99 | -0.26  | 0.69    | 0.99 |
| Dialister                     | 0.38   | 0.45    | 0.76 | 0.27   | 0.59    | 0.88 | 0.33   | 0.53    | 0.99 | 0.33   | 0.53    | 0.99 | 0.25   | 0.64    | 0.99 |
| DNF00809                      | -1.94  | 0.15    | 0.47 | -1.89  | 0.15    | 0.56 | -2.22  | 0.09    | 0.88 | -2.22  | 0.09    | 0.89 | -2.24  | 0.09    | 0.74 |
| Dorea                         | -1.57  | 0.07    | 0.36 | -1.58  | 0.07    | 0.40 | -1.69  | 0.05    | 0.84 | -1.69  | 0.05    | 0.83 | -1.67  | 0.05    | 0.74 |
| DTU089                        | -1.33  | 0.21    | 0.55 | -1.01  | 0.33    | 0.83 | -0.93  | 0.37    | 0.90 | -0.93  | 0.37    | 0.90 | -1.16  | 0.27    | 0.81 |
| Eggerthella                   | 0.48   | 0.63    | 0.83 | 0.78   | 0.42    | 0.84 | -0.17  | 0.87    | 0.99 | -0.17  | 0.87    | 0.99 | -0.28  | 0.78    | 0.99 |
| Eisenbergiella                | 0.22   | 0.83    | 0.93 | 0.30   | 0.76    | 0.92 | -0.34  | 0.73    | 0.99 | -0.33  | 0.74    | 0.99 | -0.34  | 0.73    | 0.99 |
| Enterorhabdus                 | -1.79  | 0.09    | 0.41 | -1.62  | 0.12    | 0.56 | -0.62  | 0.57    | 0.99 | -0.62  | 0.58    | 0.99 | -0.87  | 0.44    | 0.96 |
| Erysipelatoclostridium        | -0.14  | 0.90    | 0.97 | -0.03  | 0.98    | 0.98 | -0.34  | 0.75    | 0.99 | -0.34  | 0.75    | 0.99 | -0.26  | 0.81    | 0.99 |
| Erysipelotrichaceae_UCG.003   | -0.51  | 0.50    | 0.76 | -0.51  | 0.49    | 0.88 | 0.04   | 0.96    | 0.99 | 0.04   | 0.95    | 0.99 | -0.10  | 0.90    | 0.99 |
| Escherichia_Shigella          | 0.00   | 1.00    | 1.00 | -0.42  | 0.55    | 0.88 | -0.44  | 0.54    | 0.99 | -0.45  | 0.54    | 0.99 | -0.36  | 0.63    | 0.99 |
| Faecalibacterium              | -1.39  | 0.26    | 0.61 | -0.79  | 0.52    | 0.88 | -0.12  | 0.92    | 0.99 | -0.12  | 0.92    | 0.99 | -0.37  | 0.77    | 0.99 |
| Family_XIII_AD3011_group      | -2.35  | 0.01    | 0.14 | -1.83  | 0.06    | 0.40 | -1.02  | 0.31    | 0.89 | -1.02  | 0.31    | 0.89 | -1.16  | 0.25    | 0.81 |
| Family_XIII_UCG.001           | -2.45  | 0.04    | 0.28 | -2.27  | 0.05    | 0.40 | -1.28  | 0.29    | 0.89 | -1.28  | 0.29    | 0.89 | -1.34  | 0.27    | 0.81 |
| FD2005                        | -0.37  | 0.73    | 0.86 | -0.97  | 0.36    | 0.83 | 0.11   | 0.92    | 0.99 | 0.11   | 0.92    | 0.99 | -0.09  | 0.93    | 0.99 |
| Flavonifractor                | 0.68   | 0.49    | 0.76 | 0.76   | 0.43    | 0.84 | -0.52  | 0.60    | 0.99 | -0.53  | 0.60    | 0.99 | -0.73  | 0.48    | 0.98 |
| Frisingicoccus                | -0.45  | 0.60    | 0.83 | -0.25  | 0.76    | 0.92 | -0.37  | 0.67    | 0.99 | -0.36  | 0.67    | 0.99 | -0.45  | 0.60    | 0.99 |
| Fusicatenibacter              | -0.83  | 0.28    | 0.61 | -0.67  | 0.37    | 0.83 | -0.73  | 0.35    | 0.89 | -0.74  | 0.34    | 0.89 | -0.87  | 0.28    | 0.81 |
| Fusobacterium                 | 0.83   | 0.43    | 0.76 | 0.36   | 0.73    | 0.92 | 0.09   | 0.93    | 0.99 | 0.10   | 0.93    | 0.99 | 0.21   | 0.85    | 0.99 |
| GCA.900066575                 | -2.73  | 0.01    | 0.14 | -2.27  | 0.04    | 0.40 | -1.20  | 0.28    | 0.89 | -1.21  | 0.28    | 0.89 | -1.50  | 0.18    | 0.77 |
| Gordonibacter                 | -0.49  | 0.67    | 0.85 | 0.09   | 0.93    | 0.97 | 0.02   | 0.99    | 0.99 | 0.03   | 0.98    | 0.99 | 0.07   | 0.95    | 0.99 |
| Granulicatella                | 0.64   | 0.61    | 0.83 | 0.25   | 0.84    | 0.96 | -0.42  | 0.74    | 0.99 | -0.43  | 0.74    | 0.99 | -0.73  | 0.57    | 0.99 |
| Haemophilus                   | -0.24  | 0.75    | 0.86 | -0.11  | 0.88    | 0.96 | 0.08   | 0.92    | 0.99 | 0.08   | 0.92    | 0.99 | -0.14  | 0.86    | 0.99 |
| Harryflintia                  | -2.33  | 0.05    | 0.28 | -2.28  | 0.05    | 0.40 | -1.63  | 0.17    | 0.89 | -1.64  | 0.17    | 0.89 | -1.90  | 0.11    | 0.74 |

|                               |       |      |      |       |      |      |       |      |      |       |      |      |       |      |      |
|-------------------------------|-------|------|------|-------|------|------|-------|------|------|-------|------|------|-------|------|------|
| Holdemabella                  | -0.02 | 0.97 | 0.98 | -0.21 | 0.77 | 0.92 | 0.07  | 0.93 | 0.99 | 0.07  | 0.93 | 0.99 | 0.20  | 0.79 | 0.99 |
| Holdemania                    | -1.94 | 0.35 | 0.68 | -1.93 | 0.34 | 0.83 | -2.56 | 0.21 | 0.89 | -2.56 | 0.21 | 0.89 | -2.43 | 0.24 | 0.81 |
| Howardella                    | -0.40 | 0.69 | 0.86 | -0.30 | 0.76 | 0.92 | 0.56  | 0.58 | 0.99 | 0.58  | 0.57 | 0.99 | 0.46  | 0.66 | 0.99 |
| Hungatella                    | 1.46  | 0.14 | 0.47 | 1.44  | 0.13 | 0.56 | 0.58  | 0.56 | 0.99 | 0.58  | 0.56 | 0.99 | 0.51  | 0.61 | 0.99 |
| Hydrogenoanaerobacterium      | -0.98 | 0.38 | 0.72 | -0.22 | 0.84 | 0.96 | 0.33  | 0.77 | 0.99 | 0.35  | 0.77 | 0.99 | 0.27  | 0.82 | 0.99 |
| Incertae_Sedis                | -1.50 | 0.32 | 0.65 | -1.34 | 0.36 | 0.83 | -1.41 | 0.35 | 0.89 | -1.41 | 0.35 | 0.89 | -1.49 | 0.33 | 0.88 |
| Intestinibacter               | -0.07 | 0.95 | 0.98 | -0.08 | 0.94 | 0.97 | -0.03 | 0.98 | 0.99 | -0.04 | 0.97 | 0.99 | -0.03 | 0.98 | 0.99 |
| Intestinimonas                | -1.92 | 0.03 | 0.23 | -1.43 | 0.11 | 0.56 | -1.20 | 0.19 | 0.89 | -1.21 | 0.19 | 0.89 | -1.29 | 0.17 | 0.75 |
| Lachnoclostridium             | 4.23  | 0.02 | 0.19 | 3.36  | 0.07 | 0.40 | 2.67  | 0.15 | 0.89 | 2.67  | 0.15 | 0.89 | 2.97  | 0.11 | 0.74 |
| Lachnospira                   | -1.25 | 0.13 | 0.47 | -0.79 | 0.34 | 0.83 | 0.03  | 0.97 | 0.99 | 0.02  | 0.98 | 0.99 | -0.23 | 0.79 | 0.99 |
| Lachnospiraceae_FCS020_group  | -2.84 | 0.00 | 0.10 | -2.33 | 0.02 | 0.30 | -1.19 | 0.24 | 0.89 | -1.19 | 0.24 | 0.89 | -1.29 | 0.21 | 0.81 |
| Lachnospiraceae_ND3007_group  | -0.80 | 0.23 | 0.56 | -0.66 | 0.31 | 0.83 | -0.25 | 0.70 | 0.99 | -0.26 | 0.69 | 0.99 | -0.51 | 0.46 | 0.96 |
| Lachnospiraceae_NK4A136_group | -0.04 | 0.96 | 0.98 | 0.57  | 0.51 | 0.88 | 1.76  | 0.05 | 0.84 | 1.76  | 0.05 | 0.83 | 1.51  | 0.11 | 0.74 |
| Lachnospiraceae_UCG.001       | -0.93 | 0.18 | 0.51 | -0.73 | 0.28 | 0.82 | 0.23  | 0.74 | 0.99 | 0.24  | 0.74 | 0.99 | 0.02  | 0.98 | 0.99 |
| Lachnospiraceae_UCG.004       | -0.49 | 0.53 | 0.76 | -0.31 | 0.69 | 0.92 | -0.12 | 0.87 | 0.99 | -0.13 | 0.87 | 0.99 | -0.18 | 0.82 | 0.99 |
| Lachnospiraceae_UCG.010       | -0.83 | 0.43 | 0.76 | -0.49 | 0.64 | 0.90 | 0.40  | 0.70 | 0.99 | 0.41  | 0.69 | 0.99 | 0.34  | 0.75 | 0.99 |
| Lactobacillus                 | 0.21  | 0.79 | 0.89 | -0.15 | 0.84 | 0.96 | -0.19 | 0.81 | 0.99 | -0.21 | 0.80 | 0.99 | -0.23 | 0.78 | 0.99 |
| Lactococcus                   | -1.64 | 0.22 | 0.56 | -1.05 | 0.42 | 0.84 | -0.18 | 0.89 | 0.99 | -0.19 | 0.89 | 0.99 | 0.12  | 0.93 | 0.99 |
| Marvinbryantia                | -0.67 | 0.36 | 0.69 | -0.43 | 0.55 | 0.88 | 0.13  | 0.86 | 0.99 | 0.13  | 0.86 | 0.99 | -0.09 | 0.91 | 0.99 |
| Megasphaera                   | 0.22  | 0.67 | 0.85 | -0.14 | 0.79 | 0.94 | -0.61 | 0.26 | 0.89 | -0.61 | 0.26 | 0.89 | -0.49 | 0.38 | 0.92 |
| Monoglobus                    | -2.09 | 0.01 | 0.14 | -1.78 | 0.03 | 0.38 | -0.09 | 0.92 | 0.99 | -0.08 | 0.92 | 0.99 | -0.26 | 0.77 | 0.99 |
| Moryella                      | -2.23 | 0.09 | 0.41 | -1.72 | 0.18 | 0.57 | -0.10 | 0.94 | 0.99 | -0.09 | 0.95 | 0.99 | -0.28 | 0.84 | 0.99 |
| Negativibacillus              | -0.95 | 0.22 | 0.56 | -1.12 | 0.14 | 0.56 | -1.37 | 0.07 | 0.84 | -1.37 | 0.07 | 0.83 | -1.52 | 0.05 | 0.74 |
| NK4A214_group                 | -1.66 | 0.01 | 0.13 | -1.42 | 0.02 | 0.30 | -0.80 | 0.20 | 0.89 | -0.81 | 0.20 | 0.89 | -1.06 | 0.10 | 0.74 |
| Odoribacter                   | -0.62 | 0.28 | 0.61 | -0.25 | 0.66 | 0.91 | -0.35 | 0.55 | 0.99 | -0.35 | 0.55 | 0.99 | -0.48 | 0.42 | 0.93 |
| Oscillibacter                 | -1.49 | 0.16 | 0.47 | -1.45 | 0.17 | 0.56 | -1.40 | 0.20 | 0.89 | -1.42 | 0.20 | 0.89 | -1.60 | 0.16 | 0.75 |
| Oscillospira                  | -1.27 | 0.34 | 0.68 | -1.19 | 0.36 | 0.83 | -1.46 | 0.26 | 0.89 | -1.46 | 0.26 | 0.89 | -2.05 | 0.13 | 0.74 |
| Oxalobacter                   | -1.13 | 0.28 | 0.61 | -0.56 | 0.60 | 0.88 | 0.85  | 0.43 | 0.99 | 0.86  | 0.43 | 0.99 | 1.18  | 0.29 | 0.81 |
| Paludicola                    | -3.06 | 0.01 | 0.12 | -2.69 | 0.01 | 0.30 | -1.86 | 0.10 | 0.89 | -1.89 | 0.10 | 0.89 | -2.01 | 0.08 | 0.74 |
| Parabacteroides               | -0.25 | 0.74 | 0.86 | -0.23 | 0.76 | 0.92 | -0.28 | 0.71 | 0.99 | -0.28 | 0.70 | 0.99 | -0.38 | 0.61 | 0.99 |
| Paraprevotella                | 0.78  | 0.15 | 0.47 | 0.73  | 0.17 | 0.56 | 0.70  | 0.21 | 0.89 | 0.70  | 0.21 | 0.89 | 0.61  | 0.29 | 0.81 |
| Parasutterella                | -1.42 | 0.01 | 0.14 | -1.31 | 0.02 | 0.30 | -1.05 | 0.07 | 0.84 | -1.05 | 0.07 | 0.83 | -1.01 | 0.09 | 0.74 |
| Phascolarctobacterium         | -0.77 | 0.15 | 0.47 | -0.72 | 0.17 | 0.56 | -0.52 | 0.33 | 0.89 | -0.52 | 0.33 | 0.89 | -0.40 | 0.46 | 0.96 |
| Phocaea                       | 0.52  | 0.70 | 0.86 | 0.77  | 0.55 | 0.88 | 0.81  | 0.53 | 0.99 | 0.81  | 0.53 | 0.99 | 0.58  | 0.65 | 0.99 |
| Prevotella                    | 0.66  | 0.16 | 0.47 | 0.57  | 0.22 | 0.66 | 0.50  | 0.29 | 0.89 | 0.50  | 0.29 | 0.89 | 0.45  | 0.34 | 0.89 |
| Romboutsia                    | 0.60  | 0.51 | 0.76 | 0.33  | 0.72 | 0.92 | 0.07  | 0.94 | 0.99 | 0.06  | 0.95 | 0.99 | -0.14 | 0.89 | 0.99 |
| Roseburia                     | -0.67 | 0.47 | 0.76 | -0.53 | 0.55 | 0.88 | 0.01  | 0.99 | 0.99 | 0.01  | 0.99 | 0.99 | -0.30 | 0.76 | 0.99 |
| Rothia                        | 2.51  | 0.15 | 0.47 | 2.51  | 0.14 | 0.56 | 0.79  | 0.65 | 0.99 | 0.79  | 0.65 | 0.99 | 0.19  | 0.91 | 0.99 |
| Ruminococcus                  | -1.12 | 0.07 | 0.36 | -0.82 | 0.18 | 0.57 | -0.42 | 0.51 | 0.99 | -0.42 | 0.51 | 0.99 | -0.58 | 0.38 | 0.92 |
| Sellimonas                    | -0.17 | 0.85 | 0.95 | -0.06 | 0.95 | 0.97 | -0.53 | 0.56 | 0.99 | -0.53 | 0.56 | 0.99 | -0.60 | 0.51 | 0.99 |
| Senegalimassilia              | 0.03  | 0.97 | 0.98 | -0.11 | 0.89 | 0.96 | 0.54  | 0.50 | 0.99 | 0.55  | 0.50 | 0.99 | 0.45  | 0.58 | 0.99 |
| Slackia                       | -1.37 | 0.06 | 0.32 | -1.35 | 0.06 | 0.40 | -1.02 | 0.15 | 0.89 | -1.02 | 0.15 | 0.89 | -1.00 | 0.17 | 0.75 |
| Streptococcus                 | -0.71 | 0.52 | 0.76 | -0.66 | 0.54 | 0.88 | -0.74 | 0.51 | 0.99 | -0.75 | 0.51 | 0.99 | -0.79 | 0.50 | 0.98 |
| Subdoligranulum               | -2.91 | 0.00 | 0.03 | -2.69 | 0.00 | 0.12 | -2.91 | 0.00 | 0.05 | -2.91 | 0.00 | 0.05 | -3.29 | 0.00 | 0.01 |
| Sutterella                    | 0.75  | 0.14 | 0.47 | 0.53  | 0.30 | 0.83 | 0.24  | 0.64 | 0.99 | 0.24  | 0.64 | 0.99 | 0.23  | 0.66 | 0.99 |
| TM7x                          | -0.83 | 0.48 | 0.76 | -0.76 | 0.51 | 0.88 | -0.85 | 0.46 | 0.99 | -0.86 | 0.46 | 0.99 | -1.01 | 0.39 | 0.92 |
| Turicibacter                  | 0.41  | 0.75 | 0.86 | -0.03 | 0.98 | 0.98 | -0.59 | 0.66 | 0.99 | -0.61 | 0.65 | 0.99 | -0.54 | 0.69 | 0.99 |
| Tuzzerella                    | 0.42  | 0.64 | 0.83 | 0.43  | 0.63 | 0.90 | -0.05 | 0.95 | 0.99 | -0.05 | 0.96 | 0.99 | 0.00  | 1.00 | 1.00 |
| UBA1819                       | -1.40 | 0.23 | 0.56 | -1.17 | 0.30 | 0.83 | -2.31 | 0.04 | 0.84 | -2.36 | 0.04 | 0.83 | -2.56 | 0.03 | 0.71 |
| UCG.002                       | -0.83 | 0.16 | 0.47 | -0.49 | 0.40 | 0.84 | -0.02 | 0.97 | 0.99 | -0.02 | 0.97 | 0.99 | -0.22 | 0.71 | 0.99 |
| UCG.003                       | -1.10 | 0.10 | 0.41 | -0.93 | 0.16 | 0.56 | -0.69 | 0.30 | 0.89 | -0.69 | 0.30 | 0.89 | -0.78 | 0.26 | 0.81 |
| UCG.005                       | -2.42 | 0.00 | 0.03 | -2.03 | 0.00 | 0.14 | -1.37 | 0.06 | 0.84 | -1.39 | 0.06 | 0.83 | -1.70 | 0.02 | 0.71 |
| UCG.009                       | -0.82 | 0.50 | 0.76 | -0.25 | 0.83 | 0.96 | 0.67  | 0.58 | 0.99 | 0.67  | 0.58 | 0.99 | 0.42  | 0.73 | 0.99 |
| Veillonella                   | 0.56  | 0.47 | 0.76 | 0.41  | 0.59 | 0.88 | 0.71  | 0.37 | 0.90 | 0.71  | 0.37 | 0.90 | 0.60  | 0.47 | 0.96 |
| Victivallis                   | -0.62 | 0.47 | 0.76 | -0.41 | 0.62 | 0.90 | 0.63  | 0.47 | 0.99 | 0.63  | 0.47 | 0.99 | 0.71  | 0.42 | 0.93 |

Multivariable-adjusted regression models adjusted for:

Model 1: sequencing batch, age, race, gender, study center

Model 2: Model 1, with education

Model 3: Model 2, with physical activity, diet score, medication use, and smoking

Model 4: Model 3 with BMI

Model 5: Model 4 with hypertension and diabetes

eTable 28: Multivariable-adjusted regression coefficients, p-values, and false discovery rate (FDR)-adjusted p-values for genera among Black participants with respect to RAVLT.

|                               | Model1 |         |      | Model2 |         |      | Model3 |         |      | Model4 |         |      | Model5 |         |      |
|-------------------------------|--------|---------|------|--------|---------|------|--------|---------|------|--------|---------|------|--------|---------|------|
|                               | beta   | p-value | FDR  | beta   | p-value | FDR  | beta   | p-value | FDR  | beta   | p-value | FDR  | beta   | p-value | FDR  |
| Acetanaerobacterium           | 0.00   | 0.99    | 0.99 | 0.01   | 0.97    | 1.00 | -0.08  | 0.73    | 0.89 | -0.07  | 0.75    | 0.92 | -0.09  | 0.70    | 0.91 |
| Acidaminococcus               | -0.13  | 0.05    | 0.49 | -0.09  | 0.15    | 0.68 | -0.06  | 0.40    | 0.86 | -0.06  | 0.37    | 0.85 | -0.07  | 0.35    | 0.86 |
| Actinomyces                   | -0.23  | 0.19    | 0.63 | -0.16  | 0.34    | 0.77 | -0.18  | 0.35    | 0.85 | -0.17  | 0.36    | 0.85 | -0.13  | 0.49    | 0.86 |
| Adlercreutzia                 | 0.23   | 0.05    | 0.49 | 0.18   | 0.11    | 0.68 | 0.15   | 0.23    | 0.76 | 0.15   | 0.22    | 0.76 | 0.15   | 0.22    | 0.81 |
| Agathobacter                  | -0.28  | 0.06    | 0.50 | -0.31  | 0.03    | 0.45 | -0.35  | 0.02    | 0.54 | -0.36  | 0.02    | 0.47 | -0.33  | 0.03    | 0.59 |
| Akkermansia                   | 0.13   | 0.09    | 0.51 | 0.07   | 0.37    | 0.77 | 0.05   | 0.54    | 0.87 | 0.05   | 0.54    | 0.88 | 0.06   | 0.51    | 0.86 |
| Alistipes                     | 0.17   | 0.21    | 0.63 | 0.10   | 0.42    | 0.77 | 0.07   | 0.62    | 0.87 | 0.06   | 0.63    | 0.88 | 0.07   | 0.63    | 0.91 |
| Allisonella                   | -0.31  | 0.02    | 0.33 | -0.12  | 0.33    | 0.77 | -0.08  | 0.58    | 0.87 | -0.08  | 0.57    | 0.88 | -0.10  | 0.49    | 0.86 |
| Anaerofilum                   | 0.26   | 0.14    | 0.63 | 0.10   | 0.55    | 0.88 | 0.07   | 0.69    | 0.88 | 0.08   | 0.66    | 0.88 | 0.11   | 0.56    | 0.89 |
| Anaerostipes                  | 0.06   | 0.72    | 0.87 | -0.01  | 0.93    | 1.00 | 0.05   | 0.77    | 0.91 | 0.04   | 0.82    | 0.95 | 0.08   | 0.63    | 0.91 |
| Anaerotruncus                 | 0.11   | 0.48    | 0.79 | 0.05   | 0.73    | 0.91 | 0.01   | 0.95    | 0.96 | 0.02   | 0.89    | 0.97 | 0.04   | 0.78    | 0.93 |
| Atopobium                     | 0.00   | 0.99    | 0.99 | 0.09   | 0.72    | 0.91 | 0.06   | 0.83    | 0.95 | 0.04   | 0.88    | 0.97 | 0.12   | 0.67    | 0.91 |
| Bacteroides                   | 0.16   | 0.47    | 0.79 | 0.10   | 0.62    | 0.91 | 0.10   | 0.65    | 0.87 | 0.09   | 0.69    | 0.88 | 0.06   | 0.80    | 0.93 |
| Barnesiella                   | 0.02   | 0.78    | 0.87 | 0.03   | 0.65    | 0.91 | 0.05   | 0.50    | 0.87 | 0.05   | 0.49    | 0.88 | 0.06   | 0.43    | 0.86 |
| Bifidobacterium               | 0.09   | 0.36    | 0.69 | 0.14   | 0.15    | 0.68 | 0.14   | 0.18    | 0.76 | 0.13   | 0.20    | 0.75 | 0.15   | 0.16    | 0.80 |
| Bilophila                     | 0.16   | 0.10    | 0.51 | 0.08   | 0.37    | 0.77 | 0.10   | 0.32    | 0.85 | 0.10   | 0.34    | 0.85 | 0.11   | 0.30    | 0.86 |
| Blautia                       | 0.17   | 0.59    | 0.84 | 0.11   | 0.72    | 0.91 | 0.14   | 0.66    | 0.87 | 0.13   | 0.69    | 0.88 | 0.25   | 0.49    | 0.86 |
| Butyricoccus                  | 0.04   | 0.86    | 0.90 | -0.20  | 0.35    | 0.77 | -0.21  | 0.34    | 0.85 | -0.22  | 0.32    | 0.85 | -0.17  | 0.46    | 0.86 |
| Butyrivimonas                 | 0.07   | 0.42    | 0.74 | 0.03   | 0.70    | 0.91 | 0.07   | 0.45    | 0.87 | 0.07   | 0.44    | 0.88 | 0.07   | 0.42    | 0.86 |
| CAG.56                        | -0.04  | 0.70    | 0.87 | -0.05  | 0.61    | 0.91 | -0.06  | 0.53    | 0.87 | -0.07  | 0.50    | 0.88 | -0.05  | 0.64    | 0.91 |
| Candidatus_Soleaferrea        | 0.21   | 0.29    | 0.69 | 0.16   | 0.38    | 0.77 | 0.14   | 0.49    | 0.87 | 0.14   | 0.49    | 0.88 | 0.16   | 0.43    | 0.86 |
| Caproiciproducens             | 0.05   | 0.77    | 0.87 | 0.00   | 0.98    | 1.00 | -0.09  | 0.60    | 0.87 | -0.09  | 0.62    | 0.88 | -0.06  | 0.76    | 0.93 |
| Catenibacterium               | -0.16  | 0.07    | 0.50 | -0.14  | 0.11    | 0.68 | -0.07  | 0.49    | 0.87 | -0.07  | 0.47    | 0.88 | -0.07  | 0.48    | 0.86 |
| Christensenellaceae_R.7_group | 0.04   | 0.65    | 0.85 | -0.05  | 0.52    | 0.85 | -0.10  | 0.25    | 0.79 | -0.10  | 0.28    | 0.85 | -0.07  | 0.41    | 0.86 |
| Clostridium_sensu_stricto_1   | 0.00   | 0.99    | 0.99 | 0.04   | 0.73    | 0.91 | 0.03   | 0.83    | 0.95 | 0.02   | 0.86    | 0.97 | 0.03   | 0.78    | 0.93 |
| Colidextribacter              | -0.18  | 0.34    | 0.69 | -0.21  | 0.23    | 0.68 | -0.17  | 0.37    | 0.85 | -0.17  | 0.37    | 0.85 | -0.10  | 0.60    | 0.91 |
| Collinsella                   | -0.30  | 0.00    | 0.07 | -0.21  | 0.01    | 0.45 | -0.23  | 0.01    | 0.54 | -0.23  | 0.01    | 0.47 | -0.24  | 0.01    | 0.59 |
| Coprobacter                   | -0.04  | 0.70    | 0.87 | -0.08  | 0.42    | 0.77 | -0.07  | 0.53    | 0.87 | -0.07  | 0.57    | 0.88 | -0.07  | 0.56    | 0.89 |
| Coprococcus                   | -0.12  | 0.28    | 0.69 | -0.09  | 0.40    | 0.77 | -0.10  | 0.37    | 0.85 | -0.10  | 0.36    | 0.85 | -0.09  | 0.42    | 0.86 |
| Defluviitaleaceae_UCG.011     | 0.18   | 0.27    | 0.69 | 0.11   | 0.46    | 0.77 | 0.06   | 0.72    | 0.89 | 0.07   | 0.67    | 0.88 | 0.09   | 0.60    | 0.91 |
| Desulfovibrio                 | -0.11  | 0.21    | 0.63 | -0.10  | 0.20    | 0.68 | -0.11  | 0.24    | 0.76 | -0.10  | 0.27    | 0.85 | -0.10  | 0.26    | 0.83 |
| Dialister                     | -0.05  | 0.49    | 0.80 | -0.03  | 0.67    | 0.91 | -0.06  | 0.45    | 0.87 | -0.06  | 0.44    | 0.88 | -0.05  | 0.51    | 0.86 |
| DNF00809                      | -0.20  | 0.27    | 0.69 | -0.22  | 0.21    | 0.68 | -0.27  | 0.16    | 0.76 | -0.26  | 0.16    | 0.75 | -0.25  | 0.19    | 0.80 |
| Dorea                         | -0.17  | 0.17    | 0.63 | -0.17  | 0.15    | 0.68 | -0.16  | 0.20    | 0.76 | -0.16  | 0.19    | 0.75 | -0.17  | 0.18    | 0.80 |
| DTU089                        | -0.05  | 0.75    | 0.87 | -0.13  | 0.35    | 0.77 | -0.20  | 0.18    | 0.76 | -0.20  | 0.18    | 0.75 | -0.19  | 0.21    | 0.80 |
| Eggerthella                   | 0.23   | 0.09    | 0.51 | 0.17   | 0.18    | 0.68 | 0.19   | 0.17    | 0.76 | 0.19   | 0.17    | 0.75 | 0.21   | 0.15    | 0.80 |
| Eisenbergiella                | 0.04   | 0.76    | 0.87 | 0.02   | 0.87    | 0.99 | 0.03   | 0.85    | 0.95 | 0.03   | 0.81    | 0.95 | 0.04   | 0.79    | 0.93 |
| Enterorhabdus                 | -0.14  | 0.33    | 0.69 | -0.18  | 0.19    | 0.68 | -0.24  | 0.13    | 0.75 | -0.24  | 0.13    | 0.75 | -0.20  | 0.21    | 0.80 |
| Erysipelatoclostridium        | 0.33   | 0.03    | 0.37 | 0.30   | 0.04    | 0.45 | 0.33   | 0.03    | 0.54 | 0.33   | 0.03    | 0.47 | 0.33   | 0.03    | 0.59 |
| Erysipelotrichaceae_UCG.003   | -0.04  | 0.71    | 0.87 | -0.04  | 0.71    | 0.91 | -0.10  | 0.33    | 0.85 | -0.10  | 0.34    | 0.85 | -0.08  | 0.48    | 0.86 |
| Escherichia_Shigella          | -0.02  | 0.84    | 0.90 | 0.07   | 0.46    | 0.77 | 0.06   | 0.60    | 0.87 | 0.05   | 0.63    | 0.88 | 0.02   | 0.86    | 0.94 |
| Faecalibacterium              | 0.18   | 0.30    | 0.69 | 0.04   | 0.79    | 0.95 | 0.02   | 0.92    | 0.96 | 0.01   | 0.96    | 0.98 | 0.07   | 0.68    | 0.91 |
| Family_XIII_AD3011_group      | 0.04   | 0.74    | 0.87 | -0.08  | 0.53    | 0.86 | -0.15  | 0.28    | 0.85 | -0.15  | 0.31    | 0.85 | -0.12  | 0.41    | 0.86 |
| Family_XIII_UCG.001           | -0.09  | 0.59    | 0.84 | -0.13  | 0.42    | 0.77 | -0.11  | 0.54    | 0.87 | -0.10  | 0.58    | 0.88 | -0.09  | 0.62    | 0.91 |
| FD2005                        | -0.23  | 0.11    | 0.55 | -0.11  | 0.44    | 0.77 | -0.20  | 0.20    | 0.76 | -0.20  | 0.21    | 0.75 | -0.20  | 0.20    | 0.80 |
| Flavonifractor                | 0.13   | 0.36    | 0.69 | 0.10   | 0.43    | 0.77 | 0.08   | 0.60    | 0.87 | 0.08   | 0.60    | 0.88 | 0.11   | 0.46    | 0.86 |
| Frisingicoccus                | 0.20   | 0.08    | 0.51 | 0.15   | 0.16    | 0.68 | 0.10   | 0.43    | 0.87 | 0.11   | 0.39    | 0.86 | 0.12   | 0.35    | 0.86 |
| Fusicatenibacter              | -0.17  | 0.10    | 0.51 | -0.21  | 0.04    | 0.45 | -0.24  | 0.03    | 0.54 | -0.25  | 0.03    | 0.47 | -0.24  | 0.04    | 0.59 |
| Fusobacterium                 | -0.15  | 0.31    | 0.69 | -0.05  | 0.71    | 0.91 | -0.05  | 0.72    | 0.89 | -0.05  | 0.76    | 0.92 | -0.07  | 0.64    | 0.91 |
| GCA.900066575                 | 0.05   | 0.76    | 0.87 | -0.06  | 0.67    | 0.91 | -0.07  | 0.65    | 0.87 | -0.06  | 0.69    | 0.88 | -0.02  | 0.90    | 0.96 |
| Gordonibacter                 | 0.41   | 0.01    | 0.25 | 0.28   | 0.06    | 0.63 | 0.26   | 0.12    | 0.71 | 0.28   | 0.10    | 0.72 | 0.29   | 0.09    | 0.80 |
| Granulicatella                | 0.07   | 0.71    | 0.87 | 0.14   | 0.38    | 0.77 | 0.15   | 0.42    | 0.87 | 0.14   | 0.45    | 0.88 | 0.18   | 0.35    | 0.86 |
| Haemophilus                   | 0.12   | 0.26    | 0.69 | 0.09   | 0.38    | 0.77 | 0.10   | 0.37    | 0.85 | 0.10   | 0.38    | 0.85 | 0.14   | 0.23    | 0.81 |
| Harryflintia                  | 0.03   | 0.85    | 0.90 | 0.01   | 0.96    | 1.00 | -0.02  | 0.91    | 0.96 | -0.01  | 0.95    | 0.98 | 0.01   | 0.95    | 0.98 |

|                               |       |      |      |       |      |      |       |      |      |       |      |      |       |      |      |
|-------------------------------|-------|------|------|-------|------|------|-------|------|------|-------|------|------|-------|------|------|
| Holdemanella                  | -0.13 | 0.21 | 0.63 | -0.09 | 0.36 | 0.77 | -0.07 | 0.52 | 0.87 | -0.07 | 0.52 | 0.88 | -0.10 | 0.39 | 0.86 |
| Holdemania                    | 0.34  | 0.23 | 0.66 | 0.33  | 0.21 | 0.68 | 0.19  | 0.52 | 0.87 | 0.20  | 0.50 | 0.88 | 0.23  | 0.45 | 0.86 |
| Howardella                    | -0.25 | 0.07 | 0.50 | -0.28 | 0.04 | 0.45 | -0.25 | 0.09 | 0.71 | -0.24 | 0.10 | 0.72 | -0.24 | 0.10 | 0.80 |
| Hungatella                    | 0.03  | 0.82 | 0.90 | 0.03  | 0.80 | 0.95 | 0.01  | 0.94 | 0.96 | 0.01  | 0.95 | 0.98 | 0.00  | 0.98 | 0.98 |
| Hydrogenoanaerobacterium      | 0.16  | 0.30 | 0.69 | -0.01 | 0.95 | 1.00 | -0.01 | 0.93 | 0.96 | 0.00  | 1.00 | 1.00 | 0.03  | 0.87 | 0.94 |
| Incertae_Sedis                | 0.10  | 0.62 | 0.84 | 0.06  | 0.77 | 0.94 | -0.10 | 0.66 | 0.87 | -0.10 | 0.65 | 0.88 | -0.08 | 0.70 | 0.91 |
| Intestinibacter               | 0.09  | 0.51 | 0.81 | 0.10  | 0.45 | 0.77 | 0.06  | 0.68 | 0.87 | 0.05  | 0.76 | 0.92 | 0.07  | 0.66 | 0.91 |
| Intestinimonas                | 0.18  | 0.15 | 0.63 | 0.06  | 0.59 | 0.91 | 0.05  | 0.70 | 0.88 | 0.06  | 0.66 | 0.88 | 0.07  | 0.62 | 0.91 |
| Lachnoclostridium             | -0.20 | 0.43 | 0.74 | 0.00  | 1.00 | 1.00 | 0.15  | 0.58 | 0.87 | 0.14  | 0.61 | 0.88 | 0.11  | 0.69 | 0.91 |
| Lachnospira                   | 0.06  | 0.60 | 0.84 | -0.04 | 0.69 | 0.91 | -0.15 | 0.23 | 0.76 | -0.16 | 0.20 | 0.75 | -0.12 | 0.34 | 0.86 |
| Lachnospiraceae_FCS020_group  | 0.19  | 0.17 | 0.63 | 0.07  | 0.60 | 0.91 | 0.01  | 0.95 | 0.96 | 0.01  | 0.97 | 0.98 | 0.03  | 0.85 | 0.94 |
| Lachnospiraceae_ND3007_group  | -0.12 | 0.20 | 0.63 | -0.15 | 0.08 | 0.68 | -0.19 | 0.04 | 0.55 | -0.20 | 0.03 | 0.47 | -0.17 | 0.07 | 0.80 |
| Lachnospiraceae_NK4A136_group | 0.08  | 0.51 | 0.81 | -0.05 | 0.66 | 0.91 | -0.13 | 0.32 | 0.85 | -0.13 | 0.31 | 0.85 | -0.09 | 0.49 | 0.86 |
| Lachnospiraceae_UCG.001       | 0.06  | 0.54 | 0.82 | 0.01  | 0.92 | 1.00 | -0.06 | 0.59 | 0.87 | -0.05 | 0.63 | 0.88 | -0.02 | 0.83 | 0.94 |
| Lachnospiraceae_UCG.004       | 0.06  | 0.60 | 0.84 | 0.02  | 0.83 | 0.97 | 0.02  | 0.85 | 0.95 | 0.02  | 0.87 | 0.97 | 0.01  | 0.92 | 0.96 |
| Lachnospiraceae_UCG.010       | -0.14 | 0.35 | 0.69 | -0.21 | 0.13 | 0.68 | -0.21 | 0.16 | 0.76 | -0.20 | 0.17 | 0.75 | -0.19 | 0.21 | 0.80 |
| Lactobacillus                 | -0.23 | 0.02 | 0.33 | -0.16 | 0.10 | 0.68 | -0.22 | 0.05 | 0.60 | -0.24 | 0.04 | 0.47 | -0.24 | 0.04 | 0.59 |
| Lactococcus                   | 0.17  | 0.36 | 0.69 | 0.05  | 0.79 | 0.95 | 0.05  | 0.79 | 0.92 | 0.05  | 0.80 | 0.95 | 0.03  | 0.88 | 0.94 |
| Marvinbryantia                | -0.05 | 0.62 | 0.84 | -0.10 | 0.31 | 0.77 | -0.09 | 0.43 | 0.87 | -0.09 | 0.41 | 0.87 | -0.07 | 0.53 | 0.88 |
| Megasphaera                   | -0.06 | 0.37 | 0.70 | 0.01  | 0.89 | 1.00 | 0.05  | 0.52 | 0.87 | 0.05  | 0.51 | 0.88 | 0.03  | 0.69 | 0.91 |
| Monoglobus                    | 0.13  | 0.28 | 0.69 | 0.05  | 0.64 | 0.91 | -0.02 | 0.86 | 0.95 | -0.02 | 0.88 | 0.97 | 0.01  | 0.91 | 0.96 |
| Moryella                      | -0.07 | 0.71 | 0.87 | -0.17 | 0.33 | 0.77 | -0.26 | 0.17 | 0.76 | -0.27 | 0.17 | 0.75 | -0.26 | 0.18 | 0.80 |
| Negativibacillus              | -0.14 | 0.18 | 0.63 | -0.11 | 0.29 | 0.77 | -0.10 | 0.36 | 0.85 | -0.10 | 0.38 | 0.85 | -0.09 | 0.41 | 0.86 |
| NK4A214_group                 | -0.07 | 0.43 | 0.74 | -0.13 | 0.12 | 0.68 | -0.15 | 0.09 | 0.71 | -0.15 | 0.11 | 0.72 | -0.12 | 0.19 | 0.80 |
| Odoribacter                   | 0.15  | 0.05 | 0.49 | 0.08  | 0.31 | 0.77 | 0.08  | 0.34 | 0.85 | 0.08  | 0.33 | 0.85 | 0.09  | 0.29 | 0.86 |
| Oscillibacter                 | 0.15  | 0.32 | 0.69 | 0.13  | 0.36 | 0.77 | 0.07  | 0.65 | 0.87 | 0.09  | 0.58 | 0.88 | 0.12  | 0.45 | 0.86 |
| Oscillospira                  | 0.05  | 0.77 | 0.87 | 0.02  | 0.90 | 1.00 | -0.02 | 0.90 | 0.96 | -0.02 | 0.91 | 0.98 | 0.04  | 0.82 | 0.93 |
| Oxalobacter                   | 0.02  | 0.88 | 0.92 | -0.11 | 0.43 | 0.77 | -0.12 | 0.45 | 0.87 | -0.11 | 0.46 | 0.88 | -0.15 | 0.34 | 0.86 |
| Paludicola                    | 0.08  | 0.60 | 0.84 | -0.01 | 0.95 | 1.00 | -0.02 | 0.89 | 0.96 | -0.01 | 0.97 | 0.98 | 0.02  | 0.93 | 0.96 |
| Parabacteroides               | 0.05  | 0.64 | 0.85 | 0.05  | 0.64 | 0.91 | 0.06  | 0.56 | 0.87 | 0.06  | 0.60 | 0.88 | 0.06  | 0.56 | 0.89 |
| Paraprevotella                | -0.10 | 0.17 | 0.63 | -0.09 | 0.21 | 0.68 | -0.08 | 0.34 | 0.85 | -0.07 | 0.36 | 0.85 | -0.07 | 0.40 | 0.86 |
| Parasutterella                | 0.20  | 0.01 | 0.25 | 0.18  | 0.01 | 0.45 | 0.15  | 0.08 | 0.71 | 0.14  | 0.08 | 0.72 | 0.15  | 0.09 | 0.80 |
| Phascolarctobacterium         | 0.11  | 0.13 | 0.62 | 0.10  | 0.13 | 0.68 | 0.11  | 0.16 | 0.76 | 0.11  | 0.15 | 0.75 | 0.11  | 0.18 | 0.80 |
| Phocaea                       | -0.33 | 0.07 | 0.50 | -0.39 | 0.02 | 0.45 | -0.40 | 0.03 | 0.54 | -0.41 | 0.03 | 0.47 | -0.39 | 0.04 | 0.59 |
| Prevotella                    | -0.06 | 0.32 | 0.69 | -0.05 | 0.44 | 0.77 | -0.02 | 0.75 | 0.90 | -0.02 | 0.78 | 0.93 | -0.02 | 0.81 | 0.93 |
| Romboutsia                    | -0.06 | 0.61 | 0.84 | -0.01 | 0.92 | 1.00 | -0.06 | 0.64 | 0.87 | -0.08 | 0.55 | 0.88 | -0.04 | 0.79 | 0.93 |
| Roseburia                     | -0.07 | 0.60 | 0.84 | -0.10 | 0.41 | 0.77 | -0.25 | 0.07 | 0.71 | -0.25 | 0.07 | 0.72 | -0.22 | 0.12 | 0.80 |
| Rothia                        | -0.32 | 0.19 | 0.63 | -0.32 | 0.16 | 0.68 | -0.40 | 0.11 | 0.71 | -0.42 | 0.09 | 0.72 | -0.37 | 0.15 | 0.80 |
| Ruminococcus                  | 0.07  | 0.41 | 0.73 | 0.00  | 0.96 | 1.00 | -0.06 | 0.54 | 0.87 | -0.05 | 0.57 | 0.88 | -0.03 | 0.77 | 0.93 |
| Sellimonas                    | -0.02 | 0.86 | 0.90 | -0.05 | 0.67 | 0.91 | -0.06 | 0.64 | 0.87 | -0.05 | 0.70 | 0.88 | -0.04 | 0.74 | 0.93 |
| Senegalimassilia              | -0.26 | 0.02 | 0.33 | -0.23 | 0.03 | 0.45 | -0.24 | 0.03 | 0.54 | -0.24 | 0.04 | 0.47 | -0.22 | 0.05 | 0.72 |
| Slackia                       | -0.25 | 0.01 | 0.25 | -0.26 | 0.01 | 0.45 | -0.27 | 0.01 | 0.54 | -0.28 | 0.01 | 0.47 | -0.27 | 0.01 | 0.59 |
| Streptococcus                 | 0.20  | 0.18 | 0.63 | 0.18  | 0.20 | 0.68 | 0.20  | 0.21 | 0.76 | 0.19  | 0.23 | 0.76 | 0.23  | 0.17 | 0.80 |
| Subdoligranulum               | 0.07  | 0.54 | 0.82 | 0.02  | 0.85 | 0.99 | 0.01  | 0.95 | 0.96 | 0.01  | 0.93 | 0.98 | 0.03  | 0.79 | 0.93 |
| Sutterella                    | -0.18 | 0.01 | 0.25 | -0.13 | 0.05 | 0.52 | -0.09 | 0.23 | 0.76 | -0.09 | 0.23 | 0.76 | -0.09 | 0.24 | 0.82 |
| TM7x                          | -0.20 | 0.21 | 0.63 | -0.22 | 0.14 | 0.68 | -0.15 | 0.37 | 0.85 | -0.15 | 0.36 | 0.85 | -0.13 | 0.44 | 0.86 |
| Turicibacter                  | 0.11  | 0.53 | 0.82 | 0.20  | 0.23 | 0.68 | 0.14  | 0.46 | 0.87 | 0.13  | 0.50 | 0.88 | 0.13  | 0.50 | 0.86 |
| Tuzzerella                    | 0.05  | 0.71 | 0.87 | 0.04  | 0.73 | 0.91 | 0.00  | 0.98 | 0.98 | 0.00  | 0.99 | 1.00 | 0.00  | 0.98 | 0.98 |
| UBA1819                       | 0.04  | 0.83 | 0.90 | -0.02 | 0.91 | 1.00 | -0.07 | 0.68 | 0.87 | -0.05 | 0.75 | 0.92 | -0.05 | 0.76 | 0.93 |
| UCG.002                       | 0.07  | 0.36 | 0.69 | 0.00  | 0.99 | 1.00 | -0.02 | 0.79 | 0.92 | -0.02 | 0.84 | 0.96 | 0.00  | 0.98 | 0.98 |
| UCG.003                       | -0.08 | 0.38 | 0.70 | -0.12 | 0.18 | 0.68 | -0.15 | 0.12 | 0.71 | -0.15 | 0.12 | 0.75 | -0.14 | 0.16 | 0.80 |
| UCG.005                       | -0.02 | 0.86 | 0.90 | -0.12 | 0.21 | 0.68 | -0.19 | 0.08 | 0.71 | -0.18 | 0.09 | 0.72 | -0.15 | 0.17 | 0.80 |
| UCG.009                       | 0.00  | 0.98 | 0.99 | -0.12 | 0.43 | 0.77 | -0.22 | 0.19 | 0.76 | -0.23 | 0.18 | 0.75 | -0.20 | 0.25 | 0.83 |
| Veillonella                   | 0.10  | 0.36 | 0.69 | 0.12  | 0.22 | 0.68 | 0.10  | 0.38 | 0.85 | 0.09  | 0.42 | 0.87 | 0.13  | 0.29 | 0.86 |
| Victivallis                   | -0.10 | 0.38 | 0.70 | -0.15 | 0.18 | 0.68 | -0.20 | 0.11 | 0.71 | -0.20 | 0.11 | 0.72 | -0.21 | 0.10 | 0.80 |

Multivariable-adjusted regression models adjusted for:

Model 1: sequencing batch, age, race, gender, study center

Model 2: Model 1, with education



Model 3: Model 2, with physical activity, diet score, medication use, and smoking

Model 4: Model 3 with BMI

Model 5: Model 4 with hypertension and diabetes

eTable 29: Multivariable-adjusted regression coefficients, p-values, and false discovery rate (FDR)-adjusted p-values for genera among Black participants with respect to category fluency.

|                               | Model1 |         |      | Model2 |         |      | Model3 |         |      | Model4 |         |      | Model5 |         |      |
|-------------------------------|--------|---------|------|--------|---------|------|--------|---------|------|--------|---------|------|--------|---------|------|
|                               | beta   | p-value | FDR  | beta   | p-value | FDR  | beta   | p-value | FDR  | beta   | p-value | FDR  | beta   | p-value | FDR  |
| Acetanaerobacterium           | -0.53  | 0.39    | 0.67 | -0.53  | 0.38    | 0.72 | -0.46  | 0.49    | 0.79 | -0.48  | 0.47    | 0.79 | -0.44  | 0.51    | 0.86 |
| Acidaminococcus               | -0.25  | 0.16    | 0.44 | -0.18  | 0.31    | 0.71 | -0.19  | 0.35    | 0.75 | -0.18  | 0.39    | 0.79 | -0.17  | 0.42    | 0.81 |
| Actinomyces                   | -0.85  | 0.08    | 0.36 | -0.72  | 0.13    | 0.52 | -0.75  | 0.16    | 0.69 | -0.76  | 0.16    | 0.72 | -0.78  | 0.16    | 0.77 |
| Adlercreutzia                 | -0.31  | 0.36    | 0.65 | -0.41  | 0.20    | 0.60 | -0.59  | 0.10    | 0.69 | -0.60  | 0.09    | 0.72 | -0.62  | 0.09    | 0.77 |
| Agathobacter                  | -0.08  | 0.85    | 0.94 | -0.13  | 0.74    | 0.90 | -0.29  | 0.51    | 0.79 | -0.25  | 0.57    | 0.86 | -0.21  | 0.64    | 0.88 |
| Akkermansia                   | 0.37   | 0.09    | 0.38 | 0.24   | 0.26    | 0.67 | 0.23   | 0.33    | 0.75 | 0.23   | 0.33    | 0.74 | 0.20   | 0.40    | 0.81 |
| Alistipes                     | 0.44   | 0.23    | 0.52 | 0.32   | 0.38    | 0.72 | 0.07   | 0.85    | 0.99 | 0.08   | 0.83    | 0.98 | 0.09   | 0.81    | 0.93 |
| Allisonella                   | 0.16   | 0.65    | 0.85 | 0.58   | 0.11    | 0.52 | 0.61   | 0.14    | 0.69 | 0.61   | 0.14    | 0.72 | 0.65   | 0.12    | 0.77 |
| Anaerofilum                   | 0.68   | 0.16    | 0.44 | 0.38   | 0.43    | 0.76 | 0.39   | 0.46    | 0.78 | 0.34   | 0.52    | 0.81 | 0.28   | 0.60    | 0.88 |
| Anaerostipes                  | -0.02  | 0.97    | 0.99 | -0.16  | 0.72    | 0.90 | -0.18  | 0.71    | 0.95 | -0.12  | 0.81    | 0.98 | -0.13  | 0.79    | 0.93 |
| Anaerotruncus                 | 0.40   | 0.34    | 0.65 | 0.29   | 0.48    | 0.77 | 0.27   | 0.54    | 0.80 | 0.22   | 0.63    | 0.91 | 0.27   | 0.55    | 0.88 |
| Atopobium                     | -0.88  | 0.22    | 0.52 | -0.71  | 0.31    | 0.71 | -0.90  | 0.25    | 0.69 | -0.83  | 0.29    | 0.72 | -0.77  | 0.33    | 0.81 |
| Bacteroides                   | 0.33   | 0.59    | 0.79 | 0.22   | 0.71    | 0.90 | 0.16   | 0.80    | 0.99 | 0.25   | 0.70    | 0.94 | 0.23   | 0.72    | 0.91 |
| Barnesiella                   | 0.45   | 0.03    | 0.30 | 0.47   | 0.02    | 0.33 | 0.54   | 0.02    | 0.66 | 0.53   | 0.02    | 0.71 | 0.52   | 0.03    | 0.77 |
| Bifidobacterium               | 0.38   | 0.18    | 0.47 | 0.46   | 0.09    | 0.52 | 0.48   | 0.10    | 0.69 | 0.53   | 0.07    | 0.71 | 0.52   | 0.08    | 0.77 |
| Bilophila                     | 0.79   | 0.00    | 0.08 | 0.65   | 0.02    | 0.33 | 0.53   | 0.07    | 0.69 | 0.56   | 0.05    | 0.71 | 0.52   | 0.08    | 0.77 |
| Blautia                       | -0.84  | 0.35    | 0.65 | -0.66  | 0.27    | 0.67 | -1.10  | 0.25    | 0.69 | -1.03  | 0.28    | 0.72 | -1.13  | 0.27    | 0.80 |
| Butyricoccus                  | 0.72   | 0.23    | 0.52 | 0.29   | 0.63    | 0.88 | 0.48   | 0.45    | 0.77 | 0.52   | 0.41    | 0.79 | 0.51   | 0.43    | 0.83 |
| Butyrivimonas                 | 0.70   | 0.00    | 0.08 | 0.63   | 0.01    | 0.33 | 0.74   | 0.00    | 0.38 | 0.73   | 0.00    | 0.41 | 0.76   | 0.00    | 0.33 |
| CAG.56                        | -0.01  | 0.98    | 0.99 | -0.02  | 0.93    | 0.96 | -0.04  | 0.89    | 0.99 | -0.01  | 0.96    | 0.98 | -0.01  | 0.96    | 0.99 |
| Candidatus_Soleiferrea        | 0.10   | 0.85    | 0.94 | 0.01   | 0.98    | 0.98 | -0.03  | 0.95    | 0.99 | -0.04  | 0.95    | 0.98 | 0.00   | 1.00    | 1.00 |
| Caproiciproducens             | -0.33  | 0.48    | 0.75 | -0.43  | 0.36    | 0.72 | -0.47  | 0.37    | 0.76 | -0.49  | 0.34    | 0.74 | -0.54  | 0.30    | 0.80 |
| Catenibacterium               | 0.01   | 0.95    | 0.99 | 0.07   | 0.79    | 0.91 | 0.01   | 0.97    | 0.99 | 0.03   | 0.91    | 0.98 | 0.02   | 0.94    | 0.98 |
| Christensenellaceae_R.7_group | 0.62   | 0.01    | 0.12 | 0.46   | 0.04    | 0.43 | 0.41   | 0.10    | 0.69 | 0.39   | 0.13    | 0.72 | 0.38   | 0.14    | 0.77 |
| Clostridium_sensu_stricto_1   | -0.18  | 0.57    | 0.79 | -0.11  | 0.73    | 0.90 | -0.13  | 0.70    | 0.95 | -0.11  | 0.75    | 0.96 | -0.15  | 0.66    | 0.88 |
| Colidextribacter              | -0.44  | 0.40    | 0.67 | -0.51  | 0.32    | 0.72 | -0.51  | 0.35    | 0.75 | -0.51  | 0.35    | 0.74 | -0.49  | 0.39    | 0.81 |
| Collinsella                   | 0.25   | 0.31    | 0.63 | 0.45   | 0.06    | 0.47 | 0.39   | 0.14    | 0.69 | 0.39   | 0.14    | 0.72 | 0.36   | 0.19    | 0.77 |
| Coprobacter                   | 0.43   | 0.16    | 0.44 | 0.35   | 0.24    | 0.65 | 0.28   | 0.40    | 0.76 | 0.25   | 0.46    | 0.79 | 0.19   | 0.57    | 0.88 |
| Coprococcus                   | 0.09   | 0.77    | 0.92 | 0.16   | 0.60    | 0.88 | 0.29   | 0.37    | 0.76 | 0.30   | 0.34    | 0.74 | 0.34   | 0.29    | 0.80 |
| Defluviitaleaceae_UCG.011     | 0.54   | 0.23    | 0.52 | 0.41   | 0.35    | 0.72 | 0.56   | 0.25    | 0.69 | 0.51   | 0.30    | 0.72 | 0.49   | 0.32    | 0.81 |
| Desulfovibrio                 | 0.29   | 0.23    | 0.52 | 0.29   | 0.21    | 0.60 | 0.23   | 0.38    | 0.76 | 0.19   | 0.47    | 0.79 | 0.19   | 0.48    | 0.85 |
| Dialister                     | -0.28  | 0.15    | 0.44 | -0.24  | 0.20    | 0.60 | -0.23  | 0.28    | 0.72 | -0.22  | 0.29    | 0.72 | -0.19  | 0.37    | 0.81 |
| DNF00809                      | 0.09   | 0.86    | 0.94 | 0.06   | 0.91    | 0.95 | 0.35   | 0.51    | 0.79 | 0.33   | 0.54    | 0.82 | 0.30   | 0.58    | 0.88 |
| Dorea                         | 0.06   | 0.86    | 0.94 | 0.07   | 0.84    | 0.94 | 0.06   | 0.87    | 0.99 | 0.08   | 0.83    | 0.98 | 0.06   | 0.86    | 0.95 |
| DTU089                        | -0.25  | 0.54    | 0.79 | -0.41  | 0.30    | 0.71 | -0.50  | 0.24    | 0.69 | -0.52  | 0.22    | 0.72 | -0.40  | 0.35    | 0.81 |
| Eggerthella                   | -0.98  | 0.01    | 0.13 | -1.10  | 0.00    | 0.29 | -1.03  | 0.01    | 0.61 | -1.03  | 0.01    | 0.63 | -1.03  | 0.01    | 0.69 |
| Eisenbergiella                | -0.09  | 0.82    | 0.94 | -0.13  | 0.73    | 0.90 | -0.14  | 0.73    | 0.95 | -0.18  | 0.65    | 0.92 | -0.19  | 0.63    | 0.88 |
| Enterorhabdus                 | 0.61   | 0.13    | 0.44 | 0.55   | 0.17    | 0.56 | 0.95   | 0.04    | 0.66 | 0.94   | 0.04    | 0.71 | 0.99   | 0.03    | 0.77 |
| Erysipelatoclostridium        | -0.07  | 0.87    | 0.94 | -0.13  | 0.75    | 0.90 | -0.16  | 0.72    | 0.95 | -0.18  | 0.68    | 0.94 | -0.21  | 0.64    | 0.88 |
| Erysipelotrichaceae_UCG.003   | 0.02   | 0.94    | 0.98 | 0.03   | 0.92    | 0.95 | 0.01   | 0.99    | 0.99 | -0.01  | 0.99    | 0.99 | -0.03  | 0.91    | 0.96 |
| Escherichia_Shigella          | -0.41  | 0.13    | 0.44 | -0.25  | 0.35    | 0.72 | -0.35  | 0.24    | 0.69 | -0.33  | 0.27    | 0.72 | -0.36  | 0.25    | 0.79 |
| Faecalibacterium              | 0.45   | 0.35    | 0.65 | 0.19   | 0.68    | 0.90 | 0.18   | 0.72    | 0.95 | 0.22   | 0.65    | 0.92 | 0.25   | 0.62    | 0.88 |
| Family_XIII_AD3011_group      | 0.76   | 0.04    | 0.30 | 0.53   | 0.15    | 0.52 | 0.54   | 0.19    | 0.69 | 0.49   | 0.24    | 0.72 | 0.46   | 0.27    | 0.80 |
| Family_XIII_UCG.001           | 0.81   | 0.08    | 0.36 | 0.74   | 0.10    | 0.52 | 0.74   | 0.13    | 0.69 | 0.69   | 0.16    | 0.72 | 0.65   | 0.19    | 0.77 |
| FD2005                        | -0.76  | 0.06    | 0.36 | -0.52  | 0.20    | 0.60 | -0.51  | 0.25    | 0.69 | -0.51  | 0.25    | 0.72 | -0.47  | 0.30    | 0.80 |
| Flavonifractor                | -0.42  | 0.27    | 0.58 | -0.46  | 0.21    | 0.60 | -0.50  | 0.23    | 0.69 | -0.49  | 0.24    | 0.72 | -0.49  | 0.25    | 0.79 |
| Frisingicoccus                | 0.31   | 0.34    | 0.65 | 0.22   | 0.49    | 0.79 | 0.05   | 0.88    | 0.99 | 0.02   | 0.96    | 0.98 | 0.00   | 1.00    | 1.00 |
| Fusicatenibacter              | 0.16   | 0.58    | 0.79 | 0.10   | 0.72    | 0.90 | -0.08  | 0.80    | 0.99 | -0.04  | 0.90    | 0.98 | -0.14  | 0.67    | 0.88 |
| Fusobacterium                 | -0.07  | 0.86    | 0.94 | 0.12   | 0.76    | 0.90 | 0.20   | 0.65    | 0.93 | 0.16   | 0.71    | 0.95 | 0.20   | 0.65    | 0.88 |
| GCA.900066575                 | 0.80   | 0.06    | 0.36 | 0.59   | 0.15    | 0.52 | 0.58   | 0.20    | 0.69 | 0.54   | 0.24    | 0.72 | 0.58   | 0.22    | 0.79 |
| Gordonibacter                 | 0.31   | 0.49    | 0.75 | 0.06   | 0.90    | 0.95 | 0.25   | 0.59    | 0.86 | 0.19   | 0.70    | 0.94 | 0.12   | 0.81    | 0.93 |
| Granulicatella                | -0.41  | 0.39    | 0.67 | -0.27  | 0.58    | 0.87 | -0.36  | 0.49    | 0.79 | -0.32  | 0.54    | 0.82 | -0.22  | 0.67    | 0.88 |
| Haemophilus                   | 0.27   | 0.36    | 0.65 | 0.21   | 0.46    | 0.77 | 0.06   | 0.86    | 0.99 | 0.07   | 0.83    | 0.98 | 0.12   | 0.72    | 0.91 |
| Harryflintia                  | -0.17  | 0.71    | 0.89 | -0.21  | 0.63    | 0.88 | -0.50  | 0.31    | 0.74 | -0.55  | 0.26    | 0.72 | -0.54  | 0.28    | 0.80 |

|                              |       |      |      |       |      |      |       |      |      |       |      |      |       |      |      |
|------------------------------|-------|------|------|-------|------|------|-------|------|------|-------|------|------|-------|------|------|
| Holdemanela                  | 0.23  | 0.42 | 0.69 | 0.31  | 0.27 | 0.67 | 0.49  | 0.11 | 0.69 | 0.50  | 0.11 | 0.72 | 0.50  | 0.12 | 0.77 |
| Holdemania                   | -0.39 | 0.62 | 0.81 | -0.40 | 0.60 | 0.88 | -0.22 | 0.80 | 0.99 | -0.28 | 0.74 | 0.96 | -0.39 | 0.65 | 0.88 |
| Howardella                   | -0.01 | 0.99 | 0.99 | -0.05 | 0.90 | 0.95 | 0.04  | 0.93 | 0.99 | -0.02 | 0.97 | 0.98 | 0.00  | 1.00 | 1.00 |
| Hungatella                   | -0.57 | 0.13 | 0.44 | -0.57 | 0.12 | 0.52 | -0.57 | 0.16 | 0.69 | -0.56 | 0.16 | 0.72 | -0.53 | 0.20 | 0.77 |
| Hydrogenoanaerobacterium     | 1.20  | 0.00 | 0.09 | 0.91  | 0.03 | 0.39 | 0.99  | 0.04 | 0.66 | 0.93  | 0.05 | 0.71 | 0.89  | 0.06 | 0.77 |
| Incertae_Sedis               | -0.42 | 0.48 | 0.75 | -0.50 | 0.37 | 0.72 | -0.54 | 0.39 | 0.76 | -0.52 | 0.40 | 0.79 | -0.55 | 0.38 | 0.81 |
| Intestinibacter              | -0.30 | 0.44 | 0.71 | -0.29 | 0.45 | 0.76 | -0.35 | 0.40 | 0.76 | -0.28 | 0.52 | 0.81 | -0.28 | 0.51 | 0.86 |
| Intestinimonas               | 1.01  | 0.00 | 0.08 | 0.80  | 0.02 | 0.33 | 0.74  | 0.05 | 0.66 | 0.70  | 0.06 | 0.71 | 0.73  | 0.06 | 0.77 |
| Lachnoclostridium            | -1.66 | 0.02 | 0.25 | -1.29 | 0.07 | 0.47 | -1.11 | 0.15 | 0.69 | -1.06 | 0.17 | 0.72 | -1.08 | 0.16 | 0.77 |
| Lachnospira                  | 0.45  | 0.16 | 0.44 | 0.26  | 0.42 | 0.75 | -0.02 | 0.95 | 0.99 | 0.03  | 0.93 | 0.98 | 0.06  | 0.87 | 0.95 |
| Lachnospiraceae_FCS020_group | 0.68  | 0.08 | 0.36 | 0.45  | 0.24 | 0.65 | 0.53  | 0.21 | 0.69 | 0.54  | 0.19 | 0.72 | 0.49  | 0.25 | 0.79 |
| Lachnospiraceae_ND3007_grou  | 0.43  | 0.09 | 0.38 | 0.37  | 0.14 | 0.52 | 0.32  | 0.23 | 0.69 | 0.36  | 0.18 | 0.72 | 0.37  | 0.19 | 0.77 |
| Lachnospiraceae_NK4A136_gro  | 0.49  | 0.15 | 0.44 | 0.25  | 0.46 | 0.76 | 0.07  | 0.86 | 0.99 | 0.08  | 0.83 | 0.98 | 0.12  | 0.76 | 0.93 |
| Lachnospiraceae_UCG.001      | 0.31  | 0.25 | 0.54 | 0.21  | 0.41 | 0.75 | 0.09  | 0.76 | 0.97 | 0.05  | 0.85 | 0.98 | 0.07  | 0.82 | 0.93 |
| Lachnospiraceae_UCG.004      | 0.39  | 0.19 | 0.47 | 0.33  | 0.27 | 0.67 | 0.25  | 0.43 | 0.77 | 0.26  | 0.41 | 0.79 | 0.27  | 0.40 | 0.81 |
| Lachnospiraceae_UCG.010      | -0.22 | 0.59 | 0.79 | -0.36 | 0.36 | 0.72 | -0.28 | 0.52 | 0.79 | -0.31 | 0.46 | 0.79 | -0.29 | 0.50 | 0.86 |
| Lactobacillus                | -0.19 | 0.52 | 0.78 | -0.05 | 0.87 | 0.94 | -0.11 | 0.73 | 0.95 | -0.05 | 0.87 | 0.98 | -0.05 | 0.88 | 0.95 |
| Lactococcus                  | 1.01  | 0.05 | 0.31 | 0.78  | 0.12 | 0.52 | 0.57  | 0.31 | 0.74 | 0.58  | 0.30 | 0.72 | 0.48  | 0.40 | 0.81 |
| Marvinbryantia               | 0.01  | 0.96 | 0.99 | -0.08 | 0.77 | 0.90 | 0.00  | 0.99 | 0.99 | 0.01  | 0.97 | 0.98 | 0.08  | 0.79 | 0.93 |
| Megasphaera                  | -0.20 | 0.31 | 0.63 | -0.06 | 0.76 | 0.90 | -0.02 | 0.93 | 0.99 | -0.03 | 0.91 | 0.98 | -0.05 | 0.83 | 0.93 |
| Monoglobus                   | 0.34  | 0.30 | 0.63 | 0.19  | 0.55 | 0.85 | -0.04 | 0.91 | 0.99 | -0.05 | 0.88 | 0.98 | -0.13 | 0.73 | 0.91 |
| Moryella                     | 0.41  | 0.41 | 0.68 | 0.23  | 0.64 | 0.88 | 0.08  | 0.88 | 0.99 | 0.09  | 0.88 | 0.98 | 0.09  | 0.87 | 0.95 |
| Negativibacillus             | -0.06 | 0.83 | 0.94 | 0.01  | 0.97 | 0.98 | -0.02 | 0.96 | 0.99 | -0.04 | 0.89 | 0.98 | -0.08 | 0.80 | 0.93 |
| NK4A214_group                | 0.49  | 0.04 | 0.30 | 0.38  | 0.11 | 0.52 | 0.29  | 0.27 | 0.71 | 0.25  | 0.34 | 0.74 | 0.26  | 0.33 | 0.81 |
| Odoribacter                  | 0.63  | 0.00 | 0.08 | 0.50  | 0.02 | 0.33 | 0.38  | 0.12 | 0.69 | 0.37  | 0.12 | 0.72 | 0.38  | 0.12 | 0.77 |
| Oscillibacter                | 0.16  | 0.70 | 0.89 | 0.12  | 0.76 | 0.90 | 0.47  | 0.30 | 0.74 | 0.40  | 0.38 | 0.79 | 0.36  | 0.45 | 0.83 |
| Oscillospira                 | -0.68 | 0.18 | 0.47 | -0.74 | 0.14 | 0.52 | -0.73 | 0.18 | 0.69 | -0.73 | 0.17 | 0.72 | -0.75 | 0.18 | 0.77 |
| Oxalobacter                  | 0.59  | 0.14 | 0.44 | 0.35  | 0.37 | 0.72 | 0.34  | 0.44 | 0.77 | 0.32  | 0.47 | 0.79 | 0.26  | 0.57 | 0.88 |
| Paludicola                   | 0.25  | 0.57 | 0.79 | 0.07  | 0.87 | 0.94 | -0.07 | 0.87 | 0.99 | -0.16 | 0.74 | 0.96 | -0.22 | 0.65 | 0.88 |
| Parabacteroides              | 0.46  | 0.12 | 0.44 | 0.45  | 0.11 | 0.52 | 0.29  | 0.34 | 0.75 | 0.33  | 0.28 | 0.72 | 0.37  | 0.23 | 0.79 |
| Paraprevotella               | 0.02  | 0.92 | 0.97 | 0.05  | 0.81 | 0.92 | 0.04  | 0.87 | 0.99 | 0.02  | 0.95 | 0.98 | 0.03  | 0.91 | 0.96 |
| Parasutterella               | 0.36  | 0.10 | 0.39 | 0.31  | 0.14 | 0.52 | 0.22  | 0.35 | 0.75 | 0.23  | 0.33 | 0.74 | 0.18  | 0.46 | 0.83 |
| Phascolarctobacterium        | 0.44  | 0.03 | 0.30 | 0.43  | 0.03 | 0.39 | 0.48  | 0.03 | 0.66 | 0.46  | 0.04 | 0.71 | 0.45  | 0.05 | 0.77 |
| Phoceia                      | -0.73 | 0.15 | 0.44 | -0.84 | 0.09 | 0.52 | -0.96 | 0.07 | 0.69 | -0.93 | 0.08 | 0.71 | -0.90 | 0.09 | 0.77 |
| Prevotella                   | 0.10  | 0.58 | 0.79 | 0.13  | 0.45 | 0.76 | 0.17  | 0.39 | 0.76 | 0.16  | 0.42 | 0.79 | 0.17  | 0.37 | 0.81 |
| Romboutsia                   | 0.06  | 0.86 | 0.94 | 0.17  | 0.63 | 0.88 | 0.16  | 0.67 | 0.95 | 0.26  | 0.51 | 0.81 | 0.27  | 0.49 | 0.86 |
| Roseburia                    | 0.13  | 0.72 | 0.89 | 0.06  | 0.85 | 0.94 | -0.30 | 0.45 | 0.77 | -0.28 | 0.48 | 0.79 | -0.20 | 0.63 | 0.88 |
| Rothia                       | -0.40 | 0.55 | 0.79 | -0.40 | 0.53 | 0.83 | -0.93 | 0.19 | 0.69 | -0.87 | 0.23 | 0.72 | -0.63 | 0.39 | 0.81 |
| Ruminococcus                 | 0.49  | 0.04 | 0.30 | 0.35  | 0.14 | 0.52 | 0.21  | 0.43 | 0.77 | 0.19  | 0.48 | 0.79 | 0.16  | 0.56 | 0.88 |
| Sellimonas                   | -0.11 | 0.77 | 0.92 | -0.16 | 0.64 | 0.88 | -0.25 | 0.50 | 0.79 | -0.32 | 0.40 | 0.79 | -0.32 | 0.39 | 0.81 |
| Senegalimassilia             | 0.55  | 0.08 | 0.36 | 0.61  | 0.04 | 0.43 | 0.66  | 0.05 | 0.66 | 0.63  | 0.05 | 0.71 | 0.64  | 0.05 | 0.77 |
| Slackia                      | 0.41  | 0.15 | 0.44 | 0.39  | 0.15 | 0.52 | 0.37  | 0.21 | 0.69 | 0.37  | 0.21 | 0.72 | 0.35  | 0.25 | 0.79 |
| Streptococcus                | 0.37  | 0.38 | 0.67 | 0.34  | 0.41 | 0.75 | 0.29  | 0.53 | 0.80 | 0.34  | 0.47 | 0.79 | 0.36  | 0.46 | 0.83 |
| Subdoligranulum              | 0.70  | 0.03 | 0.30 | 0.60  | 0.06 | 0.47 | 0.46  | 0.19 | 0.69 | 0.44  | 0.21 | 0.72 | 0.51  | 0.15 | 0.77 |
| Sutterella                   | -0.17 | 0.37 | 0.67 | -0.08 | 0.69 | 0.90 | -0.09 | 0.68 | 0.95 | -0.08 | 0.69 | 0.94 | -0.06 | 0.78 | 0.93 |
| TM7x                         | -0.79 | 0.08 | 0.36 | -0.83 | 0.06 | 0.47 | -0.63 | 0.19 | 0.69 | -0.61 | 0.20 | 0.72 | -0.67 | 0.16 | 0.77 |
| Turicibacter                 | 0.28  | 0.57 | 0.79 | 0.46  | 0.34 | 0.72 | 0.69  | 0.22 | 0.69 | 0.78  | 0.17 | 0.72 | 0.77  | 0.17 | 0.77 |
| Tuzzerella                   | 0.18  | 0.60 | 0.79 | 0.17  | 0.61 | 0.88 | -0.03 | 0.93 | 0.99 | -0.05 | 0.89 | 0.98 | -0.10 | 0.79 | 0.93 |
| UBA1819                      | 0.09  | 0.84 | 0.94 | -0.01 | 0.97 | 0.98 | 0.02  | 0.96 | 0.99 | -0.07 | 0.89 | 0.98 | -0.05 | 0.92 | 0.96 |
| UCG.002                      | 0.37  | 0.10 | 0.39 | 0.23  | 0.30 | 0.71 | 0.19  | 0.45 | 0.77 | 0.16  | 0.51 | 0.81 | 0.21  | 0.41 | 0.81 |
| UCG.003                      | 0.54  | 0.04 | 0.30 | 0.47  | 0.06 | 0.47 | 0.41  | 0.14 | 0.69 | 0.39  | 0.16 | 0.72 | 0.36  | 0.20 | 0.77 |
| UCG.005                      | 0.82  | 0.00 | 0.08 | 0.65  | 0.02 | 0.33 | 0.58  | 0.05 | 0.66 | 0.55  | 0.07 | 0.71 | 0.55  | 0.08 | 0.77 |
| UCG.009                      | 0.15  | 0.74 | 0.91 | -0.09 | 0.83 | 0.94 | -0.27 | 0.58 | 0.86 | -0.25 | 0.62 | 0.91 | -0.24 | 0.64 | 0.88 |
| Veillonella                  | 0.04  | 0.90 | 0.96 | 0.09  | 0.77 | 0.90 | 0.07  | 0.84 | 0.99 | 0.11  | 0.75 | 0.96 | 0.15  | 0.65 | 0.88 |
| Victivallis                  | -0.12 | 0.71 | 0.89 | -0.21 | 0.50 | 0.80 | -0.39 | 0.28 | 0.72 | -0.40 | 0.27 | 0.72 | -0.43 | 0.24 | 0.79 |

Multivariable-adjusted regression models adjusted for:

Model 1: sequencing batch, age, race, gender, study center

Model 2: Model 1, with education

Model 3: Model 2, with physical activity, diet score, medication use, and smoking

Model 4: Model 3 with BMI

Model 5: Model 4 with hypertension and diabetes

eTable 30: Multivariable-adjusted regression coefficients, p-values, and false discovery rate (FDR)-adjusted p-values for genera among Black participants with respect to letter fluency.

|                               | Model1 |         |      | Model2 |         |      | Model3 |         |      | Model4 |         |      | Model5 |         |      |
|-------------------------------|--------|---------|------|--------|---------|------|--------|---------|------|--------|---------|------|--------|---------|------|
|                               | beta   | p-value | FDR  | beta   | p-value | FDR  | beta   | p-value | FDR  | beta   | p-value | FDR  | beta   | p-value | FDR  |
| Acetanaerobacterium           | 0.16   | 0.92    | 0.99 | 0.15   | 0.92    | 0.99 | 0.65   | 0.70    | 0.93 | 0.66   | 0.70    | 0.94 | 0.93   | 0.58    | 0.91 |
| Acidaminococcus               | -0.34  | 0.47    | 0.79 | -0.14  | 0.75    | 0.97 | -0.17  | 0.74    | 0.93 | -0.18  | 0.73    | 0.94 | -0.09  | 0.86    | 0.96 |
| Actinomyces                   | 0.04   | 0.98    | 0.99 | 0.44   | 0.72    | 0.97 | 0.81   | 0.55    | 0.90 | 0.82   | 0.54    | 0.91 | 1.02   | 0.46    | 0.89 |
| Adlercreutzia                 | 0.10   | 0.91    | 0.99 | -0.19  | 0.82    | 0.99 | 0.12   | 0.89    | 0.99 | 0.13   | 0.88    | 0.99 | 0.24   | 0.79    | 0.93 |
| Agathobacter                  | 0.46   | 0.69    | 0.88 | 0.35   | 0.75    | 0.97 | -0.27  | 0.82    | 0.96 | -0.30  | 0.80    | 0.95 | -0.22  | 0.86    | 0.96 |
| Akkermansia                   | 0.68   | 0.23    | 0.66 | 0.31   | 0.57    | 0.97 | 0.52   | 0.39    | 0.90 | 0.52   | 0.39    | 0.89 | 0.42   | 0.49    | 0.89 |
| Alistipes                     | 0.80   | 0.40    | 0.77 | 0.41   | 0.66    | 0.97 | -0.05  | 0.96    | 0.99 | -0.05  | 0.96    | 0.99 | -0.02  | 0.98    | 0.99 |
| Allisonella                   | -0.15  | 0.87    | 0.99 | 0.98   | 0.30    | 0.82 | 1.21   | 0.24    | 0.89 | 1.21   | 0.24    | 0.85 | 1.27   | 0.23    | 0.89 |
| Anaerofilum                   | 1.39   | 0.27    | 0.69 | 0.56   | 0.65    | 0.97 | 0.95   | 0.47    | 0.90 | 0.99   | 0.45    | 0.89 | 0.87   | 0.51    | 0.90 |
| Anaerostipes                  | -1.04  | 0.39    | 0.77 | -1.44  | 0.22    | 0.82 | -0.81  | 0.51    | 0.90 | -0.86  | 0.49    | 0.89 | -0.91  | 0.48    | 0.89 |
| Anaerotruncus                 | 0.67   | 0.53    | 0.79 | 0.34   | 0.75    | 0.97 | 1.08   | 0.33    | 0.90 | 1.13   | 0.31    | 0.89 | 1.38   | 0.22    | 0.89 |
| Atopobium                     | 0.94   | 0.61    | 0.82 | 1.46   | 0.42    | 0.84 | 0.31   | 0.87    | 0.99 | 0.26   | 0.89    | 0.99 | 0.39   | 0.84    | 0.96 |
| Bacteroides                   | 1.64   | 0.30    | 0.69 | 1.30   | 0.40    | 0.82 | 0.98   | 0.53    | 0.90 | 0.94   | 0.55    | 0.91 | 1.01   | 0.52    | 0.90 |
| Barnesiella                   | 1.20   | 0.03    | 0.45 | 1.29   | 0.01    | 0.71 | 1.19   | 0.04    | 0.89 | 1.20   | 0.04    | 0.85 | 1.15   | 0.05    | 0.89 |
| Bifidobacterium               | 0.61   | 0.41    | 0.77 | 0.89   | 0.21    | 0.82 | 0.95   | 0.20    | 0.89 | 0.93   | 0.21    | 0.85 | 0.85   | 0.26    | 0.89 |
| Bilophila                     | 1.16   | 0.10    | 0.54 | 0.70   | 0.31    | 0.82 | 0.74   | 0.31    | 0.90 | 0.73   | 0.32    | 0.89 | 0.67   | 0.37    | 0.89 |
| Blautia                       | 0.03   | 0.99    | 0.99 | -0.38  | 0.87    | 0.99 | 0.47   | 0.84    | 0.98 | 0.43   | 0.86    | 0.99 | 1.13   | 0.66    | 0.93 |
| Butyricoccus                  | 2.03   | 0.19    | 0.65 | 0.81   | 0.60    | 0.97 | 1.11   | 0.49    | 0.90 | 1.09   | 0.50    | 0.89 | 0.97   | 0.56    | 0.91 |
| Butyrivimonas                 | 1.37   | 0.03    | 0.45 | 1.20   | 0.05    | 0.71 | 1.15   | 0.07    | 0.89 | 1.15   | 0.07    | 0.85 | 1.13   | 0.08    | 0.89 |
| CAG.56                        | -0.01  | 0.99    | 0.99 | -0.04  | 0.96    | 0.99 | 0.32   | 0.66    | 0.93 | 0.31   | 0.67    | 0.94 | 0.36   | 0.63    | 0.91 |
| Candidatus_Soleaferrea        | 0.53   | 0.71    | 0.89 | 0.22   | 0.87    | 0.99 | 0.47   | 0.75    | 0.93 | 0.47   | 0.75    | 0.94 | 0.55   | 0.71    | 0.93 |
| Caproiciproducens             | 1.83   | 0.14    | 0.59 | 1.61   | 0.18    | 0.79 | 0.85   | 0.51    | 0.90 | 0.87   | 0.50    | 0.89 | 0.96   | 0.47    | 0.89 |
| Catenibacterium               | 0.03   | 0.96    | 0.99 | 0.20   | 0.76    | 0.97 | 0.35   | 0.61    | 0.92 | 0.34   | 0.62    | 0.92 | 0.34   | 0.62    | 0.91 |
| Christensenellaceae_R.7_group | 1.22   | 0.04    | 0.47 | 0.79   | 0.18    | 0.79 | 0.70   | 0.27    | 0.89 | 0.73   | 0.25    | 0.85 | 0.77   | 0.24    | 0.89 |
| Clostridium_sensu_stricto_1   | -0.89  | 0.27    | 0.69 | -0.66  | 0.40    | 0.82 | -0.38  | 0.65    | 0.93 | -0.40  | 0.64    | 0.94 | -0.47  | 0.58    | 0.91 |
| Colidextribacter              | -0.07  | 0.96    | 0.99 | -0.29  | 0.83    | 0.99 | -0.43  | 0.75    | 0.93 | -0.43  | 0.76    | 0.94 | -0.26  | 0.85    | 0.96 |
| Collinsella                   | -0.17  | 0.79    | 0.93 | 0.38   | 0.55    | 0.97 | -0.01  | 0.99    | 0.99 | -0.01  | 0.99    | 1.00 | -0.10  | 0.88    | 0.97 |
| Coprobacter                   | 1.15   | 0.16    | 0.64 | 0.85   | 0.28    | 0.82 | 0.46   | 0.59    | 0.92 | 0.49   | 0.57    | 0.92 | 0.30   | 0.73    | 0.93 |
| Coprococcus                   | 0.49   | 0.54    | 0.79 | 0.65   | 0.40    | 0.82 | 0.71   | 0.38    | 0.90 | 0.70   | 0.38    | 0.89 | 0.78   | 0.33    | 0.89 |
| Defluviitaleaceae_UCG.011     | 1.63   | 0.17    | 0.64 | 1.22   | 0.29    | 0.82 | 1.68   | 0.17    | 0.89 | 1.73   | 0.16    | 0.85 | 1.71   | 0.17    | 0.89 |
| Desulfovibrio                 | 0.41   | 0.52    | 0.79 | 0.44   | 0.47    | 0.88 | 0.67   | 0.30    | 0.90 | 0.71   | 0.28    | 0.89 | 0.73   | 0.27    | 0.89 |
| Dialister                     | -0.86  | 0.09    | 0.51 | -0.76  | 0.12    | 0.71 | -0.62  | 0.24    | 0.89 | -0.62  | 0.24    | 0.85 | -0.51  | 0.34    | 0.89 |
| DNF00809                      | -1.40  | 0.30    | 0.69 | -1.52  | 0.25    | 0.82 | -1.01  | 0.47    | 0.90 | -1.00  | 0.47    | 0.89 | -1.04  | 0.46    | 0.89 |
| Dorea                         | 0.48   | 0.59    | 0.82 | 0.49   | 0.57    | 0.97 | 0.55   | 0.54    | 0.90 | 0.54   | 0.55    | 0.91 | 0.48   | 0.59    | 0.91 |
| DTU089                        | 0.79   | 0.45    | 0.79 | 0.36   | 0.73    | 0.97 | -0.06  | 0.96    | 0.99 | -0.05  | 0.96    | 0.99 | 0.30   | 0.78    | 0.93 |
| Eggerthella                   | -1.45  | 0.14    | 0.59 | -1.87  | 0.05    | 0.71 | -1.57  | 0.13    | 0.89 | -1.57  | 0.13    | 0.85 | -1.48  | 0.16    | 0.89 |
| Eisenbergiella                | -1.35  | 0.18    | 0.64 | -1.45  | 0.14    | 0.72 | -1.50  | 0.14    | 0.89 | -1.48  | 0.15    | 0.85 | -1.49  | 0.15    | 0.89 |
| Enterorhabdus                 | 1.79   | 0.09    | 0.51 | 1.64   | 0.11    | 0.71 | 2.62   | 0.02    | 0.73 | 2.62   | 0.02    | 0.74 | 2.62   | 0.02    | 0.83 |
| Erysipelatoclostridium        | 0.60   | 0.58    | 0.82 | 0.41   | 0.70    | 0.97 | 0.30   | 0.78    | 0.95 | 0.31   | 0.78    | 0.94 | 0.31   | 0.78    | 0.93 |
| Erysipelotrichaceae_UCG.003   | 1.13   | 0.13    | 0.59 | 1.14   | 0.12    | 0.71 | 0.76   | 0.32    | 0.90 | 0.77   | 0.31    | 0.89 | 0.68   | 0.38    | 0.89 |
| Escherichia_Shigella          | -0.46  | 0.51    | 0.79 | 0.03   | 0.96    | 0.99 | -0.06  | 0.94    | 0.99 | -0.07  | 0.92    | 0.99 | -0.02  | 0.98    | 0.99 |
| Faecalibacterium              | 0.96   | 0.45    | 0.79 | 0.25   | 0.84    | 0.99 | 0.09   | 0.95    | 0.99 | 0.06   | 0.96    | 0.99 | -0.03  | 0.98    | 0.99 |
| Family_XIII_AD3011_group      | 1.43   | 0.14    | 0.59 | 0.82   | 0.39    | 0.82 | 1.21   | 0.24    | 0.89 | 1.26   | 0.23    | 0.85 | 1.19   | 0.26    | 0.89 |
| Family_XIII_UCG.001           | 1.39   | 0.25    | 0.69 | 1.21   | 0.30    | 0.82 | 1.77   | 0.15    | 0.89 | 1.83   | 0.14    | 0.85 | 1.76   | 0.16    | 0.89 |
| FD2005                        | -0.79  | 0.46    | 0.79 | -0.13  | 0.90    | 0.99 | 0.13   | 0.91    | 0.99 | 0.13   | 0.91    | 0.99 | 0.32   | 0.78    | 0.93 |
| Flavonifractor                | -0.68  | 0.49    | 0.79 | -0.82  | 0.39    | 0.82 | -1.03  | 0.32    | 0.90 | -1.04  | 0.32    | 0.89 | -0.93  | 0.38    | 0.89 |
| Frisingicoccus                | 0.43   | 0.62    | 0.82 | 0.09   | 0.92    | 0.99 | -0.06  | 0.95    | 0.99 | -0.04  | 0.97    | 0.99 | -0.02  | 0.98    | 0.99 |
| Fusicatenibacter              | 0.22   | 0.77    | 0.93 | 0.03   | 0.96    | 0.99 | -0.51  | 0.52    | 0.90 | -0.54  | 0.50    | 0.89 | -0.75  | 0.36    | 0.89 |
| Fusobacterium                 | 0.55   | 0.61    | 0.82 | 1.03   | 0.33    | 0.82 | 0.70   | 0.53    | 0.90 | 0.72   | 0.51    | 0.89 | 0.80   | 0.48    | 0.89 |
| GCA.900066575                 | 2.01   | 0.07    | 0.47 | 1.47   | 0.17    | 0.79 | 1.35   | 0.24    | 0.89 | 1.40   | 0.23    | 0.85 | 1.46   | 0.21    | 0.89 |
| Gordonibacter                 | 1.79   | 0.13    | 0.59 | 1.03   | 0.38    | 0.82 | 1.47   | 0.23    | 0.89 | 1.54   | 0.21    | 0.85 | 1.44   | 0.25    | 0.89 |
| Granulicatella                | -0.02  | 0.99    | 0.99 | 0.44   | 0.72    | 0.97 | 1.00   | 0.45    | 0.90 | 0.97   | 0.46    | 0.89 | 1.24   | 0.36    | 0.89 |
| Haemophilus                   | 0.25   | 0.74    | 0.91 | 0.12   | 0.87    | 0.99 | 0.22   | 0.78    | 0.95 | 0.21   | 0.79    | 0.94 | 0.26   | 0.75    | 0.93 |
| Harryflintia                  | -1.15  | 0.33    | 0.69 | -1.25  | 0.27    | 0.82 | -1.17  | 0.35    | 0.90 | -1.15  | 0.36    | 0.89 | -1.03  | 0.41    | 0.89 |

|                               |       |      |      |       |      |      |       |      |      |       |      |      |       |      |      |
|-------------------------------|-------|------|------|-------|------|------|-------|------|------|-------|------|------|-------|------|------|
| Holdemanella                  | 0.53  | 0.48 | 0.79 | 0.78  | 0.28 | 0.82 | 1.45  | 0.06 | 0.89 | 1.45  | 0.06 | 0.85 | 1.54  | 0.05 | 0.89 |
| Holdemania                    | -2.36 | 0.27 | 0.69 | -2.50 | 0.22 | 0.82 | -1.49 | 0.50 | 0.90 | -1.46 | 0.51 | 0.89 | -1.80 | 0.42 | 0.89 |
| Howardella                    | -1.21 | 0.23 | 0.67 | -1.32 | 0.18 | 0.79 | -0.90 | 0.39 | 0.90 | -0.88 | 0.41 | 0.89 | -0.74 | 0.49 | 0.89 |
| Hungatella                    | -1.54 | 0.12 | 0.59 | -1.53 | 0.11 | 0.71 | -1.71 | 0.09 | 0.89 | -1.71 | 0.09 | 0.85 | -1.62 | 0.11 | 0.89 |
| Hydrogenoanaerobacterium      | 2.25  | 0.04 | 0.47 | 1.42  | 0.20 | 0.82 | 1.39  | 0.24 | 0.89 | 1.47  | 0.22 | 0.85 | 1.39  | 0.25 | 0.89 |
| Incertae_Sedis                | 0.27  | 0.86 | 0.99 | 0.08  | 0.96 | 0.99 | 0.52  | 0.74 | 0.93 | 0.51  | 0.75 | 0.94 | 0.57  | 0.72 | 0.93 |
| Intestinibacter               | -0.66 | 0.52 | 0.79 | -0.59 | 0.55 | 0.97 | -0.69 | 0.51 | 0.90 | -0.77 | 0.47 | 0.89 | -0.83 | 0.44 | 0.89 |
| Intestinimonas                | 0.90  | 0.31 | 0.69 | 0.27  | 0.76 | 0.97 | 0.67  | 0.48 | 0.90 | 0.70  | 0.47 | 0.89 | 0.77  | 0.42 | 0.89 |
| Lachnoclostridium             | -1.85 | 0.33 | 0.69 | -0.82 | 0.66 | 0.97 | 0.24  | 0.90 | 0.99 | 0.21  | 0.91 | 0.99 | 0.15  | 0.94 | 0.99 |
| Lachnospira                   | 0.78  | 0.35 | 0.71 | 0.24  | 0.77 | 0.98 | 0.04  | 0.97 | 0.99 | 0.00  | 1.00 | 1.00 | 0.06  | 0.95 | 0.99 |
| Lachnospiraceae_FCS020_group  | 2.88  | 0.00 | 0.24 | 2.27  | 0.02 | 0.71 | 2.66  | 0.01 | 0.59 | 2.66  | 0.01 | 0.61 | 2.63  | 0.01 | 0.73 |
| Lachnospiraceae_ND3007_group  | 1.28  | 0.05 | 0.47 | 1.12  | 0.08 | 0.71 | 1.07  | 0.11 | 0.89 | 1.06  | 0.12 | 0.85 | 1.08  | 0.12 | 0.89 |
| Lachnospiraceae_NK4A136_group | 0.31  | 0.72 | 0.89 | -0.39 | 0.65 | 0.97 | -0.38 | 0.69 | 0.93 | -0.38 | 0.69 | 0.94 | -0.31 | 0.75 | 0.93 |
| Lachnospiraceae_UCG.001       | 0.30  | 0.67 | 0.87 | 0.02  | 0.98 | 0.99 | 0.19  | 0.80 | 0.96 | 0.21  | 0.78 | 0.94 | 0.26  | 0.73 | 0.93 |
| Lachnospiraceae_UCG.004       | 0.23  | 0.77 | 0.93 | 0.06  | 0.94 | 0.99 | 0.18  | 0.82 | 0.96 | 0.18  | 0.83 | 0.97 | 0.21  | 0.80 | 0.93 |
| Lachnospiraceae_UCG.010       | -0.57 | 0.58 | 0.82 | -0.96 | 0.35 | 0.82 | -0.82 | 0.44 | 0.90 | -0.80 | 0.45 | 0.89 | -0.83 | 0.44 | 0.89 |
| Lactobacillus                 | -0.54 | 0.47 | 0.79 | -0.13 | 0.86 | 0.99 | -0.28 | 0.72 | 0.93 | -0.33 | 0.69 | 0.94 | -0.36 | 0.67 | 0.93 |
| Lactococcus                   | 2.77  | 0.04 | 0.47 | 2.16  | 0.09 | 0.71 | 2.60  | 0.06 | 0.89 | 2.59  | 0.06 | 0.85 | 2.33  | 0.10 | 0.89 |
| Marvinbryantia                | 0.78  | 0.28 | 0.69 | 0.52  | 0.46 | 0.88 | 0.27  | 0.72 | 0.93 | 0.27  | 0.73 | 0.94 | 0.46  | 0.56 | 0.91 |
| Megasphaera                   | -0.43 | 0.41 | 0.77 | -0.02 | 0.96 | 0.99 | 0.05  | 0.93 | 0.99 | 0.05  | 0.93 | 0.99 | 0.03  | 0.96 | 0.99 |
| Monoglobus                    | 0.84  | 0.32 | 0.69 | 0.41  | 0.62 | 0.97 | 0.46  | 0.61 | 0.92 | 0.46  | 0.60 | 0.92 | 0.34  | 0.71 | 0.93 |
| Moryella                      | 1.61  | 0.22 | 0.65 | 1.14  | 0.37 | 0.82 | 0.69  | 0.62 | 0.92 | 0.69  | 0.62 | 0.92 | 0.76  | 0.59 | 0.91 |
| Negativibacillus              | 1.03  | 0.18 | 0.64 | 1.21  | 0.11 | 0.71 | 1.23  | 0.12 | 0.89 | 1.25  | 0.11 | 0.85 | 1.34  | 0.10 | 0.89 |
| NK4A214_group                 | 0.81  | 0.20 | 0.65 | 0.52  | 0.40 | 0.82 | 0.21  | 0.75 | 0.93 | 0.24  | 0.71 | 0.94 | 0.27  | 0.69 | 0.93 |
| Odoribacter                   | 1.43  | 0.01 | 0.41 | 1.08  | 0.05 | 0.71 | 0.70  | 0.24 | 0.89 | 0.70  | 0.24 | 0.85 | 0.77  | 0.21 | 0.89 |
| Oscillibacter                 | -0.09 | 0.93 | 0.99 | -0.22 | 0.83 | 0.99 | 0.60  | 0.60 | 0.92 | 0.66  | 0.56 | 0.92 | 0.66  | 0.58 | 0.91 |
| Oscillospira                  | 1.42  | 0.29 | 0.69 | 1.19  | 0.36 | 0.82 | 1.16  | 0.39 | 0.90 | 1.16  | 0.39 | 0.89 | 1.45  | 0.30 | 0.89 |
| Oxalobacter                   | 1.42  | 0.18 | 0.64 | 0.76  | 0.46 | 0.88 | 1.25  | 0.26 | 0.89 | 1.27  | 0.26 | 0.85 | 1.23  | 0.28 | 0.89 |
| Paludicola                    | 1.42  | 0.21 | 0.65 | 0.86  | 0.44 | 0.87 | 0.96  | 0.42 | 0.90 | 1.03  | 0.39 | 0.89 | 0.94  | 0.44 | 0.89 |
| Parabacteroides               | 1.37  | 0.07 | 0.47 | 1.31  | 0.08 | 0.71 | 0.89  | 0.24 | 0.89 | 0.88  | 0.25 | 0.85 | 0.96  | 0.21 | 0.89 |
| Paraprevotella                | -0.03 | 0.95 | 0.99 | 0.05  | 0.92 | 0.99 | -0.10 | 0.87 | 0.99 | -0.08 | 0.89 | 0.99 | 0.01  | 0.99 | 0.99 |
| Parasutterella                | 0.72  | 0.20 | 0.65 | 0.59  | 0.28 | 0.82 | 0.64  | 0.28 | 0.90 | 0.64  | 0.29 | 0.89 | 0.51  | 0.40 | 0.89 |
| Phascolarctobacterium         | 1.51  | 0.00 | 0.24 | 1.48  | 0.00 | 0.42 | 1.70  | 0.00 | 0.22 | 1.72  | 0.00 | 0.20 | 1.66  | 0.00 | 0.37 |
| Phocaea                       | -0.15 | 0.91 | 0.99 | -0.45 | 0.72 | 0.97 | -0.69 | 0.60 | 0.92 | -0.71 | 0.59 | 0.92 | -0.56 | 0.68 | 0.93 |
| Prevotella                    | -0.35 | 0.46 | 0.79 | -0.25 | 0.58 | 0.97 | -0.23 | 0.64 | 0.93 | -0.22 | 0.65 | 0.94 | -0.18 | 0.71 | 0.93 |
| Romboutsia                    | -1.64 | 0.07 | 0.47 | -1.31 | 0.14 | 0.72 | -1.24 | 0.19 | 0.89 | -1.34 | 0.17 | 0.85 | -1.44 | 0.15 | 0.89 |
| Roseburia                     | 0.55  | 0.55 | 0.80 | 0.35  | 0.70 | 0.97 | -0.15 | 0.88 | 0.99 | -0.16 | 0.87 | 0.99 | 0.05  | 0.96 | 0.99 |
| Rothia                        | -0.67 | 0.70 | 0.88 | -0.64 | 0.70 | 0.97 | -1.34 | 0.45 | 0.90 | -1.40 | 0.44 | 0.89 | -0.93 | 0.61 | 0.91 |
| Ruminococcus                  | 0.49  | 0.43 | 0.79 | 0.08  | 0.89 | 0.99 | 0.22  | 0.74 | 0.93 | 0.23  | 0.73 | 0.94 | 0.16  | 0.81 | 0.94 |
| Sellimonas                    | 0.10  | 0.91 | 0.99 | -0.01 | 0.99 | 0.99 | -0.54 | 0.56 | 0.91 | -0.51 | 0.58 | 0.92 | -0.46 | 0.62 | 0.91 |
| Senegalimassilia              | 0.67  | 0.41 | 0.77 | 0.87  | 0.27 | 0.82 | 0.98  | 0.23 | 0.89 | 1.00  | 0.22 | 0.85 | 1.04  | 0.21 | 0.89 |
| Slackia                       | 0.31  | 0.67 | 0.87 | 0.31  | 0.66 | 0.97 | 0.55  | 0.45 | 0.90 | 0.55  | 0.46 | 0.89 | 0.50  | 0.50 | 0.89 |
| Streptococcus                 | 0.02  | 0.99 | 0.99 | -0.03 | 0.98 | 0.99 | 0.93  | 0.42 | 0.90 | 0.91  | 0.43 | 0.89 | 0.82  | 0.50 | 0.89 |
| Subdoligranulum               | 1.54  | 0.07 | 0.47 | 1.25  | 0.13 | 0.72 | 1.14  | 0.19 | 0.89 | 1.15  | 0.19 | 0.85 | 1.41  | 0.11 | 0.89 |
| Sutterella                    | -0.14 | 0.79 | 0.93 | 0.16  | 0.75 | 0.97 | -0.01 | 0.98 | 0.99 | -0.02 | 0.98 | 0.99 | 0.01  | 0.99 | 0.99 |
| TM7x                          | -1.23 | 0.29 | 0.69 | -1.36 | 0.23 | 0.82 | -0.51 | 0.67 | 0.93 | -0.53 | 0.66 | 0.94 | -0.60 | 0.62 | 0.91 |
| Turicibacter                  | -0.66 | 0.61 | 0.82 | -0.17 | 0.89 | 0.99 | 0.56  | 0.68 | 0.93 | 0.52  | 0.71 | 0.94 | 0.49  | 0.72 | 0.93 |
| Tuzzerella                    | 1.64  | 0.07 | 0.47 | 1.54  | 0.08 | 0.71 | 1.21  | 0.21 | 0.89 | 1.22  | 0.20 | 0.85 | 1.15  | 0.23 | 0.89 |
| UBA1819                       | 0.77  | 0.51 | 0.79 | 0.43  | 0.71 | 0.97 | 0.91  | 0.45 | 0.90 | 0.99  | 0.42 | 0.89 | 1.25  | 0.32 | 0.89 |
| UCG.002                       | 1.32  | 0.02 | 0.45 | 0.95  | 0.10 | 0.71 | 0.68  | 0.27 | 0.89 | 0.71  | 0.26 | 0.85 | 0.86  | 0.18 | 0.89 |
| UCG.003                       | 1.26  | 0.06 | 0.47 | 1.06  | 0.11 | 0.71 | 0.97  | 0.17 | 0.89 | 0.98  | 0.16 | 0.85 | 0.87  | 0.22 | 0.89 |
| UCG.005                       | 1.73  | 0.02 | 0.41 | 1.28  | 0.07 | 0.71 | 1.33  | 0.08 | 0.89 | 1.39  | 0.07 | 0.85 | 1.42  | 0.07 | 0.89 |
| UCG.009                       | 0.13  | 0.91 | 0.99 | -0.54 | 0.64 | 0.97 | -0.98 | 0.43 | 0.90 | -1.00 | 0.42 | 0.89 | -0.99 | 0.43 | 0.89 |
| Veillonella                   | -0.84 | 0.28 | 0.69 | -0.66 | 0.38 | 0.82 | -0.51 | 0.53 | 0.90 | -0.53 | 0.52 | 0.89 | -0.59 | 0.49 | 0.89 |
| Victivallis                   | -0.52 | 0.54 | 0.79 | -0.76 | 0.35 | 0.82 | -1.07 | 0.23 | 0.89 | -1.06 | 0.24 | 0.85 | -1.10 | 0.22 | 0.89 |

Multivariable-adjusted regression models adjusted for:

Model 1: sequencing batch, age, race, gender, study center

Model 2: Model 1, with education

Model 3: Model 2, with physical activity, diet score, medication use, and smoking

Model 4: Model 3 with BMI

Model 5: Model 4 with hypertension and diabetes

eTable 31: Multivariable-adjusted regression coefficients, p-values, and false discovery rate (FDR)-adjusted p-values for genera among Black participants with respect to MOCA.

|                               | Model2 |         |      | Model2 |         |      | Model3 |         |      | Model4 |         |      | Model5 |         |      |
|-------------------------------|--------|---------|------|--------|---------|------|--------|---------|------|--------|---------|------|--------|---------|------|
|                               | beta   | p-value | FDR  | beta   | p-value | FDR  | beta   | p-value | FDR  | beta   | p-value | FDR  | beta   | p-value | FDR  |
| Acetanaerobacterium           | -0.26  | 0.59    | 0.77 | -0.25  | 0.57    | 0.80 | -0.40  | 0.39    | 0.85 | -0.39  | 0.41    | 0.87 | -0.37  | 0.44    | 0.83 |
| Acidaminococcus               | -0.23  | 0.11    | 0.37 | -0.13  | 0.31    | 0.79 | -0.08  | 0.59    | 0.89 | -0.09  | 0.55    | 0.88 | -0.06  | 0.67    | 0.91 |
| Actinomyces                   | -0.53  | 0.16    | 0.43 | -0.37  | 0.30    | 0.79 | -0.38  | 0.32    | 0.85 | -0.37  | 0.33    | 0.83 | -0.23  | 0.55    | 0.87 |
| Adlercreutzia                 | 0.27   | 0.30    | 0.57 | 0.15   | 0.54    | 0.80 | 0.01   | 0.97    | 0.99 | 0.02   | 0.95    | 0.98 | 0.06   | 0.83    | 0.97 |
| Agathobacter                  | -0.50  | 0.12    | 0.38 | -0.57  | 0.06    | 0.75 | -0.60  | 0.05    | 0.70 | -0.63  | 0.04    | 0.60 | -0.57  | 0.07    | 0.62 |
| Akkermansia                   | 0.41   | 0.01    | 0.24 | 0.26   | 0.11    | 0.79 | 0.20   | 0.24    | 0.85 | 0.20   | 0.24    | 0.78 | 0.19   | 0.25    | 0.79 |
| Alistipes                     | 0.37   | 0.20    | 0.47 | 0.22   | 0.43    | 0.80 | 0.09   | 0.73    | 0.97 | 0.09   | 0.75    | 0.94 | 0.09   | 0.73    | 0.96 |
| Allisonella                   | -0.52  | 0.07    | 0.30 | -0.07  | 0.79    | 0.96 | -0.08  | 0.77    | 0.99 | -0.09  | 0.77    | 0.94 | -0.16  | 0.59    | 0.87 |
| Anaerofilum                   | 0.33   | 0.38    | 0.62 | -0.04  | 0.91    | 0.98 | -0.07  | 0.85    | 0.99 | -0.04  | 0.91    | 0.98 | 0.00   | 1.00    | 1.00 |
| Anaerostipes                  | 0.13   | 0.71    | 0.83 | -0.04  | 0.90    | 0.98 | -0.08  | 0.81    | 0.99 | -0.12  | 0.73    | 0.94 | -0.02  | 0.95    | 1.00 |
| Anaerotruncus                 | 0.59   | 0.07    | 0.30 | 0.46   | 0.13    | 0.79 | 0.69   | 0.03    | 0.56 | 0.73   | 0.02    | 0.40 | 0.82   | 0.01    | 0.27 |
| Atopobium                     | 0.08   | 0.88    | 0.93 | 0.29   | 0.57    | 0.80 | -0.05  | 0.93    | 0.99 | -0.10  | 0.86    | 0.98 | 0.00   | 1.00    | 1.00 |
| Bacteroides                   | 0.36   | 0.46    | 0.70 | 0.23   | 0.61    | 0.80 | 0.20   | 0.65    | 0.94 | 0.16   | 0.73    | 0.94 | 0.15   | 0.74    | 0.96 |
| Barnesiella                   | -0.03  | 0.84    | 0.91 | -0.01  | 0.97    | 1.00 | 0.10   | 0.55    | 0.89 | 0.10   | 0.53    | 0.88 | 0.10   | 0.54    | 0.87 |
| Bifidobacterium               | -0.02  | 0.93    | 0.95 | 0.08   | 0.70    | 0.87 | 0.11   | 0.60    | 0.89 | 0.09   | 0.68    | 0.94 | 0.08   | 0.69    | 0.92 |
| Bilophila                     | 0.29   | 0.18    | 0.45 | 0.10   | 0.62    | 0.80 | -0.07  | 0.72    | 0.97 | -0.09  | 0.66    | 0.93 | -0.04  | 0.86    | 0.99 |
| Blautia                       | -0.33  | 0.64    | 0.79 | -0.48  | 0.46    | 0.80 | -0.36  | 0.59    | 0.89 | -0.40  | 0.55    | 0.88 | -0.08  | 0.91    | 1.00 |
| Butyricoccus                  | 0.26   | 0.58    | 0.77 | -0.28  | 0.53    | 0.80 | -0.43  | 0.35    | 0.85 | -0.45  | 0.32    | 0.83 | -0.37  | 0.43    | 0.83 |
| Butyricimonas                 | 0.24   | 0.21    | 0.47 | 0.15   | 0.40    | 0.80 | 0.25   | 0.16    | 0.84 | 0.25   | 0.16    | 0.71 | 0.23   | 0.21    | 0.76 |
| CAG.56                        | -0.11  | 0.60    | 0.77 | -0.13  | 0.50    | 0.80 | -0.08  | 0.70    | 0.96 | -0.10  | 0.64    | 0.93 | -0.05  | 0.80    | 0.97 |
| Candidatus_Soleaferrea        | 0.04   | 0.92    | 0.95 | -0.07  | 0.87    | 0.98 | -0.03  | 0.95    | 0.99 | -0.02  | 0.95    | 0.98 | 0.04   | 0.93    | 1.00 |
| Caproiciproducens             | 0.06   | 0.87    | 0.93 | -0.05  | 0.89    | 0.98 | -0.05  | 0.90    | 0.99 | -0.03  | 0.93    | 0.98 | 0.10   | 0.80    | 0.97 |
| Catenibacterium               | -0.43  | 0.03    | 0.24 | -0.37  | 0.04    | 0.68 | -0.27  | 0.16    | 0.84 | -0.29  | 0.14    | 0.71 | -0.27  | 0.17    | 0.69 |
| Christensenellaceae_R.7_group | 0.41   | 0.02    | 0.24 | 0.21   | 0.21    | 0.79 | 0.23   | 0.20    | 0.84 | 0.25   | 0.16    | 0.71 | 0.33   | 0.08    | 0.62 |
| Clostridium_sensu_stricto_1   | -0.25  | 0.30    | 0.57 | -0.17  | 0.46    | 0.80 | -0.19  | 0.41    | 0.85 | -0.21  | 0.37    | 0.87 | -0.16  | 0.49    | 0.87 |
| Colidextribacter              | -0.37  | 0.37    | 0.62 | -0.45  | 0.24    | 0.79 | -0.27  | 0.49    | 0.89 | -0.27  | 0.49    | 0.87 | -0.12  | 0.76    | 0.97 |
| Collinsella                   | -0.25  | 0.19    | 0.45 | -0.03  | 0.85    | 0.98 | -0.04  | 0.84    | 0.99 | -0.04  | 0.84    | 0.98 | -0.05  | 0.81    | 0.97 |
| Coprobacter                   | 0.35   | 0.15    | 0.41 | 0.25   | 0.26    | 0.79 | 0.30   | 0.19    | 0.84 | 0.33   | 0.16    | 0.71 | 0.32   | 0.17    | 0.69 |
| Coprococcus                   | -0.05  | 0.84    | 0.91 | 0.03   | 0.89    | 0.98 | 0.19   | 0.41    | 0.85 | 0.18   | 0.43    | 0.87 | 0.19   | 0.40    | 0.83 |
| Defluviitaleaceae_UCG.011     | 0.72   | 0.04    | 0.25 | 0.56   | 0.09    | 0.79 | 0.55   | 0.11    | 0.84 | 0.58   | 0.09    | 0.71 | 0.62   | 0.08    | 0.62 |
| Desulfovibrio                 | -0.09  | 0.64    | 0.79 | -0.08  | 0.64    | 0.81 | 0.00   | 0.99    | 0.99 | 0.02   | 0.91    | 0.98 | 0.00   | 0.99    | 1.00 |
| Dialister                     | -0.25  | 0.09    | 0.34 | -0.21  | 0.15    | 0.79 | -0.21  | 0.16    | 0.84 | -0.21  | 0.16    | 0.71 | -0.18  | 0.24    | 0.78 |
| DNF00809                      | -0.28  | 0.49    | 0.71 | -0.32  | 0.39    | 0.80 | 0.13   | 0.74    | 0.97 | 0.14   | 0.71    | 0.94 | 0.19   | 0.63    | 0.87 |
| Dorea                         | 0.16   | 0.56    | 0.76 | 0.16   | 0.51    | 0.80 | 0.22   | 0.38    | 0.85 | 0.21   | 0.40    | 0.87 | 0.20   | 0.43    | 0.83 |
| DTU089                        | 0.34   | 0.28    | 0.55 | 0.15   | 0.60    | 0.80 | 0.12   | 0.69    | 0.96 | 0.13   | 0.66    | 0.93 | 0.16   | 0.60    | 0.87 |
| Eggerthella                   | -0.30  | 0.32    | 0.59 | -0.44  | 0.11    | 0.79 | -0.27  | 0.35    | 0.85 | -0.27  | 0.35    | 0.84 | -0.22  | 0.45    | 0.84 |
| Eisenbergiella                | 0.07   | 0.82    | 0.91 | 0.02   | 0.95    | 1.00 | 0.03   | 0.93    | 0.99 | 0.05   | 0.86    | 0.98 | 0.07   | 0.82    | 0.97 |
| Enterorhabdus                 | 0.30   | 0.35    | 0.62 | 0.21   | 0.47    | 0.80 | 0.43   | 0.18    | 0.84 | 0.43   | 0.18    | 0.71 | 0.46   | 0.16    | 0.69 |
| Erysipelatoclostridium        | 0.24   | 0.47    | 0.71 | 0.17   | 0.59    | 0.80 | 0.28   | 0.36    | 0.85 | 0.30   | 0.34    | 0.84 | 0.32   | 0.30    | 0.79 |
| Erysipelotrichaceae_UCG.003   | 0.31   | 0.17    | 0.45 | 0.31   | 0.13    | 0.79 | 0.17   | 0.44    | 0.86 | 0.17   | 0.42    | 0.87 | 0.22   | 0.32    | 0.79 |
| Escherichia_Shigella          | -0.08  | 0.70    | 0.83 | 0.13   | 0.53    | 0.80 | 0.04   | 0.84    | 0.99 | 0.03   | 0.89    | 0.98 | -0.03  | 0.90    | 1.00 |
| Faecalibacterium              | 0.70   | 0.06    | 0.30 | 0.39   | 0.27    | 0.79 | 0.37   | 0.29    | 0.85 | 0.35   | 0.32    | 0.83 | 0.44   | 0.22    | 0.76 |
| Family_XIII_AD3011_group      | 0.50   | 0.08    | 0.34 | 0.22   | 0.42    | 0.80 | 0.35   | 0.23    | 0.85 | 0.39   | 0.19    | 0.71 | 0.44   | 0.14    | 0.69 |
| Family_XIII_UCG.001           | 0.36   | 0.32    | 0.59 | 0.27   | 0.42    | 0.80 | 0.33   | 0.35    | 0.85 | 0.36   | 0.30    | 0.83 | 0.38   | 0.28    | 0.79 |
| FD2005                        | -0.57  | 0.07    | 0.32 | -0.27  | 0.37    | 0.80 | -0.26  | 0.41    | 0.85 | -0.26  | 0.41    | 0.87 | -0.27  | 0.39    | 0.82 |
| Flavonifractor                | -0.10  | 0.74    | 0.85 | -0.16  | 0.57    | 0.80 | -0.02  | 0.95    | 0.99 | -0.02  | 0.94    | 0.98 | 0.09   | 0.77    | 0.97 |
| Frisingicoccus                | 0.64   | 0.01    | 0.24 | 0.53   | 0.03    | 0.53 | 0.42   | 0.09    | 0.84 | 0.44   | 0.07    | 0.71 | 0.50   | 0.04    | 0.58 |
| Fusicatenibacter              | -0.13  | 0.56    | 0.76 | -0.21  | 0.33    | 0.79 | -0.35  | 0.12    | 0.84 | -0.38  | 0.09    | 0.71 | -0.33  | 0.15    | 0.69 |
| Fusobacterium                 | -0.47  | 0.14    | 0.41 | -0.23  | 0.43    | 0.80 | -0.27  | 0.39    | 0.85 | -0.25  | 0.42    | 0.87 | -0.32  | 0.30    | 0.79 |
| GCA.900066575                 | 0.78   | 0.02    | 0.24 | 0.53   | 0.09    | 0.79 | 0.41   | 0.20    | 0.84 | 0.44   | 0.17    | 0.71 | 0.54   | 0.10    | 0.68 |
| Gordonibacter                 | 0.31   | 0.37    | 0.62 | 0.00   | 1.00    | 1.00 | 0.02   | 0.96    | 0.99 | 0.06   | 0.86    | 0.98 | 0.10   | 0.78    | 0.97 |
| Granulicatella                | -0.24  | 0.53    | 0.73 | -0.05  | 0.88    | 0.98 | -0.23  | 0.53    | 0.89 | -0.26  | 0.48    | 0.87 | -0.21  | 0.58    | 0.87 |
| Haemophilus                   | 0.32   | 0.16    | 0.43 | 0.25   | 0.25    | 0.79 | -0.01  | 0.96    | 0.99 | -0.02  | 0.94    | 0.98 | 0.02   | 0.93    | 1.00 |
| Harryflintia                  | -0.13  | 0.71    | 0.83 | -0.19  | 0.57    | 0.80 | -0.25  | 0.47    | 0.87 | -0.22  | 0.53    | 0.88 | -0.17  | 0.62    | 0.87 |



|                              |       |      |      |       |      |      |       |      |      |       |      |      |       |      |      |
|------------------------------|-------|------|------|-------|------|------|-------|------|------|-------|------|------|-------|------|------|
| Holdemanela                  | -0.14 | 0.52 | 0.73 | -0.05 | 0.81 | 0.96 | 0.23  | 0.30 | 0.85 | 0.23  | 0.30 | 0.83 | 0.21  | 0.34 | 0.82 |
| Holdemania                   | -0.49 | 0.43 | 0.67 | -0.51 | 0.38 | 0.80 | -0.47 | 0.43 | 0.86 | -0.44 | 0.46 | 0.87 | -0.41 | 0.50 | 0.87 |
| Howardella                   | -0.33 | 0.28 | 0.55 | -0.39 | 0.18 | 0.79 | -0.23 | 0.45 | 0.86 | -0.20 | 0.50 | 0.87 | -0.15 | 0.61 | 0.87 |
| Hungatella                   | -0.22 | 0.45 | 0.70 | -0.22 | 0.42 | 0.80 | -0.17 | 0.55 | 0.89 | -0.18 | 0.54 | 0.88 | -0.19 | 0.51 | 0.87 |
| Hydrogenoanaerobacterium     | 0.79  | 0.02 | 0.24 | 0.41  | 0.20 | 0.79 | 0.35  | 0.30 | 0.85 | 0.40  | 0.23 | 0.78 | 0.48  | 0.16 | 0.69 |
| Incertae_Sedis               | 0.13  | 0.77 | 0.87 | 0.03  | 0.95 | 1.00 | 0.23  | 0.61 | 0.89 | 0.22  | 0.62 | 0.93 | 0.29  | 0.51 | 0.87 |
| Intestinibacter              | 0.21  | 0.49 | 0.71 | 0.23  | 0.42 | 0.80 | 0.18  | 0.54 | 0.89 | 0.13  | 0.65 | 0.93 | 0.17  | 0.56 | 0.87 |
| Intestinimonas               | 0.44  | 0.10 | 0.35 | 0.16  | 0.52 | 0.80 | 0.03  | 0.91 | 0.99 | 0.05  | 0.84 | 0.98 | 0.07  | 0.79 | 0.97 |
| Lachnoclostridium            | -1.19 | 0.04 | 0.25 | -0.72 | 0.17 | 0.79 | -0.62 | 0.25 | 0.85 | -0.66 | 0.22 | 0.78 | -0.70 | 0.20 | 0.76 |
| Lachnospira                  | 0.56  | 0.02 | 0.24 | 0.33  | 0.17 | 0.79 | -0.05 | 0.83 | 0.99 | -0.09 | 0.73 | 0.94 | 0.01  | 0.97 | 1.00 |
| Lachnospiraceae_FCS020_group | 0.90  | 0.00 | 0.11 | 0.62  | 0.03 | 0.53 | 0.60  | 0.04 | 0.70 | 0.59  | 0.04 | 0.60 | 0.68  | 0.02 | 0.43 |
| Lachnospiraceae_ND3007_group | 0.18  | 0.38 | 0.62 | 0.10  | 0.59 | 0.80 | 0.16  | 0.39 | 0.85 | 0.14  | 0.45 | 0.87 | 0.22  | 0.26 | 0.79 |
| Lachnospiraceae_NK4A136_grou | 0.31  | 0.24 | 0.50 | 0.01  | 0.97 | 1.00 | -0.31 | 0.25 | 0.85 | -0.32 | 0.23 | 0.78 | -0.24 | 0.38 | 0.82 |
| Lachnospiraceae_UCG.001      | 0.32  | 0.12 | 0.38 | 0.21  | 0.29 | 0.79 | 0.03  | 0.90 | 0.99 | 0.05  | 0.82 | 0.98 | 0.10  | 0.62 | 0.87 |
| Lachnospiraceae_UCG.004      | 0.49  | 0.04 | 0.25 | 0.41  | 0.06 | 0.75 | 0.33  | 0.14 | 0.84 | 0.33  | 0.14 | 0.71 | 0.34  | 0.13 | 0.69 |
| Lachnospiraceae_UCG.010      | 0.13  | 0.67 | 0.82 | -0.03 | 0.91 | 0.98 | -0.03 | 0.92 | 0.99 | -0.01 | 0.97 | 0.98 | 0.00  | 0.99 | 1.00 |
| Lactobacillus                | -0.43 | 0.06 | 0.29 | -0.27 | 0.21 | 0.79 | -0.27 | 0.23 | 0.85 | -0.31 | 0.17 | 0.71 | -0.34 | 0.15 | 0.69 |
| Lactococcus                  | 0.81  | 0.04 | 0.25 | 0.52  | 0.16 | 0.79 | 0.54  | 0.17 | 0.84 | 0.54  | 0.17 | 0.71 | 0.51  | 0.20 | 0.76 |
| Marvinbryantia               | 0.24  | 0.28 | 0.55 | 0.13  | 0.53 | 0.80 | 0.41  | 0.06 | 0.72 | 0.40  | 0.07 | 0.71 | 0.47  | 0.03 | 0.50 |
| Megasphaera                  | -0.38 | 0.02 | 0.24 | -0.21 | 0.16 | 0.79 | -0.12 | 0.45 | 0.86 | -0.11 | 0.47 | 0.87 | -0.14 | 0.37 | 0.82 |
| Monoglobus                   | 0.45  | 0.08 | 0.32 | 0.27  | 0.25 | 0.79 | 0.07  | 0.78 | 0.99 | 0.08  | 0.76 | 0.94 | 0.15  | 0.56 | 0.87 |
| Moryella                     | 0.21  | 0.59 | 0.77 | -0.02 | 0.96 | 1.00 | 0.04  | 0.92 | 0.99 | 0.04  | 0.93 | 0.98 | 0.04  | 0.93 | 1.00 |
| Negativibacillus             | -0.09 | 0.70 | 0.83 | 0.00  | 1.00 | 1.00 | 0.09  | 0.69 | 0.96 | 0.10  | 0.64 | 0.93 | 0.18  | 0.42 | 0.83 |
| NK4A214_group                | 0.25  | 0.19 | 0.45 | 0.12  | 0.51 | 0.80 | 0.08  | 0.66 | 0.94 | 0.11  | 0.56 | 0.88 | 0.17  | 0.38 | 0.82 |
| Odoribacter                  | 0.37  | 0.03 | 0.24 | 0.20  | 0.22 | 0.79 | 0.18  | 0.29 | 0.85 | 0.18  | 0.28 | 0.83 | 0.20  | 0.24 | 0.78 |
| Oscillibacter                | 0.28  | 0.39 | 0.63 | 0.23  | 0.44 | 0.80 | 0.44  | 0.16 | 0.84 | 0.50  | 0.12 | 0.71 | 0.65  | 0.05 | 0.58 |
| Oscillospira                 | -0.01 | 0.98 | 0.98 | -0.08 | 0.83 | 0.98 | 0.01  | 0.98 | 0.99 | 0.01  | 0.97 | 0.98 | 0.19  | 0.63 | 0.87 |
| Oxalobacter                  | 0.16  | 0.62 | 0.79 | -0.15 | 0.61 | 0.80 | -0.18 | 0.56 | 0.89 | -0.17 | 0.59 | 0.90 | -0.23 | 0.48 | 0.87 |
| Paludicola                   | 0.52  | 0.13 | 0.38 | 0.31  | 0.33 | 0.79 | 0.18  | 0.58 | 0.89 | 0.24  | 0.48 | 0.87 | 0.30  | 0.38 | 0.82 |
| Parabacteroides              | 0.15  | 0.53 | 0.73 | 0.14  | 0.52 | 0.80 | 0.14  | 0.51 | 0.89 | 0.12  | 0.57 | 0.88 | 0.13  | 0.55 | 0.87 |
| Paraprevotella               | -0.15 | 0.34 | 0.61 | -0.12 | 0.42 | 0.80 | -0.25 | 0.13 | 0.84 | -0.23 | 0.15 | 0.71 | -0.20 | 0.23 | 0.78 |
| Parasutterella               | 0.59  | 0.00 | 0.03 | 0.53  | 0.00 | 0.04 | 0.45  | 0.01 | 0.33 | 0.44  | 0.01 | 0.30 | 0.44  | 0.01 | 0.27 |
| Phascolarctobacterium        | 0.34  | 0.03 | 0.24 | 0.33  | 0.03 | 0.53 | 0.30  | 0.05 | 0.70 | 0.32  | 0.04 | 0.60 | 0.28  | 0.08 | 0.62 |
| Phocaea                      | -0.66 | 0.10 | 0.34 | -0.80 | 0.03 | 0.53 | -0.88 | 0.02 | 0.50 | -0.89 | 0.02 | 0.40 | -0.85 | 0.02 | 0.43 |
| Prevotella                   | -0.17 | 0.23 | 0.49 | -0.13 | 0.32 | 0.79 | -0.12 | 0.37 | 0.85 | -0.11 | 0.40 | 0.87 | -0.12 | 0.38 | 0.82 |
| Romboutsia                   | -0.46 | 0.09 | 0.34 | -0.34 | 0.18 | 0.79 | -0.29 | 0.27 | 0.85 | -0.36 | 0.19 | 0.71 | -0.29 | 0.31 | 0.79 |
| Roseburia                    | 0.34  | 0.22 | 0.48 | 0.27  | 0.30 | 0.79 | -0.07 | 0.80 | 0.99 | -0.08 | 0.77 | 0.94 | -0.01 | 0.97 | 1.00 |
| Rothia                       | -0.86 | 0.10 | 0.34 | -0.87 | 0.07 | 0.78 | -1.31 | 0.01 | 0.33 | -1.37 | 0.01 | 0.30 | -1.35 | 0.01 | 0.27 |
| Ruminococcus                 | 0.36  | 0.06 | 0.29 | 0.18  | 0.30 | 0.79 | 0.13  | 0.47 | 0.87 | 0.15  | 0.43 | 0.87 | 0.21  | 0.27 | 0.79 |
| Sellimonas                   | 0.06  | 0.83 | 0.91 | -0.01 | 0.98 | 1.00 | 0.06  | 0.83 | 0.99 | 0.09  | 0.73 | 0.94 | 0.14  | 0.60 | 0.87 |
| Senegalimassilia             | -0.30 | 0.22 | 0.48 | -0.23 | 0.31 | 0.79 | -0.14 | 0.55 | 0.89 | -0.12 | 0.60 | 0.91 | -0.09 | 0.69 | 0.92 |
| Slackia                      | -0.10 | 0.65 | 0.79 | -0.11 | 0.57 | 0.80 | -0.05 | 0.81 | 0.99 | -0.05 | 0.80 | 0.97 | -0.04 | 0.86 | 0.99 |
| Streptococcus                | 0.24  | 0.48 | 0.71 | 0.19  | 0.53 | 0.80 | 0.03  | 0.93 | 0.99 | 0.01  | 0.99 | 0.99 | 0.01  | 0.96 | 1.00 |
| Subdoligranulum              | 0.38  | 0.14 | 0.40 | 0.26  | 0.27 | 0.79 | 0.37  | 0.13 | 0.84 | 0.39  | 0.12 | 0.71 | 0.47  | 0.06 | 0.62 |
| Sutterella                   | -0.59 | 0.00 | 0.01 | -0.48 | 0.00 | 0.04 | -0.46 | 0.00 | 0.21 | -0.46 | 0.00 | 0.20 | -0.48 | 0.00 | 0.15 |
| TM7x                         | -0.05 | 0.90 | 0.94 | -0.09 | 0.78 | 0.95 | 0.12  | 0.72 | 0.97 | 0.11  | 0.73 | 0.94 | 0.18  | 0.60 | 0.87 |
| Turicibacter                 | -0.02 | 0.96 | 0.97 | 0.19  | 0.59 | 0.80 | 0.44  | 0.25 | 0.85 | 0.41  | 0.30 | 0.83 | 0.41  | 0.30 | 0.79 |
| Tuzzerella                   | 0.36  | 0.18 | 0.45 | 0.35  | 0.17 | 0.79 | 0.36  | 0.18 | 0.84 | 0.37  | 0.16 | 0.71 | 0.39  | 0.14 | 0.69 |
| UBA1819                      | 0.24  | 0.49 | 0.71 | 0.12  | 0.72 | 0.89 | 0.20  | 0.54 | 0.89 | 0.26  | 0.44 | 0.87 | 0.35  | 0.31 | 0.79 |
| UCG.002                      | 0.37  | 0.04 | 0.25 | 0.20  | 0.24 | 0.79 | 0.18  | 0.29 | 0.85 | 0.20  | 0.25 | 0.81 | 0.25  | 0.16 | 0.69 |
| UCG.003                      | 0.18  | 0.38 | 0.62 | 0.09  | 0.63 | 0.81 | 0.00  | 0.99 | 0.99 | 0.01  | 0.96 | 0.98 | 0.03  | 0.88 | 1.00 |
| UCG.005                      | 0.48  | 0.02 | 0.24 | 0.26  | 0.20 | 0.79 | 0.21  | 0.34 | 0.85 | 0.24  | 0.27 | 0.83 | 0.32  | 0.15 | 0.69 |
| UCG.009                      | 0.10  | 0.77 | 0.87 | -0.19 | 0.56 | 0.80 | -0.33 | 0.33 | 0.85 | -0.35 | 0.31 | 0.83 | -0.31 | 0.38 | 0.82 |
| Veillonella                  | -0.01 | 0.96 | 0.97 | 0.05  | 0.83 | 0.98 | -0.13 | 0.56 | 0.89 | -0.16 | 0.49 | 0.87 | -0.15 | 0.52 | 0.87 |
| Victivallis                  | -0.26 | 0.32 | 0.59 | -0.37 | 0.12 | 0.79 | -0.42 | 0.10 | 0.84 | -0.42 | 0.10 | 0.71 | -0.43 | 0.09 | 0.67 |

Multivariable-adjusted regression models adjusted for:

Model 1: sequencing batch, age, race, gender, study center

Model 2: Model 1, with education

Model 3: Model 2, with physical activity, diet score, medication use, and smoking

Model 4: Model 3 with BMI

Model 5: Model 4 with hypertension and diabetes

eTable 32: Multivariable-adjusted regression coefficients, p-values, and false discovery rate (FDR)-adjusted p-values for genera among Black participants with respect to PC (1st).

|                               | Model1 |         |      | Model2 |         |      | Model3 |         |      | Model4 |         |      | Model5 |         |      |
|-------------------------------|--------|---------|------|--------|---------|------|--------|---------|------|--------|---------|------|--------|---------|------|
|                               | beta   | p-value | FDR  | beta   | p-value | FDR  | beta   | p-value | FDR  | beta   | p-value | FDR  | beta   | p-value | FDR  |
| Acetanaerobacterium           | -0.05  | 0.81    | 0.86 | -0.04  | 0.81    | 0.87 | -0.06  | 0.74    | 0.89 | -0.06  | 0.75    | 0.89 | -0.06  | 0.77    | 0.92 |
| Acidaminococcus               | -0.09  | 0.11    | 0.29 | -0.05  | 0.34    | 0.67 | -0.02  | 0.73    | 0.89 | -0.02  | 0.72    | 0.89 | -0.01  | 0.81    | 0.93 |
| Actinomyces                   | -0.26  | 0.10    | 0.29 | -0.18  | 0.21    | 0.61 | -0.15  | 0.33    | 0.75 | -0.15  | 0.34    | 0.74 | -0.12  | 0.47    | 0.86 |
| Adlercreutzia                 | 0.13   | 0.24    | 0.44 | 0.07   | 0.48    | 0.75 | 0.05   | 0.64    | 0.89 | 0.05   | 0.63    | 0.89 | 0.06   | 0.60    | 0.87 |
| Agathobacter                  | -0.10  | 0.47    | 0.64 | -0.13  | 0.30    | 0.67 | -0.21  | 0.11    | 0.75 | -0.21  | 0.11    | 0.74 | -0.18  | 0.17    | 0.73 |
| Akkermansia                   | 0.21   | 0.00    | 0.05 | 0.14   | 0.03    | 0.36 | 0.14   | 0.06    | 0.60 | 0.14   | 0.06    | 0.60 | 0.14   | 0.06    | 0.55 |
| Alistipes                     | 0.18   | 0.12    | 0.31 | 0.11   | 0.31    | 0.67 | 0.04   | 0.74    | 0.89 | 0.04   | 0.74    | 0.89 | 0.04   | 0.72    | 0.92 |
| Allisonella                   | -0.21  | 0.07    | 0.26 | 0.01   | 0.96    | 0.96 | 0.05   | 0.70    | 0.89 | 0.05   | 0.70    | 0.89 | 0.04   | 0.75    | 0.92 |
| Anaerofilum                   | 0.33   | 0.04    | 0.17 | 0.15   | 0.29    | 0.67 | 0.16   | 0.31    | 0.75 | 0.16   | 0.29    | 0.74 | 0.17   | 0.27    | 0.77 |
| Anaerostipes                  | 0.04   | 0.77    | 0.85 | -0.04  | 0.77    | 0.86 | -0.01  | 0.93    | 0.96 | -0.02  | 0.90    | 0.94 | 0.00   | 0.98    | 1.00 |
| Anaerotruncus                 | 0.28   | 0.04    | 0.17 | 0.21   | 0.07    | 0.45 | 0.24   | 0.07    | 0.65 | 0.25   | 0.06    | 0.61 | 0.29   | 0.03    | 0.49 |
| Atopobium                     | -0.07  | 0.75    | 0.85 | 0.03   | 0.90    | 0.92 | -0.09  | 0.70    | 0.89 | -0.10  | 0.68    | 0.89 | -0.03  | 0.89    | 0.97 |
| Bacteroides                   | 0.19   | 0.35    | 0.54 | 0.12   | 0.49    | 0.76 | 0.12   | 0.54    | 0.89 | 0.11   | 0.55    | 0.89 | 0.10   | 0.59    | 0.87 |
| Barnesiella                   | 0.12   | 0.09    | 0.28 | 0.13   | 0.03    | 0.36 | 0.14   | 0.05    | 0.60 | 0.14   | 0.05    | 0.60 | 0.14   | 0.04    | 0.49 |
| Bifidobacterium               | 0.06   | 0.49    | 0.67 | 0.11   | 0.18    | 0.58 | 0.12   | 0.18    | 0.75 | 0.12   | 0.19    | 0.74 | 0.12   | 0.19    | 0.73 |
| Bilophila                     | 0.16   | 0.06    | 0.23 | 0.08   | 0.34    | 0.67 | 0.04   | 0.66    | 0.89 | 0.04   | 0.68    | 0.89 | 0.04   | 0.66    | 0.90 |
| Blautia                       | 0.17   | 0.55    | 0.71 | 0.10   | 0.70    | 0.86 | 0.15   | 0.60    | 0.89 | 0.14   | 0.61    | 0.89 | 0.27   | 0.38    | 0.82 |
| Butyricoccus                  | 0.39   | 0.05    | 0.20 | 0.14   | 0.44    | 0.74 | 0.10   | 0.61    | 0.89 | 0.10   | 0.62    | 0.89 | 0.12   | 0.53    | 0.87 |
| Butyrimonas                   | 0.18   | 0.02    | 0.10 | 0.14   | 0.04    | 0.37 | 0.16   | 0.03    | 0.51 | 0.16   | 0.03    | 0.49 | 0.16   | 0.03    | 0.49 |
| CAG.56                        | -0.05  | 0.56    | 0.71 | -0.06  | 0.44    | 0.74 | -0.08  | 0.34    | 0.75 | -0.08  | 0.33    | 0.74 | -0.06  | 0.46    | 0.86 |
| Candidatus_Soleaferrea        | 0.29   | 0.10    | 0.29 | 0.24   | 0.14    | 0.58 | 0.25   | 0.15    | 0.75 | 0.25   | 0.15    | 0.74 | 0.27   | 0.12    | 0.66 |
| Caproiciproducens             | 0.11   | 0.46    | 0.63 | 0.06   | 0.65    | 0.84 | 0.00   | 0.98    | 0.98 | 0.00   | 0.99    | 0.99 | 0.03   | 0.86    | 0.97 |
| Catenibacterium               | -0.07  | 0.37    | 0.55 | -0.05  | 0.54    | 0.77 | -0.03  | 0.72    | 0.89 | -0.03  | 0.71    | 0.89 | -0.03  | 0.72    | 0.92 |
| Christensenellaceae_R.7_group | 0.23   | 0.00    | 0.05 | 0.14   | 0.04    | 0.37 | 0.10   | 0.20    | 0.75 | 0.10   | 0.19    | 0.74 | 0.13   | 0.10    | 0.66 |
| Clostridium_sensu_stricto_1   | -0.08  | 0.41    | 0.59 | -0.04  | 0.64    | 0.84 | -0.07  | 0.51    | 0.89 | -0.07  | 0.50    | 0.89 | -0.06  | 0.52    | 0.87 |
| Colidextribacter              | -0.10  | 0.57    | 0.72 | -0.13  | 0.39    | 0.70 | -0.07  | 0.69    | 0.89 | -0.07  | 0.69    | 0.89 | 0.00   | 0.99    | 1.00 |
| Collinsella                   | -0.13  | 0.10    | 0.29 | -0.03  | 0.73    | 0.86 | -0.04  | 0.58    | 0.89 | -0.04  | 0.58    | 0.89 | -0.05  | 0.52    | 0.87 |
| Coprobacter                   | 0.13   | 0.20    | 0.43 | 0.08   | 0.36    | 0.67 | 0.05   | 0.64    | 0.89 | 0.05   | 0.62    | 0.89 | 0.04   | 0.72    | 0.92 |
| Coprococcus                   | 0.01   | 0.89    | 0.92 | 0.05   | 0.57    | 0.79 | 0.07   | 0.44    | 0.86 | 0.07   | 0.45    | 0.88 | 0.09   | 0.36    | 0.81 |
| DeFluviitaleaceae_UCG.011     | 0.42   | 0.00    | 0.05 | 0.35   | 0.01    | 0.23 | 0.33   | 0.02    | 0.51 | 0.33   | 0.02    | 0.49 | 0.35   | 0.02    | 0.49 |
| Desulfovibrio                 | 0.03   | 0.72    | 0.84 | 0.03   | 0.65    | 0.84 | 0.04   | 0.57    | 0.89 | 0.05   | 0.54    | 0.89 | 0.05   | 0.55    | 0.87 |
| Dialister                     | -0.10  | 0.11    | 0.29 | -0.08  | 0.18    | 0.58 | -0.07  | 0.29    | 0.75 | -0.07  | 0.29    | 0.74 | -0.05  | 0.42    | 0.85 |
| DNF00809                      | -0.03  | 0.88    | 0.92 | -0.04  | 0.76    | 0.86 | 0.04   | 0.78    | 0.90 | 0.05   | 0.77    | 0.89 | 0.05   | 0.76    | 0.92 |
| Dorea                         | 0.03   | 0.75    | 0.85 | 0.04   | 0.71    | 0.86 | 0.06   | 0.58    | 0.89 | 0.06   | 0.59    | 0.89 | 0.05   | 0.63    | 0.87 |
| DTU089                        | 0.15   | 0.23    | 0.44 | 0.06   | 0.59    | 0.80 | 0.02   | 0.85    | 0.91 | 0.03   | 0.84    | 0.90 | 0.06   | 0.63    | 0.87 |
| Eggerthella                   | -0.08  | 0.51    | 0.68 | -0.15  | 0.18    | 0.58 | -0.08  | 0.52    | 0.89 | -0.08  | 0.52    | 0.89 | -0.06  | 0.60    | 0.87 |
| Eisenbergiella                | -0.01  | 0.95    | 0.98 | -0.03  | 0.79    | 0.87 | 0.00   | 0.98    | 0.98 | 0.01   | 0.96    | 0.98 | 0.01   | 0.96    | 1.00 |
| Enterorhabdus                 | 0.19   | 0.15    | 0.35 | 0.15   | 0.22    | 0.62 | 0.19   | 0.16    | 0.75 | 0.19   | 0.16    | 0.74 | 0.22   | 0.12    | 0.66 |
| Erysipelatoclostridium        | 0.15   | 0.28    | 0.47 | 0.11   | 0.36    | 0.67 | 0.15   | 0.25    | 0.75 | 0.15   | 0.25    | 0.74 | 0.15   | 0.26    | 0.77 |
| Erysipelotrichaceae_UCG.003   | 0.10   | 0.29    | 0.48 | 0.10   | 0.23    | 0.63 | 0.03   | 0.74    | 0.89 | 0.03   | 0.73    | 0.89 | 0.04   | 0.63    | 0.87 |
| Escherichia_Shigella          | -0.05  | 0.55    | 0.71 | 0.05   | 0.57    | 0.79 | 0.03   | 0.73    | 0.89 | 0.03   | 0.74    | 0.89 | 0.01   | 0.89    | 0.97 |
| Faecalibacterium              | 0.27   | 0.07    | 0.26 | 0.13   | 0.37    | 0.67 | 0.08   | 0.60    | 0.89 | 0.07   | 0.61    | 0.89 | 0.11   | 0.46    | 0.86 |
| Family_XIII_AD3011_group      | 0.30   | 0.01    | 0.09 | 0.16   | 0.14    | 0.58 | 0.15   | 0.21    | 0.75 | 0.16   | 0.19    | 0.74 | 0.17   | 0.16    | 0.73 |
| Family_XIII_UCG.001           | 0.24   | 0.11    | 0.29 | 0.20   | 0.14    | 0.58 | 0.17   | 0.25    | 0.75 | 0.18   | 0.23    | 0.74 | 0.18   | 0.24    | 0.77 |
| FD2005                        | -0.22  | 0.10    | 0.29 | -0.08  | 0.52    | 0.77 | -0.11  | 0.38    | 0.78 | -0.11  | 0.39    | 0.78 | -0.10  | 0.46    | 0.86 |
| Flavonifractor                | -0.04  | 0.72    | 0.84 | -0.07  | 0.52    | 0.77 | -0.01  | 0.91    | 0.96 | -0.01  | 0.91    | 0.94 | 0.02   | 0.90    | 0.97 |
| Frisingicoccus                | 0.19   | 0.07    | 0.25 | 0.14   | 0.15    | 0.58 | 0.10   | 0.32    | 0.75 | 0.11   | 0.30    | 0.74 | 0.12   | 0.25    | 0.77 |
| Fuscatenibacter               | 0.00   | 0.96    | 0.98 | -0.04  | 0.64    | 0.84 | -0.10  | 0.31    | 0.75 | -0.10  | 0.29    | 0.74 | -0.10  | 0.29    | 0.77 |
| Fusobacterium                 | -0.15  | 0.24    | 0.45 | -0.04  | 0.73    | 0.86 | -0.03  | 0.81    | 0.90 | -0.03  | 0.82    | 0.90 | -0.04  | 0.74    | 0.92 |
| GCA.900066575                 | 0.33   | 0.01    | 0.09 | 0.21   | 0.08    | 0.49 | 0.14   | 0.30    | 0.75 | 0.15   | 0.29    | 0.74 | 0.18   | 0.19    | 0.73 |
| Gordonibacter                 | 0.30   | 0.04    | 0.18 | 0.15   | 0.25    | 0.63 | 0.17   | 0.23    | 0.75 | 0.18   | 0.21    | 0.74 | 0.17   | 0.23    | 0.77 |
| Granulicatella                | -0.12  | 0.44    | 0.62 | -0.03  | 0.81    | 0.87 | -0.04  | 0.80    | 0.90 | -0.04  | 0.79    | 0.89 | 0.00   | 1.00    | 1.00 |
| Haemophilus                   | 0.11   | 0.22    | 0.44 | 0.08   | 0.36    | 0.67 | 0.02   | 0.81    | 0.90 | 0.02   | 0.82    | 0.90 | 0.05   | 0.60    | 0.87 |
| Harryflintia                  | 0.04   | 0.77    | 0.85 | 0.02   | 0.90    | 0.92 | -0.03  | 0.83    | 0.91 | -0.03  | 0.85    | 0.90 | 0.00   | 0.99    | 1.00 |

|                               |       |      |      |       |      |      |       |      |      |       |      |      |       |      |      |
|-------------------------------|-------|------|------|-------|------|------|-------|------|------|-------|------|------|-------|------|------|
| Holdemanella                  | -0.03 | 0.71 | 0.84 | 0.01  | 0.91 | 0.92 | 0.09  | 0.35 | 0.75 | 0.09  | 0.35 | 0.74 | 0.08  | 0.43 | 0.85 |
| Holdemania                    | 0.10  | 0.70 | 0.84 | 0.09  | 0.69 | 0.86 | 0.12  | 0.64 | 0.89 | 0.12  | 0.63 | 0.89 | 0.11  | 0.68 | 0.91 |
| Howardella                    | -0.13 | 0.31 | 0.50 | -0.15 | 0.18 | 0.58 | -0.13 | 0.29 | 0.75 | -0.13 | 0.31 | 0.74 | -0.11 | 0.37 | 0.81 |
| Hungatella                    | -0.15 | 0.21 | 0.44 | -0.15 | 0.17 | 0.58 | -0.12 | 0.33 | 0.75 | -0.12 | 0.33 | 0.74 | -0.11 | 0.36 | 0.81 |
| Hydrogenoanaerobacterium      | 0.37  | 0.01 | 0.06 | 0.19  | 0.13 | 0.58 | 0.17  | 0.23 | 0.75 | 0.18  | 0.21 | 0.74 | 0.19  | 0.18 | 0.73 |
| Incertae_Sedis                | 0.16  | 0.38 | 0.57 | 0.11  | 0.50 | 0.77 | 0.11  | 0.54 | 0.89 | 0.11  | 0.54 | 0.89 | 0.13  | 0.50 | 0.87 |
| Intestinibacter               | 0.04  | 0.75 | 0.85 | 0.05  | 0.66 | 0.84 | 0.04  | 0.74 | 0.89 | 0.04  | 0.78 | 0.89 | 0.04  | 0.74 | 0.92 |
| Intestinimonas                | 0.32  | 0.00 | 0.05 | 0.20  | 0.05 | 0.38 | 0.17  | 0.13 | 0.75 | 0.17  | 0.12 | 0.74 | 0.19  | 0.10 | 0.66 |
| Lachnoclostridium             | -0.57 | 0.01 | 0.09 | -0.35 | 0.10 | 0.53 | -0.21 | 0.36 | 0.76 | -0.21 | 0.35 | 0.74 | -0.24 | 0.29 | 0.77 |
| Lachnospira                   | 0.20  | 0.05 | 0.20 | 0.09  | 0.34 | 0.67 | -0.04 | 0.67 | 0.89 | -0.05 | 0.64 | 0.89 | -0.02 | 0.87 | 0.97 |
| Lachnospiraceae_FCS020_group  | 0.44  | 0.00 | 0.04 | 0.31  | 0.01 | 0.22 | 0.29  | 0.02 | 0.51 | 0.29  | 0.02 | 0.49 | 0.31  | 0.01 | 0.49 |
| Lachnospiraceae_ND3007_group  | 0.09  | 0.27 | 0.46 | 0.06  | 0.46 | 0.74 | 0.03  | 0.66 | 0.89 | 0.03  | 0.68 | 0.89 | 0.06  | 0.47 | 0.86 |
| Lachnospiraceae_NK4A136_group | 0.13  | 0.22 | 0.44 | -0.01 | 0.91 | 0.92 | -0.13 | 0.26 | 0.75 | -0.13 | 0.26 | 0.74 | -0.09 | 0.43 | 0.85 |
| Lachnospiraceae_UCG.001       | 0.14  | 0.11 | 0.29 | 0.08  | 0.30 | 0.67 | 0.01  | 0.88 | 0.93 | 0.02  | 0.85 | 0.90 | 0.04  | 0.63 | 0.87 |
| Lachnospiraceae_UCG.004       | 0.14  | 0.14 | 0.33 | 0.10  | 0.24 | 0.63 | 0.09  | 0.35 | 0.75 | 0.09  | 0.35 | 0.74 | 0.10  | 0.32 | 0.77 |
| Lachnospiraceae_UCG.010       | -0.03 | 0.80 | 0.86 | -0.11 | 0.33 | 0.67 | -0.14 | 0.27 | 0.75 | -0.14 | 0.28 | 0.74 | -0.13 | 0.32 | 0.77 |
| Lactobacillus                 | -0.16 | 0.08 | 0.28 | -0.08 | 0.33 | 0.67 | -0.11 | 0.25 | 0.75 | -0.12 | 0.23 | 0.74 | -0.12 | 0.23 | 0.77 |
| Lactococcus                   | 0.41  | 0.01 | 0.09 | 0.28  | 0.06 | 0.44 | 0.27  | 0.10 | 0.75 | 0.27  | 0.11 | 0.74 | 0.23  | 0.16 | 0.73 |
| Marvinbryantia                | 0.07  | 0.44 | 0.62 | 0.02  | 0.83 | 0.88 | 0.02  | 0.84 | 0.91 | 0.02  | 0.85 | 0.90 | 0.05  | 0.59 | 0.87 |
| Megasphaera                   | -0.10 | 0.13 | 0.32 | -0.02 | 0.80 | 0.87 | 0.02  | 0.76 | 0.90 | 0.02  | 0.76 | 0.89 | 0.01  | 0.94 | 0.99 |
| Monoglobus                    | 0.24  | 0.02 | 0.11 | 0.16  | 0.10 | 0.53 | 0.05  | 0.62 | 0.89 | 0.05  | 0.61 | 0.89 | 0.07  | 0.53 | 0.87 |
| Moryella                      | 0.15  | 0.36 | 0.55 | 0.04  | 0.79 | 0.87 | -0.06 | 0.72 | 0.89 | -0.06 | 0.71 | 0.89 | -0.05 | 0.77 | 0.92 |
| Negativibacillus              | 0.03  | 0.75 | 0.85 | 0.07  | 0.41 | 0.71 | 0.09  | 0.36 | 0.76 | 0.09  | 0.35 | 0.74 | 0.10  | 0.28 | 0.77 |
| NK4A214_group                 | 0.13  | 0.09 | 0.28 | 0.07  | 0.31 | 0.67 | 0.02  | 0.78 | 0.90 | 0.03  | 0.74 | 0.89 | 0.05  | 0.54 | 0.87 |
| Odoribacter                   | 0.22  | 0.00 | 0.05 | 0.14  | 0.04 | 0.36 | 0.11  | 0.12 | 0.75 | 0.11  | 0.12 | 0.74 | 0.12  | 0.09 | 0.66 |
| Oscillibacter                 | 0.19  | 0.14 | 0.33 | 0.17  | 0.15 | 0.58 | 0.24  | 0.08 | 0.65 | 0.25  | 0.07 | 0.61 | 0.28  | 0.05 | 0.49 |
| Oscillospira                  | 0.13  | 0.44 | 0.62 | 0.09  | 0.53 | 0.77 | 0.10  | 0.52 | 0.89 | 0.10  | 0.52 | 0.89 | 0.17  | 0.29 | 0.77 |
| Oxalobacter                   | 0.18  | 0.17 | 0.38 | 0.04  | 0.76 | 0.86 | 0.01  | 0.96 | 0.98 | 0.01  | 0.95 | 0.98 | -0.03 | 0.84 | 0.95 |
| Paludicola                    | 0.34  | 0.01 | 0.09 | 0.24  | 0.06 | 0.43 | 0.19  | 0.17 | 0.75 | 0.20  | 0.15 | 0.74 | 0.21  | 0.14 | 0.71 |
| Parabacteroides               | 0.11  | 0.23 | 0.44 | 0.11  | 0.20 | 0.61 | 0.09  | 0.32 | 0.75 | 0.09  | 0.33 | 0.74 | 0.10  | 0.26 | 0.77 |
| Paraprevotella                | -0.08 | 0.26 | 0.46 | -0.06 | 0.32 | 0.67 | -0.08 | 0.26 | 0.75 | -0.08 | 0.27 | 0.74 | -0.06 | 0.37 | 0.81 |
| Parasutterella                | 0.21  | 0.00 | 0.05 | 0.19  | 0.00 | 0.19 | 0.16  | 0.03 | 0.51 | 0.16  | 0.03 | 0.49 | 0.15  | 0.04 | 0.49 |
| Phascolarctobacterium         | 0.18  | 0.01 | 0.06 | 0.17  | 0.00 | 0.19 | 0.17  | 0.01 | 0.51 | 0.18  | 0.01 | 0.49 | 0.16  | 0.01 | 0.49 |
| Phocaea                       | -0.20 | 0.23 | 0.44 | -0.26 | 0.07 | 0.45 | -0.28 | 0.07 | 0.65 | -0.28 | 0.07 | 0.61 | -0.26 | 0.11 | 0.66 |
| Prevotella                    | -0.06 | 0.27 | 0.46 | -0.05 | 0.39 | 0.70 | -0.04 | 0.51 | 0.89 | -0.04 | 0.52 | 0.89 | -0.03 | 0.58 | 0.87 |
| Romboutsia                    | -0.12 | 0.28 | 0.47 | -0.06 | 0.53 | 0.77 | -0.05 | 0.67 | 0.89 | -0.06 | 0.63 | 0.89 | -0.03 | 0.81 | 0.93 |
| Roseburia                     | 0.10  | 0.36 | 0.55 | 0.07  | 0.51 | 0.77 | -0.08 | 0.50 | 0.89 | -0.08 | 0.49 | 0.89 | -0.04 | 0.73 | 0.92 |
| Rothia                        | -0.42 | 0.05 | 0.21 | -0.42 | 0.03 | 0.36 | -0.55 | 0.01 | 0.51 | -0.56 | 0.01 | 0.49 | -0.49 | 0.03 | 0.49 |
| Ruminococcus                  | 0.18  | 0.02 | 0.10 | 0.10  | 0.16 | 0.58 | 0.06  | 0.44 | 0.86 | 0.06  | 0.43 | 0.84 | 0.08  | 0.33 | 0.77 |
| Sellimonas                    | 0.04  | 0.70 | 0.84 | 0.01  | 0.90 | 0.92 | 0.00  | 0.98 | 0.98 | 0.00  | 0.99 | 0.99 | 0.01  | 0.91 | 0.98 |
| Senegalimassilia              | -0.06 | 0.54 | 0.71 | -0.03 | 0.77 | 0.86 | -0.04 | 0.69 | 0.89 | -0.04 | 0.70 | 0.89 | -0.02 | 0.81 | 0.93 |
| Slackia                       | -0.02 | 0.79 | 0.86 | -0.03 | 0.70 | 0.86 | -0.02 | 0.78 | 0.90 | -0.02 | 0.78 | 0.89 | -0.03 | 0.74 | 0.92 |
| Streptococcus                 | 0.16  | 0.23 | 0.44 | 0.14  | 0.24 | 0.63 | 0.14  | 0.30 | 0.75 | 0.14  | 0.31 | 0.74 | 0.15  | 0.28 | 0.77 |
| Subdoligranulum               | 0.29  | 0.01 | 0.06 | 0.23  | 0.02 | 0.33 | 0.22  | 0.03 | 0.51 | 0.22  | 0.03 | 0.49 | 0.26  | 0.01 | 0.49 |
| Sutterella                    | -0.18 | 0.00 | 0.05 | -0.13 | 0.03 | 0.36 | -0.12 | 0.05 | 0.60 | -0.12 | 0.05 | 0.60 | -0.12 | 0.06 | 0.55 |
| TM7x                          | -0.14 | 0.32 | 0.51 | -0.16 | 0.21 | 0.61 | -0.08 | 0.56 | 0.89 | -0.08 | 0.56 | 0.89 | -0.07 | 0.63 | 0.87 |
| Turicibacter                  | 0.00  | 0.98 | 0.99 | 0.10  | 0.47 | 0.75 | 0.18  | 0.29 | 0.75 | 0.17  | 0.30 | 0.74 | 0.17  | 0.31 | 0.77 |
| Tuzzerella                    | 0.13  | 0.25 | 0.45 | 0.12  | 0.23 | 0.63 | 0.10  | 0.37 | 0.77 | 0.10  | 0.37 | 0.75 | 0.10  | 0.40 | 0.84 |
| UBA1819                       | 0.16  | 0.28 | 0.47 | 0.10  | 0.45 | 0.74 | 0.16  | 0.27 | 0.75 | 0.17  | 0.25 | 0.74 | 0.19  | 0.20 | 0.73 |
| UCG.002                       | 0.18  | 0.01 | 0.09 | 0.10  | 0.12 | 0.58 | 0.07  | 0.33 | 0.75 | 0.07  | 0.31 | 0.74 | 0.10  | 0.17 | 0.73 |
| UCG.003                       | 0.12  | 0.14 | 0.33 | 0.08  | 0.28 | 0.67 | 0.05  | 0.57 | 0.89 | 0.05  | 0.56 | 0.89 | 0.05  | 0.53 | 0.87 |
| UCG.005                       | 0.28  | 0.00 | 0.05 | 0.17  | 0.03 | 0.36 | 0.12  | 0.18 | 0.75 | 0.13  | 0.16 | 0.74 | 0.16  | 0.09 | 0.66 |
| UCG.009                       | 0.08  | 0.61 | 0.76 | -0.07 | 0.63 | 0.84 | -0.17 | 0.23 | 0.75 | -0.18 | 0.23 | 0.74 | -0.15 | 0.31 | 0.77 |
| Veillonella                   | 0.00  | 1.00 | 1.00 | 0.03  | 0.75 | 0.86 | -0.02 | 0.85 | 0.91 | -0.02 | 0.83 | 0.90 | 0.00  | 0.97 | 1.00 |
| Victivallis                   | -0.03 | 0.80 | 0.86 | -0.08 | 0.41 | 0.71 | -0.16 | 0.14 | 0.75 | -0.16 | 0.14 | 0.74 | -0.17 | 0.12 | 0.66 |

Multivariable-adjusted regression models adjusted for:

Model 1: sequencing batch, age, race, gender, study center

Model 2: Model 1, with education

Model 3: Model 2, with physical activity, diet score, medication use, and smoking

Model 4: Model 3 with BMI

Model 5: Model 4 with hypertension and diabetes

eTable 33: Multivariable-adjusted regression coefficients, p-values, and false discovery rate (FDR)-adjusted p-values for genera among White participants with respect to DSST.

|                               | Model1 |         |      | Model2 |         |      | Model3 |         |      | Model4 |         |      | Model5 |         |      |
|-------------------------------|--------|---------|------|--------|---------|------|--------|---------|------|--------|---------|------|--------|---------|------|
|                               | beta   | p-value | FDR  | beta   | p-value | FDR  | beta   | p-value | FDR  | beta   | p-value | FDR  | beta   | p-value | FDR  |
| Acetanaerobacterium           | -0.41  | 0.82    | 0.94 | 0.61   | 0.73    | 0.91 | 0.77   | 0.67    | 0.97 | 0.58   | 0.75    | 1.00 | 0.23   | 0.90    | 0.98 |
| Acidaminococcus               | -1.24  | 0.05    | 0.34 | -0.75  | 0.23    | 0.77 | -0.64  | 0.33    | 0.97 | -0.61  | 0.36    | 0.94 | -0.60  | 0.37    | 0.95 |
| Actinomyces                   | 2.00   | 0.26    | 0.61 | 2.04   | 0.23    | 0.77 | 2.86   | 0.11    | 0.83 | 2.82   | 0.11    | 0.80 | 3.02   | 0.09    | 0.78 |
| Adlercreutzia                 | 0.72   | 0.44    | 0.74 | 0.85   | 0.35    | 0.86 | 0.45   | 0.64    | 0.97 | 0.41   | 0.67    | 0.99 | 0.39   | 0.69    | 0.98 |
| Agathobacter                  | 0.19   | 0.87    | 0.95 | 0.16   | 0.89    | 0.96 | -0.53  | 0.66    | 0.97 | -0.27  | 0.82    | 1.00 | -0.17  | 0.89    | 0.98 |
| Akkermansia                   | 1.14   | 0.06    | 0.34 | 0.99   | 0.09    | 0.53 | 0.96   | 0.12    | 0.83 | 0.94   | 0.12    | 0.80 | 0.94   | 0.13    | 0.78 |
| Alistipes                     | 0.56   | 0.57    | 0.77 | 0.43   | 0.65    | 0.91 | 0.05   | 0.96    | 0.99 | 0.00   | 1.00    | 1.00 | -0.08  | 0.93    | 0.98 |
| Anaerofilum                   | 1.01   | 0.44    | 0.74 | 0.23   | 0.86    | 0.96 | 0.06   | 0.96    | 0.99 | -0.04  | 0.98    | 1.00 | -0.01  | 1.00    | 1.00 |
| Anaerostipes                  | -0.06  | 0.97    | 0.99 | -0.34  | 0.83    | 0.96 | -1.02  | 0.54    | 0.97 | -1.33  | 0.43    | 0.94 | -1.24  | 0.46    | 0.97 |
| Anaerotruncus                 | -0.63  | 0.62    | 0.79 | -0.87  | 0.48    | 0.88 | -0.82  | 0.53    | 0.97 | -1.21  | 0.36    | 0.94 | -1.25  | 0.35    | 0.95 |
| Angelakisella                 | -2.18  | 0.24    | 0.61 | -2.99  | 0.09    | 0.53 | -3.03  | 0.11    | 0.83 | -2.97  | 0.12    | 0.80 | -3.21  | 0.09    | 0.78 |
| Bacteroides                   | -4.35  | 0.13    | 0.51 | -4.49  | 0.10    | 0.53 | -3.77  | 0.20    | 0.93 | -3.74  | 0.20    | 0.90 | -3.86  | 0.19    | 0.89 |
| Barnesiella                   | 1.20   | 0.03    | 0.23 | 1.14   | 0.03    | 0.35 | 0.90   | 0.11    | 0.83 | 0.90   | 0.11    | 0.80 | 0.91   | 0.11    | 0.78 |
| Bifidobacterium               | -0.40  | 0.58    | 0.77 | 0.15   | 0.84    | 0.96 | 0.09   | 0.90    | 0.99 | 0.05   | 0.95    | 1.00 | 0.04   | 0.95    | 0.98 |
| Bilophila                     | -0.04  | 0.96    | 0.99 | 0.01   | 0.99    | 0.99 | -0.01  | 0.99    | 0.99 | -0.09  | 0.91    | 1.00 | -0.12  | 0.88    | 0.98 |
| Blautia                       | 3.27   | 0.25    | 0.61 | 2.29   | 0.41    | 0.88 | 2.23   | 0.44    | 0.97 | 1.62   | 0.57    | 0.94 | 1.88   | 0.51    | 0.97 |
| Butyricoccus                  | 1.03   | 0.60    | 0.78 | 0.20   | 0.91    | 0.96 | -0.30  | 0.88    | 0.99 | -0.32  | 0.87    | 1.00 | -0.13  | 0.95    | 0.98 |
| Butyricimonas                 | 0.62   | 0.34    | 0.66 | 0.42   | 0.50    | 0.88 | 0.35   | 0.60    | 0.97 | 0.39   | 0.55    | 0.94 | 0.38   | 0.57    | 0.97 |
| CAG.56                        | 2.27   | 0.00    | 0.08 | 1.87   | 0.01    | 0.25 | 1.57   | 0.05    | 0.78 | 1.52   | 0.06    | 0.80 | 1.55   | 0.05    | 0.78 |
| Candidatus_Soleaferrea        | -1.87  | 0.23    | 0.61 | -2.39  | 0.11    | 0.53 | -1.94  | 0.21    | 0.93 | -2.01  | 0.20    | 0.90 | -2.23  | 0.16    | 0.84 |
| Caproiciproducens             | -0.13  | 0.92    | 0.97 | 0.13   | 0.92    | 0.96 | -0.48  | 0.72    | 0.97 | -0.57  | 0.67    | 0.99 | -0.60  | 0.65    | 0.97 |
| Christensenellaceae_R.7_group | 1.41   | 0.03    | 0.23 | 1.24   | 0.05    | 0.38 | 0.89   | 0.19    | 0.93 | 0.79   | 0.24    | 0.94 | 0.81   | 0.23    | 0.95 |
| Clostridium_sensu_stricto_1   | -0.08  | 0.92    | 0.97 | -0.03  | 0.97    | 0.99 | -0.10  | 0.89    | 0.99 | -0.24  | 0.76    | 1.00 | -0.37  | 0.64    | 0.97 |
| Collidextribacter             | -2.90  | 0.10    | 0.46 | -3.81  | 0.03    | 0.35 | -3.61  | 0.06    | 0.78 | -3.82  | 0.04    | 0.80 | -3.78  | 0.05    | 0.78 |
| Collinsella                   | -0.25  | 0.74    | 0.88 | 0.19   | 0.79    | 0.93 | 0.20   | 0.79    | 0.97 | 0.32   | 0.67    | 0.99 | 0.30   | 0.70    | 0.98 |
| Coprobacter                   | -0.19  | 0.80    | 0.93 | -0.50  | 0.48    | 0.88 | -0.78  | 0.31    | 0.97 | -0.81  | 0.28    | 0.94 | -0.80  | 0.29    | 0.95 |
| Coproccoccus                  | 2.01   | 0.02    | 0.21 | 1.72   | 0.04    | 0.36 | 1.49   | 0.09    | 0.83 | 1.43   | 0.10    | 0.80 | 1.40   | 0.11    | 0.78 |
| Defluviitaleaceae_UCG.011     | 1.85   | 0.12    | 0.51 | 1.58   | 0.17    | 0.66 | 1.02   | 0.40    | 0.97 | 0.84   | 0.49    | 0.94 | 0.78   | 0.52    | 0.97 |
| Desulfovibrio                 | 0.44   | 0.56    | 0.77 | 0.47   | 0.51    | 0.88 | 0.40   | 0.60    | 0.97 | 0.31   | 0.68    | 1.00 | 0.35   | 0.65    | 0.97 |
| Dialister                     | 0.31   | 0.57    | 0.77 | 0.27   | 0.62    | 0.91 | 0.21   | 0.71    | 0.97 | 0.30   | 0.61    | 0.96 | 0.26   | 0.66    | 0.97 |
| DNF00809                      | 2.36   | 0.08    | 0.42 | 1.98   | 0.13    | 0.62 | 1.39   | 0.32    | 0.97 | 1.28   | 0.36    | 0.94 | 1.27   | 0.36    | 0.95 |
| Dorea                         | -0.15  | 0.90    | 0.97 | 0.15   | 0.90    | 0.96 | -0.30  | 0.81    | 0.97 | -0.30  | 0.81    | 1.00 | -0.25  | 0.84    | 0.98 |
| DTU089                        | -1.31  | 0.25    | 0.61 | -1.20  | 0.27    | 0.82 | -1.61  | 0.16    | 0.93 | -1.87  | 0.11    | 0.80 | -1.82  | 0.12    | 0.78 |
| Eggerthella                   | -0.55  | 0.62    | 0.79 | -0.49  | 0.65    | 0.91 | -0.22  | 0.84    | 0.97 | -0.40  | 0.72    | 1.00 | -0.29  | 0.80    | 0.98 |
| Eisenbergiella                | -0.53  | 0.66    | 0.81 | -0.44  | 0.70    | 0.91 | -0.64  | 0.59    | 0.97 | -1.01  | 0.40    | 0.94 | -0.83  | 0.49    | 0.97 |
| Erysipelatoclostridium        | -1.36  | 0.25    | 0.61 | -1.05  | 0.36    | 0.86 | -0.32  | 0.79    | 0.97 | -0.60  | 0.62    | 0.97 | -0.62  | 0.61    | 0.97 |
| Erysipelotrichaceae_UCG.003   | 0.53   | 0.54    | 0.77 | 0.36   | 0.67    | 0.91 | -0.20  | 0.83    | 0.97 | -0.24  | 0.79    | 1.00 | -0.26  | 0.78    | 0.98 |
| Escherichia.Shigella          | -0.26  | 0.74    | 0.88 | -0.18  | 0.81    | 0.95 | 0.05   | 0.95    | 0.99 | 0.09   | 0.91    | 1.00 | 0.10   | 0.90    | 0.98 |
| Faecalibacterium              | 1.50   | 0.14    | 0.51 | 1.42   | 0.14    | 0.64 | 0.94   | 0.38    | 0.97 | 0.97   | 0.36    | 0.94 | 0.96   | 0.37    | 0.95 |
| Family_XIII_AD3011_group      | 1.83   | 0.08    | 0.42 | 1.39   | 0.17    | 0.66 | 0.97   | 0.38    | 0.97 | 0.77   | 0.48    | 0.94 | 0.78   | 0.48    | 0.97 |
| Family_XIII_UCG.001           | 0.98   | 0.44    | 0.74 | 0.52   | 0.67    | 0.91 | 0.26   | 0.84    | 0.97 | -0.03  | 0.98    | 1.00 | -0.08  | 0.95    | 0.98 |
| FD2005                        | 1.16   | 0.38    | 0.71 | 0.80   | 0.53    | 0.89 | 0.73   | 0.59    | 0.97 | 0.99   | 0.46    | 0.94 | 0.88   | 0.52    | 0.97 |
| Flavonifractor                | -2.20  | 0.05    | 0.34 | -1.94  | 0.07    | 0.52 | -1.53  | 0.18    | 0.93 | -1.50  | 0.19    | 0.90 | -1.49  | 0.19    | 0.89 |
| Fournierella                  | 0.59   | 0.61    | 0.79 | 0.65   | 0.56    | 0.89 | 0.27   | 0.82    | 0.97 | 0.16   | 0.89    | 1.00 | 0.19   | 0.87    | 0.98 |
| Frisingicoccus                | -1.66  | 0.06    | 0.34 | -1.76  | 0.04    | 0.36 | -1.92  | 0.03    | 0.78 | -1.99  | 0.02    | 0.80 | -1.89  | 0.03    | 0.78 |
| Fusicatenibacter              | 0.00   | 1.00    | 1.00 | -0.33  | 0.70    | 0.91 | -0.64  | 0.48    | 0.97 | -0.52  | 0.57    | 0.94 | -0.50  | 0.59    | 0.97 |
| Fusobacterium                 | 1.09   | 0.47    | 0.74 | 1.16   | 0.42    | 0.88 | 2.00   | 0.18    | 0.93 | 1.83   | 0.22    | 0.94 | 1.70   | 0.26    | 0.95 |
| GCA.900066575                 | 0.69   | 0.55    | 0.77 | 0.15   | 0.89    | 0.96 | -0.39  | 0.74    | 0.97 | -0.61  | 0.60    | 0.96 | -0.87  | 0.46    | 0.97 |
| GCA.900066755                 | 1.22   | 0.52    | 0.77 | 0.84   | 0.64    | 0.91 | 1.33   | 0.50    | 0.97 | 1.09   | 0.58    | 0.94 | 1.02   | 0.61    | 0.97 |
| Gordonibacter                 | -1.13  | 0.32    | 0.65 | -1.07  | 0.33    | 0.86 | -1.45  | 0.21    | 0.93 | -1.75  | 0.13    | 0.80 | -1.72  | 0.14    | 0.81 |
| Granulicatella                | 1.45   | 0.42    | 0.74 | 1.03   | 0.55    | 0.89 | 1.54   | 0.39    | 0.97 | 1.39   | 0.44    | 0.94 | 1.55   | 0.39    | 0.95 |
| Haemophilus                   | 1.26   | 0.16    | 0.53 | 0.96   | 0.26    | 0.82 | 0.96   | 0.29    | 0.97 | 0.82   | 0.36    | 0.94 | 0.85   | 0.35    | 0.95 |
| Harryflintia                  | -0.27  | 0.85    | 0.94 | -0.48  | 0.72    | 0.91 | -0.15  | 0.91    | 0.99 | -0.23  | 0.87    | 1.00 | -0.49  | 0.73    | 0.98 |
| Holdemanella                  | 1.05   | 0.27    | 0.61 | 1.06   | 0.25    | 0.81 | 0.72   | 0.46    | 0.97 | 0.89   | 0.36    | 0.94 | 0.94   | 0.33    | 0.95 |

|                               |       |      |      |       |      |      |       |      |      |       |      |      |       |      |      |
|-------------------------------|-------|------|------|-------|------|------|-------|------|------|-------|------|------|-------|------|------|
| Holdemania                    | 0.39  | 0.84 | 0.94 | 0.25  | 0.90 | 0.96 | 0.96  | 0.63 | 0.97 | 0.68  | 0.74 | 1.00 | 0.33  | 0.87 | 0.98 |
| Hungatella                    | -0.66 | 0.54 | 0.77 | -0.31 | 0.77 | 0.93 | 0.25  | 0.82 | 0.97 | 0.12  | 0.91 | 1.00 | 0.29  | 0.80 | 0.98 |
| Hydrogenoanaerobacterium      | 1.59  | 0.15 | 0.53 | 1.12  | 0.30 | 0.84 | 0.34  | 0.77 | 0.97 | 0.11  | 0.92 | 1.00 | 0.13  | 0.92 | 0.98 |
| Incertae_Sedis                | 0.87  | 0.65 | 0.81 | 1.44  | 0.44 | 0.88 | 1.37  | 0.49 | 0.97 | 1.15  | 0.56 | 0.94 | 1.19  | 0.55 | 0.97 |
| Intestinibacter               | 0.65  | 0.51 | 0.77 | 1.24  | 0.20 | 0.71 | 1.23  | 0.23 | 0.94 | 1.30  | 0.20 | 0.90 | 1.35  | 0.19 | 0.89 |
| Intestinimonas                | 0.56  | 0.56 | 0.77 | 0.13  | 0.89 | 0.96 | 0.02  | 0.99 | 0.99 | -0.19 | 0.85 | 1.00 | -0.07 | 0.95 | 0.98 |
| Lachnoclostridium             | -4.41 | 0.03 | 0.26 | -3.54 | 0.08 | 0.53 | -1.60 | 0.47 | 0.97 | -1.37 | 0.53 | 0.94 | -1.29 | 0.56 | 0.97 |
| Lachnospira                   | 4.90  | 0.00 | 0.00 | 4.00  | 0.00 | 0.03 | 3.91  | 0.00 | 0.07 | 3.83  | 0.00 | 0.08 | 3.83  | 0.00 | 0.08 |
| Lachnospiraceae_FCS020_group  | 3.36  | 0.00 | 0.06 | 2.69  | 0.01 | 0.25 | 2.13  | 0.05 | 0.78 | 2.06  | 0.06 | 0.80 | 2.07  | 0.06 | 0.78 |
| Lachnospiraceae_ND3007_group  | 0.16  | 0.82 | 0.94 | -0.40 | 0.56 | 0.89 | -0.80 | 0.27 | 0.97 | -0.79 | 0.28 | 0.94 | -0.82 | 0.27 | 0.95 |
| Lachnospiraceae_NK4A136_group | 1.07  | 0.33 | 0.65 | 0.54  | 0.61 | 0.91 | -0.28 | 0.80 | 0.97 | -0.32 | 0.78 | 1.00 | -0.30 | 0.79 | 0.98 |
| Lachnospiraceae_UCG.001       | 1.76  | 0.02 | 0.21 | 1.62  | 0.03 | 0.35 | 1.45  | 0.06 | 0.78 | 1.45  | 0.06 | 0.80 | 1.45  | 0.06 | 0.78 |
| Lachnospiraceae_UCG.004       | 1.60  | 0.06 | 0.34 | 1.32  | 0.11 | 0.53 | 1.09  | 0.20 | 0.93 | 1.15  | 0.18 | 0.90 | 1.01  | 0.25 | 0.95 |
| Lachnospiraceae_UCG.010       | 1.40  | 0.26 | 0.61 | 0.85  | 0.48 | 0.88 | 0.81  | 0.52 | 0.97 | 0.76  | 0.55 | 0.94 | 0.78  | 0.54 | 0.97 |
| Lactobacillus                 | -3.23 | 0.01 | 0.17 | -2.36 | 0.05 | 0.42 | -2.25 | 0.08 | 0.82 | -2.13 | 0.09 | 0.80 | -1.96 | 0.13 | 0.78 |
| Lactococcus                   | -1.26 | 0.31 | 0.64 | -1.17 | 0.33 | 0.86 | -1.19 | 0.35 | 0.97 | -1.43 | 0.26 | 0.94 | -1.48 | 0.25 | 0.95 |
| Marvinbryantia                | 1.00  | 0.21 | 0.61 | 0.69  | 0.37 | 0.86 | 0.36  | 0.66 | 0.97 | 0.24  | 0.77 | 1.00 | 0.27  | 0.74 | 0.98 |
| Megasphaera                   | -0.04 | 0.97 | 0.99 | 0.33  | 0.70 | 0.91 | 0.60  | 0.52 | 0.97 | 0.74  | 0.43 | 0.94 | 0.71  | 0.45 | 0.97 |
| Monoglobus                    | 1.68  | 0.15 | 0.53 | 1.61  | 0.15 | 0.65 | 1.24  | 0.30 | 0.97 | 1.06  | 0.37 | 0.94 | 1.16  | 0.33 | 0.95 |
| Moryella                      | 3.46  | 0.01 | 0.17 | 2.91  | 0.02 | 0.35 | 2.06  | 0.13 | 0.89 | 2.09  | 0.13 | 0.80 | 2.09  | 0.13 | 0.78 |
| Negativibacillus              | -2.07 | 0.02 | 0.21 | -2.13 | 0.01 | 0.25 | -2.14 | 0.02 | 0.78 | -2.03 | 0.02 | 0.80 | -2.08 | 0.02 | 0.78 |
| NK4A214_group                 | 1.15  | 0.09 | 0.42 | 0.87  | 0.18 | 0.66 | 0.47  | 0.50 | 0.97 | 0.46  | 0.51 | 0.94 | 0.49  | 0.49 | 0.97 |
| Odoribacter                   | -0.20 | 0.76 | 0.90 | -0.09 | 0.89 | 0.96 | -0.50 | 0.47 | 0.97 | -0.56 | 0.42 | 0.94 | -0.62 | 0.38 | 0.95 |
| Oscillibacter                 | 1.21  | 0.29 | 0.62 | 0.74  | 0.50 | 0.88 | 0.35  | 0.76 | 0.97 | 0.25  | 0.83 | 1.00 | 0.19  | 0.87 | 0.98 |
| Oscillospira                  | -2.22 | 0.20 | 0.61 | -1.75 | 0.30 | 0.84 | -1.06 | 0.55 | 0.97 | -1.19 | 0.50 | 0.94 | -1.19 | 0.50 | 0.97 |
| Oxalobacter                   | 2.63  | 0.02 | 0.21 | 1.77  | 0.10 | 0.53 | 1.58  | 0.17 | 0.93 | 1.63  | 0.15 | 0.88 | 1.76  | 0.13 | 0.78 |
| Paludicola                    | 1.30  | 0.25 | 0.61 | 0.38  | 0.73 | 0.91 | -0.34 | 0.77 | 0.97 | -0.71 | 0.55 | 0.94 | -0.50 | 0.68 | 0.98 |
| Parabacteroides               | -0.62 | 0.44 | 0.74 | -0.05 | 0.94 | 0.97 | 0.29  | 0.72 | 0.97 | 0.24  | 0.77 | 1.00 | 0.24  | 0.78 | 0.98 |
| Paraprevotella                | -0.57 | 0.35 | 0.66 | -0.32 | 0.58 | 0.91 | -0.26 | 0.68 | 0.97 | -0.29 | 0.64 | 0.99 | -0.29 | 0.65 | 0.97 |
| Parasutterella                | 0.35  | 0.57 | 0.77 | 0.31  | 0.61 | 0.91 | -0.05 | 0.93 | 0.99 | -0.02 | 0.97 | 1.00 | -0.10 | 0.88 | 0.98 |
| Peptococcus                   | 0.86  | 0.46 | 0.74 | 0.45  | 0.69 | 0.91 | 0.27  | 0.82 | 0.97 | 0.15  | 0.90 | 1.00 | 0.30  | 0.80 | 0.98 |
| Phascolarctobacterium         | -0.65 | 0.27 | 0.61 | -0.53 | 0.35 | 0.86 | -0.52 | 0.38 | 0.97 | -0.65 | 0.28 | 0.94 | -0.64 | 0.29 | 0.95 |
| Phoceae                       | -0.59 | 0.70 | 0.85 | -0.59 | 0.68 | 0.91 | -0.37 | 0.81 | 0.97 | -0.19 | 0.90 | 1.00 | -0.33 | 0.83 | 0.98 |
| Prevotella                    | -0.87 | 0.13 | 0.51 | -0.50 | 0.37 | 0.86 | -0.48 | 0.42 | 0.97 | -0.37 | 0.53 | 0.94 | -0.36 | 0.55 | 0.97 |
| Romboutsia                    | 0.09  | 0.93 | 0.97 | 0.24  | 0.78 | 0.93 | -0.21 | 0.82 | 0.97 | -0.34 | 0.71 | 1.00 | -0.44 | 0.65 | 0.97 |
| Roseburia                     | 1.15  | 0.34 | 0.66 | 0.87  | 0.45 | 0.88 | 0.72  | 0.55 | 0.97 | 0.81  | 0.50 | 0.94 | 0.80  | 0.51 | 0.97 |
| Ruminococcus                  | 0.81  | 0.28 | 0.62 | 0.48  | 0.51 | 0.88 | 0.03  | 0.97 | 0.99 | 0.00  | 1.00 | 1.00 | 0.04  | 0.96 | 0.98 |
| Sellimonas                    | 1.71  | 0.10 | 0.45 | 1.38  | 0.16 | 0.66 | 0.97  | 0.36 | 0.97 | 0.94  | 0.37 | 0.94 | 0.97  | 0.36 | 0.95 |
| Shuttleworthia                | 0.18  | 0.85 | 0.94 | -0.57 | 0.55 | 0.89 | -1.11 | 0.28 | 0.97 | -1.14 | 0.26 | 0.94 | -1.04 | 0.31 | 0.95 |
| Slackia                       | -0.97 | 0.29 | 0.62 | -0.61 | 0.49 | 0.88 | -0.83 | 0.37 | 0.97 | -0.81 | 0.39 | 0.94 | -0.91 | 0.33 | 0.95 |
| Streptococcus                 | -0.44 | 0.73 | 0.88 | -0.41 | 0.74 | 0.91 | -0.49 | 0.72 | 0.97 | -0.94 | 0.49 | 0.94 | -0.83 | 0.54 | 0.97 |
| Subdoligranulum               | 0.66  | 0.47 | 0.74 | 0.30  | 0.74 | 0.91 | -0.27 | 0.77 | 0.97 | -0.29 | 0.75 | 1.00 | -0.35 | 0.70 | 0.98 |
| Sutterella                    | -0.66 | 0.22 | 0.61 | -0.37 | 0.49 | 0.88 | -0.38 | 0.49 | 0.97 | -0.41 | 0.45 | 0.94 | -0.44 | 0.43 | 0.97 |
| TM7x                          | 0.86  | 0.50 | 0.77 | 0.12  | 0.92 | 0.96 | 0.02  | 0.99 | 0.99 | -0.16 | 0.90 | 1.00 | -0.05 | 0.97 | 0.98 |
| Turicibacter                  | 0.75  | 0.54 | 0.77 | 1.10  | 0.35 | 0.86 | 0.92  | 0.45 | 0.97 | 0.79  | 0.51 | 0.94 | 0.58  | 0.63 | 0.97 |
| Tuzzerella                    | -2.53 | 0.00 | 0.08 | -2.22 | 0.01 | 0.25 | -1.89 | 0.03 | 0.78 | -1.88 | 0.03 | 0.80 | -1.98 | 0.02 | 0.78 |
| Tyzzerella                    | 0.03  | 0.98 | 0.99 | 0.02  | 0.99 | 0.99 | -0.08 | 0.95 | 0.99 | 0.11  | 0.93 | 1.00 | 0.41  | 0.74 | 0.98 |
| UBA1819                       | -1.10 | 0.46 | 0.74 | -1.07 | 0.45 | 0.88 | -0.92 | 0.54 | 0.97 | -1.23 | 0.41 | 0.94 | -1.28 | 0.39 | 0.95 |
| UCG.002                       | 0.51  | 0.44 | 0.74 | 0.23  | 0.72 | 0.91 | -0.46 | 0.51 | 0.97 | -0.55 | 0.44 | 0.94 | -0.62 | 0.39 | 0.95 |
| UCG.003                       | 1.09  | 0.14 | 0.51 | 0.52  | 0.47 | 0.88 | 0.01  | 0.99 | 0.99 | 0.00  | 1.00 | 1.00 | -0.03 | 0.97 | 0.98 |
| UCG.005                       | 1.06  | 0.22 | 0.61 | 0.92  | 0.26 | 0.82 | 0.18  | 0.84 | 0.97 | 0.03  | 0.97 | 1.00 | 0.06  | 0.95 | 0.98 |
| UCG.009                       | 1.69  | 0.17 | 0.57 | 0.97  | 0.42 | 0.88 | 0.52  | 0.68 | 0.97 | 0.28  | 0.83 | 1.00 | 0.27  | 0.83 | 0.98 |
| Veillonella                   | 1.15  | 0.23 | 0.61 | 0.94  | 0.30 | 0.84 | 1.01  | 0.29 | 0.97 | 0.94  | 0.32 | 0.94 | 0.97  | 0.31 | 0.95 |
| Victivallis                   | 2.26  | 0.01 | 0.17 | 1.83  | 0.03 | 0.36 | 1.69  | 0.07 | 0.78 | 1.56  | 0.09 | 0.80 | 1.67  | 0.07 | 0.78 |

Multivariable-adjusted regression models adjusted for:

Model 1: sequencing batch, age, race, gender, study center

Model 2: Model 1, with education

Model 3: Model 2, with physical activity, diet score, medication use, and smoking

Model 4: Model 3 with BMI

Model 5: Model 4 with hypertension and diabetes



eTable 34: Multivariable-adjusted regression coefficients, p-values, and false discovery rate (FDR)-adjusted p-values for genera among White participants with respect to Stoop.

|                               | Model1 |         |      | Model2 |         |      | Model3 |         |      | Model4 |         |      | Model5 |         |      |
|-------------------------------|--------|---------|------|--------|---------|------|--------|---------|------|--------|---------|------|--------|---------|------|
|                               | beta   | p-value | FDR  | beta   | p-value | FDR  | beta   | p-value | FDR  | beta   | p-value | FDR  | beta   | p-value | FDR  |
| Acetanaerobacterium           | 0.26   | 0.83    | 0.97 | 0.09   | 0.94    | 0.99 | 0.35   | 0.78    | 0.95 | 0.39   | 0.76    | 0.95 | 0.19   | 0.88    | 0.97 |
| Acidaminococcus               | 0.58   | 0.17    | 0.67 | 0.50   | 0.24    | 0.75 | 0.66   | 0.14    | 0.64 | 0.66   | 0.15    | 0.66 | 0.64   | 0.16    | 0.74 |
| Actinomyces                   | -0.60  | 0.60    | 0.94 | -0.60  | 0.61    | 0.93 | -1.20  | 0.33    | 0.85 | -1.19  | 0.33    | 0.87 | -0.99  | 0.42    | 0.88 |
| Adlercreutzia                 | 0.22   | 0.73    | 0.96 | 0.19   | 0.76    | 0.97 | 0.45   | 0.50    | 0.88 | 0.45   | 0.50    | 0.89 | 0.37   | 0.58    | 0.88 |
| Agathobacter                  | -0.05  | 0.94    | 0.99 | -0.04  | 0.95    | 0.99 | 0.37   | 0.65    | 0.92 | 0.33   | 0.69    | 0.94 | 0.47   | 0.57    | 0.88 |
| Akkermansia                   | 0.01   | 0.97    | 0.99 | 0.04   | 0.93    | 0.99 | 0.06   | 0.88    | 0.97 | 0.07   | 0.88    | 0.97 | 0.04   | 0.93    | 0.97 |
| Alistipes                     | -0.45  | 0.48    | 0.85 | -0.43  | 0.50    | 0.89 | -0.12  | 0.86    | 0.97 | -0.11  | 0.87    | 0.97 | -0.30  | 0.67    | 0.91 |
| Anaerofilum                   | 1.02   | 0.24    | 0.70 | 1.17   | 0.18    | 0.72 | 1.36   | 0.13    | 0.64 | 1.38   | 0.13    | 0.66 | 1.47   | 0.11    | 0.73 |
| Anaerostipes                  | -0.24  | 0.83    | 0.97 | -0.17  | 0.88    | 0.98 | -0.41  | 0.72    | 0.95 | -0.36  | 0.76    | 0.95 | -0.30  | 0.80    | 0.97 |
| Anaerotruncus                 | 1.17   | 0.17    | 0.67 | 1.21   | 0.15    | 0.70 | 1.53   | 0.09    | 0.64 | 1.63   | 0.07    | 0.66 | 1.46   | 0.11    | 0.73 |
| Angelakisella                 | 0.58   | 0.63    | 0.94 | 0.73   | 0.55    | 0.91 | 1.04   | 0.42    | 0.88 | 1.03   | 0.43    | 0.89 | 1.17   | 0.37    | 0.88 |
| Bacteroides                   | 2.43   | 0.20    | 0.67 | 2.45   | 0.19    | 0.72 | 2.47   | 0.22    | 0.80 | 2.46   | 0.22    | 0.80 | 2.45   | 0.22    | 0.74 |
| Barnesiella                   | -0.91  | 0.01    | 0.33 | -0.90  | 0.01    | 0.37 | -0.93  | 0.01    | 0.53 | -0.93  | 0.01    | 0.54 | -0.89  | 0.02    | 0.52 |
| Bifidobacterium               | -0.60  | 0.21    | 0.67 | -0.71  | 0.14    | 0.70 | -0.71  | 0.15    | 0.64 | -0.71  | 0.16    | 0.66 | -0.67  | 0.18    | 0.74 |
| Bilophila                     | -0.56  | 0.28    | 0.77 | -0.57  | 0.26    | 0.77 | -0.38  | 0.48    | 0.88 | -0.37  | 0.49    | 0.89 | -0.35  | 0.52    | 0.88 |
| Blautia                       | 2.28   | 0.22    | 0.67 | 2.48   | 0.19    | 0.72 | 2.24   | 0.25    | 0.83 | 2.39   | 0.22    | 0.80 | 2.32   | 0.24    | 0.74 |
| Butyricoccus                  | 2.19   | 0.09    | 0.67 | 2.38   | 0.06    | 0.70 | 3.10   | 0.02    | 0.62 | 3.10   | 0.02    | 0.57 | 3.10   | 0.02    | 0.52 |
| Butyricimonas                 | -0.31  | 0.47    | 0.84 | -0.28  | 0.51    | 0.89 | -0.13  | 0.77    | 0.95 | -0.14  | 0.76    | 0.95 | -0.20  | 0.67    | 0.91 |
| CAG.56                        | -0.92  | 0.07    | 0.67 | -0.86  | 0.09    | 0.70 | -0.66  | 0.23    | 0.80 | -0.65  | 0.23    | 0.80 | -0.69  | 0.21    | 0.74 |
| Candidatus_Soleaferrea        | 1.46   | 0.15    | 0.67 | 1.54   | 0.13    | 0.70 | 1.53   | 0.15    | 0.64 | 1.55   | 0.15    | 0.66 | 1.42   | 0.19    | 0.74 |
| Caproiciproducens             | -0.79  | 0.35    | 0.82 | -0.83  | 0.32    | 0.83 | -0.70  | 0.43    | 0.88 | -0.69  | 0.44    | 0.89 | -0.77  | 0.39    | 0.88 |
| Christensenellaceae_R.7_group | -0.95  | 0.02    | 0.38 | -0.92  | 0.03    | 0.45 | -0.78  | 0.09    | 0.64 | -0.77  | 0.10    | 0.66 | -0.81  | 0.08    | 0.73 |
| Clostridium_sensu_stricto_1   | -0.18  | 0.73    | 0.96 | -0.19  | 0.71    | 0.97 | -0.26  | 0.63    | 0.92 | -0.24  | 0.66    | 0.94 | -0.13  | 0.82    | 0.97 |
| Colidextribacter              | 0.90   | 0.44    | 0.84 | 1.08   | 0.36    | 0.83 | 1.35   | 0.30    | 0.85 | 1.39   | 0.29    | 0.83 | 1.69   | 0.20    | 0.74 |
| Collinsella                   | -0.01  | 0.99    | 0.99 | -0.08  | 0.87    | 0.98 | -0.19  | 0.71    | 0.95 | -0.21  | 0.68    | 0.94 | -0.22  | 0.67    | 0.91 |
| Coprobacter                   | 0.59   | 0.22    | 0.67 | 0.64   | 0.18    | 0.72 | 0.81   | 0.12    | 0.64 | 0.81   | 0.11    | 0.66 | 0.80   | 0.12    | 0.74 |
| Coprococcus                   | -0.33  | 0.57    | 0.94 | -0.29  | 0.62    | 0.94 | -0.14  | 0.81    | 0.96 | -0.13  | 0.83    | 0.96 | -0.07  | 0.91    | 0.97 |
| Defluviitaleaceae_UCG.011     | -0.97  | 0.22    | 0.67 | -0.92  | 0.24    | 0.75 | -0.88  | 0.29    | 0.85 | -0.86  | 0.30    | 0.86 | -0.99  | 0.24    | 0.74 |
| Desulfovibrio                 | -0.26  | 0.60    | 0.94 | -0.26  | 0.60    | 0.93 | -0.04  | 0.93    | 0.97 | -0.03  | 0.96    | 0.98 | -0.04  | 0.93    | 0.97 |
| Dialister                     | -0.01  | 0.98    | 0.99 | 0.00   | 0.99    | 0.99 | 0.03   | 0.95    | 0.97 | 0.01   | 0.98    | 0.98 | 0.09   | 0.82    | 0.97 |
| DNF00809                      | -0.70  | 0.44    | 0.84 | -0.64  | 0.48    | 0.89 | -0.51  | 0.60    | 0.92 | -0.49  | 0.61    | 0.92 | -0.43  | 0.65    | 0.91 |
| Dorea                         | -0.12  | 0.88    | 0.97 | -0.16  | 0.84    | 0.98 | 0.04   | 0.96    | 0.97 | 0.04   | 0.96    | 0.98 | -0.06  | 0.95    | 0.97 |
| DTU089                        | 0.63   | 0.40    | 0.84 | 0.61   | 0.41    | 0.88 | 0.68   | 0.39    | 0.85 | 0.73   | 0.36    | 0.87 | 0.69   | 0.38    | 0.88 |
| Eggerthella                   | 0.89   | 0.22    | 0.67 | 0.88   | 0.22    | 0.75 | 0.86   | 0.26    | 0.83 | 0.90   | 0.24    | 0.80 | 0.95   | 0.21    | 0.74 |
| Eisenbergiella                | -0.77  | 0.32    | 0.77 | -0.78  | 0.31    | 0.83 | -0.97  | 0.23    | 0.80 | -0.93  | 0.25    | 0.80 | -0.82  | 0.31    | 0.87 |
| Erysipelatoclostridium        | 0.05   | 0.95    | 0.99 | -0.01  | 0.99    | 0.99 | -0.36  | 0.66    | 0.92 | -0.31  | 0.70    | 0.94 | -0.14  | 0.87    | 0.97 |
| Erysipelotrichaceae_UCG.003   | -0.82  | 0.15    | 0.67 | -0.79  | 0.17    | 0.72 | -0.69  | 0.26    | 0.83 | -0.68  | 0.27    | 0.80 | -0.68  | 0.27    | 0.78 |
| Escherichia_Shigella          | 0.38   | 0.45    | 0.84 | 0.37   | 0.46    | 0.89 | 0.17   | 0.76    | 0.95 | 0.16   | 0.77    | 0.95 | 0.11   | 0.84    | 0.97 |
| Faecalibacterium              | -2.21  | 0.00    | 0.05 | -2.19  | 0.00    | 0.09 | -2.06  | 0.00    | 0.23 | -2.07  | 0.00    | 0.23 | -2.03  | 0.01    | 0.28 |
| Family_XIII_AD3011_group      | -0.09  | 0.90    | 0.97 | -0.01  | 0.98    | 0.99 | -0.52  | 0.49    | 0.88 | 0.56   | 0.46    | 0.89 | 0.48   | 0.53    | 0.88 |
| Family_XIII_UCG.001           | -0.15  | 0.86    | 0.97 | -0.06  | 0.94    | 0.99 | -0.02  | 0.98    | 0.98 | 0.03   | 0.97    | 0.98 | -0.05  | 0.95    | 0.97 |
| FD2005                        | -0.90  | 0.30    | 0.77 | -0.85  | 0.33    | 0.83 | -0.88  | 0.34    | 0.85 | -0.93  | 0.31    | 0.87 | -1.02  | 0.27    | 0.78 |
| Flavonifractor                | 0.18   | 0.81    | 0.96 | 0.13   | 0.86    | 0.98 | -0.13  | 0.87    | 0.97 | -0.14  | 0.86    | 0.97 | -0.04  | 0.96    | 0.97 |
| Fournierella                  | 0.43   | 0.57    | 0.94 | 0.42   | 0.58    | 0.92 | 0.56   | 0.49    | 0.88 | 0.58   | 0.47    | 0.89 | 0.59   | 0.47    | 0.88 |
| Frisingicoccus                | 0.81   | 0.16    | 0.67 | 0.83   | 0.15    | 0.70 | 1.11   | 0.07    | 0.64 | 1.12   | 0.06    | 0.66 | 1.12   | 0.07    | 0.73 |
| Fusicatenibacter              | -0.20  | 0.74    | 0.96 | -0.15  | 0.80    | 0.97 | 0.07   | 0.92    | 0.97 | 0.04   | 0.95    | 0.98 | 0.02   | 0.98    | 0.98 |
| Fusobacterium                 | 2.42   | 0.01    | 0.33 | 2.40   | 0.01    | 0.37 | 2.22   | 0.03    | 0.62 | 2.26   | 0.03    | 0.57 | 2.24   | 0.03    | 0.52 |
| GCA.900066575                 | -0.76  | 0.32    | 0.77 | -0.67  | 0.38    | 0.85 | -0.50  | 0.53    | 0.88 | -0.46  | 0.56    | 0.90 | -0.63  | 0.44    | 0.88 |
| GCA.900066755                 | -0.40  | 0.75    | 0.96 | -0.32  | 0.80    | 0.97 | -0.82  | 0.54    | 0.88 | -0.78  | 0.56    | 0.90 | -0.71  | 0.60    | 0.89 |
| Gordonibacter                 | 0.55   | 0.46    | 0.84 | 0.54   | 0.47    | 0.89 | 0.85   | 0.28    | 0.85 | 0.92   | 0.25    | 0.80 | 0.90   | 0.26    | 0.77 |
| Granulicatella                | -0.87  | 0.46    | 0.84 | -0.81  | 0.49    | 0.89 | -1.06  | 0.39    | 0.85 | -1.03  | 0.40    | 0.87 | -1.01  | 0.41    | 0.88 |
| Haemophilus                   | -0.73  | 0.21    | 0.67 | -0.69  | 0.24    | 0.75 | -0.55  | 0.37    | 0.85 | -0.53  | 0.39    | 0.87 | -0.54  | 0.38    | 0.88 |
| Harriflintia                  | 1.39   | 0.12    | 0.67 | 1.43   | 0.11    | 0.70 | 1.40   | 0.14    | 0.64 | 1.41   | 0.13    | 0.66 | 1.29   | 0.17    | 0.74 |
| Holdemana                     | -0.16  | 0.80    | 0.96 | -0.16  | 0.80    | 0.97 | 0.20   | 0.76    | 0.95 | 0.17   | 0.80    | 0.95 | 0.19   | 0.78    | 0.97 |

|                               |       |      |      |       |      |      |       |      |      |       |      |      |       |      |      |
|-------------------------------|-------|------|------|-------|------|------|-------|------|------|-------|------|------|-------|------|------|
| Holdemania                    | 0.85  | 0.52 | 0.90 | 0.86  | 0.51 | 0.89 | 0.80  | 0.56 | 0.89 | 0.85  | 0.54 | 0.90 | 0.93  | 0.50 | 0.88 |
| Hungatella                    | 0.58  | 0.42 | 0.84 | 0.53  | 0.46 | 0.89 | 0.08  | 0.92 | 0.97 | 0.10  | 0.89 | 0.98 | 0.15  | 0.84 | 0.97 |
| Hydrogenoanaerobacterium      | -1.74 | 0.02 | 0.33 | -1.67 | 0.02 | 0.45 | -1.55 | 0.05 | 0.64 | -1.53 | 0.06 | 0.66 | -1.53 | 0.06 | 0.73 |
| Incertae_Sedis                | -0.34 | 0.79 | 0.96 | -0.43 | 0.74 | 0.97 | -0.42 | 0.76 | 0.95 | -0.38 | 0.78 | 0.95 | -0.41 | 0.77 | 0.97 |
| Intestinibacter               | -0.94 | 0.15 | 0.67 | -1.05 | 0.11 | 0.70 | -1.30 | 0.06 | 0.64 | -1.31 | 0.06 | 0.66 | -1.20 | 0.09 | 0.73 |
| Intestinimonas                | 0.02  | 0.97 | 0.99 | 0.09  | 0.89 | 0.98 | 0.11  | 0.87 | 0.97 | 0.15  | 0.83 | 0.96 | 0.11  | 0.87 | 0.97 |
| Lachnoclostridium             | 2.30  | 0.09 | 0.67 | 2.17  | 0.11 | 0.70 | 1.17  | 0.43 | 0.88 | 1.13  | 0.45 | 0.89 | 1.09  | 0.47 | 0.88 |
| Lachnospira                   | -2.47 | 0.00 | 0.05 | -2.37 | 0.00 | 0.09 | -2.26 | 0.00 | 0.23 | -2.25 | 0.00 | 0.23 | -2.23 | 0.00 | 0.28 |
| Lachnospiraceae_FCS020_group  | -0.74 | 0.28 | 0.77 | -0.63 | 0.36 | 0.83 | -0.30 | 0.69 | 0.93 | -0.29 | 0.71 | 0.94 | -0.33 | 0.67 | 0.91 |
| Lachnospiraceae_ND3007_group  | 0.07  | 0.89 | 0.97 | 0.16  | 0.73 | 0.97 | 0.35  | 0.49 | 0.88 | 0.35  | 0.49 | 0.89 | 0.32  | 0.52 | 0.88 |
| Lachnospiraceae_NK4A136_group | -0.22 | 0.76 | 0.96 | -0.12 | 0.86 | 0.98 | 0.52  | 0.50 | 0.88 | 0.53  | 0.50 | 0.89 | 0.48  | 0.54 | 0.88 |
| Lachnospiraceae_UCG.001       | -0.45 | 0.37 | 0.84 | -0.43 | 0.39 | 0.85 | -0.27 | 0.61 | 0.92 | -0.27 | 0.61 | 0.92 | -0.31 | 0.55 | 0.88 |
| Lachnospiraceae_UCG.004       | 0.10  | 0.85 | 0.97 | 0.16  | 0.78 | 0.97 | 0.35  | 0.56 | 0.89 | 0.33  | 0.57 | 0.90 | 0.33  | 0.57 | 0.88 |
| Lachnospiraceae_UCG.010       | 0.29  | 0.72 | 0.96 | 0.40  | 0.63 | 0.94 | 0.84  | 0.33 | 0.85 | 0.85  | 0.33 | 0.87 | 0.77  | 0.38 | 0.88 |
| Lactobacillus                 | 0.37  | 0.66 | 0.96 | 0.21  | 0.80 | 0.97 | 0.11  | 0.90 | 0.97 | 0.09  | 0.92 | 0.98 | 0.41  | 0.65 | 0.91 |
| Lactococcus                   | 0.72  | 0.38 | 0.84 | 0.70  | 0.39 | 0.85 | 0.92  | 0.29 | 0.85 | 0.97  | 0.27 | 0.80 | 1.13  | 0.20 | 0.74 |
| Marvinbryantia                | 0.53  | 0.31 | 0.77 | 0.59  | 0.26 | 0.77 | 0.71  | 0.20 | 0.79 | 0.74  | 0.18 | 0.73 | 0.78  | 0.16 | 0.74 |
| Megasphaera                   | 0.08  | 0.89 | 0.97 | 0.02  | 0.97 | 0.99 | -0.21 | 0.74 | 0.95 | -0.23 | 0.71 | 0.94 | -0.15 | 0.81 | 0.97 |
| Monoglobus                    | -1.37 | 0.08 | 0.67 | -1.36 | 0.08 | 0.70 | -1.50 | 0.07 | 0.64 | -1.48 | 0.07 | 0.66 | -1.44 | 0.08 | 0.73 |
| Moryella                      | -0.41 | 0.64 | 0.94 | -0.32 | 0.72 | 0.97 | 0.07  | 0.94 | 0.97 | 0.07  | 0.94 | 0.98 | 0.10  | 0.91 | 0.97 |
| Negativibacillus              | 0.32  | 0.57 | 0.94 | 0.34  | 0.56 | 0.91 | 0.27  | 0.66 | 0.92 | 0.25  | 0.69 | 0.94 | 0.23  | 0.71 | 0.94 |
| NK4A214_group                 | 0.04  | 0.93 | 0.99 | 0.09  | 0.83 | 0.98 | 0.32  | 0.50 | 0.88 | 0.32  | 0.50 | 0.89 | 0.34  | 0.47 | 0.88 |
| Odoribacter                   | 0.45  | 0.32 | 0.77 | 0.42  | 0.34 | 0.83 | 0.70  | 0.14 | 0.64 | 0.71  | 0.14 | 0.66 | 0.61  | 0.20 | 0.74 |
| Oscillibacter                 | -1.03 | 0.17 | 0.67 | -0.95 | 0.21 | 0.73 | -0.69 | 0.38 | 0.85 | -0.68 | 0.39 | 0.87 | -0.72 | 0.36 | 0.88 |
| Oscillospira                  | -0.03 | 0.98 | 0.99 | -0.09 | 0.94 | 0.99 | -0.24 | 0.84 | 0.97 | -0.22 | 0.86 | 0.97 | -0.20 | 0.87 | 0.97 |
| Oxalobacter                   | -0.91 | 0.20 | 0.67 | -0.78 | 0.28 | 0.79 | -0.49 | 0.53 | 0.88 | -0.50 | 0.53 | 0.90 | -0.57 | 0.47 | 0.88 |
| Paludicola                    | -0.24 | 0.75 | 0.96 | -0.08 | 0.91 | 0.99 | 0.36  | 0.65 | 0.92 | 0.44  | 0.59 | 0.91 | 0.51  | 0.53 | 0.88 |
| Parabacteroides               | -0.14 | 0.79 | 0.96 | -0.24 | 0.65 | 0.95 | -0.32 | 0.58 | 0.90 | -0.31 | 0.59 | 0.91 | -0.24 | 0.67 | 0.91 |
| Paraprevotella                | -0.33 | 0.42 | 0.84 | -0.38 | 0.35 | 0.83 | -0.29 | 0.49 | 0.88 | -0.29 | 0.50 | 0.89 | -0.27 | 0.53 | 0.88 |
| Parasutterella                | -0.30 | 0.47 | 0.84 | -0.29 | 0.48 | 0.89 | -0.05 | 0.91 | 0.97 | -0.05 | 0.90 | 0.98 | -0.12 | 0.79 | 0.97 |
| Peptococcus                   | 1.06  | 0.17 | 0.67 | 1.13  | 0.14 | 0.70 | 1.68  | 0.04 | 0.64 | 1.71  | 0.04 | 0.65 | 1.81  | 0.03 | 0.52 |
| Phascolarctobacterium         | -0.16 | 0.68 | 0.96 | -0.19 | 0.63 | 0.94 | -0.17 | 0.67 | 0.92 | -0.15 | 0.71 | 0.94 | -0.22 | 0.60 | 0.89 |
| Phoceia                       | 1.60  | 0.10 | 0.67 | 1.61  | 0.10 | 0.70 | 1.72  | 0.10 | 0.64 | 1.70  | 0.10 | 0.66 | 1.79  | 0.09 | 0.73 |
| Prevotella                    | 0.33  | 0.39 | 0.84 | 0.27  | 0.48 | 0.89 | 0.27  | 0.51 | 0.88 | 0.25  | 0.54 | 0.90 | 0.24  | 0.55 | 0.88 |
| Romboutsia                    | -1.04 | 0.09 | 0.67 | -1.07 | 0.08 | 0.70 | -1.06 | 0.10 | 0.64 | -1.04 | 0.11 | 0.66 | -0.99 | 0.13 | 0.74 |
| Roseburia                     | -0.31 | 0.69 | 0.96 | -0.27 | 0.74 | 0.97 | -0.17 | 0.84 | 0.97 | -0.18 | 0.82 | 0.96 | -0.07 | 0.93 | 0.97 |
| Ruminococcus                  | 0.15  | 0.76 | 0.96 | 0.20  | 0.68 | 0.96 | 0.34  | 0.52 | 0.88 | 0.34  | 0.51 | 0.89 | 0.40  | 0.45 | 0.88 |
| Sellimonas                    | -0.92 | 0.17 | 0.67 | -0.87 | 0.20 | 0.72 | -0.61 | 0.39 | 0.85 | -0.60 | 0.40 | 0.87 | -0.62 | 0.39 | 0.88 |
| Shuttleworthia                | -0.27 | 0.67 | 0.96 | -0.15 | 0.82 | 0.98 | 0.32  | 0.64 | 0.92 | 0.33  | 0.64 | 0.94 | 0.50  | 0.48 | 0.88 |
| Slackia                       | 0.14  | 0.81 | 0.96 | 0.08  | 0.89 | 0.98 | 0.30  | 0.64 | 0.92 | 0.29  | 0.64 | 0.94 | 0.22  | 0.73 | 0.95 |
| Streptococcus                 | -1.25 | 0.14 | 0.67 | -1.25 | 0.14 | 0.70 | -1.51 | 0.10 | 0.64 | -1.49 | 0.11 | 0.66 | -1.30 | 0.16 | 0.74 |
| Subdoligranulum               | 0.30  | 0.61 | 0.94 | 0.37  | 0.53 | 0.90 | 0.54  | 0.40 | 0.85 | 0.54  | 0.39 | 0.87 | 0.52  | 0.41 | 0.88 |
| Sutterella                    | -0.19 | 0.59 | 0.94 | -0.25 | 0.48 | 0.89 | -0.33 | 0.38 | 0.85 | -0.32 | 0.39 | 0.87 | -0.30 | 0.43 | 0.88 |
| TM7x                          | 0.13  | 0.88 | 0.97 | 0.25  | 0.77 | 0.97 | 0.10  | 0.91 | 0.97 | 0.14  | 0.88 | 0.97 | 0.34  | 0.70 | 0.94 |
| Turicibacter                  | -1.01 | 0.21 | 0.67 | -1.07 | 0.18 | 0.72 | -1.18 | 0.15 | 0.64 | -1.16 | 0.16 | 0.66 | -1.19 | 0.15 | 0.74 |
| Tuzzerella                    | 0.86  | 0.12 | 0.67 | 0.81  | 0.15 | 0.70 | 0.92  | 0.12 | 0.64 | 0.92  | 0.13 | 0.66 | 0.97  | 0.11 | 0.73 |
| Tyzzerella                    | -1.30 | 0.09 | 0.67 | -1.30 | 0.09 | 0.70 | -1.29 | 0.12 | 0.64 | -1.34 | 0.11 | 0.66 | -1.23 | 0.15 | 0.74 |
| UBA1819                       | 0.33  | 0.73 | 0.96 | 0.33  | 0.73 | 0.97 | 0.24  | 0.81 | 0.96 | 0.30  | 0.77 | 0.95 | 0.23  | 0.82 | 0.97 |
| UCG.002                       | 0.23  | 0.60 | 0.94 | 0.28  | 0.52 | 0.89 | 0.61  | 0.21 | 0.80 | 0.63  | 0.20 | 0.76 | 0.58  | 0.23 | 0.74 |
| UCG.003                       | -0.37 | 0.44 | 0.84 | -0.28 | 0.56 | 0.91 | -0.02 | 0.97 | 0.97 | -0.02 | 0.97 | 0.98 | -0.06 | 0.92 | 0.97 |
| UCG.005                       | -0.27 | 0.63 | 0.94 | -0.25 | 0.66 | 0.95 | 0.17  | 0.79 | 0.95 | 0.20  | 0.75 | 0.95 | 0.11  | 0.85 | 0.97 |
| UCG.009                       | -1.01 | 0.22 | 0.67 | -0.90 | 0.27 | 0.77 | -0.79 | 0.36 | 0.85 | -0.75 | 0.38 | 0.87 | -0.85 | 0.33 | 0.88 |
| Veillonella                   | -0.64 | 0.31 | 0.77 | -0.60 | 0.34 | 0.83 | -0.57 | 0.38 | 0.85 | -0.56 | 0.40 | 0.87 | -0.51 | 0.44 | 0.88 |
| Victivallis                   | -1.39 | 0.02 | 0.33 | -1.32 | 0.02 | 0.45 | -1.12 | 0.07 | 0.64 | -1.10 | 0.08 | 0.66 | -1.02 | 0.11 | 0.73 |

Multivariable-adjusted regression models adjusted for:

Model 1: sequencing batch, age, race, gender, study center

Model 2: Model 1, with education

Model 3: Model 2, with physical activity, diet score, medication use, and smoking

Model 4: Model 3 with BMI

Model 5: Model 4 with hypertension and diabetes

eTable 35: Multivariable-adjusted regression coefficients, p-values, and false discovery rate (FDR)-adjusted p-values for genera among White participants with respect to RAVLT.

|                               | Model1 |         |      | Model2 |         |      | Model3 |         |      | Model4 |         |      | Model5 |         |      |
|-------------------------------|--------|---------|------|--------|---------|------|--------|---------|------|--------|---------|------|--------|---------|------|
|                               | beta   | p-value | FDR  | beta   | p-value | FDR  | beta   | p-value | FDR  | beta   | p-value | FDR  | beta   | p-value | FDR  |
| Acetanaerobacterium           | -0.08  | 0.69    | 0.85 | 0.04   | 0.86    | 0.96 | -0.13  | 0.53    | 0.85 | -0.14  | 0.49    | 0.81 | -0.19  | 0.35    | 0.72 |
| Acidaminococcus               | -0.20  | 0.01    | 0.09 | -0.14  | 0.05    | 0.25 | -0.16  | 0.03    | 0.41 | -0.16  | 0.03    | 0.42 | -0.16  | 0.04    | 0.40 |
| Actinomyces                   | 0.09   | 0.67    | 0.85 | 0.09   | 0.64    | 0.83 | 0.15   | 0.46    | 0.78 | 0.15   | 0.47    | 0.79 | 0.16   | 0.44    | 0.81 |
| Adlercreutzia                 | 0.16   | 0.15    | 0.32 | 0.17   | 0.10    | 0.29 | 0.12   | 0.27    | 0.66 | 0.12   | 0.28    | 0.72 | 0.12   | 0.28    | 0.72 |
| Agathobacter                  | 0.02   | 0.89    | 0.94 | 0.01   | 0.91    | 0.97 | -0.02  | 0.87    | 0.96 | 0.00   | 0.98    | 0.98 | 0.00   | 1.00    | 1.00 |
| Akkermansia                   | 0.09   | 0.19    | 0.38 | 0.08   | 0.27    | 0.50 | 0.06   | 0.36    | 0.75 | 0.06   | 0.37    | 0.75 | 0.06   | 0.39    | 0.77 |
| Alistipes                     | 0.25   | 0.02    | 0.12 | 0.24   | 0.03    | 0.22 | 0.11   | 0.34    | 0.73 | 0.10   | 0.36    | 0.75 | 0.11   | 0.36    | 0.72 |
| Anaerofilum                   | 0.23   | 0.13    | 0.30 | 0.15   | 0.33    | 0.59 | 0.13   | 0.39    | 0.76 | 0.12   | 0.41    | 0.78 | 0.12   | 0.43    | 0.81 |
| Anaerostipes                  | 0.05   | 0.79    | 0.89 | 0.02   | 0.92    | 0.97 | -0.02  | 0.92    | 0.96 | -0.04  | 0.83    | 0.96 | -0.04  | 0.85    | 1.00 |
| Anaerotruncus                 | -0.02  | 0.90    | 0.94 | -0.05  | 0.75    | 0.91 | -0.13  | 0.39    | 0.76 | -0.16  | 0.29    | 0.72 | -0.15  | 0.33    | 0.72 |
| Angelakisella                 | 0.33   | 0.12    | 0.30 | 0.24   | 0.24    | 0.48 | 0.11   | 0.60    | 0.88 | 0.12   | 0.59    | 0.88 | 0.07   | 0.73    | 0.95 |
| Bacteroides                   | -0.08  | 0.80    | 0.89 | -0.10  | 0.76    | 0.91 | -0.01  | 0.97    | 0.97 | -0.01  | 0.98    | 0.98 | -0.02  | 0.95    | 1.00 |
| Barnesiella                   | 0.19   | 0.00    | 0.05 | 0.18   | 0.00    | 0.08 | 0.13   | 0.04    | 0.41 | 0.13   | 0.04    | 0.42 | 0.13   | 0.04    | 0.41 |
| Bifidobacterium               | -0.04  | 0.63    | 0.80 | 0.02   | 0.77    | 0.91 | 0.02   | 0.85    | 0.96 | 0.01   | 0.88    | 0.98 | 0.01   | 0.93    | 1.00 |
| Bilophila                     | 0.12   | 0.18    | 0.37 | 0.13   | 0.14    | 0.34 | 0.10   | 0.25    | 0.66 | 0.10   | 0.28    | 0.72 | 0.09   | 0.30    | 0.72 |
| Blautia                       | -0.04  | 0.90    | 0.94 | -0.16  | 0.62    | 0.81 | -0.14  | 0.66    | 0.91 | -0.19  | 0.56    | 0.86 | -0.14  | 0.67    | 0.92 |
| Butyricoccus                  | 0.17   | 0.46    | 0.65 | 0.07   | 0.75    | 0.91 | -0.06  | 0.79    | 0.96 | -0.06  | 0.78    | 0.96 | -0.04  | 0.85    | 1.00 |
| Butyricimonas                 | 0.06   | 0.43    | 0.62 | 0.04   | 0.62    | 0.81 | 0.01   | 0.94    | 0.96 | 0.01   | 0.90    | 0.98 | 0.01   | 0.90    | 1.00 |
| CAG.56                        | 0.19   | 0.03    | 0.14 | 0.14   | 0.10    | 0.29 | 0.11   | 0.22    | 0.64 | 0.11   | 0.24    | 0.70 | 0.12   | 0.20    | 0.60 |
| Candidatus_Soleaferrea        | -0.26  | 0.15    | 0.32 | -0.32  | 0.06    | 0.25 | -0.25  | 0.15    | 0.53 | -0.26  | 0.14    | 0.55 | -0.28  | 0.12    | 0.53 |
| Caproiciproducens             | 0.02   | 0.87    | 0.94 | 0.05   | 0.70    | 0.90 | -0.02  | 0.88    | 0.96 | -0.03  | 0.85    | 0.96 | -0.03  | 0.84    | 1.00 |
| Christensenellaceae_R.7_group | 0.16   | 0.03    | 0.13 | 0.14   | 0.05    | 0.25 | 0.09   | 0.25    | 0.66 | 0.08   | 0.30    | 0.72 | 0.08   | 0.30    | 0.72 |
| Clostridium_sensu_stricto_1   | 0.16   | 0.07    | 0.21 | 0.17   | 0.05    | 0.25 | 0.17   | 0.06    | 0.44 | 0.16   | 0.08    | 0.45 | 0.13   | 0.15    | 0.55 |
| Colidextribacter              | -0.24  | 0.25    | 0.46 | -0.34  | 0.09    | 0.29 | -0.53  | 0.01    | 0.32 | -0.55  | 0.01    | 0.26 | -0.57  | 0.01    | 0.20 |
| Collinsella                   | -0.11  | 0.20    | 0.39 | -0.06  | 0.47    | 0.72 | -0.05  | 0.55    | 0.85 | -0.04  | 0.61    | 0.88 | -0.05  | 0.53    | 0.85 |
| Coprobacter                   | 0.03   | 0.72    | 0.86 | -0.01  | 0.95    | 0.98 | -0.06  | 0.47    | 0.78 | -0.06  | 0.45    | 0.79 | -0.06  | 0.47    | 0.82 |
| Coprococcus                   | 0.24   | 0.02    | 0.10 | 0.21   | 0.04    | 0.24 | 0.14   | 0.15    | 0.53 | 0.14   | 0.17    | 0.55 | 0.13   | 0.21    | 0.62 |
| Defluviitaleaceae_UCG.011     | 0.34   | 0.02    | 0.10 | 0.31   | 0.02    | 0.22 | 0.29   | 0.03    | 0.41 | 0.28   | 0.04    | 0.42 | 0.28   | 0.05    | 0.41 |
| Desulfovibrio                 | -0.03  | 0.75    | 0.88 | -0.02  | 0.78    | 0.91 | -0.07  | 0.41    | 0.78 | -0.08  | 0.37    | 0.75 | -0.07  | 0.43    | 0.81 |
| Dialister                     | 0.06   | 0.35    | 0.57 | 0.05   | 0.38    | 0.63 | 0.05   | 0.48    | 0.79 | 0.05   | 0.43    | 0.78 | 0.04   | 0.57    | 0.87 |
| DNF00809                      | 0.29   | 0.07    | 0.21 | 0.24   | 0.11    | 0.30 | 0.24   | 0.13    | 0.53 | 0.23   | 0.15    | 0.55 | 0.22   | 0.16    | 0.55 |
| Dorea                         | 0.06   | 0.70    | 0.85 | 0.09   | 0.51    | 0.74 | 0.03   | 0.81    | 0.96 | 0.03   | 0.81    | 0.96 | 0.06   | 0.68    | 0.92 |
| DTU089                        | 0.00   | 0.98    | 0.98 | 0.02   | 0.90    | 0.97 | -0.01  | 0.95    | 0.96 | -0.03  | 0.85    | 0.96 | -0.01  | 0.91    | 1.00 |
| Eggerthella                   | 0.00   | 0.98    | 0.98 | 0.01   | 0.93    | 0.98 | -0.03  | 0.80    | 0.96 | -0.04  | 0.72    | 0.94 | -0.03  | 0.81    | 1.00 |
| Eisenbergiella                | -0.19  | 0.16    | 0.34 | -0.18  | 0.17    | 0.37 | -0.20  | 0.14    | 0.53 | -0.23  | 0.09    | 0.49 | -0.21  | 0.12    | 0.53 |
| Erysipelatoclostridium        | -0.13  | 0.36    | 0.57 | -0.09  | 0.50    | 0.74 | -0.03  | 0.80    | 0.96 | -0.06  | 0.69    | 0.94 | -0.08  | 0.58    | 0.87 |
| Erysipelotrichaceae_UCG.003   | 0.07   | 0.46    | 0.65 | 0.05   | 0.58    | 0.80 | 0.05   | 0.62    | 0.89 | 0.05   | 0.64    | 0.89 | 0.04   | 0.71    | 0.94 |
| Escherichia_Shigella          | -0.05  | 0.55    | 0.73 | -0.04  | 0.61    | 0.81 | -0.02  | 0.79    | 0.96 | -0.02  | 0.81    | 0.96 | -0.01  | 0.91    | 1.00 |
| Faecalibacterium              | 0.22   | 0.06    | 0.18 | 0.22   | 0.06    | 0.25 | 0.21   | 0.08    | 0.44 | 0.21   | 0.08    | 0.45 | 0.20   | 0.10    | 0.49 |
| Family_XIII_AD3011_group      | 0.26   | 0.03    | 0.13 | 0.21   | 0.07    | 0.25 | 0.07   | 0.55    | 0.85 | 0.06   | 0.63    | 0.89 | 0.06   | 0.62    | 0.90 |
| Family_XIII_UCG.001           | 0.29   | 0.05    | 0.18 | 0.24   | 0.10    | 0.29 | 0.17   | 0.25    | 0.66 | 0.15   | 0.31    | 0.72 | 0.15   | 0.33    | 0.72 |
| FD2005                        | 0.05   | 0.75    | 0.88 | 0.01   | 0.97    | 1.00 | 0.06   | 0.69    | 0.94 | 0.08   | 0.60    | 0.88 | 0.06   | 0.69    | 0.92 |
| Flavonifractor                | -0.26  | 0.05    | 0.16 | -0.23  | 0.07    | 0.25 | -0.22  | 0.08    | 0.44 | -0.22  | 0.08    | 0.45 | -0.23  | 0.08    | 0.48 |
| Fournierella                  | 0.10   | 0.47    | 0.65 | 0.10   | 0.42    | 0.67 | 0.13   | 0.33    | 0.73 | 0.12   | 0.36    | 0.75 | 0.12   | 0.36    | 0.72 |
| Frisingicoccus                | -0.11  | 0.29    | 0.52 | -0.12  | 0.22    | 0.46 | -0.20  | 0.05    | 0.41 | -0.20  | 0.04    | 0.42 | -0.19  | 0.06    | 0.48 |
| Fusicatenibacter              | 0.16   | 0.13    | 0.30 | 0.12   | 0.23    | 0.46 | 0.06   | 0.57    | 0.85 | 0.07   | 0.51    | 0.82 | 0.07   | 0.51    | 0.83 |
| Fusobacterium                 | -0.15  | 0.39    | 0.59 | -0.14  | 0.40    | 0.65 | 0.02   | 0.88    | 0.96 | 0.01   | 0.94    | 0.98 | 0.00   | 0.99    | 1.00 |
| GCA.900066575                 | -0.03  | 0.83    | 0.91 | -0.09  | 0.47    | 0.72 | -0.16  | 0.21    | 0.64 | -0.18  | 0.17    | 0.55 | -0.21  | 0.11    | 0.53 |
| GCA.900066755                 | 0.38   | 0.08    | 0.24 | 0.33   | 0.12    | 0.30 | 0.37   | 0.10    | 0.49 | 0.35   | 0.12    | 0.52 | 0.34   | 0.13    | 0.54 |
| Gordonibacter                 | 0.17   | 0.20    | 0.39 | 0.18   | 0.17    | 0.37 | 0.11   | 0.42    | 0.78 | 0.09   | 0.51    | 0.82 | 0.10   | 0.45    | 0.82 |
| Granulicatella                | 0.20   | 0.33    | 0.56 | 0.15   | 0.45    | 0.70 | 0.21   | 0.31    | 0.73 | 0.20   | 0.33    | 0.75 | 0.22   | 0.29    | 0.72 |
| Haemophilus                   | 0.20   | 0.06    | 0.18 | 0.16   | 0.11    | 0.30 | 0.15   | 0.13    | 0.53 | 0.15   | 0.16    | 0.55 | 0.15   | 0.15    | 0.55 |
| Harryflintia                  | 0.05   | 0.76    | 0.88 | 0.02   | 0.88    | 0.97 | 0.02   | 0.90    | 0.96 | 0.01   | 0.92    | 0.98 | -0.01  | 0.95    | 1.00 |
| Holdemanela                   | 0.02   | 0.83    | 0.91 | 0.03   | 0.82    | 0.95 | -0.02  | 0.82    | 0.96 | -0.01  | 0.91    | 0.98 | -0.01  | 0.96    | 1.00 |

|                               |       |      |      |       |      |      |       |      |      |       |      |      |       |      |      |
|-------------------------------|-------|------|------|-------|------|------|-------|------|------|-------|------|------|-------|------|------|
| Holdemania                    | 0.02  | 0.95 | 0.96 | 0.00  | 1.00 | 1.00 | -0.04 | 0.87 | 0.96 | -0.06 | 0.80 | 0.96 | -0.12 | 0.61 | 0.90 |
| Hungatella                    | -0.38 | 0.00 | 0.05 | -0.34 | 0.00 | 0.10 | -0.24 | 0.06 | 0.43 | -0.25 | 0.05 | 0.42 | -0.24 | 0.06 | 0.48 |
| Hydrogenoanaerobacterium      | 0.35  | 0.01 | 0.09 | 0.30  | 0.02 | 0.20 | 0.20  | 0.13 | 0.53 | 0.18  | 0.17 | 0.55 | 0.19  | 0.16 | 0.55 |
| Incertae_Sedis                | 0.16  | 0.49 | 0.66 | 0.22  | 0.31 | 0.56 | 0.13  | 0.56 | 0.85 | 0.12  | 0.61 | 0.88 | 0.14  | 0.53 | 0.85 |
| Intestinibacter               | 0.14  | 0.22 | 0.41 | 0.21  | 0.06 | 0.25 | 0.20  | 0.08 | 0.44 | 0.21  | 0.07 | 0.45 | 0.20  | 0.09 | 0.48 |
| Intestinimonas                | 0.29  | 0.01 | 0.09 | 0.24  | 0.03 | 0.22 | 0.23  | 0.04 | 0.41 | 0.21  | 0.06 | 0.43 | 0.24  | 0.04 | 0.40 |
| Lachnoclostridium             | -0.53 | 0.03 | 0.13 | -0.43 | 0.07 | 0.25 | -0.20 | 0.43 | 0.78 | -0.18 | 0.47 | 0.79 | -0.15 | 0.56 | 0.87 |
| Lachnospira                   | 0.55  | 0.00 | 0.00 | 0.44  | 0.00 | 0.07 | 0.46  | 0.00 | 0.03 | 0.45  | 0.00 | 0.04 | 0.44  | 0.00 | 0.03 |
| Lachnospiraceae_FCS020_group  | 0.35  | 0.00 | 0.05 | 0.27  | 0.02 | 0.20 | 0.18  | 0.14 | 0.53 | 0.18  | 0.15 | 0.55 | 0.18  | 0.16 | 0.55 |
| Lachnospiraceae_ND3007_group  | 0.28  | 0.00 | 0.04 | 0.22  | 0.01 | 0.11 | 0.18  | 0.03 | 0.41 | 0.18  | 0.03 | 0.42 | 0.18  | 0.03 | 0.40 |
| Lachnospiraceae_NK4A136_group | 0.14  | 0.28 | 0.50 | 0.08  | 0.54 | 0.76 | -0.05 | 0.71 | 0.96 | -0.05 | 0.69 | 0.94 | -0.05 | 0.69 | 0.92 |
| Lachnospiraceae_UCG.001       | 0.23  | 0.01 | 0.09 | 0.21  | 0.01 | 0.16 | 0.20  | 0.02 | 0.41 | 0.20  | 0.02 | 0.42 | 0.20  | 0.02 | 0.37 |
| Lachnospiraceae_UCG.004       | 0.03  | 0.74 | 0.88 | 0.00  | 0.99 | 1.00 | 0.02  | 0.83 | 0.96 | 0.03  | 0.79 | 0.96 | 0.00  | 0.98 | 1.00 |
| Lachnospiraceae_UCG.010       | -0.10 | 0.52 | 0.69 | -0.16 | 0.25 | 0.48 | -0.21 | 0.14 | 0.53 | -0.21 | 0.13 | 0.55 | -0.20 | 0.16 | 0.55 |
| Lactobacillus                 | -0.29 | 0.04 | 0.16 | -0.19 | 0.18 | 0.39 | -0.20 | 0.16 | 0.53 | -0.19 | 0.18 | 0.56 | -0.19 | 0.19 | 0.60 |
| Lactococcus                   | 0.01  | 0.93 | 0.96 | 0.02  | 0.87 | 0.96 | 0.05  | 0.74 | 0.96 | 0.03  | 0.83 | 0.96 | 0.02  | 0.88 | 1.00 |
| Marvinbryantia                | 0.02  | 0.80 | 0.89 | -0.01 | 0.89 | 0.97 | 0.01  | 0.95 | 0.96 | 0.00  | 0.98 | 0.98 | -0.01 | 0.95 | 1.00 |
| Megasphaera                   | -0.18 | 0.09 | 0.24 | -0.14 | 0.17 | 0.38 | -0.10 | 0.35 | 0.73 | -0.09 | 0.40 | 0.78 | -0.10 | 0.34 | 0.72 |
| Monoglobus                    | 0.41  | 0.00 | 0.05 | 0.40  | 0.00 | 0.08 | 0.46  | 0.00 | 0.03 | 0.45  | 0.00 | 0.04 | 0.47  | 0.00 | 0.03 |
| Moryella                      | 0.30  | 0.05 | 0.18 | 0.23  | 0.12 | 0.31 | 0.12  | 0.45 | 0.78 | 0.12  | 0.45 | 0.79 | 0.11  | 0.46 | 0.82 |
| Negativibacillus              | -0.11 | 0.30 | 0.52 | -0.11 | 0.25 | 0.48 | -0.11 | 0.27 | 0.66 | -0.11 | 0.31 | 0.72 | -0.11 | 0.28 | 0.72 |
| NK4A214_group                 | 0.16  | 0.04 | 0.16 | 0.12  | 0.10 | 0.29 | 0.06  | 0.45 | 0.78 | 0.06  | 0.45 | 0.79 | 0.05  | 0.49 | 0.82 |
| Odoribacter                   | 0.08  | 0.33 | 0.56 | 0.09  | 0.24 | 0.48 | 0.01  | 0.93 | 0.96 | 0.00  | 0.97 | 0.98 | 0.00  | 0.98 | 1.00 |
| Oscillibacter                 | 0.28  | 0.03 | 0.14 | 0.23  | 0.08 | 0.27 | 0.11  | 0.40 | 0.77 | 0.10  | 0.43 | 0.78 | 0.10  | 0.46 | 0.82 |
| Oscillospira                  | -0.02 | 0.92 | 0.95 | 0.03  | 0.86 | 0.96 | 0.04  | 0.85 | 0.96 | 0.03  | 0.89 | 0.98 | 0.03  | 0.87 | 1.00 |
| Oxalobacter                   | 0.42  | 0.00 | 0.04 | 0.32  | 0.01 | 0.16 | 0.21  | 0.11 | 0.49 | 0.21  | 0.10 | 0.49 | 0.24  | 0.07 | 0.48 |
| Paludicola                    | 0.14  | 0.30 | 0.52 | 0.03  | 0.83 | 0.96 | -0.12 | 0.38 | 0.76 | -0.15 | 0.28 | 0.72 | -0.13 | 0.35 | 0.72 |
| Parabacteroides               | -0.13 | 0.18 | 0.37 | -0.06 | 0.51 | 0.74 | -0.03 | 0.75 | 0.96 | -0.03 | 0.72 | 0.94 | -0.04 | 0.66 | 0.92 |
| Paraprevotella                | 0.07  | 0.36 | 0.57 | 0.10  | 0.16 | 0.37 | 0.07  | 0.33 | 0.73 | 0.07  | 0.35 | 0.75 | 0.07  | 0.35 | 0.72 |
| Parasutterella                | 0.12  | 0.10 | 0.26 | 0.11  | 0.10 | 0.29 | 0.04  | 0.58 | 0.85 | 0.04  | 0.56 | 0.86 | 0.04  | 0.58 | 0.87 |
| Peptococcus                   | 0.11  | 0.40 | 0.59 | 0.07  | 0.61 | 0.81 | -0.02 | 0.86 | 0.96 | -0.03 | 0.81 | 0.96 | -0.02 | 0.88 | 1.00 |
| Phascolarctobacterium         | -0.03 | 0.63 | 0.80 | -0.02 | 0.77 | 0.91 | -0.01 | 0.85 | 0.96 | -0.02 | 0.75 | 0.96 | -0.01 | 0.87 | 1.00 |
| Phoceia                       | -0.15 | 0.39 | 0.59 | -0.15 | 0.37 | 0.63 | -0.21 | 0.21 | 0.64 | -0.20 | 0.24 | 0.70 | -0.23 | 0.19 | 0.60 |
| Prevotella                    | -0.16 | 0.02 | 0.10 | -0.12 | 0.07 | 0.25 | -0.12 | 0.07 | 0.44 | -0.12 | 0.08 | 0.45 | -0.12 | 0.09 | 0.48 |
| Romboutsia                    | 0.08  | 0.48 | 0.65 | 0.10  | 0.36 | 0.63 | 0.05  | 0.64 | 0.91 | 0.04  | 0.70 | 0.94 | 0.02  | 0.89 | 1.00 |
| Roseburia                     | 0.12  | 0.38 | 0.59 | 0.09  | 0.50 | 0.74 | 0.11  | 0.43 | 0.78 | 0.11  | 0.40 | 0.78 | 0.10  | 0.49 | 0.82 |
| Ruminococcus                  | 0.21  | 0.01 | 0.10 | 0.18  | 0.04 | 0.24 | 0.15  | 0.08 | 0.44 | 0.15  | 0.08 | 0.45 | 0.15  | 0.09 | 0.48 |
| Sellimonas                    | 0.30  | 0.01 | 0.09 | 0.26  | 0.02 | 0.22 | 0.27  | 0.02 | 0.41 | 0.27  | 0.02 | 0.42 | 0.28  | 0.02 | 0.37 |
| Shuttleworthia                | 0.29  | 0.01 | 0.09 | 0.21  | 0.06 | 0.25 | 0.11  | 0.33 | 0.73 | 0.11  | 0.34 | 0.75 | 0.12  | 0.29 | 0.72 |
| Slackia                       | -0.04 | 0.70 | 0.85 | 0.00  | 0.99 | 1.00 | -0.01 | 0.93 | 0.96 | -0.01 | 0.94 | 0.98 | -0.02 | 0.87 | 1.00 |
| Streptococcus                 | 0.12  | 0.43 | 0.62 | 0.12  | 0.39 | 0.64 | 0.20  | 0.19 | 0.61 | 0.17  | 0.26 | 0.72 | 0.18  | 0.26 | 0.72 |
| Subdoligranulum               | 0.23  | 0.03 | 0.14 | 0.18  | 0.07 | 0.25 | 0.11  | 0.28 | 0.68 | 0.11  | 0.29 | 0.72 | 0.10  | 0.34 | 0.72 |
| Sutterella                    | -0.07 | 0.27 | 0.49 | -0.03 | 0.57 | 0.80 | -0.02 | 0.74 | 0.96 | -0.02 | 0.71 | 0.94 | -0.03 | 0.62 | 0.90 |
| TM7x                          | 0.14  | 0.37 | 0.57 | 0.05  | 0.73 | 0.91 | 0.02  | 0.90 | 0.96 | 0.00  | 0.97 | 0.98 | 0.00  | 0.99 | 1.00 |
| Turicibacter                  | 0.36  | 0.01 | 0.09 | 0.40  | 0.00 | 0.08 | 0.41  | 0.00 | 0.08 | 0.40  | 0.00 | 0.10 | 0.38  | 0.01 | 0.20 |
| Tuzzerella                    | -0.23 | 0.02 | 0.11 | -0.19 | 0.04 | 0.25 | -0.19 | 0.05 | 0.43 | -0.19 | 0.05 | 0.43 | -0.21 | 0.03 | 0.40 |
| Tyzzelerella                  | 0.20  | 0.14 | 0.32 | 0.20  | 0.13 | 0.32 | 0.19  | 0.18 | 0.58 | 0.20  | 0.15 | 0.55 | 0.24  | 0.09 | 0.48 |
| UBA1819                       | -0.09 | 0.62 | 0.80 | -0.08 | 0.61 | 0.81 | -0.20 | 0.24 | 0.66 | -0.22 | 0.19 | 0.59 | -0.22 | 0.20 | 0.60 |
| UCG.002                       | 0.16  | 0.04 | 0.15 | 0.13  | 0.09 | 0.29 | 0.05  | 0.55 | 0.85 | 0.04  | 0.60 | 0.88 | 0.03  | 0.68 | 0.92 |
| UCG.003                       | 0.15  | 0.09 | 0.24 | 0.08  | 0.35 | 0.61 | 0.01  | 0.92 | 0.96 | 0.01  | 0.93 | 0.98 | 0.00  | 0.98 | 1.00 |
| UCG.005                       | 0.16  | 0.10 | 0.26 | 0.15  | 0.12 | 0.31 | 0.07  | 0.47 | 0.78 | 0.06  | 0.54 | 0.85 | 0.07  | 0.49 | 0.82 |
| UCG.009                       | 0.21  | 0.15 | 0.32 | 0.13  | 0.37 | 0.63 | 0.06  | 0.66 | 0.91 | 0.05  | 0.75 | 0.96 | 0.05  | 0.75 | 0.96 |
| Veillonella                   | 0.17  | 0.12 | 0.29 | 0.15  | 0.16 | 0.37 | 0.18  | 0.10 | 0.49 | 0.17  | 0.11 | 0.50 | 0.17  | 0.12 | 0.53 |
| Victivallis                   | 0.26  | 0.01 | 0.09 | 0.21  | 0.04 | 0.24 | 0.12  | 0.27 | 0.66 | 0.11  | 0.31 | 0.72 | 0.11  | 0.30 | 0.72 |

Multivariable-adjusted regression models adjusted for:

Model 1: sequencing batch, age, race, gender, study center

Model 2: Model 1, with education

Model 3: Model 2, with physical activity, diet score, medication use, and smoking

Model 4: Model 3 with BMI

Model 5: Model 4 with hypertension and diabetes

eTable 36: Multivariable-adjusted regression coefficients, p-values, and false discovery rate (FDR)-adjusted p-values for genera among White participants with respect to category fluency.

|                               | Model1 |         |      | Model2 |         |      | Model3 |         |      | Model4 |         |      | Model5 |         |      |
|-------------------------------|--------|---------|------|--------|---------|------|--------|---------|------|--------|---------|------|--------|---------|------|
|                               | beta   | p-value | FDR  | beta   | p-value | FDR  | beta   | p-value | FDR  | beta   | p-value | FDR  | beta   | p-value | FDR  |
| Acetanaerobacterium           | 0.11   | 0.86    | 0.98 | 0.46   | 0.43    | 0.83 | 0.30   | 0.62    | 0.88 | 0.27   | 0.66    | 0.87 | 0.11   | 0.86    | 0.92 |
| Acidaminococcus               | -0.40  | 0.06    | 0.53 | -0.23  | 0.28    | 0.77 | -0.17  | 0.46    | 0.85 | -0.16  | 0.48    | 0.86 | -0.17  | 0.47    | 0.85 |
| Actinomyces                   | 0.22   | 0.72    | 0.94 | 0.23   | 0.68    | 0.87 | 0.34   | 0.57    | 0.88 | 0.34   | 0.58    | 0.87 | 0.42   | 0.49    | 0.86 |
| Adlercreutzia                 | 0.26   | 0.41    | 0.89 | 0.30   | 0.32    | 0.79 | 0.31   | 0.34    | 0.77 | 0.31   | 0.35    | 0.79 | 0.28   | 0.40    | 0.82 |
| Agathobacter                  | 0.34   | 0.39    | 0.89 | 0.33   | 0.39    | 0.83 | 0.19   | 0.65    | 0.88 | 0.23   | 0.57    | 0.87 | 0.29   | 0.48    | 0.86 |
| Akkermansia                   | -0.21  | 0.32    | 0.87 | -0.26  | 0.19    | 0.77 | -0.30  | 0.15    | 0.72 | -0.31  | 0.14    | 0.68 | -0.33  | 0.12    | 0.59 |
| Alistipes                     | -0.22  | 0.51    | 0.89 | -0.26  | 0.41    | 0.83 | -0.41  | 0.23    | 0.76 | -0.42  | 0.23    | 0.75 | -0.48  | 0.17    | 0.59 |
| Anaerofilum                   | 0.22   | 0.63    | 0.93 | -0.05  | 0.90    | 0.95 | -0.13  | 0.77    | 0.90 | -0.15  | 0.74    | 0.88 | -0.13  | 0.78    | 0.90 |
| Anaerostipes                  | -0.18  | 0.75    | 0.94 | -0.28  | 0.61    | 0.87 | -0.51  | 0.37    | 0.79 | -0.56  | 0.32    | 0.78 | -0.56  | 0.33    | 0.80 |
| Anaerotruncus                 | -0.36  | 0.41    | 0.89 | -0.44  | 0.29    | 0.77 | -0.51  | 0.25    | 0.76 | -0.58  | 0.20    | 0.69 | -0.63  | 0.17    | 0.59 |
| Angelakisella                 | -0.17  | 0.78    | 0.94 | -0.45  | 0.46    | 0.86 | -0.61  | 0.35    | 0.77 | -0.60  | 0.36    | 0.79 | -0.62  | 0.35    | 0.80 |
| Bacteroides                   | -0.88  | 0.37    | 0.89 | -0.92  | 0.33    | 0.79 | -1.04  | 0.30    | 0.76 | -1.04  | 0.30    | 0.77 | -1.04  | 0.30    | 0.80 |
| Barnesiella                   | 0.57   | 0.00    | 0.12 | 0.54   | 0.00    | 0.24 | 0.56   | 0.00    | 0.36 | 0.56   | 0.00    | 0.36 | 0.57   | 0.00    | 0.31 |
| Bifidobacterium               | -0.43  | 0.08    | 0.54 | -0.25  | 0.30    | 0.78 | -0.24  | 0.32    | 0.77 | -0.25  | 0.31    | 0.78 | -0.25  | 0.32    | 0.80 |
| Bilophila                     | 0.42   | 0.12    | 0.58 | 0.43   | 0.09    | 0.73 | 0.54   | 0.04    | 0.70 | 0.53   | 0.05    | 0.61 | 0.55   | 0.04    | 0.59 |
| Blautia                       | -0.08  | 0.93    | 0.99 | -0.42  | 0.65    | 0.87 | -0.33  | 0.74    | 0.89 | -0.43  | 0.66    | 0.87 | -0.39  | 0.69    | 0.88 |
| Butyricoccus                  | 0.42   | 0.53    | 0.89 | 0.13   | 0.84    | 0.90 | -0.17  | 0.80    | 0.90 | -0.17  | 0.80    | 0.88 | -0.19  | 0.78    | 0.90 |
| Butyricimonas                 | 0.07   | 0.74    | 0.94 | 0.00   | 0.98    | 0.99 | -0.03  | 0.90    | 0.95 | -0.02  | 0.93    | 0.96 | -0.02  | 0.94    | 0.96 |
| CAG.56                        | 0.41   | 0.11    | 0.58 | 0.27   | 0.29    | 0.77 | 0.21   | 0.45    | 0.85 | 0.20   | 0.46    | 0.86 | 0.20   | 0.46    | 0.85 |
| Candidatus_Soleaferrea        | -0.25  | 0.63    | 0.93 | -0.43  | 0.39    | 0.83 | -0.31  | 0.56    | 0.88 | -0.32  | 0.55    | 0.87 | -0.43  | 0.43    | 0.84 |
| Caproiciproducens             | -0.62  | 0.15    | 0.64 | -0.54  | 0.20    | 0.77 | -0.58  | 0.19    | 0.76 | -0.59  | 0.18    | 0.68 | -0.63  | 0.16    | 0.59 |
| Christensenellaceae_R.7_group | 0.07   | 0.77    | 0.94 | 0.01   | 0.98    | 0.99 | -0.02  | 0.92    | 0.95 | -0.04  | 0.86    | 0.93 | -0.06  | 0.80    | 0.90 |
| Clostridium_sensu_stricto_1   | 0.27   | 0.31    | 0.87 | 0.28   | 0.27    | 0.77 | 0.27   | 0.31    | 0.76 | 0.25   | 0.34    | 0.79 | 0.24   | 0.38    | 0.82 |
| Collidextribacter             | 0.17   | 0.78    | 0.94 | -0.13  | 0.82    | 0.89 | -0.17  | 0.80    | 0.90 | -0.20  | 0.76    | 0.88 | -0.16  | 0.80    | 0.90 |
| Collinsella                   | 0.20   | 0.43    | 0.89 | 0.36   | 0.14    | 0.77 | 0.42   | 0.10    | 0.70 | 0.44   | 0.09    | 0.61 | 0.41   | 0.11    | 0.59 |
| Coprobacter                   | 0.18   | 0.48    | 0.89 | 0.07   | 0.77    | 0.89 | -0.10  | 0.69    | 0.88 | -0.11  | 0.67    | 0.87 | -0.11  | 0.66    | 0.86 |
| Coprococcus                   | 0.20   | 0.51    | 0.89 | 0.10   | 0.73    | 0.87 | -0.03  | 0.92    | 0.95 | -0.04  | 0.90    | 0.96 | -0.04  | 0.90    | 0.95 |
| Defluviitaleaceae_UCG.011     | 0.45   | 0.27    | 0.87 | 0.36   | 0.36    | 0.82 | 0.31   | 0.46    | 0.85 | 0.28   | 0.50    | 0.87 | 0.25   | 0.56    | 0.86 |
| Desulfovibrio                 | -0.69  | 0.01    | 0.20 | -0.68  | 0.01    | 0.31 | -0.66  | 0.01    | 0.57 | -0.68  | 0.01    | 0.48 | -0.67  | 0.01    | 0.54 |
| Dialister                     | 0.09   | 0.62    | 0.93 | 0.08   | 0.68    | 0.87 | 0.09   | 0.66    | 0.88 | 0.10   | 0.61    | 0.87 | 0.09   | 0.65    | 0.86 |
| DNF00809                      | -0.51  | 0.27    | 0.87 | -0.64  | 0.15    | 0.77 | -0.78  | 0.10    | 0.70 | -0.80  | 0.09    | 0.61 | -0.79  | 0.10    | 0.59 |
| Dorea                         | -0.24  | 0.56    | 0.89 | -0.14  | 0.73    | 0.87 | -0.22  | 0.59    | 0.88 | -0.22  | 0.60    | 0.87 | -0.21  | 0.62    | 0.86 |
| DTU089                        | -0.60  | 0.12    | 0.58 | -0.56  | 0.13    | 0.77 | -0.56  | 0.15    | 0.72 | -0.60  | 0.13    | 0.68 | -0.60  | 0.13    | 0.59 |
| Eggerthella                   | 0.16   | 0.67    | 0.94 | 0.18   | 0.62    | 0.87 | 0.13   | 0.72    | 0.89 | 0.11   | 0.78    | 0.88 | 0.14   | 0.71    | 0.89 |
| Eisenbergiella                | -0.57  | 0.16    | 0.64 | -0.54  | 0.17    | 0.77 | -0.61  | 0.13    | 0.72 | -0.68  | 0.09    | 0.61 | -0.63  | 0.13    | 0.59 |
| Erysipelatoclostridium        | -0.71  | 0.08    | 0.54 | -0.60  | 0.12    | 0.77 | -0.52  | 0.20    | 0.76 | -0.57  | 0.16    | 0.68 | -0.57  | 0.17    | 0.59 |
| Erysipelotrichaceae_UCG.003   | 0.29   | 0.33    | 0.87 | 0.23   | 0.42    | 0.83 | 0.25   | 0.42    | 0.85 | 0.24   | 0.43    | 0.86 | 0.21   | 0.49    | 0.86 |
| Escherichia.Shigella          | -0.20  | 0.46    | 0.89 | -0.17  | 0.50    | 0.87 | -0.01  | 0.96    | 0.96 | -0.01  | 0.98    | 0.98 | 0.02   | 0.93    | 0.96 |
| Faecalibacterium              | 0.05   | 0.88    | 0.99 | 0.03   | 0.93    | 0.96 | 0.08   | 0.82    | 0.90 | 0.09   | 0.81    | 0.88 | 0.08   | 0.83    | 0.91 |
| Family_XIII_AD3011_group      | -0.22  | 0.54    | 0.89 | -0.38  | 0.27    | 0.77 | -0.53  | 0.15    | 0.72 | -0.57  | 0.13    | 0.68 | -0.60  | 0.11    | 0.59 |
| Family_XIII_UCG.001           | 0.31   | 0.48    | 0.89 | 0.15   | 0.73    | 0.87 | 0.07   | 0.87    | 0.93 | 0.03   | 0.95    | 0.97 | -0.02  | 0.97    | 0.97 |
| FD2005                        | 0.39   | 0.39    | 0.89 | 0.26   | 0.54    | 0.87 | 0.32   | 0.48    | 0.86 | 0.37   | 0.43    | 0.86 | 0.31   | 0.51    | 0.86 |
| Flavonifractor                | -0.33  | 0.38    | 0.89 | -0.24  | 0.51    | 0.87 | -0.19  | 0.63    | 0.88 | -0.18  | 0.63    | 0.87 | -0.16  | 0.68    | 0.88 |
| Fournierella                  | -0.20  | 0.62    | 0.93 | -0.17  | 0.65    | 0.87 | -0.31  | 0.45    | 0.85 | -0.32  | 0.43    | 0.86 | -0.35  | 0.39    | 0.82 |
| Frisingicoccus                | 0.03   | 0.92    | 0.99 | -0.01  | 0.99    | 0.99 | -0.06  | 0.84    | 0.91 | -0.07  | 0.81    | 0.88 | -0.05  | 0.88    | 0.93 |
| Fusicatenibacter              | 0.60   | 0.05    | 0.52 | 0.49   | 0.09    | 0.73 | 0.43   | 0.17    | 0.74 | 0.45   | 0.15    | 0.68 | 0.44   | 0.16    | 0.59 |
| Fusobacterium                 | -0.12  | 0.82    | 0.95 | -0.09  | 0.85    | 0.90 | 0.16   | 0.76    | 0.90 | 0.13   | 0.80    | 0.88 | 0.13   | 0.80    | 0.90 |
| GCA.900066575                 | 0.01   | 0.99    | 0.99 | -0.18  | 0.63    | 0.87 | -0.18  | 0.65    | 0.88 | -0.22  | 0.59    | 0.87 | -0.33  | 0.41    | 0.82 |
| GCA.900066755                 | 0.19   | 0.76    | 0.94 | 0.06   | 0.92    | 0.96 | 0.24   | 0.72    | 0.89 | 0.21   | 0.76    | 0.88 | 0.20   | 0.77    | 0.90 |
| Gordonibacter                 | 0.24   | 0.53    | 0.89 | 0.26   | 0.49    | 0.87 | 0.24   | 0.55    | 0.88 | 0.20   | 0.62    | 0.87 | 0.23   | 0.56    | 0.86 |
| Granulicatella                | 0.45   | 0.46    | 0.89 | 0.31   | 0.60    | 0.87 | 0.46   | 0.45    | 0.85 | 0.44   | 0.47    | 0.86 | 0.48   | 0.44    | 0.84 |
| Haemophilus                   | 0.46   | 0.13    | 0.58 | 0.36   | 0.22    | 0.77 | 0.32   | 0.30    | 0.76 | 0.30   | 0.33    | 0.78 | 0.29   | 0.35    | 0.80 |
| Harryflintia                  | -0.04  | 0.94    | 0.99 | -0.11  | 0.80    | 0.89 | -0.03  | 0.94    | 0.96 | -0.05  | 0.92    | 0.96 | -0.12  | 0.80    | 0.90 |
| Holdemanella                  | -0.19  | 0.55    | 0.89 | -0.19  | 0.54    | 0.87 | -0.19  | 0.56    | 0.88 | -0.17  | 0.61    | 0.87 | -0.15  | 0.65    | 0.86 |

|                               |       |      |      |       |      |      |       |      |      |       |      |      |       |      |      |
|-------------------------------|-------|------|------|-------|------|------|-------|------|------|-------|------|------|-------|------|------|
| Holdemania                    | 0.48  | 0.48 | 0.89 | 0.43  | 0.51 | 0.87 | 0.27  | 0.70 | 0.88 | 0.22  | 0.74 | 0.88 | 0.16  | 0.82 | 0.90 |
| Hungatella                    | -0.96 | 0.01 | 0.20 | -0.84 | 0.02 | 0.42 | -0.74 | 0.05 | 0.70 | -0.76 | 0.04 | 0.61 | -0.75 | 0.05 | 0.59 |
| Hydrogenoanaerobacterium      | -0.36 | 0.34 | 0.87 | -0.53 | 0.15 | 0.77 | -0.69 | 0.08 | 0.70 | -0.73 | 0.07 | 0.61 | -0.75 | 0.06 | 0.59 |
| Incertae_Sedis                | 0.09  | 0.89 | 0.99 | 0.28  | 0.66 | 0.87 | 0.30  | 0.66 | 0.88 | 0.26  | 0.70 | 0.88 | 0.30  | 0.65 | 0.86 |
| Intestinibacter               | 0.00  | 0.99 | 0.99 | 0.20  | 0.53 | 0.87 | 0.15  | 0.66 | 0.88 | 0.16  | 0.64 | 0.87 | 0.15  | 0.66 | 0.86 |
| Intestinimonas                | -0.13 | 0.69 | 0.94 | -0.28 | 0.38 | 0.83 | -0.37 | 0.27 | 0.76 | -0.41 | 0.23 | 0.75 | -0.39 | 0.25 | 0.77 |
| Lachnoclostridium             | -0.16 | 0.82 | 0.95 | 0.15  | 0.82 | 0.89 | 0.52  | 0.48 | 0.86 | 0.56  | 0.45 | 0.86 | 0.65  | 0.39 | 0.82 |
| Lachnospira                   | 1.22  | 0.00 | 0.12 | 0.89  | 0.02 | 0.42 | 0.83  | 0.03 | 0.70 | 0.82  | 0.04 | 0.61 | 0.81  | 0.04 | 0.59 |
| Lachnospiraceae_FC5020_group  | 0.67  | 0.06 | 0.52 | 0.43  | 0.21 | 0.77 | 0.41  | 0.27 | 0.76 | 0.40  | 0.28 | 0.77 | 0.40  | 0.29 | 0.80 |
| Lachnospiraceae_ND3007_group  | 0.46  | 0.06 | 0.52 | 0.27  | 0.25 | 0.77 | 0.19  | 0.45 | 0.85 | 0.19  | 0.44 | 0.86 | 0.18  | 0.47 | 0.85 |
| Lachnospiraceae_NK4A136_group | 0.29  | 0.43 | 0.89 | 0.11  | 0.76 | 0.89 | -0.15 | 0.71 | 0.89 | -0.15 | 0.70 | 0.88 | -0.18 | 0.64 | 0.86 |
| Lachnospiraceae_UCG.001       | 0.27  | 0.29 | 0.87 | 0.23  | 0.36 | 0.82 | 0.17  | 0.52 | 0.88 | 0.17  | 0.53 | 0.87 | 0.14  | 0.59 | 0.86 |
| Lachnospiraceae_UCG.004       | 0.01  | 0.99 | 0.99 | -0.10 | 0.73 | 0.87 | -0.14 | 0.64 | 0.88 | -0.13 | 0.67 | 0.87 | -0.18 | 0.55 | 0.86 |
| Lachnospiraceae_UCG.010       | -0.56 | 0.19 | 0.73 | -0.76 | 0.07 | 0.73 | -0.81 | 0.06 | 0.70 | -0.82 | 0.06 | 0.61 | -0.81 | 0.06 | 0.59 |
| Lactobacillus                 | -0.75 | 0.08 | 0.54 | -0.44 | 0.29 | 0.77 | -0.37 | 0.39 | 0.83 | -0.35 | 0.42 | 0.86 | -0.24 | 0.59 | 0.86 |
| Lactococcus                   | 0.40  | 0.35 | 0.87 | 0.43  | 0.29 | 0.77 | 0.62  | 0.15 | 0.72 | 0.60  | 0.17 | 0.68 | 0.66  | 0.13 | 0.59 |
| Marvinbryantia                | 0.00  | 0.99 | 0.99 | -0.11 | 0.67 | 0.87 | -0.12 | 0.67 | 0.88 | -0.14 | 0.62 | 0.87 | -0.13 | 0.63 | 0.86 |
| Megasphaera                   | -0.29 | 0.34 | 0.87 | -0.16 | 0.58 | 0.87 | 0.08  | 0.81 | 0.90 | 0.10  | 0.76 | 0.88 | 0.11  | 0.73 | 0.89 |
| Monoglobus                    | 0.79  | 0.05 | 0.52 | 0.77  | 0.04 | 0.63 | 0.72  | 0.07 | 0.70 | 0.70  | 0.09 | 0.61 | 0.77  | 0.06 | 0.59 |
| Moryella                      | 0.78  | 0.08 | 0.54 | 0.58  | 0.18 | 0.77 | 0.49  | 0.29 | 0.76 | 0.49  | 0.29 | 0.77 | 0.48  | 0.31 | 0.80 |
| Negativibacillus              | -0.18 | 0.54 | 0.89 | -0.20 | 0.48 | 0.87 | -0.21 | 0.50 | 0.86 | -0.19 | 0.54 | 0.87 | -0.20 | 0.52 | 0.86 |
| NK4A214_group                 | -0.05 | 0.82 | 0.95 | -0.15 | 0.50 | 0.87 | -0.26 | 0.28 | 0.76 | -0.26 | 0.28 | 0.77 | -0.27 | 0.25 | 0.77 |
| Odoribacter                   | 0.02  | 0.94 | 0.99 | 0.06  | 0.80 | 0.89 | 0.02  | 0.92 | 0.95 | 0.02  | 0.95 | 0.97 | -0.01 | 0.97 | 0.97 |
| Oscillibacter                 | 0.30  | 0.45 | 0.89 | 0.13  | 0.72 | 0.87 | 0.02  | 0.95 | 0.96 | 0.01  | 0.98 | 0.98 | -0.03 | 0.95 | 0.96 |
| Oscillospira                  | 0.07  | 0.91 | 0.99 | 0.23  | 0.69 | 0.87 | 0.35  | 0.55 | 0.88 | 0.34  | 0.58 | 0.87 | 0.36  | 0.55 | 0.86 |
| Oxalobacter                   | 0.41  | 0.27 | 0.87 | 0.10  | 0.79 | 0.89 | 0.11  | 0.78 | 0.90 | 0.12  | 0.77 | 0.88 | 0.14  | 0.72 | 0.89 |
| Paludicola                    | -0.30 | 0.43 | 0.89 | -0.64 | 0.08 | 0.73 | -0.75 | 0.06 | 0.70 | -0.83 | 0.04 | 0.61 | -0.81 | 0.05 | 0.59 |
| Parabacteroides               | 0.08  | 0.77 | 0.94 | 0.28  | 0.29 | 0.77 | 0.41  | 0.14 | 0.72 | 0.40  | 0.15 | 0.68 | 0.41  | 0.14 | 0.59 |
| Paraprevotella                | -0.13 | 0.52 | 0.89 | -0.05 | 0.81 | 0.89 | -0.06 | 0.78 | 0.90 | -0.06 | 0.76 | 0.88 | -0.07 | 0.75 | 0.90 |
| Parasutterella                | 0.44  | 0.04 | 0.52 | 0.42  | 0.04 | 0.63 | 0.40  | 0.07 | 0.70 | 0.40  | 0.06 | 0.61 | 0.38  | 0.08 | 0.59 |
| Peptococcus                   | -0.17 | 0.66 | 0.94 | -0.32 | 0.41 | 0.83 | -0.41 | 0.31 | 0.76 | -0.43 | 0.29 | 0.77 | -0.39 | 0.34 | 0.80 |
| Phascolarctobacterium         | 0.01  | 0.95 | 0.99 | 0.05  | 0.78 | 0.89 | 0.10  | 0.62 | 0.88 | 0.08  | 0.68 | 0.87 | 0.10  | 0.64 | 0.86 |
| Phoceia                       | -0.49 | 0.34 | 0.87 | -0.49 | 0.32 | 0.79 | -0.53 | 0.30 | 0.76 | -0.51 | 0.33 | 0.78 | -0.50 | 0.33 | 0.80 |
| Prevotella                    | -0.05 | 0.79 | 0.94 | 0.08  | 0.68 | 0.87 | 0.08  | 0.68 | 0.88 | 0.10  | 0.62 | 0.87 | 0.10  | 0.64 | 0.86 |
| Romboutsia                    | 0.42  | 0.18 | 0.70 | 0.48  | 0.12 | 0.77 | 0.36  | 0.26 | 0.76 | 0.34  | 0.29 | 0.77 | 0.32  | 0.33 | 0.80 |
| Roseburia                     | 0.63  | 0.13 | 0.58 | 0.54  | 0.18 | 0.77 | 0.47  | 0.25 | 0.76 | 0.48  | 0.24 | 0.76 | 0.49  | 0.24 | 0.77 |
| Ruminococcus                  | 0.29  | 0.25 | 0.87 | 0.18  | 0.46 | 0.86 | 0.09  | 0.74 | 0.89 | 0.08  | 0.75 | 0.88 | 0.07  | 0.79 | 0.90 |
| Sellimonas                    | 0.71  | 0.04 | 0.52 | 0.60  | 0.08 | 0.73 | 0.66  | 0.07 | 0.70 | 0.65  | 0.07 | 0.61 | 0.68  | 0.06 | 0.59 |
| Shuttleworthia                | -0.14 | 0.68 | 0.94 | -0.41 | 0.21 | 0.77 | -0.57 | 0.10 | 0.70 | -0.58 | 0.10 | 0.61 | -0.51 | 0.14 | 0.59 |
| Slackia                       | -0.67 | 0.03 | 0.52 | -0.55 | 0.07 | 0.73 | -0.48 | 0.13 | 0.72 | -0.47 | 0.14 | 0.68 | -0.51 | 0.11 | 0.59 |
| Streptococcus                 | 0.14  | 0.75 | 0.94 | 0.15  | 0.72 | 0.87 | 0.44  | 0.34 | 0.77 | 0.38  | 0.41 | 0.86 | 0.43  | 0.36 | 0.80 |
| Subdoligranulum               | 0.82  | 0.01 | 0.20 | 0.69  | 0.02 | 0.42 | 0.54  | 0.08 | 0.70 | 0.54  | 0.09 | 0.61 | 0.52  | 0.10 | 0.59 |
| Sutterella                    | -0.01 | 0.98 | 0.99 | 0.10  | 0.57 | 0.87 | 0.12  | 0.52 | 0.88 | 0.12  | 0.54 | 0.87 | 0.12  | 0.53 | 0.86 |
| TM7x                          | 0.41  | 0.35 | 0.87 | 0.16  | 0.71 | 0.87 | 0.08  | 0.86 | 0.93 | 0.05  | 0.91 | 0.96 | 0.08  | 0.85 | 0.92 |
| Turicibacter                  | 0.68  | 0.10 | 0.58 | 0.80  | 0.05 | 0.63 | 0.76  | 0.06 | 0.70 | 0.74  | 0.07 | 0.61 | 0.70  | 0.09 | 0.59 |
| Tuzzerella                    | 0.15  | 0.59 | 0.93 | 0.27  | 0.34 | 0.79 | 0.32  | 0.28 | 0.76 | 0.32  | 0.28 | 0.77 | 0.31  | 0.29 | 0.80 |
| Tyzzerella                    | 0.58  | 0.15 | 0.64 | 0.57  | 0.14 | 0.77 | 0.54  | 0.19 | 0.76 | 0.58  | 0.17 | 0.68 | 0.74  | 0.08 | 0.59 |
| UBA1819                       | -0.62 | 0.22 | 0.79 | -0.61 | 0.21 | 0.77 | -0.62 | 0.22 | 0.76 | -0.67 | 0.19 | 0.68 | -0.67 | 0.19 | 0.65 |
| UCG.002                       | -0.07 | 0.74 | 0.94 | -0.17 | 0.43 | 0.83 | -0.30 | 0.21 | 0.76 | -0.32 | 0.19 | 0.68 | -0.36 | 0.14 | 0.59 |
| UCG.003                       | 0.11  | 0.66 | 0.94 | -0.10 | 0.70 | 0.87 | -0.16 | 0.54 | 0.88 | -0.16 | 0.54 | 0.87 | -0.17 | 0.51 | 0.86 |
| UCG.005                       | -0.10 | 0.72 | 0.94 | -0.15 | 0.59 | 0.87 | -0.30 | 0.33 | 0.77 | -0.33 | 0.29 | 0.77 | -0.35 | 0.26 | 0.77 |
| UCG.009                       | -0.17 | 0.68 | 0.94 | -0.43 | 0.29 | 0.77 | -0.58 | 0.17 | 0.74 | -0.63 | 0.14 | 0.68 | -0.69 | 0.11 | 0.59 |
| Veillonella                   | 0.23  | 0.47 | 0.89 | 0.16  | 0.60 | 0.87 | 0.17  | 0.59 | 0.88 | 0.16  | 0.62 | 0.87 | 0.15  | 0.64 | 0.86 |
| Victivallis                   | 0.50  | 0.10 | 0.58 | 0.35  | 0.24 | 0.77 | 0.25  | 0.42 | 0.85 | 0.23  | 0.46 | 0.86 | 0.27  | 0.40 | 0.82 |

Multivariable-adjusted regression models adjusted for:

Model 1: sequencing batch, age, race, gender, study center

Model 2: Model 1, with education

Model 3: Model 2, with physical activity, diet score, medication use, and smoking



Model 4: Model 3 with BMI

Model 5: Model 4 with hypertension and diabetes

eTable 37: Multivariable-adjusted regression coefficients, p-values, and false discovery rate (FDR)-adjusted p-values for genera among White participants with respect to letter fluency.

|                               | Model1 |         |      | Model2 |         |      | Model3 |         |      | Model4 |         |      | Model5 |         |      |
|-------------------------------|--------|---------|------|--------|---------|------|--------|---------|------|--------|---------|------|--------|---------|------|
|                               | beta   | p-value | FDR  | beta   | p-value | FDR  | beta   | p-value | FDR  | beta   | p-value | FDR  | beta   | p-value | FDR  |
| Acetanaerobacterium           | 0.69   | 0.64    | 0.94 | 1.33   | 0.35    | 0.87 | 1.21   | 0.41    | 0.94 | 1.07   | 0.47    | 0.92 | 0.83   | 0.57    | 0.93 |
| Acidaminococcus               | -1.21  | 0.02    | 0.89 | -0.91  | 0.08    | 0.87 | -0.69  | 0.20    | 0.94 | -0.66  | 0.22    | 0.92 | -0.63  | 0.24    | 0.93 |
| Actinomyces                   | -0.22  | 0.88    | 0.99 | -0.20  | 0.89    | 1.00 | 0.66   | 0.65    | 0.94 | 0.63   | 0.66    | 0.92 | 0.76   | 0.60    | 0.93 |
| Adlercreutzia                 | -1.27  | 0.09    | 0.89 | -1.20  | 0.11    | 0.87 | -1.67  | 0.03    | 0.82 | -1.70  | 0.03    | 0.82 | -1.66  | 0.03    | 0.92 |
| Agathobacter                  | -0.11  | 0.91    | 0.99 | -0.13  | 0.89    | 1.00 | -0.46  | 0.64    | 0.94 | -0.26  | 0.79    | 0.96 | -0.22  | 0.82    | 0.97 |
| Akkermansia                   | -0.45  | 0.37    | 0.94 | -0.54  | 0.27    | 0.87 | -0.69  | 0.17    | 0.94 | -0.71  | 0.16    | 0.84 | -0.67  | 0.18    | 0.93 |
| Alistipes                     | 0.79   | 0.32    | 0.93 | 0.71   | 0.36    | 0.87 | 0.19   | 0.82    | 0.94 | 0.14   | 0.86    | 0.98 | 0.16   | 0.85    | 0.97 |
| Anaerofilum                   | 0.46   | 0.67    | 0.94 | -0.04  | 0.97    | 1.00 | -0.42  | 0.70    | 0.94 | -0.50  | 0.65    | 0.92 | -0.48  | 0.66    | 0.93 |
| Anaerostipes                  | -0.15  | 0.91    | 0.99 | -0.34  | 0.79    | 1.00 | 0.03   | 0.98    | 0.99 | -0.20  | 0.89    | 0.98 | -0.04  | 0.98    | 0.99 |
| Anaerotruncus                 | -0.81  | 0.44    | 0.94 | -0.95  | 0.35    | 0.87 | -1.41  | 0.18    | 0.94 | -1.73  | 0.10    | 0.82 | -1.69  | 0.11    | 0.92 |
| Angelakisella                 | 2.87   | 0.05    | 0.89 | 2.39   | 0.10    | 0.87 | 1.73   | 0.26    | 0.94 | 1.78   | 0.25    | 0.92 | 1.47   | 0.34    | 0.93 |
| Bacteroides                   | -2.17  | 0.35    | 0.94 | -2.25  | 0.32    | 0.87 | -1.29  | 0.59    | 0.94 | -1.26  | 0.60    | 0.92 | -1.49  | 0.53    | 0.93 |
| Barnesiella                   | 0.96   | 0.03    | 0.89 | 0.93   | 0.03    | 0.87 | 0.79   | 0.08    | 0.82 | 0.79   | 0.08    | 0.82 | 0.77   | 0.09    | 0.92 |
| Bifidobacterium               | -0.65  | 0.27    | 0.93 | -0.31  | 0.59    | 1.00 | -0.32  | 0.59    | 0.94 | -0.35  | 0.55    | 0.92 | -0.36  | 0.54    | 0.93 |
| Bilophila                     | 0.96   | 0.13    | 0.89 | 0.99   | 0.11    | 0.87 | 1.04   | 0.10    | 0.82 | 0.98   | 0.13    | 0.82 | 0.91   | 0.15    | 0.93 |
| Blautia                       | -4.13  | 0.07    | 0.89 | -4.78  | 0.04    | 0.87 | -4.06  | 0.08    | 0.82 | -4.62  | 0.05    | 0.82 | -4.34  | 0.06    | 0.92 |
| Butyricoccus                  | -1.81  | 0.25    | 0.93 | -2.35  | 0.13    | 0.87 | -3.45  | 0.03    | 0.82 | -3.47  | 0.03    | 0.82 | -3.08  | 0.06    | 0.92 |
| Butyricimonas                 | -0.11  | 0.83    | 0.99 | -0.24  | 0.65    | 1.00 | -0.32  | 0.55    | 0.94 | -0.28  | 0.60    | 0.92 | -0.32  | 0.56    | 0.93 |
| CAG.56                        | 0.69   | 0.27    | 0.93 | 0.43   | 0.48    | 1.00 | 0.32   | 0.62    | 0.94 | 0.27   | 0.67    | 0.92 | 0.29   | 0.65    | 0.93 |
| Candidatus_Soleaferrea        | -0.95  | 0.45    | 0.94 | -1.28  | 0.30    | 0.87 | -0.82  | 0.52    | 0.94 | -0.87  | 0.49    | 0.92 | -1.02  | 0.42    | 0.93 |
| Caproiciproducers             | -0.40  | 0.70    | 0.97 | -0.25  | 0.81    | 1.00 | -0.58  | 0.59    | 0.94 | -0.65  | 0.54    | 0.92 | -0.61  | 0.56    | 0.93 |
| Christensenellaceae_R.7_group | 0.03   | 0.95    | 0.99 | -0.07  | 0.90    | 1.00 | -0.56  | 0.31    | 0.94 | -0.66  | 0.23    | 0.92 | -0.57  | 0.30    | 0.93 |
| Clostridium_sensu_stricto_1   | 0.89   | 0.16    | 0.89 | 0.92   | 0.13    | 0.87 | 0.80   | 0.21    | 0.94 | 0.70   | 0.27    | 0.92 | 0.57   | 0.38    | 0.93 |
| Collidextribacter             | 0.39   | 0.79    | 0.99 | -0.17  | 0.91    | 1.00 | -0.91  | 0.55    | 0.94 | -1.07  | 0.49    | 0.92 | -1.02  | 0.51    | 0.93 |
| Collinsella                   | -0.47  | 0.44    | 0.94 | -0.19  | 0.76    | 1.00 | -0.14  | 0.82    | 0.94 | -0.05  | 0.94    | 0.98 | -0.01  | 0.99    | 0.99 |
| Coprobacter                   | 0.79   | 0.19    | 0.93 | 0.61   | 0.30    | 0.87 | 0.33   | 0.59    | 0.94 | 0.31   | 0.62    | 0.92 | 0.33   | 0.59    | 0.93 |
| Coprococcus                   | 1.08   | 0.12    | 0.89 | 0.91   | 0.19    | 0.87 | 0.62   | 0.39    | 0.94 | 0.57   | 0.43    | 0.92 | 0.51   | 0.48    | 0.93 |
| Defluviitaleaceae_UCG.011     | -0.18  | 0.85    | 0.99 | -0.34  | 0.72    | 1.00 | -0.71  | 0.47    | 0.94 | -0.87  | 0.38    | 0.92 | -0.88  | 0.38    | 0.93 |
| Desulfovibrio                 | -0.71  | 0.24    | 0.93 | -0.68  | 0.26    | 0.87 | -0.97  | 0.12    | 0.82 | -1.05  | 0.09    | 0.82 | -1.02  | 0.10    | 0.92 |
| Dialister                     | 0.01   | 0.99    | 0.99 | -0.02  | 0.96    | 1.00 | 0.15   | 0.76    | 0.94 | 0.21   | 0.65    | 0.92 | 0.16   | 0.74    | 0.94 |
| DNF00809                      | -0.12  | 0.91    | 0.99 | -0.37  | 0.73    | 1.00 | -0.75  | 0.51    | 0.94 | -0.84  | 0.46    | 0.92 | -0.90  | 0.43    | 0.93 |
| Dorea                         | -1.09  | 0.27    | 0.93 | -0.90  | 0.36    | 0.87 | -0.80  | 0.42    | 0.94 | -0.80  | 0.42    | 0.92 | -0.77  | 0.44    | 0.93 |
| DTU089                        | -0.05  | 0.95    | 0.99 | 0.01   | 0.99    | 1.00 | -0.23  | 0.81    | 0.94 | -0.42  | 0.66    | 0.92 | -0.30  | 0.75    | 0.94 |
| Eggerthella                   | -0.44  | 0.62    | 0.94 | -0.41  | 0.64    | 1.00 | -0.04  | 0.96    | 0.99 | -0.18  | 0.84    | 0.98 | -0.08  | 0.93    | 0.99 |
| Eisenbergiella                | -0.45  | 0.64    | 0.94 | -0.41  | 0.67    | 1.00 | -0.38  | 0.69    | 0.94 | -0.67  | 0.49    | 0.92 | -0.47  | 0.63    | 0.93 |
| Erysipelatoclostridium        | -1.10  | 0.25    | 0.93 | -0.92  | 0.33    | 0.87 | -0.81  | 0.41    | 0.94 | -1.04  | 0.29    | 0.92 | -1.11  | 0.26    | 0.93 |
| Erysipelotrichaceae_UCG.003   | -0.26  | 0.71    | 0.97 | -0.37  | 0.59    | 1.00 | -0.51  | 0.49    | 0.94 | -0.54  | 0.46    | 0.92 | -0.48  | 0.51    | 0.93 |
| Escherichia.Shigella          | -0.76  | 0.23    | 0.93 | -0.72  | 0.24    | 0.87 | -0.37  | 0.57    | 0.94 | -0.34  | 0.60    | 0.92 | -0.41  | 0.53    | 0.93 |
| Faecalibacterium              | 0.26   | 0.75    | 0.98 | 0.21   | 0.80    | 1.00 | -0.12  | 0.89    | 0.96 | -0.09  | 0.91    | 0.98 | -0.08  | 0.93    | 0.99 |
| Family_XIII_AD3011_group      | 0.46   | 0.59    | 0.94 | 0.18   | 0.83    | 1.00 | -0.61  | 0.49    | 0.94 | -0.78  | 0.38    | 0.92 | -0.68  | 0.44    | 0.93 |
| Family_XIII_UCG.001           | 0.56   | 0.59    | 0.94 | 0.25   | 0.80    | 1.00 | -0.46  | 0.67    | 0.94 | -0.70  | 0.51    | 0.92 | -0.65  | 0.54    | 0.93 |
| FD2005                        | -0.07  | 0.95    | 0.99 | -0.30  | 0.78    | 1.00 | -0.36  | 0.74    | 0.94 | -0.17  | 0.88    | 0.98 | -0.22  | 0.84    | 0.97 |
| Flavonifractor                | -0.94  | 0.30    | 0.93 | -0.78  | 0.38    | 0.87 | -0.29  | 0.75    | 0.94 | -0.27  | 0.77    | 0.95 | -0.32  | 0.73    | 0.94 |
| Fournierella                  | -0.31  | 0.74    | 0.98 | -0.28  | 0.76    | 1.00 | -1.02  | 0.29    | 0.94 | -1.12  | 0.25    | 0.92 | -1.02  | 0.29    | 0.93 |
| Frisingicoccus                | 0.00   | 0.99    | 0.99 | -0.07  | 0.92    | 1.00 | -0.42  | 0.56    | 0.94 | -0.47  | 0.51    | 0.92 | -0.30  | 0.67    | 0.93 |
| Fusicatenibacter              | 0.32   | 0.66    | 0.94 | 0.12   | 0.87    | 1.00 | 0.09   | 0.90    | 0.96 | 0.19   | 0.80    | 0.96 | 0.30   | 0.68    | 0.93 |
| Fusobacterium                 | 1.52   | 0.21    | 0.93 | 1.56   | 0.19    | 0.87 | 2.44   | 0.04    | 0.82 | 2.32   | 0.06    | 0.82 | 2.07   | 0.09    | 0.92 |
| GCA.900066575                 | 0.54   | 0.56    | 0.94 | 0.20   | 0.83    | 1.00 | -0.11  | 0.91    | 0.96 | -0.28  | 0.77    | 0.95 | -0.47  | 0.62    | 0.93 |
| GCA.900066755                 | -1.07  | 0.48    | 0.94 | -1.33  | 0.37    | 0.87 | -0.75  | 0.64    | 0.94 | -0.95  | 0.55    | 0.92 | -1.12  | 0.48    | 0.93 |
| Gordonibacter                 | 0.08   | 0.93    | 0.99 | 0.11   | 0.90    | 1.00 | -0.20  | 0.83    | 0.94 | -0.41  | 0.66    | 0.92 | -0.42  | 0.66    | 0.93 |
| Granulicatella                | 0.03   | 0.98    | 0.99 | -0.29  | 0.84    | 1.00 | 0.21   | 0.89    | 0.96 | 0.10   | 0.95    | 0.98 | 0.29   | 0.84    | 0.97 |
| Haemophilus                   | 0.55   | 0.44    | 0.94 | 0.36   | 0.61    | 1.00 | 0.12   | 0.87    | 0.96 | 0.02   | 0.98    | 0.98 | 0.08   | 0.92    | 0.99 |
| Harryflintia                  | -0.48  | 0.67    | 0.94 | -0.62  | 0.57    | 1.00 | -0.84  | 0.46    | 0.94 | -0.90  | 0.42    | 0.92 | -1.21  | 0.28    | 0.93 |
| Holdemanella                  | -0.26  | 0.74    | 0.98 | -0.25  | 0.74    | 1.00 | -0.23  | 0.77    | 0.94 | -0.10  | 0.90    | 0.98 | -0.05  | 0.95    | 0.99 |

|                               |       |      |      |       |      |      |       |      |      |       |      |      |       |      |      |
|-------------------------------|-------|------|------|-------|------|------|-------|------|------|-------|------|------|-------|------|------|
| Holdemania                    | 1.83  | 0.26 | 0.93 | 1.73  | 0.27 | 0.87 | 1.56  | 0.34 | 0.94 | 1.35  | 0.41 | 0.92 | 0.87  | 0.59 | 0.93 |
| Hungatella                    | -1.31 | 0.14 | 0.89 | -1.10 | 0.20 | 0.87 | -0.86 | 0.34 | 0.94 | -0.96 | 0.29 | 0.92 | -0.71 | 0.43 | 0.93 |
| Hydrogenoanaerobacterium      | 0.92  | 0.31 | 0.93 | 0.62  | 0.49 | 1.00 | 0.21  | 0.82 | 0.94 | 0.03  | 0.97 | 0.98 | 0.07  | 0.94 | 0.99 |
| Incertae_Sedis                | 0.97  | 0.54 | 0.94 | 1.32  | 0.39 | 0.87 | 1.01  | 0.53 | 0.94 | 0.83  | 0.60 | 0.92 | 0.75  | 0.64 | 0.93 |
| Intestinibacter               | 0.42  | 0.60 | 0.94 | 0.78  | 0.32 | 0.87 | 0.52  | 0.53 | 0.94 | 0.58  | 0.48 | 0.92 | 0.63  | 0.45 | 0.93 |
| Intestinimonas                | 0.19  | 0.81 | 0.99 | -0.08 | 0.91 | 1.00 | -0.35 | 0.66 | 0.94 | -0.52 | 0.52 | 0.92 | -0.33 | 0.68 | 0.93 |
| Lachnoclostridium             | -2.43 | 0.15 | 0.89 | -1.88 | 0.26 | 0.87 | -0.12 | 0.95 | 0.99 | 0.07  | 0.97 | 0.98 | 0.03  | 0.99 | 0.99 |
| Lachnospira                   | 1.53  | 0.10 | 0.89 | 0.90  | 0.33 | 0.87 | 0.58  | 0.54 | 0.94 | 0.51  | 0.58 | 0.92 | 0.53  | 0.57 | 0.93 |
| Lachnospiraceae_FC5020_group  | 0.66  | 0.43 | 0.94 | 0.21  | 0.80 | 1.00 | -0.28 | 0.75 | 0.94 | -0.35 | 0.70 | 0.92 | -0.33 | 0.71 | 0.94 |
| Lachnospiraceae_ND3007_group  | 0.33  | 0.57 | 0.94 | -0.02 | 0.98 | 1.00 | -0.24 | 0.69 | 0.94 | -0.23 | 0.70 | 0.92 | -0.23 | 0.70 | 0.93 |
| Lachnospiraceae_NK4A136_group | 0.63  | 0.48 | 0.94 | 0.30  | 0.73 | 1.00 | -0.72 | 0.44 | 0.94 | -0.75 | 0.42 | 0.92 | -0.62 | 0.50 | 0.93 |
| Lachnospiraceae_UCG.001       | -0.27 | 0.66 | 0.94 | -0.36 | 0.55 | 1.00 | -0.63 | 0.32 | 0.94 | -0.63 | 0.31 | 0.92 | -0.60 | 0.34 | 0.93 |
| Lachnospiraceae_UCG.004       | 0.30  | 0.66 | 0.94 | 0.12  | 0.86 | 1.00 | 0.19  | 0.79 | 0.94 | 0.24  | 0.73 | 0.94 | 0.03  | 0.96 | 0.99 |
| Lachnospiraceae_UCG.010       | 0.56  | 0.58 | 0.94 | 0.21  | 0.83 | 1.00 | -0.12 | 0.91 | 0.96 | -0.16 | 0.88 | 0.98 | -0.20 | 0.84 | 0.97 |
| Lactobacillus                 | -1.01 | 0.33 | 0.93 | -0.44 | 0.67 | 1.00 | -0.51 | 0.62 | 0.94 | -0.41 | 0.70 | 0.92 | -0.29 | 0.79 | 0.97 |
| Lactococcus                   | -0.17 | 0.87 | 0.99 | -0.12 | 0.91 | 1.00 | 0.23  | 0.83 | 0.94 | 0.05  | 0.96 | 0.98 | -0.16 | 0.88 | 0.99 |
| Marvinbryantia                | -0.39 | 0.55 | 0.94 | -0.59 | 0.36 | 0.87 | -0.57 | 0.39 | 0.94 | -0.67 | 0.31 | 0.92 | -0.63 | 0.34 | 0.93 |
| Megasphaera                   | 0.03  | 0.96 | 0.99 | 0.27  | 0.71 | 1.00 | 0.84  | 0.27 | 0.94 | 0.95  | 0.21 | 0.92 | 0.86  | 0.26 | 0.93 |
| Monoglobus                    | 1.25  | 0.19 | 0.93 | 1.22  | 0.19 | 0.87 | 1.18  | 0.22 | 0.94 | 1.04  | 0.28 | 0.92 | 1.06  | 0.28 | 0.93 |
| Moryella                      | 0.33  | 0.76 | 0.98 | -0.03 | 0.97 | 1.00 | -0.60 | 0.59 | 0.94 | -0.58 | 0.60 | 0.92 | -0.58 | 0.60 | 0.93 |
| Negativibacillus              | -0.91 | 0.20 | 0.93 | -0.95 | 0.17 | 0.87 | -1.39 | 0.06 | 0.82 | -1.30 | 0.08 | 0.82 | -1.37 | 0.06 | 0.92 |
| NK4A214_group                 | -0.39 | 0.47 | 0.94 | -0.57 | 0.29 | 0.87 | -0.94 | 0.10 | 0.82 | -0.95 | 0.09 | 0.82 | -0.88 | 0.12 | 0.92 |
| Odoribacter                   | 0.55  | 0.32 | 0.93 | 0.63  | 0.24 | 0.87 | 0.19  | 0.74 | 0.94 | 0.15  | 0.80 | 0.96 | 0.12  | 0.83 | 0.97 |
| Oscillibacter                 | 0.24  | 0.80 | 0.99 | -0.06 | 0.95 | 1.00 | -0.33 | 0.73 | 0.94 | -0.41 | 0.67 | 0.92 | -0.41 | 0.67 | 0.93 |
| Oscillospira                  | 0.85  | 0.55 | 0.94 | 1.13  | 0.41 | 0.91 | 1.37  | 0.34 | 0.94 | 1.27  | 0.38 | 0.92 | 1.23  | 0.39 | 0.93 |
| Oxalobacter                   | 0.53  | 0.56 | 0.94 | -0.04 | 0.96 | 1.00 | -0.69 | 0.46 | 0.94 | -0.66 | 0.48 | 0.92 | -0.51 | 0.59 | 0.93 |
| Paludicola                    | 0.74  | 0.42 | 0.94 | 0.15  | 0.86 | 1.00 | -0.54 | 0.57 | 0.94 | -0.84 | 0.39 | 0.92 | -0.51 | 0.60 | 0.93 |
| Parabacteroides               | 0.10  | 0.88 | 0.99 | 0.49  | 0.46 | 0.99 | 0.58  | 0.39 | 0.94 | 0.53  | 0.44 | 0.92 | 0.52  | 0.44 | 0.93 |
| Paraprevotella                | 0.13  | 0.79 | 0.99 | 0.31  | 0.53 | 1.00 | 0.26  | 0.61 | 0.94 | 0.23  | 0.65 | 0.92 | 0.25  | 0.63 | 0.93 |
| Parasutterella                | 0.56  | 0.27 | 0.93 | 0.53  | 0.28 | 0.87 | 0.27  | 0.60 | 0.94 | 0.30  | 0.57 | 0.92 | 0.22  | 0.68 | 0.93 |
| Peptococcus                   | -1.44 | 0.13 | 0.89 | -1.71 | 0.06 | 0.87 | -2.36 | 0.01 | 0.82 | -2.47 | 0.01 | 0.82 | -2.32 | 0.02 | 0.92 |
| Phascolarctobacterium         | 0.24  | 0.62 | 0.94 | 0.32  | 0.49 | 1.00 | 0.24  | 0.62 | 0.94 | 0.15  | 0.75 | 0.95 | 0.19  | 0.69 | 0.93 |
| Phoceae                       | 0.02  | 0.99 | 0.99 | 0.01  | 1.00 | 1.00 | 0.05  | 0.97 | 0.99 | 0.20  | 0.87 | 0.98 | -0.08 | 0.95 | 0.99 |
| Prevotella                    | -0.22 | 0.65 | 0.94 | 0.03  | 0.95 | 1.00 | -0.25 | 0.61 | 0.94 | -0.17 | 0.73 | 0.94 | -0.12 | 0.80 | 0.97 |
| Romboutsia                    | 1.40  | 0.06 | 0.89 | 1.51  | 0.04 | 0.87 | 1.21  | 0.11 | 0.82 | 1.12  | 0.14 | 0.82 | 1.08  | 0.16 | 0.93 |
| Roseburia                     | 0.45  | 0.65 | 0.94 | 0.28  | 0.77 | 1.00 | 0.02  | 0.98 | 0.99 | 0.09  | 0.93 | 0.98 | 0.09  | 0.93 | 0.99 |
| Ruminococcus                  | -0.30 | 0.62 | 0.94 | -0.52 | 0.39 | 0.87 | -1.00 | 0.11 | 0.82 | -1.03 | 0.10 | 0.82 | -0.92 | 0.14 | 0.93 |
| Sellimonas                    | 1.29  | 0.12 | 0.89 | 1.07  | 0.19 | 0.87 | 0.93  | 0.28 | 0.94 | 0.91  | 0.29 | 0.92 | 0.88  | 0.30 | 0.93 |
| Shuttleworthia                | -0.55 | 0.49 | 0.94 | -1.05 | 0.18 | 0.87 | -1.32 | 0.11 | 0.82 | -1.34 | 0.11 | 0.82 | -1.33 | 0.11 | 0.92 |
| Slackia                       | -0.57 | 0.44 | 0.94 | -0.34 | 0.64 | 1.00 | -0.56 | 0.46 | 0.94 | -0.54 | 0.48 | 0.92 | -0.63 | 0.40 | 0.93 |
| Streptococcus                 | -1.68 | 0.11 | 0.89 | -1.65 | 0.11 | 0.87 | -1.24 | 0.26 | 0.94 | -1.62 | 0.14 | 0.82 | -1.54 | 0.16 | 0.93 |
| Subdoligranulum               | 0.24  | 0.75 | 0.98 | 0.01  | 0.99 | 1.00 | -0.57 | 0.46 | 0.94 | -0.59 | 0.44 | 0.92 | -0.61 | 0.42 | 0.93 |
| Sutterella                    | -0.20 | 0.66 | 0.94 | 0.00  | 1.00 | 1.00 | 0.01  | 0.99 | 0.99 | -0.02 | 0.97 | 0.98 | -0.06 | 0.90 | 0.99 |
| TM7x                          | -1.54 | 0.14 | 0.89 | -2.03 | 0.05 | 0.87 | -1.79 | 0.09 | 0.82 | -1.95 | 0.07 | 0.82 | -1.85 | 0.08 | 0.92 |
| Turicibacter                  | 1.59  | 0.11 | 0.89 | 1.80  | 0.06 | 0.87 | 1.55  | 0.11 | 0.82 | 1.45  | 0.14 | 0.82 | 1.20  | 0.22 | 0.93 |
| Tuzzerella                    | -1.08 | 0.11 | 0.89 | -0.88 | 0.19 | 0.87 | -0.83 | 0.24 | 0.94 | -0.82 | 0.25 | 0.92 | -0.92 | 0.19 | 0.93 |
| Tyzzerella                    | 0.86  | 0.37 | 0.94 | 0.85  | 0.36 | 0.87 | 1.35  | 0.18 | 0.94 | 1.51  | 0.13 | 0.82 | 1.82  | 0.07 | 0.92 |
| UBA1819                       | 0.25  | 0.83 | 0.99 | 0.27  | 0.82 | 1.00 | 0.31  | 0.80 | 0.94 | 0.09  | 0.94 | 0.98 | -0.02 | 0.99 | 0.99 |
| UCG.002                       | -0.35 | 0.52 | 0.94 | -0.53 | 0.32 | 0.87 | -1.24 | 0.03 | 0.82 | -1.31 | 0.02 | 0.82 | -1.33 | 0.02 | 0.92 |
| UCG.003                       | 0.51  | 0.39 | 0.94 | 0.15  | 0.80 | 1.00 | -0.24 | 0.70 | 0.94 | -0.25 | 0.69 | 0.92 | -0.25 | 0.69 | 0.93 |
| UCG.005                       | 0.11  | 0.87 | 0.99 | 0.04  | 0.96 | 1.00 | -0.70 | 0.35 | 0.94 | -0.83 | 0.26 | 0.92 | -0.71 | 0.34 | 0.93 |
| UCG.009                       | 0.01  | 0.99 | 0.99 | -0.45 | 0.65 | 1.00 | -1.03 | 0.31 | 0.94 | -1.24 | 0.22 | 0.92 | -1.14 | 0.26 | 0.93 |
| Veillonella                   | 0.82  | 0.29 | 0.93 | 0.69  | 0.36 | 0.87 | 0.81  | 0.30 | 0.94 | 0.75  | 0.33 | 0.92 | 0.82  | 0.29 | 0.93 |
| Victivallis                   | 1.24  | 0.09 | 0.89 | 0.96  | 0.18 | 0.87 | 0.25  | 0.74 | 0.94 | 0.14  | 0.85 | 0.98 | 0.25  | 0.74 | 0.94 |

Multivariable-adjusted regression models adjusted for:

Model 1: sequencing batch, age, race, gender, study center

Model 2: Model 1, with education

Model 3: Model 2, with physical activity, diet score, medication use, and smoking

Model 4: Model 3 with BMI

Model 5: Model 4 with hypertension and diabetes

eTable 38: Multivariable-adjusted regression coefficients, p-values, and false discovery rate (FDR)-adjusted p-values for genera among White participants with respect to MOCA.

|                               | Model1 |         |      | Model2 |         |      | Model3 |         |      | Model4 |         |      | Model5 |         |      |
|-------------------------------|--------|---------|------|--------|---------|------|--------|---------|------|--------|---------|------|--------|---------|------|
|                               | beta   | p-value | FDR  | beta   | p-value | FDR  | beta   | p-value | FDR  | beta   | p-value | FDR  | beta   | p-value | FDR  |
| Acetanaerobacterium           | -0.41  | 0.23    | 0.60 | -0.16  | 0.61    | 0.87 | -0.29  | 0.39    | 0.84 | -0.33  | 0.33    | 0.77 | -0.42  | 0.21    | 0.72 |
| Acidaminococcus               | -0.37  | 0.00    | 0.08 | -0.25  | 0.03    | 0.44 | -0.28  | 0.02    | 0.66 | -0.28  | 0.02    | 0.74 | -0.28  | 0.02    | 0.72 |
| Actinomyces                   | 0.33   | 0.32    | 0.62 | 0.35   | 0.27    | 0.77 | 0.48   | 0.15    | 0.79 | 0.47   | 0.15    | 0.74 | 0.49   | 0.13    | 0.72 |
| Adlercreutzia                 | -0.18  | 0.32    | 0.62 | -0.15  | 0.38    | 0.77 | -0.18  | 0.32    | 0.81 | -0.18  | 0.30    | 0.74 | -0.20  | 0.27    | 0.72 |
| Agathobacter                  | 0.00   | 1.00    | 1.00 | -0.01  | 0.97    | 0.98 | -0.07  | 0.75    | 0.95 | -0.02  | 0.92    | 0.98 | -0.01  | 0.95    | 0.98 |
| Akkermansia                   | 0.07   | 0.54    | 0.77 | 0.03   | 0.76    | 0.92 | 0.02   | 0.83    | 0.95 | 0.02   | 0.86    | 0.98 | 0.01   | 0.93    | 0.98 |
| Alistipes                     | 0.19   | 0.30    | 0.62 | 0.16   | 0.36    | 0.77 | 0.06   | 0.73    | 0.95 | 0.05   | 0.77    | 0.98 | 0.04   | 0.83    | 0.98 |
| Anaerofilum                   | -0.03  | 0.91    | 0.93 | -0.23  | 0.33    | 0.77 | -0.25  | 0.31    | 0.81 | -0.27  | 0.27    | 0.74 | -0.28  | 0.25    | 0.72 |
| Anaerostipes                  | 0.32   | 0.31    | 0.62 | 0.24   | 0.41    | 0.77 | 0.21   | 0.50    | 0.86 | 0.15   | 0.62    | 0.98 | 0.15   | 0.63    | 0.98 |
| Anaerotruncus                 | -0.19  | 0.43    | 0.71 | -0.25  | 0.28    | 0.77 | -0.32  | 0.19    | 0.79 | -0.39  | 0.11    | 0.74 | -0.39  | 0.12    | 0.72 |
| Angelakisella                 | 0.24   | 0.50    | 0.74 | 0.04   | 0.91    | 0.96 | 0.05   | 0.88    | 0.95 | 0.07   | 0.85    | 0.98 | 0.00   | 0.99    | 0.99 |
| Bacteroides                   | -0.55  | 0.32    | 0.62 | -0.58  | 0.26    | 0.77 | -0.65  | 0.23    | 0.80 | -0.64  | 0.24    | 0.74 | -0.65  | 0.23    | 0.72 |
| Barnesiella                   | 0.33   | 0.00    | 0.08 | 0.31   | 0.00    | 0.13 | 0.30   | 0.00    | 0.24 | 0.30   | 0.00    | 0.35 | 0.30   | 0.00    | 0.22 |
| Bifidobacterium               | -0.17  | 0.21    | 0.60 | -0.04  | 0.79    | 0.92 | -0.05  | 0.72    | 0.95 | -0.06  | 0.68    | 0.98 | -0.07  | 0.62    | 0.98 |
| Bilophila                     | 0.04   | 0.80    | 0.92 | 0.05   | 0.71    | 0.89 | 0.05   | 0.75    | 0.95 | 0.03   | 0.82    | 0.98 | 0.02   | 0.87    | 0.98 |
| Blautia                       | 0.13   | 0.81    | 0.92 | -0.11  | 0.83    | 0.93 | -0.12  | 0.82    | 0.95 | -0.25  | 0.65    | 0.98 | -0.15  | 0.78    | 0.98 |
| Butyricoccus                  | 0.35   | 0.35    | 0.62 | 0.14   | 0.68    | 0.88 | -0.02  | 0.95    | 0.97 | -0.03  | 0.94    | 0.98 | -0.02  | 0.95    | 0.98 |
| Butyricimonas                 | 0.12   | 0.35    | 0.62 | 0.07   | 0.56    | 0.84 | 0.03   | 0.83    | 0.95 | 0.03   | 0.78    | 0.98 | 0.03   | 0.80    | 0.98 |
| CAG.56                        | 0.32   | 0.03    | 0.30 | 0.22   | 0.12    | 0.74 | 0.19   | 0.20    | 0.79 | 0.18   | 0.23    | 0.74 | 0.20   | 0.18    | 0.72 |
| Candidatus_Soleaferrea        | -0.43  | 0.14    | 0.51 | -0.56  | 0.04    | 0.52 | -0.52  | 0.07    | 0.79 | -0.53  | 0.07    | 0.74 | -0.56  | 0.05    | 0.72 |
| Caproiciproducens             | -0.26  | 0.29    | 0.62 | -0.20  | 0.38    | 0.77 | -0.26  | 0.29    | 0.81 | -0.27  | 0.26    | 0.74 | -0.28  | 0.24    | 0.72 |
| Christensenellaceae_R.7_group | 0.24   | 0.05    | 0.34 | 0.20   | 0.09    | 0.71 | 0.17   | 0.17    | 0.79 | 0.15   | 0.22    | 0.74 | 0.15   | 0.24    | 0.72 |
| Clostridium_sensu_stricto_1   | 0.29   | 0.05    | 0.34 | 0.30   | 0.03    | 0.44 | 0.31   | 0.03    | 0.66 | 0.29   | 0.04    | 0.74 | 0.25   | 0.09    | 0.72 |
| Colidextribacter              | -0.13  | 0.70    | 0.87 | -0.35  | 0.27    | 0.77 | -0.36  | 0.30    | 0.81 | -0.40  | 0.26    | 0.74 | -0.43  | 0.22    | 0.72 |
| Collinsella                   | 0.03   | 0.86    | 0.92 | 0.14   | 0.30    | 0.77 | 0.12   | 0.39    | 0.84 | 0.14   | 0.30    | 0.74 | 0.12   | 0.39    | 0.81 |
| Coprobacter                   | -0.03  | 0.83    | 0.92 | -0.11  | 0.43    | 0.78 | -0.20  | 0.16    | 0.79 | -0.20  | 0.15    | 0.74 | -0.20  | 0.16    | 0.72 |
| Coprococcus                   | 0.19   | 0.26    | 0.62 | 0.12   | 0.45    | 0.81 | 0.05   | 0.76    | 0.95 | 0.04   | 0.82    | 0.98 | 0.01   | 0.95    | 0.98 |
| Defluviitaleaceae_UCG.011     | 0.09   | 0.68    | 0.86 | 0.03   | 0.90    | 0.96 | 0.03   | 0.91    | 0.95 | -0.01  | 0.97    | 0.98 | -0.03  | 0.89    | 0.98 |
| Desulfovibrio                 | -0.20  | 0.17    | 0.51 | -0.19  | 0.16    | 0.77 | -0.20  | 0.16    | 0.79 | -0.22  | 0.12    | 0.74 | -0.20  | 0.16    | 0.72 |
| Dialister                     | 0.12   | 0.27    | 0.62 | 0.10   | 0.29    | 0.77 | 0.08   | 0.47    | 0.85 | 0.09   | 0.38    | 0.79 | 0.07   | 0.51    | 0.92 |
| DNF00809                      | 0.55   | 0.03    | 0.30 | 0.46   | 0.06    | 0.57 | 0.45   | 0.08    | 0.79 | 0.43   | 0.10    | 0.74 | 0.42   | 0.10    | 0.72 |
| Dorea                         | -0.12  | 0.62    | 0.82 | -0.04  | 0.85    | 0.94 | -0.08  | 0.71    | 0.95 | -0.08  | 0.71    | 0.98 | -0.04  | 0.85    | 0.98 |
| DTU089                        | -0.04  | 0.86    | 0.92 | -0.02  | 0.94    | 0.97 | 0.03   | 0.87    | 0.95 | -0.01  | 0.97    | 0.98 | 0.00   | 0.99    | 0.99 |
| Eggerthella                   | -0.14  | 0.49    | 0.74 | -0.13  | 0.50    | 0.83 | -0.16  | 0.43    | 0.85 | -0.20  | 0.34    | 0.77 | -0.17  | 0.41    | 0.81 |
| Eisenbergiella                | -0.12  | 0.58    | 0.80 | -0.11  | 0.62    | 0.87 | -0.11  | 0.63    | 0.95 | -0.17  | 0.43    | 0.79 | -0.15  | 0.50    | 0.92 |
| Erysipelatoclostridium        | -0.47  | 0.04    | 0.30 | -0.40  | 0.06    | 0.57 | -0.34  | 0.13    | 0.79 | -0.39  | 0.08    | 0.74 | -0.43  | 0.05    | 0.72 |
| Erysipelotrichaceae_UCG.003   | 0.03   | 0.84    | 0.92 | -0.01  | 0.96    | 0.98 | 0.03   | 0.88    | 0.95 | 0.02   | 0.91    | 0.98 | -0.01  | 0.95    | 0.98 |
| Escherichia_Shigella          | -0.20  | 0.17    | 0.51 | -0.18  | 0.18    | 0.77 | -0.18  | 0.23    | 0.80 | -0.17  | 0.25    | 0.74 | -0.15  | 0.32    | 0.80 |
| Faecalibacterium              | 0.21   | 0.26    | 0.62 | 0.20   | 0.28    | 0.77 | 0.21   | 0.30    | 0.81 | 0.21   | 0.28    | 0.74 | 0.18   | 0.35    | 0.81 |
| Family_XIII_AD3011_group      | 0.27   | 0.17    | 0.51 | 0.16   | 0.38    | 0.77 | 0.06   | 0.75    | 0.95 | 0.03   | 0.89    | 0.98 | 0.02   | 0.94    | 0.98 |
| Family_XIII_UCG.001           | 0.23   | 0.35    | 0.62 | 0.11   | 0.63    | 0.87 | 0.11   | 0.66    | 0.95 | 0.05   | 0.82    | 0.98 | 0.03   | 0.89    | 0.98 |
| FD2005                        | -0.04  | 0.89    | 0.92 | -0.13  | 0.59    | 0.86 | -0.06  | 0.82    | 0.95 | -0.01  | 0.97    | 0.98 | -0.05  | 0.84    | 0.98 |
| Flavonifractor                | -0.30  | 0.16    | 0.51 | -0.23  | 0.24    | 0.77 | -0.18  | 0.40    | 0.84 | -0.17  | 0.41    | 0.79 | -0.18  | 0.39    | 0.81 |
| Fournierella                  | 0.11   | 0.60    | 0.82 | 0.13   | 0.53    | 0.83 | 0.12   | 0.59    | 0.95 | 0.10   | 0.65    | 0.98 | 0.09   | 0.67    | 0.98 |
| Frisingicoccus                | -0.03  | 0.85    | 0.92 | -0.06  | 0.71    | 0.89 | -0.12  | 0.48    | 0.85 | -0.13  | 0.43    | 0.79 | -0.10  | 0.53    | 0.92 |
| Fusicatenibacter              | 0.12   | 0.50    | 0.74 | 0.04   | 0.82    | 0.93 | 0.00   | 0.98    | 0.98 | 0.03   | 0.87    | 0.98 | 0.02   | 0.92    | 0.98 |
| Fusobacterium                 | -0.03  | 0.91    | 0.93 | -0.01  | 0.96    | 0.98 | 0.11   | 0.70    | 0.95 | 0.07   | 0.79    | 0.98 | 0.07   | 0.81    | 0.98 |
| GCA.900066575                 | 0.19   | 0.39    | 0.66 | 0.05   | 0.79    | 0.92 | 0.04   | 0.87    | 0.95 | 0.00   | 0.98    | 0.98 | -0.05  | 0.82    | 0.98 |
| GCA.900066755                 | -0.13  | 0.72    | 0.87 | -0.23  | 0.50    | 0.83 | -0.25  | 0.49    | 0.85 | -0.30  | 0.41    | 0.79 | -0.31  | 0.40    | 0.81 |
| Gordonibacter                 | -0.19  | 0.38    | 0.66 | -0.18  | 0.39    | 0.77 | -0.20  | 0.34    | 0.82 | -0.26  | 0.23    | 0.74 | -0.24  | 0.28    | 0.72 |
| Granulicatella                | -0.23  | 0.49    | 0.74 | -0.35  | 0.28    | 0.77 | -0.19  | 0.58    | 0.95 | -0.22  | 0.52    | 0.89 | -0.19  | 0.56    | 0.96 |
| Haemophilus                   | 0.31   | 0.07    | 0.37 | 0.23   | 0.15    | 0.77 | 0.25   | 0.13    | 0.79 | 0.23   | 0.17    | 0.74 | 0.23   | 0.17    | 0.72 |
| Harryflintia                  | -0.10  | 0.70    | 0.87 | -0.15  | 0.53    | 0.83 | -0.13  | 0.62    | 0.95 | -0.14  | 0.58    | 0.95 | -0.18  | 0.49    | 0.92 |
| Holdemania                    | 0.05   | 0.78    | 0.92 | 0.05   | 0.76    | 0.92 | 0.02   | 0.90    | 0.95 | 0.06   | 0.76    | 0.98 | 0.07   | 0.71    | 0.98 |

|                               |       |      |      |       |      |      |       |      |      |       |      |      |       |      |      |
|-------------------------------|-------|------|------|-------|------|------|-------|------|------|-------|------|------|-------|------|------|
| Holdemania                    | -0.26 | 0.50 | 0.74 | -0.30 | 0.40 | 0.77 | -0.37 | 0.32 | 0.81 | -0.42 | 0.26 | 0.74 | -0.51 | 0.17 | 0.72 |
| Hungatella                    | -0.51 | 0.01 | 0.22 | -0.42 | 0.03 | 0.44 | -0.31 | 0.13 | 0.79 | -0.33 | 0.10 | 0.74 | -0.32 | 0.12 | 0.72 |
| Hydrogenoanaerobacterium      | 0.21  | 0.33 | 0.62 | 0.09  | 0.65 | 0.87 | 0.01  | 0.95 | 0.97 | -0.03 | 0.89 | 0.98 | -0.03 | 0.91 | 0.98 |
| Incertae_Sedis                | -0.30 | 0.42 | 0.70 | -0.16 | 0.64 | 0.87 | -0.09 | 0.81 | 0.95 | -0.13 | 0.72 | 0.98 | -0.07 | 0.85 | 0.98 |
| Intestinibacter               | 0.19  | 0.32 | 0.62 | 0.33  | 0.06 | 0.57 | 0.36  | 0.05 | 0.66 | 0.37  | 0.05 | 0.74 | 0.36  | 0.06 | 0.72 |
| Intestinimonas                | 0.19  | 0.29 | 0.62 | 0.09  | 0.63 | 0.87 | 0.08  | 0.67 | 0.95 | 0.04  | 0.83 | 0.98 | 0.07  | 0.71 | 0.98 |
| Lachnoclostridium             | -1.09 | 0.01 | 0.14 | -0.88 | 0.02 | 0.44 | -0.78 | 0.05 | 0.66 | -0.74 | 0.07 | 0.74 | -0.67 | 0.10 | 0.72 |
| Lachnospira                   | 0.69  | 0.00 | 0.08 | 0.44  | 0.03 | 0.44 | 0.43  | 0.04 | 0.66 | 0.42  | 0.05 | 0.74 | 0.40  | 0.06 | 0.72 |
| Lachnospiraceae_FCS020_group  | 0.39  | 0.05 | 0.34 | 0.21  | 0.25 | 0.77 | 0.21  | 0.31 | 0.81 | 0.19  | 0.34 | 0.77 | 0.18  | 0.38 | 0.81 |
| Lachnospiraceae_ND3007_group  | 0.17  | 0.22 | 0.60 | 0.03  | 0.81 | 0.93 | -0.01 | 0.94 | 0.97 | -0.01 | 0.96 | 0.98 | -0.02 | 0.88 | 0.98 |
| Lachnospiraceae_NK4A136_group | 0.16  | 0.45 | 0.72 | 0.03  | 0.89 | 0.96 | -0.11 | 0.59 | 0.95 | -0.12 | 0.57 | 0.95 | -0.13 | 0.53 | 0.92 |
| Lachnospiraceae_UCG.001       | 0.15  | 0.29 | 0.62 | 0.12  | 0.37 | 0.77 | 0.05  | 0.71 | 0.95 | 0.05  | 0.71 | 0.98 | 0.05  | 0.72 | 0.98 |
| Lachnospiraceae_UCG.004       | 0.14  | 0.40 | 0.67 | 0.07  | 0.66 | 0.87 | 0.05  | 0.75 | 0.95 | 0.06  | 0.70 | 0.98 | 0.03  | 0.86 | 0.98 |
| Lachnospiraceae_UCG.010       | -0.09 | 0.71 | 0.87 | -0.23 | 0.31 | 0.77 | -0.30 | 0.21 | 0.79 | -0.31 | 0.19 | 0.74 | -0.29 | 0.23 | 0.72 |
| Lactobacillus                 | -0.36 | 0.13 | 0.51 | -0.14 | 0.55 | 0.84 | -0.06 | 0.80 | 0.95 | -0.03 | 0.88 | 0.98 | -0.02 | 0.94 | 0.98 |
| Lactococcus                   | -0.05 | 0.84 | 0.92 | -0.03 | 0.91 | 0.96 | 0.10  | 0.66 | 0.95 | 0.06  | 0.79 | 0.98 | 0.06  | 0.80 | 0.98 |
| Marvinbryantia                | 0.07  | 0.63 | 0.82 | 0.00  | 0.99 | 0.99 | -0.01 | 0.97 | 0.98 | -0.03 | 0.85 | 0.98 | -0.04 | 0.79 | 0.98 |
| Megasphaera                   | -0.25 | 0.14 | 0.51 | -0.16 | 0.32 | 0.77 | -0.05 | 0.76 | 0.95 | -0.03 | 0.87 | 0.98 | -0.04 | 0.83 | 0.98 |
| Monoglobus                    | 0.55  | 0.01 | 0.22 | 0.53  | 0.01 | 0.44 | 0.62  | 0.00 | 0.24 | 0.60  | 0.01 | 0.35 | 0.63  | 0.00 | 0.22 |
| Moryella                      | 0.54  | 0.03 | 0.30 | 0.39  | 0.10 | 0.71 | 0.30  | 0.24 | 0.80 | 0.31  | 0.23 | 0.74 | 0.30  | 0.23 | 0.72 |
| Negativibacillus              | -0.23 | 0.18 | 0.51 | -0.24 | 0.13 | 0.74 | -0.21 | 0.21 | 0.79 | -0.19 | 0.26 | 0.74 | -0.20 | 0.23 | 0.72 |
| NK4A214_group                 | 0.18  | 0.15 | 0.51 | 0.11  | 0.34 | 0.77 | 0.06  | 0.63 | 0.95 | 0.06  | 0.64 | 0.98 | 0.04  | 0.75 | 0.98 |
| Odoribacter                   | -0.06 | 0.62 | 0.82 | -0.04 | 0.77 | 0.92 | -0.09 | 0.47 | 0.85 | -0.10 | 0.43 | 0.79 | -0.11 | 0.39 | 0.81 |
| Oscillibacter                 | 0.16  | 0.47 | 0.74 | 0.04  | 0.84 | 0.94 | -0.03 | 0.90 | 0.95 | -0.04 | 0.84 | 0.98 | -0.06 | 0.77 | 0.98 |
| Oscillospira                  | 0.12  | 0.72 | 0.87 | 0.23  | 0.46 | 0.81 | 0.36  | 0.27 | 0.81 | 0.34  | 0.30 | 0.74 | 0.35  | 0.29 | 0.74 |
| Oxalobacter                   | 0.46  | 0.03 | 0.30 | 0.24  | 0.22 | 0.77 | 0.21  | 0.33 | 0.81 | 0.22  | 0.31 | 0.74 | 0.25  | 0.25 | 0.72 |
| Paludicola                    | 0.40  | 0.06 | 0.35 | 0.18  | 0.39 | 0.77 | 0.16  | 0.47 | 0.85 | 0.10  | 0.67 | 0.98 | 0.12  | 0.60 | 0.98 |
| Parabacteroides               | -0.06 | 0.68 | 0.86 | 0.08  | 0.59 | 0.86 | 0.13  | 0.39 | 0.84 | 0.12  | 0.43 | 0.79 | 0.11  | 0.48 | 0.91 |
| Paraprevotella                | -0.02 | 0.88 | 0.92 | 0.05  | 0.66 | 0.87 | 0.01  | 0.91 | 0.95 | 0.01  | 0.96 | 0.98 | 0.01  | 0.96 | 0.98 |
| Parasutterella                | 0.14  | 0.22 | 0.60 | 0.13  | 0.23 | 0.77 | 0.09  | 0.43 | 0.85 | 0.10  | 0.40 | 0.79 | 0.10  | 0.40 | 0.81 |
| Peptococcus                   | -0.04 | 0.85 | 0.92 | -0.14 | 0.49 | 0.83 | -0.17 | 0.44 | 0.85 | -0.20 | 0.38 | 0.79 | -0.18 | 0.41 | 0.81 |
| Phascolarctobacterium         | -0.02 | 0.86 | 0.92 | 0.01  | 0.91 | 0.96 | 0.05  | 0.66 | 0.95 | 0.03  | 0.81 | 0.98 | 0.04  | 0.70 | 0.98 |
| Phocea                        | -0.18 | 0.53 | 0.76 | -0.19 | 0.49 | 0.83 | -0.25 | 0.37 | 0.84 | -0.22 | 0.44 | 0.79 | -0.26 | 0.37 | 0.81 |
| Prevotella                    | -0.20 | 0.07 | 0.36 | -0.11 | 0.29 | 0.77 | -0.14 | 0.19 | 0.79 | -0.12 | 0.26 | 0.74 | -0.12 | 0.26 | 0.72 |
| Romboutsia                    | 0.03  | 0.88 | 0.92 | 0.07  | 0.68 | 0.88 | 0.06  | 0.73 | 0.95 | 0.04  | 0.84 | 0.98 | -0.01 | 0.94 | 0.98 |
| Roseburia                     | 0.34  | 0.14 | 0.51 | 0.27  | 0.21 | 0.77 | 0.29  | 0.19 | 0.79 | 0.31  | 0.16 | 0.74 | 0.27  | 0.23 | 0.72 |
| Ruminococcus                  | 0.20  | 0.15 | 0.51 | 0.12  | 0.36 | 0.77 | 0.10  | 0.49 | 0.85 | 0.09  | 0.51 | 0.89 | 0.08  | 0.59 | 0.98 |
| Sellimonas                    | 0.32  | 0.11 | 0.46 | 0.23  | 0.21 | 0.77 | 0.22  | 0.26 | 0.81 | 0.22  | 0.27 | 0.74 | 0.25  | 0.21 | 0.72 |
| Shuttleworthia                | 0.12  | 0.50 | 0.74 | -0.06 | 0.72 | 0.89 | -0.19 | 0.31 | 0.81 | -0.20 | 0.29 | 0.74 | -0.18 | 0.35 | 0.81 |
| Slackia                       | 0.02  | 0.92 | 0.93 | 0.11  | 0.52 | 0.83 | 0.10  | 0.56 | 0.94 | 0.11  | 0.54 | 0.90 | 0.09  | 0.61 | 0.98 |
| Streptococcus                 | 0.29  | 0.23 | 0.60 | 0.30  | 0.19 | 0.77 | 0.51  | 0.04 | 0.66 | 0.44  | 0.08 | 0.74 | 0.45  | 0.08 | 0.72 |
| Subdoligranulum               | 0.47  | 0.01 | 0.14 | 0.38  | 0.02 | 0.44 | 0.33  | 0.05 | 0.66 | 0.33  | 0.05 | 0.74 | 0.31  | 0.07 | 0.72 |
| Sutterella                    | -0.17 | 0.10 | 0.46 | -0.10 | 0.33 | 0.77 | -0.10 | 0.32 | 0.81 | -0.11 | 0.30 | 0.74 | -0.12 | 0.23 | 0.72 |
| TM7x                          | 0.12  | 0.62 | 0.82 | -0.06 | 0.79 | 0.92 | -0.07 | 0.78 | 0.95 | -0.10 | 0.67 | 0.98 | -0.12 | 0.62 | 0.98 |
| Turicibacter                  | 0.27  | 0.25 | 0.62 | 0.35  | 0.11 | 0.73 | 0.37  | 0.09 | 0.79 | 0.35  | 0.12 | 0.74 | 0.30  | 0.18 | 0.72 |
| Tuzzerella                    | -0.30 | 0.06 | 0.34 | -0.23 | 0.13 | 0.74 | -0.22 | 0.17 | 0.79 | -0.22 | 0.17 | 0.74 | -0.26 | 0.11 | 0.72 |
| Tyzzerella                    | 0.26  | 0.25 | 0.62 | 0.25  | 0.23 | 0.77 | 0.28  | 0.22 | 0.80 | 0.32  | 0.16 | 0.74 | 0.38  | 0.10 | 0.72 |
| UBA1819                       | -0.17 | 0.55 | 0.77 | -0.16 | 0.54 | 0.83 | -0.19 | 0.49 | 0.85 | -0.25 | 0.37 | 0.79 | -0.24 | 0.40 | 0.81 |
| UCG.002                       | 0.22  | 0.08 | 0.38 | 0.15  | 0.19 | 0.77 | 0.10  | 0.44 | 0.85 | 0.09  | 0.51 | 0.89 | 0.06  | 0.63 | 0.98 |
| UCG.003                       | 0.23  | 0.10 | 0.46 | 0.09  | 0.51 | 0.83 | 0.04  | 0.80 | 0.95 | 0.03  | 0.81 | 0.98 | 0.02  | 0.89 | 0.98 |
| UCG.005                       | 0.16  | 0.34 | 0.62 | 0.12  | 0.42 | 0.78 | 0.08  | 0.65 | 0.95 | 0.05  | 0.78 | 0.98 | 0.05  | 0.76 | 0.98 |
| UCG.009                       | 0.55  | 0.02 | 0.28 | 0.37  | 0.10 | 0.71 | 0.30  | 0.19 | 0.79 | 0.26  | 0.26 | 0.74 | 0.26  | 0.27 | 0.72 |
| Veillonella                   | 0.26  | 0.15 | 0.51 | 0.21  | 0.21 | 0.77 | 0.24  | 0.18 | 0.79 | 0.23  | 0.20 | 0.74 | 0.21  | 0.23 | 0.72 |
| Victivallis                   | 0.33  | 0.05 | 0.34 | 0.22  | 0.17 | 0.77 | 0.16  | 0.35 | 0.82 | 0.13  | 0.44 | 0.79 | 0.13  | 0.45 | 0.87 |

Multivariable-adjusted regression models adjusted for:

Model 1: sequencing batch, age, race, gender, study center

Model 2: Model 1, with education

Model 3: Model 2, with physical activity, diet score, medication use, and smoking

Model 4: Model 3 with BMI

Model 5: Model 4 with hypertension and diabetes

eTable 39: Multivariable-adjusted regression coefficients, p-values, and false discovery rate (FDR)-adjusted p-values for genera among White participants with respect to PC (1st).

|                               | Model1 |         |      | Model2 |         |      | Model3 |         |      | Model4 |         |      | Model5 |         |      |
|-------------------------------|--------|---------|------|--------|---------|------|--------|---------|------|--------|---------|------|--------|---------|------|
|                               | beta   | p-value | FDR  | beta   | p-value | FDR  | beta   | p-value | FDR  | beta   | p-value | FDR  | beta   | p-value | FDR  |
| Acetanaerobacterium           | -0.06  | 0.73    | 0.85 | 0.08   | 0.67    | 0.91 | 0.00   | 0.98    | 0.98 | -0.02  | 0.90    | 0.95 | -0.06  | 0.74    | 0.92 |
| Acidaminococcus               | -0.22  | 0.00    | 0.04 | -0.15  | 0.02    | 0.22 | -0.15  | 0.02    | 0.41 | -0.15  | 0.02    | 0.43 | -0.15  | 0.02    | 0.39 |
| Actinomyces                   | 0.09   | 0.64    | 0.84 | 0.09   | 0.59    | 0.88 | 0.20   | 0.26    | 0.78 | 0.19   | 0.27    | 0.79 | 0.21   | 0.24    | 0.82 |
| Adlercreutzia                 | -0.01  | 0.93    | 0.96 | 0.01   | 0.93    | 0.96 | -0.04  | 0.69    | 0.94 | -0.04  | 0.66    | 0.92 | -0.04  | 0.66    | 0.92 |
| Agathobacter                  | 0.06   | 0.62    | 0.84 | 0.06   | 0.63    | 0.88 | -0.01  | 0.92    | 0.96 | 0.01   | 0.90    | 0.95 | 0.02   | 0.87    | 0.94 |
| Akkermansia                   | 0.04   | 0.51    | 0.75 | 0.02   | 0.72    | 0.91 | 0.01   | 0.91    | 0.96 | 0.00   | 0.94    | 0.96 | 0.00   | 0.94    | 0.98 |
| Alistipes                     | 0.14   | 0.16    | 0.45 | 0.13   | 0.18    | 0.55 | 0.03   | 0.73    | 0.94 | 0.03   | 0.77    | 0.92 | 0.03   | 0.78    | 0.92 |
| Anaerofilum                   | 0.10   | 0.46    | 0.71 | -0.01  | 0.96    | 0.97 | -0.03  | 0.80    | 0.94 | -0.04  | 0.74    | 0.92 | -0.05  | 0.73    | 0.92 |
| Anaerostipes                  | -0.01  | 0.96    | 0.96 | -0.05  | 0.77    | 0.91 | -0.08  | 0.64    | 0.94 | -0.11  | 0.52    | 0.89 | -0.10  | 0.55    | 0.91 |
| Anaerotruncus                 | -0.10  | 0.43    | 0.70 | -0.14  | 0.27    | 0.73 | -0.19  | 0.14    | 0.70 | -0.23  | 0.07    | 0.63 | -0.23  | 0.08    | 0.68 |
| Angelakisella                 | 0.19   | 0.31    | 0.57 | 0.09   | 0.62    | 0.88 | 0.02   | 0.93    | 0.96 | 0.02   | 0.90    | 0.95 | -0.01  | 0.95    | 0.98 |
| Bacteroides                   | -0.38  | 0.20    | 0.48 | -0.40  | 0.15    | 0.49 | -0.36  | 0.21    | 0.74 | -0.36  | 0.22    | 0.75 | -0.38  | 0.19    | 0.78 |
| Barnesiella                   | 0.21   | 0.00    | 0.01 | 0.21   | 0.00    | 0.01 | -0.18  | 0.00    | 0.07 | 0.18   | 0.00    | 0.09 | 0.18   | 0.00    | 0.09 |
| Bifidobacterium               | -0.10  | 0.20    | 0.48 | -0.02  | 0.74    | 0.91 | -0.03  | 0.68    | 0.94 | -0.03  | 0.64    | 0.92 | -0.04  | 0.61    | 0.92 |
| Bilophila                     | 0.11   | 0.17    | 0.47 | 0.12   | 0.13    | 0.44 | 0.11   | 0.15    | 0.70 | 0.10   | 0.18    | 0.75 | 0.10   | 0.20    | 0.79 |
| Blautia                       | -0.15  | 0.62    | 0.84 | -0.28  | 0.31    | 0.74 | -0.24  | 0.41    | 0.86 | -0.30  | 0.29    | 0.79 | -0.27  | 0.35    | 0.83 |
| Butyricoccus                  | 0.02   | 0.93    | 0.96 | -0.10  | 0.61    | 0.88 | -0.23  | 0.23    | 0.77 | -0.24  | 0.23    | 0.77 | -0.21  | 0.28    | 0.83 |
| Butyricimonas                 | 0.05   | 0.44    | 0.70 | 0.03   | 0.69    | 0.91 | 0.00   | 0.98    | 0.98 | 0.00   | 0.96    | 0.97 | 0.00   | 0.98    | 0.98 |
| CAG.56                        | 0.21   | 0.01    | 0.10 | 0.15   | 0.05    | 0.35 | 0.12   | 0.13    | 0.70 | 0.11   | 0.15    | 0.75 | 0.12   | 0.13    | 0.71 |
| Candidatus_Soleaferrea        | -0.25  | 0.12    | 0.39 | -0.32  | 0.03    | 0.31 | -0.27  | 0.08    | 0.69 | -0.28  | 0.07    | 0.63 | -0.30  | 0.06    | 0.60 |
| Caproiciproducens             | -0.06  | 0.65    | 0.84 | -0.03  | 0.83    | 0.94 | -0.08  | 0.53    | 0.92 | -0.09  | 0.48    | 0.87 | -0.09  | 0.48    | 0.88 |
| Christensenellaceae_R.7_group | 0.13   | 0.04    | 0.24 | 0.11   | 0.08    | 0.37 | 0.06   | 0.36    | 0.85 | 0.05   | 0.45    | 0.86 | 0.05   | 0.42    | 0.87 |
| Clostridium_sensu_stricto_1   | 0.13   | 0.11    | 0.38 | 0.14   | 0.07    | 0.37 | 0.14   | 0.08    | 0.69 | 0.12   | 0.11    | 0.67 | 0.11   | 0.18    | 0.78 |
| Collidextribacter             | -0.16  | 0.40    | 0.67 | -0.28  | 0.11    | 0.42 | -0.34  | 0.07    | 0.69 | -0.36  | 0.05    | 0.61 | -0.37  | 0.05    | 0.57 |
| Collinsella                   | -0.02  | 0.76    | 0.86 | 0.04   | 0.62    | 0.88 | 0.04   | 0.57    | 0.94 | 0.05   | 0.46    | 0.87 | 0.05   | 0.49    | 0.88 |
| Coprobacter                   | 0.03   | 0.68    | 0.85 | -0.01  | 0.88    | 0.94 | -0.07  | 0.35    | 0.85 | -0.07  | 0.32    | 0.79 | -0.07  | 0.34    | 0.83 |
| Coprococcus                   | 0.19   | 0.03    | 0.22 | 0.16   | 0.07    | 0.37 | 0.10   | 0.26    | 0.78 | 0.09   | 0.29    | 0.79 | 0.08   | 0.34    | 0.83 |
| Defluviitaleaceae_UCG.011     | 0.18   | 0.14    | 0.43 | 0.15   | 0.21    | 0.61 | 0.11   | 0.36    | 0.85 | 0.09   | 0.44    | 0.86 | 0.09   | 0.46    | 0.88 |
| Desulfovibrio                 | -0.09  | 0.24    | 0.49 | -0.09  | 0.24    | 0.67 | -0.12  | 0.13    | 0.70 | -0.13  | 0.10    | 0.63 | -0.12  | 0.11    | 0.70 |
| Dialister                     | 0.04   | 0.45    | 0.70 | 0.04   | 0.50    | 0.87 | 0.03   | 0.57    | 0.94 | 0.04   | 0.47    | 0.87 | 0.03   | 0.58    | 0.92 |
| DNF00809                      | 0.17   | 0.22    | 0.49 | 0.12   | 0.36    | 0.74 | 0.08   | 0.58    | 0.94 | 0.07   | 0.63    | 0.92 | 0.06   | 0.66    | 0.92 |
| Dorea                         | -0.06  | 0.64    | 0.84 | -0.02  | 0.87    | 0.94 | -0.06  | 0.60    | 0.94 | -0.06  | 0.60    | 0.92 | -0.05  | 0.68    | 0.92 |
| DTU089                        | -0.08  | 0.51    | 0.75 | -0.06  | 0.57    | 0.88 | -0.08  | 0.49    | 0.92 | -0.10  | 0.37    | 0.79 | -0.09  | 0.42    | 0.87 |
| Eggerthella                   | -0.04  | 0.73    | 0.85 | -0.03  | 0.76    | 0.91 | -0.03  | 0.78    | 0.94 | -0.05  | 0.66    | 0.92 | -0.04  | 0.74    | 0.92 |
| Eisenbergiella                | -0.11  | 0.38    | 0.66 | -0.10  | 0.41    | 0.78 | -0.10  | 0.39    | 0.86 | -0.14  | 0.24    | 0.79 | -0.12  | 0.31    | 0.83 |
| Erysipelatoclostridium        | -0.25  | 0.04    | 0.23 | -0.21  | 0.06    | 0.37 | -0.15  | 0.19    | 0.74 | -0.18  | 0.12    | 0.70 | -0.20  | 0.10    | 0.70 |
| Erysipelotrichaceae_UCG.003   | 0.07   | 0.43    | 0.70 | 0.05   | 0.57    | 0.88 | 0.03   | 0.72    | 0.94 | 0.03   | 0.75    | 0.92 | 0.03   | 0.78    | 0.92 |
| Escherichia_Shigella          | -0.08  | 0.31    | 0.57 | -0.07  | 0.35    | 0.74 | -0.03  | 0.72    | 0.94 | -0.02  | 0.76    | 0.92 | -0.02  | 0.79    | 0.92 |
| Faecalibacterium              | 0.17   | 0.10    | 0.38 | 0.16   | 0.10    | 0.41 | 0.13   | 0.21    | 0.74 | 0.13   | 0.20    | 0.75 | 0.13   | 0.22    | 0.79 |
| Family_XIII_AD3011_group      | 0.15   | 0.16    | 0.45 | 0.09   | 0.36    | 0.74 | -0.02  | 0.88    | 0.95 | -0.04  | 0.73    | 0.92 | -0.03  | 0.76    | 0.92 |
| Family_XIII_UCG.001           | 0.15   | 0.25    | 0.49 | 0.09   | 0.46    | 0.84 | 0.04   | 0.76    | 0.94 | 0.01   | 0.94    | 0.96 | 0.01   | 0.94    | 0.98 |
| FD2005                        | 0.09   | 0.53    | 0.77 | 0.04   | 0.78    | 0.91 | 0.06   | 0.64    | 0.94 | 0.09   | 0.51    | 0.88 | 0.08   | 0.57    | 0.91 |
| Flavonifractor                | -0.23  | 0.05    | 0.24 | -0.20  | 0.07    | 0.37 | -0.15  | 0.19    | 0.74 | -0.15  | 0.20    | 0.75 | -0.15  | 0.18    | 0.78 |
| Fournierella                  | -0.01  | 0.93    | 0.96 | 0.00   | 0.98    | 0.98 | -0.04  | 0.77    | 0.94 | -0.05  | 0.69    | 0.92 | -0.04  | 0.72    | 0.92 |
| Frisingicoccus                | -0.08  | 0.37    | 0.66 | -0.10  | 0.26    | 0.72 | -0.15  | 0.08    | 0.69 | -0.16  | 0.07    | 0.63 | -0.14  | 0.10    | 0.70 |
| Fusicatenibacter              | 0.12   | 0.18    | 0.47 | 0.08   | 0.36    | 0.74 | 0.04   | 0.67    | 0.94 | 0.05   | 0.57    | 0.91 | 0.06   | 0.54    | 0.91 |
| Fusobacterium                 | -0.04  | 0.80    | 0.88 | -0.03  | 0.84    | 0.94 | 0.10   | 0.48    | 0.92 | 0.09   | 0.55    | 0.91 | 0.07   | 0.63    | 0.92 |
| GCA.900066575                 | 0.09   | 0.43    | 0.70 | 0.02   | 0.86    | 0.94 | -0.02  | 0.84    | 0.95 | -0.05  | 0.69    | 0.92 | -0.07  | 0.55    | 0.91 |
| GCA.900066755                 | 0.09   | 0.64    | 0.84 | 0.04   | 0.83    | 0.94 | 0.11   | 0.58    | 0.94 | 0.08   | 0.66    | 0.92 | 0.07   | 0.71    | 0.92 |
| Gordonibacter                 | -0.01  | 0.91    | 0.96 | -0.01  | 0.96    | 0.97 | -0.06  | 0.62    | 0.94 | -0.08  | 0.47    | 0.87 | -0.08  | 0.50    | 0.88 |
| Granulicatella                | 0.07   | 0.72    | 0.85 | 0.01   | 0.96    | 0.97 | 0.09   | 0.60    | 0.94 | 0.08   | 0.66    | 0.92 | 0.10   | 0.59    | 0.92 |
| Haemophilus                   | 0.18   | 0.05    | 0.24 | 0.14   | 0.10    | 0.41 | 0.13   | 0.16    | 0.70 | 0.11   | 0.20    | 0.75 | 0.12   | 0.19    | 0.78 |
| Harryflintia                  | -0.06  | 0.67    | 0.85 | -0.09  | 0.50    | 0.87 | -0.07  | 0.61    | 0.94 | -0.08  | 0.57    | 0.91 | -0.10  | 0.45    | 0.88 |
| Holdemanella                  | 0.01   | 0.92    | 0.96 | 0.01   | 0.91    | 0.96 | -0.02  | 0.80    | 0.94 | -0.01  | 0.94    | 0.96 | 0.00   | 0.98    | 0.98 |



|            |       |      |      |       |      |      |       |      |      |       |      |      |       |      |      |
|------------|-------|------|------|-------|------|------|-------|------|------|-------|------|------|-------|------|------|
| Holdemania | 0.07  | 0.73 | 0.85 | 0.05  | 0.78 | 0.91 | 0.03  | 0.87 | 0.95 | 0.01  | 0.98 | 0.98 | -0.04 | 0.82 | 0.93 |
| Hungatella | -0.31 | 0.01 | 0.08 | -0.26 | 0.01 | 0.20 | -0.17 | 0.11 | 0.70 | -0.19 | 0.09 | 0.63 | -0.17 | 0.12 | 0.70 |

|                               |       |      |      |       |      |      |       |      |      |       |      |      |       |      |      |
|-------------------------------|-------|------|------|-------|------|------|-------|------|------|-------|------|------|-------|------|------|
| Hydrogenoanaerobacterium      | 0.22  | 0.06 | 0.26 | 0.16  | 0.15 | 0.48 | 0.07  | 0.53 | 0.92 | 0.05  | 0.66 | 0.92 | 0.05  | 0.65 | 0.92 |
| Incertae_Sedis                | 0.09  | 0.64 | 0.84 | 0.17  | 0.37 | 0.74 | 0.15  | 0.43 | 0.87 | 0.13  | 0.50 | 0.88 | 0.14  | 0.47 | 0.88 |
| Intestinibacter               | 0.13  | 0.20 | 0.48 | 0.21  | 0.03 | 0.31 | 0.20  | 0.04 | 0.63 | 0.21  | 0.03 | 0.46 | 0.21  | 0.04 | 0.49 |
| Intestinimonas                | 0.11  | 0.27 | 0.53 | 0.05  | 0.57 | 0.88 | 0.03  | 0.74 | 0.94 | 0.01  | 0.89 | 0.95 | 0.03  | 0.75 | 0.92 |
| Lachnoclostridium             | -0.56 | 0.01 | 0.10 | -0.45 | 0.03 | 0.31 | -0.21 | 0.33 | 0.85 | -0.19 | 0.38 | 0.79 | -0.18 | 0.42 | 0.87 |
| Lachnospira                   | 0.51  | 0.00 | 0.00 | 0.38  | 0.00 | 0.03 | 0.36  | 0.00 | 0.07 | 0.36  | 0.00 | 0.09 | 0.35  | 0.00 | 0.09 |
| Lachnospiraceae_FC5020_group  | 0.30  | 0.00 | 0.08 | 0.21  | 0.04 | 0.34 | 0.14  | 0.19 | 0.74 | 0.14  | 0.21 | 0.75 | 0.14  | 0.22 | 0.79 |
| Lachnospiraceae_ND3007_group  | 0.14  | 0.06 | 0.29 | 0.06  | 0.37 | 0.74 | 0.01  | 0.84 | 0.95 | 0.02  | 0.82 | 0.95 | 0.01  | 0.85 | 0.94 |
| Lachnospiraceae_NK4A136_group | 0.12  | 0.29 | 0.56 | 0.05  | 0.66 | 0.91 | -0.10 | 0.39 | 0.86 | -0.10 | 0.37 | 0.79 | -0.10 | 0.39 | 0.87 |
| Lachnospiraceae_UCG.001       | 0.13  | 0.11 | 0.38 | 0.11  | 0.14 | 0.48 | 0.07  | 0.35 | 0.85 | 0.07  | 0.36 | 0.79 | 0.07  | 0.34 | 0.83 |
| Lachnospiraceae_UCG.004       | 0.06  | 0.48 | 0.73 | 0.02  | 0.78 | 0.91 | 0.01  | 0.91 | 0.96 | 0.02  | 0.85 | 0.95 | 0.00  | 0.96 | 0.98 |
| Lachnospiraceae_UCG.010       | -0.04 | 0.77 | 0.87 | -0.11 | 0.35 | 0.74 | -0.17 | 0.18 | 0.74 | -0.17 | 0.17 | 0.75 | -0.17 | 0.17 | 0.78 |
| Lactobacillus                 | -0.32 | 0.01 | 0.12 | -0.20 | 0.11 | 0.41 | -0.19 | 0.14 | 0.70 | -0.17 | 0.17 | 0.75 | -0.17 | 0.19 | 0.78 |
| Lactococcus                   | -0.05 | 0.69 | 0.85 | -0.04 | 0.74 | 0.91 | 0.00  | 0.98 | 0.98 | -0.02 | 0.88 | 0.95 | -0.03 | 0.80 | 0.92 |
| Marvinbryantia                | 0.02  | 0.80 | 0.88 | -0.02 | 0.78 | 0.91 | -0.03 | 0.71 | 0.94 | -0.04 | 0.60 | 0.92 | -0.04 | 0.60 | 0.92 |
| Megasphaera                   | -0.11 | 0.24 | 0.49 | -0.06 | 0.49 | 0.87 | 0.01  | 0.88 | 0.95 | 0.03  | 0.76 | 0.92 | 0.02  | 0.83 | 0.93 |
| Monoglobus                    | 0.33  | 0.01 | 0.08 | 0.32  | 0.00 | 0.15 | 0.33  | 0.00 | 0.15 | 0.32  | 0.01 | 0.23 | 0.33  | 0.00 | 0.18 |
| Moryella                      | 0.31  | 0.02 | 0.19 | 0.23  | 0.07 | 0.37 | 0.14  | 0.32 | 0.85 | 0.14  | 0.31 | 0.79 | 0.14  | 0.31 | 0.83 |
| Negativibacillus              | -0.15 | 0.09 | 0.36 | -0.16 | 0.06 | 0.37 | -0.17 | 0.06 | 0.69 | -0.16 | 0.08 | 0.63 | -0.16 | 0.07 | 0.60 |
| NK4A214_group                 | 0.09  | 0.20 | 0.48 | 0.05  | 0.43 | 0.82 | -0.01 | 0.88 | 0.95 | -0.01 | 0.87 | 0.95 | -0.01 | 0.88 | 0.94 |
| Odoribacter                   | 0.02  | 0.74 | 0.85 | 0.04  | 0.56 | 0.88 | -0.02 | 0.73 | 0.94 | -0.03 | 0.67 | 0.92 | -0.03 | 0.64 | 0.92 |
| Oscillibacter                 | 0.18  | 0.12 | 0.39 | 0.12  | 0.28 | 0.73 | 0.05  | 0.65 | 0.94 | 0.04  | 0.71 | 0.92 | 0.04  | 0.74 | 0.92 |
| Oscillospira                  | -0.01 | 0.95 | 0.96 | 0.05  | 0.76 | 0.91 | 0.11  | 0.51 | 0.92 | 0.10  | 0.56 | 0.91 | 0.10  | 0.56 | 0.91 |
| Oxalobacter                   | 0.29  | 0.01 | 0.11 | 0.17  | 0.12 | 0.44 | 0.10  | 0.36 | 0.85 | 0.11  | 0.34 | 0.79 | 0.13  | 0.27 | 0.83 |
| Paludicola                    | 0.15  | 0.21 | 0.48 | 0.02  | 0.85 | 0.94 | -0.08 | 0.52 | 0.92 | -0.11 | 0.33 | 0.79 | -0.09 | 0.45 | 0.88 |
| Parabacteroides               | -0.03 | 0.74 | 0.85 | 0.05  | 0.53 | 0.88 | 0.09  | 0.27 | 0.78 | 0.09  | 0.30 | 0.79 | 0.08  | 0.32 | 0.83 |
| Paraprevotella                | -0.01 | 0.93 | 0.96 | 0.03  | 0.63 | 0.88 | 0.01  | 0.83 | 0.95 | 0.01  | 0.88 | 0.95 | 0.01  | 0.88 | 0.94 |
| Parasutterella                | 0.11  | 0.08 | 0.35 | 0.11  | 0.08 | 0.38 | 0.05  | 0.42 | 0.86 | 0.05  | 0.39 | 0.79 | 0.05  | 0.43 | 0.88 |
| Peptococcus                   | -0.05 | 0.65 | 0.84 | -0.11 | 0.33 | 0.74 | -0.18 | 0.13 | 0.70 | -0.19 | 0.10 | 0.63 | -0.18 | 0.12 | 0.70 |
| Phascolarctobacterium         | -0.01 | 0.93 | 0.96 | 0.01  | 0.84 | 0.94 | 0.02  | 0.76 | 0.94 | 0.01  | 0.91 | 0.95 | 0.01  | 0.83 | 0.93 |
| Phoceia                       | -0.14 | 0.38 | 0.66 | -0.14 | 0.34 | 0.74 | -0.15 | 0.32 | 0.85 | -0.13 | 0.38 | 0.79 | -0.16 | 0.30 | 0.83 |
| Prevotella                    | -0.11 | 0.07 | 0.29 | -0.06 | 0.29 | 0.74 | -0.07 | 0.21 | 0.74 | -0.06 | 0.28 | 0.79 | -0.06 | 0.30 | 0.83 |
| Romboutsia                    | 0.13  | 0.18 | 0.47 | 0.15  | 0.09 | 0.41 | 0.11  | 0.25 | 0.78 | 0.10  | 0.31 | 0.79 | 0.08  | 0.38 | 0.87 |
| Roseburia                     | 0.15  | 0.23 | 0.49 | 0.12  | 0.33 | 0.74 | 0.10  | 0.41 | 0.86 | 0.11  | 0.37 | 0.79 | 0.10  | 0.41 | 0.87 |
| Ruminococcus                  | 0.11  | 0.14 | 0.43 | 0.07  | 0.34 | 0.74 | 0.02  | 0.77 | 0.94 | 0.02  | 0.80 | 0.94 | 0.02  | 0.77 | 0.92 |
| Sellimonas                    | 0.29  | 0.01 | 0.08 | 0.25  | 0.01 | 0.20 | 0.24  | 0.02 | 0.41 | 0.23  | 0.02 | 0.43 | 0.24  | 0.02 | 0.37 |
| Shuttleworthia                | 0.07  | 0.51 | 0.75 | -0.03 | 0.73 | 0.91 | -0.12 | 0.22 | 0.74 | -0.13 | 0.21 | 0.75 | -0.12 | 0.23 | 0.80 |
| Slackia                       | -0.12 | 0.23 | 0.49 | -0.07 | 0.46 | 0.84 | -0.08 | 0.37 | 0.85 | -0.08 | 0.38 | 0.79 | -0.09 | 0.32 | 0.83 |
| Streptococcus                 | 0.01  | 0.96 | 0.96 | 0.01  | 0.93 | 0.96 | 0.09  | 0.51 | 0.92 | 0.05  | 0.72 | 0.92 | 0.05  | 0.69 | 0.92 |
| Subdoligranulum               | 0.19  | 0.04 | 0.23 | 0.15  | 0.10 | 0.41 | 0.07  | 0.43 | 0.87 | 0.07  | 0.45 | 0.86 | 0.06  | 0.49 | 0.88 |
| Sutterella                    | -0.07 | 0.24 | 0.49 | -0.03 | 0.62 | 0.88 | -0.02 | 0.74 | 0.94 | -0.02 | 0.70 | 0.92 | -0.03 | 0.63 | 0.92 |
| TM7x                          | 0.05  | 0.72 | 0.85 | -0.05 | 0.67 | 0.91 | -0.06 | 0.64 | 0.94 | -0.08 | 0.54 | 0.91 | -0.08 | 0.55 | 0.91 |
| Turicibacter                  | 0.28  | 0.03 | 0.19 | 0.33  | 0.01 | 0.15 | 0.32  | 0.01 | 0.17 | 0.31  | 0.01 | 0.23 | 0.29  | 0.02 | 0.34 |
| Tuzzerella                    | -0.20 | 0.02 | 0.16 | -0.16 | 0.05 | 0.35 | -0.15 | 0.09 | 0.70 | -0.14 | 0.09 | 0.63 | -0.16 | 0.07 | 0.60 |
| Tyzzerella                    | 0.23  | 0.05 | 0.26 | 0.23  | 0.04 | 0.34 | 0.24  | 0.05 | 0.63 | 0.26  | 0.03 | 0.46 | 0.30  | 0.01 | 0.34 |
| UBA1819                       | -0.09 | 0.57 | 0.80 | -0.09 | 0.55 | 0.88 | -0.11 | 0.46 | 0.91 | -0.14 | 0.35 | 0.79 | -0.14 | 0.34 | 0.83 |
| UCG.002                       | 0.06  | 0.36 | 0.64 | 0.03  | 0.70 | 0.91 | -0.06 | 0.37 | 0.85 | -0.07 | 0.31 | 0.79 | -0.08 | 0.27 | 0.83 |
| UCG.003                       | 0.12  | 0.10 | 0.38 | 0.05  | 0.52 | 0.88 | -0.02 | 0.78 | 0.94 | -0.02 | 0.77 | 0.92 | -0.03 | 0.74 | 0.92 |
| UCG.005                       | 0.09  | 0.31 | 0.57 | 0.07  | 0.39 | 0.76 | -0.02 | 0.84 | 0.95 | -0.03 | 0.71 | 0.92 | -0.03 | 0.77 | 0.92 |
| UCG.009                       | 0.18  | 0.17 | 0.47 | 0.08  | 0.53 | 0.88 | 0.01  | 0.95 | 0.98 | -0.02 | 0.89 | 0.95 | -0.01 | 0.92 | 0.97 |
| Veillonella                   | 0.15  | 0.12 | 0.39 | 0.12  | 0.18 | 0.55 | 0.14  | 0.15 | 0.70 | 0.13  | 0.17 | 0.75 | 0.13  | 0.17 | 0.78 |
| Victivallis                   | 0.28  | 0.00 | 0.07 | 0.22  | 0.01 | 0.20 | 0.15  | 0.11 | 0.70 | 0.13  | 0.14 | 0.75 | 0.14  | 0.12 | 0.70 |

Multivariable-adjusted regression models adjusted for:

Model 1: sequencing batch, age, race, gender, study center

Model 2: Model 1, with education

Model 3: Model 2, with physical activity, diet score, medication use, and smoking

Model 4: Model 3 with BMI

Model 5: Model 4 with hypertension and diabetes

eTable 40: Multivariable-adjusted regression coefficients, p-values, sex interaction p-values, false discovery rate (FDR)-adjusted p-values for sex-genera interaction with respect to DSST.

|                               | Model1 |         |           |      |         | Model2 |         |           |      |         | Model3 |         |           |      |         | Model4 |         |           |      |         | Model5 |         |           |      |         |
|-------------------------------|--------|---------|-----------|------|---------|--------|---------|-----------|------|---------|--------|---------|-----------|------|---------|--------|---------|-----------|------|---------|--------|---------|-----------|------|---------|
|                               | beta   | p-value | p-val Int | FDR  | FDR-int | beta   | p-value | p-val Int | FDR  | FDR-int | beta   | p-value | p-val Int | FDR  | FDR-int | beta   | p-value | p-val Int | FDR  | FDR-int | beta   | p-value | p-val Int | FDR  | FDR-int |
| Acetanaerobacterium           | 0.51   | 0.81    | 0.61      | 0.88 | 0.98    | 0.52   | 0.79    | 0.90      | 0.90 | 0.99    | 0.46   | 0.83    | 0.96      | 0.95 | 0.98    | 0.46   | 0.83    | 0.96      | 0.95 | 0.98    | 0.39   | 0.85    | 0.88      | 0.94 | 0.96    |
| Acidaminococcus               | -0.09  | 0.89    | 0.25      | 0.92 | 0.74    | 0.34   | 0.57    | 0.24      | 0.73 | 0.81    | 0.48   | 0.45    | 0.41      | 0.79 | 0.89    | 0.48   | 0.45    | 0.42      | 0.79 | 0.90    | 0.51   | 0.42    | 0.37      | 0.75 | 0.89    |
| Actinomyces                   | -1.54  | 0.38    | 0.40      | 0.57 | 0.91    | -1.42  | 0.39    | 0.28      | 0.63 | 0.81    | -0.78  | 0.66    | 0.24      | 0.92 | 0.80    | -0.83  | 0.64    | 0.23      | 0.90 | 0.79    | -0.70  | 0.69    | 0.21      | 0.94 | 0.78    |
| Adlercreutzia                 | 0.70   | 0.48    | 0.41      | 0.64 | 0.92    | 0.82   | 0.39    | 0.64      | 0.63 | 0.99    | 1.16   | 0.24    | 0.95      | 0.63 | 0.98    | 1.16   | 0.24    | 0.95      | 0.63 | 0.98    | 1.11   | 0.26    | 0.94      | 0.65 | 0.96    |
| Agathobacter                  | 1.00   | 0.49    | 0.59      | 0.64 | 0.98    | 0.46   | 0.74    | 0.85      | 0.86 | 0.99    | -0.12  | 0.93    | 0.83      | 0.95 | 0.98    | -0.12  | 0.93    | 0.83      | 0.95 | 0.98    | -0.13  | 0.93    | 0.88      | 0.96 | 0.96    |
| Akkermansia                   | 2.20   | 0.00    | 0.25      | 0.07 | 0.74    | 1.68   | 0.01    | 0.41      | 0.24 | 0.84    | 1.63   | 0.02    | 0.50      | 0.51 | 0.96    | 1.63   | 0.02    | 0.49      | 0.51 | 0.96    | 1.61   | 0.03    | 0.56      | 0.48 | 0.96    |
| Alistipes                     | 2.82   | 0.02    | 0.06      | 0.12 | 0.74    | 1.97   | 0.10    | 0.15      | 0.31 | 0.81    | 1.61   | 0.20    | 0.19      | 0.63 | 0.78    | 1.61   | 0.20    | 0.19      | 0.63 | 0.78    | 1.51   | 0.23    | 0.21      | 0.65 | 0.78    |
| Allisonella                   | -1.04  | 0.35    | 0.22      | 0.56 | 0.74    | -0.08  | 0.94    | 0.32      | 0.96 | 0.81    | -0.10  | 0.93    | 0.73      | 0.95 | 0.98    | -0.10  | 0.93    | 0.73      | 0.95 | 0.98    | -0.05  | 0.96    | 0.75      | 0.97 | 0.96    |
| Anaerofilum                   | 1.74   | 0.26    | 0.79      | 0.49 | 1.00    | 1.04   | 0.48    | 0.99      | 0.67 | 0.99    | 1.47   | 0.34    | 0.72      | 0.72 | 0.98    | 1.47   | 0.34    | 0.72      | 0.72 | 0.98    | 1.45   | 0.35    | 0.79      | 0.71 | 0.96    |
| Anaerostipes                  | 2.16   | 0.19    | 0.20      | 0.41 | 0.74    | 1.39   | 0.38    | 0.28      | 0.63 | 0.81    | 1.49   | 0.37    | 0.26      | 0.72 | 0.80    | 1.51   | 0.36    | 0.25      | 0.72 | 0.80    | 1.60   | 0.34    | 0.25      | 0.71 | 0.81    |
| Anaerotruncus                 | 1.56   | 0.26    | 0.97      | 0.49 | 1.00    | 0.95   | 0.48    | 0.80      | 0.67 | 0.99    | 0.68   | 0.63    | 0.81      | 0.91 | 0.98    | 0.69   | 0.62    | 0.81      | 0.90 | 0.98    | 0.68   | 0.63    | 0.84      | 0.91 | 0.96    |
| Bacteroides                   | -0.23  | 0.91    | 0.29      | 0.94 | 0.74    | -0.62  | 0.76    | 0.26      | 0.86 | 0.81    | 0.18   | 0.93    | 0.22      | 0.95 | 0.79    | 0.19   | 0.93    | 0.22      | 0.95 | 0.79    | 0.11   | 0.96    | 0.21      | 0.97 | 0.78    |
| Barnesiella                   | 1.74   | 0.01    | 0.46      | 0.08 | 0.94    | 1.81   | 0.00    | 0.35      | 0.24 | 0.84    | 1.32   | 0.04    | 0.66      | 0.51 | 0.98    | 1.32   | 0.04    | 0.66      | 0.51 | 0.98    | 1.34   | 0.04    | 0.75      | 0.48 | 0.96    |
| Bifidobacterium               | -0.92  | 0.26    | 0.12      | 0.49 | 0.74    | -0.38  | 0.63    | 0.11      | 0.77 | 0.81    | -0.48  | 0.54    | 0.16      | 0.84 | 0.78    | -0.48  | 0.54    | 0.16      | 0.85 | 0.78    | -0.44  | 0.57    | 0.16      | 0.86 | 0.78    |
| Bifilophila                   | 0.51   | 0.58    | 0.62      | 0.72 | 0.98    | -0.13  | 0.89    | 0.98      | 0.94 | 0.99    | -0.44  | 0.64    | 0.94      | 0.91 | 0.98    | -0.43  | 0.65    | 0.95      | 0.90 | 0.98    | -0.48  | 0.62    | 0.93      | 0.90 | 0.96    |
| Blautia                       | 7.64   | 0.01    | 0.17      | 0.08 | 0.74    | 5.68   | 0.05    | 0.37      | 0.28 | 0.84    | 6.32   | 0.04    | 0.41      | 0.51 | 0.89    | 6.32   | 0.04    | 0.41      | 0.51 | 0.89    | 6.33   | 0.04    | 0.52      | 0.48 | 0.96    |
| Butyrivibrio                  | 6.08   | 0.01    | 0.08      | 0.08 | 0.74    | 4.31   | 0.05    | 0.12      | 0.28 | 0.81    | 4.57   | 0.04    | 0.07      | 0.51 | 0.78    | 4.58   | 0.04    | 0.07      | 0.51 | 0.78    | 4.67   | 0.04    | 0.08      | 0.48 | 0.78    |
| Butyricimonas                 | 0.49   | 0.52    | 0.91      | 0.66 | 1.00    | 0.14   | 0.84    | 0.95      | 0.93 | 0.99    | 0.22   | 0.77    | 0.91      | 0.95 | 0.98    | 0.22   | 0.77    | 0.91      | 0.95 | 0.98    | 0.19   | 0.80    | 0.91      | 0.94 | 0.96    |
| CAG_56                        | 0.75   | 0.37    | 0.95      | 0.57 | 1.00    | 0.31   | 0.69    | 0.88      | 0.82 | 0.99    | -0.17  | 0.83    | 0.91      | 0.95 | 0.98    | -0.17  | 0.83    | 0.91      | 0.95 | 0.98    | -0.22  | 0.79    | 0.80      | 0.94 | 0.96    |
| Candidatus_Soleaferrea        | 1.35   | 0.42    | 0.99      | 0.61 | 1.00    | 0.49   | 0.76    | 0.72      | 0.86 | 0.99    | 0.20   | 0.90    | 0.57      | 0.95 | 0.98    | 0.20   | 0.90    | 0.57      | 0.95 | 0.98    | 0.19   | 0.91    | 0.63      | 0.96 | 0.96    |
| Caproiciproducens             | 0.51   | 0.74    | 0.94      | 0.84 | 1.00    | 0.27   | 0.85    | 0.75      | 0.93 | 0.99    | 0.22   | 0.89    | 0.86      | 0.95 | 0.98    | 0.22   | 0.89    | 0.86      | 0.95 | 0.98    | 0.28   | 0.86    | 0.82      | 0.94 | 0.96    |
| Christensenellaceae_R.7_group | 1.69   | 0.02    | 0.82      | 0.11 | 1.00    | 1.35   | 0.05    | 0.75      | 0.28 | 0.99    | 1.16   | 0.11    | 0.49      | 0.58 | 0.96    | 1.16   | 0.11    | 0.49      | 0.58 | 0.96    | 1.15   | 0.12    | 0.59      | 0.60 | 0.96    |
| Clostridium_sensu_stricto_1   | 0.99   | 0.25    | 0.19      | 0.49 | 0.74    | 1.31   | 0.11    | 0.09      | 0.34 | 0.81    | 0.93   | 0.28    | 0.14      | 0.63 | 0.78    | 0.93   | 0.28    | 0.14      | 0.63 | 0.78    | 1.02   | 0.24    | 0.11      | 0.65 | 0.78    |
| Colidextribacter              | -1.24  | 0.47    | 0.68      | 0.64 | 0.98    | -2.20  | 0.18    | 0.96      | 0.46 | 0.99    | -1.22  | 0.47    | 0.81      | 0.81 | 0.98    | -1.22  | 0.47    | 0.80      | 0.81 | 0.98    | -1.14  | 0.50    | 0.83      | 0.83 | 0.96    |
| Collinsella                   | -0.76  | 0.38    | 0.66      | 0.57 | 0.98    | -0.44  | 0.59    | 0.99      | 0.75 | 0.99    | -0.74  | 0.39    | 0.56      | 0.74 | 0.98    | -0.74  | 0.39    | 0.56      | 0.74 | 0.98    | -0.74  | 0.39    | 0.51      | 0.73 | 0.96    |
| Coprobacter                   | 0.82   | 0.34    | 0.21      | 0.56 | 0.74    | 0.56   | 0.49    | 0.16      | 0.68 | 0.81    | 0.02   | 0.98    | 0.29      | 0.98 | 0.80    | 0.02   | 0.98    | 0.29      | 0.98 | 0.80    | -0.04  | 0.97    | 0.35      | 0.97 | 0.87    |
| Coprococcus                   | 2.42   | 0.02    | 0.16      | 0.11 | 0.74    | 1.65   | 0.10    | 0.58      | 0.31 | 0.97    | 1.42   | 0.16    | 0.69      | 0.63 | 0.98    | 1.42   | 0.16    | 0.69      | 0.63 | 0.98    | 1.41   | 0.17    | 0.74      | 0.65 | 0.96    |
| Defluviitaleaceae_UCG.011     | 2.99   | 0.04    | 0.72      | 0.15 | 0.99    | 3.03   | 0.03    | 0.43      | 0.24 | 0.84    | 3.27   | 0.02    | 0.13      | 0.51 | 0.78    | 3.27   | 0.02    | 0.14      | 0.51 | 0.78    | 3.25   | 0.02    | 0.13      | 0.48 | 0.78    |
| Desulfobivrio                 | 0.23   | 0.76    | 0.88      | 0.85 | 1.00    | 0.29   | 0.68    | 0.86      | 0.82 | 0.99    | 0.28   | 0.71    | 0.85      | 0.95 | 0.98    | 0.29   | 0.71    | 0.85      | 0.95 | 0.98    | 0.27   | 0.73    | 0.80      | 0.94 | 0.96    |
| Dialister                     | 0.04   | 0.95    | 0.92      | 0.97 | 1.00    | 0.10   | 0.87    | 0.96      | 0.93 | 0.99    | 0.41   | 0.51    | 0.81      | 0.82 | 0.98    | 0.41   | 0.51    | 0.81      | 0.82 | 0.98    | 0.47   | 0.46    | 0.75      | 0.80 | 0.96    |
| DNF0809                       | 2.24   | 0.16    | 0.67      | 0.36 | 0.98    | 1.89   | 0.21    | 0.71      | 0.51 | 0.99    | 1.86   | 0.24    | 0.66      | 0.63 | 0.98    | 1.87   | 0.24    | 0.66      | 0.63 | 0.98    | 1.89   | 0.24    | 0.65      | 0.65 | 0.96    |
| Dorea                         | 1.75   | 0.18    | 0.09      | 0.40 | 0.74    | 1.38   | 0.27    | 0.22      | 0.58 | 0.81    | 1.75   | 0.17    | 0.14      | 0.63 | 0.78    | 1.75   | 0.17    | 0.14      | 0.63 | 0.78    | 1.71   | 0.18    | 0.14      | 0.65 | 0.78    |
| DTU089                        | 1.90   | 0.13    | 0.26      | 0.33 | 0.74    | 1.82   | 0.13    | 0.19      | 0.39 | 0.81    | 1.35   | 0.28    | 0.32      | 0.63 | 0.80    | 1.35   | 0.28    | 0.32      | 0.63 | 0.80    | 1.35   | 0.29    | 0.33      | 0.65 | 0.87    |
| Eggerthella                   | -0.76  | 0.53    | 0.24      | 0.66 | 0.74    | -1.19  | 0.30    | 0.13      | 0.58 | 0.81    | -0.70  | 0.57    | 0.16      | 0.86 | 0.78    | -0.70  | 0.57    | 0.16      | 0.86 | 0.78    | -0.69  | 0.57    | 0.14      | 0.86 | 0.78    |
| Eisenbergiella                | -1.95  | 0.11    | 0.03      | 0.31 | 0.74    | -1.99  | 0.09    | 0.02      | 0.31 | 0.74    | -1.61  | 0.19    | 0.04      | 0.63 | 0.68    | -1.60  | 0.20    | 0.04      | 0.63 | 0.68    | -1.54  | 0.22    | 0.03      | 0.65 | 0.73    |
| Erysipelatoclostridium        | -1.22  | 0.32    | 0.22      | 0.54 | 0.74    | -1.07  | 0.36    | 0.24      | 0.63 | 0.81    | -0.39  | 0.75    | 0.30      | 0.95 | 0.80    | -0.39  | 0.75    | 0.30      | 0.95 | 0.80    | -0.32  | 0.79    | 0.32      | 0.94 | 0.87    |
| Erysipelotrichaceae_UCG.003   | 0.93   | 0.32    | 0.67      | 0.54 | 0.98    | 0.76   | 0.39    | 0.72      | 0.63 | 0.99    | 0.53   | 0.57    | 0.46      | 0.86 | 0.95    | 0.53   | 0.57    | 0.46      | 0.86 | 0.94    | 0.53   | 0.57    | 0.48      | 0.86 | 0.96    |
| Escherichia_Shigella          | -1.42  | 0.10    | 0.02      | 0.29 | 0.74    | -0.88  | 0.28    | 0.03      | 0.58 | 0.74    | -1.09  | 0.21    | 0.01      | 0.63 | 0.53    | -1.09  | 0.21    | 0.01      | 0.63 | 0.53    | -1.11  | 0.20    | 0.01      | 0.65 | 0.56    |
| Faecalibacterium              | 2.47   | 0.09    | 0.56      | 0.27 | 0.98    | 2.52   | 0.07    | 0.32      | 0.31 | 0.81    | 2.83   | 0.06    | 0.12      | 0.51 | 0.78    | 2.83   | 0.06    | 0.12      | 0.51 | 0.78    | 2.92   | 0.05    | 0.12      | 0.48 | 0.78    |
| Family_XIII_AD3011_group      | 3.57   | 0.00    | 0.16      | 0.07 | 0.74    | 2.48   | 0.03    | 0.34      | 0.24 | 0.84    | 2.22   | 0.07    | 0.27      | 0.51 | 0.80    | 2.24   | 0.07    | 0.27      | 0.51 | 0.80    | 2.22   | 0.07    | 0.31      | 0.55 | 0.87    |
| Family_XIII_UCG.001           | 2.98   | 0.03    | 0.16      | 0.13 | 0.74    | 2.47   | 0.06    | 0.16      | 0.30 | 0.81    | 1.88   | 0.17    | 0.16      | 0.63 | 0.78    | 1.89   | 0.17    | 0.16      | 0.63 | 0.78    | 1.86   | 0.18    | 0.18      | 0.65 | 0.78    |
| FD2005                        | 0.43   | 0.73    | 0.91      | 0.84 | 1.00    | 0.73   | 0.54    | 0.93      | 0.72 | 0.99    | 0.62   | 0.62    | 0.92      | 0.91 | 0.98    | 0.62   | 0.61    | 0.92      | 0.90 | 0.98    | 0.62   | 0.62    | 0.93      | 0.90 | 0.96    |
| Flavonifractor                | -1.14  | 0.29    | 0.77      | 0.52 | 1.00    | -1.11  | 0.28    | 0.74      | 0.58 | 0.99    | -0.30  | 0.78    | 0.88      | 0.95 | 0.98    | -0.30  | 0.78    | 0.88      | 0.95 | 0.98    | -0.24  | 0.83    | 0.95      | 0.94 | 0.96    |
| Fournierella                  | 1.23   | 0.30    | 0.97      | 0.52 | 1.00    | 1.18   | 0.30    | 0.89      | 0.58 | 0.99    | 0.28   | 0.81    | 0.97      | 0.95 | 0.98    | 0.28   | 0.81    | 0.97      | 0.95 | 0.98    | 0.27   | 0.82    | 0.89      | 0.94 | 0.96    |
| Frisingicoccus                | -1.77  | 0.10    | 0.28      | 0.29 | 0.74    | -1.49  | 0.15    | 0.61      | 0.41 | 0.99    | -1.30  | 0.22    | 0.74      | 0.63 | 0.98    | -1.30  | 0.23    | 0.75      | 0.63 | 0.98    | -1.33  | 0.22    | 0.68      | 0.65 | 0.96    |
| Fusicatenibacter              | 0.78   | 0.48    | 0.58      | 0.64 | 0.98    | 0.81   | 0.56    | 0.45      | 0.73 | 0.84    | 0.14   | 0.90    | 0.66      | 0.95 | 0.98    | 0.14   | 0.90    | 0.66      | 0.95 | 0.98    | 0.12   | 0.91    | 0.73      | 0.96 | 0.96    |
| Fusobacterium                 | -1.94  | 0.09    | 0.07      | 0.27 | 0.74    | -1.51  | 0.16    | 0.05      | 0.42 | 0.74    | -1.04  | 0.36    | 0.02      | 0.72 | 0.55    | -1.04  | 0.36    | 0.02      | 0.72 | 0.55    | -1.11  | 0.33    | 0.02      | 0.70 | 0.64    |
| GCA_900066575                 | 1.60   | 0.21    | 0.45      | 0.43 | 0.94    | 0.93   | 0.44    | 0.40      | 0.67 | 0.84    | 0.36   | 0.77    | 0.29      | 0.95 | 0.80    | 0.35   | 0.78    | 0.28      | 0.95 | 0.80    | 0.36   | 0.77    | 0.25      | 0.94 | 0.81    |
| Gordonibacter                 | -0.52  | 0.71    | 0.51      | 0.83 | 0.95    | -1.02  | 0.45    | 0.42      | 0.67 | 0.84    | -0.13  | 0.93    | 0.83      | 0.95 | 0.98    | -0.14  | 0.92    | 0.83      | 0.95 | 0.98    | -0.18  | 0.90    | 0.84      | 0.96 | 0.96    |
| Granulicatella                | -2.97  | 0.10    | 0.10      | 0.29 | 0.74    | -2.49  | 0.15    | 0.15      | 0.41 | 0.81    | -1.73  | 0.35    | 0.36      | 0.72 | 0.84    | -1.75  | 0.35    | 0.36      | 0.72 | 0.84    | -1.68  | 0.37    | 0.35      | 0.72 | 0.87    |

|                       |       |      |      |      |      |       |      |      |      |      |       |      |      |      |      |       |      |      |      |      |       |      |      |      |      |
|-----------------------|-------|------|------|------|------|-------|------|------|------|------|-------|------|------|------|------|-------|------|------|------|------|-------|------|------|------|------|
| Monoglobus            | 2.25  | 0.04 | 1.00 | 0.15 | 1.00 | 1.82  | 0.08 | 0.94 | 0.31 | 0.99 | 1.26  | 0.26 | 0.96 | 0.63 | 0.98 | 1.26  | 0.27 | 0.96 | 0.63 | 0.98 | 1.19  | 0.29 | 0.87 | 0.66 | 0.96 |
| Moryella              | 3.66  | 0.02 | 0.25 | 0.10 | 0.74 | 3.12  | 0.03 | 0.18 | 0.24 | 0.81 | 2.20  | 0.14 | 0.20 | 0.63 | 0.78 | 2.20  | 0.15 | 0.20 | 0.63 | 0.78 | 2.19  | 0.15 | 0.22 | 0.65 | 0.78 |
| Negativibacillus      | -0.33 | 0.75 | 0.70 | 0.85 | 0.99 | -0.66 | 0.51 | 0.87 | 0.69 | 0.99 | -0.88 | 0.40 | 0.67 | 0.74 | 0.98 | -0.88 | 0.40 | 0.67 | 0.74 | 0.98 | -0.92 | 0.38 | 0.66 | 0.72 | 0.96 |
| NK4A214_group         | 1.24  | 0.12 | 0.48 | 0.31 | 0.94 | 0.72  | 0.35 | 0.66 | 0.63 | 0.99 | 0.18  | 0.82 | 0.82 | 0.95 | 0.98 | 0.18  | 0.82 | 0.82 | 0.95 | 0.98 | 0.18  | 0.83 | 0.94 | 0.94 | 0.96 |
| Odoribacter           | 0.61  | 0.44 | 0.64 | 0.62 | 0.98 | 0.55  | 0.47 | 0.46 | 0.67 | 0.85 | 0.22  | 0.78 | 0.50 | 0.95 | 0.96 | 0.22  | 0.78 | 0.50 | 0.95 | 0.96 | 0.16  | 0.84 | 0.54 | 0.94 | 0.96 |
| Oscilibacter          | 2.46  | 0.06 | 0.61 | 0.19 | 0.98 | 2.13  | 0.08 | 0.57 | 0.31 | 0.97 | 2.14  | 0.10 | 0.50 | 0.53 | 0.96 | 2.15  | 0.10 | 0.50 | 0.53 | 0.96 | 2.18  | 0.10 | 0.51 | 0.55 | 0.96 |
| Oscillospira          | 1.69  | 0.36 | 0.29 | 0.56 | 0.74 | 1.38  | 0.43 | 0.41 | 0.66 | 0.84 | 2.41  | 0.18 | 0.27 | 0.63 | 0.80 | 2.41  | 0.18 | 0.27 | 0.63 | 0.80 | 2.42  | 0.18 | 0.30 | 0.65 | 0.87 |
| Oxalobacter           | 3.41  | 0.01 | 0.26 | 0.08 | 0.74 | 2.54  | 0.04 | 0.21 | 0.26 | 0.81 | 2.21  | 0.09 | 0.26 | 0.51 | 0.80 | 2.21  | 0.09 | 0.26 | 0.51 | 0.80 | 2.09  | 0.11 | 0.32 | 0.58 | 0.87 |
| Paludicola            | 3.61  | 0.01 | 0.12 | 0.07 | 0.74 | 2.31  | 0.07 | 0.30 | 0.31 | 0.81 | 1.89  | 0.15 | 0.22 | 0.63 | 0.79 | 1.89  | 0.16 | 0.22 | 0.63 | 0.79 | 1.92  | 0.15 | 0.27 | 0.65 | 0.85 |
| Parabacteroides       | 0.50  | 0.60 | 0.19 | 0.72 | 0.74 | 0.94  | 0.29 | 0.14 | 0.58 | 0.81 | 1.00  | 0.27 | 0.18 | 0.63 | 0.78 | 1.02  | 0.27 | 0.17 | 0.63 | 0.78 | 0.99  | 0.28 | 0.19 | 0.65 | 0.78 |
| Paraprevotella        | 0.31  | 0.62 | 0.04 | 0.74 | 0.74 | 0.52  | 0.39 | 0.03 | 0.63 | 0.74 | 0.59  | 0.36 | 0.04 | 0.72 | 0.68 | 0.59  | 0.37 | 0.05 | 0.72 | 0.68 | 0.65  | 0.33 | 0.04 | 0.70 | 0.73 |
| Parasutterella        | 1.03  | 0.15 | 0.67 | 0.35 | 0.98 | 1.02  | 0.14 | 0.49 | 0.39 | 0.88 | 0.49  | 0.50 | 0.84 | 0.82 | 0.98 | 0.49  | 0.50 | 0.84 | 0.82 | 0.98 | 0.43  | 0.55 | 0.85 | 0.86 | 0.96 |
| Peptococcus           | 2.44  | 0.05 | 0.27 | 0.18 | 0.74 | 1.71  | 0.15 | 0.30 | 0.41 | 0.81 | 1.44  | 0.25 | 0.33 | 0.63 | 0.80 | 1.44  | 0.25 | 0.33 | 0.63 | 0.80 | 1.44  | 0.25 | 0.39 | 0.65 | 0.89 |
| Phascolarctobacterium | -0.03 | 0.96 | 0.92 | 0.97 | 1.00 | -0.06 | 0.92 | 0.76 | 0.95 | 0.99 | -0.07 | 0.91 | 0.84 | 0.95 | 0.98 | -0.07 | 0.91 | 0.84 | 0.95 | 0.98 | -0.10 | 0.88 | 0.84 | 0.96 | 0.96 |
| Phocaea               | 0.46  | 0.77 | 0.91 | 0.85 | 1.00 | -0.30 | 0.85 | 0.77 | 0.93 | 0.99 | -0.54 | 0.73 | 0.45 | 0.95 | 0.95 | -0.54 | 0.73 | 0.45 | 0.95 | 0.94 | -0.53 | 0.74 | 0.45 | 0.94 | 0.96 |
| Prevotella            | -0.71 | 0.19 | 0.77 | 0.41 | 1.00 | -0.56 | 0.28 | 0.93 | 0.58 | 0.99 | -0.62 | 0.26 | 0.83 | 0.63 | 0.98 | -0.62 | 0.26 | 0.83 | 0.63 | 0.98 | -0.60 | 0.27 | 0.83 | 0.65 | 0.96 |
| Romboutsia            | 0.83  | 0.42 | 0.33 | 0.61 | 0.83 | 1.22  | 0.21 | 0.23 | 0.51 | 0.81 | 1.17  | 0.25 | 0.19 | 0.63 | 0.78 | 1.17  | 0.25 | 0.19 | 0.63 | 0.78 | 1.26  | 0.22 | 0.19 | 0.65 | 0.78 |
| Roseburia             | 3.80  | 0.00 | 0.04 | 0.07 | 0.74 | 3.00  | 0.02 | 0.11 | 0.24 | 0.81 | 2.30  | 0.10 | 0.16 | 0.53 | 0.78 | 2.30  | 0.10 | 0.16 | 0.53 | 0.78 | 2.31  | 0.10 | 0.17 | 0.55 | 0.78 |
| Ruminococcus          | 1.26  | 0.12 | 0.85 | 0.31 | 1.00 | 0.95  | 0.22 | 0.95 | 0.51 | 0.99 | 0.47  | 0.57 | 1.00 | 0.86 | 1.00 | 0.47  | 0.57 | 1.00 | 0.86 | 1.00 | 0.49  | 0.55 | 0.90 | 0.86 | 0.96 |
| Sellimonas            | 0.72  | 0.52 | 0.79 | 0.66 | 1.00 | 0.91  | 0.39 | 0.73 | 0.63 | 0.99 | 0.76  | 0.49 | 0.78 | 0.82 | 0.98 | 0.76  | 0.49 | 0.78 | 0.82 | 0.98 | 0.75  | 0.50 | 0.80 | 0.83 | 0.96 |
| Senegalimassilia      | 0.73  | 0.47 | 0.60 | 0.64 | 0.98 | 0.70  | 0.47 | 0.65 | 0.67 | 0.99 | -0.19 | 0.85 | 0.97 | 0.95 | 0.98 | -0.20 | 0.85 | 0.97 | 0.95 | 0.98 | -0.19 | 0.85 | 0.93 | 0.84 | 0.96 |
| Shuttleworthia        | 2.90  | 0.03 | 0.11 | 0.13 | 0.74 | 2.29  | 0.07 | 0.04 | 0.31 | 0.74 | 2.28  | 0.09 | 0.03 | 0.51 | 0.68 | 2.30  | 0.08 | 0.03 | 0.51 | 0.68 | 2.28  | 0.09 | 0.04 | 0.55 | 0.73 |
| Slackia               | -0.34 | 0.71 | 0.55 | 0.83 | 0.98 | -0.03 | 0.98 | 0.40 | 0.98 | 0.84 | -0.41 | 0.65 | 0.63 | 0.91 | 0.98 | -0.41 | 0.65 | 0.63 | 0.90 | 0.98 | -0.43 | 0.64 | 0.57 | 0.91 | 0.96 |
| Streptococcus         | 1.23  | 0.87 | 0.48 | 0.92 | 0.94 | 1.17  | 0.90 | 0.45 | 0.94 | 0.84 | 0.47  | 0.74 | 0.84 | 0.95 | 0.98 | 0.46  | 0.75 | 0.84 | 0.95 | 0.98 | 0.60  | 0.68 | 0.81 | 0.94 | 0.96 |
| Subdoligranulum       | 1.27  | 0.24 | 0.82 | 0.48 | 1.00 | 0.93  | 0.37 | 0.84 | 0.63 | 0.99 | 0.88  | 0.40 | 0.69 | 0.74 | 0.98 | 0.88  | 0.40 | 0.69 | 0.74 | 0.98 | 0.87  | 0.41 | 0.71 | 0.75 | 0.96 |
| Sutterella            | -1.27 | 0.04 | 0.67 | 0.15 | 0.98 | -0.98 | 0.10 | 0.55 | 0.31 | 0.97 | -0.87 | 0.16 | 0.72 | 0.63 | 0.98 | -0.87 | 0.16 | 0.72 | 0.63 | 0.98 | -0.85 | 0.17 | 0.75 | 0.65 | 0.96 |
| TM7x                  | -1.06 | 0.47 | 0.18 | 0.64 | 0.74 | -1.54 | 0.27 | 0.18 | 0.58 | 0.81 | -1.10 | 0.45 | 0.33 | 0.79 | 0.80 | -1.10 | 0.45 | 0.33 | 0.79 | 0.80 | -1.08 | 0.46 | 0.25 | 0.80 | 0.81 |
| Turicibacter          | -0.20 | 0.88 | 0.92 | 0.92 | 1.00 | 0.63  | 0.62 | 0.80 | 0.77 | 0.99 | 0.41  | 0.75 | 0.93 | 0.95 | 0.98 | 0.42  | 0.75 | 0.93 | 0.95 | 0.98 | 0.46  | 0.72 | 0.79 | 0.94 | 0.96 |
| Tuzzerella            | -1.19 | 0.24 | 0.81 | 0.48 | 1.00 | -1.17 | 0.23 | 0.99 | 0.52 | 0.99 | -0.82 | 0.42 | 0.93 | 0.77 | 0.98 | -0.82 | 0.43 | 0.92 | 0.77 | 0.98 | -0.81 | 0.43 | 0.86 | 0.78 | 0.96 |
| UBA1819               | -1.01 | 0.50 | 0.35 | 0.66 | 0.84 | -1.48 | 0.30 | 0.20 | 0.58 | 0.81 | -1.07 | 0.47 | 0.18 | 0.81 | 0.78 | -1.07 | 0.48 | 0.18 | 0.81 | 0.78 | -1.09 | 0.47 | 0.20 | 0.80 | 0.78 |
| UCG_002               | 0.62  | 0.44 | 0.72 | 0.62 | 0.99 | 0.09  | 0.91 | 0.57 | 0.94 | 0.97 | -0.13 | 0.87 | 0.76 | 0.95 | 0.98 | -0.13 | 0.87 | 0.76 | 0.95 | 0.98 | -0.18 | 0.82 | 0.70 | 0.94 | 0.96 |
| UCG_003               | 1.13  | 0.17 | 0.85 | 0.38 | 1.00 | 0.56  | 0.48 | 0.95 | 0.67 | 0.99 | 0.39  | 0.64 | 0.71 | 0.91 | 0.98 | 0.39  | 0.64 | 0.71 | 0.90 | 0.98 | 0.37  | 0.65 | 0.75 | 0.92 | 0.96 |
| UCG_005               | 1.91  | 0.04 | 0.46 | 0.15 | 0.94 | 1.55  | 0.08 | 0.38 | 0.31 | 0.84 | 0.87  | 0.35 | 0.37 | 0.72 | 0.84 | 0.87  | 0.36 | 0.37 | 0.72 | 0.84 | 0.88  | 0.35 | 0.41 | 0.71 | 0.92 |
| UCG_009               | 3.28  | 0.02 | 0.09 | 0.10 | 0.74 | 2.69  | 0.04 | 0.04 | 0.26 | 0.74 | 1.74  | 0.20 | 0.09 | 0.63 | 0.78 | 1.73  | 0.20 | 0.09 | 0.63 | 0.78 | 1.78  | 0.19 | 0.10 | 0.65 | 0.78 |
| Veillonella           | 1.00  | 0.28 | 0.99 | 0.51 | 1.00 | 1.12  | 0.21 | 0.82 | 0.51 | 0.99 | 1.03  | 0.27 | 0.71 | 0.63 | 0.98 | 1.03  | 0.27 | 0.71 | 0.63 | 0.98 | 1.10  | 0.24 | 0.74 | 0.65 | 0.96 |
| Victivallis           | 2.59  | 0.00 | 0.28 | 0.07 | 0.74 | 2.24  | 0.01 | 0.21 | 0.24 | 0.81 | 1.56  | 0.08 | 0.53 | 0.51 | 0.98 | 1.56  | 0.08 | 0.53 | 0.51 | 0.98 | 1.57  | 0.08 | 0.61 | 0.55 | 0.96 |

Multivariable-adjusted regression models adjusted for:

Model 1: sequencing batch, age, race, gender, study center

Model 2: Model 1, with education

Model 3: Model 2, with physical activity, diet score, medication use, and smoking

Model 4: Model 3 with BMI

Model 5: Model 4 with hypertension and diabetes

eTable 41: Multivariable-adjusted regression coefficients, p-values, sex interaction p-values, false discovery rate (FDR)-adjusted p-values sex-genera interaction with respect to Stroop.

|                               | Model1 |         |           |      |         | Model2 |         |           |      |         | Model3 |         |           |      |         | Model4 |         |           |      |         | Model5 |         |           |      |         |
|-------------------------------|--------|---------|-----------|------|---------|--------|---------|-----------|------|---------|--------|---------|-----------|------|---------|--------|---------|-----------|------|---------|--------|---------|-----------|------|---------|
|                               | beta   | p-value | p-val Int | FDR  | FDR-int | beta   | p-value | p-val Int | FDR  | FDR-int | beta   | p-value | p-val Int | FDR  | FDR-int | beta   | p-value | p-val Int | FDR  | FDR-int | beta   | p-value | p-val Int | FDR  | FDR-int |
| Acetanaerobacterium           | 0.02   | 0.99    | 0.99      | 1.00 | 0.99    | 0.01   | 1.00    | 0.88      | 1.00 | 0.99    | 1.11   | 0.48    | 0.45      | 0.88 | 0.80    | 1.12   | 0.48    | 0.46      | 0.88 | 0.79    | 1.11   | 0.48    | 0.46      | 0.88 | 0.79    |
| Acidaminococcus               | 0.36   | 0.42    | 0.87      | 0.69 | 0.98    | 0.21   | 0.63    | 0.89      | 0.84 | 0.99    | -0.24  | 0.61    | 0.60      | 0.90 | 0.80    | -0.24  | 0.61    | 0.60      | 0.91 | 0.79    | -0.24  | 0.61    | 0.61      | 0.91 | 0.82    |
| Actionomyces                  | 0.07   | 0.95    | 0.75      | 0.99 | 0.96    | 0.03   | 0.98    | 0.68      | 0.99 | 0.87    | -0.75  | 0.56    | 0.71      | 0.90 | 0.81    | -0.69  | 0.60    | 0.67      | 0.91 | 0.79    | -0.72  | 0.59    | 0.70      | 0.91 | 0.83    |
| Adlercreutzia                 | 1.82   | 0.01    | 0.00      | 0.25 | 0.11    | 1.77   | 0.01    | 0.00      | 0.25 | 0.11    | 1.78   | 0.02    | 0.00      | 0.26 | 0.08    | 1.78   | 0.02    | 0.00      | 0.25 | 0.08    | 1.77   | 0.02    | 0.00      | 0.25 | 0.07    |
| Agathobacter                  | -1.57  | 0.14    | 0.17      | 0.48 | 0.62    | -1.38  | 0.19    | 0.23      | 0.56 | 0.62    | -0.63  | 0.54    | 0.30      | 0.90 | 0.70    | -0.67  | 0.53    | 0.29      | 0.88 | 0.71    | -0.63  | 0.55    | 0.33      | 0.91 | 0.75    |
| Akkermansia                   | 0.26   | 0.62    | 0.08      | 0.83 | 0.50    | 0.44   | 0.40    | 0.05      | 0.68 | 0.39    | 0.80   | 0.13    | 0.01      | 0.76 | 0.12    | 0.80   | 0.14    | 0.01      | 0.73 | 0.13    | 0.79   | 0.14    | 0.01      | 0.78 | 0.14    |
| Alistipes                     | 0.23   | 0.80    | 0.42      | 0.88 | 0.74    | 0.53   | 0.56    | 0.29      | 0.81 | 0.64    | 1.01   | 0.27    | 0.19      | 0.88 | 0.57    | 1.00   | 0.28    | 0.20      | 0.88 | 0.59    | 0.99   | 0.29    | 0.21      | 0.88 | 0.56    |
| Allisonella                   | 0.25   | 0.76    | 0.13      | 0.87 | 0.61    | -0.06  | 0.94    | 0.16      | 0.99 | 0.59    | -0.02  | 0.98    | 0.30      | 0.99 | 0.70    | -0.02  | 0.98    | 0.31      | 0.99 | 0.72    | -0.02  | 0.98    | 0.27      | 0.99 | 0.68    |
| Anaerofilum                   | 2.61   | 0.02    | 0.00      | 0.25 | 0.12    | 2.87   | 0.01    | 0.00      | 0.25 | 0.11    | 3.14   | 0.01    | 0.00      | 0.24 | 0.08    | 3.14   | 0.01    | 0.00      | 0.24 | 0.08    | 3.14   | 0.01    | 0.00      | 0.25 | 0.07    |
| Anaerostipes                  | -0.07  | 0.95    | 0.91      | 0.99 | 0.98    | 0.23   | 0.85    | 0.99      | 0.94 | 0.99    | 0.13   | 0.92    | 0.73      | 0.99 | 0.81    | 0.10   | 0.94    | 0.71      | 0.99 | 0.79    | 0.15   | 0.91    | 0.79      | 0.99 | 0.88    |
| Anaerotruncus                 | 1.35   | 0.18    | 0.04      | 0.54 | 0.43    | 1.57   | 0.12    | 0.03      | 0.49 | 0.33    | 2.66   | 0.01    | 0.00      | 0.25 | 0.08    | 2.69   | 0.01    | 0.00      | 0.24 | 0.08    | 2.63   | 0.01    | 0.00      | 0.25 | 0.07    |
| Bacteroides                   | 1.01   | 0.52    | 0.05      | 0.78 | 0.43    | 1.13   | 0.47    | 0.05      | 0.71 | 0.39    | 1.11   | 0.47    | 0.08      | 0.88 | 0.41    | 1.07   | 0.49    | 0.08      | 0.88 | 0.41    | 1.07   | 0.49    | 0.10      | 0.91 | 0.46    |
| Barnesiella                   | -0.43  | 0.36    | 0.57      | 0.66 | 0.83    | -0.46  | 0.33    | 0.61      | 0.68 | 0.82    | -0.35  | 0.47    | 0.50      | 0.88 | 0.80    | -0.35  | 0.47    | 0.50      | 0.88 | 0.79    | -0.34  | 0.48    | 0.44      | 0.91 | 0.77    |
| Bifidobacterium               | -0.35  | 0.56    | 0.90      | 0.78 | 0.98    | -0.55  | 0.36    | 0.87      | 0.68 | 0.99    | -0.62  | 0.29    | 0.62      | 0.88 | 0.81    | -0.64  | 0.28    | 0.62      | 0.88 | 0.79    | -0.62  | 0.30    | 0.64      | 0.88 | 0.82    |
| Bifilophila                   | -0.24  | 0.72    | 0.69      | 0.87 | 0.91    | -0.02  | 0.98    | 0.51      | 0.99 | 0.80    | 0.27   | 0.70    | 0.33      | 0.90 | 0.75    | 0.26   | 0.72    | 0.34      | 0.91 | 0.78    | 0.26   | 0.72    | 0.36      | 0.92 | 0.77    |
| Blautia                       | 0.23   | 0.92    | 0.48      | 0.97 | 0.76    | 0.93   | 0.67    | 0.33      | 0.86 | 0.66    | 1.27   | 0.57    | 0.23      | 0.90 | 0.61    | 1.26   | 0.57    | 0.23      | 0.91 | 0.62    | 1.28   | 0.57    | 0.15      | 0.91 | 0.56    |
| Butyrivibrio                  | -0.96  | 0.56    | 0.88      | 0.78 | 0.98    | -0.36  | 0.83    | 0.96      | 0.94 | 0.99    | 1.06   | 0.53    | 0.71      | 0.88 | 0.81    | 1.04   | 0.53    | 0.71      | 0.88 | 0.79    | 0.98   | 0.56    | 0.74      | 0.91 | 0.83    |
| Butyrivibrio                  | 0.23   | 0.68    | 0.03      | 0.85 | 0.42    | 0.35   | 0.53    | 0.02      | 0.77 | 0.30    | 0.20   | 0.72    | 0.12      | 0.91 | 0.53    | 0.20   | 0.71    | 0.12      | 0.91 | 0.52    | 0.20   | 0.72    | 0.12      | 0.92 | 0.50    |
| CAG_56                        | -0.63  | 0.30    | 0.96      | 0.60 | 0.98    | -0.48  | 0.43    | 0.97      | 0.70 | 0.99    | 0.21   | 0.74    | 0.50      | 0.92 | 0.80    | 0.21   | 0.74    | 0.50      | 0.92 | 0.79    | 0.19   | 0.76    | 0.47      | 0.92 | 0.77    |
| Candidatus_Soleaferrea        | 1.29   | 0.29    | 0.26      | 0.60 | 0.64    | 1.61   | 0.18    | 0.18      | 0.56 | 0.59    | 1.25   | 0.30    | 0.17      | 0.88 | 0.57    | 1.24   | 0.31    | 0.17      | 0.88 | 0.57    | 1.24   | 0.31    | 0.14      | 0.88 | 0.55    |
| Caproiciproducens             | -0.29  | 0.80    | 0.58      | 0.88 | 0.83    | -0.22  | 0.84    | 0.52      | 0.94 | 0.81    | 0.76   | 0.50    | 0.18      | 0.88 | 0.57    | 0.76   | 0.50    | 0.19      | 0.88 | 0.57    | 0.69   | 0.54    | 0.19      | 0.91 | 0.56    |
| Christensenellaceae_R.7_group | -1.21  | 0.02    | 0.89      | 0.25 | 0.98    | -1.09  | 0.04    | 0.87      | 0.36 | 0.99    | -0.59  | 0.27    | 0.71      | 0.88 | 0.81    | -0.59  | 0.27    | 0.71      | 0.88 | 0.79    | -0.61  | 0.26    | 0.65      | 0.88 | 0.82    |
| Clostridium_sensu_stricto_1   | -0.21  | 0.74    | 0.34      | 0.87 | 0.70    | -0.33  | 0.59    | 0.27      | 0.83 | 0.64    | -0.13  | 0.84    | 0.44      | 0.95 | 0.80    | -0.13  | 0.84    | 0.43      | 0.95 | 0.79    | -0.12  | 0.85    | 0.44      | 0.96 | 0.77    |
| Collidextribacter             | 1.04   | 0.41    | 0.26      | 0.69 | 0.64    | 1.37   | 0.28    | 0.20      | 0.64 | 0.60    | 0.94   | 0.45    | 0.23      | 0.88 | 0.61    | 0.94   | 0.46    | 0.23      | 0.88 | 0.62    | 0.90   | 0.48    | 0.17      | 0.91 | 0.56    |
| Collinsella                   | -0.70  | 0.27    | 0.13      | 0.60 | 0.61    | -0.81  | 0.19    | 0.19      | 0.56 | 0.59    | -0.53  | 0.41    | 0.35      | 0.88 | 0.77    | -0.53  | 0.41    | 0.36      | 0.88 | 0.79    | -0.55  | 0.40    | 0.32      | 0.91 | 0.75    |
| Coprobacter                   | -0.38  | 0.55    | 0.32      | 0.78 | 0.69    | -0.29  | 0.65    | 0.30      | 0.84 | 0.66    | 0.11   | 0.86    | 0.47      | 0.96 | 0.80    | 0.12   | 0.85    | 0.46      | 0.96 | 0.79    | 0.11   | 0.87    | 0.45      | 0.96 | 0.77    |
| Coprococcus                   | -0.70  | 0.36    | 0.38      | 0.66 | 0.74    | -0.42  | 0.58    | 0.66      | 0.82 | 0.87    | -0.53  | 0.49    | 0.50      | 0.88 | 0.80    | -0.52  | 0.50    | 0.51      | 0.88 | 0.79    | -0.54  | 0.49    | 0.54      | 0.91 | 0.77    |
| Defluviitaleaceae_UCG.011     | -1.96  | 0.06    | 0.98      | 0.37 | 0.99    | -1.98  | 0.05    | 0.83      | 0.43 | 0.99    | -1.06  | 0.31    | 0.60      | 0.88 | 0.80    | -1.06  | 0.31    | 0.60      | 0.88 | 0.79    | -1.10  | 0.30    | 0.54      | 0.88 | 0.77    |
| Desulfobivrio                 | -0.38  | 0.49    | 0.59      | 0.75 | 0.83    | -0.41  | 0.46    | 0.59      | 0.71 | 0.82    | -0.30  | 0.59    | 0.66      | 0.90 | 0.81    | -0.28  | 0.62    | 0.68      | 0.91 | 0.79    | -0.31  | 0.60    | 0.74      | 0.91 | 0.83    |
| Dialister                     | -0.07  | 0.87    | 0.44      | 0.94 | 0.74    | -0.10  | 0.82    | 0.41      | 0.94 | 0.70    | -0.05  | 0.92    | 0.41      | 0.99 | 0.80    | -0.05  | 0.91    | 0.40      | 0.99 | 0.79    | -0.04  | 0.93    | 0.43      | 0.99 | 0.77    |
| DNF00809                      | -2.10  | 0.07    | 0.23      | 0.39 | 0.64    | -1.97  | 0.09    | 0.24      | 0.45 | 0.64    | -1.92  | 0.10    | 0.38      | 0.73 | 0.80    | -1.91  | 0.11    | 0.39      | 0.73 | 0.79    | -1.94  | 0.10    | 0.38      | 0.73 | 0.77    |
| Dorea                         | -1.54  | 0.11    | 0.40      | 0.45 | 0.74    | -1.41  | 0.14    | 0.55      | 0.52 | 0.81    | -1.39  | 0.14    | 0.56      | 0.76 | 0.80    | -1.39  | 0.14    | 0.58      | 0.73 | 0.79    | -1.39  | 0.14    | 0.55      | 0.78 | 0.77    |
| DTU089                        | 0.32   | 0.73    | 0.44      | 0.87 | 0.74    | 0.35   | 0.71    | 0.47      | 0.89 | 0.77    | 0.95   | 0.31    | 0.14      | 0.88 | 0.56    | 0.98   | 0.30    | 0.14      | 0.88 | 0.55    | 0.96   | 0.31    | 0.12      | 0.88 | 0.50    |
| Eggerthella                   | 1.47   | 0.09    | 0.19      | 0.45 | 0.64    | 1.64   | 0.06    | 0.14      | 0.43 | 0.59    | 1.15   | 0.20    | 0.20      | 0.88 | 0.59    | 1.16   | 0.20    | 0.20      | 0.88 | 0.59    | 1.16   | 0.20    | 0.20      | 0.88 | 0.56    |
| Eisenbergiella                | 1.07   | 0.23    | 0.05      | 0.60 | 0.43    | 1.09   | 0.22    | 0.04      | 0.56 | 0.37    | 0.27   | 0.77    | 0.22      | 0.94 | 0.61    | 0.28   | 0.76    | 0.22      | 0.93 | 0.62    | 0.29   | 0.76    | 0.21      | 0.92 | 0.56    |
| Erysipelatoclostridium        | 1.70   | 0.05    | 0.01      | 0.37 | 0.12    | 1.65   | 0.06    | 0.01      | 0.43 | 0.11    | 0.92   | 0.31    | 0.05      | 0.88 | 0.31    | 0.92   | 0.31    | 0.05      | 0.88 | 0.31    | 0.96   | 0.29    | 0.05      | 0.88 | 0.29    |
| Erysipelotrichaceae_UCG.003   | -0.30  | 0.66    | 0.57      | 0.84 | 0.83    | -0.24  | 0.72    | 0.55      | 0.89 | 0.81    | 0.00   | 0.99    | 0.54      | 0.99 | 0.80    | -0.01  | 0.99    | 0.56      | 0.99 | 0.79    | -0.01  | 0.98    | 0.51      | 0.99 | 0.77    |
| Escherichia_Shigella          | 0.68   | 0.28    | 0.32      | 0.60 | 0.69    | 0.49   | 0.43    | 0.38      | 0.70 | 0.68    | 0.31   | 0.63    | 0.49      | 0.90 | 0.80    | 0.31   | 0.63    | 0.49      | 0.91 | 0.79    | 0.32   | 0.63    | 0.50      | 0.91 | 0.77    |
| Faecalibacterium              | -3.20  | 0.00    | 0.14      | 0.13 | 0.61    | -3.21  | 0.00    | 0.10      | 0.11 | 0.57    | -3.94  | 0.00    | 0.01      | 0.04 | 0.11    | -3.94  | 0.00    | 0.01      | 0.04 | 0.12    | -3.96  | 0.00    | 0.01      | 0.04 | 0.13    |
| Family_XIII_AD3011_group      | -0.82  | 0.35    | 0.87      | 0.66 | 0.98    | -0.44  | 0.62    | 0.70      | 0.84 | 0.88    | 0.84   | 0.35    | 0.19      | 0.88 | 0.57    | 0.86   | 0.34    | 0.18      | 0.88 | 0.57    | 0.82   | 0.37    | 0.18      | 0.91 | 0.56    |
| Family_XIII_UCG.001           | -0.52  | 0.60    | 0.56      | 0.81 | 0.83    | -0.34  | 0.74    | 0.55      | 0.89 | 0.81    | 0.40   | 0.70    | 0.25      | 0.90 | 0.63    | 0.42   | 0.69    | 0.25      | 0.91 | 0.63    | 0.34   | 0.75    | 0.25      | 0.92 | 0.65    |
| FD2005                        | -0.99  | 0.28    | 0.54      | 0.60 | 0.82    | -1.09  | 0.22    | 0.53      | 0.56 | 0.81    | -0.41  | 0.66    | 0.94      | 0.90 | 0.94    | -0.43  | 0.64    | 0.92      | 0.91 | 0.92    | -0.41  | 0.65    | 0.96      | 0.91 | 0.96    |
| Flavonifractor                | 1.02   | 0.20    | 0.18      | 0.57 | 0.62    | 1.00   | 0.20    | 0.17      | 0.56 | 0.59    | 0.03   | 0.97    | 0.55      | 0.99 | 0.80    | 0.03   | 0.97    | 0.55      | 0.99 | 0.79    | 0.02   | 0.98    | 0.51      | 0.99 | 0.77    |
| Fournierella                  | -0.74  | 0.39    | 0.50      | 0.68 | 0.78    | -0.72  | 0.40    | 0.48      | 0.68 | 0.78    | -0.22  | 0.81    | 0.52      | 0.95 | 0.80    | -0.20  | 0.82    | 0.51      | 0.95 | 0.79    | -0.18  | 0.84    | 0.64      | 0.96 | 0.82    |
| Frisingococcus                | 2.04   | 0.01    | 0.01      | 0.25 | 0.12    | 1.93   | 0.01    | 0.02      | 0.25 | 0.24    | 2.32   | 0.00    | 0.00      | 0.18 | 0.08    | 2.32   | 0.00    | 0.00      | 0.18 | 0.08    | 2.32   | 0.00    | 0.01      | 0.19 | 0.09    |
| Fusicatenibacter              | -1.13  | 0.17    | 0.38      | 0.53 | 0.74    | -1.07  | 0.19    | 0.34      | 0.56 | 0.66    | -0.53  | 0.52    | 0.80      | 0.88 | 0.85    | -0.55  | 0.51    | 0.80      | 0.88 | 0.86    | -0.53  | 0.52    | 0.83      | 0.91 | 0.88    |
| Fusobacterium                 | 1.69   | 0.04    | 0.41      | 0.36 | 0.74    | 1.55   | 0.06    | 0.38      | 0.43 | 0.68    | 0.74   | 0.37    | 0.66      | 0.88 | 0.81    | 0.76   | 0.36    | 0.66      | 0.88 | 0.79    | 0.74   | 0.38    | 0.72      | 0.91 | 0.83    |
| GCA.900066575                 | -1.27  | 0.17    | 0.94      | 0.53 | 0.98    | -1.05  | 0.26    | 0.95      | 0.61 | 0.99    | -0.95  | 0.31    | 0.65      | 0.88 | 0.81    | -0.95  | 0.31    | 0.64      | 0.88 | 0.79    | -0.98  | 0.30    | 0.72      | 0.88 | 0.83    |
| Gordonibacter                 | 1.58   | 0.13    | 0.08      | 0.48 | 0.50    | 1.75   | 0.09    | 0.07      | 0.45 | 0.44    | 2.05   | 0.05    | 0.06      | 0.51 | 0.31    | 2.07   | 0.05    | 0.06      | 0.49 | 0.32    | 2.05   | 0.05    | 0.07      | 0.53 | 0.36    |
| Granulicatella                | 0.43   | 0.74    | 0.60      | 0.87 | 0.83    | 0.26   | 0.85    | 0.67      | 0.94 | 0.87    | -0.88  | 0.52    | 0.80      | 0.88 | 0.85    | -0.86  | 0.54    | 0.83      | 0.88 | 0.87    | -0.87  | 0.53    | 0.81      | 0.91 | 0.88    |

|                       |       |      |      |      |      |       |      |      |      |      |       |      |      |      |      |       |      |      |      |      |       |      |      |      |      |
|-----------------------|-------|------|------|------|------|-------|------|------|------|------|-------|------|------|------|------|-------|------|------|------|------|-------|------|------|------|------|
| Monoglobus            | -1.22 | 0.13 | 0.38 | 0.48 | 0.74 | -1.08 | 0.18 | 0.36 | 0.56 | 0.66 | 0.68  | 0.42 | 0.02 | 0.88 | 0.21 | 0.68  | 0.42 | 0.02 | 0.88 | 0.22 | 0.66  | 0.44 | 0.02 | 0.91 | 0.16 |
| Moryella              | -1.79 | 0.11 | 0.39 | 0.45 | 0.74 | -1.60 | 0.15 | 0.34 | 0.52 | 0.66 | -0.28 | 0.81 | 0.77 | 0.95 | 0.84 | -0.27 | 0.81 | 0.78 | 0.95 | 0.85 | -0.28 | 0.81 | 0.83 | 0.96 | 0.88 |
| Negativibacillus      | 0.45  | 0.55 | 0.28 | 0.78 | 0.64 | 0.57  | 0.44 | 0.18 | 0.71 | 0.59 | 0.60  | 0.43 | 0.10 | 0.88 | 0.44 | 0.60  | 0.44 | 0.10 | 0.88 | 0.44 | 0.61  | 0.43 | 0.09 | 0.91 | 0.46 |
| NK4A214_group         | -0.21 | 0.71 | 0.41 | 0.87 | 0.74 | -0.03 | 0.95 | 0.34 | 0.99 | 0.66 | 0.84  | 0.15 | 0.04 | 0.78 | 0.26 | 0.85  | 0.15 | 0.04 | 0.77 | 0.27 | 0.82  | 0.17 | 0.04 | 0.85 | 0.27 |
| Odoribacter           | 0.47  | 0.41 | 0.29 | 0.69 | 0.65 | 0.50  | 0.38 | 0.34 | 0.68 | 0.66 | 0.61  | 0.29 | 0.37 | 0.88 | 0.80 | 0.61  | 0.30 | 0.38 | 0.88 | 0.79 | 0.59  | 0.31 | 0.34 | 0.88 | 0.75 |
| Oscillibacter         | -0.29 | 0.76 | 0.27 | 0.87 | 0.64 | -0.18 | 0.85 | 0.27 | 0.94 | 0.64 | 0.61  | 0.53 | 0.06 | 0.88 | 0.31 | 0.62  | 0.53 | 0.06 | 0.88 | 0.32 | 0.58  | 0.56 | 0.06 | 0.91 | 0.33 |
| Oscillospira          | 1.15  | 0.39 | 0.08 | 0.68 | 0.50 | 1.24  | 0.35 | 0.06 | 0.68 | 0.42 | 1.11  | 0.40 | 0.05 | 0.88 | 0.31 | 1.12  | 0.40 | 0.05 | 0.88 | 0.31 | 1.07  | 0.42 | 0.04 | 0.91 | 0.27 |
| Oxalobacter           | -1.92 | 0.04 | 0.15 | 0.36 | 0.61 | -1.62 | 0.08 | 0.14 | 0.45 | 0.59 | -0.68 | 0.48 | 0.29 | 0.88 | 0.70 | -0.67 | 0.48 | 0.29 | 0.88 | 0.71 | -0.71 | 0.47 | 0.27 | 0.91 | 0.68 |
| Paludicola            | -1.31 | 0.17 | 0.78 | 0.53 | 0.98 | -0.86 | 0.37 | 0.99 | 0.68 | 0.99 | 0.47  | 0.63 | 0.30 | 0.90 | 0.70 | 0.49  | 0.62 | 0.30 | 0.91 | 0.71 | 0.46  | 0.65 | 0.32 | 0.91 | 0.75 |
| Parabacteroides       | 0.00  | 1.00 | 0.85 | 1.00 | 0.98 | -0.15 | 0.82 | 0.90 | 0.94 | 0.99 | -0.20 | 0.77 | 0.92 | 0.94 | 0.93 | -0.18 | 0.80 | 0.88 | 0.95 | 0.90 | -0.20 | 0.77 | 0.90 | 0.93 | 0.91 |
| Paraprevotella        | -0.48 | 0.31 | 0.04 | 0.60 | 0.42 | -0.56 | 0.23 | 0.03 | 0.56 | 0.33 | -0.78 | 0.11 | 0.01 | 0.75 | 0.11 | -0.77 | 0.12 | 0.01 | 0.73 | 0.12 | -0.75 | 0.13 | 0.01 | 0.78 | 0.13 |
| Parasutterella        | -0.77 | 0.14 | 0.91 | 0.48 | 0.98 | -0.77 | 0.14 | 0.99 | 0.52 | 0.99 | -0.31 | 0.56 | 0.64 | 0.90 | 0.81 | -0.32 | 0.55 | 0.64 | 0.90 | 0.79 | -0.33 | 0.54 | 0.61 | 0.91 | 0.82 |
| Peptococcus           | -0.93 | 0.31 | 0.73 | 0.60 | 0.95 | -0.69 | 0.45 | 0.77 | 0.71 | 0.95 | 0.14  | 0.88 | 0.86 | 0.97 | 0.89 | 0.16  | 0.86 | 0.86 | 0.96 | 0.89 | 0.17  | 0.86 | 0.90 | 0.96 | 0.91 |
| Phascolarctobacterium | -0.07 | 0.88 | 0.34 | 0.94 | 0.70 | -0.06 | 0.89 | 0.29 | 0.97 | 0.64 | -0.21 | 0.68 | 0.57 | 0.90 | 0.80 | -0.20 | 0.68 | 0.57 | 0.91 | 0.79 | -0.22 | 0.66 | 0.58 | 0.91 | 0.79 |
| Phocaea               | 1.44  | 0.22 | 0.63 | 0.57 | 0.85 | 1.70  | 0.14 | 0.51 | 0.52 | 0.80 | 1.44  | 0.22 | 0.82 | 0.88 | 0.86 | 1.44  | 0.22 | 0.81 | 0.88 | 0.86 | 1.45  | 0.22 | 0.76 | 0.88 | 0.85 |
| Prevotella            | 0.07  | 0.85 | 0.08 | 0.93 | 0.50 | 0.02  | 0.95 | 0.12 | 0.99 | 0.59 | -0.28 | 0.49 | 0.03 | 0.88 | 0.24 | -0.28 | 0.49 | 0.03 | 0.88 | 0.25 | -0.28 | 0.49 | 0.04 | 0.91 | 0.29 |
| Romboutsia            | -0.64 | 0.39 | 0.65 | 0.68 | 0.87 | -0.78 | 0.29 | 0.60 | 0.65 | 0.82 | -0.87 | 0.25 | 0.60 | 0.88 | 0.80 | -0.88 | 0.25 | 0.59 | 0.88 | 0.79 | -0.88 | 0.25 | 0.64 | 0.88 | 0.82 |
| Roseburia             | -1.66 | 0.09 | 0.11 | 0.45 | 0.60 | -1.38 | 0.16 | 0.18 | 0.54 | 0.59 | -1.25 | 0.23 | 0.16 | 0.88 | 0.57 | -1.26 | 0.22 | 0.15 | 0.88 | 0.57 | -1.26 | 0.22 | 0.20 | 0.88 | 0.56 |
| Ruminococcus          | -0.37 | 0.53 | 0.94 | 0.78 | 0.98 | -0.26 | 0.65 | 0.98 | 0.84 | 0.99 | 0.39  | 0.52 | 0.46 | 0.88 | 0.80 | 0.39  | 0.52 | 0.46 | 0.88 | 0.79 | 0.37  | 0.54 | 0.45 | 0.91 | 0.77 |
| Sellimonas            | -0.62 | 0.45 | 0.77 | 0.71 | 0.97 | -0.70 | 0.39 | 0.57 | 0.68 | 0.81 | -0.95 | 0.24 | 0.49 | 0.88 | 0.80 | -0.95 | 0.25 | 0.49 | 0.88 | 0.79 | -0.95 | 0.25 | 0.51 | 0.88 | 0.77 |
| Senegalimassilia      | -0.94 | 0.21 | 0.26 | 0.57 | 0.64 | -0.92 | 0.22 | 0.28 | 0.56 | 0.64 | -0.33 | 0.66 | 0.62 | 0.90 | 0.81 | -0.32 | 0.68 | 0.63 | 0.91 | 0.79 | -0.32 | 0.68 | 0.69 | 0.91 | 0.83 |
| Shuttleworthia        | -0.45 | 0.64 | 0.46 | 0.83 | 0.74 | -0.27 | 0.78 | 0.56 | 0.94 | 0.81 | 0.21  | 0.83 | 0.43 | 0.95 | 0.80 | 0.20  | 0.84 | 0.44 | 0.95 | 0.79 | 0.19  | 0.85 | 0.48 | 0.96 | 0.77 |
| Slackia               | -1.30 | 0.05 | 0.17 | 0.37 | 0.62 | -1.41 | 0.03 | 0.14 | 0.36 | 0.59 | -0.70 | 0.30 | 0.53 | 0.88 | 0.80 | -0.69 | 0.31 | 0.55 | 0.88 | 0.79 | -0.70 | 0.30 | 0.56 | 0.88 | 0.77 |
| Streptococcus         | -0.47 | 0.64 | 0.43 | 0.83 | 0.74 | -0.45 | 0.65 | 0.42 | 0.84 | 0.72 | -0.22 | 0.84 | 0.19 | 0.95 | 0.57 | -0.16 | 0.88 | 0.17 | 0.97 | 0.57 | -0.17 | 0.87 | 0.21 | 0.96 | 0.56 |
| Subdoligranulum       | -0.88 | 0.26 | 0.81 | 0.60 | 0.98 | -0.76 | 0.32 | 0.83 | 0.68 | 0.99 | -0.52 | 0.50 | 0.58 | 0.88 | 0.80 | -0.51 | 0.51 | 0.58 | 0.88 | 0.79 | -0.52 | 0.51 | 0.50 | 0.91 | 0.77 |
| Sutterella            | -0.19 | 0.68 | 0.20 | 0.85 | 0.64 | -0.29 | 0.52 | 0.22 | 0.77 | 0.62 | -0.83 | 0.07 | 0.03 | 0.69 | 0.24 | -0.83 | 0.07 | 0.03 | 0.71 | 0.25 | -0.83 | 0.07 | 0.03 | 0.73 | 0.25 |
| TM7x                  | 0.31  | 0.77 | 0.39 | 0.88 | 0.74 | 0.49  | 0.65 | 0.39 | 0.84 | 0.68 | 0.21  | 0.84 | 0.57 | 0.95 | 0.80 | 0.22  | 0.84 | 0.56 | 0.95 | 0.79 | 0.21  | 0.85 | 0.54 | 0.96 | 0.77 |
| Turicibacter          | -1.22 | 0.20 | 0.25 | 0.57 | 0.64 | -1.52 | 0.11 | 0.19 | 0.49 | 0.59 | -2.29 | 0.02 | 0.05 | 0.26 | 0.31 | -2.32 | 0.02 | 0.05 | 0.25 | 0.31 | -2.31 | 0.02 | 0.06 | 0.25 | 0.33 |
| Tuzzerella            | 1.83  | 0.01 | 0.04 | 0.25 | 0.43 | 1.81  | 0.01 | 0.03 | 0.25 | 0.33 | 1.28  | 0.09 | 0.16 | 0.73 | 0.57 | 1.28  | 0.10 | 0.17 | 0.73 | 0.57 | 1.27  | 0.10 | 0.18 | 0.73 | 0.56 |
| UBA1819               | 1.77  | 0.11 | 0.01 | 0.45 | 0.12 | 1.92  | 0.08 | 0.00 | 0.45 | 0.11 | 1.40  | 0.21 | 0.00 | 0.88 | 0.08 | 1.40  | 0.21 | 0.00 | 0.88 | 0.08 | 1.35  | 0.23 | 0.00 | 0.88 | 0.07 |
| UCG_002               | -0.15 | 0.80 | 0.97 | 0.88 | 0.99 | 0.04  | 0.95 | 0.91 | 0.99 | 0.99 | 0.52  | 0.38 | 0.67 | 0.88 | 0.81 | 0.53  | 0.37 | 0.67 | 0.88 | 0.79 | 0.51  | 0.40 | 0.63 | 0.91 | 0.82 |
| UCG_003               | -1.44 | 0.02 | 0.09 | 0.25 | 0.51 | -1.25 | 0.04 | 0.10 | 0.36 | 0.57 | -1.00 | 0.10 | 0.14 | 0.73 | 0.56 | -0.99 | 0.10 | 0.14 | 0.73 | 0.55 | -1.00 | 0.10 | 0.13 | 0.73 | 0.50 |
| UCG_005               | -1.23 | 0.07 | 0.93 | 0.39 | 0.98 | -1.11 | 0.10 | 0.90 | 0.45 | 0.99 | -0.19 | 0.79 | 0.47 | 0.95 | 0.80 | -0.18 | 0.80 | 0.47 | 0.95 | 0.79 | -0.22 | 0.76 | 0.41 | 0.92 | 0.77 |
| UCG_009               | -1.12 | 0.27 | 0.75 | 0.60 | 0.96 | -0.90 | 0.37 | 0.68 | 0.68 | 0.87 | 0.04  | 0.97 | 0.73 | 0.99 | 0.81 | 0.05  | 0.96 | 0.73 | 0.99 | 0.80 | 0.03  | 0.98 | 0.69 | 0.99 | 0.83 |
| Veillonella           | 0.02  | 0.98 | 0.87 | 1.00 | 0.98 | -0.02 | 0.98 | 0.94 | 0.99 | 0.99 | -0.23 | 0.74 | 0.57 | 0.92 | 0.80 | -0.23 | 0.74 | 0.58 | 0.92 | 0.79 | -0.23 | 0.75 | 0.54 | 0.92 | 0.77 |
| Victivallis           | -1.28 | 0.06 | 0.49 | 0.37 | 0.77 | -1.16 | 0.08 | 0.46 | 0.45 | 0.76 | -0.66 | 0.33 | 0.57 | 0.88 | 0.80 | -0.66 | 0.33 | 0.55 | 0.88 | 0.79 | -0.67 | 0.32 | 0.51 | 0.88 | 0.77 |

Multivariable-adjusted regression models adjusted for:

Model 1: sequencing batch, age, race, gender, study center

Model 2: Model 1, with education

Model 3: Model 2, with physical activity, diet score, medication use, and smoking

Model 4: Model 3 with BMI

Model 5: Model 4 with hypertension and diabetes

eTable 42: Multivariable-adjusted regression coefficients, p-values, sex interaction p-values, false discovery rate (FDR)-adjusted p-values sex-genera interaction with respect to RAVLT.

|                               | Model1 |         |           |      |         | Model2 |         |           |      |         | Model3 |         |           |      |         | Model4 |         |           |      |         | Model5 |         |           |      |         |
|-------------------------------|--------|---------|-----------|------|---------|--------|---------|-----------|------|---------|--------|---------|-----------|------|---------|--------|---------|-----------|------|---------|--------|---------|-----------|------|---------|
|                               | beta   | p-value | p-val Int | FDR  | FDR-int | beta   | p-value | p-val Int | FDR  | FDR-int | beta   | p-value | p-val Int | FDR  | FDR-int | beta   | p-value | p-val Int | FDR  | FDR-int | beta   | p-value | p-val Int | FDR  | FDR-int |
| Acetanaerobacterium           | 0.03   | 0.91    | 0.70      | 0.96 | 0.99    | 0.03   | 0.90    | 0.99      | 0.95 | 1.00    | -0.14  | 0.56    | 0.80      | 0.83 | 0.94    | -0.14  | 0.56    | 0.82      | 0.84 | 0.94    | -0.14  | 0.55    | 0.81      | 0.84 | 0.95    |
| Acidaminococcus               | -0.17  | 0.01    | 0.74      | 0.23 | 0.99    | -0.13  | 0.06    | 0.69      | 0.57 | 1.00    | -0.12  | 0.09    | 0.48      | 0.53 | 0.94    | -0.12  | 0.09    | 0.48      | 0.54 | 0.94    | -0.12  | 0.10    | 0.51      | 0.56 | 0.95    |
| Actinomyces                   | -0.12  | 0.55    | 0.96      | 0.71 | 0.99    | -0.11  | 0.58    | 0.82      | 0.82 | 1.00    | -0.08  | 0.71    | 0.83      | 0.94 | 0.94    | -0.09  | 0.67    | 0.77      | 0.91 | 0.94    | -0.09  | 0.68    | 0.75      | 0.92 | 0.95    |
| Adlercreutzia                 | 0.08   | 0.46    | 0.25      | 0.67 | 0.99    | 0.10   | 0.37    | 0.41      | 0.70 | 1.00    | 0.08   | 0.47    | 0.55      | 0.83 | 0.94    | 0.09   | 0.46    | 0.57      | 0.84 | 0.94    | 0.08   | 0.47    | 0.59      | 0.84 | 0.95    |
| Agathobacter                  | 0.03   | 0.83    | 0.26      | 0.90 | 0.99    | -0.03  | 0.87    | 0.41      | 0.94 | 1.00    | -0.13  | 0.43    | 0.72      | 0.81 | 0.94    | -0.12  | 0.45    | 0.72      | 0.83 | 0.94    | -0.13  | 0.43    | 0.78      | 0.81 | 0.95    |
| Akkermansia                   | 0.09   | 0.26    | 0.89      | 0.54 | 0.99    | 0.03   | 0.68    | 0.60      | 0.93 | 1.00    | 0.01   | 0.94    | 0.55      | 0.98 | 0.94    | 0.01   | 0.92    | 0.57      | 0.97 | 0.94    | 0.01   | 0.93    | 0.56      | 0.98 | 0.95    |
| Alistipes                     | 0.26   | 0.07    | 0.64      | 0.38 | 0.99    | 0.17   | 0.22    | 0.97      | 0.58 | 1.00    | 0.09   | 0.52    | 0.97      | 0.83 | 0.98    | 0.10   | 0.51    | 0.99      | 0.84 | 0.99    | 0.09   | 0.52    | 1.00      | 0.84 | 1.00    |
| Allisonella                   | -0.06  | 0.63    | 0.03      | 0.76 | 0.99    | 0.04   | 0.72    | 0.04      | 0.93 | 0.88    | 0.04   | 0.77    | 0.13      | 0.94 | 0.94    | 0.04   | 0.78    | 0.14      | 0.95 | 0.94    | 0.04   | 0.74    | 0.13      | 0.95 | 0.95    |
| Anaerofilum                   | 0.17   | 0.32    | 0.58      | 0.60 | 0.99    | 0.10   | 0.57    | 0.76      | 0.82 | 1.00    | 0.11   | 0.54    | 0.92      | 0.83 | 0.98    | 0.11   | 0.54    | 0.94      | 0.84 | 0.99    | 0.11   | 0.54    | 0.92      | 0.84 | 0.98    |
| Anaerostipes                  | 0.14   | 0.48    | 0.58      | 0.69 | 0.99    | 0.05   | 0.78    | 0.74      | 0.94 | 1.00    | 0.09   | 0.62    | 0.49      | 0.88 | 0.94    | 0.10   | 0.60    | 0.47      | 0.86 | 0.94    | 0.10   | 0.61    | 0.53      | 0.85 | 0.95    |
| Anaerotruncus                 | 0.06   | 0.72    | 0.86      | 0.81 | 0.99    | -0.01  | 0.94    | 0.93      | 0.95 | 1.00    | -0.03  | 0.85    | 0.78      | 0.96 | 0.94    | -0.04  | 0.82    | 0.77      | 0.95 | 0.94    | -0.04  | 0.83    | 0.76      | 0.95 | 0.95    |
| Bacteroides                   | 0.30   | 0.21    | 0.16      | 0.50 | 0.99    | 0.26   | 0.26    | 0.13      | 0.61 | 1.00    | 0.21   | 0.37    | 0.20      | 0.81 | 0.94    | 0.22   | 0.36    | 0.20      | 0.82 | 0.94    | 0.22   | 0.36    | 0.18      | 0.81 | 0.95    |
| Barnesiella                   | 0.10   | 0.18    | 0.80      | 0.50 | 0.99    | 0.11   | 0.13    | 0.91      | 0.57 | 1.00    | 0.10   | 0.20    | 0.94      | 0.66 | 0.98    | 0.10   | 0.20    | 0.94      | 0.66 | 0.99    | 0.10   | 0.20    | 0.99      | 0.65 | 1.00    |
| Bifidobacterium               | -0.04  | 0.68    | 0.61      | 0.79 | 0.99    | 0.02   | 0.81    | 0.62      | 0.94 | 1.00    | 0.00   | 0.98    | 0.48      | 0.99 | 0.94    | 0.00   | 0.96    | 0.48      | 0.98 | 0.94    | 0.00   | 0.97    | 0.47      | 0.99 | 0.95    |
| Blifilphia                    | 0.14   | 0.20    | 0.98      | 0.50 | 0.99    | 0.07   | 0.52    | 0.62      | 0.79 | 1.00    | 0.07   | 0.52    | 0.74      | 0.83 | 0.94    | 0.07   | 0.50    | 0.77      | 0.84 | 0.94    | 0.07   | 0.51    | 0.81      | 0.84 | 0.95    |
| Blautia                       | 0.33   | 0.34    | 0.33      | 0.61 | 0.99    | 0.11   | 0.75    | 0.62      | 0.93 | 1.00    | 0.10   | 0.78    | 0.75      | 0.94 | 0.94    | 0.10   | 0.77    | 0.73      | 0.95 | 0.94    | 0.10   | 0.78    | 0.84      | 0.95 | 0.95    |
| Butyrivococcus                | 0.17   | 0.52    | 0.76      | 0.71 | 0.99    | -0.04  | 0.88    | 0.96      | 0.94 | 1.00    | -0.07  | 0.78    | 0.79      | 0.94 | 0.94    | -0.07  | 0.79    | 0.79      | 0.95 | 0.94    | -0.07  | 0.79    | 0.81      | 0.95 | 0.95    |
| Butyricimonas                 | -0.08  | 0.38    | 0.05      | 0.62 | 0.99    | -0.11  | 0.17    | 0.03      | 0.57 | 0.88    | -0.11  | 0.18    | 0.03      | 0.64 | 0.82    | -0.11  | 0.18    | 0.03      | 0.64 | 0.80    | -0.12  | 0.18    | 0.03      | 0.65 | 0.78    |
| CAG_56                        | 0.17   | 0.07    | 0.17      | 0.38 | 0.99    | 0.13   | 0.16    | 0.23      | 0.57 | 1.00    | 0.11   | 0.26    | 0.20      | 0.81 | 0.94    | 0.11   | 0.26    | 0.21      | 0.81 | 0.94    | 0.11   | 0.26    | 0.23      | 0.81 | 0.95    |
| Candidatus_Soleaferrea        | -0.12  | 0.54    | 0.64      | 0.71 | 0.99    | -0.21  | 0.24    | 0.39      | 0.58 | 1.00    | -0.27  | 0.16    | 0.25      | 0.64 | 0.94    | -0.27  | 0.16    | 0.26      | 0.64 | 0.94    | -0.27  | 0.16    | 0.28      | 0.65 | 0.95    |
| Caproiciproducens             | -0.17  | 0.33    | 0.16      | 0.60 | 0.99    | -0.20  | 0.24    | 0.09      | 0.58 | 1.00    | -0.31  | 0.08    | 0.06      | 0.53 | 0.94    | -0.31  | 0.08    | 0.06      | 0.54 | 0.94    | -0.31  | 0.08    | 0.07      | 0.55 | 0.95    |
| Christensenellaceae_R.7_group | 0.06   | 0.49    | 0.47      | 0.69 | 0.99    | 0.02   | 0.81    | 0.50      | 0.94 | 1.00    | 0.00   | 0.96    | 0.82      | 0.99 | 0.94    | 0.00   | 0.97    | 0.83      | 0.98 | 0.94    | 0.00   | 0.97    | 0.79      | 0.99 | 0.95    |
| Clostridium_sensu_stricto_1   | 0.05   | 0.64    | 0.40      | 0.76 | 0.99    | 0.08   | 0.38    | 0.56      | 0.70 | 1.00    | 0.09   | 0.38    | 0.76      | 0.81 | 0.94    | 0.09   | 0.37    | 0.76      | 0.82 | 0.94    | 0.09   | 0.36    | 0.84      | 0.81 | 0.95    |
| Colidextribacter              | -0.22  | 0.26    | 0.88      | 0.54 | 0.99    | -0.33  | 0.08    | 0.59      | 0.57 | 1.00    | -0.35  | 0.07    | 0.83      | 0.53 | 0.94    | -0.35  | 0.07    | 0.85      | 0.54 | 0.95    | -0.36  | 0.07    | 0.79      | 0.54 | 0.95    |
| Collinsella                   | -0.15  | 0.12    | 0.54      | 0.44 | 0.99    | -0.12  | 0.21    | 0.84      | 0.58 | 1.00    | -0.15  | 0.14    | 0.76      | 0.62 | 0.94    | -0.15  | 0.14    | 0.74      | 0.61 | 0.94    | -0.15  | 0.14    | 0.78      | 0.62 | 0.95    |
| Coprobacter                   | 0.05   | 0.63    | 0.54      | 0.76 | 0.99    | 0.02   | 0.84    | 0.47      | 0.94 | 1.00    | -0.01  | 0.93    | 0.44      | 0.98 | 0.94    | -0.01  | 0.93    | 0.44      | 0.97 | 0.94    | -0.01  | 0.93    | 0.45      | 0.98 | 0.95    |
| Coprococcus                   | 0.27   | 0.02    | 0.04      | 0.29 | 0.99    | 0.18   | 0.10    | 0.21      | 0.57 | 1.00    | 0.16   | 0.16    | 0.21      | 0.64 | 0.94    | 0.16   | 0.17    | 0.21      | 0.64 | 0.94    | 0.16   | 0.17    | 0.24      | 0.65 | 0.95    |
| Defluviitaleaceae_UCG.011     | 0.34   | 0.04    | 0.59      | 0.35 | 0.99    | 0.34   | 0.03    | 0.34      | 0.53 | 1.00    | 0.41   | 0.01    | 0.14      | 0.37 | 0.94    | 0.41   | 0.01    | 0.13      | 0.37 | 0.94    | 0.41   | 0.01    | 0.13      | 0.37 | 0.95    |
| Desulfobivrio                 | -0.08  | 0.36    | 0.77      | 0.62 | 0.99    | -0.07  | 0.39    | 0.75      | 0.70 | 1.00    | -0.07  | 0.42    | 0.95      | 0.81 | 0.98    | -0.08  | 0.38    | 0.91      | 0.82 | 0.98    | -0.08  | 0.39    | 0.87      | 0.81 | 0.95    |
| Dialister                     | 0.09   | 0.18    | 0.11      | 0.50 | 0.99    | 0.10   | 0.14    | 0.08      | 0.57 | 1.00    | 0.07   | 0.32    | 0.16      | 0.81 | 0.94    | 0.07   | 0.31    | 0.16      | 0.82 | 0.94    | 0.07   | 0.32    | 0.17      | 0.81 | 0.95    |
| DNF0809                       | 0.22   | 0.23    | 0.40      | 0.51 | 0.99    | 0.18   | 0.30    | 0.42      | 0.66 | 1.00    | 0.16   | 0.39    | 0.47      | 0.81 | 0.94    | 0.15   | 0.40    | 0.48      | 0.82 | 0.94    | 0.16   | 0.39    | 0.46      | 0.81 | 0.95    |
| Dorea                         | 0.03   | 0.86    | 0.41      | 0.92 | 0.99    | -0.01  | 0.92    | 0.76      | 0.95 | 1.00    | -0.02  | 0.91    | 0.79      | 0.98 | 0.94    | -0.02  | 0.91    | 0.80      | 0.97 | 0.94    | -0.02  | 0.90    | 0.78      | 0.97 | 0.95    |
| DTU089                        | 0.00   | 0.99    | 0.88      | 1.00 | 0.99    | -0.01  | 0.93    | 0.78      | 0.95 | 1.00    | -0.03  | 0.86    | 0.79      | 0.96 | 0.94    | -0.03  | 0.83    | 0.81      | 0.95 | 0.94    | -0.03  | 0.85    | 0.86      | 0.96 | 0.95    |
| Eggerthella                   | 0.14   | 0.29    | 0.78      | 0.59 | 0.99    | 0.10   | 0.47    | 1.00      | 0.78 | 1.00    | 0.14   | 0.33    | 0.68      | 0.81 | 0.94    | 0.14   | 0.34    | 0.68      | 0.82 | 0.94    | 0.13   | 0.34    | 0.75      | 0.81 | 0.95    |
| Eisenbergiella                | -0.19  | 0.18    | 0.23      | 0.50 | 0.99    | -0.19  | 0.15    | 0.19      | 0.57 | 1.00    | -0.22  | 0.13    | 0.18      | 0.61 | 0.94    | -0.23  | 0.12    | 0.19      | 0.60 | 0.94    | -0.23  | 0.12    | 0.16      | 0.61 | 0.95    |
| Erysipelatoclostridium        | 0.08   | 0.58    | 0.95      | 0.73 | 0.99    | 0.09   | 0.49    | 0.97      | 0.79 | 1.00    | 0.14   | 0.33    | 0.68      | 0.81 | 0.94    | 0.14   | 0.34    | 0.67      | 0.82 | 0.94    | 0.14   | 0.34    | 0.69      | 0.81 | 0.95    |
| Erysipelotrichaceae_UCG.003   | 0.04   | 0.73    | 0.78      | 0.82 | 0.99    | 0.02   | 0.86    | 0.83      | 0.94 | 1.00    | -0.02  | 0.87    | 0.86      | 0.96 | 0.95    | -0.02  | 0.88    | 0.83      | 0.96 | 0.94    | -0.01  | 0.89    | 0.82      | 0.97 | 0.95    |
| Escherichia_Shigella          | -0.15  | 0.13    | 0.15      | 0.45 | 0.99    | -0.09  | 0.35    | 0.20      | 0.70 | 1.00    | -0.11  | 0.29    | 0.12      | 0.81 | 0.94    | -0.11  | 0.29    | 0.12      | 0.82 | 0.94    | -0.11  | 0.28    | 0.11      | 0.81 | 0.95    |
| Faecalibacterium              | 0.26   | 0.11    | 0.66      | 0.44 | 0.99    | 0.27   | 0.09    | 0.40      | 0.57 | 1.00    | 0.34   | 0.05    | 0.20      | 0.53 | 0.94    | 0.34   | 0.05    | 0.20      | 0.54 | 0.94    | 0.35   | 0.05    | 0.21      | 0.54 | 0.95    |
| Family_XIII_AD3011_group      | 0.27   | 0.05    | 0.36      | 0.35 | 0.99    | 0.14   | 0.27    | 0.64      | 0.61 | 1.00    | 0.09   | 0.54    | 0.50      | 0.83 | 0.94    | 0.08   | 0.57    | 0.50      | 0.84 | 0.94    | 0.08   | 0.57    | 0.54      | 0.84 | 0.95    |
| Family_XIII_UCG.001           | 0.00   | 0.99    | 0.29      | 1.00 | 0.99    | -0.06  | 0.71    | 0.24      | 0.93 | 1.00    | -0.05  | 0.76    | 0.44      | 0.94 | 0.94    | -0.05  | 0.74    | 0.44      | 0.95 | 0.94    | -0.05  | 0.75    | 0.43      | 0.95 | 0.95    |
| FD2005                        | -0.08  | 0.59    | 0.89      | 0.73 | 0.99    | -0.04  | 0.75    | 0.86      | 0.93 | 1.00    | -0.09  | 0.53    | 0.62      | 0.83 | 0.94    | -0.09  | 0.55    | 0.64      | 0.84 | 0.94    | -0.09  | 0.54    | 0.61      | 0.84 | 0.95    |
| Flavonifractor                | -0.11  | 0.39    | 0.69      | 0.62 | 0.99    | -0.10  | 0.38    | 0.65      | 0.70 | 1.00    | -0.15  | 0.24    | 0.50      | 0.78 | 0.94    | -0.15  | 0.24    | 0.50      | 0.78 | 0.94    | -0.15  | 0.24    | 0.50      | 0.79 | 0.95    |
| Fournierella                  | 0.05   | 0.69    | 0.99      | 0.79 | 0.99    | 0.05   | 0.71    | 0.92      | 0.93 | 1.00    | 0.11   | 0.42    | 0.52      | 0.81 | 0.94    | 0.11   | 0.43    | 0.52      | 0.82 | 0.94    | 0.11   | 0.43    | 0.62      | 0.81 | 0.95    |
| Frisingococcus                | -0.01  | 0.96    | 0.74      | 1.00 | 0.99    | 0.03   | 0.83    | 0.80      | 0.94 | 1.00    | -0.06  | 0.65    | 0.93      | 0.89 | 0.98    | -0.06  | 0.65    | 0.90      | 0.90 | 0.98    | -0.05  | 0.67    | 0.92      | 0.91 | 0.98    |
| Fusicatenibacter              | 0.10   | 0.43    | 0.30      | 0.66 | 0.99    | 0.08   | 0.51    | 0.21      | 0.79 | 1.00    | 0.02   | 0.89    | 0.33      | 0.96 | 0.94    | 0.02   | 0.88    | 0.33      | 0.96 | 0.94    | 0.02   | 0.89    | 0.33      | 0.97 | 0.95    |
| Fusobacterium                 | -0.20  | 0.12    | 0.39      | 0.44 | 0.99    | -0.15  | 0.22    | 0.33      | 0.58 | 1.00    | -0.07  | 0.59    | 0.27      | 0.85 | 0.94    | -0.07  | 0.57    | 0.28      | 0.84 | 0.94    | -0.08  | 0.56    | 0.26      | 0.84 | 0.95    |
| GCA_900066575                 | -0.14  | 0.33    | 0.18      | 0.60 | 0.99    | -0.22  | 0.12    | 0.17      | 0.57 | 1.00    | -0.21  | 0.15    | 0.42      | 0.62 | 0.94    | -0.21  | 0.14    | 0.45      | 0.61 | 0.94    | -0.21  | 0.14    | 0.48      | 0.62 | 0.95    |
| Gordonibacter                 | 0.20   | 0.23    | 0.56      | 0.51 | 0.99    | 0.14   | 0.36    | 0.48      | 0.70 | 1.00    | 0.14   | 0.38    | 0.80      | 0.81 | 0.94    | 0.14   | 0.38    | 0.81      | 0.82 | 0.94    | 0.14   | 0.38    | 0.82      | 0.81 | 0.95    |
| Granulicatella                | 0.13   | 0.54    | 0.87      | 0.71 | 0.99    | 0.18   | 0.36    | 0.67      | 0.70 | 1.00    | 0.18   | 0.41    | 0.67      | 0.81 | 0.94    | 0.17   | 0.43    | 0.71      | 0.82 | 0.94    | 0.18   | 0.42    | 0.74      | 0.81 | 0.95    |

|                       |       |      |      |      |      |       |      |      |      |      |       |      |      |      |      |       |      |      |      |      |       |      |      |      |      |
|-----------------------|-------|------|------|------|------|-------|------|------|------|------|-------|------|------|------|------|-------|------|------|------|------|-------|------|------|------|------|
| Monoglobus            | 0.34  | 0.01 | 0.30 | 0.23 | 0.99 | 0.29  | 0.01 | 0.31 | 0.38 | 1.00 | 0.27  | 0.04 | 0.32 | 0.53 | 0.94 | 0.27  | 0.04 | 0.31 | 0.54 | 0.94 | 0.28  | 0.04 | 0.36 | 0.54 | 0.95 |
| Moryella              | 0.17  | 0.33 | 0.85 | 0.60 | 0.99 | 0.11  | 0.51 | 0.73 | 0.79 | 1.00 | 0.00  | 0.98 | 0.93 | 0.99 | 0.98 | 0.00  | 0.99 | 0.94 | 0.89 | 0.99 | 0.00  | 1.00 | 0.99 | 1.00 | 1.00 |
| Negativibacillus      | -0.15 | 0.20 | 0.70 | 0.50 | 0.99 | -0.19 | 0.10 | 0.34 | 0.57 | 1.00 | -0.21 | 0.09 | 0.29 | 0.53 | 0.94 | -0.20 | 0.09 | 0.30 | 0.54 | 0.94 | -0.21 | 0.09 | 0.33 | 0.55 | 0.95 |
| NK4A214_group         | 0.11  | 0.22 | 0.43 | 0.51 | 0.99 | 0.05  | 0.54 | 0.59 | 0.81 | 1.00 | 0.05  | 0.57 | 0.36 | 0.84 | 0.94 | 0.05  | 0.59 | 0.36 | 0.85 | 0.94 | 0.05  | 0.58 | 0.40 | 0.84 | 0.95 |
| Odoribacter           | 0.11  | 0.20 | 0.92 | 0.50 | 0.99 | 0.11  | 0.21 | 0.74 | 0.58 | 1.00 | 0.08  | 0.36 | 0.74 | 0.81 | 0.94 | 0.08  | 0.36 | 0.73 | 0.82 | 0.94 | 0.08  | 0.36 | 0.75 | 0.81 | 0.95 |
| Oscillibacter         | 0.25  | 0.09 | 0.73 | 0.44 | 0.99 | 0.22  | 0.13 | 0.70 | 0.57 | 1.00 | 0.09  | 0.56 | 0.97 | 0.83 | 0.98 | 0.09  | 0.57 | 0.97 | 0.84 | 0.99 | 0.09  | 0.57 | 0.95 | 0.84 | 0.99 |
| Oscillospira          | 0.07  | 0.74 | 0.85 | 0.82 | 0.99 | 0.03  | 0.86 | 0.94 | 0.94 | 1.00 | -0.05 | 0.81 | 0.75 | 0.94 | 0.94 | -0.05 | 0.80 | 0.75 | 0.95 | 0.94 | -0.05 | 0.81 | 0.72 | 0.95 | 0.95 |
| Oxalobacter           | 0.23  | 0.11 | 0.94 | 0.44 | 0.99 | 0.14  | 0.33 | 1.00 | 0.69 | 1.00 | 0.15  | 0.31 | 0.48 | 0.81 | 0.94 | 0.15  | 0.31 | 0.48 | 0.82 | 0.94 | 0.15  | 0.32 | 0.53 | 0.81 | 0.95 |
| Paludicola            | 0.20  | 0.18 | 0.46 | 0.50 | 0.99 | 0.05  | 0.72 | 0.84 | 0.93 | 1.00 | 0.04  | 0.79 | 0.47 | 0.94 | 0.94 | 0.03  | 0.83 | 0.46 | 0.95 | 0.94 | 0.04  | 0.82 | 0.52 | 0.95 | 0.95 |
| Parabacteroides       | -0.09 | 0.40 | 0.77 | 0.64 | 0.99 | -0.04 | 0.69 | 0.85 | 0.93 | 1.00 | -0.06 | 0.55 | 0.51 | 0.83 | 0.94 | -0.07 | 0.52 | 0.46 | 0.84 | 0.94 | -0.07 | 0.53 | 0.47 | 0.84 | 0.95 |
| Paraprevotella        | 0.00  | 0.97 | 0.89 | 1.00 | 0.99 | 0.02  | 0.77 | 0.86 | 0.94 | 1.00 | 0.05  | 0.54 | 0.49 | 0.83 | 0.94 | 0.04  | 0.56 | 0.50 | 0.84 | 0.94 | 0.05  | 0.54 | 0.49 | 0.84 | 0.95 |
| Parasutterella        | 0.13  | 0.12 | 0.76 | 0.44 | 0.99 | 0.13  | 0.11 | 0.94 | 0.57 | 1.00 | 0.02  | 0.78 | 0.48 | 0.94 | 0.94 | 0.03  | 0.76 | 0.49 | 0.95 | 0.94 | 0.02  | 0.77 | 0.52 | 0.95 | 0.95 |
| Peptococcus           | -0.08 | 0.56 | 0.05 | 0.72 | 0.99 | -0.16 | 0.23 | 0.03 | 0.58 | 0.88 | -0.27 | 0.06 | 0.02 | 0.53 | 0.82 | -0.28 | 0.05 | 0.02 | 0.54 | 0.80 | -0.28 | 0.05 | 0.02 | 0.54 | 0.78 |
| Phascolarctobacterium | -0.07 | 0.37 | 0.07 | 0.62 | 0.99 | -0.07 | 0.33 | 0.04 | 0.68 | 0.88 | -0.07 | 0.35 | 0.05 | 0.81 | 0.94 | -0.07 | 0.34 | 0.05 | 0.82 | 0.94 | -0.07 | 0.36 | 0.05 | 0.81 | 0.95 |
| Phocaea               | -0.38 | 0.04 | 0.28 | 0.35 | 0.99 | -0.47 | 0.01 | 0.12 | 0.30 | 1.00 | -0.52 | 0.00 | 0.11 | 0.37 | 0.94 | -0.52 | 0.00 | 0.11 | 0.37 | 0.94 | -0.52 | 0.00 | 0.11 | 0.37 | 0.95 |
| Prevotella            | -0.12 | 0.05 | 0.72 | 0.35 | 0.99 | -0.10 | 0.08 | 0.45 | 0.57 | 1.00 | -0.08 | 0.18 | 0.52 | 0.64 | 0.94 | -0.08 | 0.18 | 0.50 | 0.64 | 0.94 | -0.08 | 0.19 | 0.47 | 0.65 | 0.95 |
| Romboutsia            | 0.08  | 0.49 | 0.49 | 0.69 | 0.99 | 0.12  | 0.27 | 0.37 | 0.61 | 1.00 | 0.06  | 0.63 | 0.58 | 0.88 | 0.94 | 0.06  | 0.62 | 0.58 | 0.86 | 0.94 | 0.06  | 0.61 | 0.58 | 0.85 | 0.95 |
| Roseburia             | 0.12  | 0.45 | 0.42 | 0.67 | 0.99 | 0.03  | 0.86 | 0.76 | 0.94 | 1.00 | -0.11 | 0.51 | 0.70 | 0.83 | 0.94 | -0.10 | 0.52 | 0.71 | 0.84 | 0.94 | -0.11 | 0.51 | 0.65 | 0.84 | 0.95 |
| Ruminococcus          | 0.15  | 0.10 | 0.75 | 0.44 | 0.99 | 0.12  | 0.17 | 0.56 | 0.57 | 1.00 | 0.08  | 0.38 | 0.67 | 0.81 | 0.94 | 0.08  | 0.38 | 0.66 | 0.82 | 0.94 | 0.08  | 0.38 | 0.71 | 0.81 | 0.95 |
| Sellimonas            | 0.15  | 0.25 | 0.86 | 0.54 | 0.99 | 0.17  | 0.17 | 0.68 | 0.57 | 1.00 | 0.17  | 0.18 | 0.71 | 0.64 | 0.94 | 0.17  | 0.19 | 0.71 | 0.64 | 0.94 | 0.17  | 0.19 | 0.73 | 0.65 | 0.95 |
| Senegalimassilia      | -0.16 | 0.18 | 0.74 | 0.50 | 0.99 | -0.16 | 0.15 | 0.66 | 0.57 | 1.00 | -0.17 | 0.15 | 0.63 | 0.62 | 0.94 | -0.18 | 0.14 | 0.61 | 0.61 | 0.94 | -0.18 | 0.14 | 0.57 | 0.62 | 0.95 |
| Shuttleworthia        | 0.30  | 0.04 | 0.91 | 0.35 | 0.99 | 0.24  | 0.09 | 0.64 | 0.57 | 1.00 | 0.24  | 0.13 | 0.41 | 0.61 | 0.94 | 0.24  | 0.12 | 0.39 | 0.60 | 0.94 | 0.24  | 0.13 | 0.43 | 0.61 | 0.95 |
| Slackia               | -0.23 | 0.02 | 0.27 | 0.29 | 0.99 | -0.20 | 0.04 | 0.35 | 0.56 | 1.00 | -0.22 | 0.03 | 0.25 | 0.53 | 0.94 | -0.23 | 0.03 | 0.23 | 0.54 | 0.94 | -0.23 | 0.03 | 0.27 | 0.54 | 0.95 |
| Streptococcus         | 0.09  | 0.55 | 0.73 | 0.71 | 0.99 | 0.09  | 0.56 | 0.70 | 0.82 | 1.00 | 0.16  | 0.33 | 0.85 | 0.81 | 0.95 | 0.15  | 0.36 | 0.81 | 0.82 | 0.94 | 0.16  | 0.34 | 0.81 | 0.81 | 0.95 |
| Subdoligranulum       | 0.16  | 0.20 | 0.98 | 0.50 | 0.99 | 0.12  | 0.31 | 0.98 | 0.66 | 1.00 | 0.08  | 0.51 | 0.97 | 0.83 | 0.98 | 0.08  | 0.52 | 0.98 | 0.84 | 0.99 | 0.08  | 0.51 | 1.00 | 0.84 | 1.00 |
| Sutterella            | -0.11 | 0.11 | 0.92 | 0.44 | 0.99 | -0.08 | 0.24 | 0.96 | 0.58 | 1.00 | -0.02 | 0.77 | 0.64 | 0.94 | 0.94 | -0.02 | 0.75 | 0.66 | 0.95 | 0.94 | -0.02 | 0.78 | 0.62 | 0.95 | 0.95 |
| TM7x                  | 0.07  | 0.69 | 0.57 | 0.79 | 0.99 | 0.01  | 0.93 | 0.51 | 0.95 | 1.00 | 0.10  | 0.54 | 0.22 | 0.83 | 0.94 | 0.10  | 0.55 | 0.23 | 0.84 | 0.94 | 0.10  | 0.54 | 0.27 | 0.84 | 0.95 |
| Turicibacter          | 0.30  | 0.04 | 0.79 | 0.35 | 0.99 | 0.40  | 0.01 | 0.53 | 0.30 | 1.00 | 0.38  | 0.01 | 0.69 | 0.37 | 0.94 | 0.39  | 0.01 | 0.67 | 0.37 | 0.94 | 0.39  | 0.01 | 0.58 | 0.37 | 0.95 |
| Tuzzerella            | -0.17 | 0.15 | 0.62 | 0.49 | 0.99 | -0.16 | 0.14 | 0.46 | 0.57 | 1.00 | -0.23 | 0.06 | 0.34 | 0.53 | 0.94 | -0.23 | 0.06 | 0.35 | 0.54 | 0.94 | -0.23 | 0.06 | 0.41 | 0.54 | 0.95 |
| UBA1819               | -0.17 | 0.33 | 0.20 | 0.60 | 0.99 | -0.22 | 0.18 | 0.10 | 0.57 | 1.00 | -0.31 | 0.07 | 0.10 | 0.53 | 0.94 | -0.32 | 0.07 | 0.11 | 0.54 | 0.94 | -0.32 | 0.07 | 0.11 | 0.54 | 0.95 |
| UCG_002               | 0.07  | 0.43 | 0.52 | 0.66 | 0.99 | 0.01  | 0.87 | 0.39 | 0.94 | 1.00 | 0.00  | 0.99 | 0.58 | 0.99 | 0.94 | 0.00  | 0.98 | 0.58 | 0.94 | 0.00 | 0.98  | 0.56 | 0.99 | 0.95 |      |
| UCG_003               | 0.07  | 0.46 | 0.61 | 0.67 | 0.99 | 0.01  | 0.95 | 0.69 | 0.95 | 1.00 | -0.02 | 0.81 | 0.59 | 0.94 | 0.94 | -0.02 | 0.80 | 0.61 | 0.95 | 0.94 | -0.03 | 0.79 | 0.57 | 0.95 | 0.95 |
| UCG_005               | 0.06  | 0.55 | 0.95 | 0.71 | 0.99 | 0.02  | 0.83 | 0.97 | 0.94 | 1.00 | 0.02  | 0.89 | 0.56 | 0.96 | 0.94 | 0.01  | 0.92 | 0.56 | 0.97 | 0.94 | 0.01  | 0.90 | 0.58 | 0.97 | 0.95 |
| UCG_009               | 0.16  | 0.30 | 0.70 | 0.60 | 0.99 | 0.10  | 0.52 | 0.51 | 0.79 | 1.00 | 0.01  | 0.96 | 0.76 | 0.99 | 0.94 | 0.01  | 0.97 | 0.76 | 0.98 | 0.94 | 0.01  | 0.96 | 0.79 | 0.99 | 0.95 |
| Veillonella           | 0.13  | 0.21 | 0.92 | 0.50 | 0.99 | 0.15  | 0.15 | 0.74 | 0.57 | 1.00 | 0.15  | 0.17 | 0.63 | 0.64 | 0.94 | 0.15  | 0.18 | 0.65 | 0.64 | 0.94 | 0.15  | 0.17 | 0.67 | 0.65 | 0.95 |
| Victivallis           | 0.05  | 0.63 | 0.39 | 0.76 | 0.99 | 0.01  | 0.92 | 0.44 | 0.95 | 1.00 | -0.02 | 0.87 | 0.72 | 0.96 | 0.94 | -0.02 | 0.87 | 0.74 | 0.96 | 0.94 | -0.02 | 0.88 | 0.68 | 0.97 | 0.95 |

Multivariable-adjusted regression models adjusted for:

Model 1: sequencing batch, age, race, gender, study center

Model 2: Model 1, with education

Model 3: Model 2, with physical activity, diet score, medication use, and smoking

Model 4: Model 3 with BMI

Model 5: Model 4 with hypertension and diabetes



eTable 43: Multivariable-adjusted regression coefficients, p-values, sex interaction p-values, false discovery rate (FDR)-adjusted p-values for sex-genera interaction with respect to category fluency.

|                               | Model1 |         |           |      |         | Model2 |         |           |      |         | Model3 |         |           |      |         | Model4 |         |           |      |         | Model5 |         |           |      |         |
|-------------------------------|--------|---------|-----------|------|---------|--------|---------|-----------|------|---------|--------|---------|-----------|------|---------|--------|---------|-----------|------|---------|--------|---------|-----------|------|---------|
|                               | beta   | p-value | p-val int | FDR  | FDR-int | beta   | p-value | p-val int | FDR  | FDR-int | beta   | p-value | p-val int | FDR  | FDR-int | beta   | p-value | p-val int | FDR  | FDR-int | beta   | p-value | p-val int | FDR  | FDR-int |
| Acetanaerobacterium           | -0.16  | 0.82    | 1.00      | 0.89 | 1.00    | -0.15  | 0.82    | 0.75      | 0.91 | 0.92    | -0.39  | 0.58    | 0.48      | 0.76 | 0.69    | -0.39  | 0.58    | 0.51      | 0.76 | 0.71    | -0.44  | 0.54    | 0.50      | 0.73 | 0.71    |
| Acidaminococcus               | -0.20  | 0.31    | 0.47      | 0.55 | 0.80    | -0.09  | 0.63    | 0.48      | 0.81 | 0.72    | -0.14  | 0.50    | 0.82      | 0.70 | 0.92    | -0.14  | 0.52    | 0.84      | 0.71 | 0.94    | -0.13  | 0.55    | 0.79      | 0.73 | 0.89    |
| Actinomyces                   | 0.44   | 0.44    | 0.05      | 0.65 | 0.45    | 0.47   | 0.39    | 0.06      | 0.57 | 0.40    | 0.56   | 0.35    | 0.10      | 0.57 | 0.42    | 0.49   | 0.41    | 0.13      | 0.64 | 0.55    | 0.55   | 0.37    | 0.12      | 0.61 | 0.52    |
| Adlercreutzia                 | -0.01  | 0.97    | 0.98      | 0.97 | 1.00    | 0.02   | 0.96    | 0.77      | 0.96 | 0.92    | -0.06  | 0.86    | 0.85      | 0.89 | 0.92    | -0.04  | 0.90    | 0.76      | 0.92 | 0.88    | -0.05  | 0.89    | 0.71      | 0.93 | 0.85    |
| Agathobacter                  | 0.87   | 0.06    | 0.05      | 0.36 | 0.45    | 0.73   | 0.11    | 0.09      | 0.35 | 0.45    | 0.77   | 0.11    | 0.05      | 0.36 | 0.34    | 0.84   | 0.08    | 0.04      | 0.33 | 0.35    | 0.84   | 0.08    | 0.05      | 0.32 | 0.37    |
| Akkermansia                   | -0.22  | 0.35    | 0.14      | 0.58 | 0.56    | -0.36  | 0.11    | 0.06      | 0.35 | 0.40    | -0.44  | 0.08    | 0.06      | 0.34 | 0.38    | -0.42  | 0.09    | 0.07      | 0.33 | 0.45    | -0.43  | 0.08    | 0.08      | 0.32 | 0.45    |
| Alistipes                     | -0.01  | 0.99    | 0.80      | 0.99 | 0.94    | -0.24  | 0.55    | 0.48      | 0.73 | 0.72    | -0.42  | 0.33    | 0.47      | 0.56 | 0.68    | -0.40  | 0.35    | 0.51      | 0.59 | 0.71    | -0.46  | 0.28    | 0.44      | 0.49 | 0.66    |
| Allisonella                   | 0.09   | 0.80    | 0.83      | 0.88 | 0.96    | 0.37   | 0.31    | 0.98      | 0.54 | 0.99    | 0.33   | 0.41    | 0.85      | 0.63 | 0.92    | 0.31   | 0.43    | 0.75      | 0.64 | 0.88    | 0.30   | 0.45    | 0.64      | 0.69 | 0.79    |
| Anaerofilum                   | -0.30  | 0.55    | 0.09      | 0.71 | 0.50    | -0.49  | 0.32    | 0.13      | 0.55 | 0.55    | -0.56  | 0.29    | 0.13      | 0.51 | 0.50    | -0.57  | 0.28    | 0.14      | 0.51 | 0.55    | -0.60  | 0.26    | 0.13      | 0.47 | 0.55    |
| Anaerostipes                  | -0.54  | 0.32    | 0.27      | 0.56 | 0.71    | -0.75  | 0.15    | 0.18      | 0.38 | 0.58    | -0.67  | 0.24    | 0.34      | 0.45 | 0.68    | -0.63  | 0.27    | 0.39      | 0.49 | 0.71    | -0.64  | 0.26    | 0.37      | 0.47 | 0.66    |
| Anaerotruncus                 | -0.73  | 0.11    | 0.03      | 0.42 | 0.36    | -0.89  | 0.04    | 0.02      | 0.28 | 0.22    | -0.94  | 0.05    | 0.02      | 0.34 | 0.32    | -0.98  | 0.04    | 0.02      | 0.33 | 0.32    | -1.01  | 0.03    | 0.02      | 0.31 | 0.31    |
| Bacteroides                   | 0.29   | 0.67    | 0.34      | 0.81 | 0.72    | 0.19   | 0.78    | 0.32      | 0.90 | 0.71    | 0.20   | 0.78    | 0.32      | 0.88 | 0.68    | 0.26   | 0.71    | 0.30      | 0.82 | 0.69    | 0.25   | 0.72    | 0.33      | 0.84 | 0.66    |
| Barnesiella                   | 0.55   | 0.01    | 0.95      | 0.17 | 0.99    | 0.57   | 0.01    | 0.85      | 0.15 | 0.94    | 0.58   | 0.01    | 0.99      | 0.17 | 0.99    | 0.58   | 0.01    | 0.98      | 0.17 | 0.98    | 0.60   | 0.01    | 0.95      | 0.16 | 0.98    |
| Bifidobacterium               | 0.29   | 0.28    | 0.06      | 0.53 | 0.45    | 0.43   | 0.10    | 0.05      | 0.35 | 0.40    | 0.37   | 0.16    | 0.09      | 0.41 | 0.42    | 0.39   | 0.15    | 0.08      | 0.38 | 0.45    | 0.38   | 0.16    | 0.09      | 0.41 | 0.45    |
| Bifidophila                   | 0.84   | 0.01    | 0.27      | 0.16 | 0.71    | 0.67   | 0.02    | 0.48      | 0.28 | 0.72    | 0.69   | 0.03    | 0.46      | 0.34 | 0.68    | 0.73   | 0.02    | 0.39      | 0.30 | 0.71    | 0.75   | 0.02    | 0.33      | 0.27 | 0.66    |
| Blautia                       | -0.79  | 0.42    | 0.68      | 0.63 | 0.90    | -1.34  | 0.17    | 0.38      | 0.38 | 0.71    | -1.20  | 0.24    | 0.46      | 0.45 | 0.68    | -1.18  | 0.25    | 0.50      | 0.48 | 0.71    | -1.16  | 0.26    | 0.49      | 0.47 | 0.71    |
| Butyrivibrio                  | 0.66   | 0.37    | 0.84      | 0.58 | 0.96    | 0.18   | 0.80    | 0.99      | 0.91 | 0.99    | 0.18   | 0.81    | 0.93      | 0.88 | 0.97    | 0.21   | 0.79    | 0.90      | 0.88 | 0.96    | 0.20   | 0.80    | 0.90      | 0.89 | 0.94    |
| Butyrivibrio                  | 0.36   | 0.15    | 0.99      | 0.42 | 1.00    | 0.27   | 0.27    | 0.90      | 0.52 | 0.98    | 0.31   | 0.23    | 0.94      | 0.45 | 0.97    | 0.30   | 0.23    | 0.92      | 0.47 | 0.96    | 0.29   | 0.26    | 0.84      | 0.47 | 0.94    |
| CAG_56                        | 0.53   | 0.05    | 0.14      | 0.33 | 0.56    | 0.41   | 0.12    | 0.17      | 0.35 | 0.58    | 0.39   | 0.17    | 0.16      | 0.41 | 0.57    | 0.38   | 0.17    | 0.16      | 0.42 | 0.58    | 0.38   | 0.18    | 0.17      | 0.42 | 0.61    |
| Candidatus_Soleaferrea        | -0.67  | 0.22    | 0.10      | 0.46 | 0.54    | -0.90  | 0.09    | 0.05      | 0.34 | 0.40    | -0.97  | 0.08    | 0.03      | 0.34 | 0.34    | -0.96  | 0.08    | 0.04      | 0.33 | 0.35    | -0.98  | 0.08    | 0.04      | 0.32 | 0.34    |
| Caproiciproducens             | -1.20  | 0.02    | 0.06      | 0.18 | 0.45    | -1.27  | 0.01    | 0.03      | 0.15 | 0.36    | -1.32  | 0.01    | 0.04      | 0.17 | 0.34    | -1.32  | 0.01    | 0.04      | 0.17 | 0.35    | -1.33  | 0.01    | 0.05      | 0.16 | 0.37    |
| Christensenellaceae_R.7_group | 0.28   | 0.24    | 0.77      | 0.46 | 0.94    | 0.19   | 0.42    | 0.81      | 0.59 | 0.93    | 0.15   | 0.56    | 0.85      | 0.75 | 0.92    | 0.14   | 0.58    | 0.90      | 0.76 | 0.96    | 0.13   | 0.61    | 0.88      | 0.79 | 0.94    |
| Clostridium_sensu_stricto_1   | 0.36   | 0.21    | 0.16      | 0.46 | 0.63    | 0.44   | 0.11    | 0.09      | 0.35 | 0.45    | 0.54   | 0.07    | 0.04      | 0.34 | 0.34    | 0.54   | 0.07    | 0.04      | 0.33 | 0.35    | 0.59   | 0.05    | 0.02      | 0.31 | 0.31    |
| Colidexibacter                | -0.69  | 0.22    | 0.12      | 0.46 | 0.56    | -0.95  | 0.08    | 0.06      | 0.34 | 0.40    | -0.94  | 0.10    | 0.07      | 0.36 | 0.42    | -0.93  | 0.11    | 0.09      | 0.36 | 0.45    | -0.91  | 0.11    | 0.07      | 0.37 | 0.45    |
| Collinsella                   | 0.40   | 0.16    | 0.51      | 0.43 | 0.80    | 0.49   | 0.07    | 0.79      | 0.31 | 0.92    | 0.48   | 0.10    | 0.84      | 0.36 | 0.92    | 0.46   | 0.11    | 0.92      | 0.36 | 0.96    | 0.45   | 0.12    | 0.90      | 0.38 | 0.94    |
| Coprobacter                   | 0.51   | 0.07    | 0.36      | 0.38 | 0.72    | 0.44   | 0.11    | 0.31      | 0.35 | 0.71    | 0.39   | 0.17    | 0.23      | 0.41 | 0.64    | 0.39   | 0.18    | 0.22      | 0.42 | 0.67    | 0.38   | 0.19    | 0.22      | 0.44 | 0.65    |
| Coprococcus                   | 0.55   | 0.10    | 0.12      | 0.42 | 0.56    | 0.35   | 0.29    | 0.37      | 0.54 | 0.71    | 0.37   | 0.29    | 0.31      | 0.51 | 0.68    | 0.36   | 0.30    | 0.33      | 0.53 | 0.71    | 0.33   | 0.35    | 0.43      | 0.58 | 0.66    |
| Defluviitaleaceae_UCG.011     | -0.19  | 0.69    | 0.09      | 0.82 | 0.50    | -0.17  | 0.70    | 0.15      | 0.85 | 0.58    | -0.13  | 0.79    | 0.18      | 0.88 | 0.61    | -0.13  | 0.79    | 0.20      | 0.88 | 0.65    | -0.14  | 0.77    | 0.22      | 0.86 | 0.65    |
| Desulfobivrio                 | -0.32  | 0.19    | 0.34      | 0.46 | 0.72    | -0.30  | 0.20    | 0.32      | 0.43 | 0.71    | -0.40  | 0.12    | 0.24      | 0.36 | 0.64    | -0.46  | 0.08    | 0.20      | 0.33 | 0.65    | -0.48  | 0.07    | 0.18      | 0.32 | 0.61    |
| Dialister                     | -0.07  | 0.73    | 0.95      | 0.83 | 0.99    | -0.06  | 0.78    | 0.98      | 0.90 | 0.99    | -0.09  | 0.66    | 0.71      | 0.82 | 0.86    | -0.08  | 0.70    | 0.74      | 0.82 | 0.88    | -0.07  | 0.74    | 0.72      | 0.85 | 0.85    |
| DNF0809                       | -0.62  | 0.23    | 0.31      | 0.46 | 0.71    | -0.72  | 0.16    | 0.26      | 0.38 | 0.71    | -0.61  | 0.26    | 0.41      | 0.47 | 0.68    | -0.66  | 0.23    | 0.39      | 0.46 | 0.71    | -0.65  | 0.24    | 0.41      | 0.47 | 0.66    |
| Dorea                         | 0.32   | 0.46    | 0.27      | 0.65 | 0.71    | 0.22   | 0.60    | 0.50      | 0.78 | 0.73    | 0.17   | 0.70    | 0.53      | 0.83 | 0.73    | 0.16   | 0.71    | 0.57      | 0.82 | 0.77    | 0.16   | 0.71    | 0.54      | 0.84 | 0.74    |
| DTU089                        | -0.54  | 0.20    | 0.67      | 0.46 | 0.90    | -0.56  | 0.16    | 0.73      | 0.38 | 0.92    | -0.69  | 0.11    | 0.53      | 0.36 | 0.73    | -0.74  | 0.09    | 0.49      | 0.33 | 0.71    | -0.73  | 0.09    | 0.43      | 0.33 | 0.66    |
| Eggerthella                   | -0.64  | 0.11    | 0.37      | 0.42 | 0.72    | -0.75  | 0.05    | 0.24      | 0.28 | 0.70    | -0.72  | 0.08    | 0.25      | 0.34 | 0.64    | -0.73  | 0.08    | 0.25      | 0.33 | 0.67    | -0.74  | 0.07    | 0.21      | 0.32 | 0.65    |
| Eisenbergiella                | -1.02  | 0.01    | 0.02      | 0.17 | 0.27    | -1.03  | 0.01    | 0.01      | 0.15 | 0.22    | -1.23  | 0.00    | 0.01      | 0.14 | 0.13    | -1.26  | 0.00    | 0.01      | 0.11 | 0.15    | -1.27  | 0.00    | 0.01      | 0.10 | 0.12    |
| Erysipelatoclostridium        | -0.81  | 0.04    | 0.19      | 0.32 | 0.67    | -0.77  | 0.05    | 0.21      | 0.28 | 0.62    | -0.73  | 0.08    | 0.25      | 0.34 | 0.64    | -0.75  | 0.07    | 0.27      | 0.33 | 0.68    | -0.74  | 0.07    | 0.26      | 0.32 | 0.66    |
| Erysipelotrichaceae_UCG.003   | 0.41   | 0.18    | 0.27      | 0.46 | 0.71    | 0.37   | 0.22    | 0.29      | 0.45 | 0.71    | 0.32   | 0.31    | 0.41      | 0.54 | 0.68    | 0.33   | 0.29    | 0.36      | 0.51 | 0.71    | 0.33   | 0.30    | 0.33      | 0.51 | 0.66    |
| Escherichia_Shigella          | -0.34  | 0.22    | 0.70      | 0.46 | 0.90    | -0.20  | 0.46    | 0.84      | 0.65 | 0.94    | -0.24  | 0.42    | 0.51      | 0.63 | 0.72    | -0.23  | 0.43    | 0.51      | 0.64 | 0.71    | -0.26  | 0.39    | 0.43      | 0.62 | 0.66    |
| Faecalibacterium              | 0.43   | 0.37    | 0.52      | 0.58 | 0.80    | 0.44   | 0.34    | 0.33      | 0.55 | 0.71    | 0.77   | 0.13    | 0.09      | 0.39 | 0.42    | 0.77   | 0.13    | 0.09      | 0.38 | 0.45    | 0.75   | 0.14    | 0.10      | 0.39 | 0.45    |
| Family_XIII_AD3011_group      | 0.24   | 0.54    | 0.93      | 0.71 | 0.99    | -0.06  | 0.87    | 0.74      | 0.92 | 0.92    | -0.12  | 0.78    | 0.84      | 0.88 | 0.92    | -0.16  | 0.70    | 0.83      | 0.82 | 0.93    | -0.19  | 0.65    | 0.85      | 0.79 | 0.94    |
| Family_XIII_UCG.001           | 0.20   | 0.66    | 0.30      | 0.80 | 0.71    | 0.06   | 0.89    | 0.26      | 0.92 | 0.71    | -0.02  | 0.97    | 0.30      | 0.97 | 0.68    | -0.06  | 0.90    | 0.30      | 0.92 | 0.69    | -0.07  | 0.89    | 0.32      | 0.93 | 0.66    |
| FD2005                        | -0.63  | 0.12    | 0.14      | 0.42 | 0.56    | -0.54  | 0.17    | 0.12      | 0.38 | 0.55    | -0.60  | 0.15    | 0.09      | 0.41 | 0.42    | -0.57  | 0.18    | 0.10      | 0.42 | 0.48    | -0.59  | 0.17    | 0.08      | 0.42 | 0.45    |
| Flavonifractor                | -0.32  | 0.37    | 0.76      | 0.58 | 0.94    | -0.31  | 0.37    | 0.77      | 0.55 | 0.92    | -0.28  | 0.46    | 0.87      | 0.66 | 0.93    | -0.27  | 0.46    | 0.88      | 0.66 | 0.96    | -0.26  | 0.48    | 0.89      | 0.70 | 0.94    |
| Fourmiella                    | -0.06  | 0.87    | 0.82      | 0.92 | 0.95    | -0.08  | 0.84    | 0.75      | 0.92 | 0.92    | -0.16  | 0.70    | 0.84      | 0.83 | 0.92    | -0.18  | 0.67    | 0.81      | 0.82 | 0.92    | -0.19  | 0.63    | 0.90      | 0.79 | 0.94    |
| Frisingicoccus                | -0.38  | 0.28    | 0.06      | 0.53 | 0.45    | -0.31  | 0.37    | 0.15      | 0.55 | 0.58    | -0.31  | 0.39    | 0.25      | 0.63 | 0.64    | -0.31  | 0.40    | 0.29      | 0.64 | 0.69    | -0.31  | 0.40    | 0.28      | 0.63 | 0.66    |
| Fusicatenibacter              | 0.52   | 0.14    | 0.58      | 0.42 | 0.87    | 0.48   | 0.17    | 0.48      | 0.38 | 0.72    | 0.52   | 0.15    | 0.27      | 0.41 | 0.64    | 0.55   | 0.13    | 0.26      | 0.38 | 0.68    | 0.54   | 0.14    | 0.22      | 0.39 | 0.65    |
| Fusobacterium                 | -0.25  | 0.51    | 0.72      | 0.70 | 0.92    | -0.13  | 0.71    | 0.67      | 0.86 | 0.88    | -0.05  | 0.90    | 0.44      | 0.92 | 0.68    | -0.07  | 0.86    | 0.45      | 0.91 | 0.71    | -0.08  | 0.83    | 0.38      | 0.90 | 0.66    |
| GCA_900066575                 | 0.55   | 0.19    | 0.48      | 0.46 | 0.80    | 0.37   | 0.35    | 0.44      | 0.55 | 0.72    | 0.35   | 0.41    | 0.47      | 0.63 | 0.68    | 0.34   | 0.42    | 0.42      | 0.64 | 0.71    | 0.30   | 0.48    | 0.43      | 0.70 | 0.66    |
| Gordonibacter                 | -0.30  | 0.52    | 0.17      | 0.70 | 0.63    | -0.43  | 0.34    | 0.13      | 0.55 | 0.55    | -0.26  | 0.58    | 0.21      | 0.76 | 0.64    | -0.29  | 0.54    | 0.23      | 0.73 | 0.67    | -0.30  | 0.53    | 0.24      | 0.73 | 0.66    |
| Granulicatella                | -0.12  | 0.85    | 0.90      | 0.92 | 0.99    | 0.92   | 0.98    | 0.93      | 0.98 | 0.99    | 0.13   | 0.83    | 0.82      | 0.89 | 0.92    | 0.09   | 0.89    | 0.91      | 0.92 | 0.96    | 0.12   | 0.85    | 0.98      | 0.90 | 0.99    |

|                       |       |      |      |      |      |       |      |      |      |      |       |      |      |      |      |       |      |      |      |       |       |      |      |      |      |
|-----------------------|-------|------|------|------|------|-------|------|------|------|------|-------|------|------|------|------|-------|------|------|------|-------|-------|------|------|------|------|
| Monoglobus            | 0.34  | 0.35 | 0.40 | 0.58 | 0.72 | 0.22  | 0.52 | 0.36 | 0.72 | 0.71 | 0.12  | 0.76 | 0.39 | 0.88 | 0.68 | 0.12  | 0.76 | 0.41 | 0.87 | 0.71  | 0.13  | 0.74 | 0.45 | 0.85 | 0.66 |
| Moryella              | 0.88  | 0.08 | 0.44 | 0.39 | 0.78 | 0.73  | 0.13 | 0.36 | 0.35 | 0.71 | 0.65  | 0.20 | 0.34 | 0.44 | 0.68 | 0.64  | 0.21 | 0.36 | 0.46 | 0.71  | 0.63  | 0.22 | 0.37 | 0.46 | 0.66 |
| Negativibacillus      | -0.45 | 0.19 | 0.19 | 0.46 | 0.67 | -0.54 | 0.10 | 0.07 | 0.35 | 0.40 | -0.66 | 0.06 | 0.04 | 0.34 | 0.34 | -0.65 | 0.07 | 0.05 | 0.33 | 0.35  | -0.66 | 0.06 | 0.05 | 0.32 | 0.37 |
| NK4A214_group         | -0.13 | 0.60 | 0.08 | 0.75 | 0.50 | -0.28 | 0.27 | 0.04 | 0.52 | 0.40 | -0.39 | 0.15 | 0.05 | 0.41 | 0.34 | -0.40 | 0.14 | 0.05 | 0.38 | 0.35  | -0.43 | 0.11 | 0.04 | 0.37 | 0.34 |
| Odoribacter           | 0.50  | 0.05 | 0.39 | 0.33 | 0.72 | 0.48  | 0.05 | 0.28 | 0.28 | 0.71 | 0.42  | 0.12 | 0.27 | 0.36 | 0.64 | 0.42  | 0.12 | 0.25 | 0.36 | 0.67  | 0.41  | 0.13 | 0.25 | 0.39 | 0.66 |
| Oscilibacter          | -0.03 | 0.95 | 0.40 | 0.97 | 0.72 | -0.11 | 0.78 | 0.40 | 0.90 | 0.71 | -0.08 | 0.85 | 0.37 | 0.89 | 0.68 | -0.11 | 0.81 | 0.39 | 0.89 | 0.71  | -0.10 | 0.83 | 0.45 | 0.90 | 0.66 |
| Oscilospira           | -0.19 | 0.76 | 0.79 | 0.84 | 0.94 | -0.27 | 0.65 | 0.96 | 0.82 | 0.99 | -0.36 | 0.56 | 0.79 | 0.75 | 0.92 | -0.37 | 0.54 | 0.79 | 0.73 | 0.91  | -0.36 | 0.56 | 0.77 | 0.74 | 0.89 |
| Oxalobacter           | 0.69  | 0.10 | 0.63 | 0.42 | 0.90 | 0.45  | 0.27 | 0.58 | 0.52 | 0.81 | 0.35  | 0.42 | 0.71 | 0.63 | 0.86 | 0.35  | 0.43 | 0.71 | 0.64 | 0.86  | 0.30  | 0.50 | 0.76 | 0.70 | 0.89 |
| Paludicola            | -0.26 | 0.54 | 0.43 | 0.71 | 0.76 | -0.63 | 0.13 | 0.19 | 0.35 | 0.59 | -0.87 | 0.05 | 0.13 | 0.34 | 0.50 | -0.92 | 0.04 | 0.14 | 0.33 | 0.55  | -0.93 | 0.04 | 0.14 | 0.31 | 0.55 |
| Parabacteroides       | 0.45  | 0.14 | 0.50 | 0.42 | 0.80 | 0.57  | 0.05 | 0.43 | 0.28 | 0.72 | 0.65  | 0.04 | 0.27 | 0.34 | 0.64 | 0.62  | 0.05 | 0.34 | 0.33 | 0.71  | 0.62  | 0.05 | 0.38 | 0.31 | 0.66 |
| Paraprevotella        | 0.07  | 0.76 | 0.38 | 0.84 | 0.72 | 0.12  | 0.55 | 0.36 | 0.73 | 0.71 | 0.10  | 0.65 | 0.42 | 0.82 | 0.68 | 0.08  | 0.71 | 0.46 | 0.82 | 0.71  | 0.11  | 0.63 | 0.40 | 0.79 | 0.66 |
| Parasutterella        | 0.58  | 0.01 | 0.26 | 0.17 | 0.71 | 0.58  | 0.01 | 0.18 | 0.16 | 0.58 | 0.50  | 0.04 | 0.26 | 0.34 | 0.64 | 0.52  | 0.04 | 0.25 | 0.33 | 0.67  | 0.50  | 0.04 | 0.21 | 0.31 | 0.65 |
| Peptococcus           | -0.55 | 0.18 | 0.01 | 0.46 | 0.27 | -0.75 | 0.06 | 0.01 | 0.29 | 0.17 | -0.79 | 0.06 | 0.02 | 0.34 | 0.32 | -0.82 | 0.05 | 0.02 | 0.33 | 0.32  | -0.84 | 0.05 | 0.02 | 0.31 | 0.31 |
| Phascolarctobacterium | 0.27  | 0.21 | 0.74 | 0.46 | 0.93 | 0.26  | 0.21 | 0.85 | 0.43 | 0.94 | 0.31  | 0.17 | 0.74 | 0.41 | 0.89 | 0.30  | 0.18 | 0.74 | 0.42 | 0.88  | 0.28  | 0.21 | 0.78 | 0.46 | 0.89 |
| Phocaea               | -0.85 | 0.11 | 0.53 | 0.42 | 0.80 | -1.05 | 0.04 | 0.33 | 0.28 | 0.71 | -1.40 | 0.01 | 0.11 | 0.17 | 0.49 | -1.39 | 0.01 | 0.11 | 0.17 | 0.48  | -1.38 | 0.01 | 0.09 | 0.16 | 0.45 |
| Prevotella            | 0.06  | 0.72 | 0.92 | 0.83 | 0.99 | 0.11  | 0.54 | 0.83 | 0.73 | 0.94 | 0.08  | 0.68 | 0.70 | 0.82 | 0.86 | 0.07  | 0.71 | 0.66 | 0.82 | 0.84  | 0.07  | 0.72 | 0.63 | 0.84 | 0.79 |
| Romboutsia            | 0.42  | 0.21 | 0.48 | 0.46 | 0.80 | 0.52  | 0.11 | 0.39 | 0.35 | 0.71 | 0.43  | 0.22 | 0.46 | 0.44 | 0.68 | 0.45  | 0.20 | 0.45 | 0.43 | 0.71  | 0.48  | 0.17 | 0.40 | 0.42 | 0.66 |
| Roseburia             | 1.18  | 0.01 | 0.02 | 0.16 | 0.30 | 0.97  | 0.02 | 0.06 | 0.28 | 0.40 | 0.67  | 0.16 | 0.20 | 0.41 | 0.64 | 0.69  | 0.15 | 0.19 | 0.38 | 0.65  | 0.69  | 0.15 | 0.23 | 0.39 | 0.66 |
| Ruminococcus          | 0.43  | 0.11 | 0.95 | 0.42 | 0.99 | 0.35  | 0.18 | 0.79 | 0.39 | 0.92 | 0.30  | 0.29 | 0.66 | 0.51 | 0.83 | 0.30  | 0.29 | 0.63 | 0.51 | 0.81  | 0.30  | 0.29 | 0.58 | 0.49 | 0.77 |
| Sellimonas            | 0.35  | 0.34 | 0.97 | 0.58 | 1.00 | 0.40  | 0.26 | 0.59 | 0.52 | 0.82 | 0.45  | 0.23 | 0.42 | 0.45 | 0.68 | 0.43  | 0.25 | 0.40 | 0.48 | 0.71  | 0.44  | 0.24 | 0.38 | 0.47 | 0.66 |
| Senegalimassilia      | 0.48  | 0.15 | 0.38 | 0.42 | 0.72 | 0.47  | 0.14 | 0.41 | 0.37 | 0.72 | 0.54  | 0.12 | 0.33 | 0.36 | 0.68 | 0.51  | 0.14 | 0.38 | 0.38 | 0.71  | 0.51  | 0.14 | 0.37 | 0.39 | 0.66 |
| Shuttleworthia        | -0.25 | 0.56 | 0.24 | 0.72 | 0.71 | -0.41 | 0.33 | 0.36 | 0.55 | 0.71 | -0.61 | 0.18 | 0.24 | 0.42 | 0.64 | -0.59 | 0.19 | 0.29 | 0.43 | 0.69  | -0.56 | 0.22 | 0.31 | 0.46 | 0.66 |
| Slackia               | -0.04 | 0.89 | 0.79 | 0.92 | 0.94 | 0.04  | 0.88 | 0.65 | 0.92 | 0.88 | 0.09  | 0.78 | 0.59 | 0.88 | 0.80 | 0.06  | 0.84 | 0.69 | 0.91 | 0.85  | 0.03  | 0.91 | 0.65 | 0.93 | 0.79 |
| Streptococcus         | 0.46  | 0.31 | 0.49 | 0.55 | 0.80 | 0.45  | 0.31 | 0.48 | 0.55 | 0.72 | 0.62  | 0.20 | 0.40 | 0.44 | 0.68 | 0.56  | 0.26 | 0.49 | 0.48 | 0.71  | 0.60  | 0.22 | 0.45 | 0.46 | 0.66 |
| Subdoligranulum       | 0.77  | 0.03 | 0.94 | 0.24 | 0.99 | 0.68  | 0.04 | 0.97 | 0.28 | 0.99 | 0.56  | 0.12 | 0.99 | 0.36 | 0.99 | 0.54  | 0.13 | 0.96 | 0.38 | 0.98  | 0.53  | 0.14 | 0.88 | 0.39 | 0.94 |
| Sutterella            | 0.09  | 0.65 | 0.29 | 0.80 | 0.71 | 0.17  | 0.39 | 0.33 | 0.57 | 0.71 | 0.27  | 0.20 | 0.12 | 0.44 | 0.50 | 0.26  | 0.22 | 0.14 | 0.46 | 0.55  | 0.27  | 0.20 | 0.14 | 0.45 | 0.55 |
| TM7x                  | 0.08  | 0.86 | 0.52 | 0.92 | 0.80 | -0.04 | 0.93 | 0.47 | 0.94 | 0.72 | 0.12  | 0.81 | 0.38 | 0.88 | 0.68 | 0.10  | 0.84 | 0.40 | 0.91 | 0.71  | 0.10  | 0.84 | 0.43 | 0.90 | 0.66 |
| Turicibacter          | 1.35  | 0.00 | 0.00 | 0.09 | 0.27 | 1.58  | 0.00 | 0.00 | 0.01 | 0.09 | 1.60  | 0.00 | 0.00 | 0.02 | 0.13 | 1.63  | 0.00 | 0.00 | 0.02 | 0.15  | 1.66  | 0.00 | 0.00 | 0.02 | 0.09 |
| Tuzzerella            | 0.05  | 0.89 | 0.69 | 0.92 | 0.90 | 0.06  | 0.87 | 0.55 | 0.92 | 0.78 | -0.07 | 0.85 | 0.42 | 0.89 | 0.68 | -0.06 | 0.87 | 0.46 | 0.92 | 0.71  | -0.04 | 0.90 | 0.51 | 0.93 | 0.71 |
| UBA1819               | -1.13 | 0.02 | 0.02 | 0.21 | 0.27 | -1.26 | 0.01 | 0.01 | 0.15 | 0.17 | -1.30 | 0.01 | 0.01 | 0.17 | 0.13 | -1.35 | 0.01 | 0.01 | 0.17 | 0.15  | -1.35 | 0.01 | 0.00 | 0.16 | 0.12 |
| UCG_002               | -0.09 | 0.73 | 0.26 | 0.83 | 0.71 | -0.23 | 0.36 | 0.19 | 0.55 | 0.59 | -0.25 | 0.35 | 0.33 | 0.57 | 0.68 | -0.27 | 0.32 | 0.33 | 0.54 | 0.71  | -0.30 | 0.27 | 0.28 | 0.49 | 0.66 |
| UCG_003               | 0.41  | 0.13 | 0.63 | 0.42 | 0.90 | 0.26  | 0.33 | 0.71 | 0.55 | 0.91 | 0.21  | 0.47 | 0.65 | 0.66 | 0.83 | 0.19  | 0.50 | 0.69 | 0.70 | 0.85  | 0.18  | 0.53 | 0.65 | 0.73 | 0.79 |
| UCG_005               | 0.22  | 0.46 | 0.50 | 0.65 | 0.80 | 0.13  | 0.66 | 0.53 | 0.84 | 0.77 | 0.04  | 0.90 | 0.61 | 0.92 | 0.82 | 0.01  | 0.96 | 0.61 | 0.96 | 0.80  | 0.00  | 1.00 | 0.63 | 1.00 | 0.79 |
| UCG_009               | -0.29 | 0.52 | 0.37 | 0.70 | 0.72 | -0.45 | 0.30 | 0.49 | 0.54 | 0.72 | -0.59 | 0.20 | 0.44 | 0.44 | 0.68 | -0.61 | 0.19 | 0.44 | 0.71 | -0.64 | 0.17  | 0.42 | 0.42 | 0.66 | 0.66 |
| Veillonella           | 0.59  | 0.06 | 0.03 | 0.33 | 0.36 | 0.62  | 0.04 | 0.02 | 0.28 | 0.22 | 0.61  | 0.06 | 0.02 | 0.34 | 0.32 | 0.61  | 0.06 | 0.02 | 0.33 | 0.32  | 0.62  | 0.06 | 0.03 | 0.31 | 0.33 |
| Victivallis           | 0.21  | 0.48 | 0.86 | 0.66 | 0.96 | 0.12  | 0.68 | 0.94 | 0.84 | 0.99 | 0.02  | 0.94 | 0.92 | 0.95 | 0.97 | 0.02  | 0.94 | 0.85 | 0.95 | 0.94  | 0.02  | 0.95 | 0.89 | 0.96 | 0.94 |

Multivariable-adjusted regression models adjusted for:

Model 1: sequencing batch, age, race, gender, study center

Model 2: Model 1, with education

Model 3: Model 2, with physical activity, diet score, medication use, and smoking

Model 4: Model 3 with BMI

Model 5: Model 4 with hypertension and diabetes

eTable 44: Multivariable-adjusted regression coefficients, p-values, sex interaction p-values, false discovery rate (FDR)-adjusted p-values for sex-genera interaction with respect to letter fluency.

|                               | Model1 |         |           |      |         | Model2 |         |           |      |         | Model3 |         |           |      |         | Model4 |         |           |      |         | Model5 |         |           |      |         |
|-------------------------------|--------|---------|-----------|------|---------|--------|---------|-----------|------|---------|--------|---------|-----------|------|---------|--------|---------|-----------|------|---------|--------|---------|-----------|------|---------|
|                               | beta   | p-value | p-val Int | FDR  | FDR-int | beta   | p-value | p-val Int | FDR  | FDR-int | beta   | p-value | p-val Int | FDR  | FDR-int | beta   | p-value | p-val Int | FDR  | FDR-int | beta   | p-value | p-val Int | FDR  | FDR-int |
| Acetanaerobacterium           | 1.50   | 0.38    | 0.42      | 0.89 | 0.94    | 1.49   | 0.38    | 0.60      | 0.95 | 0.91    | 1.33   | 0.45    | 0.74      | 0.98 | 0.98    | 1.33   | 0.45    | 0.72      | 0.97 | 0.95    | 1.33   | 0.45    | 0.66      | 0.98 | 0.98    |
| Acidaminococcus               | -0.94  | 0.06    | 0.49      | 0.55 | 0.94    | -0.69  | 0.15    | 0.47      | 0.95 | 0.91    | -0.59  | 0.25    | 0.43      | 0.98 | 0.95    | -0.59  | 0.26    | 0.42      | 0.97 | 0.94    | -0.57  | 0.27    | 0.44      | 0.98 | 0.93    |
| Actinomycetes                 | 1.06   | 0.45    | 0.28      | 0.89 | 0.94    | 1.12   | 0.42    | 0.33      | 0.95 | 0.91    | 0.80   | 0.59    | 0.90      | 0.98 | 0.98    | 0.69   | 0.64    | 0.97      | 0.97 | 1.00    | 0.73   | 0.63    | 0.97      | 0.98 | 1.00    |
| Adlercreutzia                 | -0.59  | 0.46    | 0.82      | 0.89 | 0.94    | -0.53  | 0.50    | 0.61      | 0.95 | 0.92    | -0.43  | 0.60    | 0.44      | 0.98 | 0.95    | -0.40  | 0.63    | 0.39      | 0.97 | 0.94    | -0.41  | 0.62    | 0.36      | 0.98 | 0.92    |
| Agathobacter                  | 0.75   | 0.54    | 0.55      | 0.89 | 0.94    | 0.44   | 0.72    | 0.73      | 0.95 | 0.93    | 0.07   | 0.96    | 0.76      | 0.98 | 0.98    | 0.14   | 0.91    | 0.74      | 0.97 | 0.95    | 0.10   | 0.93    | 0.83      | 0.98 | 0.98    |
| Akkermansia                   | -0.23  | 0.69    | 0.51      | 0.92 | 0.94    | -0.56  | 0.31    | 0.33      | 0.95 | 0.91    | -0.65  | 0.27    | 0.37      | 0.98 | 0.95    | -0.63  | 0.29    | 0.40      | 0.97 | 0.94    | -0.66  | 0.27    | 0.42      | 0.98 | 0.93    |
| Alistipes                     | 1.76   | 0.08    | 0.24      | 0.58 | 0.94    | 1.24   | 0.21    | 0.43      | 0.95 | 0.91    | 0.85   | 0.42    | 0.43      | 0.98 | 0.95    | 0.88   | 0.40    | 0.41      | 0.97 | 0.94    | 0.84   | 0.42    | 0.41      | 0.98 | 0.93    |
| Allisonella                   | -0.19  | 0.83    | 0.63      | 0.94 | 0.94    | 0.44   | 0.62    | 0.47      | 0.95 | 0.91    | 0.71   | 0.46    | 0.61      | 0.98 | 0.95    | 0.68   | 0.48    | 0.55      | 0.97 | 0.95    | 0.72   | 0.46    | 0.52      | 0.98 | 0.93    |
| Anaerofilum                   | 0.49   | 0.70    | 0.79      | 0.92 | 0.94    | 0.06   | 0.96    | 0.96      | 0.97 | 0.98    | 0.25   | 0.85    | 0.83      | 0.98 | 0.98    | 0.25   | 0.85    | 0.80      | 0.97 | 0.95    | 0.23   | 0.86    | 0.76      | 0.98 | 0.98    |
| Anaerostipes                  | 1.29   | 0.35    | 0.09      | 0.89 | 0.90    | 0.83   | 0.54    | 0.12      | 0.95 | 0.91    | 1.93   | 0.18    | 0.03      | 0.98 | 0.54    | 2.00   | 0.16    | 0.03      | 0.97 | 0.52    | 1.93   | 0.18    | 0.04      | 0.98 | 0.57    |
| Anaerotruncus                 | -0.66  | 0.56    | 0.59      | 0.89 | 0.94    | -1.07  | 0.34    | 0.43      | 0.95 | 0.91    | -0.70  | 0.55    | 0.71      | 0.98 | 0.98    | -0.76  | 0.51    | 0.72      | 0.97 | 0.95    | -0.81  | 0.49    | 0.71      | 0.98 | 0.98    |
| Bacteroides                   | 1.46   | 0.40    | 0.25      | 0.89 | 0.94    | 1.21   | 0.47    | 0.23      | 0.95 | 0.91    | 1.27   | 0.46    | 0.20      | 0.98 | 0.88    | 1.36   | 0.43    | 0.20      | 0.97 | 0.88    | 1.36   | 0.43    | 0.19      | 0.98 | 0.84    |
| Barnesiella                   | 1.14   | 0.03    | 0.77      | 0.48 | 0.94    | 1.19   | 0.02    | 0.70      | 0.71 | 0.93    | 0.79   | 0.14    | 0.78      | 0.98 | 0.98    | 0.79   | 0.14    | 0.78      | 0.97 | 0.95    | 0.81   | 0.13    | 0.78      | 0.98 | 0.98    |
| Bifidobacterium               | -0.09  | 0.89    | 0.99      | 0.95 | 1.00    | 0.24   | 0.71    | 0.99      | 0.95 | 0.99    | 0.01   | 0.99    | 0.74      | 0.99 | 0.98    | 0.03   | 0.97    | 0.74      | 0.98 | 0.95    | 0.00   | 1.00    | 0.72      | 1.00 | 0.98    |
| Blifilphia                    | 0.86   | 0.25    | 0.77      | 0.89 | 0.94    | 0.47   | 0.52    | 0.50      | 0.95 | 0.91    | 0.83   | 0.29    | 0.98      | 0.98 | 0.99    | 0.88   | 0.26    | 0.97      | 0.97 | 1.00    | 0.89   | 0.26    | 0.87      | 0.98 | 0.98    |
| Blautia                       | 0.52   | 0.83    | 0.17      | 0.94 | 0.94    | -0.70  | 0.77    | 0.31      | 0.95 | 0.91    | 0.15   | 0.95    | 0.22      | 0.98 | 0.88    | 0.18   | 0.94    | 0.20      | 0.98 | 0.88    | 0.14   | 0.95    | 0.25      | 0.98 | 0.84    |
| Butyrivibrio                  | 1.50   | 0.41    | 0.37      | 0.89 | 0.94    | 0.39   | 0.83    | 0.47      | 0.95 | 0.91    | 0.67   | 0.72    | 0.22      | 0.98 | 0.88    | 0.71   | 0.70    | 0.21      | 0.97 | 0.88    | 0.64   | 0.73    | 0.24      | 0.98 | 0.84    |
| Butyrivibrio                  | 0.30   | 0.63    | 0.67      | 0.92 | 0.94    | 0.09   | 0.88    | 0.55      | 0.96 | 0.91    | 0.07   | 0.91    | 0.58      | 0.98 | 0.95    | 0.07   | 0.91    | 0.57      | 0.97 | 0.95    | 0.03   | 0.96    | 0.54      | 0.98 | 0.93    |
| CAG_56                        | 0.31   | 0.64    | 0.86      | 0.92 | 0.95    | 0.05   | 0.94    | 0.72      | 0.97 | 0.93    | -0.04  | 0.95    | 0.53      | 0.98 | 0.95    | -0.04  | 0.95    | 0.52      | 0.98 | 0.95    | -0.05  | 0.94    | 0.51      | 0.98 | 0.93    |
| Candidatus_Soleaferrea        | 0.55   | 0.68    | 0.40      | 0.92 | 0.94    | 0.01   | 0.99    | 0.55      | 0.99 | 0.91    | 0.33   | 0.81    | 0.50      | 0.98 | 0.95    | 0.34   | 0.80    | 0.48      | 0.97 | 0.95    | 0.31   | 0.82    | 0.46      | 0.98 | 0.93    |
| Caproiciproducens             | 1.42   | 0.25    | 0.32      | 0.89 | 0.94    | 1.27   | 0.29    | 0.40      | 0.95 | 0.91    | 1.12   | 0.37    | 0.29      | 0.98 | 0.95    | 1.13   | 0.37    | 0.28      | 0.97 | 0.94    | 1.14   | 0.37    | 0.24      | 0.98 | 0.84    |
| Christensenellaceae_R.7_group | 0.39   | 0.51    | 0.71      | 0.89 | 0.94    | 0.18   | 0.75    | 0.74      | 0.95 | 0.93    | 0.01   | 0.99    | 0.92      | 0.99 | 0.98    | 0.00   | 1.00    | 0.95      | 1.00 | 1.00    | 0.00   | 1.00    | 0.97      | 1.00 | 1.00    |
| Clostridium_sensu_stricto_1   | 0.64   | 0.36    | 0.39      | 0.89 | 0.94    | 0.84   | 0.22    | 0.27      | 0.95 | 0.91    | 0.98   | 0.17    | 0.21      | 0.98 | 0.88    | 0.98   | 0.17    | 0.21      | 0.97 | 0.88    | 0.99   | 0.17    | 0.14      | 0.98 | 0.84    |
| Colidextribacter              | -0.26  | 0.85    | 0.56      | 0.94 | 0.94    | -0.85  | 0.53    | 0.39      | 0.95 | 0.91    | -0.81  | 0.57    | 0.69      | 0.98 | 0.98    | -0.79  | 0.57    | 0.72      | 0.97 | 0.95    | -0.85  | 0.54    | 0.60      | 0.98 | 0.95    |
| Collinsella                   | 0.54   | 0.43    | 0.15      | 0.89 | 0.94    | 0.74   | 0.27    | 0.27      | 0.95 | 0.91    | 0.76   | 0.28    | 0.20      | 0.98 | 0.88    | 0.75   | 0.29    | 0.22      | 0.97 | 0.88    | 0.77   | 0.28    | 0.17      | 0.98 | 0.84    |
| Coprobacter                   | 1.87   | 0.01    | 0.06      | 0.45 | 0.90    | 1.71   | 0.01    | 0.04      | 0.71 | 0.91    | 1.48   | 0.03    | 0.03      | 0.89 | 0.54    | 1.47   | 0.04    | 0.03      | 0.91 | 0.52    | 1.49   | 0.03    | 0.02      | 0.91 | 0.57    |
| Coprococcus                   | 2.02   | 0.02    | 0.06      | 0.48 | 0.90    | 1.57   | 0.05    | 0.20      | 0.80 | 0.91    | 1.54   | 0.07    | 0.21      | 0.89 | 0.88    | 1.53   | 0.07    | 0.22      | 0.91 | 0.88    | 1.47   | 0.08    | 0.26      | 0.91 | 0.84    |
| Defluviitaleaceae_UCG.011     | 0.65   | 0.57    | 0.74      | 0.89 | 0.94    | 0.67   | 0.55    | 0.51      | 0.95 | 0.91    | 1.04   | 0.38    | 0.29      | 0.98 | 0.95    | 1.05   | 0.38    | 0.27      | 0.97 | 0.94    | 1.03   | 0.38    | 0.22      | 0.98 | 0.84    |
| Desulfotomaculum              | -0.23  | 0.70    | 0.91      | 0.92 | 0.96    | -0.19  | 0.74    | 0.86      | 0.95 | 0.96    | -0.29  | 0.65    | 0.84      | 0.98 | 0.98    | -0.35  | 0.58    | 0.80      | 0.97 | 0.95    | -0.35  | 0.58    | 0.78      | 0.98 | 0.98    |
| Dialister                     | -0.14  | 0.78    | 0.55      | 0.94 | 0.94    | -0.11  | 0.83    | 0.52      | 0.95 | 0.91    | 0.23   | 0.66    | 0.36      | 0.98 | 0.95    | 0.25   | 0.63    | 0.35      | 0.97 | 0.94    | 0.23   | 0.67    | 0.40      | 0.98 | 0.93    |
| DNF0809                       | 0.03   | 0.98    | 0.52      | 0.99 | 0.94    | -0.22  | 0.86    | 0.55      | 0.95 | 0.91    | 0.24   | 0.86    | 0.27      | 0.98 | 0.95    | 0.19   | 0.89    | 0.28      | 0.97 | 0.94    | 0.21   | 0.87    | 0.26      | 0.98 | 0.84    |
| Dorea                         | 0.82   | 0.45    | 0.25      | 0.89 | 0.94    | 0.62   | 0.56    | 0.42      | 0.95 | 0.91    | 1.34   | 0.21    | 0.12      | 0.98 | 0.88    | 1.32   | 0.22    | 0.13      | 0.97 | 0.88    | 1.34   | 0.22    | 0.12      | 0.98 | 0.84    |
| DTU089                        | 1.71   | 0.10    | 0.07      | 0.60 | 0.90    | 1.65   | 0.10    | 0.06      | 0.80 | 0.91    | 1.67   | 0.11    | 0.04      | 0.89 | 0.54    | 1.63   | 0.12    | 0.04      | 0.97 | 0.52    | 1.66   | 0.11    | 0.05      | 0.92 | 0.59    |
| Eggerthella                   | 0.06   | 0.95    | 0.18      | 0.99 | 0.94    | -0.22  | 0.82    | 0.24      | 0.95 | 0.91    | 0.23   | 0.82    | 0.22      | 0.98 | 0.88    | 0.21   | 0.83    | 0.22      | 0.97 | 0.88    | 0.18   | 0.86    | 0.28      | 0.98 | 0.85    |
| Eisenbergiella                | -1.75  | 0.08    | 0.28      | 0.58 | 0.94    | -1.79  | 0.07    | 0.24      | 0.80 | 0.91    | -1.75  | 0.09    | 0.38      | 0.89 | 0.95    | -1.80  | 0.08    | 0.39      | 0.91 | 0.94    | -1.87  | 0.07    | 0.28      | 0.91 | 0.84    |
| Erysipelatoclostridium        | -0.66  | 0.50    | 0.73      | 0.89 | 0.94    | -0.58  | 0.55    | 0.79      | 0.95 | 0.96    | -0.88  | 0.38    | 0.57      | 0.98 | 0.95    | -0.90  | 0.37    | 0.59      | 0.97 | 0.95    | -0.93  | 0.35    | 0.54      | 0.98 | 0.93    |
| Erysipelotrichaceae_UCG.003   | 0.62   | 0.41    | 0.69      | 0.89 | 0.94    | 0.53   | 0.47    | 0.72      | 0.95 | 0.93    | 0.30   | 0.69    | 0.73      | 0.98 | 0.98    | 0.32   | 0.68    | 0.70      | 0.97 | 0.95    | 0.34   | 0.66    | 0.59      | 0.98 | 0.95    |
| Escherichia_Shigella          | -0.29  | 0.67    | 0.50      | 0.92 | 0.94    | 0.03   | 0.96    | 0.39      | 0.97 | 0.91    | -0.14  | 0.85    | 0.74      | 0.98 | 0.98    | -0.12  | 0.86    | 0.74      | 0.97 | 0.95    | -0.19  | 0.79    | 0.82      | 0.98 | 0.98    |
| Faecalibacterium              | 0.55   | 0.64    | 0.99      | 0.92 | 1.00    | 0.61   | 0.60    | 0.75      | 0.95 | 0.93    | 0.38   | 0.76    | 0.80      | 0.98 | 0.98    | 0.38   | 0.76    | 0.81      | 0.97 | 0.95    | 0.37   | 0.77    | 0.80      | 0.98 | 0.98    |
| Family_XIII_AD3011_group      | 1.40   | 0.15    | 0.42      | 0.70 | 0.94    | 0.72   | 0.45    | 0.67      | 0.95 | 0.93    | 0.70   | 0.49    | 0.51      | 0.98 | 0.95    | 0.65   | 0.53    | 0.51      | 0.97 | 0.95    | 0.60   | 0.56    | 0.51      | 0.98 | 0.93    |
| Family_XIII_UCG.001           | 0.69   | 0.53    | 0.78      | 0.89 | 0.94    | 0.39   | 0.72    | 0.74      | 0.95 | 0.93    | 0.38   | 0.74    | 0.91      | 0.98 | 0.98    | 0.32   | 0.78    | 0.90      | 0.97 | 0.98    | 0.31   | 0.79    | 0.91      | 0.98 | 0.99    |
| FD2005                        | -1.99  | 0.05    | 0.02      | 0.49 | 0.90    | -1.80  | 0.06    | 0.02      | 0.80 | 0.61    | -1.67  | 0.10    | 0.03      | 0.89 | 0.54    | -1.63  | 0.11    | 0.03      | 0.97 | 0.52    | -1.67  | 0.10    | 0.03      | 0.92 | 0.57    |
| Flavonifractor                | 0.08   | 0.93    | 0.12      | 0.98 | 0.94    | 0.09   | 0.91    | 0.11      | 0.97 | 0.91    | 0.28   | 0.76    | 0.10      | 0.98 | 0.88    | 0.28   | 0.76    | 0.10      | 0.97 | 0.82    | 0.25   | 0.78    | 0.11      | 0.98 | 0.84    |
| Fourmerella                   | -0.02  | 0.98    | 0.83      | 0.99 | 0.94    | -0.05  | 0.96    | 0.87      | 0.97 | 0.96    | -0.54  | 0.59    | 0.69      | 0.98 | 0.98    | -0.56  | 0.57    | 0.71      | 0.97 | 0.95    | -0.55  | 0.58    | 0.70      | 0.98 | 0.98    |
| Frisingicoccus                | 0.00   | 1.00    | 0.92      | 1.00 | 0.96    | 0.16   | 0.85    | 0.71      | 0.95 | 0.93    | 0.23   | 0.80    | 0.44      | 0.98 | 0.95    | 0.25   | 0.78    | 0.41      | 0.97 | 0.94    | 0.28   | 0.75    | 0.41      | 0.96 | 0.93    |
| Frisicatibacter               | 0.29   | 0.74    | 0.99      | 0.93 | 1.00    | 0.19   | 0.82    | 0.87      | 0.95 | 0.96    | 0.57   | 0.52    | 0.33      | 0.98 | 0.95    | 0.60   | 0.50    | 0.32      | 0.97 | 0.94    | 0.60   | 0.50    | 0.27      | 0.98 | 0.84    |
| Fusobacterium                 | 0.21   | 0.82    | 0.21      | 0.94 | 0.94    | 0.44   | 0.62    | 0.19      | 0.95 | 0.91    | 0.40   | 0.67    | 0.06      | 0.98 | 0.73    | 0.37   | 0.69    | 0.06      | 0.97 | 0.74    | 0.32   | 0.73    | 0.05      | 0.98 | 0.59    |
| GCA_900066575                 | 0.95   | 0.36    | 0.87      | 0.89 | 0.95    | 0.56   | 0.57    | 0.89      | 0.95 | 0.96    | 0.50   | 0.63    | 0.89      | 0.98 | 0.98    | 0.48   | 0.64    | 0.85      | 0.97 | 0.97    | 0.41   | 0.69    | 0.78      | 0.98 | 0.98    |
| Gordonibacter                 | 0.83   | 0.48    | 0.78      | 0.89 | 0.94    | 0.49   | 0.67    | 0.86      | 0.95 | 0.96    | 0.76   | 0.52    | 0.58      | 0.98 | 0.95    | 0.73   | 0.54    | 0.57      | 0.97 | 0.95    | 0.76   | 0.52    | 0.53      | 0.98 | 0.93    |
| Granulicatella                | -1.30  | 0.39    | 0.24      | 0.89 | 0.94    | -1.02  | 0.48    | 0.30      | 0.95 | 0.91    | -1.12  | 0.47    | 0.16      | 0.98 | 0.88    | -1.19  | 0.45    | 0.14      | 0.97 | 0.88    | -1.18  | 0.45    | 0.11      | 0.98 | 0.84</  |

|                       |       |      |      |      |      |       |      |      |      |      |       |      |      |      |      |       |      |      |      |      |       |      |      |      |      |      |
|-----------------------|-------|------|------|------|------|-------|------|------|------|------|-------|------|------|------|------|-------|------|------|------|------|-------|------|------|------|------|------|
| Monoglobus            | 1.30  | 0.14 | 0.68 | 0.68 | 0.94 | 1.04  | 0.23 | 0.71 | 0.95 | 0.93 | 0.89  | 0.34 | 0.83 | 0.98 | 0.98 | 0.89  | 0.34 | 0.81 | 0.97 | 0.95 | 0.91  | 0.33 | 0.76 | 0.98 | 0.98 |      |
| Moryella              | 0.73  | 0.55 | 0.91 | 0.89 | 0.96 | 0.42  | 0.73 | 0.99 | 0.95 | 0.99 | 0.26  | 0.84 | 0.84 | 0.98 | 0.98 | 0.24  | 0.85 | 0.86 | 0.97 | 0.88 | 0.97  | 0.20 | 0.87 | 0.88 | 0.98 | 0.98 |
| Negativibacillus      | -1.23 | 0.14 | 0.05 | 0.68 | 0.90 | -1.44 | 0.08 | 0.02 | 0.80 | 0.61 | -1.61 | 0.06 | 0.03 | 0.89 | 0.54 | -1.60 | 0.06 | 0.03 | 0.91 | 0.52 | -1.62 | 0.06 | 0.03 | 0.91 | 0.57 |      |
| NK4A214_group         | 0.46  | 0.48 | 0.50 | 0.89 | 0.94 | 0.13  | 0.84 | 0.66 | 0.95 | 0.93 | -0.07 | 0.92 | 0.60 | 0.98 | 0.95 | -0.09 | 0.89 | 0.59 | 0.97 | 0.95 | -0.12 | 0.85 | 0.62 | 0.98 | 0.96 |      |
| Odoribacter           | 0.54  | 0.39 | 0.40 | 0.89 | 0.94 | 0.50  | 0.42 | 0.47 | 0.95 | 0.91 | 0.08  | 0.91 | 0.40 | 0.98 | 0.95 | 0.08  | 0.90 | 0.42 | 0.97 | 0.94 | 0.07  | 0.91 | 0.47 | 0.98 | 0.93 |      |
| Oscillibacter         | 1.06  | 0.31 | 0.26 | 0.89 | 0.94 | 0.86  | 0.40 | 0.24 | 0.95 | 0.91 | 1.01  | 0.35 | 0.21 | 0.98 | 0.88 | 0.98  | 0.37 | 0.21 | 0.97 | 0.88 | 0.97  | 0.37 | 0.18 | 0.98 | 0.84 |      |
| Oscillospira          | 3.09  | 0.04 | 0.08 | 0.48 | 0.90 | 2.89  | 0.04 | 0.12 | 0.80 | 0.91 | 2.79  | 0.06 | 0.13 | 0.89 | 0.88 | 2.77  | 0.06 | 0.13 | 0.91 | 0.88 | 2.79  | 0.06 | 0.14 | 0.91 | 0.84 |      |
| Oxalobacter           | 2.75  | 0.01 | 0.02 | 0.45 | 0.90 | 2.19  | 0.03 | 0.02 | 0.80 | 0.61 | 1.93  | 0.07 | 0.02 | 0.89 | 0.54 | 1.93  | 0.07 | 0.02 | 0.91 | 0.52 | 1.89  | 0.08 | 0.03 | 0.91 | 0.57 |      |
| Paludicola            | 2.27  | 0.03 | 0.08 | 0.48 | 0.90 | 1.46  | 0.16 | 0.18 | 0.95 | 0.91 | 1.49  | 0.18 | 0.10 | 0.98 | 0.88 | 1.43  | 0.20 | 0.10 | 0.97 | 0.82 | 1.41  | 0.20 | 0.14 | 0.98 | 0.84 |      |
| Parabacteroides       | 0.43  | 0.57 | 0.63 | 0.89 | 0.94 | 0.70  | 0.34 | 0.69 | 0.95 | 0.93 | 0.63  | 0.40 | 0.80 | 0.98 | 0.98 | 0.58  | 0.44 | 0.73 | 0.97 | 0.95 | 0.60  | 0.43 | 0.73 | 0.98 | 0.98 |      |
| Paraprevotella        | -0.26 | 0.61 | 0.38 | 0.92 | 0.94 | -0.13 | 0.80 | 0.38 | 0.95 | 0.91 | -0.12 | 0.83 | 0.57 | 0.98 | 0.95 | -0.15 | 0.79 | 0.55 | 0.97 | 0.95 | -0.12 | 0.83 | 0.60 | 0.98 | 0.95 |      |
| Parasutterella        | 0.59  | 0.31 | 0.85 | 0.89 | 0.95 | 0.58  | 0.30 | 0.98 | 0.95 | 0.99 | 0.37  | 0.54 | 0.98 | 0.98 | 0.99 | 0.39  | 0.52 | 1.00 | 0.97 | 1.00 | 0.38  | 0.53 | 0.86 | 0.98 | 0.98 |      |
| Peptococcus           | -0.91 | 0.37 | 0.13 | 0.89 | 0.94 | -1.35 | 0.17 | 0.10 | 0.95 | 0.91 | -1.45 | 0.16 | 0.31 | 0.98 | 0.95 | -1.48 | 0.15 | 0.31 | 0.97 | 0.94 | -1.50 | 0.14 | 0.26 | 0.98 | 0.84 |      |
| Phascolarctobacterium | 0.57  | 0.28 | 0.60 | 0.89 | 0.94 | 0.56  | 0.27 | 0.49 | 0.95 | 0.91 | 0.43  | 0.43 | 0.36 | 0.98 | 0.95 | 0.41  | 0.45 | 0.36 | 0.97 | 0.94 | 0.44  | 0.43 | 0.35 | 0.98 | 0.92 |      |
| Phocaea               | -0.40 | 0.76 | 0.69 | 0.93 | 0.94 | -0.85 | 0.50 | 0.48 | 0.95 | 0.91 | -1.34 | 0.31 | 0.26 | 0.98 | 0.95 | -1.33 | 0.31 | 0.26 | 0.97 | 0.94 | -1.39 | 0.29 | 0.24 | 0.98 | 0.84 |      |
| Prevotella            | -0.49 | 0.27 | 0.38 | 0.89 | 0.94 | -0.39 | 0.37 | 0.23 | 0.95 | 0.91 | -0.44 | 0.33 | 0.34 | 0.98 | 0.95 | -0.45 | 0.32 | 0.33 | 0.97 | 0.94 | -0.43 | 0.34 | 0.33 | 0.98 | 0.91 |      |
| Romboutsia            | 0.58  | 0.48 | 0.44 | 0.89 | 0.94 | 0.82  | 0.31 | 0.37 | 0.95 | 0.91 | 0.78  | 0.36 | 0.37 | 0.98 | 0.95 | 0.80  | 0.34 | 0.37 | 0.97 | 0.94 | 0.81  | 0.34 | 0.31 | 0.98 | 0.91 |      |
| Roseburia             | 1.62  | 0.14 | 0.18 | 0.68 | 0.94 | 1.13  | 0.29 | 0.32 | 0.95 | 0.91 | 0.51  | 0.66 | 0.62 | 0.98 | 0.95 | 0.54  | 0.64 | 0.61 | 0.97 | 0.95 | 0.48  | 0.68 | 0.69 | 0.98 | 0.98 |      |
| Ruminococcus          | -0.43 | 0.52 | 0.26 | 0.89 | 0.94 | -0.61 | 0.34 | 0.34 | 0.95 | 0.91 | -0.68 | 0.32 | 0.53 | 0.98 | 0.95 | -0.68 | 0.32 | 0.54 | 0.97 | 0.95 | -0.70 | 0.31 | 0.56 | 0.98 | 0.93 |      |
| Sellimonas            | 0.30  | 0.74 | 0.55 | 0.93 | 0.94 | 0.42  | 0.63 | 0.88 | 0.95 | 0.96 | 0.11  | 0.90 | 0.87 | 0.98 | 0.98 | 0.09  | 0.93 | 0.88 | 0.97 | 0.97 | 0.09  | 0.92 | 0.88 | 0.98 | 0.98 |      |
| Senegalimassilia      | 0.23  | 0.78 | 0.43 | 0.94 | 0.94 | 0.21  | 0.79 | 0.36 | 0.95 | 0.91 | 0.06  | 0.94 | 0.30 | 0.98 | 0.95 | 0.02  | 0.98 | 0.27 | 0.99 | 0.94 | 0.02  | 0.98 | 0.26 | 1.00 | 0.84 |      |
| Shuttleworthia        | 0.65  | 0.54 | 0.44 | 0.89 | 0.94 | 0.28  | 0.79 | 0.29 | 0.95 | 0.91 | 0.41  | 0.71 | 0.17 | 0.98 | 0.88 | 0.44  | 0.69 | 0.15 | 0.97 | 0.88 | 0.45  | 0.68 | 0.17 | 0.98 | 0.84 |      |
| Slackia               | -1.01 | 0.17 | 0.07 | 0.74 | 0.90 | -0.81 | 0.25 | 0.08 | 0.95 | 0.91 | -0.81 | 0.28 | 0.11 | 0.98 | 0.88 | -0.86 | 0.25 | 0.09 | 0.97 | 0.82 | -0.88 | 0.24 | 0.12 | 0.98 | 0.84 |      |
| Streptococcus         | -0.04 | 0.97 | 0.34 | 0.99 | 0.94 | -0.09 | 0.93 | 0.35 | 0.97 | 0.91 | 0.20  | 0.87 | 0.57 | 0.98 | 0.95 | 0.12  | 0.92 | 0.62 | 0.97 | 0.95 | 0.12  | 0.92 | 0.63 | 0.98 | 0.96 |      |
| Subdoligranulum       | 0.41  | 0.64 | 0.52 | 0.92 | 0.94 | 0.20  | 0.81 | 0.53 | 0.95 | 0.91 | 0.26  | 0.77 | 0.99 | 0.98 | 0.99 | 0.23  | 0.79 | 1.00 | 0.97 | 1.00 | 0.25  | 0.77 | 0.97 | 0.98 | 1.00 |      |
| Sutterella            | -0.10 | 0.85 | 0.83 | 0.94 | 0.94 | 0.09  | 0.86 | 0.93 | 0.95 | 0.98 | 0.25  | 0.63 | 0.55 | 0.98 | 0.95 | 0.23  | 0.65 | 0.58 | 0.97 | 0.95 | 0.27  | 0.60 | 0.53 | 0.98 | 0.93 |      |
| TM7x                  | -1.52 | 0.20 | 0.79 | 0.84 | 0.94 | -1.83 | 0.11 | 0.82 | 0.82 | 0.96 | -1.27 | 0.29 | 0.90 | 0.98 | 0.98 | -1.29 | 0.29 | 0.89 | 0.97 | 0.97 | -1.31 | 0.28 | 0.85 | 0.98 | 0.98 |      |
| Turicibacter          | 1.16  | 0.27 | 0.57 | 0.89 | 0.94 | 1.68  | 0.10 | 0.40 | 0.80 | 0.91 | 1.76  | 0.10 | 0.49 | 0.89 | 0.95 | 1.80  | 0.10 | 0.46 | 0.94 | 0.95 | 1.81  | 0.09 | 0.33 | 0.92 | 0.91 |      |
| Tuzzerella            | 0.13  | 0.88 | 0.76 | 0.95 | 0.94 | 0.14  | 0.86 | 0.86 | 0.95 | 0.96 | -0.26 | 0.76 | 0.99 | 0.98 | 0.99 | -0.25 | 0.77 | 0.96 | 0.97 | 1.00 | -0.23 | 0.78 | 0.84 | 0.98 | 0.98 |      |
| UBA1819               | -0.31 | 0.80 | 0.50 | 0.94 | 0.94 | -0.63 | 0.60 | 0.36 | 0.95 | 0.91 | -0.35 | 0.78 | 0.46 | 0.98 | 0.95 | -0.40 | 0.75 | 0.46 | 0.97 | 0.95 | -0.44 | 0.73 | 0.41 | 0.98 | 0.93 |      |
| UCG_002               | -0.14 | 0.83 | 0.30 | 0.94 | 0.94 | -0.47 | 0.46 | 0.22 | 0.95 | 0.91 | -0.65 | 0.32 | 0.42 | 0.98 | 0.95 | -0.68 | 0.31 | 0.42 | 0.97 | 0.94 | -0.70 | 0.29 | 0.42 | 0.98 | 0.93 |      |
| UCG_003               | 0.65  | 0.33 | 0.65 | 0.89 | 0.94 | 0.31  | 0.63 | 0.58 | 0.95 | 0.91 | 0.17  | 0.80 | 0.66 | 0.98 | 0.98 | 0.15  | 0.83 | 0.64 | 0.97 | 0.95 | 0.13  | 0.85 | 0.73 | 0.98 | 0.98 |      |
| UCG_005               | 1.10  | 0.14 | 0.72 | 0.68 | 0.94 | 0.88  | 0.22 | 0.67 | 0.95 | 0.93 | 0.83  | 0.29 | 0.49 | 0.98 | 0.95 | 0.80  | 0.31 | 0.49 | 0.97 | 0.95 | 0.81  | 0.30 | 0.44 | 0.98 | 0.93 |      |
| UCG_009               | 0.58  | 0.60 | 0.57 | 0.92 | 0.94 | 0.21  | 0.85 | 0.45 | 0.95 | 0.91 | -0.09 | 0.94 | 0.32 | 0.98 | 0.95 | -0.10 | 0.93 | 0.32 | 0.97 | 0.94 | -0.13 | 0.90 | 0.34 | 0.98 | 0.91 |      |
| Veillonella           | 0.52  | 0.50 | 0.38 | 0.89 | 0.94 | 0.59  | 0.42 | 0.29 | 0.95 | 0.91 | 0.39  | 0.62 | 0.73 | 0.98 | 0.98 | 0.38  | 0.63 | 0.76 | 0.97 | 0.95 | 0.37  | 0.64 | 0.80 | 0.98 | 0.98 |      |
| Victivallis           | 0.29  | 0.70 | 0.63 | 0.92 | 0.94 | 0.08  | 0.92 | 0.69 | 0.97 | 0.93 | -0.17 | 0.82 | 0.93 | 0.98 | 0.98 | -0.17 | 0.82 | 0.89 | 0.97 | 0.97 | -0.19 | 0.80 | 1.00 | 0.98 | 1.00 |      |

Multivariable-adjusted regression models adjusted for:

Model 1: sequencing batch, age, race, gender, study center

Model 2: Model 1, with education

Model 3: Model 2, with physical activity, diet score, medication use, and smoking

Model 4: Model 3 with BMI

Model 5: Model 4 with hypertension and diabetes

eTable 45: Multivariable-adjusted regression coefficients, p-values, sex interaction p-values, false discovery rate (FDR)-adjusted p-values for sex-genera interaction with respect to MOCA.

|                               | Model1 |         |           |      |         | Model2 |         |           |      |         | Model3 |         |           |      |         | Model4 |         |           |      |         | Model5 |         |           |      |         |
|-------------------------------|--------|---------|-----------|------|---------|--------|---------|-----------|------|---------|--------|---------|-----------|------|---------|--------|---------|-----------|------|---------|--------|---------|-----------|------|---------|
|                               | beta   | p-value | p-val Int | FDR  | FDR-int | beta   | p-value | p-val Int | FDR  | FDR-int | beta   | p-value | p-val Int | FDR  | FDR-int | beta   | p-value | p-val Int | FDR  | FDR-int | beta   | p-value | p-val Int | FDR  | FDR-int |
| Acetanaerobacterium           | -0.36  | 0.43    | 0.88      | 0.65 | 0.96    | -0.36  | 0.40    | 0.52      | 0.72 | 0.98    | -0.74  | 0.09    | 0.16      | 0.38 | 0.49    | -0.74  | 0.09    | 0.16      | 0.38 | 0.50    | -0.76  | 0.08    | 0.16      | 0.37 | 0.51    |
| Acidaminococcus               | -0.24  | 0.07    | 0.61      | 0.26 | 0.94    | -0.14  | 0.27    | 0.62      | 0.56 | 0.98    | -0.19  | 0.14    | 0.84      | 0.49 | 0.98    | -0.19  | 0.14    | 0.84      | 0.50 | 0.97    | -0.19  | 0.15    | 0.76      | 0.49 | 0.94    |
| Actinomyces                   | -0.10  | 0.80    | 0.89      | 0.92 | 0.96    | -0.07  | 0.85    | 0.94      | 0.92 | 0.99    | -0.05  | 0.89    | 0.78      | 0.97 | 0.96    | -0.07  | 0.86    | 0.75      | 0.97 | 0.94    | -0.04  | 0.92    | 0.67      | 0.97 | 0.90    |
| Adiercreutzia                 | -0.05  | 0.82    | 0.71      | 0.92 | 0.94    | -0.02  | 0.93    | 0.95      | 0.97 | 0.99    | -0.07  | 0.74    | 0.95      | 0.95 | 0.98    | -0.07  | 0.75    | 0.92      | 0.96 | 0.98    | -0.07  | 0.73    | 0.96      | 0.96 | 0.98    |
| Agathobacter                  | -0.10  | 0.74    | 0.54      | 0.91 | 0.94    | -0.24  | 0.41    | 0.84      | 0.72 | 0.99    | -0.26  | 0.38    | 0.80      | 0.72 | 0.97    | -0.26  | 0.38    | 0.80      | 0.73 | 0.97    | -0.25  | 0.40    | 0.83      | 0.76 | 0.95    |
| Akkermansia                   | 0.09   | 0.57    | 0.31      | 0.78 | 0.85    | -0.05  | 0.73    | 0.12      | 0.87 | 0.45    | -0.17  | 0.27    | 0.03      | 0.58 | 0.20    | -0.17  | 0.27    | 0.03      | 0.59 | 0.21    | -0.17  | 0.26    | 0.03      | 0.57 | 0.20    |
| Alistipes                     | 0.37   | 0.18    | 0.61      | 0.40 | 0.94    | 0.15   | 0.56    | 0.90      | 0.83 | 0.99    | -0.06  | 0.82    | 0.52      | 0.97 | 0.88    | -0.06  | 0.83    | 0.52      | 0.97 | 0.89    | -0.09  | 0.72    | 0.47      | 0.96 | 0.84    |
| Allisonella                   | 0.11   | 0.64    | 0.00      | 0.82 | 0.17    | 0.36   | 0.12    | 0.01      | 0.38 | 0.14    | 0.28   | 0.25    | 0.03      | 0.57 | 0.21    | 0.28   | 0.25    | 0.03      | 0.56 | 0.22    | 0.28   | 0.25    | 0.02      | 0.57 | 0.18    |
| Anaerofilum                   | -0.17  | 0.62    | 0.22      | 0.81 | 0.74    | -0.34  | 0.28    | 0.34      | 0.56 | 0.85    | -0.43  | 0.18    | 0.23      | 0.54 | 0.63    | -0.43  | 0.18    | 0.23      | 0.53 | 0.63    | -0.46  | 0.16    | 0.19      | 0.49 | 0.56    |
| Anaerostipes                  | 0.20   | 0.59    | 0.87      | 0.78 | 0.96    | 0.00   | 1.00    | 0.64      | 1.00 | 0.98    | 0.09   | 0.79    | 0.94      | 0.97 | 0.98    | 0.10   | 0.78    | 0.95      | 0.97 | 0.98    | 0.10   | 0.77    | 0.87      | 0.97 | 0.97    |
| Anaerotruncus                 | -0.25  | 0.41    | 0.05      | 0.64 | 0.37    | -0.41  | 0.15    | 0.02      | 0.43 | 0.16    | -0.37  | 0.19    | 0.01      | 0.54 | 0.13    | -0.38  | 0.20    | 0.01      | 0.53 | 0.13    | -0.39  | 0.18    | 0.01      | 0.54 | 0.10    |
| Bacteroides                   | -0.13  | 0.78    | 0.63      | 0.92 | 0.94    | -0.23  | 0.60    | 0.62      | 0.83 | 0.98    | -0.17  | 0.69    | 0.82      | 0.94 | 0.98    | -0.16  | 0.71    | 0.82      | 0.95 | 0.97    | -0.17  | 0.70    | 0.79      | 0.95 | 0.94    |
| Barnesiella                   | 0.19   | 0.18    | 0.76      | 0.40 | 0.94    | 0.21   | 0.11    | 0.61      | 0.38 | 0.98    | 0.19   | 0.17    | 0.99      | 0.52 | 0.99    | 0.19   | 0.17    | 0.99      | 0.52 | 0.99    | 0.20   | 0.15    | 0.99      | 0.49 | 0.99    |
| Bifidobacterium               | -0.19  | 0.29    | 0.59      | 0.53 | 0.94    | -0.05  | 0.76    | 0.59      | 0.88 | 0.98    | -0.07  | 0.66    | 0.51      | 0.94 | 0.88    | -0.07  | 0.67    | 0.51      | 0.95 | 0.89    | -0.07  | 0.67    | 0.56      | 0.94 | 0.87    |
| Bifidophila                   | 0.07   | 0.75    | 0.62      | 0.91 | 0.94    | -0.10  | 0.61    | 0.24      | 0.83 | 0.70    | -0.31  | 0.12    | 0.05      | 0.46 | 0.23    | -0.30  | 0.12    | 0.05      | 0.47 | 0.24    | -0.30  | 0.13    | 0.05      | 0.49 | 0.24    |
| Blautia                       | -0.46  | 0.49    | 0.40      | 0.70 | 0.94    | -0.97  | 0.12    | 0.12      | 0.38 | 0.45    | -0.80  | 0.20    | 0.15      | 0.54 | 0.49    | -0.80  | 0.20    | 0.15      | 0.53 | 0.50    | -0.79  | 0.21    | 0.08      | 0.57 | 0.33    |
| Butyricoccus                  | 0.56   | 0.26    | 0.52      | 0.51 | 0.94    | 0.10   | 0.84    | 0.72      | 0.92 | 0.98    | -0.05  | 0.92    | 0.69      | 0.97 | 0.94    | -0.05  | 0.92    | 0.69      | 0.97 | 0.93    | -0.08  | 0.86    | 0.74      | 0.97 | 0.94    |
| Butyricimonas                 | -0.12  | 0.47    | 0.03      | 0.70 | 0.37    | -0.20  | 0.18    | 0.01      | 0.48 | 0.16    | -0.18  | 0.24    | 0.01      | 0.57 | 0.13    | -0.18  | 0.23    | 0.01      | 0.56 | 0.13    | -0.19  | 0.21    | 0.02      | 0.57 | 0.18    |
| CAG_56                        | 0.34   | 0.06    | 0.06      | 0.25 | 0.37    | 0.23   | 0.17    | 0.09      | 0.46 | 0.38    | 0.18   | 0.29    | 0.19      | 0.59 | 0.57    | 0.18   | 0.29    | 0.19      | 0.59 | 0.57    | 0.18   | 0.29    | 0.24      | 0.61 | 0.63    |
| Candidatus_Soleaferrea        | -0.72  | 0.05    | 0.04      | 0.25 | 0.37    | -0.94  | 0.01    | 0.01      | 0.18 | 0.16    | -1.07  | 0.00    | 0.00      | 0.11 | 0.05    | -1.07  | 0.00    | 0.00      | 0.11 | 0.05    | -1.08  | 0.00    | 0.00      | 0.11 | 0.04    |
| Caproiciproducens             | -0.47  | 0.16    | 0.13      | 0.39 | 0.57    | -0.53  | 0.09    | 0.06      | 0.32 | 0.29    | -0.66  | 0.04    | 0.03      | 0.35 | 0.20    | -0.66  | 0.04    | 0.03      | 0.35 | 0.21    | -0.67  | 0.04    | 0.02      | 0.36 | 0.18    |
| Christensenellaceae_R.7_group | 0.27   | 0.09    | 0.91      | 0.28 | 0.96    | 0.18   | 0.22    | 0.98      | 0.53 | 0.99    | 0.15   | 0.34    | 0.74      | 0.67 | 0.96    | 0.15   | 0.34    | 0.74      | 0.67 | 0.94    | 0.14   | 0.37    | 0.64      | 0.74 | 0.90    |
| Clostridium_sensu_stricto_1   | 0.13   | 0.48    | 0.59      | 0.70 | 0.94    | 0.21   | 0.22    | 0.34      | 0.53 | 0.85    | 0.31   | 0.09    | 0.13      | 0.38 | 0.46    | 0.31   | 0.09    | 0.13      | 0.38 | 0.46    | 0.33   | 0.07    | 0.10      | 0.37 | 0.38    |
| Colidextribacter              | -0.22  | 0.56    | 0.86      | 0.78 | 0.96    | -0.46  | 0.19    | 0.52      | 0.48 | 0.98    | -0.36  | 0.31    | 0.56      | 0.63 | 0.88    | -0.36  | 0.31    | 0.57      | 0.63 | 0.89    | -0.36  | 0.31    | 0.45      | 0.62 | 0.84    |
| Collinsella                   | 0.02   | 0.93    | 0.45      | 0.97 | 0.94    | 0.10   | 0.57    | 0.82      | 0.83 | 0.99    | 0.03   | 0.85    | 0.93      | 0.97 | 0.98    | 0.03   | 0.86    | 0.91      | 0.97 | 0.97    | 0.03   | 0.89    | 0.92      | 0.97 | 0.98    |
| Coprobacter                   | 0.15   | 0.42    | 0.67      | 0.65 | 0.94    | 0.08   | 0.63    | 0.58      | 0.83 | 0.98    | -0.01  | 0.95    | 0.88      | 0.97 | 0.98    | -0.01  | 0.94    | 0.88      | 0.97 | 0.97    | -0.02  | 0.91    | 0.95      | 0.97 | 0.98    |
| Coprococcus                   | 0.49   | 0.03    | 0.01      | 0.20 | 0.22    | 0.30   | 0.15    | 0.11      | 0.43 | 0.45    | 0.37   | 0.09    | 0.08      | 0.38 | 0.33    | 0.37   | 0.09    | 0.08      | 0.38 | 0.33    | 0.35   | 0.10    | 0.10      | 0.42 | 0.38    |
| Defluviitaleaceae_UCG.011     | 0.10   | 0.74    | 0.31      | 0.91 | 0.85    | 0.11   | 0.69    | 0.55      | 0.87 | 0.98    | 0.02   | 0.93    | 0.34      | 0.97 | 0.75    | 0.02   | 0.94    | 0.34      | 0.97 | 0.74    | 0.01   | 0.96    | 0.36      | 0.97 | 0.75    |
| Desulfovibrio                 | -0.12  | 0.45    | 0.93      | 0.68 | 0.96    | -0.11  | 0.49    | 0.95      | 0.78 | 0.99    | -0.11  | 0.50    | 0.74      | 0.83 | 0.96    | -0.12  | 0.47    | 0.72      | 0.80 | 0.94    | -0.12  | 0.44    | 0.67      | 0.81 | 0.90    |
| Dialister                     | 0.06   | 0.65    | 0.26      | 0.83 | 0.78    | 0.07   | 0.55    | 0.20      | 0.83 | 0.63    | 0.08   | 0.56    | 0.17      | 0.87 | 0.51    | 0.08   | 0.55    | 0.17      | 0.86 | 0.51    | 0.08   | 0.55    | 0.21      | 0.89 | 0.58    |
| DNF0809                       | -0.02  | 0.97    | 0.44      | 0.99 | 0.94    | -0.10  | 0.75    | 0.36      | 0.88 | 0.85    | 0.04   | 0.91    | 0.34      | 0.97 | 0.75    | 0.03   | 0.92    | 0.34      | 0.97 | 0.74    | 0.03   | 0.92    | 0.33      | 0.97 | 0.71    |
| Dorea                         | 0.24   | 0.40    | 0.32      | 0.64 | 0.86    | 0.14   | 0.59    | 0.70      | 0.83 | 0.98    | 0.20   | 0.45    | 0.63      | 0.81 | 0.88    | 0.20   | 0.45    | 0.64      | 0.80 | 0.89    | 0.20   | 0.46    | 0.63      | 0.81 | 0.90    |
| DTU089                        | 0.06   | 0.84    | 0.61      | 0.93 | 0.94    | 0.03   | 0.89    | 0.69      | 0.96 | 0.98    | -0.07  | 0.78    | 0.30      | 0.97 | 0.72    | -0.08  | 0.77    | 0.30      | 0.97 | 0.71    | -0.09  | 0.74    | 0.25      | 0.96 | 0.65    |
| Eggerthella                   | -0.34  | 0.19    | 0.37      | 0.40 | 0.91    | -0.45  | 0.06    | 0.19      | 0.29 | 0.62    | -0.29  | 0.25    | 0.42      | 0.57 | 0.85    | -0.29  | 0.25    | 0.42      | 0.56 | 0.84    | -0.30  | 0.24    | 0.31      | 0.57 | 0.69    |
| Eisenbergiella                | -0.58  | 0.03    | 0.00      | 0.20 | 0.17    | -0.59  | 0.02    | 0.00      | 0.18 | 0.06    | -0.66  | 0.01    | 0.00      | 0.14 | 0.03    | -0.67  | 0.01    | 0.00      | 0.14 | 0.03    | -0.66  | 0.01    | 0.00      | 0.16 | 0.03    |
| Erysipelatoclostridium        | -0.51  | 0.05    | 0.04      | 0.25 | 0.37    | -0.48  | 0.05    | 0.04      | 0.29 | 0.23    | -0.35  | 0.16    | 0.10      | 0.52 | 0.41    | -0.36  | 0.16    | 0.10      | 0.51 | 0.42    | -0.34  | 0.19    | 0.10      | 0.54 | 0.38    |
| Erysipelotrichaceae_UCG.003   | 0.17   | 0.39    | 0.75      | 0.64 | 0.94    | 0.13   | 0.49    | 0.81      | 0.78 | 0.99    | 0.02   | 0.93    | 0.86      | 0.97 | 0.98    | 0.02   | 0.92    | 0.87      | 0.97 | 0.97    | 0.01   | 0.95    | 0.88      | 0.97 | 0.97    |
| Escherichia_Shigella          | -0.33  | 0.08    | 0.21      | 0.26 | 0.74    | -0.19  | 0.27    | 0.30      | 0.56 | 0.79    | -0.31  | 0.09    | 0.11      | 0.38 | 0.42    | -0.31  | 0.09    | 0.11      | 0.38 | 0.42    | -0.32  | 0.08    | 0.10      | 0.37 | 0.38    |
| Faecalibacterium              | -0.44  | 0.16    | 0.73      | 0.39 | 0.94    | 0.45   | 0.13    | 0.41      | 0.39 | 0.91    | 0.59   | 0.06    | 0.15      | 0.38 | 0.49    | 0.59   | 0.06    | 0.15      | 0.38 | 0.50    | 0.59   | 0.06    | 0.15      | 0.37 | 0.50    |
| Family_XIII_AD3011_group      | 0.56   | 0.03    | 0.35      | 0.20 | 0.91    | 0.28   | 0.26    | 0.70      | 0.56 | 0.98    | 0.21   | 0.41    | 0.97      | 0.77 | 0.99    | 0.21   | 0.42    | 0.97      | 0.78 | 0.98    | 0.19   | 0.47    | 0.91      | 0.81 | 0.94    |
| Family_XIII_UCG.001           | 0.27   | 0.37    | 0.99      | 0.62 | 0.99    | 0.13   | 0.63    | 0.95      | 0.83 | 0.99    | 0.09   | 0.74    | 0.77      | 0.95 | 0.96    | 0.09   | 0.75    | 0.77      | 0.96 | 0.96    | 0.07   | 0.80    | 0.75      | 0.97 | 0.98    |
| FD2005                        | -0.27  | 0.32    | 0.79      | 0.55 | 0.96    | -0.19  | 0.45    | 0.80      | 0.77 | 0.99    | -0.12  | 0.64    | 0.65      | 0.93 | 0.90    | -0.11  | 0.66    | 0.64      | 0.95 | 0.89    | -0.13  | 0.61    | 0.65      | 0.93 | 0.90    |
| Flavonifractor                | -0.45  | 0.05    | 0.06      | 0.25 | 0.37    | -0.44  | 0.04    | 0.04      | 0.28 | 0.23    | -0.39  | 0.09    | 0.03      | 0.38 | 0.22    | -0.39  | 0.09    | 0.03      | 0.38 | 0.22    | -0.38  | 0.10    | 0.02      | 0.41 | 0.18    |
| Fournierella                  | 0.28   | 0.28    | 0.36      | 0.53 | 0.91    | 0.26   | 0.28    | 0.28      | 0.56 | 0.77    | 0.32   | 0.20    | 0.29      | 0.54 | 0.70    | 0.32   | 0.20    | 0.28      | 0.53 | 0.69    | 0.31   | 0.22    | 0.30      | 0.57 | 0.69    |
| Frisingococcus                | 0.00   | 0.98    | 0.16      | 0.99 | 0.62    | 0.06   | 0.77    | 0.45      | 0.88 | 0.96    | -0.05  | 0.84    | 0.35      | 0.97 | 0.76    | -0.05  | 0.84    | 0.36      | 0.97 | 0.77    | -0.05  | 0.84    | 0.31      | 0.97 | 0.69    |
| Fusicatenibacter              | 0.06   | 0.81    | 0.71      | 0.92 | 0.94    | 0.01   | 0.96    | 0.54      | 0.99 | 0.98    | -0.08  | 0.71    | 0.66      | 0.94 | 0.90    | -0.08  | 0.71    | 0.66      | 0.95 | 0.90    | -0.09  | 0.69    | 0.68      | 0.95 | 0.90    |
| Fusobacterium                 | -0.37  | 0.14    | 0.57      | 0.37 | 0.94    | -0.26  | 0.26    | 0.48      | 0.56 | 0.98    | -0.17  | 0.47    | 0.62      | 0.81 | 0.88    | -0.17  | 0.46    | 0.63      | 0.80 | 0.89    | -0.18  | 0.45    | 0.65      | 0.81 | 0.90    |
| GCA_900066575                 | 0.34   | 0.21    | 0.66      | 0.43 | 0.94    | 0.18   | 0.49    | 0.69      | 0.78 | 0.98    | 0.10   | 0.70    | 0.61      | 0.94 | 0.88    | 0.10   | 0.70    | 0.61      | 0.95 | 0.89    | 0.08   | 0.76    | 0.57      | 0.86 | 0.87    |
| Gordonibacter                 | -0.54  | 0.08    | 0.03      | 0.27 | 0.34    | -0.66  | 0.02    | 0.01      | 0.19 | 0.16    | -0.54  | 0.07    | 0.04      | 0.38 | 0.22    | -0.54  | 0.07    | 0.04      | 0.38 | 0.23    | -0.56  | 0.06    | 0.03      | 0.37 | 0.20    |
| Granulicatella                | -0.44  | 0.27    | 0.51      | 0.51 | 0.94    | -0.32  | 0.39    | 0.70      | 0.72 | 0.98    | -0.47  | 0.23    | 0.49      | 0.57 | 0.88    | -0.47  | 0.23    | 0.47      | 0.56 | 0.86    | -0.46  | 0.24    | 0.49      | 0.57 | 0.84    |

|                       |       |      |      |      |      |       |      |      |      |      |       |      |      |      |      |       |      |      |      |      |       |      |      |      |      |
|-----------------------|-------|------|------|------|------|-------|------|------|------|------|-------|------|------|------|------|-------|------|------|------|------|-------|------|------|------|------|
| Monoglobus            | 0.51  | 0.03 | 0.86 | 0.20 | 0.96 | 0.40  | 0.07 | 0.91 | 0.29 | 0.99 | 0.25  | 0.29 | 0.62 | 0.59 | 0.88 | 0.25  | 0.29 | 0.62 | 0.59 | 0.89 | 0.26  | 0.27 | 0.56 | 0.58 | 0.87 |
| Moryella              | 0.70  | 0.03 | 0.16 | 0.20 | 0.62 | 0.57  | 0.07 | 0.09 | 0.29 | 0.39 | 0.45  | 0.15 | 0.23 | 0.49 | 0.63 | 0.45  | 0.15 | 0.24 | 0.51 | 0.63 | 0.45  | 0.16 | 0.27 | 0.49 | 0.67 |
| Negativibacillus      | -0.43 | 0.05 | 0.13 | 0.25 | 0.57 | -0.52 | 0.01 | 0.02 | 0.18 | 0.18 | -0.62 | 0.00 | 0.00 | 0.11 | 0.06 | -0.62 | 0.00 | 0.00 | 0.11 | 0.07 | -0.63 | 0.00 | 0.00 | 0.11 | 0.04 |
| NK4A214_group         | 0.25  | 0.15 | 0.66 | 0.39 | 0.94 | 0.11  | 0.48 | 0.91 | 0.78 | 0.99 | 0.02  | 0.93 | 0.61 | 0.97 | 0.88 | 0.01  | 0.93 | 0.61 | 0.97 | 0.89 | -0.01 | 0.98 | 0.49 | 0.98 | 0.84 |
| Odoribacter           | 0.09  | 0.59 | 0.71 | 0.78 | 0.94 | 0.08  | 0.63 | 0.91 | 0.83 | 0.99 | 0.00  | 1.00 | 0.60 | 1.00 | 0.88 | 0.00  | 1.00 | 0.61 | 1.00 | 0.89 | -0.01 | 0.95 | 0.59 | 0.97 | 0.88 |
| Oscillibacter         | 0.03  | 0.92 | 0.28 | 0.97 | 0.82 | -0.05 | 0.84 | 0.27 | 0.92 | 0.75 | -0.13 | 0.63 | 0.13 | 0.92 | 0.46 | -0.13 | 0.62 | 0.13 | 0.93 | 0.46 | -0.13 | 0.63 | 0.11 | 0.93 | 0.38 |
| Oscillospira          | 0.07  | 0.86 | 0.89 | 0.94 | 0.96 | -0.01 | 0.99 | 0.63 | 1.00 | 0.98 | -0.09 | 0.81 | 0.32 | 0.97 | 0.73 | -0.09 | 0.81 | 0.32 | 0.97 | 0.72 | -0.09 | 0.81 | 0.23 | 0.97 | 0.62 |
| Oxalobacter           | 0.17  | 0.55 | 0.48 | 0.77 | 0.94 | -0.06 | 0.83 | 0.52 | 0.92 | 0.98 | -0.05 | 0.86 | 0.62 | 0.97 | 0.88 | -0.05 | 0.86 | 0.62 | 0.97 | 0.89 | -0.07 | 0.78 | 0.54 | 0.97 | 0.87 |
| Paludicola            | 0.50  | 0.07 | 0.65 | 0.26 | 0.94 | 0.17  | 0.53 | 0.83 | 0.83 | 0.99 | -0.01 | 0.97 | 0.42 | 0.98 | 0.85 | -0.01 | 0.97 | 0.42 | 0.98 | 0.84 | -0.02 | 0.93 | 0.31 | 0.97 | 0.69 |
| Parabacteroides       | 0.01  | 0.97 | 0.92 | 0.99 | 0.96 | 0.12  | 0.53 | 0.98 | 0.83 | 0.99 | 0.10  | 0.62 | 0.76 | 0.92 | 0.96 | 0.09  | 0.64 | 0.73 | 0.94 | 0.94 | 0.09  | 0.64 | 0.74 | 0.93 | 0.94 |
| Paraprevotella        | -0.13 | 0.36 | 0.61 | 0.61 | 0.94 | -0.08 | 0.56 | 0.60 | 0.83 | 0.98 | -0.09 | 0.49 | 0.97 | 0.83 | 0.99 | -0.10 | 0.48 | 0.95 | 0.80 | 0.98 | -0.08 | 0.55 | 0.97 | 0.89 | 0.98 |
| Parasutterella        | 0.36  | 0.02 | 0.85 | 0.20 | 0.96 | 0.36  | 0.01 | 0.62 | 0.18 | 0.98 | 0.22  | 0.15 | 0.84 | 0.49 | 0.98 | 0.22  | 0.14 | 0.85 | 0.50 | 0.97 | 0.21  | 0.16 | 0.84 | 0.49 | 0.95 |
| Peptococcus           | 0.07  | 0.81 | 0.14 | 0.92 | 0.57 | -0.12 | 0.64 | 0.08 | 0.83 | 0.38 | -0.16 | 0.54 | 0.05 | 0.86 | 0.25 | -0.16 | 0.53 | 0.05 | 0.86 | 0.25 | -0.18 | 0.48 | 0.04 | 0.81 | 0.22 |
| Phascolarctobacterium | 0.02  | 0.89 | 0.23 | 0.97 | 0.75 | 0.01  | 0.93 | 0.13 | 0.97 | 0.47 | 0.02  | 0.89 | 0.15 | 0.97 | 0.49 | 0.02  | 0.90 | 0.15 | 0.97 | 0.50 | 0.01  | 0.92 | 0.19 | 0.97 | 0.56 |
| Phocaea               | -0.51 | 0.14 | 0.60 | 0.37 | 0.94 | -0.70 | 0.03 | 0.30 | 0.23 | 0.79 | -0.94 | 0.00 | 0.12 | 0.11 | 0.45 | -0.94 | 0.00 | 0.12 | 0.11 | 0.45 | -0.94 | 0.00 | 0.11 | 0.11 | 0.40 |
| Prevotella            | -0.13 | 0.27 | 0.60 | 0.51 | 0.94 | -0.09 | 0.40 | 0.92 | 0.72 | 0.99 | -0.09 | 0.42 | 0.85 | 0.77 | 0.98 | -0.09 | 0.41 | 0.86 | 0.78 | 0.97 | -0.09 | 0.42 | 0.84 | 0.79 | 0.95 |
| Romboutsia            | -0.10 | 0.66 | 0.59 | 0.83 | 0.94 | 0.00  | 0.99 | 0.44 | 1.00 | 0.96 | 0.03  | 0.89 | 0.48 | 0.97 | 0.88 | 0.03  | 0.88 | 0.48 | 0.97 | 0.86 | 0.04  | 0.85 | 0.43 | 0.97 | 0.83 |
| Roseburia             | 0.75  | 0.01 | 0.05 | 0.19 | 0.37 | 0.55  | 0.04 | 0.16 | 0.28 | 0.57 | 0.21  | 0.47 | 0.71 | 0.81 | 0.94 | 0.21  | 0.46 | 0.70 | 0.80 | 0.94 | 0.21  | 0.48 | 0.77 | 0.81 | 0.94 |
| Ruminococcus          | 0.28  | 0.11 | 0.92 | 0.32 | 0.96 | 0.20  | 0.22 | 0.68 | 0.53 | 0.98 | 0.10  | 0.55 | 0.88 | 0.87 | 0.98 | 0.10  | 0.56 | 0.88 | 0.86 | 0.97 | 0.10  | 0.57 | 0.79 | 0.89 | 0.94 |
| Sellimonas            | 0.46  | 0.06 | 0.13 | 0.25 | 0.57 | 0.51  | 0.02 | 0.02 | 0.19 | 0.16 | 0.62  | 0.01 | 0.00 | 0.11 | 0.06 | 0.61  | 0.01 | 0.00 | 0.12 | 0.07 | 0.62  | 0.01 | 0.01 | 0.11 | 0.08 |
| Senegalimassilia      | -0.06 | 0.77 | 0.89 | 0.92 | 0.96 | -0.07 | 0.72 | 0.98 | 0.87 | 0.99 | -0.02 | 0.93 | 0.98 | 0.97 | 0.99 | -0.02 | 0.91 | 0.96 | 0.97 | 0.98 | -0.02 | 0.93 | 0.96 | 0.97 | 0.98 |
| Shuttleworthia        | 0.17  | 0.54 | 0.27 | 0.77 | 0.79 | 0.02  | 0.93 | 0.46 | 0.97 | 0.96 | -0.15 | 0.58 | 0.21 | 0.88 | 0.62 | -0.15 | 0.58 | 0.22 | 0.89 | 0.63 | -0.14 | 0.62 | 0.20 | 0.93 | 0.57 |
| Slackia               | -0.02 | 0.91 | 0.93 | 0.97 | 0.96 | 0.06  | 0.76 | 0.72 | 0.88 | 0.98 | 0.08  | 0.68 | 0.78 | 0.94 | 0.96 | 0.07  | 0.70 | 0.80 | 0.95 | 0.97 | 0.06  | 0.74 | 0.82 | 0.96 | 0.95 |
| Streptococcus         | 0.40  | 0.19 | 0.55 | 0.40 | 0.94 | 0.38  | 0.17 | 0.54 | 0.47 | 0.98 | 0.43  | 0.15 | 0.60 | 0.49 | 0.88 | 0.42  | 0.16 | 0.61 | 0.51 | 0.89 | 0.44  | 0.14 | 0.56 | 0.49 | 0.87 |
| Subdoligranulum       | 0.46  | 0.05 | 0.83 | 0.25 | 0.96 | 0.37  | 0.09 | 0.77 | 0.32 | 0.99 | 0.34  | 0.12 | 0.94 | 0.46 | 0.98 | 0.33  | 0.13 | 0.93 | 0.47 | 0.98 | 0.32  | 0.15 | 0.79 | 0.49 | 0.94 |
| Sutterella            | -0.32 | 0.02 | 0.66 | 0.19 | 0.94 | -0.24 | 0.05 | 0.78 | 0.29 | 0.99 | -0.15 | 0.24 | 0.26 | 0.57 | 0.66 | -0.15 | 0.23 | 0.27 | 0.56 | 0.67 | -0.14 | 0.26 | 0.18 | 0.57 | 0.56 |
| TM7x                  | 0.00  | 0.99 | 0.73 | 0.99 | 0.94 | -0.12 | 0.69 | 0.78 | 0.87 | 0.99 | 0.05  | 0.88 | 0.88 | 0.97 | 0.98 | 0.04  | 0.89 | 0.88 | 0.97 | 0.97 | 0.04  | 0.90 | 0.99 | 0.97 | 0.99 |
| Turicibacter          | 0.30  | 0.30 | 0.43 | 0.53 | 0.94 | 0.51  | 0.06 | 0.20 | 0.29 | 0.63 | 0.48  | 0.08 | 0.58 | 0.38 | 0.88 | 0.49  | 0.07 | 0.57 | 0.38 | 0.89 | 0.49  | 0.07 | 0.48 | 0.37 | 0.84 |
| Tuzzerella            | -0.12 | 0.59 | 0.56 | 0.78 | 0.94 | -0.11 | 0.59 | 0.37 | 0.83 | 0.87 | -0.13 | 0.54 | 0.42 | 0.86 | 0.85 | -0.13 | 0.55 | 0.43 | 0.86 | 0.84 | -0.13 | 0.54 | 0.47 | 0.88 | 0.84 |
| UBA1819               | -0.61 | 0.06 | 0.01 | 0.26 | 0.17 | -0.73 | 0.02 | 0.00 | 0.18 | 0.06 | -0.76 | 0.01 | 0.00 | 0.17 | 0.03 | -0.77 | 0.01 | 0.00 | 0.17 | 0.03 | -0.77 | 0.01 | 0.00 | 0.17 | 0.01 |
| UCG_002               | 0.18  | 0.31 | 0.51 | 0.54 | 0.94 | 0.04  | 0.79 | 0.36 | 0.89 | 0.85 | 0.06  | 0.72 | 0.52 | 0.94 | 0.88 | 0.06  | 0.73 | 0.52 | 0.95 | 0.89 | 0.04  | 0.80 | 0.44 | 0.97 | 0.84 |
| UCG_003               | 0.39  | 0.03 | 0.13 | 0.20 | 0.57 | 0.24  | 0.15 | 0.15 | 0.43 | 0.55 | 0.16  | 0.34 | 0.23 | 0.67 | 0.63 | 0.16  | 0.35 | 0.24 | 0.67 | 0.63 | 0.15  | 0.38 | 0.22 | 0.75 | 0.62 |
| UCG_005               | 0.28  | 0.16 | 0.92 | 0.39 | 0.96 | 0.19  | 0.32 | 0.99 | 0.62 | 0.99 | 0.12  | 0.53 | 0.89 | 0.86 | 0.98 | 0.12  | 0.54 | 0.89 | 0.86 | 0.97 | 0.11  | 0.57 | 0.82 | 0.89 | 0.95 |
| UCG_009               | 0.25  | 0.41 | 0.72 | 0.64 | 0.94 | 0.10  | 0.73 | 0.95 | 0.87 | 0.99 | -0.03 | 0.90 | 0.58 | 0.97 | 0.88 | -0.04 | 0.90 | 0.58 | 0.97 | 0.89 | -0.06 | 0.83 | 0.50 | 0.97 | 0.85 |
| Veillonella           | 0.37  | 0.07 | 0.05 | 0.26 | 0.37 | 0.40  | 0.03 | 0.02 | 0.24 | 0.16 | 0.35  | 0.07 | 0.01 | 0.38 | 0.13 | 0.35  | 0.07 | 0.01 | 0.38 | 0.13 | 0.35  | 0.08 | 0.01 | 0.37 | 0.10 |
| Victivallis           | 0.02  | 0.92 | 0.72 | 0.97 | 0.94 | -0.07 | 0.70 | 0.83 | 0.87 | 0.99 | -0.07 | 0.72 | 0.91 | 0.94 | 0.98 | -0.07 | 0.72 | 0.89 | 0.95 | 0.97 | -0.07 | 0.70 | 0.95 | 0.95 | 0.98 |

Multivariable-adjusted regression models adjusted for:

Model 1: sequencing batch, age, race, gender, study center

Model 2: Model 1, with education

Model 3: Model 2, with physical activity, diet score, medication use, and smoking

Model 4: Model 3 with BMI

Model 5: Model 4 with hypertension and diabetes

eTable 46: Multivariable-adjusted regression coefficients, p-values, sex interaction p-values, false discovery rate (FDR)-adjusted p-values for sex-genera interaction with respect to PC (1st).

|                               | Model1 |         |           |      |         | Model2 |         |           |      |         | Model3 |         |           |      |         | Model4 |         |           |      |         | Model5 |         |           |      |         |
|-------------------------------|--------|---------|-----------|------|---------|--------|---------|-----------|------|---------|--------|---------|-----------|------|---------|--------|---------|-----------|------|---------|--------|---------|-----------|------|---------|
|                               | beta   | p-value | p-val Int | FDR  | FDR-int | beta   | p-value | p-val Int | FDR  | FDR-int | beta   | p-value | p-val Int | FDR  | FDR-int | beta   | p-value | p-val Int | FDR  | FDR-int | beta   | p-value | p-val Int | FDR  | FDR-int |
| Acetanaerobacterium           | 0.00   | 0.98    | 0.74      | 0.99 | 0.91    | 0.00   | 0.99    | 0.86      | 0.99 | 0.97    | -0.13  | 0.53    | 0.50      | 0.87 | 0.91    | -0.13  | 0.53    | 0.50      | 0.86 | 0.93    | -0.14  | 0.51    | 0.55      | 0.84 | 0.95    |
| Acidimicrococcus              | -0.11  | 0.07    | 0.49      | 0.30 | 0.91    | -0.06  | 0.29    | 0.50      | 0.60 | 0.95    | -0.06  | 0.35    | 0.84      | 0.81 | 0.99    | -0.06  | 0.36    | 0.86      | 0.82 | 0.98    | -0.05  | 0.39    | 0.81      | 0.84 | 0.98    |
| Actinomycetes                 | -0.02  | 0.90    | 0.53      | 0.95 | 0.91    | -0.01  | 0.97    | 0.67      | 0.98 | 0.95    | 0.02   | 0.91    | 0.97      | 0.96 | 0.99    | 0.00   | 0.99    | 0.92      | 0.99 | 0.98    | 0.01   | 0.94    | 0.90      | 0.96 | 0.98    |
| Adlercreutzia                 | -0.06  | 0.57    | 0.17      | 0.72 | 0.80    | -0.04  | 0.65    | 0.32      | 0.73 | 0.80    | -0.04  | 0.69    | 0.53      | 0.90 | 0.93    | -0.04  | 0.72    | 0.59      | 0.89 | 0.97    | -0.04  | 0.70    | 0.61      | 0.89 | 0.97    |
| Agathobacter                  | 0.15   | 0.31    | 0.17      | 0.51 | 0.80    | 0.08   | 0.55    | 0.32      | 0.72 | 0.80    | 0.01   | 0.97    | 0.37      | 0.99 | 0.80    | 0.02   | 0.90    | 0.36      | 0.96 | 0.79    | 0.01   | 0.92    | 0.43      | 0.96 | 0.87    |
| Akkermansia                   | 0.05   | 0.48    | 0.29      | 0.65 | 0.91    | -0.02  | 0.80    | 0.10      | 0.84 | 0.52    | -0.05  | 0.49    | 0.06      | 0.87 | 0.50    | -0.05  | 0.52    | 0.07      | 0.86 | 0.53    | -0.05  | 0.49    | 0.07      | 0.84 | 0.56    |
| Alistipes                     | 0.22   | 0.09    | 0.54      | 0.31 | 0.91    | 0.11   | 0.36    | 0.96      | 0.60 | 0.97    | 0.03   | 0.83    | 0.85      | 0.94 | 0.99    | 0.03   | 0.80    | 0.89      | 0.94 | 0.98    | 0.02   | 0.87    | 0.86      | 0.96 | 0.98    |
| Allisonella                   | -0.03  | 0.81    | 0.05      | 0.86 | 0.74    | 0.10   | 0.36    | 0.08      | 0.60 | 0.52    | -0.09  | 0.45    | 0.23      | 0.87 | 0.73    | 0.09   | 0.46    | 0.26      | 0.86 | 0.75    | 0.09   | 0.44    | 0.25      | 0.84 | 0.72    |
| Anaerofilum                   | 0.00   | 0.99    | 0.10      | 0.99 | 0.75    | -0.09  | 0.54    | 0.17      | 0.72 | 0.67    | -0.10  | 0.52    | 0.20      | 0.87 | 0.73    | -0.10  | 0.51    | 0.21      | 0.86 | 0.74    | -0.11  | 0.49    | 0.20      | 0.84 | 0.72    |
| Anaerostipes                  | 0.07   | 0.67    | 0.71      | 0.78 | 0.91    | -0.02  | 0.87    | 0.94      | 0.90 | 0.97    | 0.02   | 0.89    | 0.60      | 0.96 | 0.99    | 0.03   | 0.84    | 0.54      | 0.94 | 0.95    | 0.03   | 0.85    | 0.63      | 0.96 | 0.97    |
| Anaerotruncus                 | -0.11  | 0.45    | 0.09      | 0.64 | 0.75    | -0.19  | 0.16    | 0.03      | 0.50 | 0.51    | -0.21  | 0.13    | 0.03      | 0.60 | 0.50    | -0.22  | 0.12    | 0.03      | 0.54 | 0.53    | -0.22  | 0.11    | 0.03      | 0.53 | 0.44    |
| Bacteroides                   | 0.06   | 0.77    | 0.67      | 0.84 | 0.91    | 0.01   | 0.95    | 0.63      | 0.97 | 0.95    | 0.01   | 0.95    | 0.62      | 0.98 | 0.99    | 0.03   | 0.90    | 0.61      | 0.96 | 0.97    | 0.02   | 0.92    | 0.59      | 0.96 | 0.97    |
| Barnesiella                   | 0.16   | 0.01    | 0.89      | 0.16 | 0.93    | 0.17   | 0.01    | 0.95      | 0.18 | 0.97    | 0.14   | 0.03    | 0.74      | 0.40 | 0.99    | 0.14   | 0.03    | 0.75      | 0.40 | 0.98    | 0.14   | 0.03    | 0.70      | 0.38 | 0.98    |
| Bifidobacterium               | -0.05  | 0.53    | 0.72      | 0.68 | 0.91    | 0.02   | 0.84    | 0.73      | 0.88 | 0.95    | -0.01  | 0.92    | 0.61      | 0.96 | 0.99    | 0.00   | 0.96    | 0.62      | 0.97 | 0.97    | -0.01  | 0.94    | 0.61      | 0.96 | 0.97    |
| Bifilophila                   | 0.14   | 0.14    | 0.90      | 0.36 | 0.93    | 0.06   | 0.50    | 0.58      | 0.72 | 0.95    | 0.03   | 0.72    | 0.56      | 0.90 | 0.97    | 0.04   | 0.67    | 0.62      | 0.89 | 0.97    | 0.04   | 0.67    | 0.68      | 0.89 | 0.98    |
| Blautia                       | 0.10   | 0.75    | 0.77      | 0.83 | 0.91    | -0.16  | 0.58    | 0.70      | 0.73 | 0.95    | -0.11  | 0.71    | 0.69      | 0.90 | 0.99    | -0.11  | 0.72    | 0.72      | 0.89 | 0.98    | -0.11  | 0.72    | 0.55      | 0.89 | 0.95    |
| Butyrivibrio                  | 0.35   | 0.12    | 0.42      | 0.35 | 0.91    | 0.12   | 0.57    | 0.60      | 0.72 | 0.95    | 0.07   | 0.75    | 0.47      | 0.90 | 0.90    | 0.08   | 0.73    | 0.46      | 0.89 | 0.93    | 0.08   | 0.73    | 0.48      | 0.89 | 0.92    |
| Butyrivibrio                  | 0.00   | 0.96    | 0.11      | 0.98 | 0.75    | -0.04  | 0.57    | 0.05      | 0.72 | 0.51    | -0.04  | 0.60    | 0.08      | 0.87 | 0.52    | -0.04  | 0.60    | 0.07      | 0.86 | 0.53    | -0.04  | 0.56    | 0.07      | 0.84 | 0.56    |
| CAG_56                        | 0.13   | 0.12    | 0.40      | 0.35 | 0.91    | 0.08   | 0.33    | 0.52      | 0.60 | 0.95    | 0.04   | 0.63    | 0.63      | 0.87 | 0.99    | 0.04   | 0.64    | 0.64      | 0.87 | 0.98    | 0.04   | 0.65    | 0.71      | 0.88 | 0.98    |
| Candidatus_Soleaferrea        | -0.12  | 0.46    | 0.34      | 0.64 | 0.91    | -0.24  | 0.13    | 0.13      | 0.49 | 0.65    | -0.27  | 0.10    | 0.07      | 0.55 | 0.50    | -0.27  | 0.11    | 0.07      | 0.54 | 0.53    | -0.27  | 0.10    | 0.07      | 0.51 | 0.56    |
| Caproiciproducens             | -0.16  | 0.31    | 0.16      | 0.51 | 0.80    | -0.19  | 0.19    | 0.07      | 0.56 | 0.51    | -0.26  | 0.09    | 0.07      | 0.52 | 0.50    | -0.25  | 0.09    | 0.07      | 0.53 | 0.53    | -0.25  | 0.10    | 0.08      | 0.51 | 0.56    |
| Christensenellaceae_R.7_group | 0.13   | 0.08    | 0.51      | 0.31 | 0.91    | 0.08   | 0.22    | 0.55      | 0.58 | 0.95    | 0.06   | 0.43    | 0.73      | 0.87 | 0.99    | 0.06   | 0.44    | 0.76      | 0.86 | 0.98    | 0.05   | 0.45    | 0.70      | 0.84 | 0.98    |
| Clostridium_sensu_stricto_1   | 0.08   | 0.36    | 0.57      | 0.55 | 0.91    | 0.12   | 0.13    | 0.30      | 0.49 | 0.80    | 0.14   | 0.12    | 0.21      | 0.59 | 0.73    | 0.14   | 0.11    | 0.20      | 0.54 | 0.74    | 0.15   | 0.10    | 0.14      | 0.51 | 0.72    |
| Collidextribacter             | -0.20  | 0.25    | 0.41      | 0.47 | 0.91    | -0.32  | 0.05    | 0.16      | 0.30 | 0.67    | -0.29  | 0.08    | 0.27      | 0.50 | 0.75    | -0.29  | 0.09    | 0.30      | 0.52 | 0.75    | -0.29  | 0.09    | 0.22      | 0.51 | 0.72    |
| Collinsella                   | 0.00   | 0.96    | 0.27      | 0.98 | 0.91    | 0.05   | 0.57    | 0.57      | 0.72 | 0.95    | 0.02   | 0.79    | 0.81      | 0.92 | 0.99    | 0.02   | 0.82    | 0.87      | 0.94 | 0.98    | 0.02   | 0.81    | 0.81      | 0.95 | 0.98    |
| Coprobacter                   | 0.13   | 0.14    | 0.30      | 0.36 | 0.91    | 0.10   | 0.23    | 0.22      | 0.59 | 0.71    | 0.05   | 0.55    | 0.24      | 0.87 | 0.73    | 0.05   | 0.56    | 0.23      | 0.86 | 0.74    | 0.05   | 0.58    | 0.25      | 0.84 | 0.72    |
| Coprococcus                   | 0.29   | 0.01    | 0.02      | 0.11 | 0.54    | 0.20   | 0.04    | 0.18      | 0.30 | 0.67    | 0.19   | 0.06    | 0.17      | 0.45 | 0.73    | 0.19   | 0.06    | 0.18      | 0.48 | 0.74    | 0.18   | 0.07    | 0.23      | 0.50 | 0.72    |
| Defluviitaleaceae_UCG.011     | 0.19   | 0.20    | 0.49      | 0.45 | 0.91    | 0.19   | 0.15    | 0.83      | 0.50 | 0.97    | 0.20   | 0.15    | 0.94      | 0.65 | 0.99    | 0.20   | 0.15    | 0.90      | 0.58 | 0.98    | 0.20   | 0.15    | 0.87      | 0.63 | 0.98    |
| Desulfobivrio                 | -0.05  | 0.50    | 0.76      | 0.65 | 0.91    | -0.04  | 0.54    | 0.72      | 0.72 | 0.95    | -0.06  | 0.44    | 0.65      | 0.87 | 0.99    | -0.07  | 0.37    | 0.60      | 0.82 | 0.97    | -0.07  | 0.35    | 0.54      | 0.81 | 0.95    |
| Dialister                     | 0.02   | 0.76    | 0.37      | 0.83 | 0.91    | 0.03   | 0.65    | 0.30      | 0.73 | 0.80    | 0.03   | 0.62    | 0.34      | 0.87 | 0.77    | 0.03   | 0.60    | 0.32      | 0.86 | 0.75    | 0.03   | 0.59    | 0.35      | 0.84 | 0.80    |
| DNF00809                      | 0.11   | 0.49    | 0.86      | 0.65 | 0.92    | 0.07   | 0.65    | 0.92      | 0.73 | 0.97    | 0.10   | 0.51    | 0.77      | 0.87 | 0.99    | 0.10   | 0.55    | 0.80      | 0.86 | 0.98    | 0.10   | 0.53    | 0.76      | 0.84 | 0.98    |
| Dorea                         | 0.16   | 0.23    | 0.11      | 0.45 | 0.75    | 0.11   | 0.37    | 0.33      | 0.60 | 0.80    | 0.14   | 0.26    | 0.22      | 0.78 | 0.73    | 0.14   | 0.27    | 0.24      | 0.80 | 0.74    | 0.14   | 0.28    | 0.22      | 0.81 | 0.72    |
| DTU089                        | 0.04   | 0.74    | 0.93      | 0.83 | 0.95    | 0.03   | 0.78    | 0.80      | 0.84 | 0.97    | 0.00   | 0.98    | 0.98      | 0.99 | 0.99    | -0.01  | 0.93    | 0.95      | 0.96 | 0.98    | -0.01  | 0.95    | 0.86      | 0.96 | 0.98    |
| Eggerthella                   | -0.09  | 0.48    | 0.62      | 0.65 | 0.91    | -0.14  | 0.21    | 0.35      | 0.58 | 0.80    | -0.08  | 0.51    | 0.51      | 0.87 | 0.91    | -0.08  | 0.49    | 0.51      | 0.86 | 0.93    | -0.08  | 0.48    | 0.42      | 0.84 | 0.87    |
| Eisenbergiella                | -0.29  | 0.02    | 0.01      | 0.18 | 0.53    | -0.30  | 0.01    | 0.00      | 0.18 | 0.11    | -0.31  | 0.01    | 0.01      | 0.29 | 0.18    | -0.31  | 0.01    | 0.01      | 0.25 | 0.20    | -0.31  | 0.01    | 0.00      | 0.24 | 0.13    |
| Erysipelatoclostridium        | -0.23  | 0.06    | 0.06      | 0.30 | 0.74    | -0.21  | 0.06    | 0.06      | 0.35 | 0.51    | -0.17  | 0.16    | 0.11      | 0.66 | 0.69    | -0.17  | 0.15    | 0.12      | 0.58 | 0.72    | -0.17  | 0.15    | 0.11      | 0.63 | 0.63    |
| Erysipelotrichaceae_UCG.003   | 0.10   | 0.27    | 0.66      | 0.48 | 0.91    | 0.08   | 0.34    | 0.71      | 0.60 | 0.95    | 0.05   | 0.60    | 0.70      | 0.87 | 0.99    | 0.05   | 0.58    | 0.65      | 0.86 | 0.98    | 0.05   | 0.57    | 0.62      | 0.84 | 0.97    |
| Escherichia_Shigella          | -0.14  | 0.10    | 0.24      | 0.32 | 0.91    | -0.08  | 0.35    | 0.34      | 0.60 | 0.80    | -0.10  | 0.25    | 0.13      | 0.78 | 0.72    | -0.10  | 0.26    | 0.13      | 0.80 | 0.72    | -0.10  | 0.23    | 0.11      | 0.72 | 0.64    |
| Faecalicoccus                 | 0.23   | 0.12    | 0.82      | 0.35 | 0.91    | 0.23   | 0.09    | 0.45      | 0.40 | 0.94    | 0.30   | 0.05    | 0.14      | 0.41 | 0.72    | 0.30   | 0.05    | 0.15      | 0.40 | 0.72    | 0.30   | 0.04    | 0.16      | 0.40 | 0.72    |
| Family_XIII_AD3011_group      | 0.27   | 0.03    | 0.50      | 0.20 | 0.91    | 0.13   | 0.26    | 0.94      | 0.59 | 0.97    | 0.08   | 0.54    | 0.93      | 0.87 | 0.99    | 0.07   | 0.58    | 0.94      | 0.86 | 0.98    | 0.06   | 0.61    | 0.97      | 0.86 | 0.98    |
| Family_XIII_UCG.001           | 0.14   | 0.30    | 0.72      | 0.51 | 0.91    | 0.08   | 0.55    | 0.64      | 0.72 | 0.95    | 0.05   | 0.71    | 0.76      | 0.90 | 0.99    | 0.04   | 0.76    | 0.75      | 0.91 | 0.98    | 0.04   | 0.76    | 0.76      | 0.90 | 0.98    |
| FD2005                        | -0.15  | 0.24    | 0.33      | 0.46 | 0.91    | -0.11  | 0.35    | 0.27      | 0.60 | 0.80    | -0.12  | 0.31    | 0.22      | 0.78 | 0.73    | -0.12  | 0.34    | 0.24      | 0.82 | 0.74    | -0.12  | 0.33    | 0.22      | 0.81 | 0.72    |
| Flavonifractor                | -0.16  | 0.15    | 0.62      | 0.36 | 0.91    | -0.16  | 0.13    | 0.56      | 0.49 | 0.95    | -0.11  | 0.30    | 0.60      | 0.78 | 0.99    | -0.11  | 0.31    | 0.59      | 0.80 | 0.97    | -0.11  | 0.32    | 0.56      | 0.81 | 0.95    |
| Fournierella                  | 0.06   | 0.62    | 0.80      | 0.77 | 0.91    | 0.05   | 0.64    | 0.69      | 0.73 | 0.95    | 0.03   | 0.79    | 0.65      | 0.92 | 0.99    | 0.03   | 0.82    | 0.63      | 0.94 | 0.97    | 0.03   | 0.83    | 0.74      | 0.96 | 0.98    |
| Frisingococcus                | -0.13  | 0.23    | 0.06      | 0.45 | 0.74    | -0.10  | 0.33    | 0.22      | 0.60 | 0.71    | -0.13  | 0.22    | 0.27      | 0.74 | 0.75    | -0.13  | 0.23    | 0.30      | 0.74 | 0.75    | -0.13  | 0.23    | 0.27      | 0.72 | 0.72    |
| Fusicatenibacter              | 0.11   | 0.34    | 0.59      | 0.54 | 0.91    | 0.08   | 0.41    | 0.42      | 0.62 | 0.93    | 0.05   | 0.66    | 0.42      | 0.89 | 0.89    | 0.05   | 0.62    | 0.42      | 0.87 | 0.88    | 0.05   | 0.64    | 0.40      | 0.88 | 0.86    |
| Fusobacterium                 | -0.18  | 0.13    | 0.25      | 0.35 | 0.91    | -0.12  | 0.26    | 0.18      | 0.59 | 0.67    | -0.05  | 0.63    | 0.14      | 0.87 | 0.72    | -0.06  | 0.60    | 0.14      | 0.86 | 0.72    | -0.06  | 0.57    | 0.12      | 0.84 | 0.65    |
| GCA.900066575                 | 0.13   | 0.33    | 0.61      | 0.52 | 0.91    | 0.04   | 0.72    | 0.62      | 0.78 | 0.95    | 0.02   | 0.90    | 0.88      | 0.96 | 0.99    | 0.01   | 0.92    | 0.93      | 0.96 | 0.98    | 0.01   | 0.95    | 0.94      | 0.96 | 0.98    |
| Gordonibacter                 | -0.06  | 0.67    | 0.16      | 0.78 | 0.80    | -0.12  | 0.35    | 0.09      | 0.60 | 0.52    | -0.08  | 0.57    | 0.30      | 0.87 | 0.75    | -0.09  | 0.54    | 0.31      | 0.86 | 0.75    | -0.09  | 0.54    | 0.32      | 0.84 | 0.78    |
| Granulicatella                | -0.15  | 0.43    | 0.46      | 0.62 | 0.91    | -0.09  | 0.62    | 0.65      | 0.73 | 0.95    | -0.06  | 0.74    | 0.69      | 0.90 | 0.99    | -0.07  | 0.70    | 0.62      | 0.89 | 0.97    | -0.07  | 0.72    | 0.58      | 0.89 | 0.96    |

|                       |       |      |      |      |      |       |      |      |      |      |       |      |      |      |      |       |      |      |      |      |       |      |      |      |      |
|-----------------------|-------|------|------|------|------|-------|------|------|------|------|-------|------|------|------|------|-------|------|------|------|------|-------|------|------|------|------|
| Monoglobus            | 0.25  | 0.03 | 0.71 | 0.20 | 0.91 | 0.19  | 0.06 | 0.63 | 0.35 | 0.95 | 0.12  | 0.28 | 0.48 | 0.78 | 0.90 | 0.12  | 0.28 | 0.50 | 0.80 | 0.93 | 0.12  | 0.28 | 0.45 | 0.81 | 0.88 |
| Moryella              | 0.31  | 0.05 | 0.49 | 0.25 | 0.91 | 0.24  | 0.09 | 0.35 | 0.40 | 0.80 | 0.14  | 0.34 | 0.46 | 0.81 | 0.90 | 0.14  | 0.35 | 0.48 | 0.82 | 0.93 | 0.14  | 0.36 | 0.51 | 0.81 | 0.95 |
| Negativibacillus      | -0.19 | 0.07 | 0.12 | 0.30 | 0.75 | -0.24 | 0.02 | 0.02 | 0.21 | 0.41 | -0.26 | 0.01 | 0.01 | 0.29 | 0.24 | -0.26 | 0.01 | 0.01 | 0.25 | 0.26 | -0.26 | 0.01 | 0.01 | 0.24 | 0.28 |
| NK4A214_group         | 0.08  | 0.32 | 0.77 | 0.51 | 0.91 | 0.01  | 0.85 | 0.48 | 0.89 | 0.95 | -0.04 | 0.59 | 0.37 | 0.87 | 0.80 | -0.05 | 0.57 | 0.38 | 0.86 | 0.81 | -0.05 | 0.54 | 0.32 | 0.84 | 0.78 |
| Odoribacter           | 0.10  | 0.21 | 0.86 | 0.45 | 0.92 | 0.09  | 0.22 | 0.90 | 0.58 | 0.97 | 0.05  | 0.56 | 0.99 | 0.87 | 0.99 | 0.05  | 0.54 | 0.96 | 0.86 | 0.98 | 0.04  | 0.58 | 0.97 | 0.84 | 0.98 |
| Oscillibacter         | 0.16  | 0.23 | 0.72 | 0.45 | 0.91 | 0.12  | 0.34 | 0.73 | 0.60 | 0.95 | 0.06  | 0.66 | 0.49 | 0.89 | 0.90 | 0.05  | 0.69 | 0.50 | 0.89 | 0.93 | 0.06  | 0.67 | 0.53 | 0.89 | 0.95 |
| Oscillospira          | 0.11  | 0.54 | 0.80 | 0.69 | 0.91 | 0.07  | 0.67 | 0.92 | 0.73 | 0.97 | 0.06  | 0.74 | 0.72 | 0.90 | 0.99 | 0.05  | 0.76 | 0.72 | 0.91 | 0.98 | 0.06  | 0.74 | 0.64 | 0.89 | 0.97 |
| Oxalobacter           | 0.33  | 0.01 | 0.31 | 0.14 | 0.91 | 0.22  | 0.07 | 0.23 | 0.36 | 0.71 | 0.18  | 0.15 | 0.18 | 0.65 | 0.73 | 0.18  | 0.15 | 0.18 | 0.58 | 0.74 | 0.17  | 0.18 | 0.22 | 0.66 | 0.72 |
| Paludicola            | 0.28  | 0.04 | 0.46 | 0.22 | 0.91 | 0.11  | 0.39 | 0.97 | 0.61 | 0.97 | 0.03  | 0.82 | 0.97 | 0.94 | 0.99 | 0.02  | 0.88 | 0.99 | 0.96 | 0.99 | 0.02  | 0.87 | 0.89 | 0.96 | 0.98 |
| Parabacteroides       | 0.04  | 0.65 | 0.82 | 0.78 | 0.91 | 0.10  | 0.25 | 0.69 | 0.59 | 0.95 | 0.10  | 0.26 | 0.76 | 0.78 | 0.99 | 0.10  | 0.30 | 0.85 | 0.80 | 0.98 | 0.10  | 0.29 | 0.88 | 0.81 | 0.98 |
| Paraprevotella        | 0.00  | 0.96 | 0.35 | 0.98 | 0.91 | 0.03  | 0.63 | 0.29 | 0.73 | 0.80 | 0.03  | 0.59 | 0.18 | 0.87 | 0.73 | 0.03  | 0.64 | 0.20 | 0.87 | 0.74 | 0.04  | 0.59 | 0.18 | 0.84 | 0.72 |
| Parasutterella        | 0.17  | 0.02 | 0.83 | 0.19 | 0.91 | 0.16  | 0.01 | 0.58 | 0.21 | 0.95 | 0.09  | 0.20 | 0.97 | 0.71 | 0.99 | 0.09  | 0.19 | 0.95 | 0.66 | 0.98 | 0.09  | 0.21 | 0.89 | 0.70 | 0.98 |
| Peptococcus           | -0.03 | 0.80 | 0.08 | 0.85 | 0.74 | -0.13 | 0.28 | 0.04 | 0.60 | 0.51 | -0.19 | 0.13 | 0.05 | 0.60 | 0.50 | -0.19 | 0.12 | 0.05 | 0.54 | 0.53 | -0.20 | 0.11 | 0.04 | 0.53 | 0.50 |
| Phascolarctobacterium | 0.03  | 0.64 | 0.35 | 0.78 | 0.91 | 0.03  | 0.66 | 0.20 | 0.73 | 0.69 | 0.03  | 0.61 | 0.28 | 0.87 | 0.75 | 0.03  | 0.64 | 0.28 | 0.87 | 0.75 | 0.03  | 0.65 | 0.28 | 0.88 | 0.72 |
| Phocaea               | -0.24 | 0.14 | 0.44 | 0.36 | 0.91 | -0.34 | 0.02 | 0.17 | 0.25 | 0.67 | -0.42 | 0.01 | 0.06 | 0.27 | 0.50 | -0.42 | 0.01 | 0.06 | 0.25 | 0.53 | -0.42 | 0.01 | 0.05 | 0.24 | 0.53 |
| Prevotella            | -0.07 | 0.23 | 0.60 | 0.45 | 0.91 | -0.05 | 0.35 | 0.95 | 0.60 | 0.97 | -0.04 | 0.43 | 0.86 | 0.87 | 0.99 | -0.04 | 0.41 | 0.90 | 0.86 | 0.98 | -0.04 | 0.42 | 0.93 | 0.84 | 0.98 |
| Romboutsia            | 0.09  | 0.40 | 0.41 | 0.60 | 0.91 | 0.14  | 0.16 | 0.26 | 0.50 | 0.80 | 0.12  | 0.24 | 0.30 | 0.78 | 0.75 | 0.12  | 0.23 | 0.29 | 0.74 | 0.75 | 0.13  | 0.21 | 0.27 | 0.70 | 0.72 |
| Roseburia             | 0.35  | 0.01 | 0.03 | 0.14 | 0.60 | 0.25  | 0.05 | 0.10 | 0.30 | 0.52 | 0.13  | 0.35 | 0.33 | 0.81 | 0.77 | 0.13  | 0.34 | 0.32 | 0.82 | 0.75 | 0.13  | 0.35 | 0.40 | 0.81 | 0.86 |
| Ruminococcus          | 0.10  | 0.21 | 0.55 | 0.45 | 0.91 | 0.06  | 0.41 | 0.76 | 0.62 | 0.97 | 0.02  | 0.83 | 0.68 | 0.94 | 0.99 | 0.02  | 0.83 | 0.70 | 0.94 | 0.98 | 0.02  | 0.82 | 0.67 | 0.96 | 0.98 |
| Sellimonas            | 0.16  | 0.15 | 0.96 | 0.37 | 0.97 | 0.19  | 0.07 | 0.45 | 0.38 | 0.94 | 0.19  | 0.08 | 0.35 | 0.50 | 0.78 | 0.19  | 0.08 | 0.34 | 0.51 | 0.77 | 0.19  | 0.08 | 0.35 | 0.50 | 0.80 |
| Senegalimassilia      | 0.05  | 0.66 | 0.62 | 0.78 | 0.91 | 0.04  | 0.67 | 0.69 | 0.73 | 0.95 | 0.02  | 0.86 | 0.85 | 0.95 | 0.99 | 0.01  | 0.91 | 0.90 | 0.96 | 0.98 | 0.01  | 0.91 | 0.94 | 0.96 | 0.98 |
| Shuttleworthia        | 0.16  | 0.24 | 0.74 | 0.46 | 0.91 | 0.08  | 0.51 | 0.90 | 0.72 | 0.97 | 0.04  | 0.76 | 0.86 | 0.90 | 0.99 | 0.05  | 0.73 | 0.79 | 0.89 | 0.98 | 0.05  | 0.71 | 0.83 | 0.89 | 0.98 |
| Slackia               | -0.08 | 0.39 | 0.85 | 0.58 | 0.92 | -0.04 | 0.64 | 0.95 | 0.73 | 0.97 | -0.06 | 0.49 | 0.87 | 0.87 | 0.99 | -0.07 | 0.45 | 0.79 | 0.86 | 0.98 | -0.07 | 0.43 | 0.87 | 0.84 | 0.98 |
| Streptococcus         | 0.11  | 0.45 | 0.83 | 0.64 | 0.91 | 0.10  | 0.45 | 0.83 | 0.66 | 0.97 | 0.14  | 0.33 | 0.85 | 0.80 | 0.99 | 0.12  | 0.38 | 0.94 | 0.84 | 0.98 | 0.14  | 0.35 | 0.91 | 0.81 | 0.98 |
| Subdoligranulum       | 0.19  | 0.08 | 0.60 | 0.31 | 0.91 | 0.14  | 0.15 | 0.62 | 0.50 | 0.95 | 0.11  | 0.28 | 0.74 | 0.78 | 0.99 | 0.11  | 0.30 | 0.72 | 0.80 | 0.98 | 0.11  | 0.30 | 0.67 | 0.81 | 0.98 |
| Sutterella            | -0.09 | 0.16 | 0.48 | 0.39 | 0.91 | -0.05 | 0.39 | 0.57 | 0.61 | 0.95 | 0.00  | 1.00 | 1.00 | 1.00 | 0.73 | 0.00  | 0.96 | 0.19 | 0.97 | 0.74 | 0.00  | 0.99 | 0.16 | 0.99 | 0.72 |
| TM7x                  | -0.05 | 0.76 | 0.84 | 0.83 | 0.92 | -0.11 | 0.44 | 0.90 | 0.65 | 0.97 | -0.02 | 0.87 | 0.74 | 0.95 | 0.99 | -0.03 | 0.84 | 0.77 | 0.94 | 0.98 | -0.03 | 0.85 | 0.85 | 0.96 | 0.98 |
| Turicibacter          | 0.28  | 0.04 | 0.25 | 0.22 | 0.91 | 0.39  | 0.00 | 0.08 | 0.09 | 0.52 | 0.41  | 0.00 | 0.15 | 0.10 | 0.72 | 0.41  | 0.00 | 0.13 | 0.08 | 0.72 | 0.42  | 0.00 | 0.09 | 0.07 | 0.56 |
| Tuzzerella            | -0.12 | 0.23 | 0.50 | 0.45 | 0.91 | -0.12 | 0.21 | 0.30 | 0.58 | 0.80 | -0.14 | 0.18 | 0.33 | 0.66 | 0.77 | -0.14 | 0.18 | 0.36 | 0.66 | 0.79 | -0.13 | 0.19 | 0.42 | 0.68 | 0.87 |
| UBA1819               | -0.24 | 0.12 | 0.02 | 0.35 | 0.54 | -0.30 | 0.04 | 0.00 | 0.29 | 0.11 | -0.30 | 0.04 | 0.00 | 0.41 | 0.11 | -0.31 | 0.04 | 0.00 | 0.40 | 0.11 | -0.31 | 0.04 | 0.00 | 0.40 | 0.08 |
| UCG.002               | 0.03  | 0.67 | 0.26 | 0.78 | 0.91 | -0.03 | 0.66 | 0.14 | 0.73 | 0.67 | -0.06 | 0.49 | 0.31 | 0.87 | 0.75 | -0.06 | 0.46 | 0.31 | 0.86 | 0.75 | -0.06 | 0.43 | 0.27 | 0.84 | 0.72 |
| UCG.003               | 0.16  | 0.05 | 0.46 | 0.26 | 0.91 | 0.09  | 0.25 | 0.54 | 0.59 | 0.95 | 0.06  | 0.49 | 0.47 | 0.87 | 0.90 | 0.05  | 0.52 | 0.50 | 0.86 | 0.93 | 0.05  | 0.54 | 0.45 | 0.84 | 0.88 |
| UCG.005               | 0.15  | 0.10 | 0.81 | 0.32 | 0.91 | 0.11  | 0.22 | 0.90 | 0.58 | 0.97 | 0.06  | 0.52 | 0.97 | 0.87 | 0.99 | 0.06  | 0.56 | 0.97 | 0.86 | 0.98 | 0.06  | 0.55 | 0.99 | 0.84 | 0.99 |
| UCG.009               | 0.16  | 0.26 | 0.77 | 0.47 | 0.91 | 0.08  | 0.53 | 0.50 | 0.72 | 0.95 | -0.01 | 0.92 | 0.73 | 0.96 | 0.99 | -0.02 | 0.90 | 0.74 | 0.96 | 0.98 | -0.02 | 0.89 | 0.78 | 0.96 | 0.98 |
| Veillonella           | 0.16  | 0.09 | 0.16 | 0.31 | 0.80 | 0.18  | 0.04 | 0.07 | 0.30 | 0.51 | 0.16  | 0.08 | 0.07 | 0.50 | 0.50 | 0.16  | 0.08 | 0.08 | 0.51 | 0.53 | 0.17  | 0.08 | 0.08 | 0.50 | 0.56 |
| Victivallis           | 0.13  | 0.17 | 0.81 | 0.40 | 0.91 | 0.08  | 0.34 | 0.94 | 0.60 | 0.97 | 0.04  | 0.69 | 0.87 | 0.90 | 0.99 | 0.04  | 0.69 | 0.82 | 0.89 | 0.98 | 0.04  | 0.69 | 0.89 | 0.89 | 0.98 |

Multivariable-adjusted regression models adjusted for:

Model 1: sequencing batch, age, race, gender, study center

Model 2: Model 1, with education

Model 3: Model 2, with physical activity, diet score, medication use, and smoking

Model 4: Model 3 with BMI

Model 5: Model 4 with hypertension and diabetes



eTable 47: Multivariable-adjusted regression coefficients, p-values, and false discovery rate (FDR)-adjusted p-values for genera among male participants with respect to DSST.

|                               | Model1 |         |      | Model2 |         |      | Model3 |         |      | Model4 |         |      | Model5 |         |      |
|-------------------------------|--------|---------|------|--------|---------|------|--------|---------|------|--------|---------|------|--------|---------|------|
|                               | beta   | p-value | FDR  | beta   | p-value | FDR  | beta   | p-value | FDR  | beta   | p-value | FDR  | beta   | p-value | FDR  |
| Acetanaerobacterium           | 0.80   | 0.70    | 0.82 | 0.54   | 0.77    | 0.90 | 0.56   | 0.77    | 0.94 | 0.51   | 0.79    | 0.96 | 0.66   | 0.73    | 0.94 |
| Acidaminococcus               | 0.17   | 0.77    | 0.86 | 0.67   | 0.23    | 0.51 | 0.90   | 0.12    | 0.85 | 0.78   | 0.18    | 0.77 | 0.68   | 0.25    | 0.75 |
| Actinomyces                   | -1.17  | 0.49    | 0.66 | -1.03  | 0.51    | 0.72 | -0.51  | 0.76    | 0.94 | 0.02   | 0.99    | 1.00 | -0.43  | 0.80    | 0.97 |
| Adlercreutzia                 | 0.29   | 0.77    | 0.86 | 0.46   | 0.61    | 0.81 | 0.70   | 0.45    | 0.89 | 0.61   | 0.50    | 0.84 | 0.73   | 0.43    | 0.81 |
| Agathobacter                  | 0.93   | 0.50    | 0.67 | 0.15   | 0.90    | 0.94 | -0.57  | 0.66    | 0.91 | -1.03  | 0.43    | 0.81 | -1.09  | 0.40    | 0.81 |
| Akkermansia                   | 1.68   | 0.01    | 0.10 | 1.04   | 0.11    | 0.47 | 1.03   | 0.12    | 0.85 | 0.97   | 0.15    | 0.77 | 1.03   | 0.12    | 0.75 |
| Alistipes                     | 2.51   | 0.04    | 0.16 | 1.54   | 0.17    | 0.51 | 1.19   | 0.30    | 0.85 | 1.12   | 0.32    | 0.77 | 1.50   | 0.19    | 0.75 |
| Allisonella                   | -0.01  | 0.99    | 0.99 | 1.15   | 0.27    | 0.54 | 0.64   | 0.56    | 0.91 | 0.59   | 0.59    | 0.90 | 0.53   | 0.63    | 0.91 |
| Anaerofilum                   | 2.34   | 0.11    | 0.33 | 1.47   | 0.29    | 0.54 | 1.62   | 0.25    | 0.85 | 1.56   | 0.26    | 0.77 | 1.63   | 0.24    | 0.75 |
| Anaerostipes                  | 2.49   | 0.13    | 0.36 | 1.48   | 0.34    | 0.57 | 1.67   | 0.29    | 0.85 | 1.48   | 0.34    | 0.77 | 1.26   | 0.42    | 0.81 |
| Anaerotruncus                 | 1.58   | 0.24    | 0.47 | 0.84   | 0.50    | 0.72 | 1.11   | 0.39    | 0.88 | 1.44   | 0.26    | 0.77 | 1.55   | 0.22    | 0.75 |
| Bacteroides                   | -1.26  | 0.55    | 0.70 | -1.37  | 0.48    | 0.72 | 0.16   | 0.94    | 0.98 | -0.24  | 0.90    | 0.99 | 0.05   | 0.98    | 0.99 |
| Barnesiella                   | 1.56   | 0.01    | 0.10 | 1.65   | 0.00    | 0.31 | 1.19   | 0.05    | 0.71 | 1.21   | 0.04    | 0.61 | 1.19   | 0.04    | 0.51 |
| Bifidobacterium               | -0.36  | 0.65    | 0.80 | 0.18   | 0.81    | 0.92 | 0.12   | 0.87    | 0.97 | 0.00   | 1.00    | 1.00 | -0.08  | 0.91    | 0.99 |
| Bilophila                     | 0.47   | 0.60    | 0.76 | -0.29  | 0.73    | 0.88 | -0.55  | 0.53    | 0.91 | -0.83  | 0.34    | 0.77 | -0.71  | 0.42    | 0.81 |
| Blautia                       | 7.43   | 0.01    | 0.10 | 5.27   | 0.05    | 0.33 | 5.97   | 0.03    | 0.71 | 6.05   | 0.03    | 0.61 | 6.13   | 0.02    | 0.51 |
| Butyricoccus                  | 4.88   | 0.03    | 0.16 | 2.51   | 0.24    | 0.51 | 2.53   | 0.24    | 0.85 | 2.57   | 0.23    | 0.77 | 2.40   | 0.27    | 0.75 |
| Butyricimonas                 | 1.10   | 0.15    | 0.37 | 0.75   | 0.29    | 0.54 | 0.85   | 0.23    | 0.85 | 0.84   | 0.23    | 0.77 | 0.99   | 0.16    | 0.75 |
| CAG.56                        | 0.49   | 0.54    | 0.70 | 0.01   | 0.99    | 0.99 | -0.24  | 0.75    | 0.94 | -0.21  | 0.78    | 0.96 | -0.06  | 0.94    | 0.99 |
| Candidatus_Soleaferrea        | 1.27   | 0.42    | 0.66 | 0.20   | 0.89    | 0.94 | -0.10  | 0.95    | 0.98 | -0.04  | 0.98    | 1.00 | -0.01  | 0.99    | 0.99 |
| Caproiciproducens             | 0.03   | 0.98    | 0.99 | -0.35  | 0.80    | 0.92 | 0.10   | 0.94    | 0.98 | 0.03   | 0.98    | 1.00 | -0.15  | 0.92    | 0.99 |
| Catenibacterium               | 1.09   | 0.16    | 0.37 | 1.00   | 0.16    | 0.51 | 0.59   | 0.42    | 0.88 | 0.64   | 0.38    | 0.78 | 0.46   | 0.53    | 0.89 |
| Christensenellaceae_R.7_group | 1.84   | 0.01    | 0.10 | 1.31   | 0.05    | 0.33 | 0.86   | 0.21    | 0.85 | 0.94   | 0.17    | 0.77 | 0.97   | 0.15    | 0.75 |
| Clostridium_sensu_stricto_1   | 0.60   | 0.47    | 0.66 | 1.00   | 0.20    | 0.51 | 0.56   | 0.49    | 0.91 | 0.60   | 0.46    | 0.84 | 0.32   | 0.70    | 0.94 |
| Colidextribacter              | -1.64  | 0.33    | 0.55 | -2.92  | 0.06    | 0.35 | -1.81  | 0.25    | 0.85 | -1.87  | 0.24    | 0.77 | -2.18  | 0.17    | 0.75 |
| Collinsella                   | -0.58  | 0.48    | 0.66 | -0.24  | 0.75    | 0.88 | -0.70  | 0.38    | 0.88 | -0.63  | 0.42    | 0.81 | -0.63  | 0.42    | 0.81 |
| Coprobacter                   | 0.61   | 0.46    | 0.66 | 0.28   | 0.71    | 0.88 | -0.31  | 0.69    | 0.92 | -0.20  | 0.79    | 0.96 | -0.01  | 0.99    | 0.99 |
| Coprococcus                   | 2.68   | 0.01    | 0.10 | 1.69   | 0.07    | 0.38 | 1.34   | 0.16    | 0.85 | 1.55   | 0.10    | 0.70 | 1.58   | 0.10    | 0.75 |
| Defluviitaleaceae_UCG.011     | 2.45   | 0.08    | 0.27 | 2.45   | 0.05    | 0.33 | 2.75   | 0.04    | 0.71 | 2.81   | 0.03    | 0.61 | 2.88   | 0.03    | 0.51 |
| Desulfovibrio                 | 0.89   | 0.23    | 0.46 | 0.88   | 0.20    | 0.51 | 0.93   | 0.20    | 0.85 | 1.29   | 0.07    | 0.67 | 1.44   | 0.05    | 0.51 |
| Dialister                     | -0.04  | 0.95    | 0.97 | -0.01  | 0.99    | 0.99 | 0.29   | 0.62    | 0.91 | 0.19   | 0.74    | 0.96 | -0.03  | 0.96    | 0.99 |
| Dorea                         | 1.82   | 0.15    | 0.37 | 1.13   | 0.34    | 0.57 | 1.08   | 0.36    | 0.88 | 1.23   | 0.30    | 0.77 | 1.34   | 0.25    | 0.75 |
| DTU089                        | 1.43   | 0.25    | 0.48 | 1.36   | 0.24    | 0.51 | 0.67   | 0.57    | 0.91 | 1.06   | 0.36    | 0.78 | 1.13   | 0.33    | 0.79 |
| Eggerthella                   | -0.86  | 0.47    | 0.66 | -1.27  | 0.25    | 0.51 | -0.37  | 0.75    | 0.94 | -0.25  | 0.83    | 0.97 | -0.22  | 0.84    | 0.99 |
| Eisenbergiella                | -1.94  | 0.15    | 0.37 | -1.80  | 0.15    | 0.51 | -0.67  | 0.60    | 0.91 | -0.39  | 0.76    | 0.96 | -0.46  | 0.72    | 0.94 |
| Enterorhabdus                 | 1.96   | 0.08    | 0.27 | 1.38   | 0.19    | 0.51 | 1.03   | 0.35    | 0.88 | 1.11   | 0.31    | 0.77 | 1.03   | 0.35    | 0.81 |
| Erysipelatoclostridium        | -0.92  | 0.48    | 0.66 | -0.51  | 0.67    | 0.86 | 0.58   | 0.64    | 0.91 | 0.85   | 0.49    | 0.84 | 0.72   | 0.55    | 0.90 |
| Erysipelotrichaceae_UCG.003   | 0.38   | 0.68    | 0.81 | 0.14   | 0.87    | 0.94 | -0.20  | 0.82    | 0.96 | -0.23  | 0.79    | 0.96 | -0.25  | 0.77    | 0.94 |
| Escherichia_Shigella          | -0.89  | 0.32    | 0.55 | -0.09  | 0.91    | 0.94 | 0.28   | 0.75    | 0.94 | 0.15   | 0.86    | 0.98 | 0.28   | 0.75    | 0.94 |
| Faecalibacterium              | 2.59   | 0.07    | 0.26 | 2.77   | 0.03    | 0.33 | 2.79   | 0.04    | 0.71 | 2.87   | 0.04    | 0.61 | 2.72   | 0.05    | 0.51 |
| Family_XIII_AD3011_group      | 3.44   | 0.00    | 0.07 | 2.01   | 0.07    | 0.37 | 1.75   | 0.12    | 0.85 | 2.19   | 0.05    | 0.67 | 2.30   | 0.04    | 0.51 |
| Family_XIII_UCG.001           | 2.46   | 0.07    | 0.26 | 1.79   | 0.15    | 0.51 | 1.32   | 0.31    | 0.85 | 1.79   | 0.17    | 0.77 | 1.89   | 0.15    | 0.75 |
| FD2005                        | 0.95   | 0.43    | 0.66 | 1.19   | 0.28    | 0.54 | 0.92   | 0.42    | 0.88 | 0.58   | 0.61    | 0.92 | 0.54   | 0.64    | 0.91 |
| Flavonifractor                | -0.91  | 0.41    | 0.65 | -0.69  | 0.50    | 0.72 | 0.64   | 0.55    | 0.91 | 0.57   | 0.59    | 0.90 | 0.42   | 0.69    | 0.94 |
| Fournierella                  | 1.40   | 0.22    | 0.46 | 1.24   | 0.24    | 0.51 | 0.12   | 0.91    | 0.98 | 0.32   | 0.77    | 0.96 | 0.36   | 0.74    | 0.94 |
| Frisingicoccus                | -1.90  | 0.07    | 0.26 | -1.50  | 0.12    | 0.48 | -1.15  | 0.24    | 0.85 | -1.27  | 0.19    | 0.77 | -1.08  | 0.27    | 0.75 |
| Fusicatenibacter              | 0.28   | 0.79    | 0.86 | -0.01  | 0.99    | 0.99 | -0.56  | 0.58    | 0.91 | -0.69  | 0.48    | 0.84 | -0.68  | 0.49    | 0.84 |
| Fusobacterium                 | -2.32  | 0.08    | 0.27 | -1.48  | 0.24    | 0.51 | -0.96  | 0.45    | 0.89 | -0.69  | 0.58    | 0.90 | -0.37  | 0.77    | 0.94 |
| GCA.900066575                 | 1.80   | 0.15    | 0.37 | 1.09   | 0.34    | 0.57 | 0.34   | 0.77    | 0.94 | 0.49   | 0.67    | 0.95 | 0.43   | 0.71    | 0.94 |
| Gordonibacter                 | -1.25  | 0.36    | 0.60 | -1.74  | 0.17    | 0.51 | -0.72  | 0.57    | 0.91 | -0.46  | 0.72    | 0.96 | -0.29  | 0.82    | 0.98 |
| Granulicatella                | -2.76  | 0.12    | 0.35 | -1.87  | 0.26    | 0.53 | -0.96  | 0.58    | 0.91 | -0.83  | 0.63    | 0.92 | -1.00  | 0.57    | 0.90 |
| Haemophilus                   | 1.44   | 0.10    | 0.30 | 1.41   | 0.08    | 0.39 | 1.29   | 0.13    | 0.85 | 1.36   | 0.11    | 0.70 | 1.21   | 0.16    | 0.75 |
| Harrylintia                   | 1.22   | 0.40    | 0.65 | 0.46   | 0.74    | 0.88 | 0.33   | 0.82    | 0.96 | 0.41   | 0.77    | 0.96 | 0.76   | 0.59    | 0.90 |
| Holdemania                    | 1.03   | 0.23    | 0.46 | 0.98   | 0.21    | 0.51 | 0.71   | 0.39    | 0.88 | 0.71   | 0.38    | 0.78 | 0.84   | 0.30    | 0.76 |

|                               |       |      |      |       |      |      |       |      |      |       |      |      |       |      |      |
|-------------------------------|-------|------|------|-------|------|------|-------|------|------|-------|------|------|-------|------|------|
| Holdemania                    | -0.21 | 0.93 | 0.95 | 0.26  | 0.90 | 0.94 | 1.51  | 0.50 | 0.91 | 2.14  | 0.34 | 0.77 | 2.50  | 0.26 | 0.75 |
| Howardella                    | 0.11  | 0.92 | 0.95 | -0.16 | 0.87 | 0.94 | -0.66 | 0.51 | 0.91 | -0.44 | 0.66 | 0.94 | -0.51 | 0.60 | 0.91 |
| Hungatella                    | -2.74 | 0.03 | 0.16 | -2.44 | 0.03 | 0.33 | -1.47 | 0.21 | 0.85 | -1.25 | 0.29 | 0.77 | -1.48 | 0.21 | 0.75 |
| Hydrogenoanaerobacterium      | 4.14  | 0.00 | 0.09 | 2.86  | 0.04 | 0.33 | 2.36  | 0.10 | 0.85 | 2.55  | 0.07 | 0.67 | 2.44  | 0.08 | 0.70 |
| Incertae_Sedis                | 4.31  | 0.04 | 0.16 | 4.57  | 0.02 | 0.33 | 4.78  | 0.02 | 0.71 | 4.73  | 0.02 | 0.61 | 4.94  | 0.01 | 0.51 |
| Intestinibacter               | 0.28  | 0.80 | 0.86 | 0.82  | 0.42 | 0.66 | 0.46  | 0.66 | 0.91 | 0.15  | 0.89 | 0.99 | -0.13 | 0.90 | 0.99 |
| Intestinimonas                | 2.74  | 0.01 | 0.10 | 1.36  | 0.19 | 0.51 | 0.90  | 0.40 | 0.88 | 0.88  | 0.41 | 0.81 | 1.12  | 0.29 | 0.76 |
| Lachnoclostridium             | -4.86 | 0.03 | 0.16 | -4.20 | 0.05 | 0.33 | -1.76 | 0.42 | 0.88 | -2.14 | 0.32 | 0.77 | -2.11 | 0.33 | 0.79 |
| Lachnospira                   | 3.66  | 0.00 | 0.07 | 2.44  | 0.03 | 0.33 | 1.52  | 0.18 | 0.85 | 1.33  | 0.24 | 0.77 | 1.30  | 0.25 | 0.75 |
| Lachnospiraceae_FCS020_group  | 3.49  | 0.00 | 0.07 | 2.67  | 0.01 | 0.33 | 2.26  | 0.04 | 0.71 | 2.33  | 0.03 | 0.61 | 2.30  | 0.03 | 0.51 |
| Lachnospiraceae_ND3007_group  | 1.03  | 0.19 | 0.41 | 0.40  | 0.58 | 0.80 | 0.05  | 0.94 | 0.98 | 0.03  | 0.96 | 1.00 | 0.04  | 0.95 | 0.99 |
| Lachnospiraceae_NK4A136_group | 2.61  | 0.02 | 0.11 | 1.60  | 0.12 | 0.48 | 0.66  | 0.53 | 0.91 | 0.76  | 0.47 | 0.84 | 0.84  | 0.42 | 0.81 |
| Lachnospiraceae_UCG.001       | 2.04  | 0.01 | 0.10 | 1.65  | 0.02 | 0.33 | 1.56  | 0.05 | 0.71 | 1.58  | 0.04 | 0.61 | 1.53  | 0.05 | 0.51 |
| Lachnospiraceae_UCG.004       | 2.65  | 0.01 | 0.10 | 1.88  | 0.04 | 0.33 | 1.60  | 0.09 | 0.85 | 1.57  | 0.09 | 0.67 | 1.41  | 0.13 | 0.75 |
| Lachnospiraceae_UCG.010       | 0.24  | 0.86 | 0.91 | -0.58 | 0.63 | 0.83 | -0.54 | 0.66 | 0.91 | -0.25 | 0.84 | 0.97 | 0.12  | 0.92 | 0.99 |
| Lactobacillus                 | -1.18 | 0.32 | 0.55 | -0.24 | 0.83 | 0.92 | -0.62 | 0.59 | 0.91 | -0.60 | 0.60 | 0.90 | -1.01 | 0.38 | 0.81 |
| Lactococcus                   | -0.17 | 0.91 | 0.95 | -0.93 | 0.48 | 0.72 | -0.36 | 0.79 | 0.94 | -0.10 | 0.94 | 1.00 | 0.01  | 0.99 | 0.99 |
| Marvinbryantia                | 1.01  | 0.25 | 0.48 | 0.37  | 0.65 | 0.85 | 0.02  | 0.98 | 0.98 | 0.12  | 0.88 | 0.99 | 0.14  | 0.87 | 0.99 |
| Megasphaera                   | -0.22 | 0.75 | 0.86 | 0.38  | 0.55 | 0.76 | 0.44  | 0.52 | 0.91 | 0.43  | 0.53 | 0.87 | 0.32  | 0.64 | 0.91 |
| Monoglobus                    | 1.20  | 0.27 | 0.51 | 0.71  | 0.48 | 0.72 | 0.12  | 0.91 | 0.98 | 0.23  | 0.83 | 0.97 | 0.59  | 0.59 | 0.90 |
| Moryella                      | 3.34  | 0.02 | 0.12 | 2.60  | 0.05 | 0.33 | 1.43  | 0.31 | 0.85 | 1.72  | 0.22 | 0.77 | 1.60  | 0.25 | 0.75 |
| Negativibacillus              | -0.15 | 0.88 | 0.93 | -0.68 | 0.46 | 0.72 | -0.98 | 0.30 | 0.85 | -1.03 | 0.28 | 0.77 | -0.92 | 0.33 | 0.79 |
| NK4A214_group                 | 1.29  | 0.09 | 0.29 | 0.59  | 0.41 | 0.66 | -0.02 | 0.98 | 0.98 | 0.08  | 0.92 | 1.00 | 0.05  | 0.95 | 0.99 |
| Odoribacter                   | 0.55  | 0.46 | 0.66 | 0.46  | 0.51 | 0.72 | 0.09  | 0.90 | 0.98 | 0.04  | 0.95 | 1.00 | 0.23  | 0.75 | 0.94 |
| Oscillibacter                 | 1.69  | 0.19 | 0.41 | 1.24  | 0.30 | 0.54 | 1.38  | 0.27 | 0.85 | 1.61  | 0.20 | 0.77 | 1.51  | 0.22 | 0.75 |
| Oscillospira                  | 0.77  | 0.67 | 0.81 | 0.53  | 0.75 | 0.88 | 1.87  | 0.27 | 0.85 | 2.12  | 0.20 | 0.77 | 2.27  | 0.17 | 0.75 |
| Oxalobacter                   | 3.70  | 0.00 | 0.07 | 2.57  | 0.03 | 0.33 | 2.28  | 0.05 | 0.74 | 2.36  | 0.05 | 0.61 | 2.90  | 0.02 | 0.51 |
| Paludicola                    | 3.10  | 0.01 | 0.10 | 1.42  | 0.24 | 0.51 | 1.00  | 0.43 | 0.88 | 1.59  | 0.21 | 0.77 | 1.60  | 0.21 | 0.75 |
| Parabacteroides               | 0.44  | 0.63 | 0.79 | 1.00  | 0.23 | 0.51 | 1.16  | 0.17 | 0.85 | 1.42  | 0.09 | 0.67 | 1.57  | 0.06 | 0.59 |
| Paraprevotella                | 0.75  | 0.23 | 0.46 | 0.93  | 0.11 | 0.47 | 0.88  | 0.15 | 0.85 | 1.05  | 0.08 | 0.67 | 0.99  | 0.11 | 0.75 |
| Parasutterella                | 0.86  | 0.21 | 0.45 | 0.86  | 0.18 | 0.51 | 0.40  | 0.55 | 0.91 | 0.32  | 0.63 | 0.92 | 0.51  | 0.45 | 0.82 |
| Peptococcus                   | 2.52  | 0.04 | 0.16 | 1.62  | 0.15 | 0.51 | 1.39  | 0.22 | 0.85 | 1.69  | 0.14 | 0.77 | 1.69  | 0.14 | 0.75 |
| Phascolarctobacterium         | 0.19  | 0.76 | 0.86 | 0.20  | 0.73 | 0.88 | 0.18  | 0.77 | 0.94 | 0.34  | 0.58 | 0.90 | 0.53  | 0.38 | 0.81 |
| Phocaea                       | 1.13  | 0.49 | 0.66 | 0.34  | 0.82 | 0.92 | 0.03  | 0.98 | 0.98 | 0.00  | 1.00 | 1.00 | 0.14  | 0.93 | 0.99 |
| Prevotella                    | -0.25 | 0.64 | 0.80 | -0.08 | 0.88 | 0.94 | -0.34 | 0.50 | 0.91 | -0.34 | 0.49 | 0.84 | -0.37 | 0.46 | 0.82 |
| Romboutsia                    | 0.62  | 0.54 | 0.70 | 0.98  | 0.29 | 0.54 | 0.92  | 0.34 | 0.88 | 0.89  | 0.35 | 0.77 | 0.61  | 0.52 | 0.89 |
| Roseburia                     | 3.30  | 0.01 | 0.10 | 2.32  | 0.05 | 0.33 | 1.31  | 0.31 | 0.85 | 1.22  | 0.34 | 0.77 | 1.12  | 0.37 | 0.81 |
| Ruminococcus                  | 1.04  | 0.19 | 0.41 | 0.64  | 0.38 | 0.63 | 0.02  | 0.98 | 0.98 | 0.05  | 0.94 | 1.00 | -0.04 | 0.96 | 0.99 |
| Sellimonas                    | 0.82  | 0.45 | 0.66 | 1.01  | 0.31 | 0.54 | 0.73  | 0.46 | 0.90 | 0.85  | 0.39 | 0.79 | 0.88  | 0.38 | 0.81 |
| Senegalimassilia              | 1.39  | 0.16 | 0.37 | 1.27  | 0.16 | 0.51 | 0.35  | 0.71 | 0.93 | 0.53  | 0.57 | 0.90 | 0.53  | 0.57 | 0.90 |
| Shuttleworthia                | 1.84  | 0.16 | 0.37 | 1.24  | 0.30 | 0.54 | 1.32  | 0.29 | 0.85 | 1.20  | 0.33 | 0.77 | 1.28  | 0.30 | 0.76 |
| Slackia                       | 0.30  | 0.73 | 0.85 | 0.54  | 0.50 | 0.72 | 0.17  | 0.84 | 0.96 | 0.34  | 0.68 | 0.95 | 0.40  | 0.63 | 0.91 |
| Streptococcus                 | 0.37  | 0.78 | 0.86 | 0.47  | 0.71 | 0.88 | 0.62  | 0.64 | 0.91 | 1.21  | 0.37 | 0.78 | 0.82  | 0.55 | 0.90 |
| Subdoligranulum               | 1.03  | 0.33 | 0.55 | 0.52  | 0.59 | 0.80 | 0.21  | 0.83 | 0.96 | 0.36  | 0.72 | 0.96 | 0.36  | 0.72 | 0.94 |
| Sutterella                    | -1.03 | 0.08 | 0.27 | -0.71 | 0.19 | 0.51 | -0.86 | 0.13 | 0.85 | -0.77 | 0.17 | 0.77 | -0.81 | 0.15 | 0.75 |
| TM7x                          | -1.07 | 0.44 | 0.66 | -1.63 | 0.21 | 0.51 | -1.09 | 0.41 | 0.88 | -0.91 | 0.49 | 0.84 | -0.96 | 0.46 | 0.82 |
| Turicibacter                  | -0.53 | 0.69 | 0.81 | 0.51  | 0.68 | 0.86 | -0.04 | 0.98 | 0.98 | -0.30 | 0.80 | 0.96 | -0.55 | 0.65 | 0.93 |
| Tuzzerella                    | -1.67 | 0.09 | 0.29 | -1.57 | 0.08 | 0.40 | -1.24 | 0.20 | 0.85 | -1.31 | 0.17 | 0.77 | -1.28 | 0.18 | 0.75 |
| UBA1819                       | -1.19 | 0.43 | 0.66 | -1.60 | 0.25 | 0.51 | -0.61 | 0.67 | 0.91 | -0.27 | 0.85 | 0.97 | -0.19 | 0.89 | 0.99 |
| UCG.002                       | 0.80  | 0.30 | 0.55 | 0.08  | 0.91 | 0.94 | -0.38 | 0.61 | 0.91 | -0.25 | 0.74 | 0.96 | -0.09 | 0.90 | 0.99 |
| UCG.003                       | 1.28  | 0.11 | 0.32 | 0.60  | 0.42 | 0.66 | 0.16  | 0.84 | 0.96 | 0.27  | 0.72 | 0.96 | 0.30  | 0.70 | 0.94 |
| UCG.005                       | 1.84  | 0.04 | 0.17 | 1.33  | 0.11 | 0.47 | 0.38  | 0.67 | 0.91 | 0.70  | 0.43 | 0.81 | 0.69  | 0.44 | 0.82 |
| UCG.009                       | 3.12  | 0.02 | 0.11 | 2.39  | 0.05 | 0.33 | 1.54  | 0.22 | 0.85 | 1.69  | 0.17 | 0.77 | 1.62  | 0.19 | 0.75 |
| Veillonella                   | 0.88  | 0.33 | 0.55 | 1.15  | 0.17 | 0.51 | 0.81  | 0.35 | 0.88 | 0.83  | 0.34 | 0.77 | 0.65  | 0.45 | 0.82 |
| Victivallis                   | 2.61  | 0.00 | 0.07 | 2.24  | 0.01 | 0.31 | 1.47  | 0.08 | 0.85 | 1.46  | 0.08 | 0.67 | 1.43  | 0.08 | 0.70 |

Multivariable-adjusted regression models adjusted for:

Model 1: sequencing batch, age, race, gender, study center

Model 2: Model 1, with education

Model 3: Model 2, with physical activity, diet score, medication use, and smoking

Model 4: Model 3 with BMI

Model 5: Model 4 with hypertension and diabetes

eTable 48: Multivariable-adjusted regression coefficients, p-values, and false discovery rate (FDR)-adjusted p-values for genera among male participants with respect to Stroop.

|                               | Model1 |         |      | Model2 |         |      | Model3 |         |      | Model4 |         |      | Model5 |         |      |
|-------------------------------|--------|---------|------|--------|---------|------|--------|---------|------|--------|---------|------|--------|---------|------|
|                               | beta   | p-value | FDR  | beta   | p-value | FDR  | beta   | p-value | FDR  | beta   | p-value | FDR  | beta   | p-value | FDR  |
| Acetanaerobacterium           | 0.15   | 0.93    | 0.97 | 0.24   | 0.89    | 0.98 | 1.15   | 0.48    | 0.85 | 1.15   | 0.48    | 0.84 | 1.03   | 0.53    | 0.89 |
| Acidaminococcus               | 0.34   | 0.49    | 0.76 | 0.14   | 0.77    | 0.97 | -0.47  | 0.35    | 0.85 | -0.45  | 0.36    | 0.84 | -0.39  | 0.44    | 0.89 |
| Actinomyces                   | 0.01   | 0.99    | 0.99 | -0.06  | 0.96    | 0.98 | -1.30  | 0.35    | 0.85 | -1.40  | 0.32    | 0.82 | -1.06  | 0.45    | 0.89 |
| Adlercreutzia                 | 1.93   | 0.02    | 0.31 | 1.85   | 0.02    | 0.43 | 1.86   | 0.02    | 0.35 | 1.87   | 0.02    | 0.34 | 1.81   | 0.02    | 0.43 |
| Agathobacter                  | -1.51  | 0.19    | 0.61 | -1.21  | 0.29    | 0.70 | -0.26  | 0.81    | 0.96 | -0.21  | 0.85    | 0.98 | -0.12  | 0.91    | 0.99 |
| Akkermansia                   | 0.56   | 0.33    | 0.68 | 0.85   | 0.14    | 0.58 | 1.09   | 0.05    | 0.52 | 1.10   | 0.05    | 0.51 | 1.04   | 0.07    | 0.61 |
| Alistipes                     | 0.36   | 0.71    | 0.94 | 0.77   | 0.43    | 0.80 | 1.09   | 0.25    | 0.85 | 1.10   | 0.25    | 0.82 | 0.83   | 0.39    | 0.89 |
| Allisonella                   | -0.22  | 0.81    | 0.97 | -0.69  | 0.46    | 0.80 | -0.25  | 0.79    | 0.96 | -0.24  | 0.79    | 0.94 | -0.24  | 0.80    | 0.99 |
| Anaerofilum                   | 2.32   | 0.06    | 0.53 | 2.72   | 0.03    | 0.44 | 3.04   | 0.01    | 0.30 | 3.05   | 0.01    | 0.32 | 2.96   | 0.01    | 0.37 |
| Anaerostipes                  | -0.37  | 0.80    | 0.97 | 0.11   | 0.94    | 0.98 | 0.63   | 0.65    | 0.93 | 0.66   | 0.64    | 0.92 | 0.80   | 0.57    | 0.89 |
| Anaerotruncus                 | 1.33   | 0.24    | 0.68 | 1.64   | 0.14    | 0.58 | 2.40   | 0.02    | 0.35 | 2.38   | 0.03    | 0.37 | 2.27   | 0.04    | 0.56 |
| Bacteroides                   | 1.65   | 0.35    | 0.68 | 1.66   | 0.34    | 0.72 | 1.62   | 0.32    | 0.85 | 1.68   | 0.31    | 0.82 | 1.57   | 0.34    | 0.89 |
| Barnesiella                   | -0.35  | 0.51    | 0.76 | -0.38  | 0.46    | 0.80 | -0.39  | 0.44    | 0.85 | -0.39  | 0.43    | 0.84 | -0.34  | 0.50    | 0.89 |
| Bifidobacterium               | -0.71  | 0.29    | 0.68 | -0.94  | 0.16    | 0.58 | -0.60  | 0.34    | 0.85 | -0.59  | 0.35    | 0.84 | -0.56  | 0.38    | 0.89 |
| Bilophila                     | -0.14  | 0.86    | 0.97 | 0.18   | 0.81    | 0.98 | 0.50   | 0.50    | 0.85 | 0.55   | 0.46    | 0.84 | 0.50   | 0.50    | 0.89 |
| Blautia                       | 0.08   | 0.97    | 0.99 | 0.98   | 0.69    | 0.93 | 1.29   | 0.58    | 0.89 | 1.28   | 0.58    | 0.90 | 1.27   | 0.59    | 0.89 |
| Butyricoccus                  | -0.57  | 0.76    | 0.94 | 0.39   | 0.84    | 0.98 | 1.41   | 0.44    | 0.85 | 1.40   | 0.44    | 0.84 | 1.40   | 0.44    | 0.89 |
| Butyricimonas                 | 0.12   | 0.85    | 0.97 | 0.26   | 0.67    | 0.93 | 0.22   | 0.71    | 0.96 | 0.22   | 0.71    | 0.94 | 0.13   | 0.83    | 0.99 |
| CAG.56                        | -0.35  | 0.60    | 0.86 | -0.15  | 0.82    | 0.98 | 0.42   | 0.51    | 0.85 | 0.41   | 0.52    | 0.84 | 0.33   | 0.61    | 0.89 |
| Candidatus_Soleaferrea        | 1.26   | 0.34    | 0.68 | 1.74   | 0.18    | 0.58 | 1.62   | 0.20    | 0.85 | 1.61   | 0.20    | 0.82 | 1.52   | 0.23    | 0.89 |
| Caproiciproducens             | -0.13  | 0.92    | 0.97 | 0.00   | 1.00    | 1.00 | 0.30   | 0.80    | 0.96 | 0.30   | 0.80    | 0.94 | 0.37   | 0.76    | 0.97 |
| Catenibacterium               | -1.13  | 0.08    | 0.58 | -1.08  | 0.09    | 0.58 | -0.48  | 0.44    | 0.85 | -0.49  | 0.43    | 0.84 | -0.39  | 0.53    | 0.89 |
| Christensenellaceae_R.7_group | -1.28  | 0.03    | 0.33 | -1.07  | 0.07    | 0.58 | -0.64  | 0.27    | 0.85 | -0.65  | 0.26    | 0.82 | -0.72  | 0.22    | 0.89 |
| Clostridium_sensu_stricto_1   | 0.02   | 0.98    | 0.99 | -0.15  | 0.83    | 0.98 | 0.00   | 1.00    | 1.00 | 0.00   | 1.00    | 1.00 | 0.24   | 0.74    | 0.97 |
| Collidextribacter             | 0.89   | 0.53    | 0.78 | 1.39   | 0.32    | 0.72 | 0.63   | 0.64    | 0.93 | 0.64   | 0.63    | 0.92 | 0.81   | 0.55    | 0.89 |
| Collinsella                   | -0.81  | 0.24    | 0.68 | -0.95  | 0.16    | 0.58 | -0.68  | 0.31    | 0.85 | -0.69  | 0.30    | 0.82 | -0.74  | 0.27    | 0.89 |
| Coprobacter                   | -0.22  | 0.75    | 0.94 | -0.09  | 0.90    | 0.98 | 0.28   | 0.67    | 0.93 | 0.26   | 0.68    | 0.94 | 0.13   | 0.85    | 0.99 |
| Coprococcus                   | -0.92  | 0.28    | 0.68 | -0.51  | 0.55    | 0.86 | -0.53  | 0.52    | 0.85 | -0.56  | 0.50    | 0.84 | -0.63  | 0.45    | 0.89 |
| Defluviitaleaceae_UCG.011     | -1.75  | 0.13    | 0.61 | -1.77  | 0.12    | 0.58 | -1.10  | 0.32    | 0.85 | -1.10  | 0.32    | 0.82 | -1.20  | 0.28    | 0.89 |
| Desulfovibrio                 | -0.59  | 0.34    | 0.68 | -0.59  | 0.33    | 0.72 | -0.48  | 0.42    | 0.85 | -0.54  | 0.38    | 0.84 | -0.66  | 0.29    | 0.89 |
| Dialister                     | -0.10  | 0.83    | 0.97 | -0.12  | 0.80    | 0.98 | -0.15  | 0.76    | 0.96 | -0.14  | 0.78    | 0.94 | 0.00   | 0.99    | 0.99 |
| Dorea                         | -1.55  | 0.14    | 0.61 | -1.27  | 0.22    | 0.60 | -1.28  | 0.19    | 0.85 | -1.30  | 0.19    | 0.82 | -1.38  | 0.16    | 0.84 |
| DTU089                        | 0.53   | 0.61    | 0.86 | 0.55   | 0.59    | 0.90 | 0.90   | 0.36    | 0.85 | 0.87   | 0.39    | 0.84 | 0.78   | 0.44    | 0.89 |
| Eggerthella                   | 1.40   | 0.16    | 0.61 | 1.57   | 0.11    | 0.58 | 1.13   | 0.24    | 0.85 | 1.12   | 0.25    | 0.82 | 1.09   | 0.26    | 0.89 |
| Eisenbergiella                | 0.75   | 0.51    | 0.76 | 0.70   | 0.53    | 0.86 | 0.32   | 0.77    | 0.96 | 0.28   | 0.80    | 0.94 | 0.39   | 0.72    | 0.96 |
| Enterorhabdus                 | -2.23  | 0.02    | 0.31 | -1.99  | 0.03    | 0.44 | -1.79  | 0.05    | 0.52 | -1.80  | 0.05    | 0.51 | -1.81  | 0.05    | 0.61 |
| Erysipelatoclostridium        | 1.94   | 0.07    | 0.58 | 1.78   | 0.10    | 0.58 | 1.66   | 0.11    | 0.67 | 1.64   | 0.11    | 0.69 | 1.79   | 0.08    | 0.61 |
| Erysipelotrichaceae_UCG.003   | 0.03   | 0.97    | 0.99 | 0.12   | 0.87    | 0.98 | 0.18   | 0.81    | 0.96 | 0.18   | 0.81    | 0.94 | 0.15   | 0.84    | 0.99 |
| Escherichia_Shigella          | 0.36   | 0.63    | 0.86 | 0.04   | 0.96    | 0.98 | 0.03   | 0.97    | 1.00 | 0.05   | 0.95    | 1.00 | -0.03  | 0.96    | 0.99 |
| Faecalibacterium              | -3.35  | 0.00    | 0.22 | -3.42  | 0.00    | 0.28 | -3.60  | 0.00    | 0.18 | -3.61  | 0.00    | 0.18 | -3.61  | 0.00    | 0.19 |
| Family_XIII_AD3011_group      | -0.77  | 0.42    | 0.71 | -0.18  | 0.86    | 0.98 | 0.68   | 0.48    | 0.85 | 0.64   | 0.51    | 0.84 | 0.51   | 0.60    | 0.89 |
| Family_XIII_UCG.001           | -0.25  | 0.83    | 0.97 | 0.06   | 0.96    | 0.98 | 0.05   | 0.97    | 1.00 | -0.01  | 0.99    | 1.00 | -0.12  | 0.91    | 0.99 |
| FD2005                        | -1.34  | 0.18    | 0.61 | -1.42  | 0.15    | 0.58 | -0.51  | 0.59    | 0.90 | -0.48  | 0.63    | 0.92 | -0.50  | 0.61    | 0.89 |
| Flavonifractor                | 0.93   | 0.32    | 0.68 | 0.82   | 0.37    | 0.73 | -0.10  | 0.91    | 1.00 | -0.09  | 0.92    | 1.00 | 0.02   | 0.98    | 0.99 |
| Fournierella                  | -1.00  | 0.29    | 0.68 | -0.93  | 0.32    | 0.72 | -0.23  | 0.80    | 0.96 | -0.26  | 0.78    | 0.94 | -0.34  | 0.71    | 0.96 |
| Frisingicoccus                | 2.04   | 0.02    | 0.31 | 1.86   | 0.03    | 0.44 | 2.22   | 0.01    | 0.30 | 2.24   | 0.01    | 0.32 | 2.13   | 0.01    | 0.37 |
| Fusicatenibacter              | -0.83  | 0.37    | 0.69 | -0.69  | 0.45    | 0.80 | -0.25  | 0.77    | 0.96 | -0.24  | 0.79    | 0.94 | -0.22  | 0.80    | 0.99 |
| Fusobacterium                 | 0.99   | 0.37    | 0.69 | 0.66   | 0.55    | 0.86 | 0.75   | 0.48    | 0.85 | 0.72   | 0.50    | 0.84 | 0.56   | 0.60    | 0.89 |
| GCA.900066575                 | -1.42  | 0.17    | 0.61 | -1.15  | 0.26    | 0.65 | -0.72  | 0.46    | 0.85 | -0.74  | 0.45    | 0.84 | -0.80  | 0.42    | 0.89 |
| Gordonibacter                 | 1.87   | 0.10    | 0.61 | 2.08   | 0.06    | 0.58 | 2.07   | 0.05    | 0.52 | 2.05   | 0.06    | 0.51 | 1.91   | 0.08    | 0.61 |
| Granulicatella                | 0.14   | 0.92    | 0.97 | -0.22  | 0.88    | 0.98 | -1.66  | 0.26    | 0.85 | -1.68  | 0.25    | 0.82 | -1.51  | 0.30    | 0.89 |
| Haemophilus                   | -0.97  | 0.18    | 0.61 | -0.96  | 0.18    | 0.58 | -0.93  | 0.20    | 0.85 | -0.94  | 0.20    | 0.82 | -0.90  | 0.22    | 0.89 |
| Harriflintia                  | 1.29   | 0.29    | 0.68 | 1.60   | 0.19    | 0.58 | 2.65   | 0.03    | 0.35 | 2.65   | 0.03    | 0.37 | 2.43   | 0.04    | 0.58 |
| Holdemania                    | -0.67  | 0.35    | 0.68 | -0.63  | 0.37    | 0.73 | -0.02  | 0.98    | 1.00 | -0.02  | 0.98    | 1.00 | -0.11  | 0.87    | 0.99 |

|                              |       |      |      |       |      |      |       |      |      |       |      |      |       |      |      |
|------------------------------|-------|------|------|-------|------|------|-------|------|------|-------|------|------|-------|------|------|
| Holdemania                   | 2.93  | 0.14 | 0.61 | 2.75  | 0.16 | 0.58 | 2.37  | 0.21 | 0.85 | 2.33  | 0.22 | 0.82 | 2.05  | 0.28 | 0.89 |
| Howardella                   | -1.19 | 0.17 | 0.61 | -1.07 | 0.21 | 0.59 | -0.07 | 0.94 | 1.00 | -0.10 | 0.91 | 1.00 | -0.06 | 0.95 | 0.99 |
| Hungatella                   | 2.99  | 0.00 | 0.22 | 2.87  | 0.01 | 0.28 | 2.52  | 0.01 | 0.30 | 2.51  | 0.01 | 0.32 | 2.71  | 0.01 | 0.37 |
| Hydrogenoanaerobacterium     | -1.58 | 0.20 | 0.62 | -1.05 | 0.39 | 0.76 | -0.70 | 0.56 | 0.87 | -0.72 | 0.55 | 0.85 | -0.72 | 0.55 | 0.89 |
| Incertae_Sedis               | 0.21  | 0.91 | 0.97 | 0.10  | 0.96 | 0.98 | 0.01  | 1.00 | 1.00 | 0.01  | 0.99 | 1.00 | -0.10 | 0.95 | 0.99 |
| Intestinibacter              | -0.94 | 0.31 | 0.68 | -1.16 | 0.20 | 0.58 | -0.95 | 0.29 | 0.85 | -0.92 | 0.30 | 0.82 | -0.84 | 0.36 | 0.89 |
| Intestinimonas               | 0.79  | 0.39 | 0.69 | 1.45  | 0.12 | 0.58 | 1.53  | 0.09 | 0.67 | 1.54  | 0.09 | 0.68 | 1.35  | 0.14 | 0.83 |
| Lachnoclostridium            | 3.58  | 0.06 | 0.53 | 3.29  | 0.08 | 0.58 | 2.01  | 0.27 | 0.85 | 2.07  | 0.26 | 0.82 | 2.19  | 0.23 | 0.89 |
| Lachnospira                  | -2.44 | 0.01 | 0.31 | -1.99 | 0.04 | 0.48 | -1.54 | 0.11 | 0.67 | -1.52 | 0.11 | 0.69 | -1.56 | 0.11 | 0.70 |
| Lachnospiraceae_FCS020_group | -1.56 | 0.10 | 0.61 | -1.22 | 0.19 | 0.58 | -0.36 | 0.70 | 0.95 | -0.37 | 0.69 | 0.94 | -0.37 | 0.69 | 0.95 |
| Lachnospiraceae_ND3007_group | -0.85 | 0.19 | 0.61 | -0.61 | 0.35 | 0.73 | -0.22 | 0.72 | 0.96 | -0.22 | 0.72 | 0.94 | -0.26 | 0.68 | 0.95 |
| Lachnospiraceae_NK4A136_grou | -0.79 | 0.39 | 0.69 | -0.38 | 0.68 | 0.93 | 0.76  | 0.39 | 0.85 | 0.75  | 0.40 | 0.84 | 0.64  | 0.48 | 0.89 |
| Lachnospiraceae_UCG.001      | -1.01 | 0.13 | 0.61 | -0.86 | 0.19 | 0.58 | -0.28 | 0.67 | 0.93 | -0.29 | 0.66 | 0.94 | -0.26 | 0.69 | 0.95 |
| Lachnospiraceae_UCG.004      | -0.85 | 0.31 | 0.68 | -0.54 | 0.51 | 0.85 | -0.22 | 0.78 | 0.96 | -0.22 | 0.78 | 0.94 | -0.08 | 0.92 | 0.99 |
| Lachnospiraceae_UCG.010      | -0.72 | 0.51 | 0.76 | -0.40 | 0.71 | 0.95 | 0.83  | 0.42 | 0.85 | 0.80  | 0.44 | 0.84 | 0.58  | 0.58 | 0.89 |
| Lactobacillus                | -1.04 | 0.30 | 0.68 | -1.45 | 0.14 | 0.58 | -1.00 | 0.31 | 0.85 | -1.00 | 0.31 | 0.82 | -0.71 | 0.48 | 0.89 |
| Lactococcus                  | -0.79 | 0.51 | 0.76 | -0.50 | 0.67 | 0.93 | 0.20  | 0.86 | 0.98 | 0.17  | 0.88 | 0.99 | 0.11  | 0.92 | 0.99 |
| Marvinbryantia               | -0.59 | 0.42 | 0.71 | -0.34 | 0.65 | 0.93 | 0.11  | 0.88 | 0.99 | 0.09  | 0.90 | 1.00 | 0.06  | 0.94 | 0.99 |
| Megasphaera                  | 0.08  | 0.89 | 0.97 | -0.16 | 0.78 | 0.97 | -0.68 | 0.24 | 0.85 | -0.68 | 0.24 | 0.82 | -0.61 | 0.29 | 0.89 |
| Monoglobus                   | -0.76 | 0.41 | 0.71 | -0.56 | 0.54 | 0.86 | 1.04  | 0.25 | 0.85 | 1.03  | 0.26 | 0.82 | 0.91  | 0.33 | 0.89 |
| Moryella                     | -1.72 | 0.16 | 0.61 | -1.42 | 0.24 | 0.61 | -0.16 | 0.89 | 0.99 | -0.20 | 0.87 | 0.98 | -0.17 | 0.89 | 0.99 |
| Negativibacillus             | 0.33  | 0.69 | 0.94 | 0.55  | 0.50 | 0.84 | 0.40  | 0.61 | 0.92 | 0.41  | 0.61 | 0.92 | 0.31  | 0.70 | 0.95 |
| NK4A214_group                | -0.20 | 0.76 | 0.94 | 0.10  | 0.88 | 0.98 | 0.77  | 0.22 | 0.85 | 0.76  | 0.23 | 0.82 | 0.73  | 0.25 | 0.89 |
| Odoribacter                  | 0.48  | 0.45 | 0.74 | 0.51  | 0.41 | 0.78 | 0.59  | 0.33 | 0.85 | 0.60  | 0.32 | 0.82 | 0.45  | 0.46 | 0.89 |
| Oscillibacter                | 0.18  | 0.87 | 0.97 | 0.37  | 0.73 | 0.95 | 0.75  | 0.48 | 0.85 | 0.72  | 0.50 | 0.84 | 0.74  | 0.48 | 0.89 |
| Oscillospira                 | 1.65  | 0.27 | 0.68 | 1.73  | 0.24 | 0.61 | 1.46  | 0.30 | 0.85 | 1.44  | 0.31 | 0.82 | 1.31  | 0.35 | 0.89 |
| Oxalobacter                  | -1.91 | 0.06 | 0.53 | -1.46 | 0.15 | 0.58 | -0.74 | 0.46 | 0.85 | -0.75 | 0.45 | 0.84 | -1.13 | 0.27 | 0.89 |
| Paludicola                   | -1.23 | 0.25 | 0.68 | -0.53 | 0.63 | 0.93 | 0.41  | 0.70 | 0.95 | 0.35  | 0.74 | 0.94 | 0.28  | 0.80 | 0.99 |
| Parabacteroides              | -0.03 | 0.97 | 0.99 | -0.25 | 0.74 | 0.95 | -0.45 | 0.52 | 0.85 | -0.49 | 0.49 | 0.84 | -0.58 | 0.41 | 0.89 |
| Paraprevotella               | -0.60 | 0.25 | 0.68 | -0.68 | 0.19 | 0.58 | -0.83 | 0.11 | 0.67 | -0.87 | 0.10 | 0.68 | -0.77 | 0.15 | 0.84 |
| Parasutterella               | -0.70 | 0.23 | 0.68 | -0.69 | 0.22 | 0.60 | -0.26 | 0.65 | 0.93 | -0.25 | 0.67 | 0.94 | -0.39 | 0.50 | 0.89 |
| Peptococcus                  | -0.89 | 0.37 | 0.69 | -0.53 | 0.60 | 0.90 | 0.20  | 0.84 | 0.97 | 0.16  | 0.87 | 0.98 | 0.12  | 0.90 | 0.99 |
| Phascolarctobacterium        | -0.17 | 0.75 | 0.94 | -0.17 | 0.74 | 0.95 | -0.11 | 0.83 | 0.97 | -0.13 | 0.80 | 0.94 | -0.28 | 0.59 | 0.89 |
| Phoceia                      | 0.92  | 0.50 | 0.76 | 1.23  | 0.36 | 0.73 | 1.64  | 0.20 | 0.85 | 1.64  | 0.20 | 0.82 | 1.61  | 0.21 | 0.89 |
| Prevotella                   | -0.07 | 0.88 | 0.97 | -0.14 | 0.75 | 0.95 | -0.33 | 0.44 | 0.85 | -0.33 | 0.44 | 0.84 | -0.33 | 0.45 | 0.89 |
| Romboutsia                   | -0.43 | 0.61 | 0.86 | -0.58 | 0.48 | 0.82 | -0.82 | 0.31 | 0.85 | -0.81 | 0.31 | 0.82 | -0.66 | 0.42 | 0.89 |
| Roseburia                    | -1.47 | 0.18 | 0.61 | -1.08 | 0.32 | 0.72 | -0.97 | 0.37 | 0.85 | -0.96 | 0.37 | 0.84 | -0.91 | 0.40 | 0.89 |
| Ruminococcus                 | -0.23 | 0.72 | 0.94 | -0.08 | 0.91 | 0.98 | 0.42  | 0.52 | 0.85 | 0.41  | 0.52 | 0.84 | 0.45  | 0.49 | 0.89 |
| Sellimonas                   | -0.76 | 0.39 | 0.69 | -0.85 | 0.33 | 0.72 | -1.19 | 0.16 | 0.85 | -1.20 | 0.15 | 0.82 | -1.19 | 0.16 | 0.84 |
| Senegalimassilia             | -1.10 | 0.18 | 0.61 | -1.05 | 0.20 | 0.58 | -0.47 | 0.56 | 0.87 | -0.50 | 0.54 | 0.85 | -0.47 | 0.56 | 0.89 |
| Shuttleworthia               | -0.12 | 0.91 | 0.97 | 0.11  | 0.92 | 0.98 | -0.02 | 0.98 | 1.00 | -0.01 | 1.00 | 1.00 | -0.01 | 0.99 | 0.99 |
| Slackia                      | -1.62 | 0.03 | 0.31 | -1.73 | 0.02 | 0.43 | -1.00 | 0.15 | 0.85 | -1.04 | 0.14 | 0.82 | -1.14 | 0.11 | 0.70 |
| Streptococcus                | -0.41 | 0.72 | 0.94 | -0.44 | 0.69 | 0.93 | -0.33 | 0.77 | 0.96 | -0.41 | 0.72 | 0.94 | -0.11 | 0.93 | 0.99 |
| Subdoligranulum              | -0.62 | 0.48 | 0.76 | -0.41 | 0.63 | 0.93 | -0.51 | 0.54 | 0.86 | -0.53 | 0.52 | 0.84 | -0.59 | 0.47 | 0.89 |
| Sutterella                   | -0.25 | 0.62 | 0.86 | -0.38 | 0.44 | 0.80 | -0.85 | 0.07 | 0.62 | -0.86 | 0.07 | 0.59 | -0.83 | 0.08 | 0.61 |
| TM7x                         | 0.24  | 0.84 | 0.97 | 0.50  | 0.67 | 0.93 | 0.12  | 0.91 | 1.00 | 0.10  | 0.93 | 1.00 | 0.09  | 0.94 | 0.99 |
| Turicibacter                 | -1.06 | 0.33 | 0.68 | -1.50 | 0.16 | 0.58 | -2.33 | 0.02 | 0.35 | -2.32 | 0.03 | 0.37 | -2.23 | 0.03 | 0.56 |
| Tuzzerella                   | 2.09  | 0.01 | 0.31 | 2.04  | 0.01 | 0.43 | 1.54  | 0.06 | 0.52 | 1.56  | 0.06 | 0.51 | 1.51  | 0.06 | 0.61 |
| UBA1819                      | 1.97  | 0.12 | 0.61 | 2.13  | 0.09 | 0.58 | 1.49  | 0.22 | 0.85 | 1.46  | 0.23 | 0.82 | 1.40  | 0.25 | 0.89 |
| UCG.002                      | -0.24 | 0.71 | 0.94 | 0.05  | 0.93 | 0.98 | 0.42  | 0.51 | 0.85 | 0.40  | 0.53 | 0.84 | 0.26  | 0.69 | 0.95 |
| UCG.003                      | -1.48 | 0.02 | 0.31 | -1.23 | 0.06 | 0.58 | -1.04 | 0.10 | 0.67 | -1.06 | 0.10 | 0.68 | -1.12 | 0.08 | 0.61 |
| UCG.005                      | -1.18 | 0.11 | 0.61 | -0.97 | 0.19 | 0.58 | -0.14 | 0.85 | 0.97 | -0.19 | 0.80 | 0.94 | -0.25 | 0.75 | 0.97 |
| UCG.009                      | -1.16 | 0.30 | 0.68 | -0.83 | 0.45 | 0.80 | -0.05 | 0.96 | 1.00 | -0.07 | 0.95 | 1.00 | -0.14 | 0.90 | 0.99 |
| Veillonella                  | 0.09  | 0.90 | 0.97 | -0.02 | 0.98 | 0.99 | -0.05 | 0.94 | 1.00 | -0.05 | 0.94 | 1.00 | 0.06  | 0.93 | 0.99 |
| Victivallis                  | -1.21 | 0.10 | 0.61 | -1.05 | 0.15 | 0.58 | -0.60 | 0.39 | 0.85 | -0.59 | 0.40 | 0.84 | -0.59 | 0.40 | 0.89 |

Multivariable-adjusted regression models adjusted for:

Model 1: sequencing batch, age, race, gender, study center

Model 2: Model 1, with education

Model 3: Model 2, with physical activity, diet score, medication use, and smoking

Model 4: Model 3 with BMI

Model 5: Model 4 with hypertension and diabetes

eTable 49: Multivariable-adjusted regression coefficients, p-values, and false discovery rate (FDR)-adjusted p-values for genera among male participants with respect to RAVLT.

|                               | Model1 |         |      | Model2 |         |      | Model3 |         |      | Model4 |         |      | Model5 |         |      |
|-------------------------------|--------|---------|------|--------|---------|------|--------|---------|------|--------|---------|------|--------|---------|------|
|                               | beta   | p-value | FDR  | beta   | p-value | FDR  | beta   | p-value | FDR  | beta   | p-value | FDR  | beta   | p-value | FDR  |
| Acetanaerobacterium           | -0.08  | 0.75    | 0.88 | -0.11  | 0.65    | 0.88 | -0.23  | 0.35    | 0.77 | -0.23  | 0.34    | 0.78 | -0.19  | 0.42    | 0.78 |
| Acidaminococcus               | -0.18  | 0.01    | 0.19 | -0.13  | 0.06    | 0.47 | -0.12  | 0.09    | 0.46 | -0.13  | 0.07    | 0.43 | -0.15  | 0.05    | 0.40 |
| Actinomyces                   | -0.17  | 0.39    | 0.68 | -0.16  | 0.41    | 0.78 | -0.09  | 0.68    | 0.88 | -0.05  | 0.80    | 0.94 | -0.13  | 0.55    | 0.84 |
| Adlercreutzia                 | 0.12   | 0.31    | 0.62 | 0.14   | 0.21    | 0.59 | 0.13   | 0.27    | 0.77 | 0.12   | 0.29    | 0.77 | 0.14   | 0.23    | 0.68 |
| Agathobacter                  | 0.04   | 0.82    | 0.93 | -0.04  | 0.79    | 0.97 | -0.12  | 0.46    | 0.84 | -0.15  | 0.35    | 0.78 | -0.18  | 0.28    | 0.68 |
| Akkermansia                   | 0.09   | 0.26    | 0.58 | 0.03   | 0.74    | 0.95 | 0.02   | 0.81    | 0.93 | 0.02   | 0.85    | 0.94 | 0.03   | 0.72    | 0.89 |
| Alistipes                     | 0.25   | 0.08    | 0.45 | 0.15   | 0.26    | 0.61 | 0.09   | 0.52    | 0.84 | 0.09   | 0.54    | 0.86 | 0.17   | 0.25    | 0.68 |
| Allisonella                   | -0.11  | 0.40    | 0.68 | 0.00   | 0.99    | 0.99 | -0.01  | 0.97    | 0.99 | -0.01  | 0.95    | 0.99 | -0.01  | 0.95    | 0.97 |
| Anaerofilum                   | 0.21   | 0.23    | 0.56 | 0.12   | 0.46    | 0.82 | 0.13   | 0.46    | 0.84 | 0.13   | 0.47    | 0.86 | 0.17   | 0.33    | 0.74 |
| Anaerostipes                  | 0.19   | 0.34    | 0.62 | 0.09   | 0.65    | 0.88 | 0.16   | 0.42    | 0.84 | 0.15   | 0.45    | 0.86 | 0.15   | 0.45    | 0.80 |
| Anaerotruncus                 | 0.04   | 0.81    | 0.93 | -0.04  | 0.80    | 0.97 | -0.01  | 0.95    | 0.99 | 0.01   | 0.94    | 0.99 | 0.05   | 0.77    | 0.89 |
| Bacteroides                   | 0.43   | 0.09    | 0.47 | 0.41   | 0.08    | 0.47 | 0.40   | 0.10    | 0.46 | 0.37   | 0.12    | 0.51 | 0.40   | 0.10    | 0.47 |
| Barnesiella                   | 0.10   | 0.17    | 0.51 | 0.11   | 0.12    | 0.47 | 0.11   | 0.16    | 0.62 | 0.11   | 0.15    | 0.58 | 0.09   | 0.20    | 0.66 |
| Bifidobacterium               | 0.02   | 0.86    | 0.94 | 0.07   | 0.43    | 0.78 | 0.06   | 0.54    | 0.84 | 0.05   | 0.60    | 0.87 | 0.04   | 0.63    | 0.88 |
| Bilophila                     | 0.15   | 0.17    | 0.51 | 0.07   | 0.49    | 0.85 | 0.08   | 0.46    | 0.84 | 0.06   | 0.56    | 0.86 | 0.06   | 0.60    | 0.88 |
| Blautia                       | 0.46   | 0.19    | 0.52 | 0.24   | 0.47    | 0.83 | 0.24   | 0.50    | 0.84 | 0.24   | 0.49    | 0.86 | 0.24   | 0.48    | 0.82 |
| Butyricoccus                  | 0.12   | 0.67    | 0.85 | -0.14  | 0.60    | 0.88 | -0.16  | 0.57    | 0.84 | -0.15  | 0.57    | 0.86 | -0.10  | 0.72    | 0.89 |
| Butyricimonas                 | -0.06  | 0.50    | 0.75 | -0.10  | 0.25    | 0.60 | -0.09  | 0.29    | 0.77 | -0.10  | 0.28    | 0.77 | -0.08  | 0.36    | 0.74 |
| CAG.56                        | 0.16   | 0.10    | 0.49 | 0.11   | 0.24    | 0.59 | 0.10   | 0.29    | 0.77 | 0.10   | 0.28    | 0.77 | 0.12   | 0.21    | 0.66 |
| Candidatus_Soleaferrea        | -0.11  | 0.57    | 0.77 | -0.22  | 0.22    | 0.59 | -0.31  | 0.10    | 0.46 | -0.31  | 0.10    | 0.49 | -0.27  | 0.14    | 0.56 |
| Caproiciproducens             | -0.24  | 0.18    | 0.51 | -0.28  | 0.10    | 0.47 | -0.33  | 0.06    | 0.44 | -0.33  | 0.06    | 0.43 | -0.32  | 0.07    | 0.40 |
| Catenibacterium               | -0.13  | 0.17    | 0.51 | -0.13  | 0.12    | 0.47 | -0.09  | 0.33    | 0.77 | -0.09  | 0.35    | 0.78 | -0.10  | 0.27    | 0.68 |
| Christensenellaceae_R.7_group | 0.03   | 0.70    | 0.87 | -0.02  | 0.77    | 0.96 | -0.05  | 0.53    | 0.84 | -0.05  | 0.57    | 0.86 | -0.03  | 0.73    | 0.89 |
| Clostridium_sensu_stricto_1   | 0.05   | 0.62    | 0.81 | 0.09   | 0.34    | 0.72 | 0.13   | 0.22    | 0.70 | 0.13   | 0.21    | 0.70 | 0.09   | 0.39    | 0.78 |
| Colidextribacter              | -0.19  | 0.35    | 0.63 | -0.32  | 0.09    | 0.47 | -0.37  | 0.06    | 0.44 | -0.38  | 0.06    | 0.43 | -0.39  | 0.05    | 0.40 |
| Collinsella                   | -0.16  | 0.10    | 0.49 | -0.13  | 0.18    | 0.56 | -0.17  | 0.09    | 0.46 | -0.16  | 0.10    | 0.49 | -0.14  | 0.14    | 0.56 |
| Coprobacter                   | 0.02   | 0.84    | 0.94 | -0.01  | 0.88    | 0.97 | -0.04  | 0.65    | 0.87 | -0.04  | 0.70    | 0.89 | -0.01  | 0.90    | 0.93 |
| Coprococcus                   | 0.29   | 0.01    | 0.19 | 0.20   | 0.09    | 0.47 | 0.17   | 0.16    | 0.62 | 0.18   | 0.13    | 0.51 | 0.22   | 0.07    | 0.40 |
| Defluviitaleaceae_UCG.011     | 0.29   | 0.08    | 0.45 | 0.29   | 0.06    | 0.47 | 0.38   | 0.02    | 0.42 | 0.39   | 0.02    | 0.41 | 0.42   | 0.01    | 0.35 |
| Desulfovibrio                 | -0.12  | 0.16    | 0.51 | -0.12  | 0.14    | 0.52 | -0.12  | 0.18    | 0.65 | -0.10  | 0.26    | 0.77 | -0.08  | 0.36    | 0.74 |
| Dialister                     | 0.10   | 0.15    | 0.51 | 0.10   | 0.11    | 0.47 | 0.08   | 0.26    | 0.76 | 0.08   | 0.29    | 0.77 | 0.06   | 0.42    | 0.78 |
| Dorea                         | 0.02   | 0.90    | 0.96 | -0.05  | 0.72    | 0.95 | -0.08  | 0.58    | 0.84 | -0.07  | 0.62    | 0.88 | -0.06  | 0.71    | 0.89 |
| DTU089                        | -0.01  | 0.94    | 0.98 | -0.02  | 0.89    | 0.97 | -0.02  | 0.88    | 0.96 | 0.00   | 0.99    | 1.00 | 0.03   | 0.83    | 0.89 |
| Eggerthella                   | 0.21   | 0.13    | 0.51 | 0.17   | 0.20    | 0.59 | 0.22   | 0.13    | 0.50 | 0.23   | 0.11    | 0.49 | 0.24   | 0.09    | 0.43 |
| Eisenbergiella                | -0.10  | 0.55    | 0.77 | -0.08  | 0.59    | 0.88 | -0.11  | 0.49    | 0.84 | -0.09  | 0.56    | 0.86 | -0.12  | 0.45    | 0.80 |
| Enterorhabdus                 | -0.17  | 0.20    | 0.53 | -0.23  | 0.07    | 0.47 | -0.24  | 0.09    | 0.46 | -0.23  | 0.10    | 0.49 | -0.21  | 0.13    | 0.55 |
| Erysipelatoclostridium        | 0.22   | 0.15    | 0.51 | 0.27   | 0.07    | 0.47 | 0.31   | 0.04    | 0.44 | 0.33   | 0.03    | 0.41 | 0.30   | 0.05    | 0.40 |
| Erysipelotrichaceae_UCG.003   | 0.01   | 0.91    | 0.97 | -0.01  | 0.91    | 0.97 | -0.06  | 0.59    | 0.84 | -0.06  | 0.57    | 0.86 | -0.04  | 0.69    | 0.89 |
| Escherichia_Shigella          | -0.08  | 0.43    | 0.69 | 0.00   | 0.98    | 0.99 | 0.03   | 0.79    | 0.93 | 0.02   | 0.85    | 0.94 | 0.03   | 0.77    | 0.89 |
| Faecalibacterium              | 0.24   | 0.16    | 0.51 | 0.26   | 0.11    | 0.47 | 0.31   | 0.07    | 0.45 | 0.32   | 0.07    | 0.43 | 0.33   | 0.05    | 0.40 |
| Family_XIII_AD3011_group      | 0.22   | 0.11    | 0.50 | 0.07   | 0.60    | 0.88 | 0.04   | 0.79    | 0.93 | 0.07   | 0.65    | 0.88 | 0.11   | 0.43    | 0.78 |
| Family_XIII_UCG.001           | -0.05  | 0.74    | 0.88 | -0.12  | 0.41    | 0.78 | -0.10  | 0.56    | 0.84 | -0.07  | 0.68    | 0.88 | -0.03  | 0.84    | 0.89 |
| FD2005                        | -0.04  | 0.80    | 0.93 | -0.01  | 0.93    | 0.97 | -0.09  | 0.53    | 0.84 | -0.12  | 0.42    | 0.85 | -0.10  | 0.50    | 0.82 |
| Flavonifractor                | -0.01  | 0.96    | 0.99 | 0.02   | 0.90    | 0.97 | -0.01  | 0.92    | 0.99 | -0.02  | 0.89    | 0.97 | -0.04  | 0.77    | 0.89 |
| Fournierella                  | 0.08   | 0.57    | 0.77 | 0.06   | 0.63    | 0.88 | 0.09   | 0.52    | 0.84 | 0.10   | 0.46    | 0.86 | 0.14   | 0.32    | 0.74 |
| Frisingicoccus                | -0.02  | 0.85    | 0.94 | 0.02   | 0.88    | 0.97 | -0.05  | 0.68    | 0.88 | -0.06  | 0.63    | 0.88 | -0.04  | 0.73    | 0.89 |
| Fusicatenibacter              | 0.04   | 0.74    | 0.88 | 0.01   | 0.92    | 0.97 | -0.03  | 0.83    | 0.93 | -0.04  | 0.77    | 0.93 | -0.03  | 0.83    | 0.89 |
| Fusobacterium                 | 0.00   | 0.98    | 0.99 | 0.09   | 0.57    | 0.88 | 0.13   | 0.41    | 0.84 | 0.15   | 0.34    | 0.78 | 0.17   | 0.28    | 0.68 |
| GCA.900066575                 | -0.11  | 0.45    | 0.70 | -0.18  | 0.18    | 0.58 | -0.18  | 0.21    | 0.70 | -0.17  | 0.24    | 0.77 | -0.14  | 0.35    | 0.74 |
| Gordonibacter                 | 0.18   | 0.27    | 0.58 | 0.13   | 0.39    | 0.78 | 0.15   | 0.35    | 0.77 | 0.17   | 0.30    | 0.77 | 0.21   | 0.19    | 0.66 |
| Granulicatella                | 0.04   | 0.86    | 0.94 | 0.13   | 0.52    | 0.88 | 0.15   | 0.50    | 0.84 | 0.16   | 0.47    | 0.86 | 0.11   | 0.62    | 0.88 |
| Haemophilus                   | 0.14   | 0.17    | 0.51 | 0.14   | 0.15    | 0.53 | 0.14   | 0.19    | 0.66 | 0.15   | 0.17    | 0.63 | 0.16   | 0.15    | 0.56 |
| Harriflintia                  | -0.01  | 0.97    | 0.99 | -0.09  | 0.60    | 0.88 | -0.05  | 0.80    | 0.93 | -0.04  | 0.82    | 0.94 | 0.01   | 0.98    | 0.99 |
| Holdemania                    | -0.08  | 0.44    | 0.70 | -0.08  | 0.38    | 0.78 | -0.11  | 0.28    | 0.77 | -0.11  | 0.28    | 0.77 | -0.09  | 0.35    | 0.74 |

|                               |       |      |      |       |      |      |       |      |      |       |      |      |       |      |      |
|-------------------------------|-------|------|------|-------|------|------|-------|------|------|-------|------|------|-------|------|------|
| Holdemania                    | -0.01 | 0.98 | 0.99 | 0.04  | 0.88 | 0.97 | -0.10 | 0.74 | 0.93 | -0.06 | 0.84 | 0.94 | 0.00  | 1.00 | 1.00 |
| Howardella                    | -0.23 | 0.06 | 0.45 | -0.26 | 0.02 | 0.35 | -0.24 | 0.05 | 0.44 | -0.23 | 0.07 | 0.43 | -0.23 | 0.06 | 0.40 |
| Hungatella                    | -0.10 | 0.52 | 0.75 | -0.07 | 0.64 | 0.88 | -0.08 | 0.61 | 0.84 | -0.06 | 0.68 | 0.88 | -0.10 | 0.49 | 0.82 |
| Hydrogenoanaerobacterium      | 0.28  | 0.11 | 0.50 | 0.14  | 0.39 | 0.78 | 0.17  | 0.34 | 0.77 | 0.18  | 0.31 | 0.77 | 0.20  | 0.25 | 0.68 |
| Incertae_Sedis                | 0.23  | 0.36 | 0.63 | 0.25  | 0.28 | 0.63 | 0.15  | 0.56 | 0.84 | 0.14  | 0.57 | 0.86 | 0.15  | 0.55 | 0.84 |
| Intestinibacter               | 0.28  | 0.03 | 0.29 | 0.34  | 0.01 | 0.34 | 0.31  | 0.02 | 0.42 | 0.30  | 0.02 | 0.41 | 0.31  | 0.02 | 0.40 |
| Intestinimonas                | 0.20  | 0.12 | 0.51 | 0.06  | 0.66 | 0.88 | 0.06  | 0.65 | 0.87 | 0.06  | 0.66 | 0.88 | 0.11  | 0.41 | 0.78 |
| Lachnoclostridium             | -0.32 | 0.24 | 0.56 | -0.25 | 0.33 | 0.72 | -0.14 | 0.60 | 0.84 | -0.17 | 0.54 | 0.86 | -0.22 | 0.41 | 0.78 |
| Lachnospira                   | 0.31  | 0.02 | 0.23 | 0.19  | 0.16 | 0.53 | 0.14  | 0.33 | 0.77 | 0.13  | 0.37 | 0.79 | 0.15  | 0.28 | 0.68 |
| Lachnospiraceae_FCS020_group  | 0.24  | 0.07 | 0.45 | 0.15  | 0.22 | 0.59 | 0.14  | 0.32 | 0.77 | 0.14  | 0.31 | 0.77 | 0.15  | 0.26 | 0.68 |
| Lachnospiraceae_ND3007_group  | 0.22  | 0.02 | 0.20 | 0.15  | 0.08 | 0.47 | 0.15  | 0.11 | 0.48 | 0.15  | 0.11 | 0.49 | 0.17  | 0.07 | 0.40 |
| Lachnospiraceae_NK4A136_group | 0.18  | 0.17 | 0.51 | 0.08  | 0.55 | 0.88 | -0.01 | 0.96 | 0.99 | 0.00  | 1.00 | 1.00 | 0.04  | 0.76 | 0.89 |
| Lachnospiraceae_UCG.001       | 0.25  | 0.01 | 0.19 | 0.21  | 0.02 | 0.35 | 0.22  | 0.03 | 0.44 | 0.22  | 0.02 | 0.41 | 0.22  | 0.02 | 0.40 |
| Lachnospiraceae_UCG.004       | 0.08  | 0.51 | 0.75 | 0.00  | 0.98 | 0.99 | -0.02 | 0.87 | 0.96 | -0.02 | 0.86 | 0.94 | -0.06 | 0.63 | 0.88 |
| Lachnospiraceae_UCG.010       | -0.05 | 0.75 | 0.88 | -0.13 | 0.36 | 0.76 | -0.15 | 0.33 | 0.77 | -0.13 | 0.40 | 0.83 | -0.09 | 0.55 | 0.84 |
| Lactobacillus                 | -0.39 | 0.01 | 0.19 | -0.30 | 0.03 | 0.35 | -0.36 | 0.01 | 0.42 | -0.36 | 0.01 | 0.41 | -0.46 | 0.00 | 0.16 |
| Lactococcus                   | -0.03 | 0.88 | 0.95 | -0.10 | 0.52 | 0.88 | -0.05 | 0.76 | 0.93 | -0.04 | 0.84 | 0.94 | -0.03 | 0.85 | 0.89 |
| Marvinbryantia                | 0.08  | 0.45 | 0.70 | 0.01  | 0.89 | 0.97 | 0.03  | 0.80 | 0.93 | 0.03  | 0.75 | 0.93 | 0.05  | 0.61 | 0.88 |
| Megasphaera                   | -0.23 | 0.01 | 0.19 | -0.17 | 0.03 | 0.39 | -0.16 | 0.06 | 0.44 | -0.16 | 0.06 | 0.43 | -0.17 | 0.04 | 0.40 |
| Monoglobus                    | 0.33  | 0.01 | 0.19 | 0.28  | 0.02 | 0.35 | 0.29  | 0.03 | 0.44 | 0.30  | 0.03 | 0.41 | 0.31  | 0.02 | 0.40 |
| Moryella                      | 0.17  | 0.33 | 0.62 | 0.09  | 0.57 | 0.88 | 0.00  | 1.00 | 1.00 | 0.02  | 0.92 | 0.97 | 0.03  | 0.88 | 0.92 |
| Negativibacillus              | -0.13 | 0.26 | 0.58 | -0.19 | 0.09 | 0.47 | -0.21 | 0.08 | 0.46 | -0.21 | 0.08 | 0.43 | -0.19 | 0.11 | 0.51 |
| NK4A214_group                 | 0.09  | 0.33 | 0.62 | 0.02  | 0.86 | 0.97 | 0.02  | 0.82 | 0.93 | 0.03  | 0.76 | 0.93 | 0.06  | 0.53 | 0.84 |
| Odoribacter                   | 0.11  | 0.22 | 0.56 | 0.10  | 0.24 | 0.59 | 0.09  | 0.32 | 0.77 | 0.09  | 0.34 | 0.78 | 0.12  | 0.19 | 0.66 |
| Oscillibacter                 | 0.20  | 0.19 | 0.52 | 0.16  | 0.28 | 0.63 | 0.06  | 0.72 | 0.92 | 0.07  | 0.65 | 0.88 | 0.08  | 0.62 | 0.88 |
| Oscillospira                  | 0.13  | 0.56 | 0.77 | 0.10  | 0.62 | 0.88 | 0.03  | 0.87 | 0.96 | 0.05  | 0.81 | 0.94 | 0.08  | 0.69 | 0.89 |
| Oxalobacter                   | 0.18  | 0.21 | 0.55 | 0.06  | 0.65 | 0.88 | 0.12  | 0.43 | 0.84 | 0.12  | 0.41 | 0.84 | 0.19  | 0.21 | 0.66 |
| Paludicola                    | 0.17  | 0.28 | 0.58 | -0.01 | 0.93 | 0.97 | 0.01  | 0.95 | 0.99 | 0.05  | 0.78 | 0.93 | 0.09  | 0.57 | 0.87 |
| Parabacteroides               | -0.11 | 0.32 | 0.62 | -0.05 | 0.61 | 0.88 | -0.06 | 0.59 | 0.84 | -0.04 | 0.70 | 0.89 | -0.03 | 0.79 | 0.89 |
| Paraprevotella                | -0.04 | 0.62 | 0.81 | -0.02 | 0.80 | 0.97 | 0.00  | 0.98 | 0.99 | 0.01  | 0.92 | 0.97 | -0.03 | 0.74 | 0.89 |
| Parasutterella                | 0.15  | 0.07 | 0.45 | 0.15  | 0.06 | 0.47 | 0.08  | 0.34 | 0.77 | 0.08  | 0.37 | 0.79 | 0.11  | 0.21 | 0.66 |
| Peptococcus                   | -0.09 | 0.51 | 0.75 | -0.19 | 0.16 | 0.53 | -0.29 | 0.04 | 0.44 | -0.28 | 0.06 | 0.43 | -0.25 | 0.08 | 0.43 |
| Phascolarctobacterium         | -0.06 | 0.43 | 0.69 | -0.06 | 0.41 | 0.78 | -0.06 | 0.44 | 0.84 | -0.05 | 0.51 | 0.86 | -0.02 | 0.78 | 0.89 |
| Phoceia                       | -0.23 | 0.24 | 0.56 | -0.31 | 0.09 | 0.47 | -0.36 | 0.06 | 0.44 | -0.36 | 0.06 | 0.43 | -0.36 | 0.06 | 0.40 |
| Prevotella                    | -0.16 | 0.01 | 0.19 | -0.14 | 0.02 | 0.35 | -0.13 | 0.04 | 0.44 | -0.13 | 0.04 | 0.43 | -0.14 | 0.03 | 0.40 |
| Romboutsia                    | 0.10  | 0.42 | 0.69 | 0.13  | 0.24 | 0.59 | 0.08  | 0.49 | 0.84 | 0.08  | 0.50 | 0.86 | 0.06  | 0.64 | 0.88 |
| Roseburia                     | 0.15  | 0.34 | 0.62 | 0.05  | 0.76 | 0.96 | -0.10 | 0.52 | 0.84 | -0.11 | 0.49 | 0.86 | -0.10 | 0.51 | 0.83 |
| Ruminococcus                  | 0.14  | 0.13 | 0.51 | 0.10  | 0.25 | 0.60 | 0.07  | 0.46 | 0.84 | 0.07  | 0.44 | 0.86 | 0.08  | 0.42 | 0.78 |
| Sellimonas                    | 0.13  | 0.31 | 0.62 | 0.15  | 0.22 | 0.59 | 0.15  | 0.24 | 0.73 | 0.16  | 0.21 | 0.70 | 0.15  | 0.24 | 0.68 |
| Senegalimassilia              | -0.19 | 0.10 | 0.49 | -0.21 | 0.06 | 0.47 | -0.22 | 0.06 | 0.44 | -0.21 | 0.08 | 0.43 | -0.23 | 0.05 | 0.40 |
| Shuttleworthia                | 0.29  | 0.06 | 0.45 | 0.23  | 0.12 | 0.47 | 0.25  | 0.12 | 0.48 | 0.24  | 0.13 | 0.51 | 0.22  | 0.15 | 0.56 |
| Slackia                       | -0.26 | 0.01 | 0.19 | -0.23 | 0.02 | 0.35 | -0.25 | 0.02 | 0.42 | -0.24 | 0.02 | 0.41 | -0.22 | 0.03 | 0.40 |
| Streptococcus                 | 0.00  | 0.99 | 0.99 | 0.01  | 0.94 | 0.97 | 0.05  | 0.75 | 0.93 | 0.09  | 0.58 | 0.86 | 0.04  | 0.82 | 0.89 |
| Subdoligranulum               | 0.10  | 0.41 | 0.68 | 0.05  | 0.66 | 0.88 | -0.01 | 0.95 | 0.99 | 0.00  | 0.99 | 1.00 | 0.03  | 0.81 | 0.89 |
| Sutterella                    | -0.14 | 0.05 | 0.44 | -0.10 | 0.12 | 0.47 | -0.06 | 0.39 | 0.84 | -0.05 | 0.44 | 0.86 | -0.07 | 0.34 | 0.74 |
| TM7x                          | 0.08  | 0.63 | 0.81 | 0.02  | 0.88 | 0.97 | 0.09  | 0.57 | 0.84 | 0.11  | 0.52 | 0.86 | 0.11  | 0.50 | 0.82 |
| Turicibacter                  | 0.37  | 0.02 | 0.20 | 0.48  | 0.00 | 0.11 | 0.47  | 0.00 | 0.26 | 0.45  | 0.00 | 0.36 | 0.45  | 0.00 | 0.19 |
| Tuzzerella                    | -0.14 | 0.23 | 0.56 | -0.13 | 0.24 | 0.59 | -0.21 | 0.08 | 0.46 | -0.22 | 0.07 | 0.43 | -0.21 | 0.09 | 0.43 |
| UBA1819                       | -0.09 | 0.61 | 0.81 | -0.13 | 0.43 | 0.78 | -0.21 | 0.26 | 0.76 | -0.19 | 0.31 | 0.77 | -0.17 | 0.36 | 0.74 |
| UCG.002                       | 0.04  | 0.63 | 0.81 | -0.03 | 0.74 | 0.95 | -0.06 | 0.55 | 0.84 | -0.05 | 0.61 | 0.88 | -0.01 | 0.91 | 0.93 |
| UCG.003                       | 0.06  | 0.53 | 0.76 | -0.01 | 0.90 | 0.97 | -0.05 | 0.62 | 0.85 | -0.04 | 0.68 | 0.88 | -0.02 | 0.81 | 0.89 |
| UCG.005                       | 0.04  | 0.73 | 0.88 | -0.02 | 0.87 | 0.97 | -0.03 | 0.82 | 0.93 | -0.01 | 0.96 | 0.99 | 0.02  | 0.83 | 0.89 |
| UCG.009                       | 0.16  | 0.32 | 0.62 | 0.08  | 0.59 | 0.88 | 0.01  | 0.96 | 0.99 | 0.02  | 0.91 | 0.97 | 0.06  | 0.72 | 0.89 |
| Veillonella                   | 0.12  | 0.27 | 0.58 | 0.15  | 0.15 | 0.53 | 0.14  | 0.20 | 0.68 | 0.14  | 0.20 | 0.69 | 0.13  | 0.23 | 0.68 |
| Victivallis                   | 0.04  | 0.72 | 0.88 | 0.00  | 0.98 | 0.99 | -0.03 | 0.79 | 0.93 | -0.03 | 0.78 | 0.93 | -0.03 | 0.78 | 0.89 |

Multivariable-adjusted regression models adjusted for:

Model 1: sequencing batch, age, race, gender, study center

Model 2: Model 1, with education



Model 3: Model 2, with physical activity, diet score, medication use, and smoking

Model 4: Model 3 with BMI

Model 5: Model 4 with hypertension and diabetes

eTable 50: Multivariable-adjusted regression coefficients, p-values, and false discovery rate (FDR)-adjusted p-values for genera among male participants with respect to category fluency.

|                               | Model1 |         |      | Model2 |         |      | Model3 |         |      | Model4 |         |      | Model5 |         |      |
|-------------------------------|--------|---------|------|--------|---------|------|--------|---------|------|--------|---------|------|--------|---------|------|
|                               | beta   | p-value | FDR  | beta   | p-value | FDR  | beta   | p-value | FDR  | beta   | p-value | FDR  | beta   | p-value | FDR  |
| Acetanaerobacterium           | -0.14  | 0.85    | 0.93 | -0.20  | 0.78    | 0.88 | -0.42  | 0.58    | 0.79 | -0.42  | 0.58    | 0.79 | -0.39  | 0.61    | 0.81 |
| Acidaminococcus               | -0.24  | 0.26    | 0.49 | -0.13  | 0.52    | 0.71 | -0.16  | 0.50    | 0.73 | -0.15  | 0.52    | 0.76 | -0.17  | 0.47    | 0.70 |
| Actinomyces                   | 0.41   | 0.50    | 0.69 | 0.44   | 0.45    | 0.64 | 0.61   | 0.35    | 0.59 | 0.58   | 0.37    | 0.63 | 0.52   | 0.43    | 0.67 |
| Adlercreutzia                 | 0.06   | 0.87    | 0.93 | 0.10   | 0.77    | 0.88 | -0.04  | 0.91    | 0.93 | -0.03  | 0.93    | 0.94 | -0.02  | 0.97    | 0.97 |
| Agathobacter                  | 0.98   | 0.04    | 0.32 | 0.82   | 0.09    | 0.31 | 0.81   | 0.11    | 0.40 | 0.86   | 0.09    | 0.36 | 0.85   | 0.10    | 0.37 |
| Akkermansia                   | -0.20  | 0.41    | 0.64 | -0.36  | 0.14    | 0.39 | -0.48  | 0.07    | 0.39 | -0.48  | 0.07    | 0.36 | -0.47  | 0.08    | 0.37 |
| Alistipes                     | 0.01   | 0.98    | 0.99 | -0.22  | 0.60    | 0.78 | -0.45  | 0.31    | 0.55 | -0.45  | 0.32    | 0.56 | -0.40  | 0.38    | 0.64 |
| Allisonella                   | 0.06   | 0.88    | 0.94 | 0.32   | 0.41    | 0.63 | 0.24   | 0.58    | 0.79 | 0.24   | 0.58    | 0.79 | 0.23   | 0.59    | 0.81 |
| Anaerofilum                   | -0.33  | 0.54    | 0.71 | -0.53  | 0.30    | 0.55 | -0.64  | 0.25    | 0.50 | -0.64  | 0.25    | 0.51 | -0.62  | 0.27    | 0.52 |
| Anaerostipes                  | -0.39  | 0.51    | 0.69 | -0.62  | 0.28    | 0.55 | -0.57  | 0.36    | 0.61 | -0.55  | 0.37    | 0.63 | -0.59  | 0.35    | 0.61 |
| Anaerotruncus                 | -0.76  | 0.11    | 0.40 | -0.94  | 0.04    | 0.29 | -0.97  | 0.05    | 0.38 | -1.00  | 0.05    | 0.36 | -0.99  | 0.05    | 0.37 |
| Bacteroides                   | 0.24   | 0.74    | 0.86 | 0.22   | 0.76    | 0.88 | 0.31   | 0.68    | 0.84 | 0.34   | 0.65    | 0.82 | 0.39   | 0.61    | 0.81 |
| Barnesiella                   | 0.58   | 0.01    | 0.11 | 0.60   | 0.01    | 0.13 | 0.56   | 0.02    | 0.24 | 0.56   | 0.02    | 0.25 | 0.56   | 0.02    | 0.27 |
| Bifidobacterium               | 0.40   | 0.16    | 0.40 | 0.53   | 0.06    | 0.29 | 0.47   | 0.10    | 0.39 | 0.48   | 0.09    | 0.36 | 0.47   | 0.10    | 0.37 |
| Bilophila                     | 0.87   | 0.01    | 0.11 | 0.71   | 0.02    | 0.26 | 0.68   | 0.05    | 0.36 | 0.71   | 0.04    | 0.33 | 0.74   | 0.03    | 0.32 |
| Blautia                       | -0.67  | 0.52    | 0.69 | -1.19  | 0.24    | 0.49 | -1.10  | 0.31    | 0.55 | -1.10  | 0.31    | 0.56 | -1.09  | 0.32    | 0.58 |
| Butyricoccus                  | 1.03   | 0.20    | 0.45 | 0.49   | 0.53    | 0.71 | 0.40   | 0.64    | 0.83 | 0.40   | 0.64    | 0.82 | 0.39   | 0.65    | 0.81 |
| Butyricimonas                 | 0.34   | 0.21    | 0.45 | 0.26   | 0.32    | 0.55 | 0.30   | 0.27    | 0.51 | 0.30   | 0.27    | 0.53 | 0.33   | 0.24    | 0.50 |
| CAG.56                        | 0.50   | 0.08    | 0.39 | 0.39   | 0.16    | 0.40 | 0.38   | 0.20    | 0.47 | 0.38   | 0.21    | 0.47 | 0.41   | 0.18    | 0.44 |
| Candidatus_Soleaferrea        | -0.63  | 0.26    | 0.49 | -0.88  | 0.11    | 0.35 | -0.96  | 0.10    | 0.39 | -0.96  | 0.10    | 0.36 | -0.95  | 0.11    | 0.37 |
| Caproiciproducens             | -1.20  | 0.02    | 0.22 | -1.29  | 0.01    | 0.19 | -1.37  | 0.01    | 0.24 | -1.36  | 0.01    | 0.25 | -1.40  | 0.01    | 0.25 |
| Catenibacterium               | 0.04   | 0.87    | 0.93 | 0.02   | 0.93    | 0.95 | 0.08   | 0.77    | 0.88 | 0.08   | 0.78    | 0.87 | 0.06   | 0.85    | 0.90 |
| Christensenellaceae_R.7_group | 0.34   | 0.18    | 0.43 | 0.21   | 0.39    | 0.61 | 0.10   | 0.71    | 0.85 | 0.09   | 0.73    | 0.86 | 0.10   | 0.71    | 0.85 |
| Clostridium_sensu_stricto_1   | 0.42   | 0.16    | 0.40 | 0.51   | 0.08    | 0.29 | 0.59   | 0.07    | 0.39 | 0.58   | 0.07    | 0.36 | 0.56   | 0.09    | 0.37 |
| Collidextribacter             | -0.58  | 0.33    | 0.58 | -0.87  | 0.13    | 0.39 | -0.75  | 0.23    | 0.47 | -0.75  | 0.23    | 0.48 | -0.80  | 0.21    | 0.47 |
| Collinsella                   | 0.43   | 0.15    | 0.40 | 0.51   | 0.08    | 0.29 | 0.47   | 0.13    | 0.42 | 0.47   | 0.13    | 0.41 | 0.47   | 0.13    | 0.40 |
| Coprobacter                   | 0.54   | 0.07    | 0.38 | 0.47   | 0.10    | 0.35 | 0.37   | 0.22    | 0.47 | 0.37   | 0.23    | 0.48 | 0.40   | 0.19    | 0.44 |
| Coprococcus                   | 0.67   | 0.06    | 0.36 | 0.46   | 0.20    | 0.44 | 0.42   | 0.26    | 0.51 | 0.41   | 0.28    | 0.53 | 0.43   | 0.26    | 0.52 |
| Defluviitaleaceae_UCG.011     | -0.17  | 0.74    | 0.86 | -0.17  | 0.73    | 0.88 | -0.19  | 0.71    | 0.85 | -0.19  | 0.71    | 0.85 | -0.18  | 0.73    | 0.86 |
| Desulfovibrio                 | -0.37  | 0.16    | 0.40 | -0.37  | 0.15    | 0.40 | -0.49  | 0.08    | 0.39 | -0.53  | 0.06    | 0.36 | -0.51  | 0.08    | 0.37 |
| Dialister                     | -0.04  | 0.85    | 0.93 | -0.03  | 0.87    | 0.93 | -0.07  | 0.75    | 0.87 | -0.07  | 0.77    | 0.87 | -0.10  | 0.66    | 0.81 |
| Dorea                         | 0.49   | 0.28    | 0.50 | 0.34   | 0.44    | 0.64 | 0.31   | 0.51    | 0.74 | 0.30   | 0.52    | 0.76 | 0.32   | 0.50    | 0.72 |
| DTU089                        | -0.53  | 0.23    | 0.46 | -0.55  | 0.20    | 0.44 | -0.72  | 0.11    | 0.40 | -0.77  | 0.10    | 0.36 | -0.76  | 0.11    | 0.37 |
| Eggerthella                   | -0.70  | 0.10    | 0.40 | -0.79  | 0.05    | 0.29 | -0.69  | 0.12    | 0.41 | -0.70  | 0.12    | 0.40 | -0.70  | 0.12    | 0.39 |
| Eisenbergiella                | -1.36  | 0.00    | 0.10 | -1.32  | 0.00    | 0.12 | -1.43  | 0.00    | 0.16 | -1.47  | 0.00    | 0.14 | -1.49  | 0.00    | 0.12 |
| Enterorhabdus                 | -0.32  | 0.43    | 0.64 | -0.45  | 0.24    | 0.49 | -0.52  | 0.23    | 0.47 | -0.53  | 0.23    | 0.48 | -0.54  | 0.22    | 0.49 |
| Erysipelatoclostridium        | -0.96  | 0.04    | 0.32 | -0.87  | 0.05    | 0.29 | -0.70  | 0.14    | 0.42 | -0.73  | 0.13    | 0.41 | -0.76  | 0.12    | 0.39 |
| Erysipelotrichaceae_UCG.003   | 0.50   | 0.13    | 0.40 | 0.44   | 0.16    | 0.40 | 0.34   | 0.31    | 0.55 | 0.35   | 0.31    | 0.56 | 0.35   | 0.30    | 0.56 |
| Escherichia.Shigella          | -0.41  | 0.19    | 0.44 | -0.24  | 0.45    | 0.64 | -0.24  | 0.48    | 0.72 | -0.23  | 0.50    | 0.74 | -0.21  | 0.53    | 0.76 |
| Faecalibacterium              | 0.47   | 0.35    | 0.59 | 0.51   | 0.30    | 0.55 | 0.76   | 0.16    | 0.43 | 0.75   | 0.17    | 0.43 | 0.74   | 0.18    | 0.44 |
| Family_XIII_AD3011_group      | 0.31   | 0.45    | 0.65 | -0.03  | 0.94    | 0.95 | -0.14  | 0.75    | 0.87 | -0.17  | 0.70    | 0.85 | -0.15  | 0.74    | 0.87 |
| Family_XIII_UCG.001           | 0.17   | 0.72    | 0.86 | 0.02   | 0.97    | 0.97 | -0.13  | 0.79    | 0.88 | -0.17  | 0.75    | 0.86 | -0.15  | 0.78    | 0.89 |
| FD2005                        | -0.61  | 0.15    | 0.40 | -0.56  | 0.17    | 0.41 | -0.66  | 0.14    | 0.42 | -0.65  | 0.15    | 0.43 | -0.66  | 0.15    | 0.42 |
| Flavonifractor                | -0.30  | 0.44    | 0.65 | -0.25  | 0.50    | 0.69 | -0.11  | 0.79    | 0.88 | -0.11  | 0.80    | 0.88 | -0.13  | 0.75    | 0.87 |
| Fournierella                  | 0.00   | 1.00    | 1.00 | -0.04  | 0.93    | 0.95 | -0.19  | 0.67    | 0.84 | -0.20  | 0.64    | 0.82 | -0.19  | 0.67    | 0.81 |
| Frisingicoccus                | -0.42  | 0.26    | 0.49 | -0.33  | 0.36    | 0.59 | -0.33  | 0.39    | 0.63 | -0.32  | 0.41    | 0.65 | -0.30  | 0.45    | 0.69 |
| Fusicatenibacter              | 0.59   | 0.11    | 0.40 | 0.53   | 0.15    | 0.40 | 0.53   | 0.17    | 0.43 | 0.54   | 0.16    | 0.43 | 0.55   | 0.16    | 0.43 |
| Fusobacterium                 | -0.31  | 0.51    | 0.69 | -0.12  | 0.80    | 0.88 | -0.05  | 0.93    | 0.93 | -0.07  | 0.89    | 0.93 | -0.02  | 0.97    | 0.97 |
| GCA.900066575                 | 0.61   | 0.17    | 0.40 | 0.45   | 0.29    | 0.55 | 0.37   | 0.41    | 0.65 | 0.36   | 0.42    | 0.67 | 0.37   | 0.42    | 0.67 |
| Gordonibacter                 | -0.36  | 0.46    | 0.66 | -0.47  | 0.32    | 0.55 | -0.28  | 0.58    | 0.79 | -0.30  | 0.56    | 0.79 | -0.27  | 0.60    | 0.81 |
| Granulicatella                | -0.34  | 0.59    | 0.75 | -0.14  | 0.82    | 0.88 | 0.07   | 0.92    | 0.93 | 0.06   | 0.93    | 0.94 | 0.03   | 0.97    | 0.97 |
| Haemophilus                   | 0.60   | 0.05    | 0.34 | 0.60   | 0.05    | 0.29 | 0.57   | 0.09    | 0.39 | 0.57   | 0.09    | 0.36 | 0.56   | 0.10    | 0.37 |
| Harryflintia                  | -0.77  | 0.14    | 0.40 | -0.95  | 0.06    | 0.29 | -1.19  | 0.03    | 0.36 | -1.20  | 0.03    | 0.33 | -1.17  | 0.04    | 0.32 |
| Holdemanella                  | 0.44   | 0.15    | 0.40 | 0.43   | 0.14    | 0.40 | 0.54   | 0.09    | 0.39 | 0.54   | 0.09    | 0.36 | 0.56   | 0.08    | 0.37 |

|                               |       |      |      |       |      |      |       |      |      |       |      |      |       |      |      |
|-------------------------------|-------|------|------|-------|------|------|-------|------|------|-------|------|------|-------|------|------|
| Holdemania                    | -1.40 | 0.09 | 0.40 | -1.30 | 0.11 | 0.35 | -1.45 | 0.10 | 0.39 | -1.51 | 0.09 | 0.36 | -1.46 | 0.10 | 0.37 |
| Howardella                    | -0.30 | 0.42 | 0.64 | -0.36 | 0.32 | 0.55 | -0.28 | 0.47 | 0.72 | -0.30 | 0.44 | 0.69 | -0.31 | 0.43 | 0.67 |
| Hungatella                    | -1.73 | 0.00 | 0.01 | -1.67 | 0.00 | 0.01 | -1.63 | 0.00 | 0.02 | -1.66 | 0.00 | 0.02 | -1.71 | 0.00 | 0.01 |
| Hydrogenoanaerobacterium      | 0.34  | 0.52 | 0.69 | 0.04  | 0.94 | 0.95 | -0.29 | 0.60 | 0.81 | -0.31 | 0.58 | 0.79 | -0.32 | 0.57 | 0.79 |
| Incertae_Sedis                | -0.80 | 0.28 | 0.50 | -0.74 | 0.30 | 0.55 | -0.75 | 0.34 | 0.59 | -0.74 | 0.35 | 0.60 | -0.72 | 0.36 | 0.62 |
| Intestinibacter               | 0.55  | 0.16 | 0.40 | 0.67  | 0.08 | 0.29 | 0.55  | 0.18 | 0.44 | 0.59  | 0.16 | 0.43 | 0.57  | 0.18 | 0.44 |
| Intestinimonas                | -0.34 | 0.38 | 0.61 | -0.69 | 0.07 | 0.29 | -0.92 | 0.03 | 0.36 | -0.92 | 0.03 | 0.33 | -0.90 | 0.03 | 0.32 |
| Lachnoclostridium             | -1.15 | 0.16 | 0.40 | -1.01 | 0.21 | 0.45 | -0.55 | 0.52 | 0.74 | -0.53 | 0.54 | 0.77 | -0.54 | 0.53 | 0.76 |
| Lachnospira                   | 1.21  | 0.00 | 0.10 | 0.95  | 0.02 | 0.24 | 0.65  | 0.15 | 0.43 | 0.67  | 0.14 | 0.41 | 0.67  | 0.14 | 0.40 |
| Lachnospiraceae_FCS020_group  | 0.56  | 0.15 | 0.40 | 0.37  | 0.33 | 0.55 | 0.37  | 0.38 | 0.63 | 0.37  | 0.39 | 0.64 | 0.37  | 0.39 | 0.65 |
| Lachnospiraceae_ND3007_group  | 0.72  | 0.01 | 0.11 | 0.59  | 0.03 | 0.29 | 0.61  | 0.04 | 0.36 | 0.62  | 0.04 | 0.33 | 0.62  | 0.03 | 0.32 |
| Lachnospiraceae_NK4A136_group | 0.36  | 0.36 | 0.59 | 0.13  | 0.74 | 0.88 | -0.20 | 0.63 | 0.83 | -0.21 | 0.62 | 0.82 | -0.19 | 0.65 | 0.81 |
| Lachnospiraceae_UCG.001       | 0.02  | 0.93 | 0.97 | -0.07 | 0.81 | 0.88 | -0.22 | 0.47 | 0.72 | -0.22 | 0.47 | 0.71 | -0.23 | 0.46 | 0.69 |
| Lachnospiraceae_UCG.004       | 0.36  | 0.31 | 0.56 | 0.18  | 0.60 | 0.78 | 0.17  | 0.65 | 0.83 | 0.17  | 0.64 | 0.82 | 0.14  | 0.70 | 0.85 |
| Lachnospiraceae_UCG.010       | -0.67 | 0.15 | 0.40 | -0.86 | 0.06 | 0.29 | -0.87 | 0.07 | 0.39 | -0.90 | 0.06 | 0.36 | -0.86 | 0.08 | 0.37 |
| Lactobacillus                 | -0.52 | 0.21 | 0.45 | -0.32 | 0.44 | 0.64 | -0.34 | 0.45 | 0.70 | -0.34 | 0.45 | 0.69 | -0.42 | 0.36 | 0.62 |
| Lactococcus                   | 0.91  | 0.07 | 0.38 | 0.74  | 0.13 | 0.39 | 0.89  | 0.09 | 0.39 | 0.87  | 0.10 | 0.36 | 0.89  | 0.10 | 0.37 |
| Marvinbryantia                | 0.27  | 0.39 | 0.61 | 0.13  | 0.68 | 0.85 | 0.15  | 0.64 | 0.83 | 0.15  | 0.66 | 0.82 | 0.15  | 0.65 | 0.81 |
| Megasphaera                   | -0.22 | 0.36 | 0.59 | -0.09 | 0.70 | 0.86 | 0.05  | 0.85 | 0.91 | 0.05  | 0.84 | 0.91 | 0.04  | 0.90 | 0.93 |
| Monoglobus                    | 0.35  | 0.37 | 0.60 | 0.24  | 0.52 | 0.71 | 0.05  | 0.91 | 0.93 | 0.04  | 0.92 | 0.94 | 0.09  | 0.84 | 0.90 |
| Moryella                      | 0.99  | 0.06 | 0.36 | 0.83  | 0.10 | 0.35 | 0.60  | 0.27 | 0.51 | 0.59  | 0.29 | 0.54 | 0.58  | 0.30 | 0.56 |
| Negativibacillus              | -0.40 | 0.25 | 0.49 | -0.52 | 0.13 | 0.39 | -0.63 | 0.09 | 0.39 | -0.63 | 0.09 | 0.36 | -0.61 | 0.11 | 0.37 |
| NK4A214_group                 | -0.15 | 0.59 | 0.75 | -0.32 | 0.24 | 0.49 | -0.50 | 0.09 | 0.39 | -0.51 | 0.08 | 0.36 | -0.52 | 0.08 | 0.37 |
| Odoribacter                   | 0.54  | 0.04 | 0.32 | 0.52  | 0.04 | 0.29 | 0.43  | 0.13 | 0.42 | 0.43  | 0.13 | 0.41 | 0.47  | 0.10 | 0.37 |
| Oscillibacter                 | -0.03 | 0.95 | 0.98 | -0.13 | 0.77 | 0.88 | -0.19 | 0.70 | 0.85 | -0.21 | 0.67 | 0.82 | -0.22 | 0.66 | 0.81 |
| Oscillospira                  | -0.12 | 0.86 | 0.93 | -0.17 | 0.78 | 0.88 | -0.19 | 0.77 | 0.88 | -0.21 | 0.75 | 0.86 | -0.18 | 0.78 | 0.89 |
| Oxalobacter                   | 0.68  | 0.12 | 0.40 | 0.43  | 0.32 | 0.55 | 0.26  | 0.57 | 0.79 | 0.26  | 0.58 | 0.79 | 0.34  | 0.48 | 0.70 |
| Paludicola                    | -0.20 | 0.67 | 0.81 | -0.62 | 0.17 | 0.41 | -1.00 | 0.04 | 0.36 | -1.07 | 0.03 | 0.33 | -1.08 | 0.03 | 0.32 |
| Parabacteroides               | 0.45  | 0.16 | 0.40 | 0.58  | 0.06 | 0.29 | 0.65  | 0.05 | 0.36 | 0.65  | 0.05 | 0.36 | 0.67  | 0.04 | 0.34 |
| Paraprevotella                | 0.05  | 0.82 | 0.93 | 0.09  | 0.67 | 0.85 | 0.09  | 0.72 | 0.85 | 0.08  | 0.75 | 0.86 | 0.06  | 0.81 | 0.90 |
| Parasutterella                | 0.59  | 0.01 | 0.16 | 0.59  | 0.01 | 0.19 | 0.45  | 0.09 | 0.39 | 0.46  | 0.08 | 0.36 | 0.50  | 0.06 | 0.37 |
| Peptococcus                   | -0.62 | 0.15 | 0.40 | -0.84 | 0.04 | 0.29 | -0.95 | 0.03 | 0.36 | -0.98 | 0.03 | 0.33 | -0.99 | 0.03 | 0.32 |
| Phascolarctobacterium         | 0.28  | 0.22 | 0.45 | 0.28  | 0.20 | 0.44 | 0.33  | 0.17 | 0.43 | 0.32  | 0.18 | 0.44 | 0.37  | 0.14 | 0.40 |
| Phocea                        | -0.95 | 0.10 | 0.40 | -1.13 | 0.04 | 0.29 | -1.51 | 0.01 | 0.24 | -1.50 | 0.01 | 0.25 | -1.49 | 0.01 | 0.25 |
| Prevotella                    | 0.04  | 0.84 | 0.93 | 0.08  | 0.67 | 0.85 | 0.03  | 0.87 | 0.92 | 0.03  | 0.87 | 0.91 | 0.03  | 0.89 | 0.93 |
| Romboutsia                    | 0.53  | 0.14 | 0.40 | 0.61  | 0.08 | 0.29 | 0.49  | 0.19 | 0.46 | 0.49  | 0.19 | 0.46 | 0.46  | 0.23 | 0.49 |
| Roseburia                     | 1.31  | 0.00 | 0.10 | 1.10  | 0.01 | 0.20 | 0.75  | 0.14 | 0.42 | 0.75  | 0.13 | 0.41 | 0.75  | 0.14 | 0.40 |
| Ruminococcus                  | 0.47  | 0.10 | 0.40 | 0.38  | 0.16 | 0.40 | 0.26  | 0.39 | 0.63 | 0.26  | 0.40 | 0.64 | 0.25  | 0.42 | 0.67 |
| Sellimonas                    | 0.35  | 0.35 | 0.59 | 0.40  | 0.28 | 0.55 | 0.42  | 0.28 | 0.53 | 0.41  | 0.29 | 0.54 | 0.42  | 0.29 | 0.56 |
| Senegalimassilia              | 0.44  | 0.21 | 0.45 | 0.41  | 0.23 | 0.49 | 0.48  | 0.19 | 0.46 | 0.47  | 0.21 | 0.47 | 0.47  | 0.21 | 0.47 |
| Shuttleworthia                | -0.22 | 0.64 | 0.79 | -0.35 | 0.43 | 0.64 | -0.61 | 0.21 | 0.47 | -0.60 | 0.22 | 0.48 | -0.60 | 0.23 | 0.49 |
| Slackia                       | -0.01 | 0.97 | 0.99 | 0.04  | 0.89 | 0.93 | 0.04  | 0.91 | 0.93 | 0.03  | 0.94 | 0.94 | 0.04  | 0.91 | 0.93 |
| Streptococcus                 | 0.32  | 0.51 | 0.69 | 0.34  | 0.47 | 0.66 | 0.60  | 0.25 | 0.50 | 0.58  | 0.27 | 0.53 | 0.53  | 0.33 | 0.59 |
| Subdoligranulum               | 0.78  | 0.04 | 0.32 | 0.66  | 0.07 | 0.29 | 0.54  | 0.16 | 0.43 | 0.53  | 0.17 | 0.43 | 0.54  | 0.17 | 0.43 |
| Sutterella                    | 0.09  | 0.67 | 0.81 | 0.16  | 0.42 | 0.64 | 0.27  | 0.22 | 0.47 | 0.26  | 0.23 | 0.48 | 0.26  | 0.25 | 0.50 |
| TM7x                          | 0.05  | 0.92 | 0.96 | -0.07 | 0.88 | 0.93 | 0.12  | 0.82 | 0.90 | 0.11  | 0.83 | 0.91 | 0.10  | 0.84 | 0.90 |
| Turicibacter                  | 1.53  | 0.00 | 0.05 | 1.79  | 0.00 | 0.01 | 1.80  | 0.00 | 0.02 | 1.84  | 0.00 | 0.02 | 1.83  | 0.00 | 0.01 |
| Tuzzerella                    | 0.07  | 0.85 | 0.93 | 0.09  | 0.80 | 0.88 | 0.06  | 0.88 | 0.92 | 0.06  | 0.87 | 0.91 | 0.07  | 0.85 | 0.90 |
| UBA1819                       | -1.40 | 0.01 | 0.11 | -1.49 | 0.00 | 0.12 | -1.54 | 0.01 | 0.17 | -1.58 | 0.01 | 0.14 | -1.57 | 0.01 | 0.16 |
| UCG.002                       | -0.10 | 0.73 | 0.86 | -0.26 | 0.33 | 0.55 | -0.36 | 0.22 | 0.47 | -0.37 | 0.21 | 0.47 | -0.35 | 0.24 | 0.50 |
| UCG.003                       | 0.38  | 0.17 | 0.41 | 0.23  | 0.40 | 0.62 | 0.14  | 0.65 | 0.83 | 0.13  | 0.67 | 0.82 | 0.14  | 0.65 | 0.81 |
| UCG.005                       | 0.24  | 0.44 | 0.65 | 0.13  | 0.68 | 0.85 | -0.08 | 0.83 | 0.90 | -0.10 | 0.78 | 0.87 | -0.10 | 0.79 | 0.89 |
| UCG.009                       | -0.23 | 0.62 | 0.77 | -0.41 | 0.37 | 0.60 | -0.69 | 0.16 | 0.43 | -0.70 | 0.15 | 0.43 | -0.72 | 0.15 | 0.41 |
| Veillonella                   | 0.58  | 0.07 | 0.38 | 0.64  | 0.04 | 0.29 | 0.65  | 0.06 | 0.38 | 0.65  | 0.06 | 0.36 | 0.63  | 0.07 | 0.37 |
| Victivallis                   | 0.17  | 0.58 | 0.75 | 0.09  | 0.77 | 0.88 | -0.06 | 0.85 | 0.91 | -0.06 | 0.85 | 0.91 | -0.06 | 0.85 | 0.90 |

Multivariable-adjusted regression models adjusted for:

Model 1: sequencing batch, age, race, gender, study center

Model 2: Model 1, with education

Model 3: Model 2, with physical activity, diet score, medication use, and smoking

Model 4: Model 3 with BMI

Model 5: Model 4 with hypertension and diabetes

eTable 51: Multivariable-adjusted regression coefficients, p-values, and false discovery rate (FDR)-adjusted p-values for genera among male participants with respect to letter fluency.

|                               | Model1 |         |      | Model2 |         |      | Model3 |         |      | Model4 |         |      | Model5 |         |      |
|-------------------------------|--------|---------|------|--------|---------|------|--------|---------|------|--------|---------|------|--------|---------|------|
|                               | beta   | p-value | FDR  | beta   | p-value | FDR  | beta   | p-value | FDR  | beta   | p-value | FDR  | beta   | p-value | FDR  |
| Acetanaerobacterium           | 1.59   | 0.39    | 0.90 | 1.36   | 0.44    | 0.96 | 1.21   | 0.52    | 0.96 | 1.21   | 0.52    | 0.96 | 1.21   | 0.52    | 0.96 |
| Acidaminococcus               | -1.02  | 0.05    | 0.64 | -0.71  | 0.16    | 0.94 | -0.54  | 0.34    | 0.96 | -0.55  | 0.33    | 0.96 | -0.58  | 0.31    | 0.96 |
| Actinomyces                   | 1.15   | 0.45    | 0.90 | 1.22   | 0.40    | 0.94 | 0.95   | 0.54    | 0.96 | 1.01   | 0.53    | 0.96 | 0.94   | 0.56    | 0.96 |
| Adlercreutzia                 | -0.48  | 0.58    | 0.90 | -0.38  | 0.65    | 0.98 | -0.38  | 0.67    | 0.97 | -0.39  | 0.66    | 0.97 | -0.37  | 0.67    | 0.97 |
| Agathobacter                  | 0.77   | 0.56    | 0.90 | 0.26   | 0.83    | 0.98 | -0.32  | 0.81    | 1.00 | -0.37  | 0.78    | 0.99 | -0.34  | 0.80    | 1.00 |
| Akkermansia                   | -0.39  | 0.53    | 0.90 | -0.84  | 0.16    | 0.94 | -0.93  | 0.15    | 0.96 | -0.94  | 0.14    | 0.96 | -0.93  | 0.15    | 0.96 |
| Alistipes                     | 1.83   | 0.09    | 0.77 | 1.18   | 0.25    | 0.94 | 0.74   | 0.50    | 0.96 | 0.74   | 0.50    | 0.96 | 0.81   | 0.47    | 0.96 |
| Allisonella                   | -0.26  | 0.79    | 0.97 | 0.51   | 0.60    | 0.98 | 0.81   | 0.44    | 0.96 | 0.81   | 0.44    | 0.96 | 0.80   | 0.44    | 0.96 |
| Anaerofilum                   | 0.65   | 0.62    | 0.91 | 0.06   | 0.96    | 0.98 | 0.13   | 0.93    | 1.00 | 0.12   | 0.93    | 0.99 | 0.12   | 0.93    | 1.00 |
| Anaerostipes                  | 1.66   | 0.28    | 0.90 | 1.01   | 0.49    | 0.97 | 2.15   | 0.17    | 0.96 | 2.14   | 0.17    | 0.96 | 2.13   | 0.18    | 0.96 |
| Anaerotruncus                 | -0.76  | 0.53    | 0.90 | -1.29  | 0.27    | 0.94 | -0.54  | 0.66    | 0.97 | -0.52  | 0.68    | 0.97 | -0.52  | 0.68    | 0.97 |
| Bacteroides                   | 1.91   | 0.30    | 0.90 | 1.84   | 0.30    | 0.94 | 2.25   | 0.22    | 0.96 | 2.24   | 0.22    | 0.96 | 2.31   | 0.21    | 0.96 |
| Barnesiella                   | 1.11   | 0.05    | 0.64 | 1.17   | 0.03    | 0.94 | 0.73   | 0.20    | 0.96 | 0.73   | 0.20    | 0.96 | 0.73   | 0.20    | 0.96 |
| Bifidobacterium               | 0.03   | 0.97    | 0.99 | 0.38   | 0.58    | 0.98 | 0.19   | 0.79    | 1.00 | 0.18   | 0.80    | 0.99 | 0.16   | 0.82    | 1.00 |
| Bilophila                     | 0.99   | 0.22    | 0.90 | 0.49   | 0.53    | 0.98 | 0.81   | 0.33    | 0.96 | 0.81   | 0.34    | 0.96 | 0.84   | 0.32    | 0.96 |
| Blautia                       | 0.93   | 0.72    | 0.95 | -0.55  | 0.83    | 0.98 | 0.11   | 0.97    | 1.00 | 0.11   | 0.97    | 0.99 | 0.12   | 0.96    | 1.00 |
| Butyricoccus                  | 1.46   | 0.47    | 0.90 | -0.12  | 0.95    | 0.98 | -0.23  | 0.91    | 1.00 | -0.23  | 0.91    | 0.99 | -0.29  | 0.89    | 1.00 |
| Butyricimonas                 | 0.38   | 0.57    | 0.90 | 0.15   | 0.81    | 0.98 | 0.17   | 0.79    | 1.00 | 0.17   | 0.80    | 0.99 | 0.20   | 0.77    | 1.00 |
| CAG.56                        | 0.18   | 0.80    | 0.97 | -0.13  | 0.85    | 0.98 | -0.10  | 0.89    | 1.00 | -0.10  | 0.89    | 0.99 | -0.06  | 0.93    | 1.00 |
| Candidatus_Soleaferrea        | 0.56   | 0.69    | 0.94 | -0.16  | 0.91    | 0.98 | 0.01   | 1.00    | 1.00 | 0.01   | 0.99    | 0.99 | 0.00   | 1.00    | 1.00 |
| Caproiciproducens             | 1.45   | 0.27    | 0.90 | 1.20   | 0.34    | 0.94 | 1.48   | 0.27    | 0.96 | 1.48   | 0.27    | 0.96 | 1.46   | 0.29    | 0.96 |
| Catenibacterium               | -0.82  | 0.23    | 0.90 | -0.87  | 0.18    | 0.94 | -0.70  | 0.31    | 0.96 | -0.70  | 0.32    | 0.96 | -0.75  | 0.29    | 0.96 |
| Christensenellaceae_R.7_group | 0.33   | 0.60    | 0.90 | -0.03  | 0.96    | 0.98 | -0.38  | 0.56    | 0.96 | -0.38  | 0.56    | 0.96 | -0.38  | 0.56    | 0.96 |
| Clostridium_sensu_stricto_1   | 0.55   | 0.46    | 0.90 | 0.82   | 0.25    | 0.94 | 0.89   | 0.25    | 0.96 | 0.90   | 0.25    | 0.96 | 0.88   | 0.27    | 0.96 |
| Collidextribacter             | -0.25  | 0.87    | 0.98 | -1.09  | 0.45    | 0.96 | -1.16  | 0.44    | 0.96 | -1.17  | 0.44    | 0.96 | -1.25  | 0.42    | 0.96 |
| Collinsella                   | 0.56   | 0.44    | 0.90 | 0.79   | 0.26    | 0.94 | 0.96   | 0.20    | 0.96 | 0.97   | 0.20    | 0.96 | 0.97   | 0.20    | 0.96 |
| Coprobacter                   | 1.78   | 0.02    | 0.64 | 1.56   | 0.03    | 0.94 | 1.35   | 0.07    | 0.96 | 1.36   | 0.06    | 0.96 | 1.41   | 0.06    | 0.96 |
| Coprococcus                   | 2.10   | 0.02    | 0.64 | 1.47   | 0.09    | 0.94 | 1.56   | 0.09    | 0.96 | 1.59   | 0.08    | 0.96 | 1.61   | 0.08    | 0.96 |
| Defluviitaleaceae_UCG.011     | 0.54   | 0.66    | 0.93 | 0.52   | 0.66    | 0.98 | 0.90   | 0.47    | 0.96 | 0.90   | 0.47    | 0.96 | 0.90   | 0.48    | 0.96 |
| Desulfovibrio                 | -0.37  | 0.57    | 0.90 | -0.38  | 0.55    | 0.98 | -0.45  | 0.51    | 0.96 | -0.45  | 0.52    | 0.96 | -0.43  | 0.54    | 0.96 |
| Dialister                     | -0.16  | 0.76    | 0.95 | -0.14  | 0.77    | 0.98 | 0.08   | 0.88    | 1.00 | 0.08   | 0.89    | 0.99 | 0.03   | 0.95    | 1.00 |
| Dorea                         | 0.74   | 0.52    | 0.90 | 0.30   | 0.79    | 0.98 | 0.66   | 0.57    | 0.96 | 0.68   | 0.56    | 0.96 | 0.74   | 0.53    | 0.96 |
| DTU089                        | 1.48   | 0.18    | 0.90 | 1.42   | 0.18    | 0.94 | 1.32   | 0.24    | 0.96 | 1.38   | 0.22    | 0.96 | 1.38   | 0.22    | 0.96 |
| Eggerthella                   | 0.43   | 0.68    | 0.94 | 0.16   | 0.88    | 0.98 | 0.72   | 0.51    | 0.96 | 0.73   | 0.50    | 0.96 | 0.73   | 0.51    | 0.96 |
| Eisenbergiella                | -1.59  | 0.19    | 0.90 | -1.53  | 0.19    | 0.94 | -1.01  | 0.42    | 0.96 | -1.00  | 0.43    | 0.96 | -1.03  | 0.41    | 0.96 |
| Enterorhabdus                 | 0.67   | 0.51    | 0.90 | 0.29   | 0.76    | 0.98 | 0.76   | 0.47    | 0.96 | 0.77   | 0.47    | 0.96 | 0.76   | 0.48    | 0.96 |
| Erysipelatoclostridium        | -0.24  | 0.83    | 0.98 | 0.02   | 0.98    | 0.98 | -0.04  | 0.97    | 1.00 | -0.02  | 0.98    | 0.99 | -0.05  | 0.97    | 1.00 |
| Erysipelotrichaceae_UCG.003   | 0.52   | 0.52    | 0.90 | 0.38   | 0.63    | 0.98 | -0.02  | 0.98    | 1.00 | -0.02  | 0.98    | 0.99 | -0.02  | 0.98    | 1.00 |
| Escherichia.Shigella          | 0.14   | 0.86    | 0.98 | 0.66   | 0.39    | 0.94 | 0.87   | 0.29    | 0.96 | 0.86   | 0.30    | 0.96 | 0.88   | 0.29    | 0.96 |
| Faecalibacterium              | 0.72   | 0.57    | 0.90 | 0.88   | 0.47    | 0.96 | 0.40   | 0.77    | 1.00 | 0.41   | 0.76    | 0.99 | 0.40   | 0.77    | 1.00 |
| Family_XIII_AD3011_group      | 1.19   | 0.25    | 0.90 | 0.19   | 0.85    | 0.98 | 0.06   | 0.96    | 1.00 | 0.09   | 0.94    | 0.99 | 0.09   | 0.93    | 1.00 |
| Family_XIII_UCG.001           | 0.30   | 0.80    | 0.97 | -0.13  | 0.91    | 0.98 | -0.13  | 0.92    | 1.00 | -0.10  | 0.94    | 0.99 | -0.07  | 0.95    | 1.00 |
| FD2005                        | -2.05  | 0.05    | 0.64 | -1.89  | 0.06    | 0.94 | -2.11  | 0.05    | 0.96 | -2.17  | 0.05    | 0.96 | -2.19  | 0.05    | 0.96 |
| Flavonifractor                | 0.71   | 0.47    | 0.90 | 0.85   | 0.37    | 0.94 | 1.17   | 0.25    | 0.96 | 1.17   | 0.25    | 0.96 | 1.15   | 0.26    | 0.96 |
| Fournierella                  | 0.07   | 0.95    | 0.99 | -0.03  | 0.98    | 0.98 | -0.71  | 0.50    | 0.96 | -0.70  | 0.51    | 0.96 | -0.70  | 0.51    | 0.96 |
| Frisingicoccus                | -0.03  | 0.98    | 0.99 | 0.22   | 0.81    | 0.98 | 0.49   | 0.61    | 0.96 | 0.48   | 0.62    | 0.96 | 0.51   | 0.60    | 0.96 |
| Fusicatenibacter              | 0.02   | 0.98    | 0.99 | -0.17  | 0.85    | 0.98 | 0.06   | 0.95    | 1.00 | 0.05   | 0.96    | 0.99 | 0.05   | 0.96    | 1.00 |
| Fusobacterium                 | -0.07  | 0.95    | 0.99 | 0.50   | 0.66    | 0.98 | 0.64   | 0.59    | 0.96 | 0.67   | 0.58    | 0.96 | 0.76   | 0.54    | 0.96 |
| GCA.900066575                 | 1.21   | 0.27    | 0.90 | 0.76   | 0.48    | 0.96 | 0.55   | 0.62    | 0.96 | 0.57   | 0.61    | 0.96 | 0.57   | 0.62    | 0.96 |
| Gordonibacter                 | 0.65   | 0.60    | 0.90 | 0.28   | 0.81    | 0.98 | 0.64   | 0.61    | 0.96 | 0.67   | 0.60    | 0.96 | 0.68   | 0.59    | 0.96 |
| Granulicatella                | -1.57  | 0.33    | 0.90 | -1.02  | 0.51    | 0.98 | -0.92  | 0.59    | 0.96 | -0.91  | 0.59    | 0.96 | -0.98  | 0.57    | 0.96 |
| Haemophilus                   | 0.30   | 0.70    | 0.94 | 0.29   | 0.70    | 0.98 | -0.31  | 0.70    | 0.98 | -0.31  | 0.71    | 0.99 | -0.35  | 0.68    | 0.97 |
| Harryflintia                  | -0.44  | 0.74    | 0.95 | -1.00  | 0.43    | 0.96 | -0.76  | 0.58    | 0.96 | -0.76  | 0.58    | 0.96 | -0.72  | 0.61    | 0.96 |
| Holdemanella                  | 0.18   | 0.81    | 0.97 | 0.15   | 0.83    | 0.98 | 0.57   | 0.46    | 0.96 | 0.57   | 0.46    | 0.96 | 0.61   | 0.44    | 0.96 |

|                               |       |      |      |       |      |      |       |      |      |       |      |      |       |      |      |
|-------------------------------|-------|------|------|-------|------|------|-------|------|------|-------|------|------|-------|------|------|
| Holdemania                    | -2.55 | 0.23 | 0.90 | -2.29 | 0.26 | 0.94 | -1.41 | 0.52 | 0.96 | -1.38 | 0.53 | 0.96 | -1.36 | 0.54 | 0.96 |
| Howardella                    | -0.95 | 0.30 | 0.90 | -1.12 | 0.20 | 0.94 | -0.97 | 0.30 | 0.96 | -0.96 | 0.31 | 0.96 | -0.98 | 0.31 | 0.96 |
| Hungatella                    | -2.15 | 0.05 | 0.64 | -1.95 | 0.07 | 0.94 | -2.10 | 0.06 | 0.96 | -2.10 | 0.06 | 0.96 | -2.15 | 0.06 | 0.96 |
| Hydrogenoanaerobacterium      | 1.97  | 0.13 | 0.89 | 1.13  | 0.37 | 0.94 | 0.29  | 0.83 | 1.00 | 0.30  | 0.82 | 0.99 | 0.28  | 0.84 | 1.00 |
| Incertae_Sedis                | 2.81  | 0.13 | 0.89 | 2.95  | 0.10 | 0.94 | 3.39  | 0.08 | 0.96 | 3.38  | 0.08 | 0.96 | 3.41  | 0.08 | 0.96 |
| Intestinibacter               | 0.70  | 0.47 | 0.90 | 1.06  | 0.26 | 0.94 | 0.86  | 0.39 | 0.96 | 0.85  | 0.40 | 0.96 | 0.82  | 0.42 | 0.96 |
| Intestinimonas                | 0.78  | 0.42 | 0.90 | -0.19 | 0.85 | 0.98 | -0.41 | 0.69 | 0.98 | -0.41 | 0.69 | 0.97 | -0.38 | 0.71 | 0.99 |
| Lachnoclostridium             | -1.73 | 0.40 | 0.90 | -1.26 | 0.52 | 0.98 | 0.23  | 0.91 | 1.00 | 0.20  | 0.92 | 0.99 | 0.24  | 0.91 | 1.00 |
| Lachnospira                   | 1.74  | 0.09 | 0.77 | 0.93  | 0.36 | 0.94 | 0.23  | 0.83 | 1.00 | 0.21  | 0.85 | 0.99 | 0.20  | 0.85 | 1.00 |
| Lachnospiraceae_FCS020_group  | 0.51  | 0.60 | 0.90 | -0.04 | 0.97 | 0.98 | -0.18 | 0.86 | 1.00 | -0.17 | 0.87 | 0.99 | -0.18 | 0.87 | 1.00 |
| Lachnospiraceae_ND3007_group  | 1.17  | 0.09 | 0.77 | 0.78  | 0.24 | 0.94 | 0.69  | 0.34 | 0.96 | 0.68  | 0.34 | 0.96 | 0.70  | 0.34 | 0.96 |
| Lachnospiraceae_NK4A136_group | 0.70  | 0.48 | 0.90 | 0.03  | 0.98 | 0.98 | -0.71 | 0.48 | 0.96 | -0.70 | 0.49 | 0.96 | -0.70 | 0.49 | 0.96 |
| Lachnospiraceae_UCG.001       | -0.03 | 0.96 | 0.99 | -0.29 | 0.67 | 0.98 | -0.43 | 0.56 | 0.96 | -0.43 | 0.57 | 0.96 | -0.43 | 0.56 | 0.96 |
| Lachnospiraceae_UCG.004       | 0.12  | 0.90 | 0.99 | -0.40 | 0.64 | 0.98 | -0.63 | 0.49 | 0.96 | -0.63 | 0.49 | 0.96 | -0.66 | 0.47 | 0.96 |
| Lachnospiraceae_UCG.010       | -0.86 | 0.46 | 0.90 | -1.40 | 0.21 | 0.94 | -1.27 | 0.28 | 0.96 | -1.26 | 0.28 | 0.96 | -1.22 | 0.31 | 0.96 |
| Lactobacillus                 | -2.31 | 0.03 | 0.64 | -1.73 | 0.09 | 0.94 | -2.26 | 0.04 | 0.96 | -2.26 | 0.04 | 0.96 | -2.42 | 0.03 | 0.96 |
| Lactococcus                   | 2.00  | 0.11 | 0.87 | 1.52  | 0.21 | 0.94 | 1.63  | 0.20 | 0.96 | 1.66  | 0.20 | 0.96 | 1.69  | 0.19 | 0.96 |
| Marvinbryantia                | 0.66  | 0.40 | 0.90 | 0.25  | 0.74 | 0.98 | 0.15  | 0.85 | 1.00 | 0.16  | 0.85 | 0.99 | 0.16  | 0.84 | 1.00 |
| Megasphaera                   | -0.31 | 0.61 | 0.90 | 0.07  | 0.91 | 0.98 | 0.41  | 0.53 | 0.96 | 0.41  | 0.53 | 0.96 | 0.39  | 0.56 | 0.96 |
| Monoglobus                    | 1.14  | 0.24 | 0.90 | 0.82  | 0.38 | 0.94 | 0.55  | 0.59 | 0.96 | 0.56  | 0.58 | 0.96 | 0.65  | 0.53 | 0.96 |
| Moryella                      | 0.75  | 0.56 | 0.90 | 0.27  | 0.83 | 0.98 | -0.20 | 0.88 | 1.00 | -0.18 | 0.89 | 0.99 | -0.21 | 0.88 | 1.00 |
| Negativibacillus              | -1.22 | 0.16 | 0.90 | -1.59 | 0.06 | 0.94 | -1.94 | 0.03 | 0.96 | -1.94 | 0.03 | 0.96 | -1.94 | 0.03 | 0.96 |
| NK4A214_group                 | 0.41  | 0.55 | 0.90 | -0.07 | 0.92 | 0.98 | -0.32 | 0.65 | 0.97 | -0.31 | 0.66 | 0.97 | -0.33 | 0.64 | 0.96 |
| Odoribacter                   | 0.55  | 0.41 | 0.90 | 0.48  | 0.45 | 0.96 | -0.06 | 0.93 | 1.00 | -0.06 | 0.93 | 0.99 | -0.03 | 0.96 | 1.00 |
| Oscillibacter                 | 0.92  | 0.42 | 0.90 | 0.62  | 0.57 | 0.98 | 0.68  | 0.57 | 0.96 | 0.70  | 0.56 | 0.96 | 0.68  | 0.57 | 0.96 |
| Oscillospira                  | 3.26  | 0.04 | 0.64 | 3.09  | 0.04 | 0.94 | 2.97  | 0.06 | 0.96 | 3.00  | 0.06 | 0.96 | 3.02  | 0.06 | 0.96 |
| Oxalobacter                   | 2.65  | 0.02 | 0.64 | 1.88  | 0.08 | 0.94 | 1.67  | 0.14 | 0.96 | 1.67  | 0.14 | 0.96 | 1.79  | 0.12 | 0.96 |
| Paludicola                    | 1.94  | 0.09 | 0.77 | 0.80  | 0.48 | 0.96 | 0.83  | 0.50 | 0.96 | 0.90  | 0.47 | 0.96 | 0.89  | 0.48 | 0.96 |
| Parabacteroides               | 0.34  | 0.67 | 0.93 | 0.70  | 0.36 | 0.94 | 0.76  | 0.34 | 0.96 | 0.79  | 0.33 | 0.96 | 0.82  | 0.31 | 0.96 |
| Paraprevotella                | -0.36 | 0.51 | 0.90 | -0.24 | 0.65 | 0.98 | -0.42 | 0.47 | 0.96 | -0.41 | 0.48 | 0.96 | -0.43 | 0.47 | 0.96 |
| Parasutterella                | 0.60  | 0.33 | 0.90 | 0.59  | 0.31 | 0.94 | 0.51  | 0.42 | 0.96 | 0.51  | 0.43 | 0.96 | 0.55  | 0.40 | 0.96 |
| Peptococcus                   | -1.12 | 0.29 | 0.90 | -1.75 | 0.09 | 0.94 | -1.98 | 0.07 | 0.96 | -1.98 | 0.07 | 0.96 | -2.00 | 0.07 | 0.96 |
| Phascolarctobacterium         | 0.61  | 0.28 | 0.90 | 0.63  | 0.25 | 0.94 | 0.64  | 0.27 | 0.96 | 0.66  | 0.26 | 0.96 | 0.73  | 0.23 | 0.96 |
| Phoea                         | 0.07  | 0.96 | 0.99 | -0.43 | 0.76 | 0.98 | -0.96 | 0.52 | 0.96 | -0.96 | 0.52 | 0.96 | -0.92 | 0.53 | 0.96 |
| Prevotella                    | -0.58 | 0.22 | 0.90 | -0.46 | 0.32 | 0.94 | -0.52 | 0.28 | 0.96 | -0.52 | 0.29 | 0.96 | -0.52 | 0.29 | 0.96 |
| Romboutsia                    | 0.48  | 0.59 | 0.90 | 0.72  | 0.40 | 0.94 | 0.72  | 0.43 | 0.96 | 0.72  | 0.43 | 0.96 | 0.68  | 0.46 | 0.96 |
| Roseburia                     | 1.56  | 0.18 | 0.90 | 0.93  | 0.41 | 0.94 | 0.04  | 0.97 | 1.00 | 0.03  | 0.98 | 0.99 | 0.02  | 0.99 | 1.00 |
| Ruminococcus                  | -0.58 | 0.41 | 0.90 | -0.83 | 0.22 | 0.94 | -1.02 | 0.16 | 0.96 | -1.02 | 0.16 | 0.96 | -1.04 | 0.15 | 0.96 |
| Sellimonas                    | 0.34  | 0.72 | 0.95 | 0.48  | 0.60 | 0.98 | 0.07  | 0.94 | 1.00 | 0.08  | 0.93 | 0.99 | 0.09  | 0.92 | 1.00 |
| Senegalimassilia              | 0.09  | 0.91 | 0.99 | 0.03  | 0.98 | 0.98 | -0.04 | 0.97 | 1.00 | -0.02 | 0.98 | 0.99 | -0.02 | 0.99 | 1.00 |
| Shuttleworthia                | 0.53  | 0.65 | 0.93 | 0.14  | 0.90 | 0.98 | 0.26  | 0.82 | 1.00 | 0.26  | 0.83 | 0.99 | 0.28  | 0.81 | 1.00 |
| Slackia                       | -1.08 | 0.16 | 0.90 | -0.91 | 0.22 | 0.94 | -0.85 | 0.29 | 0.96 | -0.84 | 0.29 | 0.96 | -0.84 | 0.30 | 0.96 |
| Streptococcus                 | -0.13 | 0.92 | 0.99 | -0.08 | 0.94 | 0.98 | 0.00  | 1.00 | 1.00 | 0.04  | 0.98 | 0.99 | -0.05 | 0.97 | 1.00 |
| Subdoligranulum               | 0.18  | 0.85 | 0.98 | -0.16 | 0.85 | 0.98 | -0.44 | 0.64 | 0.97 | -0.43 | 0.65 | 0.97 | -0.44 | 0.64 | 0.96 |
| Sutterella                    | -0.11 | 0.84 | 0.98 | 0.11  | 0.83 | 0.98 | 0.21  | 0.69 | 0.98 | 0.22  | 0.68 | 0.97 | 0.22  | 0.69 | 0.97 |
| TM7x                          | -1.51 | 0.23 | 0.90 | -1.91 | 0.11 | 0.94 | -1.38 | 0.28 | 0.96 | -1.37 | 0.28 | 0.96 | -1.40 | 0.27 | 0.96 |
| Turicibacter                  | 1.10  | 0.34 | 0.90 | 1.79  | 0.11 | 0.94 | 1.76  | 0.13 | 0.96 | 1.76  | 0.14 | 0.96 | 1.73  | 0.15 | 0.96 |
| Tuzzerella                    | 0.13  | 0.88 | 0.98 | 0.20  | 0.81 | 0.98 | -0.32 | 0.73 | 1.00 | -0.33 | 0.73 | 0.99 | -0.32 | 0.73 | 1.00 |
| UBA1819                       | -0.02 | 0.99 | 0.99 | -0.32 | 0.81 | 0.98 | 0.30  | 0.83 | 1.00 | 0.33  | 0.82 | 0.99 | 0.32  | 0.82 | 1.00 |
| UCG.002                       | -0.22 | 0.75 | 0.95 | -0.71 | 0.29 | 0.94 | -1.05 | 0.14 | 0.96 | -1.04 | 0.15 | 0.96 | -1.04 | 0.15 | 0.96 |
| UCG.003                       | 0.61  | 0.39 | 0.90 | 0.17  | 0.80 | 0.98 | -0.14 | 0.85 | 1.00 | -0.13 | 0.85 | 0.99 | -0.13 | 0.87 | 1.00 |
| UCG.005                       | 0.99  | 0.21 | 0.90 | 0.66  | 0.39 | 0.94 | 0.52  | 0.54 | 0.96 | 0.55  | 0.52 | 0.96 | 0.55  | 0.52 | 0.96 |
| UCG.009                       | 0.39  | 0.74 | 0.95 | -0.13 | 0.91 | 0.98 | -0.54 | 0.65 | 0.97 | -0.54 | 0.66 | 0.97 | -0.59 | 0.63 | 0.96 |
| Veillonella                   | 0.45  | 0.57 | 0.90 | 0.64  | 0.41 | 0.94 | 0.12  | 0.89 | 1.00 | 0.12  | 0.89 | 0.99 | 0.09  | 0.91 | 1.00 |
| Victivallis                   | 0.12  | 0.87 | 0.98 | -0.12 | 0.87 | 0.98 | -0.41 | 0.60 | 0.96 | -0.41 | 0.60 | 0.96 | -0.42 | 0.60 | 0.96 |

Multivariable-adjusted regression models adjusted for:

Model 1: sequencing batch, age, race, gender, study center

Model 2: Model 1, with education

Model 3: Model 2, with physical activity, diet score, medication use, and smoking

Model 4: Model 3 with BMI

Model 5: Model 4 with hypertension and diabetes

eTable 52: Multivariable-adjusted regression coefficients, p-values, and false discovery rate (FDR)-adjusted p-values for genera among male participants with respect to MOCA.

|                               | Model1 |         |      | Model2 |         |      | Model3 |         |      | Model4 |         |      | Model5 |         |      |
|-------------------------------|--------|---------|------|--------|---------|------|--------|---------|------|--------|---------|------|--------|---------|------|
|                               | beta   | p-value | FDR  | beta   | p-value | FDR  | beta   | p-value | FDR  | beta   | p-value | FDR  | beta   | p-value | FDR  |
| Acetanaerobacterium           | -0.48  | 0.33    | 0.64 | -0.54  | 0.24    | 0.63 | -0.85  | 0.07    | 0.37 | -0.85  | 0.07    | 0.36 | -0.84  | 0.07    | 0.40 |
| Acidaminococcus               | -0.27  | 0.06    | 0.29 | -0.17  | 0.22    | 0.62 | -0.24  | 0.09    | 0.43 | -0.26  | 0.08    | 0.36 | -0.28  | 0.06    | 0.35 |
| Actinomyces                   | -0.25  | 0.54    | 0.83 | -0.22  | 0.57    | 0.85 | -0.24  | 0.56    | 0.86 | -0.19  | 0.64    | 0.88 | -0.25  | 0.54    | 0.83 |
| Adlercreutzia                 | 0.00   | 0.99    | 1.00 | 0.04   | 0.87    | 0.97 | -0.03  | 0.90    | 1.00 | -0.04  | 0.87    | 0.99 | -0.02  | 0.93    | 1.00 |
| Agathobacter                  | -0.11  | 0.75    | 0.90 | -0.28  | 0.38    | 0.72 | -0.23  | 0.47    | 0.83 | -0.28  | 0.38    | 0.75 | -0.28  | 0.38    | 0.77 |
| Akkermansia                   | 0.06   | 0.73    | 0.89 | -0.09  | 0.57    | 0.85 | -0.17  | 0.29    | 0.71 | -0.18  | 0.27    | 0.68 | -0.18  | 0.29    | 0.67 |
| Alistipes                     | 0.37   | 0.20    | 0.51 | 0.16   | 0.56    | 0.85 | -0.03  | 0.90    | 1.00 | -0.04  | 0.88    | 0.99 | -0.01  | 0.98    | 1.00 |
| Allisonella                   | 0.12   | 0.65    | 0.89 | 0.38   | 0.14    | 0.54 | 0.29   | 0.28    | 0.71 | 0.29   | 0.29    | 0.69 | 0.27   | 0.31    | 0.67 |
| Anaerofilum                   | -0.16  | 0.66    | 0.89 | -0.36  | 0.29    | 0.63 | -0.44  | 0.20    | 0.56 | -0.45  | 0.20    | 0.57 | -0.46  | 0.19    | 0.58 |
| Anaerostipes                  | 0.40   | 0.31    | 0.64 | 0.18   | 0.63    | 0.86 | 0.31   | 0.42    | 0.79 | 0.29   | 0.45    | 0.81 | 0.24   | 0.53    | 0.83 |
| Anaerotruncus                 | -0.32  | 0.32    | 0.64 | -0.49  | 0.11    | 0.46 | -0.41  | 0.19    | 0.56 | -0.38  | 0.23    | 0.59 | -0.38  | 0.23    | 0.58 |
| Bacteroides                   | -0.04  | 0.93    | 1.00 | -0.07  | 0.89    | 0.97 | -0.01  | 0.99    | 1.00 | -0.05  | 0.92    | 0.99 | 0.01   | 0.99    | 1.00 |
| Barnesiella                   | 0.18   | 0.23    | 0.55 | 0.20   | 0.16    | 0.54 | 0.19   | 0.19    | 0.56 | 0.19   | 0.18    | 0.57 | 0.20   | 0.18    | 0.58 |
| Bifidobacterium               | -0.11  | 0.57    | 0.85 | 0.01   | 0.96    | 0.99 | 0.00   | 0.98    | 1.00 | -0.01  | 0.96    | 0.99 | -0.02  | 0.90    | 1.00 |
| Bilophila                     | 0.05   | 0.81    | 0.96 | -0.11  | 0.58    | 0.85 | -0.31  | 0.14    | 0.52 | -0.35  | 0.11    | 0.45 | -0.32  | 0.14    | 0.54 |
| Blautia                       | -0.28  | 0.69    | 0.89 | -0.78  | 0.24    | 0.63 | -0.61  | 0.37    | 0.79 | -0.60  | 0.38    | 0.75 | -0.58  | 0.39    | 0.77 |
| Butyricoccus                  | 0.56   | 0.30    | 0.63 | 0.03   | 0.95    | 0.99 | -0.05  | 0.93    | 1.00 | -0.04  | 0.94    | 0.99 | -0.12  | 0.82    | 1.00 |
| Butyricimonas                 | -0.09  | 0.61    | 0.87 | -0.17  | 0.31    | 0.67 | -0.15  | 0.40    | 0.79 | -0.15  | 0.39    | 0.76 | -0.13  | 0.47    | 0.81 |
| CAG.56                        | 0.30   | 0.12    | 0.39 | 0.20   | 0.28    | 0.63 | 0.16   | 0.39    | 0.79 | 0.16   | 0.38    | 0.75 | 0.19   | 0.31    | 0.67 |
| Candidatus_Soleaferrea        | -0.72  | 0.06    | 0.29 | -0.97  | 0.01    | 0.16 | -1.11  | 0.00    | 0.12 | -1.10  | 0.00    | 0.11 | -1.12  | 0.00    | 0.19 |
| Caproiciproducens             | -0.58  | 0.11    | 0.39 | -0.66  | 0.05    | 0.33 | -0.73  | 0.04    | 0.30 | -0.73  | 0.03    | 0.29 | -0.79  | 0.02    | 0.26 |
| Catenibacterium               | -0.08  | 0.66    | 0.89 | -0.10  | 0.56    | 0.85 | -0.02  | 0.93    | 1.00 | -0.01  | 0.95    | 0.99 | -0.05  | 0.79    | 1.00 |
| Christensenellaceae_R.7_group | 0.26   | 0.13    | 0.41 | 0.14   | 0.39    | 0.73 | 0.11   | 0.51    | 0.83 | 0.12   | 0.47    | 0.81 | 0.12   | 0.49    | 0.83 |
| Clostridium_sensu_stricto_1   | 0.12   | 0.57    | 0.85 | 0.20   | 0.29    | 0.63 | 0.36   | 0.07    | 0.37 | 0.36   | 0.07    | 0.36 | 0.33   | 0.10    | 0.44 |
| Collidextribacter             | -0.15  | 0.71    | 0.89 | -0.42  | 0.27    | 0.63 | -0.36  | 0.36    | 0.79 | -0.36  | 0.35    | 0.75 | -0.42  | 0.28    | 0.67 |
| Collinsella                   | 0.00   | 0.99    | 1.00 | 0.07   | 0.70    | 0.87 | 0.00   | 0.98    | 1.00 | 0.00   | 0.99    | 0.99 | -0.01  | 0.97    | 1.00 |
| Coprobacter                   | 0.14   | 0.47    | 0.76 | 0.07   | 0.70    | 0.87 | -0.02  | 0.93    | 1.00 | -0.01  | 0.97    | 0.99 | 0.02   | 0.90    | 1.00 |
| Coprococcus                   | 0.61   | 0.01    | 0.21 | 0.40   | 0.08    | 0.43 | 0.47   | 0.04    | 0.32 | 0.50   | 0.04    | 0.29 | 0.49   | 0.04    | 0.33 |
| Defluviitaleaceae_UCG.011     | 0.00   | 1.00    | 1.00 | 0.00   | 1.00    | 1.00 | -0.05  | 0.88    | 1.00 | -0.04  | 0.89    | 0.99 | -0.05  | 0.89    | 1.00 |
| Desulfovibrio                 | -0.16  | 0.38    | 0.66 | -0.16  | 0.34    | 0.68 | -0.13  | 0.44    | 0.81 | -0.11  | 0.55    | 0.86 | -0.09  | 0.62    | 0.89 |
| Dialister                     | 0.06   | 0.69    | 0.89 | 0.06   | 0.64    | 0.86 | 0.06   | 0.68    | 0.91 | 0.05   | 0.72    | 0.94 | 0.01   | 0.93    | 1.00 |
| Dorea                         | 0.25   | 0.42    | 0.71 | 0.09   | 0.74    | 0.87 | 0.15   | 0.60    | 0.89 | 0.17   | 0.57    | 0.86 | 0.18   | 0.53    | 0.83 |
| DTU089                        | -0.04  | 0.89    | 1.00 | -0.06  | 0.84    | 0.94 | -0.15  | 0.60    | 0.89 | -0.11  | 0.69    | 0.92 | -0.12  | 0.69    | 0.92 |
| Eggerthella                   | -0.28  | 0.32    | 0.64 | -0.37  | 0.16    | 0.54 | -0.24  | 0.40    | 0.79 | -0.22  | 0.42    | 0.78 | -0.22  | 0.42    | 0.81 |
| Eisenbergiella                | -0.59  | 0.07    | 0.33 | -0.56  | 0.07    | 0.38 | -0.67  | 0.03    | 0.30 | -0.65  | 0.04    | 0.31 | -0.65  | 0.04    | 0.33 |
| Enterorhabdus                 | -0.18  | 0.50    | 0.79 | -0.31  | 0.22    | 0.62 | -0.25  | 0.36    | 0.79 | -0.24  | 0.38    | 0.75 | -0.28  | 0.32    | 0.67 |
| Erysipelatoclostridium        | -0.40  | 0.20    | 0.51 | -0.31  | 0.29    | 0.63 | -0.21  | 0.49    | 0.83 | -0.18  | 0.55    | 0.86 | -0.19  | 0.52    | 0.83 |
| Erysipelotrichaceae_UCG.003   | 0.17   | 0.44    | 0.72 | 0.12   | 0.57    | 0.85 | 0.01   | 0.98    | 1.00 | 0.00   | 0.99    | 0.99 | -0.01  | 0.96    | 1.00 |
| Escherichia.Shigella          | -0.24  | 0.26    | 0.57 | -0.07  | 0.73    | 0.87 | -0.22  | 0.30    | 0.71 | -0.24  | 0.27    | 0.68 | -0.22  | 0.31    | 0.67 |
| Faecalibacterium              | 0.49   | 0.14    | 0.42 | 0.53   | 0.09    | 0.44 | 0.71   | 0.03    | 0.30 | 0.72   | 0.03    | 0.29 | 0.68   | 0.04    | 0.35 |
| Family_XIII_AD3011_group      | 0.50   | 0.07    | 0.33 | 0.18   | 0.50    | 0.83 | 0.18   | 0.53    | 0.83 | 0.22   | 0.44    | 0.79 | 0.22   | 0.44    | 0.81 |
| Family_XIII_UCG.001           | 0.13   | 0.68    | 0.89 | -0.02  | 0.96    | 0.99 | 0.00   | 1.00    | 1.00 | 0.05   | 0.89    | 0.99 | 0.05   | 0.89    | 1.00 |
| FD2005                        | -0.26  | 0.36    | 0.66 | -0.21  | 0.44    | 0.76 | -0.15  | 0.58    | 0.88 | -0.19  | 0.50    | 0.82 | -0.21  | 0.45    | 0.81 |
| Flavonifractor                | -0.42  | 0.11    | 0.39 | -0.38  | 0.13    | 0.53 | -0.34  | 0.20    | 0.56 | -0.34  | 0.19    | 0.57 | -0.37  | 0.16    | 0.57 |
| Fournierella                  | 0.32   | 0.25    | 0.57 | 0.28   | 0.27    | 0.63 | 0.33   | 0.23    | 0.60 | 0.35   | 0.20    | 0.57 | 0.34   | 0.21    | 0.58 |
| Frisingicoccus                | -0.01  | 0.96    | 1.00 | 0.07   | 0.75    | 0.87 | -0.03  | 0.92    | 1.00 | -0.04  | 0.88    | 0.99 | 0.00   | 1.00    | 1.00 |
| Fusicatenibacter              | 0.00   | 0.99    | 1.00 | -0.06  | 0.79    | 0.90 | -0.11  | 0.66    | 0.91 | -0.12  | 0.62    | 0.88 | -0.12  | 0.61    | 0.89 |
| Fusobacterium                 | 0.07   | 0.84    | 0.98 | 0.26   | 0.40    | 0.73 | 0.29   | 0.35    | 0.78 | 0.32   | 0.30    | 0.69 | 0.40   | 0.21    | 0.58 |
| GCA.900066575                 | 0.42   | 0.16    | 0.43 | 0.26   | 0.35    | 0.68 | 0.19   | 0.50    | 0.83 | 0.21   | 0.46    | 0.81 | 0.18   | 0.54    | 0.83 |
| Gordonibacter                 | -0.62  | 0.06    | 0.29 | -0.73  | 0.02    | 0.17 | -0.58  | 0.06    | 0.37 | -0.56  | 0.07    | 0.36 | -0.55  | 0.08    | 0.41 |
| Granulicatella                | -0.53  | 0.22    | 0.53 | -0.34  | 0.40    | 0.73 | -0.54  | 0.21    | 0.56 | -0.53  | 0.22    | 0.58 | -0.54  | 0.21    | 0.58 |
| Haemophilus                   | 0.48   | 0.02    | 0.22 | 0.48   | 0.01    | 0.17 | 0.41   | 0.05    | 0.36 | 0.42   | 0.05    | 0.33 | 0.38   | 0.07    | 0.40 |
| Harryflintia                  | -0.71  | 0.04    | 0.29 | -0.88  | 0.01    | 0.16 | -1.00  | 0.00    | 0.12 | -1.00  | 0.00    | 0.11 | -0.96  | 0.01    | 0.19 |
| Holdemanella                  | 0.29   | 0.16    | 0.43 | 0.28   | 0.15    | 0.54 | 0.37   | 0.07    | 0.37 | 0.37   | 0.07    | 0.36 | 0.39   | 0.05    | 0.35 |



|                               |       |      |      |       |      |      |       |      |      |       |      |      |       |      |      |
|-------------------------------|-------|------|------|-------|------|------|-------|------|------|-------|------|------|-------|------|------|
| Holdemania                    | -1.56 | 0.01 | 0.21 | -1.46 | 0.01 | 0.16 | -1.40 | 0.01 | 0.19 | -1.36 | 0.01 | 0.20 | -1.32 | 0.02 | 0.20 |
| Howardella                    | -0.03 | 0.90 | 1.00 | -0.09 | 0.70 | 0.87 | -0.01 | 0.96 | 1.00 | 0.01  | 0.97 | 0.99 | 0.00  | 0.99 | 1.00 |
| Hungatella                    | -0.80 | 0.01 | 0.21 | -0.74 | 0.01 | 0.16 | -0.70 | 0.02 | 0.20 | -0.68 | 0.02 | 0.23 | -0.72 | 0.01 | 0.19 |
| Hydrogenoanaerobacterium      | 0.51  | 0.15 | 0.43 | 0.23  | 0.50 | 0.83 | 0.07  | 0.84 | 1.00 | 0.09  | 0.80 | 0.99 | 0.05  | 0.89 | 1.00 |
| Incertae_Sedis                | -0.99 | 0.05 | 0.29 | -0.93 | 0.05 | 0.33 | -0.86 | 0.08 | 0.39 | -0.87 | 0.08 | 0.36 | -0.83 | 0.09 | 0.43 |
| Intestinibacter               | 0.61  | 0.02 | 0.22 | 0.73  | 0.00 | 0.16 | 0.77  | 0.00 | 0.12 | 0.75  | 0.00 | 0.11 | 0.71  | 0.01 | 0.19 |
| Intestinimonas                | 0.00  | 0.99 | 1.00 | -0.33 | 0.20 | 0.61 | -0.52 | 0.04 | 0.32 | -0.53 | 0.04 | 0.31 | -0.51 | 0.05 | 0.35 |
| Lachnoclostridium             | -1.47 | 0.01 | 0.21 | -1.33 | 0.01 | 0.16 | -1.31 | 0.01 | 0.20 | -1.35 | 0.01 | 0.20 | -1.33 | 0.01 | 0.19 |
| Lachnospira                   | 1.00  | 0.00 | 0.03 | 0.74  | 0.01 | 0.16 | 0.43  | 0.12 | 0.48 | 0.41  | 0.14 | 0.53 | 0.39  | 0.16 | 0.57 |
| Lachnospiraceae_FCS020_group  | 0.53  | 0.05 | 0.29 | 0.35  | 0.16 | 0.54 | 0.42  | 0.11 | 0.47 | 0.43  | 0.11 | 0.45 | 0.42  | 0.12 | 0.48 |
| Lachnospiraceae_ND3007_group  | 0.42  | 0.02 | 0.22 | 0.29  | 0.10 | 0.44 | 0.34  | 0.06 | 0.37 | 0.34  | 0.06 | 0.36 | 0.34  | 0.07 | 0.40 |
| Lachnospiraceae_NK4A136_group | 0.46  | 0.08 | 0.33 | 0.24  | 0.33 | 0.68 | 0.11  | 0.67 | 0.91 | 0.12  | 0.64 | 0.88 | 0.12  | 0.65 | 0.90 |
| Lachnospiraceae_UCG.001       | 0.23  | 0.23 | 0.56 | 0.14  | 0.43 | 0.75 | 0.08  | 0.69 | 0.92 | 0.08  | 0.68 | 0.92 | 0.07  | 0.73 | 0.96 |
| Lachnospiraceae_UCG.004       | 0.45  | 0.06 | 0.29 | 0.28  | 0.21 | 0.62 | 0.31  | 0.18 | 0.56 | 0.30  | 0.19 | 0.57 | 0.29  | 0.22 | 0.58 |
| Lachnospiraceae_UCG.010       | 0.05  | 0.87 | 1.00 | -0.13 | 0.67 | 0.87 | -0.09 | 0.77 | 0.99 | -0.06 | 0.85 | 0.99 | 0.00  | 1.00 | 1.00 |
| Lactobacillus                 | -0.49 | 0.08 | 0.33 | -0.29 | 0.28 | 0.63 | -0.40 | 0.15 | 0.52 | -0.40 | 0.15 | 0.53 | -0.46 | 0.11 | 0.44 |
| Lactococcus                   | 0.28  | 0.42 | 0.71 | 0.11  | 0.73 | 0.87 | 0.21  | 0.53 | 0.83 | 0.24  | 0.47 | 0.81 | 0.26  | 0.43 | 0.81 |
| Marvinbryantia                | 0.20  | 0.34 | 0.64 | 0.06  | 0.75 | 0.87 | 0.27  | 0.19 | 0.56 | 0.28  | 0.17 | 0.56 | 0.28  | 0.18 | 0.58 |
| Megasphaera                   | -0.42 | 0.01 | 0.21 | -0.30 | 0.05 | 0.33 | -0.26 | 0.12 | 0.48 | -0.26 | 0.12 | 0.47 | -0.28 | 0.10 | 0.44 |
| Monoglobus                    | 0.44  | 0.09 | 0.35 | 0.34  | 0.17 | 0.55 | 0.23  | 0.38 | 0.79 | 0.24  | 0.36 | 0.75 | 0.33  | 0.22 | 0.58 |
| Moryella                      | 0.70  | 0.04 | 0.29 | 0.54  | 0.10 | 0.44 | 0.47  | 0.17 | 0.56 | 0.50  | 0.15 | 0.53 | 0.47  | 0.17 | 0.58 |
| Negativibacillus              | -0.42 | 0.08 | 0.33 | -0.54 | 0.02 | 0.17 | -0.66 | 0.00 | 0.12 | -0.67 | 0.00 | 0.11 | -0.66 | 0.00 | 0.19 |
| NK4A214_group                 | 0.21  | 0.26 | 0.57 | 0.05  | 0.76 | 0.87 | -0.03 | 0.88 | 1.00 | -0.02 | 0.92 | 0.99 | -0.04 | 0.83 | 1.00 |
| Odoribacter                   | 0.08  | 0.66 | 0.89 | 0.06  | 0.72 | 0.87 | 0.02  | 0.92 | 1.00 | 0.01  | 0.94 | 0.99 | 0.04  | 0.82 | 1.00 |
| Oscillibacter                 | -0.18 | 0.57 | 0.85 | -0.27 | 0.35 | 0.68 | -0.33 | 0.29 | 0.71 | -0.31 | 0.32 | 0.73 | -0.33 | 0.28 | 0.67 |
| Oscillospira                  | 0.04  | 0.93 | 1.00 | -0.01 | 0.98 | 0.99 | -0.09 | 0.83 | 1.00 | -0.06 | 0.88 | 0.99 | -0.05 | 0.91 | 1.00 |
| Oxalobacter                   | 0.13  | 0.66 | 0.89 | -0.13 | 0.64 | 0.86 | -0.07 | 0.82 | 1.00 | -0.06 | 0.84 | 0.99 | 0.01  | 0.98 | 1.00 |
| Paludicola                    | 0.47  | 0.12 | 0.39 | 0.10  | 0.74 | 0.87 | -0.01 | 0.96 | 1.00 | 0.04  | 0.90 | 0.99 | 0.02  | 0.96 | 1.00 |
| Parabacteroides               | -0.02 | 0.91 | 1.00 | 0.10  | 0.64 | 0.86 | 0.09  | 0.67 | 0.91 | 0.11  | 0.58 | 0.86 | 0.14  | 0.51 | 0.83 |
| Paraprevotella                | -0.14 | 0.36 | 0.66 | -0.10 | 0.49 | 0.83 | -0.10 | 0.51 | 0.83 | -0.08 | 0.58 | 0.86 | -0.09 | 0.56 | 0.84 |
| Parasutterella                | 0.35  | 0.03 | 0.29 | 0.35  | 0.02 | 0.22 | 0.27  | 0.10 | 0.44 | 0.26  | 0.11 | 0.45 | 0.29  | 0.08 | 0.40 |
| Peptococcus                   | 0.04  | 0.89 | 1.00 | -0.16 | 0.55 | 0.85 | -0.16 | 0.56 | 0.86 | -0.14 | 0.63 | 0.88 | -0.16 | 0.58 | 0.86 |
| Phascolarctobacterium         | 0.05  | 0.72 | 0.89 | 0.06  | 0.69 | 0.87 | 0.07  | 0.62 | 0.90 | 0.09  | 0.55 | 0.86 | 0.12  | 0.44 | 0.81 |
| Phocea                        | -0.35 | 0.37 | 0.66 | -0.53 | 0.16 | 0.54 | -0.81 | 0.03 | 0.30 | -0.82 | 0.03 | 0.29 | -0.79 | 0.04 | 0.33 |
| Prevotella                    | -0.13 | 0.30 | 0.63 | -0.10 | 0.43 | 0.75 | -0.10 | 0.42 | 0.79 | -0.10 | 0.41 | 0.78 | -0.11 | 0.40 | 0.77 |
| Romboutsia                    | -0.08 | 0.73 | 0.89 | 0.00  | 0.98 | 0.99 | 0.05  | 0.82 | 1.00 | 0.05  | 0.83 | 0.99 | 0.00  | 0.99 | 1.00 |
| Roseburia                     | 0.77  | 0.01 | 0.21 | 0.56  | 0.06 | 0.34 | 0.22  | 0.48 | 0.83 | 0.21  | 0.50 | 0.82 | 0.19  | 0.55 | 0.84 |
| Ruminococcus                  | 0.25  | 0.18 | 0.49 | 0.17  | 0.35 | 0.68 | 0.08  | 0.66 | 0.91 | 0.09  | 0.64 | 0.88 | 0.07  | 0.72 | 0.96 |
| Sellimonas                    | 0.43  | 0.09 | 0.35 | 0.47  | 0.05 | 0.33 | 0.58  | 0.02 | 0.20 | 0.60  | 0.01 | 0.20 | 0.61  | 0.01 | 0.19 |
| Senegalimassilia              | -0.09 | 0.69 | 0.89 | -0.12 | 0.59 | 0.86 | -0.04 | 0.86 | 1.00 | -0.02 | 0.92 | 0.99 | -0.02 | 0.94 | 1.00 |
| Shuttleworthia                | 0.11  | 0.73 | 0.89 | -0.02 | 0.93 | 0.99 | -0.23 | 0.45 | 0.81 | -0.25 | 0.42 | 0.78 | -0.22 | 0.47 | 0.81 |
| Slackia                       | -0.03 | 0.90 | 1.00 | 0.03  | 0.90 | 0.98 | 0.08  | 0.70 | 0.92 | 0.10  | 0.63 | 0.88 | 0.10  | 0.63 | 0.89 |
| Streptococcus                 | 0.31  | 0.34 | 0.64 | 0.33  | 0.28 | 0.63 | 0.34  | 0.30 | 0.71 | 0.41  | 0.22 | 0.58 | 0.35  | 0.29 | 0.67 |
| Subdoligranulum               | 0.37  | 0.14 | 0.42 | 0.26  | 0.27 | 0.63 | 0.24  | 0.33 | 0.76 | 0.25  | 0.30 | 0.69 | 0.24  | 0.32 | 0.68 |
| Sutterella                    | -0.33 | 0.02 | 0.22 | -0.26 | 0.05 | 0.33 | -0.18 | 0.19 | 0.56 | -0.17 | 0.21 | 0.58 | -0.17 | 0.21 | 0.58 |
| TM7x                          | 0.01  | 0.98 | 1.00 | -0.11 | 0.73 | 0.87 | 0.04  | 0.90 | 1.00 | 0.06  | 0.85 | 0.99 | 0.05  | 0.88 | 1.00 |
| Turicibacter                  | 0.27  | 0.39 | 0.68 | 0.50  | 0.09 | 0.44 | 0.44  | 0.14 | 0.52 | 0.42  | 0.17 | 0.56 | 0.38  | 0.22 | 0.58 |
| Tuzzerella                    | -0.13 | 0.59 | 0.86 | -0.11 | 0.64 | 0.86 | -0.15 | 0.52 | 0.83 | -0.16 | 0.50 | 0.82 | -0.16 | 0.50 | 0.83 |
| UBA1819                       | -0.73 | 0.04 | 0.29 | -0.82 | 0.02 | 0.17 | -0.91 | 0.01 | 0.19 | -0.89 | 0.01 | 0.20 | -0.88 | 0.01 | 0.19 |
| UCG.002                       | 0.14  | 0.44 | 0.72 | -0.01 | 0.93 | 0.99 | 0.02  | 0.90 | 1.00 | 0.04  | 0.84 | 0.99 | 0.05  | 0.77 | 1.00 |
| UCG.003                       | 0.37  | 0.05 | 0.29 | 0.22  | 0.22 | 0.62 | 0.15  | 0.41 | 0.79 | 0.16  | 0.38 | 0.75 | 0.16  | 0.39 | 0.77 |
| UCG.005                       | 0.24  | 0.28 | 0.60 | 0.12  | 0.55 | 0.85 | 0.09  | 0.68 | 0.91 | 0.12  | 0.58 | 0.86 | 0.11  | 0.63 | 0.89 |
| UCG.009                       | 0.20  | 0.53 | 0.82 | 0.04  | 0.91 | 0.98 | -0.02 | 0.94 | 1.00 | -0.01 | 0.98 | 0.99 | -0.05 | 0.87 | 1.00 |
| Veillonella                   | 0.34  | 0.11 | 0.39 | 0.40  | 0.05 | 0.33 | 0.36  | 0.09 | 0.43 | 0.36  | 0.09 | 0.42 | 0.33  | 0.12 | 0.49 |
| Victivallis                   | -0.02 | 0.93 | 1.00 | -0.10 | 0.61 | 0.86 | -0.08 | 0.71 | 0.92 | -0.08 | 0.70 | 0.92 | -0.08 | 0.68 | 0.92 |

Multivariable-adjusted regression models adjusted for:

Model 1: sequencing batch, age, race, gender, study center

Model 2: Model 1, with education

Model 3: Model 2, with physical activity, diet score, medication use, and smoking

Model 4: Model 3 with BMI

Model 5: Model 4 with hypertension and diabetes

eTable 53: Multivariable-adjusted regression coefficients, p-values, and false discovery rate (FDR)-adjusted p-values for genera among male participants with respect to PC (1st).

|                               | Model1 |         |      | Model2 |         |      | Model3 |         |      | Model4 |         |      | Model5 |         |      |
|-------------------------------|--------|---------|------|--------|---------|------|--------|---------|------|--------|---------|------|--------|---------|------|
|                               | beta   | p-value | FDR  | beta   | p-value | FDR  | beta   | p-value | FDR  | beta   | p-value | FDR  | beta   | p-value | FDR  |
| Acetanaerobacterium           | -0.03  | 0.89    | 0.93 | -0.06  | 0.76    | 0.87 | -0.16  | 0.44    | 0.97 | -0.16  | 0.43    | 0.97 | -0.14  | 0.49    | 0.99 |
| Acidaminococcus               | -0.12  | 0.07    | 0.39 | -0.06  | 0.32    | 0.75 | -0.05  | 0.44    | 0.97 | -0.06  | 0.38    | 0.95 | -0.07  | 0.30    | 0.87 |
| Actinomyces                   | -0.05  | 0.80    | 0.86 | -0.03  | 0.86    | 0.89 | -0.02  | 0.92    | 0.97 | 0.04   | 0.81    | 0.97 | 0.00   | 0.99    | 0.99 |
| Adlercreutzia                 | -0.05  | 0.67    | 0.84 | -0.02  | 0.80    | 0.87 | -0.03  | 0.75    | 0.97 | -0.04  | 0.72    | 0.97 | -0.03  | 0.79    | 0.99 |
| Agathobacter                  | 0.16   | 0.30    | 0.61 | 0.06   | 0.65    | 0.85 | -0.02  | 0.90    | 0.97 | -0.04  | 0.79    | 0.97 | -0.05  | 0.73    | 0.99 |
| Akkermansia                   | 0.03   | 0.73    | 0.85 | -0.06  | 0.41    | 0.75 | -0.08  | 0.26    | 0.74 | -0.09  | 0.24    | 0.70 | -0.08  | 0.28    | 0.84 |
| Alistipes                     | 0.21   | 0.10    | 0.39 | 0.09   | 0.44    | 0.75 | 0.01   | 0.91    | 0.97 | 0.01   | 0.93    | 0.97 | 0.05   | 0.67    | 0.99 |
| Allisonella                   | -0.01  | 0.92    | 0.95 | 0.13   | 0.25    | 0.67 | 0.10   | 0.41    | 0.97 | 0.10   | 0.42    | 0.97 | 0.09   | 0.44    | 0.96 |
| Anaerofilum                   | 0.03   | 0.85    | 0.90 | -0.08  | 0.60    | 0.84 | -0.10  | 0.51    | 0.97 | -0.10  | 0.50    | 0.97 | -0.09  | 0.56    | 0.99 |
| Anaerostipes                  | 0.14   | 0.42    | 0.67 | 0.02   | 0.90    | 0.92 | 0.07   | 0.69    | 0.97 | 0.06   | 0.73    | 0.97 | 0.05   | 0.79    | 0.99 |
| Anaerotruncus                 | -0.13  | 0.38    | 0.66 | -0.22  | 0.10    | 0.48 | -0.19  | 0.16    | 0.69 | -0.18  | 0.20    | 0.69 | -0.16  | 0.24    | 0.75 |
| Bacteroides                   | 0.08   | 0.73    | 0.85 | 0.07   | 0.75    | 0.87 | 0.11   | 0.60    | 0.97 | 0.09   | 0.67    | 0.97 | 0.11   | 0.59    | 0.99 |
| Barnesiella                   | 0.16   | 0.02    | 0.27 | 0.17   | 0.01    | 0.19 | 0.14   | 0.03    | 0.54 | 0.14   | 0.03    | 0.53 | 0.13   | 0.04    | 0.53 |
| Bifidobacterium               | 0.00   | 1.00    | 1.00 | 0.07   | 0.40    | 0.75 | 0.04   | 0.62    | 0.97 | 0.03   | 0.68    | 0.97 | 0.03   | 0.73    | 0.99 |
| Bilophila                     | 0.15   | 0.14    | 0.45 | 0.05   | 0.54    | 0.81 | 0.03   | 0.76    | 0.97 | 0.02   | 0.86    | 0.97 | 0.02   | 0.82    | 0.99 |
| Blautia                       | 0.18   | 0.57    | 0.76 | -0.09  | 0.75    | 0.87 | -0.06  | 0.84    | 0.97 | -0.06  | 0.85    | 0.97 | -0.05  | 0.87    | 0.99 |
| Butyricoccus                  | 0.34   | 0.17    | 0.49 | 0.05   | 0.84    | 0.88 | -0.02  | 0.95    | 0.97 | -0.01  | 0.96    | 0.97 | -0.01  | 0.98    | 0.99 |
| Butyricimonas                 | 0.03   | 0.76    | 0.85 | -0.02  | 0.81    | 0.87 | -0.01  | 0.86    | 0.97 | -0.01  | 0.85    | 0.97 | 0.00   | 0.99    | 0.99 |
| CAG.56                        | 0.10   | 0.25    | 0.53 | 0.04   | 0.59    | 0.84 | 0.02   | 0.78    | 0.97 | 0.02   | 0.77    | 0.97 | 0.04   | 0.65    | 0.99 |
| Candidatus_Soleaferrea        | -0.12  | 0.48    | 0.69 | -0.25  | 0.10    | 0.48 | -0.31  | 0.06    | 0.54 | -0.30  | 0.06    | 0.56 | -0.29  | 0.07    | 0.53 |
| Caproiciproducens             | -0.20  | 0.22    | 0.51 | -0.25  | 0.09    | 0.48 | -0.25  | 0.10    | 0.59 | -0.25  | 0.10    | 0.56 | -0.26  | 0.09    | 0.53 |
| Catenibacterium               | -0.02  | 0.77    | 0.85 | -0.03  | 0.65    | 0.85 | -0.03  | 0.75    | 0.97 | -0.02  | 0.77    | 0.97 | -0.04  | 0.63    | 0.99 |
| Christensenellaceae_R.7_group | 0.13   | 0.10    | 0.39 | 0.06   | 0.40    | 0.75 | 0.01   | 0.85    | 0.97 | 0.02   | 0.81    | 0.97 | 0.03   | 0.73    | 0.99 |
| Clostridium_sensu_stricto_1   | 0.07   | 0.47    | 0.69 | 0.11   | 0.16    | 0.60 | 0.14   | 0.12    | 0.62 | 0.14   | 0.11    | 0.60 | 0.11   | 0.21    | 0.71 |
| Colidextribacter              | -0.18  | 0.32    | 0.62 | -0.34  | 0.04    | 0.35 | -0.30  | 0.08    | 0.54 | -0.30  | 0.08    | 0.56 | -0.33  | 0.06    | 0.53 |
| Collinsella                   | 0.01   | 0.93    | 0.95 | 0.05   | 0.54    | 0.81 | 0.02   | 0.82    | 0.97 | 0.02   | 0.79    | 0.97 | 0.03   | 0.73    | 0.99 |
| Coprobacter                   | 0.11   | 0.20    | 0.51 | 0.08   | 0.36    | 0.75 | 0.02   | 0.77    | 0.97 | 0.03   | 0.73    | 0.97 | 0.05   | 0.56    | 0.99 |
| Coprococcus                   | 0.33   | 0.00    | 0.08 | 0.21   | 0.03    | 0.35 | 0.20   | 0.06    | 0.54 | 0.21   | 0.04    | 0.53 | 0.22   | 0.03    | 0.53 |
| Defluviitaleaceae_UCG.011     | 0.14   | 0.35    | 0.64 | 0.14   | 0.30    | 0.75 | 0.16   | 0.25    | 0.74 | 0.17   | 0.24    | 0.70 | 0.18   | 0.21    | 0.71 |
| Desulfovibrio                 | -0.06  | 0.48    | 0.69 | -0.06  | 0.43    | 0.75 | -0.07  | 0.38    | 0.97 | -0.06  | 0.48    | 0.97 | -0.04  | 0.60    | 0.99 |
| Dialister                     | 0.02   | 0.75    | 0.85 | 0.02   | 0.67    | 0.85 | 0.03   | 0.68    | 0.97 | 0.02   | 0.74    | 0.97 | 0.00   | 0.97    | 0.99 |
| Dorea                         | 0.17   | 0.22    | 0.51 | 0.09   | 0.49    | 0.79 | 0.09   | 0.50    | 0.97 | 0.09   | 0.47    | 0.97 | 0.11   | 0.41    | 0.94 |
| DTU089                        | 0.00   | 0.99    | 1.00 | -0.01  | 0.96    | 0.96 | -0.05  | 0.71    | 0.97 | -0.03  | 0.81    | 0.97 | -0.02  | 0.89    | 0.99 |
| Eggerthella                   | -0.06  | 0.67    | 0.84 | -0.11  | 0.36    | 0.75 | -0.03  | 0.83    | 0.97 | -0.02  | 0.87    | 0.97 | -0.01  | 0.90    | 0.99 |
| Eisenbergiella                | -0.28  | 0.06    | 0.36 | -0.26  | 0.05    | 0.35 | -0.24  | 0.08    | 0.54 | -0.23  | 0.10    | 0.56 | -0.25  | 0.08    | 0.53 |
| Enterorhabdus                 | 0.04   | 0.72    | 0.85 | -0.03  | 0.80    | 0.87 | -0.02  | 0.89    | 0.97 | -0.01  | 0.92    | 0.97 | -0.01  | 0.93    | 0.99 |
| Erysipelatoclostridium        | -0.18  | 0.19    | 0.51 | -0.14  | 0.29    | 0.75 | -0.08  | 0.55    | 0.97 | -0.07  | 0.62    | 0.97 | -0.09  | 0.52    | 0.99 |
| Erysipelotrichaceae_UCG.003   | 0.08   | 0.40    | 0.66 | 0.06   | 0.54    | 0.81 | 0.01   | 0.92    | 0.97 | 0.01   | 0.93    | 0.97 | 0.01   | 0.89    | 0.99 |
| Escherichia.Shigella          | -0.09  | 0.35    | 0.64 | 0.01   | 0.95    | 0.96 | 0.02   | 0.83    | 0.97 | 0.01   | 0.88    | 0.97 | 0.03   | 0.79    | 0.99 |
| Faecalibacterium              | 0.24   | 0.12    | 0.41 | 0.26   | 0.06    | 0.37 | 0.30   | 0.05    | 0.54 | 0.30   | 0.04    | 0.53 | 0.30   | 0.05    | 0.53 |
| Family_XIII_AD3011_group      | 0.24   | 0.05    | 0.34 | 0.06   | 0.59    | 0.84 | 0.02   | 0.85    | 0.97 | 0.04   | 0.73    | 0.97 | 0.06   | 0.61    | 0.99 |
| Family_XIII_UCG.001           | 0.08   | 0.60    | 0.78 | -0.01  | 0.96    | 0.96 | -0.01  | 0.93    | 0.97 | 0.01   | 0.95    | 0.97 | 0.03   | 0.85    | 0.99 |
| FD2005                        | -0.12  | 0.35    | 0.64 | -0.09  | 0.43    | 0.75 | -0.14  | 0.25    | 0.74 | -0.16  | 0.19    | 0.69 | -0.16  | 0.20    | 0.71 |
| Flavonifractor                | -0.10  | 0.40    | 0.66 | -0.07  | 0.49    | 0.79 | 0.00   | 0.99    | 0.99 | 0.00   | 0.97    | 0.98 | -0.02  | 0.86    | 0.99 |
| Fournierella                  | 0.09   | 0.47    | 0.69 | 0.07   | 0.53    | 0.81 | 0.02   | 0.89    | 0.97 | 0.03   | 0.83    | 0.97 | 0.04   | 0.74    | 0.99 |
| Frisingicoccus                | -0.14  | 0.21    | 0.51 | -0.10  | 0.35    | 0.75 | -0.11  | 0.30    | 0.83 | -0.12  | 0.27    | 0.76 | -0.10  | 0.34    | 0.88 |
| Fusicatenibacter              | 0.06   | 0.57    | 0.76 | 0.03   | 0.78    | 0.87 | -0.01  | 0.96    | 0.97 | -0.01  | 0.91    | 0.97 | -0.01  | 0.93    | 0.99 |
| Fusobacterium                 | -0.06  | 0.68    | 0.84 | 0.04   | 0.74    | 0.87 | 0.09   | 0.53    | 0.97 | 0.10   | 0.47    | 0.97 | 0.13   | 0.36    | 0.90 |
| GCA.900066575                 | 0.16   | 0.24    | 0.53 | 0.07   | 0.55    | 0.81 | 0.03   | 0.83    | 0.97 | 0.03   | 0.78    | 0.97 | 0.04   | 0.73    | 0.99 |
| Gordonibacter                 | -0.11  | 0.47    | 0.69 | -0.17  | 0.22    | 0.63 | -0.10  | 0.46    | 0.97 | -0.09  | 0.52    | 0.97 | -0.07  | 0.62    | 0.99 |
| Granulicatella                | -0.20  | 0.31    | 0.62 | -0.09  | 0.61    | 0.84 | -0.04  | 0.82    | 0.97 | -0.04  | 0.84    | 0.97 | -0.06  | 0.74    | 0.99 |
| Haemophilus                   | 0.20   | 0.03    | 0.27 | 0.20   | 0.02    | 0.26 | 0.16   | 0.08    | 0.54 | 0.17   | 0.07    | 0.56 | 0.16   | 0.08    | 0.53 |
| Harryflintia                  | -0.20  | 0.20    | 0.51 | -0.30  | 0.04    | 0.35 | -0.33  | 0.03    | 0.54 | -0.33  | 0.03    | 0.53 | -0.30  | 0.05    | 0.53 |
| Holdemanella                  | 0.08   | 0.41    | 0.66 | 0.07   | 0.40    | 0.75 | 0.07   | 0.41    | 0.97 | 0.07   | 0.41    | 0.97 | 0.09   | 0.33    | 0.88 |

|                               |       |      |      |       |      |      |       |      |      |       |      |      |       |      |      |
|-------------------------------|-------|------|------|-------|------|------|-------|------|------|-------|------|------|-------|------|------|
| Holdemania                    | -0.44 | 0.09 | 0.39 | -0.38 | 0.10 | 0.48 | -0.37 | 0.13 | 0.62 | -0.35 | 0.16 | 0.68 | -0.31 | 0.20 | 0.71 |
| Howardella                    | -0.10 | 0.39 | 0.66 | -0.13 | 0.21 | 0.63 | -0.14 | 0.19 | 0.70 | -0.13 | 0.22 | 0.70 | -0.14 | 0.20 | 0.71 |
| Hungatella                    | -0.44 | 0.00 | 0.05 | -0.41 | 0.00 | 0.06 | -0.38 | 0.00 | 0.18 | -0.37 | 0.00 | 0.23 | -0.40 | 0.00 | 0.16 |
| Hydrogenoanaerobacterium      | 0.34  | 0.03 | 0.27 | 0.18  | 0.21 | 0.63 | 0.09  | 0.57 | 0.97 | 0.10  | 0.53 | 0.97 | 0.10  | 0.53 | 0.99 |
| Incertae_Sedis                | 0.05  | 0.83 | 0.89 | 0.08  | 0.70 | 0.86 | 0.08  | 0.73 | 0.97 | 0.07  | 0.74 | 0.97 | 0.09  | 0.69 | 0.99 |
| Intestinibacter               | 0.24  | 0.04 | 0.30 | 0.31  | 0.00 | 0.13 | 0.28  | 0.01 | 0.38 | 0.27  | 0.02 | 0.52 | 0.26  | 0.02 | 0.53 |
| Intestinimonas                | 0.07  | 0.54 | 0.74 | -0.11 | 0.33 | 0.75 | -0.16 | 0.16 | 0.68 | -0.17 | 0.15 | 0.68 | -0.14 | 0.23 | 0.74 |
| Lachnoclostridium             | -0.55 | 0.03 | 0.27 | -0.47 | 0.04 | 0.35 | -0.29 | 0.21 | 0.70 | -0.31 | 0.19 | 0.69 | -0.33 | 0.16 | 0.71 |
| Lachnospira                   | 0.42  | 0.00 | 0.05 | 0.27  | 0.02 | 0.26 | 0.16  | 0.21 | 0.70 | 0.15  | 0.24 | 0.70 | 0.15  | 0.22 | 0.71 |
| Lachnospiraceae_FCS020_group  | 0.27  | 0.03 | 0.27 | 0.17  | 0.13 | 0.56 | 0.15  | 0.22 | 0.70 | 0.15  | 0.21 | 0.70 | 0.15  | 0.20 | 0.71 |
| Lachnospiraceae_ND3007_group  | 0.22  | 0.01 | 0.21 | 0.15  | 0.05 | 0.35 | 0.14  | 0.09 | 0.54 | 0.14  | 0.09 | 0.56 | 0.14  | 0.08 | 0.53 |
| Lachnospiraceae_NK4A136_group | 0.20  | 0.10 | 0.39 | 0.07  | 0.50 | 0.80 | -0.06 | 0.62 | 0.97 | -0.05 | 0.65 | 0.97 | -0.04 | 0.75 | 0.99 |
| Lachnospiraceae_UCG.001       | 0.15  | 0.08 | 0.39 | 0.10  | 0.18 | 0.63 | 0.07  | 0.42 | 0.97 | 0.07  | 0.41 | 0.97 | 0.07  | 0.43 | 0.96 |
| Lachnospiraceae_UCG.004       | 0.18  | 0.09 | 0.39 | 0.09  | 0.38 | 0.75 | 0.06  | 0.58 | 0.97 | 0.05  | 0.59 | 0.97 | 0.03  | 0.74 | 0.99 |
| Lachnospiraceae_UCG.010       | -0.06 | 0.70 | 0.84 | -0.16 | 0.22 | 0.64 | -0.19 | 0.16 | 0.68 | -0.18 | 0.19 | 0.69 | -0.15 | 0.28 | 0.84 |
| Lactobacillus                 | -0.28 | 0.03 | 0.27 | -0.16 | 0.16 | 0.60 | -0.22 | 0.07 | 0.54 | -0.22 | 0.07 | 0.56 | -0.28 | 0.03 | 0.53 |
| Lactococcus                   | 0.13  | 0.39 | 0.66 | 0.04  | 0.76 | 0.87 | 0.08  | 0.57 | 0.97 | 0.10  | 0.51 | 0.97 | 0.10  | 0.48 | 0.99 |
| Marvinbryantia                | 0.12  | 0.22 | 0.51 | 0.04  | 0.65 | 0.85 | 0.04  | 0.65 | 0.97 | 0.05  | 0.61 | 0.97 | 0.05  | 0.56 | 0.99 |
| Megasphaera                   | -0.13 | 0.08 | 0.39 | -0.06 | 0.37 | 0.75 | -0.02 | 0.75 | 0.97 | -0.02 | 0.74 | 0.97 | -0.04 | 0.63 | 0.99 |
| Monoglobus                    | 0.19  | 0.10 | 0.39 | 0.14  | 0.21 | 0.63 | 0.07  | 0.55 | 0.97 | 0.08  | 0.52 | 0.97 | 0.10  | 0.40 | 0.94 |
| Moryella                      | 0.30  | 0.05 | 0.34 | 0.22  | 0.13 | 0.56 | 0.10  | 0.51 | 0.97 | 0.12  | 0.45 | 0.97 | 0.11  | 0.46 | 0.99 |
| Negativibacillus              | -0.17 | 0.11 | 0.39 | -0.24 | 0.01 | 0.26 | -0.27 | 0.01 | 0.30 | -0.28 | 0.01 | 0.28 | -0.26 | 0.01 | 0.40 |
| NK4A214_group                 | 0.07  | 0.43 | 0.67 | -0.02 | 0.78 | 0.87 | -0.08 | 0.32 | 0.87 | -0.08 | 0.35 | 0.90 | -0.07 | 0.39 | 0.94 |
| Odoribacter                   | 0.10  | 0.23 | 0.52 | 0.09  | 0.23 | 0.65 | 0.05  | 0.56 | 0.97 | 0.04  | 0.58 | 0.97 | 0.06  | 0.42 | 0.94 |
| Oscillibacter                 | 0.08  | 0.55 | 0.75 | 0.03  | 0.82 | 0.87 | -0.02 | 0.86 | 0.97 | -0.01 | 0.92 | 0.97 | -0.02 | 0.90 | 0.99 |
| Oscillospira                  | 0.10  | 0.60 | 0.78 | 0.07  | 0.68 | 0.85 | 0.08  | 0.67 | 0.97 | 0.09  | 0.62 | 0.97 | 0.11  | 0.55 | 0.99 |
| Oxalobacter                   | 0.32  | 0.02 | 0.27 | 0.18  | 0.15 | 0.59 | 0.16  | 0.21 | 0.70 | 0.17  | 0.20 | 0.69 | 0.22  | 0.10 | 0.53 |
| Paludicola                    | 0.24  | 0.08 | 0.39 | 0.03  | 0.82 | 0.87 | -0.04 | 0.78 | 0.97 | -0.01 | 0.93 | 0.97 | 0.00  | 0.99 | 0.99 |
| Parabacteroides               | 0.03  | 0.77 | 0.85 | 0.10  | 0.28 | 0.74 | 0.11  | 0.21 | 0.70 | 0.13  | 0.16 | 0.68 | 0.14  | 0.12 | 0.61 |
| Paraprevotella                | 0.00  | 0.98 | 1.00 | 0.02  | 0.70 | 0.86 | 0.02  | 0.76 | 0.97 | 0.03  | 0.67 | 0.97 | 0.01  | 0.85 | 0.99 |
| Parasutterella                | 0.17  | 0.03 | 0.27 | 0.16  | 0.01 | 0.26 | 0.11  | 0.13 | 0.63 | 0.11  | 0.15 | 0.68 | 0.13  | 0.08 | 0.53 |
| Peptococcus                   | -0.05 | 0.70 | 0.84 | -0.17 | 0.16 | 0.60 | -0.23 | 0.07 | 0.54 | -0.22 | 0.08 | 0.56 | -0.21 | 0.10 | 0.53 |
| Phascolarctobacterium         | 0.05  | 0.51 | 0.71 | 0.05  | 0.45 | 0.76 | 0.06  | 0.40 | 0.97 | 0.06  | 0.34 | 0.90 | 0.09  | 0.20 | 0.71 |
| Phocaea                       | -0.15 | 0.41 | 0.66 | -0.25 | 0.13 | 0.56 | -0.35 | 0.04 | 0.54 | -0.35 | 0.04 | 0.53 | -0.34 | 0.04 | 0.53 |
| Prevotella                    | -0.07 | 0.25 | 0.53 | -0.05 | 0.38 | 0.75 | -0.05 | 0.33 | 0.89 | -0.05 | 0.33 | 0.90 | -0.06 | 0.31 | 0.87 |
| Romboutsia                    | 0.09  | 0.41 | 0.66 | 0.13  | 0.17 | 0.61 | 0.12  | 0.24 | 0.74 | 0.12  | 0.24 | 0.70 | 0.10  | 0.35 | 0.88 |
| Roseburia                     | 0.35  | 0.01 | 0.25 | 0.24  | 0.07 | 0.40 | 0.09  | 0.52 | 0.97 | 0.08  | 0.54 | 0.97 | 0.08  | 0.56 | 0.99 |
| Ruminococcus                  | 0.08  | 0.32 | 0.62 | 0.04  | 0.63 | 0.85 | -0.02 | 0.83 | 0.97 | -0.02 | 0.85 | 0.97 | -0.02 | 0.81 | 0.99 |
| Sellimonas                    | 0.16  | 0.17 | 0.49 | 0.18  | 0.08 | 0.46 | 0.19  | 0.09 | 0.54 | 0.19  | 0.08 | 0.56 | 0.19  | 0.08 | 0.53 |
| Senegalimassilia              | 0.04  | 0.70 | 0.84 | 0.03  | 0.78 | 0.87 | 0.01  | 0.94 | 0.97 | 0.02  | 0.88 | 0.97 | 0.01  | 0.91 | 0.99 |
| Shuttleworthia                | 0.11  | 0.45 | 0.68 | 0.04  | 0.78 | 0.87 | 0.01  | 0.96 | 0.97 | 0.00  | 1.00 | 1.00 | 0.00  | 0.99 | 0.99 |
| Slackia                       | -0.06 | 0.49 | 0.70 | -0.04 | 0.68 | 0.85 | -0.06 | 0.54 | 0.97 | -0.05 | 0.60 | 0.97 | -0.04 | 0.68 | 0.99 |
| Streptococcus                 | 0.06  | 0.70 | 0.84 | 0.07  | 0.61 | 0.84 | 0.10  | 0.50 | 0.97 | 0.13  | 0.38 | 0.95 | 0.09  | 0.54 | 0.99 |
| Subdoligranulum               | 0.14  | 0.21 | 0.51 | 0.08  | 0.44 | 0.75 | 0.03  | 0.75 | 0.97 | 0.04  | 0.70 | 0.97 | 0.05  | 0.64 | 0.99 |
| Sutterella                    | -0.09 | 0.17 | 0.49 | -0.05 | 0.40 | 0.75 | -0.01 | 0.82 | 0.97 | -0.01 | 0.87 | 0.97 | -0.02 | 0.80 | 0.99 |
| TM7x                          | -0.04 | 0.78 | 0.85 | -0.11 | 0.42 | 0.75 | -0.03 | 0.83 | 0.97 | -0.02 | 0.88 | 0.97 | -0.02 | 0.87 | 0.99 |
| Turicibacter                  | 0.29  | 0.04 | 0.30 | 0.42  | 0.00 | 0.06 | 0.42  | 0.00 | 0.18 | 0.41  | 0.00 | 0.23 | 0.40  | 0.00 | 0.16 |
| Tuzzerella                    | -0.13 | 0.22 | 0.51 | -0.12 | 0.21 | 0.63 | -0.14 | 0.17 | 0.70 | -0.15 | 0.16 | 0.68 | -0.14 | 0.18 | 0.71 |
| UBA1819                       | -0.25 | 0.12 | 0.42 | -0.30 | 0.04 | 0.35 | -0.28 | 0.07 | 0.54 | -0.27 | 0.09 | 0.56 | -0.26 | 0.10 | 0.54 |
| UCG.002                       | 0.02  | 0.77 | 0.85 | -0.06 | 0.40 | 0.75 | -0.10 | 0.20 | 0.70 | -0.10 | 0.23 | 0.70 | -0.08 | 0.34 | 0.88 |
| UCG.003                       | 0.16  | 0.07 | 0.39 | 0.07  | 0.34 | 0.75 | 0.03  | 0.76 | 0.97 | 0.03  | 0.71 | 0.97 | 0.04  | 0.64 | 0.99 |
| UCG.005                       | 0.14  | 0.16 | 0.49 | 0.07  | 0.41 | 0.75 | 0.01  | 0.92 | 0.97 | 0.03  | 0.80 | 0.97 | 0.03  | 0.73 | 0.99 |
| UCG.009                       | 0.14  | 0.31 | 0.62 | 0.05  | 0.68 | 0.85 | -0.04 | 0.77 | 0.97 | -0.03 | 0.81 | 0.97 | -0.03 | 0.84 | 0.99 |
| Veillonella                   | 0.14  | 0.14 | 0.45 | 0.18  | 0.05 | 0.35 | 0.15  | 0.12 | 0.62 | 0.15  | 0.12 | 0.60 | 0.14  | 0.15 | 0.71 |
| Victivallis                   | 0.11  | 0.26 | 0.55 | 0.06  | 0.49 | 0.79 | 0.01  | 0.90 | 0.97 | 0.01  | 0.91 | 0.97 | 0.01  | 0.92 | 0.99 |

Multivariable-adjusted regression models adjusted for:

Model 1: sequencing batch, age, race, gender, study center

Model 2: Model 1, with education

Model 3: Model 2, with physical activity, diet score, medication use, and smoking

Model 4: Model 3 with BMI

Model 5: Model 4 with hypertension and diabetes

eTable 54: Multivariable-adjusted regression coefficients, p-values, and false discovery rate (FDR)-adjusted p-values for genera among female participants with respect to DSST.

|                               | Model1 |         |      | Model2 |         |      | Model3 |         |      | Model4 |         |      | Model5 |         |      |
|-------------------------------|--------|---------|------|--------|---------|------|--------|---------|------|--------|---------|------|--------|---------|------|
|                               | beta   | p-value | FDR  | beta   | p-value | FDR  | beta   | p-value | FDR  | beta   | p-value | FDR  | beta   | p-value | FDR  |
| Acetanaerobacterium           | -0.05  | 0.98    | 0.98 | 0.77   | 0.65    | 0.92 | 0.75   | 0.67    | 0.99 | 0.42   | 0.81    | 1.00 | 0.17   | 0.92    | 0.99 |
| Acidaminococcus               | -1.28  | 0.03    | 0.35 | -0.94  | 0.11    | 0.61 | -0.57  | 0.37    | 0.94 | -0.55  | 0.38    | 0.99 | -0.76  | 0.24    | 0.97 |
| Actinomyces                   | -0.14  | 0.93    | 0.98 | 0.28   | 0.85    | 0.97 | 1.20   | 0.46    | 0.94 | 1.43   | 0.37    | 0.99 | 1.81   | 0.26    | 0.97 |
| Adlercreutzia                 | 2.26   | 0.02    | 0.23 | 1.95   | 0.04    | 0.52 | 1.59   | 0.11    | 0.91 | 1.38   | 0.17    | 0.99 | 1.24   | 0.21    | 0.97 |
| Agathobacter                  | -0.35  | 0.76    | 0.91 | -0.23  | 0.83    | 0.97 | -0.69  | 0.55    | 0.96 | -0.43  | 0.71    | 1.00 | -0.31  | 0.78    | 0.97 |
| Akkermansia                   | 1.44   | 0.01    | 0.23 | 1.30   | 0.02    | 0.48 | 1.34   | 0.03    | 0.87 | 1.28   | 0.03    | 0.99 | 1.37   | 0.02    | 0.56 |
| Alistipes                     | -0.13  | 0.89    | 0.98 | -0.11  | 0.91    | 0.99 | -0.37  | 0.70    | 0.99 | -0.43  | 0.66    | 1.00 | -0.47  | 0.63    | 0.97 |
| Anaerofilum                   | 2.40   | 0.07    | 0.39 | 1.47   | 0.26    | 0.75 | 1.27   | 0.34    | 0.94 | 1.02   | 0.44    | 0.99 | 1.37   | 0.31    | 0.97 |
| Anaerostipes                  | -0.60  | 0.66    | 0.88 | -0.78  | 0.56    | 0.90 | -0.62  | 0.65    | 0.98 | -0.68  | 0.62    | 1.00 | -0.83  | 0.55    | 0.97 |
| Anaerotruncus                 | 2.05   | 0.09    | 0.41 | 1.88   | 0.11    | 0.61 | 1.63   | 0.19    | 0.91 | 1.20   | 0.34    | 0.99 | 0.85   | 0.50    | 0.97 |
| Angelakisella                 | -1.64  | 0.35    | 0.69 | -2.27  | 0.18    | 0.68 | -1.56  | 0.40    | 0.94 | -1.90  | 0.30    | 0.99 | -1.98  | 0.28    | 0.97 |
| Bacteroides                   | -2.72  | 0.26    | 0.64 | -3.27  | 0.17    | 0.68 | -2.98  | 0.21    | 0.91 | -2.63  | 0.27    | 0.99 | -2.41  | 0.31    | 0.97 |
| Barnesiella                   | 1.34   | 0.02    | 0.23 | 1.30   | 0.02    | 0.43 | 1.34   | 0.02    | 0.87 | 1.34   | 0.02    | 0.99 | 1.54   | 0.01    | 0.56 |
| Bifidobacterium               | 0.13   | 0.86    | 0.98 | 0.53   | 0.48    | 0.88 | 0.08   | 0.92    | 0.99 | 0.07   | 0.93    | 1.00 | 0.17   | 0.83    | 0.97 |
| Bilophila                     | -0.17  | 0.83    | 0.95 | -0.14  | 0.85    | 0.97 | -0.48  | 0.52    | 0.96 | -0.52  | 0.48    | 0.99 | -0.54  | 0.48    | 0.97 |
| Blautia                       | 2.30   | 0.39    | 0.73 | 2.42   | 0.35    | 0.80 | 3.30   | 0.21    | 0.91 | 3.07   | 0.24    | 0.99 | 3.20   | 0.24    | 0.97 |
| Butyricoccus                  | 1.41   | 0.41    | 0.73 | 0.62   | 0.71    | 0.92 | 0.40   | 0.82    | 0.99 | 0.62   | 0.72    | 1.00 | 0.55   | 0.75    | 0.97 |
| Butyricimonas                 | 0.22   | 0.73    | 0.91 | 0.05   | 0.94    | 0.99 | -0.09  | 0.89    | 0.99 | 0.00   | 1.00    | 1.00 | -0.03  | 0.96    | 0.99 |
| CAG.56                        | 0.66   | 0.40    | 0.73 | 0.54   | 0.48    | 0.88 | 0.07   | 0.93    | 0.99 | 0.11   | 0.89    | 1.00 | 0.38   | 0.64    | 0.97 |
| Candidatus_Soleaferrea        | 2.06   | 0.20    | 0.60 | 1.98   | 0.21    | 0.72 | 2.06   | 0.21    | 0.91 | 1.94   | 0.23    | 0.99 | 1.88   | 0.25    | 0.97 |
| Caproiciproducens             | 1.51   | 0.24    | 0.63 | 1.65   | 0.18    | 0.68 | 0.54   | 0.68    | 0.99 | 0.35   | 0.79    | 1.00 | 0.08   | 0.95    | 0.99 |
| Christensenellaceae_R.7_group | 1.62   | 0.01    | 0.23 | 1.33   | 0.03    | 0.52 | 0.91   | 0.19    | 0.91 | 0.75   | 0.28    | 0.99 | 0.89   | 0.20    | 0.97 |
| Clostridium_sensu_stricto_1   | -0.30  | 0.73    | 0.91 | -0.37  | 0.66    | 0.92 | -0.58  | 0.50    | 0.96 | -0.57  | 0.50    | 0.99 | -0.59  | 0.49    | 0.97 |
| Colidextribacter              | -1.62  | 0.34    | 0.69 | -1.73  | 0.29    | 0.75 | -1.26  | 0.47    | 0.95 | -1.63  | 0.35    | 0.99 | -1.38  | 0.44    | 0.97 |
| Collinsella                   | -1.06  | 0.13    | 0.47 | -0.46  | 0.51    | 0.88 | -0.16  | 0.82    | 0.99 | 0.00   | 1.00    | 1.00 | 0.21   | 0.77    | 0.97 |
| Coprobacter                   | -0.38  | 0.63    | 0.88 | -0.70  | 0.37    | 0.82 | -0.89  | 0.29    | 0.94 | -0.95  | 0.25    | 0.99 | -0.75  | 0.37    | 0.97 |
| Coprococcus                   | 0.37   | 0.65    | 0.88 | 0.67   | 0.40    | 0.84 | 0.71   | 0.39    | 0.94 | 0.78   | 0.35    | 0.99 | 0.96   | 0.25    | 0.97 |
| Defluviitaleaceae_UCG.011     | 2.89   | 0.02    | 0.23 | 2.44   | 0.04    | 0.52 | 1.28   | 0.31    | 0.94 | 0.96   | 0.44    | 0.99 | 0.51   | 0.69    | 0.97 |
| Desulfovibrio                 | 0.30   | 0.69    | 0.89 | 0.40   | 0.58    | 0.90 | 0.42   | 0.58    | 0.96 | 0.35   | 0.64    | 1.00 | 0.29   | 0.70    | 0.97 |
| Dialister                     | 0.22   | 0.69    | 0.89 | 0.21   | 0.70    | 0.92 | 0.23   | 0.69    | 0.99 | 0.24   | 0.67    | 1.00 | 0.32   | 0.58    | 0.97 |
| DNF00809                      | 1.82   | 0.19    | 0.60 | 1.72   | 0.20    | 0.71 | 1.64   | 0.24    | 0.93 | 1.58   | 0.26    | 0.99 | 1.52   | 0.28    | 0.97 |
| Dorea                         | -1.07  | 0.31    | 0.68 | -0.67  | 0.52    | 0.88 | -0.80  | 0.45    | 0.94 | -0.61  | 0.57    | 1.00 | -0.67  | 0.53    | 0.97 |
| DTU089                        | 0.44   | 0.70    | 0.89 | 0.21   | 0.85    | 0.97 | 0.14   | 0.90    | 0.99 | 0.05   | 0.97    | 1.00 | -0.03  | 0.98    | 0.99 |
| Eggerthella                   | 1.19   | 0.27    | 0.64 | 1.14   | 0.27    | 0.75 | 1.42   | 0.20    | 0.91 | 1.24   | 0.26    | 0.99 | 1.44   | 0.19    | 0.97 |
| Eisenbergiella                | 1.73   | 0.10    | 0.43 | 1.67   | 0.10    | 0.61 | 1.59   | 0.13    | 0.91 | 1.24   | 0.24    | 0.99 | 1.26   | 0.23    | 0.97 |
| Erysipelatoclostridium        | 0.53   | 0.65    | 0.88 | 0.47   | 0.68    | 0.92 | 0.72   | 0.54    | 0.96 | 0.48   | 0.68    | 1.00 | 0.58   | 0.62    | 0.97 |
| Erysipelotrichaceae_UCG.003   | 0.80   | 0.34    | 0.69 | 0.78   | 0.34    | 0.80 | 0.17   | 0.85    | 0.99 | 0.09   | 0.92    | 1.00 | 0.20   | 0.82    | 0.97 |
| Escherichia_Shigella          | 0.88   | 0.24    | 0.63 | 1.04   | 0.15    | 0.68 | 1.23   | 0.11    | 0.91 | 1.30   | 0.09    | 0.99 | 1.15   | 0.15    | 0.97 |
| Faecalibacterium              | 1.09   | 0.30    | 0.66 | 0.60   | 0.56    | 0.90 | 0.07   | 0.95    | 0.99 | 0.23   | 0.83    | 1.00 | 0.44   | 0.68    | 0.97 |
| Family_XIII_AD3011_group      | 2.02   | 0.05    | 0.38 | 1.79   | 0.08    | 0.61 | 1.36   | 0.22    | 0.92 | 1.17   | 0.29    | 0.99 | 1.08   | 0.33    | 0.97 |
| Family_XIII_UCG.001           | 0.91   | 0.49    | 0.81 | 0.68   | 0.60    | 0.91 | 0.20   | 0.88    | 0.99 | -0.07  | 0.96    | 1.00 | -0.28  | 0.83    | 0.97 |
| Flavonifractor                | -0.81  | 0.49    | 0.81 | -0.84  | 0.46    | 0.88 | -0.55  | 0.64    | 0.98 | -0.57  | 0.63    | 1.00 | -0.65  | 0.59    | 0.97 |
| Frisingicoccus                | 0.02   | 0.98    | 0.98 | -0.40  | 0.63    | 0.92 | -0.50  | 0.57    | 0.96 | -0.76  | 0.39    | 0.99 | -0.64  | 0.47    | 0.97 |
| Fusicatenibacter              | -0.04  | 0.96    | 0.98 | -0.29  | 0.71    | 0.92 | -0.17  | 0.84    | 0.99 | 0.08   | 0.92    | 1.00 | 0.10   | 0.91    | 0.99 |
| Fusobacterium                 | 0.03   | 0.98    | 0.98 | 0.29   | 0.83    | 0.97 | 1.15   | 0.42    | 0.94 | 0.95   | 0.50    | 0.99 | 0.80   | 0.57    | 0.97 |
| GCA.900066575                 | 0.34   | 0.78    | 0.92 | -0.22  | 0.85    | 0.97 | -1.29  | 0.30    | 0.94 | -1.59  | 0.20    | 0.99 | -1.50  | 0.24    | 0.97 |
| GCA.900066755                 | 0.88   | 0.64    | 0.88 | 1.02   | 0.58    | 0.90 | 1.03   | 0.58    | 0.96 | 0.52   | 0.78    | 1.00 | 1.25   | 0.51    | 0.97 |
| Gordonibacter                 | 1.39   | 0.22    | 0.63 | 1.16   | 0.30    | 0.75 | 0.20   | 0.86    | 0.99 | -0.16  | 0.89    | 1.00 | -0.28  | 0.81    | 0.97 |
| Granulicatella                | -0.13  | 0.93    | 0.98 | -0.20  | 0.89    | 0.99 | -0.73  | 0.63    | 0.98 | -0.49  | 0.75    | 1.00 | -0.09  | 0.95    | 0.99 |
| Haemophilus                   | 0.58   | 0.53    | 0.81 | 0.22   | 0.81    | 0.97 | -0.34  | 0.71    | 0.99 | -0.36  | 0.70    | 1.00 | -0.09  | 0.92    | 0.99 |
| Harryflintia                  | -0.03  | 0.98    | 0.98 | -0.01  | 1.00    | 1.00 | 0.29   | 0.83    | 0.99 | -0.03  | 0.98    | 1.00 | 0.07   | 0.96    | 0.99 |

|                               |       |      |      |       |      |      |       |      |      |       |      |      |       |      |      |
|-------------------------------|-------|------|------|-------|------|------|-------|------|------|-------|------|------|-------|------|------|
| Holdemania                    | 1.68  | 0.40 | 0.73 | 1.50  | 0.44 | 0.88 | 1.53  | 0.45 | 0.94 | 1.29  | 0.52 | 0.99 | 1.32  | 0.51 | 0.97 |
| Hungatella                    | 0.97  | 0.34 | 0.69 | 1.20  | 0.23 | 0.75 | 1.72  | 0.10 | 0.91 | 1.70  | 0.10 | 0.99 | 1.72  | 0.10 | 0.97 |
| Hydrogenoanaerobacterium      | 0.74  | 0.49 | 0.81 | 0.17  | 0.87 | 0.98 | -0.22 | 0.84 | 0.99 | -0.64 | 0.57 | 1.00 | -0.54 | 0.63 | 0.97 |
| Incertae_Sedis                | 2.61  | 0.13 | 0.47 | 2.59  | 0.12 | 0.61 | 2.52  | 0.15 | 0.91 | 2.37  | 0.18 | 0.99 | 2.40  | 0.17 | 0.97 |
| Intestinibacter               | 1.39  | 0.20 | 0.60 | 1.62  | 0.12 | 0.61 | 1.66  | 0.13 | 0.91 | 1.93  | 0.07 | 0.99 | 2.34  | 0.03 | 0.56 |
| Intestinimonas                | 1.26  | 0.18 | 0.60 | 0.99  | 0.28 | 0.75 | 0.62  | 0.52 | 0.96 | 0.24  | 0.81 | 1.00 | 0.36  | 0.72 | 0.97 |
| Lachnoclostridium             | -4.13 | 0.04 | 0.36 | -3.02 | 0.13 | 0.61 | -1.87 | 0.38 | 0.94 | -1.61 | 0.44 | 0.99 | -1.84 | 0.38 | 0.97 |
| Lachnospira                   | 2.98  | 0.00 | 0.11 | 2.35  | 0.02 | 0.43 | 1.80  | 0.08 | 0.91 | 1.98  | 0.05 | 0.99 | 2.20  | 0.03 | 0.56 |
| Lachnospiraceae_FCS020_group  | 3.82  | 0.00 | 0.04 | 3.14  | 0.00 | 0.35 | 2.78  | 0.01 | 0.87 | 2.85  | 0.01 | 0.99 | 2.70  | 0.02 | 0.56 |
| Lachnospiraceae_ND3007_group  | -0.47 | 0.51 | 0.81 | -0.78 | 0.26 | 0.75 | -1.13 | 0.12 | 0.91 | -0.96 | 0.18 | 0.99 | -0.80 | 0.27 | 0.97 |
| Lachnospiraceae_NK4A136_group | 0.49  | 0.64 | 0.88 | -0.09 | 0.93 | 0.99 | -0.98 | 0.38 | 0.94 | -0.82 | 0.46 | 0.99 | -0.67 | 0.55 | 0.97 |
| Lachnospiraceae_UCG.001       | 1.43  | 0.07 | 0.39 | 1.26  | 0.10 | 0.61 | 1.23  | 0.12 | 0.91 | 1.07  | 0.18 | 0.99 | 1.30  | 0.10 | 0.97 |
| Lachnospiraceae_UCG.004       | 0.53  | 0.51 | 0.81 | 0.42  | 0.59 | 0.90 | 0.11  | 0.89 | 0.99 | 0.21  | 0.79 | 1.00 | 0.22  | 0.79 | 0.97 |
| Lachnospiraceae_UCG.010       | 0.38  | 0.75 | 0.91 | -0.07 | 0.95 | 0.99 | -0.37 | 0.76 | 0.99 | -0.47 | 0.70 | 1.00 | -0.27 | 0.83 | 0.97 |
| Lactobacillus                 | -1.21 | 0.20 | 0.60 | -0.67 | 0.47 | 0.88 | -1.00 | 0.31 | 0.94 | -0.65 | 0.51 | 0.99 | -0.45 | 0.66 | 0.97 |
| Lactococcus                   | 0.56  | 0.68 | 0.89 | 0.51  | 0.70 | 0.92 | 0.07  | 0.96 | 0.99 | -0.02 | 0.99 | 1.00 | 0.20  | 0.89 | 0.98 |
| Marvinbryantia                | 0.92  | 0.25 | 0.63 | 0.79  | 0.31 | 0.75 | 0.38  | 0.65 | 0.98 | 0.38  | 0.64 | 1.00 | 0.54  | 0.51 | 0.97 |
| Megasphaera                   | -0.14 | 0.86 | 0.98 | 0.28  | 0.71 | 0.92 | 0.70  | 0.37 | 0.94 | 0.77  | 0.33 | 0.99 | 0.70  | 0.39 | 0.97 |
| Monoglobus                    | 3.01  | 0.00 | 0.16 | 2.78  | 0.01 | 0.37 | 2.27  | 0.04 | 0.91 | 2.21  | 0.04 | 0.99 | 2.57  | 0.02 | 0.56 |
| Moryella                      | 1.46  | 0.29 | 0.66 | 0.90  | 0.51 | 0.88 | 0.35  | 0.81 | 0.99 | 0.56  | 0.70 | 1.00 | 0.61  | 0.67 | 0.97 |
| Negativibacillus              | -0.54 | 0.52 | 0.81 | -0.25 | 0.76 | 0.94 | 0.04  | 0.97 | 0.99 | -0.04 | 0.97 | 1.00 | 0.01  | 0.99 | 0.99 |
| NK4A214_group                 | 0.66  | 0.32 | 0.68 | 0.50  | 0.43 | 0.88 | 0.38  | 0.57 | 0.96 | 0.27  | 0.69 | 1.00 | 0.46  | 0.50 | 0.97 |
| Odoribacter                   | 0.38  | 0.55 | 0.81 | 0.18  | 0.78 | 0.95 | 0.00  | 1.00 | 1.00 | -0.03 | 0.97 | 1.00 | -0.09 | 0.89 | 0.98 |
| Oscillibacter                 | 2.12  | 0.05 | 0.38 | 1.85  | 0.09 | 0.61 | 1.49  | 0.18 | 0.91 | 1.18  | 0.29 | 0.99 | 1.20  | 0.29 | 0.97 |
| Oscillospira                  | -0.09 | 0.95 | 0.98 | 0.09  | 0.95 | 0.99 | 0.14  | 0.93 | 0.99 | 0.07  | 0.97 | 1.00 | 0.33  | 0.83 | 0.97 |
| Oxalobacter                   | 1.70  | 0.13 | 0.47 | 0.91  | 0.41 | 0.84 | 0.89  | 0.45 | 0.94 | 0.85  | 0.47 | 0.99 | 0.54  | 0.65 | 0.97 |
| Paludicola                    | 2.19  | 0.06 | 0.38 | 1.89  | 0.10 | 0.61 | 0.96  | 0.42 | 0.94 | 0.59  | 0.62 | 1.00 | 0.64  | 0.60 | 0.97 |
| Parabacteroides               | -0.90 | 0.27 | 0.64 | -0.66 | 0.41 | 0.84 | -0.46 | 0.57 | 0.96 | -0.18 | 0.83 | 1.00 | 0.01  | 0.99 | 0.99 |
| Paraprevotella                | -1.30 | 0.04 | 0.36 | -1.21 | 0.05 | 0.59 | -0.98 | 0.14 | 0.91 | -1.01 | 0.12 | 0.99 | -0.87 | 0.18 | 0.97 |
| Parasutterella                | 0.50  | 0.41 | 0.73 | 0.37  | 0.54 | 0.89 | 0.44  | 0.49 | 0.96 | 0.48  | 0.45 | 0.99 | 0.36  | 0.57 | 0.97 |
| Peptococcus                   | 0.82  | 0.53 | 0.81 | 0.40  | 0.76 | 0.94 | 0.35  | 0.80 | 0.99 | 0.22  | 0.87 | 1.00 | 0.53  | 0.69 | 0.97 |
| Phascolarctobacterium         | -0.09 | 0.87 | 0.98 | 0.00  | 1.00 | 1.00 | -0.08 | 0.89 | 0.99 | -0.19 | 0.74 | 1.00 | -0.36 | 0.54 | 0.97 |
| Phoceae                       | -0.08 | 0.96 | 0.98 | -0.16 | 0.91 | 0.99 | 0.12  | 0.93 | 0.99 | 0.34  | 0.82 | 1.00 | 0.69  | 0.64 | 0.97 |
| Prevotella                    | -0.91 | 0.12 | 0.47 | -0.59 | 0.31 | 0.75 | -0.50 | 0.40 | 0.94 | -0.43 | 0.47 | 0.99 | -0.52 | 0.39 | 0.97 |
| Romboutsia                    | -0.07 | 0.95 | 0.98 | 0.04  | 0.97 | 1.00 | -0.14 | 0.89 | 0.99 | 0.02  | 0.98 | 1.00 | 0.34  | 0.74 | 0.97 |
| Roseburia                     | 0.64  | 0.55 | 0.81 | 0.69  | 0.50 | 0.88 | 0.13  | 0.90 | 0.99 | 0.34  | 0.76 | 1.00 | 0.40  | 0.72 | 0.97 |
| Ruminococcus                  | 1.73  | 0.01 | 0.23 | 1.32  | 0.06 | 0.59 | 1.01  | 0.17 | 0.91 | 0.97  | 0.18 | 0.99 | 1.16  | 0.12 | 0.97 |
| Sellimonas                    | 1.64  | 0.12 | 0.47 | 1.12  | 0.28 | 0.75 | 1.08  | 0.31 | 0.94 | 0.80  | 0.45 | 0.99 | 0.84  | 0.43 | 0.97 |
| Shuttleworthia                | 0.87  | 0.38 | 0.73 | -0.02 | 0.99 | 1.00 | -0.34 | 0.74 | 0.99 | -0.58 | 0.57 | 1.00 | -0.32 | 0.76 | 0.97 |
| Slackia                       | -1.52 | 0.09 | 0.41 | -1.45 | 0.10 | 0.61 | -1.40 | 0.13 | 0.91 | -1.21 | 0.18 | 0.99 | -1.44 | 0.11 | 0.97 |
| Streptococcus                 | 0.77  | 0.54 | 0.81 | 0.82  | 0.50 | 0.88 | 0.16  | 0.90 | 0.99 | 0.27  | 0.83 | 1.00 | 0.84  | 0.52 | 0.97 |
| Subdoligranulum               | 1.78  | 0.05 | 0.38 | 1.49  | 0.09 | 0.61 | 0.73  | 0.44 | 0.94 | 0.79  | 0.40 | 0.99 | 0.83  | 0.38 | 0.97 |
| Sutterella                    | -0.96 | 0.08 | 0.41 | -0.64 | 0.24 | 0.75 | -0.66 | 0.24 | 0.93 | -0.61 | 0.27 | 0.99 | -0.51 | 0.37 | 0.97 |
| TM7x                          | 1.50  | 0.24 | 0.63 | 1.11  | 0.37 | 0.82 | 0.96  | 0.45 | 0.94 | 1.00  | 0.43 | 0.99 | 1.64  | 0.20 | 0.97 |
| Turicibacter                  | 0.45  | 0.75 | 0.91 | 0.60  | 0.67 | 0.92 | 0.62  | 0.66 | 0.99 | 0.55  | 0.70 | 1.00 | 0.23  | 0.87 | 0.98 |
| Tuzzerella                    | -1.13 | 0.19 | 0.60 | -0.90 | 0.29 | 0.75 | -0.69 | 0.45 | 0.94 | -0.85 | 0.35 | 0.99 | -0.92 | 0.31 | 0.97 |
| UBA1819                       | 1.47  | 0.27 | 0.64 | 1.46  | 0.26 | 0.75 | 2.01  | 0.14 | 0.91 | 1.56  | 0.26 | 0.99 | 1.25  | 0.38 | 0.97 |
| UCG.002                       | 1.07  | 0.09 | 0.41 | 0.83  | 0.18 | 0.68 | 0.57  | 0.40 | 0.94 | 0.48  | 0.48 | 0.99 | 0.56  | 0.41 | 0.97 |
| UCG.003                       | 0.58  | 0.44 | 0.76 | 0.32  | 0.66 | 0.92 | 0.01  | 0.99 | 1.00 | 0.06  | 0.94 | 1.00 | 0.15  | 0.85 | 0.97 |
| UCG.005                       | 1.46  | 0.07 | 0.40 | 1.10  | 0.17 | 0.68 | 0.41  | 0.64 | 0.98 | 0.25  | 0.77 | 1.00 | 0.27  | 0.75 | 0.97 |
| UCG.009                       | 0.29  | 0.82 | 0.95 | -0.53 | 0.68 | 0.92 | -0.75 | 0.57 | 0.96 | -0.86 | 0.51 | 0.99 | -0.78 | 0.55 | 0.97 |
| Veillonella                   | 0.43  | 0.65 | 0.88 | 0.30  | 0.75 | 0.94 | 0.04  | 0.97 | 0.99 | 0.22  | 0.82 | 1.00 | 0.67  | 0.51 | 0.97 |

Multivariable-adjusted regression models adjusted for:

Model 1: sequencing batch, age, race, gender, study center

Model 2: Model 1, with education

Model 3: Model 2, with physical activity, diet score, medication use, and smoking

Model 4: Model 3 with BMI

Model 5: Model 4 with hypertension and diabetes



eTable 55: Multivariable-adjusted regression coefficients, p-values, and false discovery rate (FDR)-adjusted p-values for genera among female participants with respect to Stroop.

|                               | Model1 |         |      | Model2 |         |      | Model3 |         |      | Model4 |         |      | Model5 |         |      |
|-------------------------------|--------|---------|------|--------|---------|------|--------|---------|------|--------|---------|------|--------|---------|------|
|                               | beta   | p-value | FDR  | beta   | p-value | FDR  | beta   | p-value | FDR  | beta   | p-value | FDR  | beta   | p-value | FDR  |
| Acetanaerobacterium           | -0.27  | 0.81    | 0.90 | -0.47  | 0.69    | 0.83 | -0.43  | 0.73    | 0.85 | -0.29  | 0.81    | 0.91 | -0.41  | 0.75    | 0.87 |
| Acidaminococcus               | 0.45   | 0.26    | 0.53 | 0.36   | 0.38    | 0.66 | 0.22   | 0.62    | 0.82 | 0.21   | 0.63    | 0.84 | 0.24   | 0.59    | 0.79 |
| Actinomyces                   | -0.19  | 0.86    | 0.94 | -0.30  | 0.77    | 0.86 | -0.71  | 0.53    | 0.75 | -0.83  | 0.47    | 0.73 | -0.86  | 0.45    | 0.71 |
| Adlercreutzia                 | -1.60  | 0.01    | 0.14 | -1.53  | 0.02    | 0.18 | -1.45  | 0.04    | 0.30 | -1.37  | 0.05    | 0.32 | -1.35  | 0.06    | 0.30 |
| Agathobacter                  | 0.26   | 0.72    | 0.85 | 0.24   | 0.75    | 0.86 | 0.42   | 0.60    | 0.81 | 0.31   | 0.69    | 0.84 | 0.27   | 0.74    | 0.87 |
| Akkermansia                   | -1.03  | 0.01    | 0.09 | -1.00  | 0.01    | 0.13 | -0.95  | 0.02    | 0.24 | -0.92  | 0.03    | 0.29 | -0.93  | 0.03    | 0.24 |
| Alistipes                     | -0.58  | 0.36    | 0.64 | -0.58  | 0.36    | 0.64 | -0.53  | 0.43    | 0.70 | -0.51  | 0.45    | 0.71 | -0.51  | 0.46    | 0.71 |
| Anaerofilum                   | -1.73  | 0.05    | 0.21 | -1.53  | 0.08    | 0.29 | -1.68  | 0.07    | 0.31 | -1.58  | 0.09    | 0.39 | -1.79  | 0.06    | 0.30 |
| Anaerostipes                  | 0.31   | 0.74    | 0.85 | 0.36   | 0.69    | 0.83 | 0.37   | 0.70    | 0.85 | 0.40   | 0.68    | 0.84 | 0.41   | 0.68    | 0.86 |
| Anaerotruncus                 | -1.58  | 0.05    | 0.21 | -1.54  | 0.06    | 0.26 | -1.66  | 0.06    | 0.30 | -1.50  | 0.09    | 0.39 | -1.59  | 0.08    | 0.34 |
| Angelakisella                 | -1.55  | 0.18    | 0.42 | -1.41  | 0.22    | 0.50 | -1.49  | 0.24    | 0.57 | -1.37  | 0.29    | 0.64 | -1.47  | 0.26    | 0.56 |
| Bacteroides                   | -3.58  | 0.03    | 0.19 | -3.43  | 0.03    | 0.24 | -3.28  | 0.05    | 0.30 | -3.45  | 0.04    | 0.31 | -3.58  | 0.03    | 0.24 |
| Barnesiella                   | -0.84  | 0.02    | 0.19 | -0.84  | 0.02    | 0.20 | -0.95  | 0.02    | 0.23 | -0.95  | 0.02    | 0.29 | -1.06  | 0.01    | 0.23 |
| Bifidobacterium               | -0.06  | 0.90    | 0.98 | -0.16  | 0.76    | 0.86 | -0.09  | 0.87    | 0.92 | -0.09  | 0.87    | 0.94 | -0.08  | 0.88    | 0.94 |
| Bilophila                     | -0.60  | 0.23    | 0.50 | -0.61  | 0.22    | 0.50 | -0.55  | 0.30    | 0.60 | -0.53  | 0.32    | 0.64 | -0.50  | 0.35    | 0.66 |
| Blautia                       | -1.86  | 0.29    | 0.58 | -1.88  | 0.28    | 0.57 | -2.48  | 0.17    | 0.49 | -2.39  | 0.19    | 0.55 | -2.93  | 0.13    | 0.47 |
| Butyricoccus                  | -0.87  | 0.45    | 0.69 | -0.66  | 0.57    | 0.80 | -0.30  | 0.81    | 0.90 | -0.41  | 0.74    | 0.87 | -0.27  | 0.83    | 0.91 |
| Butyricimonas                 | -1.24  | 0.00    | 0.09 | -1.21  | 0.00    | 0.12 | -1.11  | 0.02    | 0.23 | -1.16  | 0.01    | 0.29 | -1.15  | 0.01    | 0.23 |
| CAG.56                        | -0.60  | 0.25    | 0.52 | -0.57  | 0.28    | 0.57 | -0.44  | 0.44    | 0.70 | -0.46  | 0.43    | 0.71 | -0.59  | 0.31    | 0.61 |
| Candidatus_Soleaferrea        | -0.85  | 0.43    | 0.69 | -0.85  | 0.43    | 0.70 | -1.16  | 0.31    | 0.61 | -1.12  | 0.33    | 0.64 | -1.26  | 0.28    | 0.58 |
| Caproiciproducens             | -1.33  | 0.12    | 0.34 | -1.35  | 0.11    | 0.35 | -1.20  | 0.19    | 0.51 | -1.12  | 0.22    | 0.56 | -1.14  | 0.22    | 0.54 |
| Christensenellaceae_R.7_group | -1.24  | 0.00    | 0.09 | -1.18  | 0.01    | 0.12 | -1.16  | 0.02    | 0.23 | -1.09  | 0.02    | 0.29 | -1.19  | 0.02    | 0.23 |
| Clostridium_sensu_stricto_1   | 0.45   | 0.44    | 0.69 | 0.46   | 0.43    | 0.70 | 0.47   | 0.43    | 0.70 | 0.47   | 0.44    | 0.71 | 0.47   | 0.44    | 0.71 |
| Colidextribacter              | -0.99  | 0.38    | 0.65 | -0.94  | 0.40    | 0.68 | -1.32  | 0.28    | 0.59 | -1.19  | 0.33    | 0.64 | -1.62  | 0.20    | 0.53 |
| Collinsella                   | 0.36   | 0.44    | 0.69 | 0.21   | 0.66    | 0.83 | 0.17   | 0.73    | 0.85 | 0.11   | 0.83    | 0.92 | 0.12   | 0.82    | 0.91 |
| Coprobacter                   | 0.32   | 0.55    | 0.76 | 0.40   | 0.46    | 0.73 | 0.45   | 0.44    | 0.70 | 0.48   | 0.41    | 0.71 | 0.45   | 0.45    | 0.71 |
| Coprococcus                   | 0.34   | 0.53    | 0.75 | 0.25   | 0.64    | 0.83 | 0.11   | 0.85    | 0.92 | 0.09   | 0.88    | 0.94 | -0.01  | 0.98    | 0.98 |
| Defluviitaleaceae_UCG.011     | -2.29  | 0.00    | 0.09 | -2.19  | 0.01    | 0.12 | -2.23  | 0.01    | 0.23 | -2.12  | 0.02    | 0.29 | -2.17  | 0.02    | 0.23 |
| Desulfovibrio                 | 0.01   | 0.99    | 0.99 | -0.01  | 0.98    | 0.99 | 0.02   | 0.97    | 0.98 | 0.05   | 0.93    | 0.96 | -0.02  | 0.98    | 0.98 |
| Dialister                     | 0.34   | 0.36    | 0.64 | 0.35   | 0.35    | 0.64 | 0.48   | 0.24    | 0.57 | 0.47   | 0.25    | 0.59 | 0.42   | 0.31    | 0.61 |
| DNF00809                      | -0.53  | 0.56    | 0.76 | -0.52  | 0.57    | 0.80 | -0.66  | 0.50    | 0.73 | -0.63  | 0.52    | 0.76 | -0.63  | 0.52    | 0.76 |
| Dorea                         | -0.52  | 0.46    | 0.69 | -0.62  | 0.38    | 0.66 | -0.62  | 0.41    | 0.70 | -0.71  | 0.34    | 0.64 | -0.67  | 0.37    | 0.66 |
| DTU089                        | -0.91  | 0.24    | 0.51 | -0.86  | 0.26    | 0.56 | -0.93  | 0.25    | 0.57 | -0.90  | 0.27    | 0.61 | -1.02  | 0.21    | 0.54 |
| Eggerthella                   | 0.05   | 0.95    | 0.98 | 0.06   | 0.93    | 0.98 | -0.08  | 0.91    | 0.95 | 0.00   | 1.00    | 1.00 | -0.11  | 0.89    | 0.94 |
| Eisenbergiella                | -1.12  | 0.11    | 0.33 | -1.11  | 0.11    | 0.36 | -1.30  | 0.08    | 0.31 | -1.17  | 0.11    | 0.44 | -1.16  | 0.12    | 0.47 |
| Erysipelatoclostridium        | -1.46  | 0.06    | 0.21 | -1.45  | 0.06    | 0.26 | -1.50  | 0.07    | 0.31 | -1.41  | 0.09    | 0.39 | -1.45  | 0.08    | 0.35 |
| Erysipelotrichaceae_UCG.003   | -1.08  | 0.05    | 0.21 | -1.06  | 0.06    | 0.26 | -0.91  | 0.13    | 0.42 | -0.88  | 0.15    | 0.49 | -0.95  | 0.12    | 0.47 |
| Escherichia_Shigella          | 0.04   | 0.94    | 0.98 | 0.00   | 1.00    | 1.00 | -0.12  | 0.83    | 0.92 | -0.15  | 0.79    | 0.90 | -0.14  | 0.80    | 0.90 |
| Faecalibacterium              | -1.17  | 0.09    | 0.29 | -1.05  | 0.13    | 0.36 | -0.83  | 0.26    | 0.57 | -0.90  | 0.22    | 0.56 | -0.98  | 0.20    | 0.53 |
| Family_XIII_AD3011_group      | -1.32  | 0.06    | 0.21 | -1.25  | 0.07    | 0.28 | -1.07  | 0.17    | 0.49 | -0.99  | 0.20    | 0.55 | -1.00  | 0.21    | 0.53 |
| Family_XIII_UCG.001           | -1.64  | 0.06    | 0.21 | -1.57  | 0.08    | 0.28 | -1.59  | 0.10    | 0.37 | -1.49  | 0.12    | 0.44 | -1.48  | 0.13    | 0.47 |
| Flavonifractor                | -0.33  | 0.67    | 0.82 | -0.32  | 0.68    | 0.83 | -0.45  | 0.59    | 0.81 | -0.45  | 0.59    | 0.81 | -0.54  | 0.52    | 0.76 |
| Frasingicoccus                | -0.82  | 0.15    | 0.38 | -0.72  | 0.21    | 0.50 | -0.58  | 0.34    | 0.65 | -0.49  | 0.43    | 0.71 | -0.51  | 0.41    | 0.69 |
| Fusicatenibacter              | -0.30  | 0.57    | 0.76 | -0.25  | 0.65    | 0.83 | -0.47  | 0.43    | 0.70 | -0.59  | 0.33    | 0.64 | -0.56  | 0.36    | 0.66 |
| Fusobacterium                 | 1.71   | 0.06    | 0.21 | 1.64   | 0.07    | 0.28 | 1.49   | 0.13    | 0.42 | 1.58   | 0.11    | 0.44 | 1.50   | 0.14    | 0.47 |
| GCA.900066575                 | -1.31  | 0.10    | 0.32 | -1.17  | 0.14    | 0.38 | -0.84  | 0.33    | 0.64 | -0.73  | 0.40    | 0.70 | -0.97  | 0.28    | 0.58 |
| GCA.900066755                 | -1.02  | 0.41    | 0.68 | -1.05  | 0.40    | 0.68 | -1.48  | 0.26    | 0.57 | -1.28  | 0.33    | 0.64 | -1.58  | 0.24    | 0.56 |
| Gordonibacter                 | -1.07  | 0.16    | 0.39 | -1.02  | 0.18    | 0.46 | -0.70  | 0.39    | 0.70 | -0.56  | 0.49    | 0.74 | -0.54  | 0.52    | 0.76 |
| Granulicatella                | -0.05  | 0.96    | 0.98 | -0.05  | 0.96    | 0.99 | 0.02   | 0.98    | 0.98 | -0.08  | 0.94    | 0.96 | -0.12  | 0.91    | 0.94 |
| Haemophilus                   | 0.14   | 0.82    | 0.90 | 0.23   | 0.71    | 0.84 | 0.46   | 0.48    | 0.73 | 0.47   | 0.47    | 0.73 | 0.33   | 0.61    | 0.80 |
| Harryflintia                  | -1.64  | 0.06    | 0.21 | -1.65  | 0.06    | 0.26 | -1.89  | 0.04    | 0.30 | -1.78  | 0.06    | 0.32 | -2.07  | 0.03    | 0.24 |
| Holdemania                    | -2.02  | 0.13    | 0.34 | -1.99  | 0.13    | 0.36 | -2.29  | 0.10    | 0.37 | -2.19  | 0.12    | 0.44 | -2.37  | 0.10    | 0.41 |

|                               |       |      |      |       |      |      |       |      |      |       |      |      |       |      |      |
|-------------------------------|-------|------|------|-------|------|------|-------|------|------|-------|------|------|-------|------|------|
| Hungatella                    | -0.29 | 0.67 | 0.82 | -0.34 | 0.62 | 0.83 | -0.91 | 0.21 | 0.56 | -0.90 | 0.22 | 0.56 | -0.86 | 0.24 | 0.56 |
| Hydrogenoanaerobacterium      | -1.33 | 0.06 | 0.21 | -1.21 | 0.09 | 0.30 | -1.27 | 0.10 | 0.37 | -1.12 | 0.15 | 0.49 | -1.17 | 0.14 | 0.47 |
| Incertae_Sedis                | -1.42 | 0.22 | 0.49 | -1.42 | 0.22 | 0.50 | -1.30 | 0.29 | 0.60 | -1.24 | 0.32 | 0.64 | -1.41 | 0.26 | 0.56 |
| Intestinibacter               | -0.34 | 0.64 | 0.82 | -0.39 | 0.58 | 0.80 | -0.32 | 0.68 | 0.83 | -0.43 | 0.57 | 0.81 | -0.49 | 0.53 | 0.76 |
| Intestinimonas                | -1.77 | 0.00 | 0.09 | -1.72 | 0.01 | 0.12 | -1.68 | 0.01 | 0.23 | -1.56 | 0.02 | 0.29 | -1.62 | 0.02 | 0.24 |
| Lachnoclostridium             | 2.60  | 0.05 | 0.21 | 2.36  | 0.08 | 0.29 | 2.00  | 0.17 | 0.49 | 1.90  | 0.20 | 0.55 | 2.08  | 0.16 | 0.50 |
| Lachnospira                   | -1.00 | 0.13 | 0.34 | -0.84 | 0.20 | 0.50 | -0.79 | 0.27 | 0.58 | -0.87 | 0.23 | 0.56 | -1.06 | 0.15 | 0.49 |
| Lachnospiraceae_FCS020_group  | -1.47 | 0.04 | 0.21 | -1.31 | 0.07 | 0.28 | -0.98 | 0.22 | 0.56 | -1.01 | 0.20 | 0.55 | -0.95 | 0.24 | 0.56 |
| Lachnospiraceae_ND3007_group  | 0.18  | 0.70 | 0.82 | 0.26  | 0.58 | 0.80 | 0.36  | 0.48 | 0.73 | 0.29  | 0.57 | 0.81 | 0.21  | 0.69 | 0.86 |
| Lachnospiraceae_NK4A136_group | 0.63  | 0.37 | 0.64 | 0.80  | 0.26 | 0.56 | 1.19  | 0.13 | 0.42 | 1.13  | 0.15 | 0.49 | 1.01  | 0.21 | 0.53 |
| Lachnospiraceae_UCG.001       | -0.21 | 0.69 | 0.82 | -0.17 | 0.74 | 0.86 | -0.06 | 0.91 | 0.95 | 0.01  | 0.99 | 1.00 | -0.07 | 0.90 | 0.94 |
| Lachnospiraceae_UCG.004       | 0.33  | 0.53 | 0.75 | 0.37  | 0.48 | 0.74 | 0.47  | 0.41 | 0.70 | 0.43  | 0.45 | 0.71 | 0.41  | 0.48 | 0.74 |
| Lachnospiraceae_UCG.010       | 0.02  | 0.98 | 0.99 | 0.15  | 0.85 | 0.91 | 0.27  | 0.75 | 0.86 | 0.32  | 0.71 | 0.84 | 0.28  | 0.74 | 0.87 |
| Lactobacillus                 | 0.78  | 0.21 | 0.49 | 0.64  | 0.31 | 0.61 | 0.53  | 0.45 | 0.70 | 0.38  | 0.58 | 0.81 | 0.47  | 0.51 | 0.76 |
| Lactococcus                   | 0.36  | 0.69 | 0.82 | 0.37  | 0.68 | 0.83 | 0.44  | 0.65 | 0.83 | 0.49  | 0.62 | 0.82 | 0.60  | 0.55 | 0.76 |
| Marvinbryantia                | 0.53  | 0.31 | 0.59 | 0.58  | 0.27 | 0.57 | 0.57  | 0.32 | 0.62 | 0.57  | 0.32 | 0.64 | 0.48  | 0.41 | 0.69 |
| Megasphaera                   | 0.26  | 0.61 | 0.79 | 0.15  | 0.77 | 0.86 | -0.25 | 0.65 | 0.83 | -0.28 | 0.61 | 0.82 | -0.20 | 0.73 | 0.87 |
| Monoglobus                    | -2.48 | 0.00 | 0.04 | -2.43 | 0.00 | 0.05 | -2.28 | 0.00 | 0.14 | -2.26 | 0.00 | 0.22 | -2.49 | 0.00 | 0.14 |
| Moryella                      | -0.58 | 0.53 | 0.75 | -0.43 | 0.65 | 0.83 | -0.05 | 0.96 | 0.98 | -0.13 | 0.90 | 0.95 | -0.29 | 0.78 | 0.88 |
| Negativibacillus              | -0.75 | 0.17 | 0.41 | -0.83 | 0.13 | 0.36 | -1.17 | 0.05 | 0.30 | -1.14 | 0.05 | 0.32 | -1.21 | 0.05 | 0.29 |
| NK4A214_group                 | -0.95 | 0.03 | 0.20 | -0.91 | 0.04 | 0.24 | -0.97 | 0.04 | 0.30 | -0.93 | 0.05 | 0.32 | -1.03 | 0.03 | 0.24 |
| Odoribacter                   | -0.33 | 0.44 | 0.69 | -0.28 | 0.51 | 0.75 | -0.19 | 0.68 | 0.83 | -0.18 | 0.70 | 0.84 | -0.25 | 0.60 | 0.79 |
| Oscillibacter                 | -2.00 | 0.01 | 0.09 | -1.93 | 0.01 | 0.12 | -1.87 | 0.02 | 0.23 | -1.76 | 0.03 | 0.29 | -1.81 | 0.02 | 0.24 |
| Oscillospira                  | -2.10 | 0.04 | 0.21 | -2.15 | 0.03 | 0.24 | -2.29 | 0.03 | 0.30 | -2.27 | 0.03 | 0.31 | -2.70 | 0.02 | 0.23 |
| Oxalobacter                   | -0.34 | 0.65 | 0.82 | -0.13 | 0.87 | 0.92 | 0.35  | 0.67 | 0.83 | 0.37  | 0.66 | 0.84 | 0.52  | 0.54 | 0.76 |
| Paludicola                    | -1.56 | 0.04 | 0.21 | -1.49 | 0.05 | 0.26 | -1.33 | 0.11 | 0.38 | -1.19 | 0.16 | 0.49 | -1.15 | 0.18 | 0.52 |
| Parabacteroides               | -0.31 | 0.57 | 0.76 | -0.37 | 0.50 | 0.75 | -0.39 | 0.50 | 0.73 | -0.52 | 0.37 | 0.68 | -0.57 | 0.33 | 0.64 |
| Paraprevotella                | 0.81  | 0.06 | 0.21 | 0.79  | 0.06 | 0.27 | 0.89  | 0.05 | 0.30 | 0.90  | 0.05 | 0.32 | 0.87  | 0.06 | 0.30 |
| Parasutterella                | -0.84 | 0.04 | 0.21 | -0.80 | 0.05 | 0.26 | -0.81 | 0.07 | 0.31 | -0.83 | 0.06 | 0.32 | -0.85 | 0.06 | 0.30 |
| Peptococcus                   | -0.62 | 0.47 | 0.70 | -0.53 | 0.55 | 0.79 | -0.45 | 0.64 | 0.83 | -0.39 | 0.68 | 0.84 | -0.36 | 0.71 | 0.87 |
| Phascolarctobacterium         | -0.58 | 0.14 | 0.35 | -0.61 | 0.12 | 0.36 | -0.67 | 0.11 | 0.37 | -0.63 | 0.13 | 0.46 | -0.57 | 0.18 | 0.52 |
| Phocea                        | 0.89  | 0.36 | 0.64 | 0.92  | 0.34 | 0.64 | 1.17  | 0.26 | 0.57 | 1.08  | 0.30 | 0.64 | 0.89  | 0.40 | 0.68 |
| Prevotella                    | 1.04  | 0.01 | 0.09 | 0.97  | 0.01 | 0.16 | 0.97  | 0.02 | 0.23 | 0.94  | 0.02 | 0.29 | 0.93  | 0.03 | 0.24 |
| Romboutsia                    | -0.48 | 0.47 | 0.69 | -0.52 | 0.43 | 0.70 | -0.53 | 0.45 | 0.70 | -0.60 | 0.39 | 0.70 | -0.69 | 0.34 | 0.65 |
| Roseburia                     | 0.22  | 0.76 | 0.87 | 0.20  | 0.77 | 0.86 | 0.29  | 0.71 | 0.85 | 0.20  | 0.79 | 0.90 | 0.10  | 0.90 | 0.94 |
| Ruminococcus                  | -0.53 | 0.26 | 0.53 | -0.44 | 0.36 | 0.64 | -0.45 | 0.38 | 0.70 | -0.44 | 0.39 | 0.70 | -0.48 | 0.36 | 0.66 |
| Sellimonas                    | -0.60 | 0.39 | 0.66 | -0.47 | 0.50 | 0.75 | -0.40 | 0.59 | 0.81 | -0.28 | 0.71 | 0.84 | -0.37 | 0.63 | 0.80 |
| Shuttleworthia                | -1.57 | 0.02 | 0.14 | -1.40 | 0.04 | 0.24 | -1.05 | 0.15 | 0.45 | -0.97 | 0.19 | 0.55 | -1.01 | 0.18 | 0.52 |
| Slackia                       | 0.05  | 0.94 | 0.98 | 0.02  | 0.97 | 0.99 | -0.02 | 0.97 | 0.98 | -0.11 | 0.86 | 0.94 | -0.08 | 0.90 | 0.94 |
| Streptococcus                 | -1.27 | 0.13 | 0.34 | -1.28 | 0.12 | 0.36 | -1.65 | 0.07 | 0.31 | -1.70 | 0.06 | 0.32 | -1.70 | 0.07 | 0.31 |
| Subdoligranulum               | -1.26 | 0.04 | 0.21 | -1.18 | 0.05 | 0.26 | -1.32 | 0.04 | 0.30 | -1.35 | 0.04 | 0.31 | -1.54 | 0.02 | 0.24 |
| Sutterella                    | 0.57  | 0.12 | 0.34 | 0.49  | 0.18 | 0.46 | 0.46  | 0.24 | 0.57 | 0.44  | 0.26 | 0.61 | 0.46  | 0.26 | 0.56 |
| TM7x                          | -0.86 | 0.31 | 0.59 | -0.78 | 0.36 | 0.64 | -0.59 | 0.51 | 0.73 | -0.61 | 0.49 | 0.74 | -0.80 | 0.38 | 0.67 |
| Turicibacter                  | 0.11  | 0.91 | 0.98 | 0.06  | 0.95 | 0.99 | 0.35  | 0.73 | 0.85 | 0.37  | 0.71 | 0.84 | 0.41  | 0.69 | 0.86 |
| Tuzzerella                    | -0.26 | 0.65 | 0.82 | -0.32 | 0.59 | 0.80 | -0.11 | 0.86 | 0.92 | -0.05 | 0.94 | 0.96 | -0.03 | 0.97 | 0.98 |
| UBA1819                       | -2.36 | 0.01 | 0.09 | -2.35 | 0.01 | 0.12 | -2.88 | 0.00 | 0.14 | -2.74 | 0.00 | 0.22 | -2.98 | 0.00 | 0.14 |
| UCG.002                       | -0.25 | 0.55 | 0.76 | -0.18 | 0.66 | 0.83 | -0.10 | 0.84 | 0.92 | -0.06 | 0.91 | 0.95 | -0.15 | 0.76 | 0.88 |
| UCG.003                       | 0.03  | 0.95 | 0.98 | 0.09  | 0.85 | 0.91 | 0.15  | 0.78 | 0.89 | 0.13  | 0.81 | 0.91 | 0.16  | 0.77 | 0.88 |
| UCG.005                       | -1.40 | 0.01 | 0.11 | -1.31 | 0.02 | 0.16 | -1.13 | 0.06 | 0.31 | -1.07 | 0.07 | 0.36 | -1.20 | 0.05 | 0.30 |
| UCG.009                       | -0.80 | 0.36 | 0.64 | -0.61 | 0.48 | 0.74 | -0.46 | 0.62 | 0.82 | -0.42 | 0.65 | 0.84 | -0.55 | 0.56 | 0.76 |
| Veillonella                   | 0.15  | 0.81 | 0.90 | 0.18  | 0.78 | 0.86 | 0.46  | 0.51 | 0.73 | 0.38  | 0.58 | 0.81 | 0.38  | 0.59 | 0.79 |

Multivariable-adjusted regression models adjusted for:

Model 1: sequencing batch, age, race, gender, study center

Model 2: Model 1, with education

Model 3: Model 2, with physical activity, diet score, medication use, and smoking

Model 4: Model 3 with BMI

Model 5: Model 4 with hypertension and diabetes

eTable 56: Multivariable-adjusted regression coefficients, p-values, and false discovery rate (FDR)-adjusted p-values for genera among female participants with respect to RAVLT.

|                               | Model1 |         |      | Model2 |         |      | Model3 |         |      | Model4 |         |      | Model5 |         |      |
|-------------------------------|--------|---------|------|--------|---------|------|--------|---------|------|--------|---------|------|--------|---------|------|
|                               | beta   | p-value | FDR  | beta   | p-value | FDR  | beta   | p-value | FDR  | beta   | p-value | FDR  | beta   | p-value | FDR  |
| Acetanaerobacterium           | -0.05  | 0.79    | 0.95 | 0.05   | 0.78    | 0.95 | -0.05  | 0.81    | 0.93 | -0.07  | 0.72    | 0.91 | -0.10  | 0.60    | 0.91 |
| Acidaminococcus               | -0.10  | 0.12    | 0.44 | -0.06  | 0.37    | 0.78 | -0.02  | 0.76    | 0.92 | -0.02  | 0.77    | 0.91 | -0.02  | 0.76    | 0.92 |
| Actinomyces                   | -0.08  | 0.65    | 0.89 | -0.02  | 0.88    | 0.98 | -0.01  | 0.94    | 0.99 | 0.00   | 1.00    | 1.00 | 0.03   | 0.85    | 0.93 |
| Adlercreutzia                 | 0.21   | 0.05    | 0.40 | 0.17   | 0.10    | 0.66 | 0.13   | 0.23    | 0.87 | 0.12   | 0.28    | 0.89 | 0.11   | 0.34    | 0.91 |
| Agathobacter                  | -0.19  | 0.12    | 0.44 | -0.18  | 0.14    | 0.66 | -0.19  | 0.14    | 0.87 | -0.17  | 0.18    | 0.89 | -0.16  | 0.21    | 0.91 |
| Akkermansia                   | 0.09   | 0.16    | 0.48 | 0.07   | 0.24    | 0.71 | 0.06   | 0.38    | 0.87 | 0.05   | 0.42    | 0.89 | 0.05   | 0.47    | 0.91 |
| Alistipes                     | 0.13   | 0.22    | 0.54 | 0.13   | 0.20    | 0.66 | 0.06   | 0.55    | 0.87 | 0.06   | 0.57    | 0.89 | 0.05   | 0.63    | 0.91 |
| Anaerofilum                   | 0.27   | 0.07    | 0.42 | 0.15   | 0.30    | 0.78 | 0.14   | 0.36    | 0.87 | 0.12   | 0.42    | 0.89 | 0.15   | 0.31    | 0.91 |
| Anaerostipes                  | -0.09  | 0.54    | 0.87 | -0.12  | 0.43    | 0.79 | -0.15  | 0.34    | 0.87 | -0.15  | 0.32    | 0.89 | -0.16  | 0.29    | 0.91 |
| Anaerotruncus                 | 0.03   | 0.85    | 0.96 | 0.00   | 0.98    | 0.99 | -0.09  | 0.52    | 0.87 | -0.12  | 0.39    | 0.89 | -0.13  | 0.35    | 0.91 |
| Angelakisella                 | 0.24   | 0.22    | 0.54 | 0.16   | 0.39    | 0.78 | 0.13   | 0.52    | 0.87 | 0.11   | 0.59    | 0.89 | 0.09   | 0.65    | 0.91 |
| Bacteroides                   | -0.27  | 0.32    | 0.67 | -0.34  | 0.20    | 0.66 | -0.29  | 0.28    | 0.87 | -0.27  | 0.31    | 0.89 | -0.24  | 0.38    | 0.91 |
| Barnesiella                   | 0.11   | 0.09    | 0.44 | 0.10   | 0.10    | 0.66 | 0.07   | 0.30    | 0.87 | 0.07   | 0.30    | 0.89 | 0.08   | 0.21    | 0.91 |
| Bifidobacterium               | 0.00   | 0.99    | 1.00 | 0.05   | 0.55    | 0.88 | 0.03   | 0.73    | 0.92 | 0.03   | 0.73    | 0.91 | 0.02   | 0.80    | 0.92 |
| Bifophila                     | 0.13   | 0.11    | 0.44 | 0.14   | 0.09    | 0.66 | 0.12   | 0.16    | 0.87 | 0.11   | 0.17    | 0.89 | 0.10   | 0.21    | 0.91 |
| Blautia                       | -0.21  | 0.47    | 0.79 | -0.20  | 0.49    | 0.86 | -0.12  | 0.69    | 0.92 | -0.13  | 0.65    | 0.90 | -0.10  | 0.74    | 0.92 |
| Butyricoccus                  | 0.06   | 0.75    | 0.95 | -0.04  | 0.82    | 0.96 | -0.13  | 0.49    | 0.87 | -0.12  | 0.54    | 0.89 | -0.14  | 0.48    | 0.91 |
| Butyricimonas                 | 0.11   | 0.13    | 0.44 | 0.09   | 0.20    | 0.66 | 0.09   | 0.20    | 0.87 | 0.10   | 0.17    | 0.89 | 0.09   | 0.21    | 0.91 |
| CAG.56                        | -0.01  | 0.86    | 0.97 | -0.03  | 0.71    | 0.92 | -0.08  | 0.38    | 0.87 | -0.08  | 0.40    | 0.89 | -0.05  | 0.55    | 0.91 |
| Candidatus_Soleaferrea        | -0.01  | 0.94    | 0.98 | -0.02  | 0.89    | 0.98 | 0.02   | 0.89    | 0.95 | 0.02   | 0.92    | 0.96 | 0.00   | 0.98    | 0.98 |
| Caproiciproducens             | 0.16   | 0.26    | 0.59 | 0.18   | 0.19    | 0.66 | 0.11   | 0.46    | 0.87 | 0.09   | 0.51    | 0.89 | 0.08   | 0.59    | 0.91 |
| Christensenellaceae_R.7_group | 0.14   | 0.05    | 0.40 | 0.10   | 0.14    | 0.66 | 0.04   | 0.59    | 0.89 | 0.03   | 0.69    | 0.91 | 0.04   | 0.61    | 0.91 |
| Clostridium_sensu_stricto_1   | 0.18   | 0.06    | 0.42 | 0.17   | 0.07    | 0.66 | 0.15   | 0.12    | 0.87 | 0.15   | 0.12    | 0.89 | 0.14   | 0.15    | 0.91 |
| Colidextribacter              | -0.27  | 0.15    | 0.47 | -0.29  | 0.11    | 0.66 | -0.36  | 0.06    | 0.87 | -0.39  | 0.04    | 0.89 | -0.37  | 0.07    | 0.91 |
| Collinsella                   | -0.20  | 0.01    | 0.31 | -0.13  | 0.10    | 0.66 | -0.11  | 0.18    | 0.87 | -0.10  | 0.22    | 0.89 | -0.10  | 0.23    | 0.91 |
| Coprobacter                   | -0.04  | 0.67    | 0.89 | -0.08  | 0.36    | 0.78 | -0.12  | 0.18    | 0.87 | -0.13  | 0.17    | 0.89 | -0.12  | 0.20    | 0.91 |
| Coprococcus                   | -0.08  | 0.37    | 0.72 | -0.04  | 0.62    | 0.88 | -0.07  | 0.47    | 0.87 | -0.06  | 0.50    | 0.89 | -0.04  | 0.67    | 0.91 |
| Defluviitaleaceae_UCG.011     | 0.23   | 0.09    | 0.44 | 0.17   | 0.19    | 0.66 | 0.09   | 0.50    | 0.87 | 0.07   | 0.60    | 0.89 | 0.04   | 0.79    | 0.92 |
| Desulfovibrio                 | -0.04  | 0.62    | 0.87 | -0.03  | 0.72    | 0.92 | -0.07  | 0.43    | 0.87 | -0.07  | 0.40    | 0.89 | -0.07  | 0.43    | 0.91 |
| Dialister                     | -0.05  | 0.45    | 0.79 | -0.05  | 0.42    | 0.78 | -0.07  | 0.27    | 0.87 | -0.07  | 0.28    | 0.89 | -0.06  | 0.36    | 0.91 |
| DNF00809                      | 0.01   | 0.94    | 0.98 | 0.00   | 0.99    | 0.99 | -0.02  | 0.89    | 0.95 | -0.02  | 0.87    | 0.96 | -0.03  | 0.85    | 0.93 |
| Dorea                         | -0.12  | 0.30    | 0.62 | -0.07  | 0.54    | 0.88 | -0.07  | 0.52    | 0.87 | -0.06  | 0.59    | 0.89 | -0.07  | 0.56    | 0.91 |
| DTU089                        | -0.05  | 0.68    | 0.89 | -0.08  | 0.51    | 0.87 | -0.10  | 0.42    | 0.87 | -0.11  | 0.40    | 0.89 | -0.09  | 0.47    | 0.91 |
| Eggerthella                   | 0.07   | 0.58    | 0.87 | 0.06   | 0.60    | 0.88 | 0.02   | 0.85    | 0.93 | 0.01   | 0.93    | 0.96 | 0.04   | 0.73    | 0.92 |
| Eisenbergiella                | -0.03  | 0.82    | 0.95 | -0.03  | 0.76    | 0.94 | -0.04  | 0.70    | 0.92 | -0.07  | 0.55    | 0.89 | -0.06  | 0.59    | 0.91 |
| Erysipelatoclostridium        | 0.00   | 1.00    | 1.00 | -0.01  | 0.95    | 0.99 | -0.04  | 0.74    | 0.92 | -0.06  | 0.65    | 0.90 | -0.06  | 0.63    | 0.91 |
| Erysipelotrichaceae_UCG.003   | 0.02   | 0.83    | 0.95 | 0.02   | 0.85    | 0.97 | -0.02  | 0.83    | 0.93 | -0.03  | 0.79    | 0.92 | -0.04  | 0.71    | 0.92 |
| Escherichia_Shigella          | 0.01   | 0.94    | 0.98 | 0.03   | 0.74    | 0.93 | 0.04   | 0.63    | 0.92 | 0.05   | 0.59    | 0.89 | 0.06   | 0.53    | 0.91 |
| Faecalibacterium              | 0.16   | 0.17    | 0.50 | 0.09   | 0.40    | 0.78 | 0.07   | 0.53    | 0.87 | 0.08   | 0.47    | 0.89 | 0.08   | 0.49    | 0.91 |
| Family_XIII_AD3011_group      | 0.08   | 0.48    | 0.79 | 0.05   | 0.64    | 0.88 | -0.04  | 0.72    | 0.92 | -0.06  | 0.65    | 0.90 | -0.07  | 0.55    | 0.91 |
| Family_XIII_UCG.001           | 0.22   | 0.13    | 0.44 | 0.19   | 0.17    | 0.66 | 0.13   | 0.38    | 0.87 | 0.12   | 0.44    | 0.89 | 0.10   | 0.52    | 0.91 |
| Flavonifractor                | -0.07  | 0.57    | 0.87 | -0.08  | 0.53    | 0.88 | -0.07  | 0.57    | 0.88 | -0.08  | 0.56    | 0.89 | -0.07  | 0.59    | 0.91 |
| Frisingicoccus                | 0.05   | 0.60    | 0.87 | 0.00   | 0.97    | 0.99 | -0.07  | 0.50    | 0.87 | -0.08  | 0.40    | 0.89 | -0.07  | 0.48    | 0.91 |
| Fusicatenibacter              | -0.04  | 0.66    | 0.89 | -0.07  | 0.41    | 0.78 | -0.07  | 0.43    | 0.87 | -0.06  | 0.53    | 0.89 | -0.07  | 0.44    | 0.91 |
| Fusobacterium                 | -0.25  | 0.11    | 0.44 | -0.22  | 0.15    | 0.66 | -0.10  | 0.54    | 0.87 | -0.11  | 0.48    | 0.89 | -0.12  | 0.46    | 0.91 |
| GCA.900066575                 | 0.02   | 0.88    | 0.97 | -0.05  | 0.68    | 0.90 | -0.15  | 0.29    | 0.87 | -0.17  | 0.23    | 0.89 | -0.18  | 0.21    | 0.91 |
| GCA.900066755                 | 0.26   | 0.22    | 0.54 | 0.27   | 0.17    | 0.66 | 0.24   | 0.25    | 0.87 | 0.21   | 0.32    | 0.89 | 0.25   | 0.23    | 0.91 |
| Gordonibacter                 | 0.34   | 0.01    | 0.31 | 0.31   | 0.01    | 0.66 | 0.21   | 0.10    | 0.87 | 0.19   | 0.14    | 0.89 | 0.19   | 0.14    | 0.91 |
| Granulicatella                | 0.10   | 0.57    | 0.87 | 0.09   | 0.60    | 0.88 | 0.05   | 0.77    | 0.92 | 0.07   | 0.70    | 0.91 | 0.10   | 0.58    | 0.91 |
| Haemophilus                   | 0.13   | 0.21    | 0.54 | 0.08   | 0.41    | 0.78 | 0.04   | 0.69    | 0.92 | 0.04   | 0.70    | 0.91 | 0.06   | 0.54    | 0.91 |
| Harryflintia                  | 0.08   | 0.59    | 0.87 | 0.08   | 0.56    | 0.88 | 0.07   | 0.66    | 0.92 | 0.05   | 0.76    | 0.91 | 0.05   | 0.75    | 0.92 |

|            |       |      |      |       |      |      |       |      |      |       |      |      |       |      |      |
|------------|-------|------|------|-------|------|------|-------|------|------|-------|------|------|-------|------|------|
| Holdemania | 0.24  | 0.28 | 0.60 | 0.22  | 0.31 | 0.78 | 0.15  | 0.51 | 0.87 | 0.13  | 0.55 | 0.89 | 0.09  | 0.70 | 0.92 |
| Hungatella | -0.23 | 0.04 | 0.40 | -0.20 | 0.07 | 0.66 | -0.13 | 0.27 | 0.87 | -0.13 | 0.26 | 0.89 | -0.12 | 0.29 | 0.91 |

|                              |       |      |      |       |      |      |       |      |      |       |      |      |       |      |      |
|------------------------------|-------|------|------|-------|------|------|-------|------|------|-------|------|------|-------|------|------|
| Hydrogenoanaerobacterium     | 0.25  | 0.03 | 0.40 | 0.18  | 0.12 | 0.66 | 0.14  | 0.26 | 0.87 | 0.12  | 0.36 | 0.89 | 0.12  | 0.33 | 0.91 |
| Incertae_Sedis               | 0.03  | 0.87 | 0.97 | 0.03  | 0.88 | 0.98 | -0.07 | 0.73 | 0.92 | -0.08 | 0.70 | 0.91 | -0.07 | 0.73 | 0.92 |
| Intestinibacter              | 0.07  | 0.55 | 0.87 | 0.10  | 0.38 | 0.78 | 0.08  | 0.53 | 0.87 | 0.09  | 0.44 | 0.89 | 0.11  | 0.35 | 0.91 |
| Intestinimonas               | 0.25  | 0.02 | 0.35 | 0.22  | 0.03 | 0.66 | 0.19  | 0.08 | 0.87 | 0.17  | 0.12 | 0.89 | 0.19  | 0.08 | 0.91 |
| Lachnoclostridium            | -0.36 | 0.11 | 0.44 | -0.21 | 0.34 | 0.78 | -0.05 | 0.82 | 0.93 | -0.04 | 0.87 | 0.96 | -0.04 | 0.87 | 0.93 |
| Lachnospira                  | 0.20  | 0.07 | 0.43 | 0.11  | 0.32 | 0.78 | 0.06  | 0.60 | 0.89 | 0.07  | 0.53 | 0.89 | 0.08  | 0.48 | 0.91 |
| Lachnospiraceae_FCS020_group | 0.25  | 0.04 | 0.40 | 0.15  | 0.20 | 0.66 | 0.07  | 0.57 | 0.88 | 0.08  | 0.54 | 0.89 | 0.06  | 0.65 | 0.91 |
| Lachnospiraceae_ND3007_grou  | 0.00  | 0.96 | 0.98 | -0.04 | 0.64 | 0.88 | -0.09 | 0.27 | 0.87 | -0.08 | 0.33 | 0.89 | -0.07 | 0.38 | 0.91 |
| Lachnospiraceae_NK4A136_gro  | -0.03 | 0.83 | 0.95 | -0.10 | 0.37 | 0.78 | -0.21 | 0.09 | 0.87 | -0.20 | 0.11 | 0.89 | -0.19 | 0.12 | 0.91 |
| Lachnospiraceae_UCG.001      | 0.06  | 0.47 | 0.79 | 0.04  | 0.62 | 0.88 | 0.02  | 0.82 | 0.93 | 0.01  | 0.91 | 0.96 | 0.03  | 0.78 | 0.92 |
| Lachnospiraceae_UCG.004      | 0.01  | 0.93 | 0.98 | -0.01 | 0.94 | 0.99 | 0.00  | 0.99 | 0.99 | 0.00  | 0.96 | 0.97 | -0.01 | 0.95 | 0.96 |
| Lachnospiraceae_UCG.010      | -0.19 | 0.16 | 0.48 | -0.25 | 0.05 | 0.66 | -0.26 | 0.05 | 0.87 | -0.27 | 0.05 | 0.89 | -0.26 | 0.05 | 0.91 |
| Lactobacillus                | -0.16 | 0.12 | 0.44 | -0.09 | 0.36 | 0.78 | -0.12 | 0.27 | 0.87 | -0.10 | 0.36 | 0.89 | -0.09 | 0.42 | 0.91 |
| Lactococcus                  | 0.17  | 0.26 | 0.59 | 0.16  | 0.26 | 0.73 | 0.14  | 0.37 | 0.87 | 0.13  | 0.38 | 0.89 | 0.13  | 0.41 | 0.91 |
| Marvinbryantia               | -0.12 | 0.18 | 0.50 | -0.14 | 0.11 | 0.66 | -0.10 | 0.27 | 0.87 | -0.10 | 0.28 | 0.89 | -0.08 | 0.39 | 0.91 |
| Megasphaera                  | 0.03  | 0.69 | 0.89 | 0.09  | 0.28 | 0.75 | 0.15  | 0.08 | 0.87 | 0.16  | 0.07 | 0.89 | 0.17  | 0.07 | 0.91 |
| Monoglobus                   | 0.16  | 0.18 | 0.50 | 0.13  | 0.26 | 0.73 | 0.10  | 0.41 | 0.87 | 0.10  | 0.43 | 0.89 | 0.11  | 0.39 | 0.91 |
| Moryella                     | 0.12  | 0.46 | 0.79 | 0.04  | 0.78 | 0.95 | 0.01  | 0.96 | 0.99 | 0.02  | 0.90 | 0.96 | 0.05  | 0.78 | 0.92 |
| Negativibacillus             | -0.08 | 0.38 | 0.72 | -0.04 | 0.63 | 0.88 | -0.02 | 0.87 | 0.94 | -0.02 | 0.83 | 0.95 | -0.02 | 0.87 | 0.93 |
| NK4A214_group                | 0.02  | 0.76 | 0.95 | 0.00  | 0.98 | 0.99 | -0.03 | 0.69 | 0.92 | -0.04 | 0.62 | 0.90 | -0.02 | 0.79 | 0.92 |
| Odoribacter                  | 0.09  | 0.21 | 0.54 | 0.06  | 0.37 | 0.78 | 0.05  | 0.53 | 0.87 | 0.04  | 0.54 | 0.89 | 0.04  | 0.58 | 0.91 |
| Oscillibacter                | 0.18  | 0.14 | 0.46 | 0.15  | 0.22 | 0.67 | 0.08  | 0.55 | 0.87 | 0.06  | 0.66 | 0.90 | 0.05  | 0.69 | 0.92 |
| Oscillospira                 | -0.04 | 0.83 | 0.95 | -0.01 | 0.93 | 0.99 | -0.05 | 0.75 | 0.92 | -0.06 | 0.73 | 0.91 | -0.02 | 0.89 | 0.93 |
| Oxalobacter                  | 0.26  | 0.03 | 0.40 | 0.16  | 0.18 | 0.66 | 0.04  | 0.75 | 0.92 | 0.04  | 0.76 | 0.91 | 0.03  | 0.84 | 0.93 |
| Paludicola                   | 0.05  | 0.70 | 0.91 | 0.01  | 0.95 | 0.99 | -0.14 | 0.29 | 0.87 | -0.17 | 0.21 | 0.89 | -0.16 | 0.25 | 0.91 |
| Parabacteroides              | -0.03 | 0.78 | 0.95 | 0.01  | 0.94 | 0.99 | 0.07  | 0.47 | 0.87 | 0.09  | 0.35 | 0.89 | 0.10  | 0.28 | 0.91 |
| Paraprevotella               | 0.02  | 0.81 | 0.95 | 0.03  | 0.67 | 0.90 | 0.02  | 0.74 | 0.92 | 0.02  | 0.76 | 0.91 | 0.03  | 0.66 | 0.91 |
| Parasutterella               | 0.16  | 0.02 | 0.35 | 0.14  | 0.03 | 0.66 | 0.11  | 0.11 | 0.87 | 0.12  | 0.10 | 0.89 | 0.10  | 0.16 | 0.91 |
| Peptococcus                  | 0.29  | 0.05 | 0.40 | 0.23  | 0.10 | 0.66 | 0.19  | 0.22 | 0.87 | 0.18  | 0.23 | 0.89 | 0.20  | 0.18 | 0.91 |
| Phascolarctobacterium        | 0.07  | 0.26 | 0.59 | 0.09  | 0.17 | 0.66 | 0.10  | 0.14 | 0.87 | 0.09  | 0.17 | 0.89 | 0.08  | 0.25 | 0.91 |
| Phocea                       | -0.13 | 0.41 | 0.75 | -0.14 | 0.36 | 0.78 | -0.19 | 0.25 | 0.87 | -0.18 | 0.28 | 0.89 | -0.15 | 0.35 | 0.91 |
| Prevotella                   | -0.06 | 0.37 | 0.72 | -0.02 | 0.80 | 0.96 | 0.00  | 0.98 | 0.99 | 0.01  | 0.92 | 0.96 | 0.01  | 0.90 | 0.93 |
| Romboutsia                   | 0.01  | 0.96 | 0.98 | 0.02  | 0.85 | 0.97 | 0.00  | 0.98 | 0.99 | 0.01  | 0.95 | 0.97 | 0.01  | 0.94 | 0.96 |
| Roseburia                    | -0.06 | 0.59 | 0.87 | -0.06 | 0.62 | 0.88 | -0.05 | 0.70 | 0.92 | -0.03 | 0.78 | 0.91 | -0.02 | 0.87 | 0.93 |
| Ruminococcus                 | 0.09  | 0.27 | 0.59 | 0.03  | 0.68 | 0.90 | 0.02  | 0.84 | 0.93 | 0.01  | 0.86 | 0.96 | 0.02  | 0.83 | 0.93 |
| Sellimonas                   | 0.21  | 0.08 | 0.43 | 0.14  | 0.22 | 0.67 | 0.15  | 0.22 | 0.87 | 0.13  | 0.28 | 0.89 | 0.15  | 0.22 | 0.91 |
| Shuttleworthia               | 0.28  | 0.01 | 0.31 | 0.18  | 0.10 | 0.66 | 0.11  | 0.34 | 0.87 | 0.10  | 0.41 | 0.89 | 0.13  | 0.28 | 0.91 |
| Slackia                      | -0.05 | 0.58 | 0.87 | -0.05 | 0.64 | 0.88 | -0.02 | 0.82 | 0.93 | -0.01 | 0.92 | 0.96 | -0.03 | 0.75 | 0.92 |
| Streptococcus                | 0.18  | 0.19 | 0.51 | 0.19  | 0.16 | 0.66 | 0.21  | 0.14 | 0.87 | 0.22  | 0.13 | 0.89 | 0.24  | 0.11 | 0.91 |
| Subdoligranulum              | 0.16  | 0.11 | 0.44 | 0.12  | 0.21 | 0.66 | 0.07  | 0.50 | 0.87 | 0.08  | 0.47 | 0.89 | 0.09  | 0.38 | 0.91 |
| Sutterella                   | -0.11 | 0.09 | 0.44 | -0.06 | 0.29 | 0.76 | -0.05 | 0.40 | 0.87 | -0.05 | 0.43 | 0.89 | -0.05 | 0.43 | 0.91 |
| TM7x                         | -0.04 | 0.77 | 0.95 | -0.09 | 0.49 | 0.86 | -0.16 | 0.25 | 0.87 | -0.16 | 0.26 | 0.89 | -0.12 | 0.40 | 0.91 |
| Turicibacter                 | 0.31  | 0.05 | 0.40 | 0.33  | 0.03 | 0.66 | 0.34  | 0.03 | 0.87 | 0.34  | 0.03 | 0.89 | 0.30  | 0.06 | 0.91 |
| Tuzzerella                   | -0.08 | 0.38 | 0.72 | -0.05 | 0.57 | 0.88 | -0.10 | 0.34 | 0.87 | -0.11 | 0.29 | 0.89 | -0.13 | 0.21 | 0.91 |
| UBA1819                      | 0.07  | 0.65 | 0.89 | 0.07  | 0.64 | 0.88 | 0.01  | 0.97 | 0.99 | -0.03 | 0.87 | 0.96 | -0.02 | 0.90 | 0.93 |
| UCG.002                      | 0.13  | 0.06 | 0.42 | 0.10  | 0.15 | 0.66 | 0.06  | 0.44 | 0.87 | 0.05  | 0.48 | 0.89 | 0.06  | 0.45 | 0.91 |
| UCG.003                      | 0.01  | 0.95 | 0.98 | -0.03 | 0.72 | 0.92 | -0.07 | 0.38 | 0.87 | -0.07 | 0.40 | 0.89 | -0.08 | 0.34 | 0.91 |
| UCG.005                      | 0.07  | 0.47 | 0.79 | 0.02  | 0.85 | 0.97 | -0.07 | 0.45 | 0.87 | -0.08 | 0.39 | 0.89 | -0.09 | 0.37 | 0.91 |
| UCG.009                      | 0.07  | 0.61 | 0.87 | -0.03 | 0.82 | 0.96 | -0.04 | 0.79 | 0.93 | -0.05 | 0.75 | 0.91 | -0.03 | 0.84 | 0.93 |
| Veillonella                  | 0.10  | 0.37 | 0.72 | 0.08  | 0.44 | 0.79 | 0.04  | 0.70 | 0.92 | 0.05  | 0.62 | 0.90 | 0.07  | 0.54 | 0.91 |

Multivariable-adjusted regression models adjusted for:

Model 1: sequencing batch, age, race, gender, study center

Model 2: Model 1, with education

Model 3: Model 2, with physical activity, diet score, medication use, and smoking

Model 4: Model 3 with BMI

Model 5: Model 4 with hypertension and diabetes

eTable 57: Multivariable-adjusted regression coefficients, p-values, and false discovery rate (FDR)-adjusted p-values for genera among female participants with respect to category fluency.

|                               | Model1 |         |      | Model2 |         |      | Model3 |         |      | Model4 |         |      | Model5 |         |      |
|-------------------------------|--------|---------|------|--------|---------|------|--------|---------|------|--------|---------|------|--------|---------|------|
|                               | beta   | p-value | FDR  | beta   | p-value | FDR  | beta   | p-value | FDR  | beta   | p-value | FDR  | beta   | p-value | FDR  |
| Acetanaerobacterium           | -0.20  | 0.71    | 0.87 | 0.07   | 0.89    | 0.98 | 0.15   | 0.79    | 0.96 | 0.11   | 0.85    | 0.99 | 0.09   | 0.87    | 1.00 |
| Acidaminococcus               | -0.36  | 0.06    | 0.43 | -0.25  | 0.19    | 0.79 | -0.20  | 0.35    | 0.95 | -0.19  | 0.35    | 0.94 | -0.22  | 0.29    | 1.00 |
| Actinomyces                   | -0.92  | 0.06    | 0.43 | -0.79  | 0.10    | 0.71 | -0.77  | 0.14    | 0.89 | -0.74  | 0.16    | 0.94 | -0.69  | 0.19    | 1.00 |
| Adlercreutzia                 | -0.04  | 0.89    | 0.92 | -0.15  | 0.61    | 0.94 | -0.15  | 0.64    | 0.96 | -0.18  | 0.58    | 0.99 | -0.22  | 0.51    | 1.00 |
| Agathobacter                  | -0.27  | 0.45    | 0.72 | -0.23  | 0.51    | 0.90 | -0.35  | 0.34    | 0.95 | -0.32  | 0.39    | 0.94 | -0.27  | 0.47    | 1.00 |
| Akkermansia                   | 0.21   | 0.25    | 0.72 | 0.17   | 0.36    | 0.86 | 0.17   | 0.39    | 0.95 | 0.16   | 0.42    | 0.94 | 0.14   | 0.49    | 1.00 |
| Alistipes                     | 0.06   | 0.85    | 0.92 | 0.07   | 0.82    | 0.95 | -0.06  | 0.84    | 0.96 | -0.07  | 0.82    | 0.99 | -0.08  | 0.80    | 1.00 |
| Anaerofilum                   | 0.79   | 0.06    | 0.43 | 0.47   | 0.25    | 0.85 | 0.49   | 0.26    | 0.95 | 0.45   | 0.30    | 0.94 | 0.50   | 0.26    | 1.00 |
| Anaerostipes                  | 0.07   | 0.87    | 0.92 | 0.01   | 0.98    | 1.00 | -0.10  | 0.83    | 0.96 | -0.10  | 0.81    | 0.99 | -0.11  | 0.81    | 1.00 |
| Anaerotruncus                 | 0.63   | 0.10    | 0.50 | 0.57   | 0.13    | 0.79 | 0.60   | 0.14    | 0.89 | 0.55   | 0.18    | 0.94 | 0.55   | 0.19    | 1.00 |
| Angelakisella                 | 0.47   | 0.40    | 0.72 | 0.26   | 0.63    | 0.94 | 0.32   | 0.60    | 0.96 | 0.27   | 0.65    | 0.99 | 0.26   | 0.67    | 1.00 |
| Bacteroides                   | -0.76  | 0.32    | 0.72 | -0.94  | 0.21    | 0.79 | -0.93  | 0.23    | 0.94 | -0.89  | 0.25    | 0.94 | -0.78  | 0.32    | 1.00 |
| Barnesiella                   | 0.51   | 0.00    | 0.12 | 0.50   | 0.00    | 0.28 | 0.62   | 0.00    | 0.10 | 0.62   | 0.00    | 0.10 | 0.64   | 0.00    | 0.07 |
| Bifidobacterium               | -0.37  | 0.12    | 0.53 | -0.24  | 0.30    | 0.85 | -0.28  | 0.27    | 0.95 | -0.28  | 0.27    | 0.94 | -0.31  | 0.23    | 1.00 |
| Bilophila                     | 0.41   | 0.08    | 0.47 | 0.42   | 0.07    | 0.67 | 0.43   | 0.08    | 0.89 | 0.43   | 0.08    | 0.94 | 0.40   | 0.11    | 0.99 |
| Blautia                       | -0.40  | 0.64    | 0.82 | -0.36  | 0.66    | 0.94 | -0.42  | 0.62    | 0.96 | -0.46  | 0.59    | 0.99 | -0.43  | 0.63    | 1.00 |
| Butyricoccus                  | 0.47   | 0.39    | 0.72 | 0.20   | 0.70    | 0.94 | 0.21   | 0.72    | 0.96 | 0.24   | 0.68    | 0.99 | 0.19   | 0.74    | 1.00 |
| Butyricimonas                 | 0.33   | 0.11    | 0.51 | 0.27   | 0.17    | 0.79 | 0.32   | 0.13    | 0.89 | 0.34   | 0.11    | 0.94 | 0.35   | 0.11    | 0.99 |
| CAG.56                        | -0.02  | 0.94    | 0.95 | -0.06  | 0.80    | 0.95 | -0.09  | 0.73    | 0.96 | -0.08  | 0.75    | 0.99 | -0.05  | 0.84    | 1.00 |
| Candidatus_Soleaferrea        | 0.53   | 0.30    | 0.72 | 0.50   | 0.31    | 0.85 | 0.60   | 0.26    | 0.95 | 0.58   | 0.27    | 0.94 | 0.57   | 0.29    | 1.00 |
| Caproiciproducens             | -0.04  | 0.93    | 0.95 | 0.01   | 0.98    | 1.00 | 0.09   | 0.83    | 0.96 | 0.07   | 0.87    | 0.99 | -0.01  | 0.98    | 1.00 |
| Christensenellaceae_R.7_group | 0.37   | 0.07    | 0.47 | 0.26   | 0.19    | 0.79 | 0.29   | 0.20    | 0.94 | 0.27   | 0.23    | 0.94 | 0.27   | 0.24    | 1.00 |
| Clostridium_sensu_stricto_1   | -0.18  | 0.51    | 0.75 | -0.21  | 0.44    | 0.89 | -0.27  | 0.34    | 0.95 | -0.27  | 0.34    | 0.94 | -0.31  | 0.26    | 1.00 |
| Colidextribacter              | 0.49   | 0.36    | 0.72 | 0.45   | 0.39    | 0.88 | 0.44   | 0.44    | 0.95 | 0.39   | 0.49    | 0.99 | 0.54   | 0.36    | 1.00 |
| Collinsella                   | 0.18   | 0.42    | 0.72 | 0.41   | 0.06    | 0.67 | 0.41   | 0.08    | 0.89 | 0.44   | 0.06    | 0.94 | 0.43   | 0.07    | 0.99 |
| Coprobacter                   | 0.16   | 0.53    | 0.75 | 0.05   | 0.83    | 0.95 | -0.07  | 0.80    | 0.96 | -0.08  | 0.78    | 0.99 | -0.08  | 0.77    | 1.00 |
| Coprococcus                   | -0.17  | 0.52    | 0.75 | -0.07  | 0.79    | 0.95 | -0.10  | 0.72    | 0.96 | -0.09  | 0.74    | 0.99 | -0.03  | 0.93    | 1.00 |
| Defluviitaleaceae_UCG.011     | 0.82   | 0.03    | 0.43 | 0.67   | 0.08    | 0.67 | 0.80   | 0.05    | 0.89 | 0.76   | 0.06    | 0.94 | 0.69   | 0.10    | 0.99 |
| Desulfovibrio                 | 0.00   | 1.00    | 1.00 | 0.03   | 0.89    | 0.98 | 0.03   | 0.89    | 0.96 | 0.03   | 0.92    | 0.99 | 0.02   | 0.95    | 1.00 |
| Dialister                     | -0.04  | 0.82    | 0.92 | -0.04  | 0.80    | 0.95 | -0.01  | 0.97    | 1.00 | -0.01  | 0.98    | 1.00 | 0.03   | 0.87    | 1.00 |
| DNF00809                      | 0.06   | 0.89    | 0.92 | 0.02   | 0.96    | 0.99 | 0.01   | 0.99    | 1.00 | 0.00   | 1.00    | 1.00 | -0.01  | 0.99    | 1.00 |
| Dorea                         | -0.30  | 0.37    | 0.72 | -0.16  | 0.62    | 0.94 | -0.19  | 0.58    | 0.96 | -0.17  | 0.63    | 0.99 | -0.20  | 0.57    | 1.00 |
| DTU089                        | -0.30  | 0.42    | 0.72 | -0.37  | 0.29    | 0.85 | -0.33  | 0.38    | 0.95 | -0.34  | 0.36    | 0.94 | -0.27  | 0.48    | 1.00 |
| Eggerthella                   | -0.14  | 0.68    | 0.86 | -0.16  | 0.64    | 0.94 | -0.17  | 0.62    | 0.96 | -0.20  | 0.57    | 0.99 | -0.14  | 0.69    | 1.00 |
| Eisenbergiella                | 0.25   | 0.46    | 0.72 | 0.23   | 0.49    | 0.89 | 0.20   | 0.56    | 0.96 | 0.15   | 0.66    | 0.99 | 0.17   | 0.62    | 1.00 |
| Erysipelatoclostridium        | -0.14  | 0.71    | 0.87 | -0.16  | 0.66    | 0.94 | -0.18  | 0.64    | 0.96 | -0.21  | 0.58    | 0.99 | -0.21  | 0.59    | 1.00 |
| Erysipelotrichaceae_UCG.003   | -0.07  | 0.80    | 0.92 | -0.08  | 0.77    | 0.95 | 0.00   | 1.00    | 1.00 | -0.01  | 0.97    | 1.00 | -0.05  | 0.85    | 1.00 |
| Escherichia_Shigella          | -0.21  | 0.39    | 0.72 | -0.15  | 0.51    | 0.90 | -0.08  | 0.76    | 0.96 | -0.07  | 0.78    | 0.99 | -0.05  | 0.84    | 1.00 |
| Faecalibacterium              | 0.05   | 0.89    | 0.92 | -0.12  | 0.70    | 0.94 | -0.23  | 0.50    | 0.95 | -0.21  | 0.54    | 0.99 | -0.21  | 0.54    | 1.00 |
| Family_XIII_AD3011_group      | 0.16   | 0.64    | 0.82 | 0.08   | 0.81    | 0.95 | 0.07   | 0.85    | 0.96 | 0.04   | 0.91    | 0.99 | -0.02  | 0.95    | 1.00 |
| Family_XIII_UCG.001           | 0.78   | 0.06    | 0.43 | 0.70   | 0.08    | 0.67 | 0.70   | 0.11    | 0.89 | 0.67   | 0.13    | 0.94 | 0.61   | 0.17    | 1.00 |
| Flavonifractor                | -0.44  | 0.23    | 0.72 | -0.46  | 0.20    | 0.79 | -0.46  | 0.23    | 0.94 | -0.46  | 0.23    | 0.94 | -0.44  | 0.26    | 1.00 |
| Frisingicoccus                | 0.48   | 0.08    | 0.47 | 0.35   | 0.20    | 0.79 | 0.26   | 0.36    | 0.95 | 0.23   | 0.42    | 0.94 | 0.25   | 0.38    | 1.00 |
| Fusicatenibacter              | 0.26   | 0.31    | 0.72 | 0.18   | 0.48    | 0.89 | 0.05   | 0.87    | 0.96 | 0.08   | 0.77    | 0.99 | 0.00   | 1.00    | 1.00 |
| Fusobacterium                 | -0.08  | 0.85    | 0.92 | 0.00   | 0.99    | 1.00 | 0.19   | 0.68    | 0.96 | 0.16   | 0.72    | 0.99 | 0.19   | 0.69    | 1.00 |
| GCA.900066575                 | 0.05   | 0.89    | 0.92 | -0.14  | 0.71    | 0.94 | -0.06  | 0.88    | 0.96 | -0.10  | 0.81    | 0.99 | -0.11  | 0.78    | 1.00 |
| GCA.900066755                 | -0.45  | 0.45    | 0.72 | -0.40  | 0.48    | 0.89 | -0.42  | 0.48    | 0.95 | -0.50  | 0.41    | 0.94 | -0.45  | 0.47    | 1.00 |
| Gordonibacter                 | 0.52   | 0.15    | 0.62 | 0.44   | 0.21    | 0.79 | 0.54   | 0.15    | 0.89 | 0.50   | 0.19    | 0.94 | 0.49   | 0.21    | 1.00 |
| Granulicatella                | 0.09   | 0.85    | 0.92 | 0.07   | 0.88    | 0.98 | 0.01   | 0.98    | 1.00 | 0.04   | 0.93    | 0.99 | 0.16   | 0.75    | 1.00 |
| Haemophilus                   | 0.14   | 0.63    | 0.82 | 0.02   | 0.95    | 0.99 | -0.17  | 0.58    | 0.96 | -0.17  | 0.58    | 0.99 | -0.12  | 0.69    | 1.00 |
| Harryflintia                  | 0.36   | 0.39    | 0.72 | 0.36   | 0.37    | 0.86 | 0.33   | 0.45    | 0.95 | 0.29   | 0.51    | 0.99 | 0.30   | 0.49    | 1.00 |

|                               |       |      |      |       |      |      |       |      |      |       |      |      |       |      |      |
|-------------------------------|-------|------|------|-------|------|------|-------|------|------|-------|------|------|-------|------|------|
| Holdemania                    | 1.20  | 0.06 | 0.43 | 1.14  | 0.06 | 0.67 | 1.14  | 0.08 | 0.89 | 1.11  | 0.09 | 0.94 | 1.04  | 0.11 | 0.99 |
| Hungatella                    | -0.17 | 0.59 | 0.80 | -0.09 | 0.76 | 0.95 | -0.08 | 0.82 | 0.96 | -0.08 | 0.82 | 0.99 | -0.04 | 0.90 | 1.00 |
| Hydrogenoanaerobacterium      | 0.32  | 0.35 | 0.72 | 0.13  | 0.70 | 0.94 | 0.18  | 0.63 | 0.96 | 0.13  | 0.73 | 0.99 | 0.09  | 0.82 | 1.00 |
| Incertae_Sedis                | 0.30  | 0.59 | 0.80 | 0.29  | 0.58 | 0.94 | 0.33  | 0.57 | 0.96 | 0.31  | 0.60 | 0.99 | 0.29  | 0.61 | 1.00 |
| Intestinibacter               | -0.53 | 0.12 | 0.53 | -0.46 | 0.17 | 0.79 | -0.50 | 0.16 | 0.89 | -0.47 | 0.18 | 0.94 | -0.45 | 0.21 | 1.00 |
| Intestinimonas                | 0.88  | 0.00 | 0.12 | 0.79  | 0.01 | 0.28 | 0.80  | 0.01 | 0.59 | 0.77  | 0.02 | 0.84 | 0.83  | 0.01 | 0.50 |
| Lachnoclostridium             | -0.66 | 0.31 | 0.72 | -0.27 | 0.67 | 0.94 | -0.09 | 0.90 | 0.96 | -0.05 | 0.94 | 0.99 | -0.03 | 0.96 | 1.00 |
| Lachnospira                   | 0.52  | 0.09 | 0.48 | 0.29  | 0.34 | 0.86 | 0.26  | 0.42 | 0.95 | 0.29  | 0.38 | 0.94 | 0.33  | 0.33 | 1.00 |
| Lachnospiraceae_FCS020_group  | 0.83  | 0.02 | 0.41 | 0.59  | 0.08 | 0.67 | 0.64  | 0.08 | 0.89 | 0.66  | 0.08 | 0.94 | 0.59  | 0.11 | 0.99 |
| Lachnospiraceae_ND3007_group  | 0.24  | 0.29 | 0.72 | 0.14  | 0.53 | 0.91 | 0.04  | 0.87 | 0.96 | 0.06  | 0.79 | 0.99 | 0.07  | 0.76 | 1.00 |
| Lachnospiraceae_NK4A136_group | 0.43  | 0.19 | 0.71 | 0.24  | 0.46 | 0.89 | 0.12  | 0.74 | 0.96 | 0.14  | 0.69 | 0.99 | 0.17  | 0.64 | 1.00 |
| Lachnospiraceae_UCG.001       | 0.51  | 0.04 | 0.43 | 0.45  | 0.06 | 0.67 | 0.39  | 0.13 | 0.89 | 0.37  | 0.16 | 0.94 | 0.39  | 0.14 | 1.00 |
| Lachnospiraceae_UCG.004       | 0.15  | 0.56 | 0.78 | 0.11  | 0.65 | 0.94 | -0.03 | 0.91 | 0.97 | -0.02 | 0.95 | 0.99 | -0.05 | 0.85 | 1.00 |
| Lachnospiraceae_UCG.010       | -0.13 | 0.73 | 0.87 | -0.29 | 0.44 | 0.89 | -0.31 | 0.44 | 0.95 | -0.32 | 0.42 | 0.94 | -0.27 | 0.50 | 1.00 |
| Lactobacillus                 | -0.22 | 0.45 | 0.72 | -0.04 | 0.90 | 0.98 | -0.08 | 0.80 | 0.96 | -0.03 | 0.92 | 0.99 | 0.00  | 0.99 | 1.00 |
| Lactococcus                   | 0.31  | 0.47 | 0.72 | 0.29  | 0.48 | 0.89 | 0.25  | 0.57 | 0.96 | 0.24  | 0.59 | 0.99 | 0.22  | 0.63 | 1.00 |
| Marvinbryantia                | -0.26 | 0.29 | 0.72 | -0.31 | 0.21 | 0.79 | -0.25 | 0.34 | 0.95 | -0.25 | 0.34 | 0.94 | -0.18 | 0.50 | 1.00 |
| Megasphaera                   | -0.15 | 0.52 | 0.75 | -0.01 | 0.95 | 0.99 | 0.02  | 0.94 | 0.99 | 0.03  | 0.91 | 0.99 | 0.01  | 0.98 | 1.00 |
| Monoglobus                    | 0.73  | 0.03 | 0.43 | 0.65  | 0.05 | 0.67 | 0.66  | 0.06 | 0.89 | 0.66  | 0.06 | 0.94 | 0.67  | 0.07 | 0.99 |
| Moryella                      | 0.37  | 0.40 | 0.72 | 0.18  | 0.67 | 0.94 | 0.17  | 0.72 | 0.96 | 0.20  | 0.67 | 0.99 | 0.22  | 0.65 | 1.00 |
| Negativibacillus              | 0.13  | 0.61 | 0.82 | 0.23  | 0.36 | 0.86 | 0.27  | 0.34 | 0.95 | 0.26  | 0.35 | 0.94 | 0.25  | 0.36 | 1.00 |
| NK4A214_group                 | 0.46  | 0.03 | 0.43 | 0.41  | 0.05 | 0.67 | 0.37  | 0.09 | 0.89 | 0.36  | 0.10 | 0.94 | 0.39  | 0.08 | 0.99 |
| Odoribacter                   | 0.18  | 0.38 | 0.72 | 0.11  | 0.58 | 0.94 | 0.06  | 0.79 | 0.96 | 0.05  | 0.80 | 0.99 | 0.03  | 0.89 | 1.00 |
| Oscillibacter                 | 0.45  | 0.20 | 0.72 | 0.35  | 0.30 | 0.85 | 0.46  | 0.21 | 0.94 | 0.42  | 0.25 | 0.94 | 0.39  | 0.29 | 1.00 |
| Oscillospira                  | -0.39 | 0.41 | 0.72 | -0.33 | 0.48 | 0.89 | -0.22 | 0.66 | 0.96 | -0.23 | 0.65 | 0.99 | -0.14 | 0.78 | 1.00 |
| Oxalobacter                   | 0.46  | 0.19 | 0.71 | 0.19  | 0.59 | 0.94 | 0.28  | 0.46 | 0.95 | 0.28  | 0.47 | 0.99 | 0.23  | 0.55 | 1.00 |
| Paludicola                    | 0.14  | 0.71 | 0.87 | 0.03  | 0.93 | 0.99 | 0.05  | 0.90 | 0.96 | 0.00  | 0.99 | 1.00 | -0.01 | 0.98 | 1.00 |
| Parabacteroides               | 0.18  | 0.49 | 0.74 | 0.26  | 0.30 | 0.85 | 0.22  | 0.42 | 0.95 | 0.26  | 0.34 | 0.94 | 0.32  | 0.24 | 1.00 |
| Paraprevotella                | -0.18 | 0.37 | 0.72 | -0.15 | 0.45 | 0.89 | -0.15 | 0.49 | 0.95 | -0.15 | 0.48 | 0.99 | -0.14 | 0.50 | 1.00 |
| Parasutterella                | 0.23  | 0.23 | 0.72 | 0.19  | 0.32 | 0.85 | 0.17  | 0.41 | 0.95 | 0.18  | 0.39 | 0.94 | 0.11  | 0.60 | 1.00 |
| Peptococcus                   | 0.94  | 0.02 | 0.43 | 0.80  | 0.05 | 0.67 | 0.68  | 0.12 | 0.89 | 0.66  | 0.13 | 0.94 | 0.72  | 0.10 | 0.99 |
| Phascolarctobacterium         | 0.15  | 0.43 | 0.72 | 0.18  | 0.32 | 0.85 | 0.21  | 0.28 | 0.95 | 0.20  | 0.31 | 0.94 | 0.17  | 0.39 | 1.00 |
| Phoceia                       | -0.36 | 0.44 | 0.72 | -0.38 | 0.39 | 0.88 | -0.34 | 0.48 | 0.95 | -0.31 | 0.51 | 0.99 | -0.22 | 0.65 | 1.00 |
| Prevotella                    | 0.03  | 0.89 | 0.92 | 0.14  | 0.43 | 0.89 | 0.16  | 0.41 | 0.95 | 0.17  | 0.38 | 0.94 | 0.17  | 0.40 | 1.00 |
| Romboutsia                    | 0.07  | 0.82 | 0.92 | 0.11  | 0.72 | 0.94 | 0.06  | 0.86 | 0.96 | 0.08  | 0.80 | 0.99 | 0.09  | 0.80 | 1.00 |
| Roseburia                     | -0.11 | 0.74 | 0.88 | -0.09 | 0.78 | 0.95 | -0.06 | 0.87 | 0.96 | -0.03 | 0.93 | 0.99 | 0.05  | 0.90 | 1.00 |
| Ruminococcus                  | 0.38  | 0.09 | 0.48 | 0.24  | 0.28 | 0.85 | 0.16  | 0.50 | 0.95 | 0.16  | 0.51 | 0.99 | 0.13  | 0.58 | 1.00 |
| Sellimonas                    | 0.33  | 0.32 | 0.72 | 0.15  | 0.65 | 0.94 | 0.09  | 0.80 | 0.96 | 0.05  | 0.89 | 0.99 | 0.05  | 0.88 | 1.00 |
| Shuttleworthia                | 0.33  | 0.29 | 0.72 | 0.03  | 0.92 | 0.99 | 0.09  | 0.80 | 0.96 | 0.06  | 0.87 | 0.99 | 0.11  | 0.74 | 1.00 |
| Slackia                       | -0.11 | 0.69 | 0.87 | -0.09 | 0.75 | 0.95 | -0.07 | 0.81 | 0.96 | -0.05 | 0.88 | 0.99 | -0.11 | 0.71 | 1.00 |
| Streptococcus                 | 0.09  | 0.81 | 0.92 | 0.11  | 0.78 | 0.95 | 0.11  | 0.79 | 0.96 | 0.13  | 0.76 | 0.99 | 0.15  | 0.73 | 1.00 |
| Subdoligranulum               | 0.84  | 0.00 | 0.12 | 0.74  | 0.01 | 0.28 | 0.66  | 0.03 | 0.89 | 0.67  | 0.03 | 0.94 | 0.73  | 0.02 | 0.63 |
| Sutterella                    | -0.20 | 0.25 | 0.72 | -0.09 | 0.61 | 0.94 | -0.17 | 0.37 | 0.95 | -0.16 | 0.38 | 0.94 | -0.14 | 0.46 | 1.00 |
| TM7x                          | -0.36 | 0.37 | 0.72 | -0.50 | 0.20 | 0.79 | -0.43 | 0.30 | 0.95 | -0.42 | 0.31 | 0.94 | -0.37 | 0.38 | 1.00 |
| Turicibacter                  | -0.49 | 0.28 | 0.72 | -0.44 | 0.32 | 0.85 | -0.35 | 0.45 | 0.95 | -0.36 | 0.44 | 0.96 | -0.46 | 0.33 | 1.00 |
| Tuzzerella                    | 0.22  | 0.43 | 0.72 | 0.30  | 0.26 | 0.85 | 0.30  | 0.30 | 0.95 | 0.28  | 0.34 | 0.94 | 0.27  | 0.36 | 1.00 |
| UBA1819                       | 0.52  | 0.23 | 0.72 | 0.51  | 0.21 | 0.79 | 0.59  | 0.18 | 0.93 | 0.54  | 0.23 | 0.94 | 0.59  | 0.20 | 1.00 |
| UCG.002                       | 0.27  | 0.18 | 0.70 | 0.19  | 0.33 | 0.85 | 0.15  | 0.50 | 0.95 | 0.14  | 0.53 | 0.99 | 0.16  | 0.49 | 1.00 |
| UCG.003                       | 0.24  | 0.32 | 0.72 | 0.15  | 0.52 | 0.91 | 0.12  | 0.64 | 0.96 | 0.13  | 0.62 | 0.99 | 0.09  | 0.72 | 1.00 |
| UCG.005                       | 0.49  | 0.06 | 0.43 | 0.37  | 0.15 | 0.79 | 0.35  | 0.21 | 0.94 | 0.33  | 0.24 | 0.94 | 0.30  | 0.29 | 1.00 |
| UCG.009                       | 0.28  | 0.50 | 0.75 | 0.00  | 1.00 | 1.00 | -0.03 | 0.95 | 0.99 | -0.04 | 0.92 | 0.99 | -0.02 | 0.95 | 1.00 |
| Veillonella                   | -0.32 | 0.28 | 0.72 | -0.37 | 0.21 | 0.79 | -0.43 | 0.18 | 0.93 | -0.41 | 0.20 | 0.94 | -0.37 | 0.26 | 1.00 |

Multivariable-adjusted regression models adjusted for:

Model 1: sequencing batch, age, race, gender, study center

Model 2: Model 1, with education



Model 3: Model 2, with physical activity, diet score, medication use, and smoking

Model 4: Model 3 with BMI

Model 5: Model 4 with hypertension and diabetes

eTable 58: Multivariable-adjusted regression coefficients, p-values, and false discovery rate (FDR)-adjusted p-values for genera among female participants with respect to letter fluency.

|                               | Model1 |         |      | Model2 |         |      | Model3 |         |      | Model4 |         |      | Model5 |         |      |
|-------------------------------|--------|---------|------|--------|---------|------|--------|---------|------|--------|---------|------|--------|---------|------|
|                               | beta   | p-value | FDR  | beta   | p-value | FDR  | beta   | p-value | FDR  | beta   | p-value | FDR  | beta   | p-value | FDR  |
| Acetanaerobacterium           | 0.05   | 0.97    | 0.98 | 0.53   | 0.69    | 0.99 | 0.91   | 0.51    | 0.98 | 0.78   | 0.57    | 0.98 | 0.56   | 0.68    | 0.99 |
| Acidaminococcus               | -0.46  | 0.33    | 0.82 | -0.25  | 0.59    | 0.92 | -0.08  | 0.87    | 0.98 | -0.07  | 0.88    | 0.99 | -0.09  | 0.85    | 0.99 |
| Actinomyces                   | -1.08  | 0.37    | 0.85 | -0.82  | 0.48    | 0.91 | 0.18   | 0.88    | 0.98 | 0.28   | 0.83    | 0.99 | 0.48   | 0.71    | 0.99 |
| Adlercreutzia                 | -0.82  | 0.28    | 0.82 | -1.03  | 0.17    | 0.91 | -1.15  | 0.14    | 0.94 | -1.26  | 0.11    | 0.83 | -1.38  | 0.08    | 0.84 |
| Agathobacter                  | -0.20  | 0.82    | 0.95 | -0.12  | 0.89    | 0.99 | -0.37  | 0.68    | 0.98 | -0.26  | 0.77    | 0.99 | -0.11  | 0.90    | 0.99 |
| Akkermansia                   | 0.26   | 0.57    | 0.87 | 0.17   | 0.71    | 0.99 | 0.12   | 0.80    | 0.98 | 0.09   | 0.85    | 0.99 | 0.02   | 0.96    | 0.99 |
| Alistipes                     | 0.18   | 0.80    | 0.95 | 0.18   | 0.80    | 0.99 | -0.07  | 0.92    | 0.99 | -0.09  | 0.90    | 0.99 | -0.19  | 0.80    | 0.99 |
| Anaerofilum                   | 0.97   | 0.34    | 0.82 | 0.38   | 0.71    | 0.99 | 0.23   | 0.83    | 0.98 | 0.12   | 0.91    | 0.99 | -0.01  | 0.99    | 0.99 |
| Anaerostipes                  | -1.79  | 0.09    | 0.78 | -1.92  | 0.07    | 0.69 | -1.89  | 0.08    | 0.94 | -1.91  | 0.07    | 0.83 | -1.90  | 0.08    | 0.84 |
| Anaerotruncus                 | 0.10   | 0.91    | 0.98 | -0.02  | 0.98    | 0.99 | -0.13  | 0.89    | 0.98 | -0.34  | 0.73    | 0.99 | -0.40  | 0.68    | 0.99 |
| Angelakisella                 | 1.30   | 0.33    | 0.82 | 0.94   | 0.48    | 0.91 | 1.70   | 0.23    | 0.94 | 1.57   | 0.27    | 0.94 | 1.31   | 0.36    | 0.96 |
| Bacteroides                   | -1.50  | 0.42    | 0.85 | -1.88  | 0.30    | 0.91 | -2.12  | 0.25    | 0.94 | -1.97  | 0.29    | 0.94 | -2.01  | 0.28    | 0.96 |
| Barnesiella                   | 0.95   | 0.03    | 0.71 | 0.93   | 0.03    | 0.60 | 1.03   | 0.02    | 0.94 | 1.03   | 0.02    | 0.83 | 1.05   | 0.02    | 0.84 |
| Bifidobacterium               | -0.18  | 0.77    | 0.95 | 0.09   | 0.88    | 0.99 | -0.01  | 0.99    | 1.00 | -0.01  | 0.99    | 0.99 | -0.05  | 0.94    | 0.99 |
| Bilophila                     | 1.16   | 0.04    | 0.71 | 1.16   | 0.04    | 0.63 | 0.86   | 0.14    | 0.94 | 0.84   | 0.15    | 0.83 | 0.69   | 0.24    | 0.96 |
| Blautia                       | -3.99  | 0.05    | 0.71 | -3.96  | 0.05    | 0.63 | -3.86  | 0.06    | 0.94 | -3.97  | 0.05    | 0.83 | -3.99  | 0.06    | 0.84 |
| Butyricoccus                  | -0.37  | 0.78    | 0.95 | -0.90  | 0.50    | 0.91 | -1.92  | 0.16    | 0.94 | -1.84  | 0.18    | 0.83 | -1.76  | 0.20    | 0.96 |
| Butyricimonas                 | 0.54   | 0.28    | 0.82 | 0.45   | 0.36    | 0.91 | 0.38   | 0.46    | 0.98 | 0.42   | 0.41    | 0.95 | 0.40   | 0.43    | 0.96 |
| CAG.56                        | 0.48   | 0.43    | 0.85 | 0.42   | 0.48    | 0.91 | 0.63   | 0.32    | 0.94 | 0.64   | 0.31    | 0.94 | 0.68   | 0.29    | 0.96 |
| Candidatus_Soleaferrea        | -0.89  | 0.48    | 0.85 | -0.99  | 0.42    | 0.91 | -0.80  | 0.53    | 0.98 | -0.85  | 0.50    | 0.95 | -1.02  | 0.42    | 0.96 |
| Caproiciproducens             | -0.12  | 0.90    | 0.98 | -0.03  | 0.98    | 0.99 | -0.70  | 0.49    | 0.98 | -0.78  | 0.44    | 0.95 | -0.97  | 0.34    | 0.96 |
| Christensenellaceae_R.7_group | 0.72   | 0.15    | 0.80 | 0.54   | 0.27    | 0.91 | 0.21   | 0.70    | 0.98 | 0.13   | 0.81    | 0.99 | 0.08   | 0.88    | 0.99 |
| Clostridium_sensu_stricto_1   | -0.10  | 0.88    | 0.97 | -0.13  | 0.85    | 0.99 | -0.15  | 0.82    | 0.98 | -0.15  | 0.82    | 0.99 | -0.33  | 0.62    | 0.99 |
| Colidextribacter              | 0.81   | 0.53    | 0.86 | 0.70   | 0.58    | 0.92 | 0.30   | 0.82    | 0.98 | 0.16   | 0.91    | 0.99 | 0.38   | 0.79    | 0.99 |
| Collinsella                   | -0.69  | 0.20    | 0.82 | -0.30  | 0.58    | 0.92 | -0.49  | 0.39    | 0.95 | -0.42  | 0.45    | 0.95 | -0.47  | 0.41    | 0.96 |
| Coprobacter                   | 0.15   | 0.81    | 0.95 | -0.09  | 0.89    | 0.99 | -0.60  | 0.37    | 0.95 | -0.63  | 0.35    | 0.94 | -0.66  | 0.33    | 0.96 |
| Coprococcus                   | -0.12  | 0.85    | 0.96 | 0.06   | 0.92    | 0.99 | 0.00   | 1.00    | 1.00 | 0.03   | 0.96    | 0.99 | 0.10   | 0.88    | 0.99 |
| Defluviitaleaceae_UCG.011     | 0.21   | 0.83    | 0.95 | -0.11  | 0.91    | 0.99 | -0.49  | 0.61    | 0.98 | -0.65  | 0.51    | 0.95 | -0.94  | 0.35    | 0.96 |
| Desulfovibrio                 | -0.19  | 0.75    | 0.95 | -0.10  | 0.86    | 0.99 | -0.22  | 0.71    | 0.98 | -0.26  | 0.67    | 0.99 | -0.26  | 0.67    | 0.99 |
| Dialister                     | -0.49  | 0.26    | 0.82 | -0.50  | 0.24    | 0.91 | -0.41  | 0.37    | 0.95 | -0.40  | 0.37    | 0.95 | -0.38  | 0.41    | 0.96 |
| DNF00809                      | -1.01  | 0.34    | 0.82 | -1.08  | 0.30    | 0.91 | -1.46  | 0.18    | 0.94 | -1.48  | 0.18    | 0.83 | -1.54  | 0.16    | 0.96 |
| Dorea                         | -0.69  | 0.39    | 0.85 | -0.46  | 0.57    | 0.92 | -0.87  | 0.29    | 0.94 | -0.80  | 0.33    | 0.94 | -0.85  | 0.30    | 0.96 |
| DTU089                        | -0.73  | 0.41    | 0.85 | -0.87  | 0.32    | 0.91 | -1.18  | 0.19    | 0.94 | -1.22  | 0.18    | 0.83 | -1.04  | 0.25    | 0.96 |
| Eggerthella                   | -1.70  | 0.04    | 0.71 | -1.78  | 0.03    | 0.60 | -1.41  | 0.10    | 0.94 | -1.49  | 0.09    | 0.83 | -1.40  | 0.11    | 0.96 |
| Eisenbergiella                | -0.46  | 0.57    | 0.87 | -0.51  | 0.53    | 0.92 | -0.81  | 0.32    | 0.94 | -0.99  | 0.23    | 0.94 | -0.83  | 0.32    | 0.96 |
| Erysipelatoclostridium        | -0.38  | 0.67    | 0.95 | -0.45  | 0.61    | 0.94 | -0.40  | 0.66    | 0.98 | -0.51  | 0.58    | 0.98 | -0.53  | 0.56    | 0.99 |
| Erysipelotrichaceae_UCG.003   | 0.44   | 0.50    | 0.86 | 0.42   | 0.51    | 0.91 | 0.15   | 0.83    | 0.98 | 0.11   | 0.87    | 0.99 | -0.02  | 0.98    | 0.99 |
| Escherichia_Shigella          | -1.11  | 0.06    | 0.71 | -1.00  | 0.08    | 0.71 | -0.88  | 0.14    | 0.94 | -0.86  | 0.16    | 0.83 | -0.90  | 0.15    | 0.96 |
| Faecalibacterium              | 0.50   | 0.54    | 0.86 | 0.20   | 0.80    | 0.99 | 0.17   | 0.84    | 0.98 | 0.24   | 0.77    | 0.99 | 0.17   | 0.84    | 0.99 |
| Family_XIII_AD3011_group      | 0.31   | 0.71    | 0.95 | 0.19   | 0.82    | 0.99 | 0.05   | 0.95    | 0.99 | -0.04  | 0.96    | 0.99 | -0.12  | 0.89    | 0.99 |
| Family_XIII_UCG.001           | 1.43   | 0.16    | 0.80 | 1.28   | 0.20    | 0.91 | 1.20   | 0.26    | 0.94 | 1.10   | 0.30    | 0.94 | 1.05   | 0.32    | 0.96 |
| Flavonifractor                | -2.05  | 0.02    | 0.71 | -2.08  | 0.02    | 0.60 | -2.04  | 0.03    | 0.94 | -2.04  | 0.03    | 0.83 | -2.11  | 0.02    | 0.84 |
| Frisingicoccus                | 0.20   | 0.76    | 0.95 | -0.10  | 0.88    | 0.99 | -0.38  | 0.58    | 0.98 | -0.49  | 0.48    | 0.95 | -0.47  | 0.50    | 0.96 |
| Fusicatenibacter              | 0.34   | 0.58    | 0.87 | 0.18   | 0.77    | 0.99 | -0.30  | 0.65    | 0.98 | -0.20  | 0.77    | 0.99 | -0.36  | 0.59    | 0.99 |
| Fusobacterium                 | 1.70   | 0.12    | 0.80 | 1.77   | 0.10    | 0.73 | 2.33   | 0.04    | 0.94 | 2.26   | 0.05    | 0.83 | 2.17   | 0.05    | 0.84 |
| GCA.900066575                 | 1.04   | 0.26    | 0.82 | 0.72   | 0.44    | 0.91 | 0.21   | 0.83    | 0.98 | 0.08   | 0.93    | 0.99 | -0.18  | 0.86    | 0.99 |
| GCA.900066755                 | -0.84  | 0.56    | 0.87 | -0.80  | 0.57    | 0.92 | -0.93  | 0.53    | 0.98 | -1.18  | 0.43    | 0.95 | -1.22  | 0.41    | 0.96 |
| Gordonibacter                 | 0.64   | 0.47    | 0.85 | 0.48   | 0.58    | 0.92 | 0.21   | 0.82    | 0.98 | 0.06   | 0.95    | 0.99 | -0.01  | 0.99    | 0.99 |
| Granulicatella                | 0.90   | 0.44    | 0.85 | 0.87   | 0.45    | 0.91 | 1.48   | 0.22    | 0.94 | 1.60   | 0.18    | 0.83 | 1.87   | 0.12    | 0.96 |
| Haemophilus                   | 0.51   | 0.47    | 0.85 | 0.32   | 0.65    | 0.98 | 0.34   | 0.63    | 0.98 | 0.34   | 0.64    | 0.99 | 0.39   | 0.59    | 0.99 |
| Harryflintia                  | -1.21  | 0.23    | 0.82 | -1.17  | 0.24    | 0.91 | -1.39  | 0.18    | 0.94 | -1.54  | 0.14    | 0.83 | -1.83  | 0.08    | 0.84 |
| Holdemania                    | 1.63   | 0.29    | 0.82 | 1.48   | 0.33    | 0.91 | 1.24   | 0.43    | 0.98 | 1.14   | 0.47    | 0.95 | 0.56   | 0.73    | 0.99 |

|                               |       |      |      |       |      |      |       |      |      |       |      |      |       |      |      |
|-------------------------------|-------|------|------|-------|------|------|-------|------|------|-------|------|------|-------|------|------|
| Hungatella                    | -0.86 | 0.27 | 0.82 | -0.74 | 0.34 | 0.91 | -0.46 | 0.57 | 0.98 | -0.46 | 0.57 | 0.98 | -0.23 | 0.77 | 0.99 |
| Hydrogenoanaerobacterium      | 1.01  | 0.22 | 0.82 | 0.68  | 0.40 | 0.91 | 0.87  | 0.32 | 0.94 | 0.72  | 0.41 | 0.95 | 0.67  | 0.45 | 0.96 |
| Incertae_Sedis                | -1.10 | 0.41 | 0.85 | -1.08 | 0.41 | 0.91 | -0.78 | 0.57 | 0.98 | -0.85 | 0.53 | 0.97 | -0.97 | 0.48 | 0.96 |
| Intestinibacter               | -0.47 | 0.58 | 0.87 | -0.32 | 0.70 | 0.99 | -0.39 | 0.64 | 0.98 | -0.28 | 0.74 | 0.99 | -0.17 | 0.84 | 0.99 |
| Intestinimonas                | 0.19  | 0.79 | 0.95 | 0.02  | 0.97 | 0.99 | 0.14  | 0.85 | 0.98 | -0.02 | 0.98 | 0.99 | 0.16  | 0.83 | 0.99 |
| Lachnoclostridium             | -2.21 | 0.16 | 0.80 | -1.58 | 0.31 | 0.91 | -0.86 | 0.60 | 0.98 | -0.75 | 0.65 | 0.99 | -0.59 | 0.72 | 0.99 |
| Lachnospira                   | 0.61  | 0.42 | 0.85 | 0.18  | 0.81 | 0.99 | 0.03  | 0.97 | 1.00 | 0.11  | 0.89 | 0.99 | 0.07  | 0.93 | 0.99 |
| Lachnospiraceae_FCS020_group  | 2.28  | 0.01 | 0.70 | 1.88  | 0.03 | 0.60 | 1.69  | 0.06 | 0.94 | 1.71  | 0.05 | 0.83 | 1.58  | 0.08 | 0.84 |
| Lachnospiraceae_ND3007_group  | 0.35  | 0.52 | 0.86 | 0.18  | 0.74 | 0.99 | 0.01  | 0.99 | 1.00 | 0.08  | 0.88 | 0.99 | 0.01  | 0.99 | 0.99 |
| Lachnospiraceae_NK4A136_group | 0.07  | 0.93 | 0.98 | -0.28 | 0.73 | 0.99 | -0.71 | 0.42 | 0.98 | -0.64 | 0.46 | 0.95 | -0.70 | 0.43 | 0.96 |
| Lachnospiraceae_UCG.001       | -0.03 | 0.96 | 0.98 | -0.13 | 0.83 | 0.99 | -0.18 | 0.77 | 0.98 | -0.26 | 0.68 | 0.99 | -0.24 | 0.70 | 0.99 |
| Lachnospiraceae_UCG.004       | 0.52  | 0.40 | 0.85 | 0.47  | 0.44 | 0.91 | 0.62  | 0.33 | 0.94 | 0.67  | 0.29 | 0.94 | 0.46  | 0.47 | 0.96 |
| Lachnospiraceae_UCG.010       | 0.48  | 0.60 | 0.89 | 0.21  | 0.82 | 0.99 | -0.08 | 0.94 | 0.99 | -0.12 | 0.90 | 0.99 | -0.08 | 0.94 | 0.99 |
| Lactobacillus                 | 0.05  | 0.95 | 0.98 | 0.42  | 0.56 | 0.92 | 0.46  | 0.55 | 0.98 | 0.64  | 0.42 | 0.95 | 0.79  | 0.32 | 0.96 |
| Lactococcus                   | -0.09 | 0.93 | 0.98 | -0.10 | 0.92 | 0.99 | 0.06  | 0.95 | 0.99 | 0.02  | 0.98 | 0.99 | -0.16 | 0.89 | 0.99 |
| Marvinbryantia                | -0.58 | 0.34 | 0.82 | -0.68 | 0.26 | 0.91 | -0.87 | 0.17 | 0.94 | -0.87 | 0.17 | 0.83 | -0.80 | 0.21 | 0.96 |
| Megasphaera                   | -0.28 | 0.63 | 0.90 | -0.01 | 0.98 | 0.99 | 0.37  | 0.54 | 0.98 | 0.40  | 0.52 | 0.95 | 0.36  | 0.57 | 0.99 |
| Monoglobus                    | 0.92  | 0.27 | 0.82 | 0.76  | 0.35 | 0.91 | 0.84  | 0.33 | 0.94 | 0.81  | 0.34 | 0.94 | 0.73  | 0.40 | 0.96 |
| Moryella                      | 1.01  | 0.34 | 0.82 | 0.70  | 0.51 | 0.91 | 0.30  | 0.79 | 0.98 | 0.40  | 0.73 | 0.99 | 0.40  | 0.73 | 0.99 |
| Negativibacillus              | 0.93  | 0.15 | 0.80 | 1.10  | 0.08 | 0.71 | 0.93  | 0.16 | 0.94 | 0.90  | 0.17 | 0.83 | 0.83  | 0.22 | 0.96 |
| NK4A214_group                 | -0.12 | 0.82 | 0.95 | -0.20 | 0.69 | 0.99 | -0.40 | 0.46 | 0.98 | -0.45 | 0.40 | 0.95 | -0.43 | 0.43 | 0.96 |
| Odoribacter                   | 1.20  | 0.01 | 0.71 | 1.11  | 0.02 | 0.60 | 0.90  | 0.08 | 0.94 | 0.89  | 0.08 | 0.83 | 0.78  | 0.13 | 0.96 |
| Oscillibacter                 | -0.42 | 0.62 | 0.90 | -0.61 | 0.47 | 0.91 | -0.45 | 0.61 | 0.98 | -0.60 | 0.50 | 0.95 | -0.75 | 0.40 | 0.96 |
| Oscillospira                  | -0.15 | 0.90 | 0.98 | -0.08 | 0.94 | 0.99 | -0.20 | 0.87 | 0.98 | -0.23 | 0.85 | 0.99 | -0.20 | 0.87 | 0.99 |
| Oxalobacter                   | -0.56 | 0.52 | 0.86 | -1.08 | 0.21 | 0.91 | -1.39 | 0.13 | 0.94 | -1.41 | 0.13 | 0.83 | -1.40 | 0.13 | 0.96 |
| Paludicola                    | 0.02  | 0.98 | 0.98 | -0.20 | 0.82 | 0.99 | -0.70 | 0.45 | 0.98 | -0.88 | 0.34 | 0.94 | -0.70 | 0.46 | 0.96 |
| Parabacteroides               | 1.01  | 0.11 | 0.80 | 1.15  | 0.07 | 0.69 | 1.03  | 0.11 | 0.94 | 1.18  | 0.07 | 0.83 | 1.25  | 0.05 | 0.84 |
| Paraprevotella                | 0.49  | 0.32 | 0.82 | 0.56  | 0.25 | 0.91 | 0.46  | 0.37 | 0.95 | 0.45  | 0.38 | 0.95 | 0.45  | 0.37 | 0.96 |
| Parasutterella                | 0.70  | 0.14 | 0.80 | 0.62  | 0.18 | 0.91 | 0.49  | 0.32 | 0.94 | 0.51  | 0.30 | 0.94 | 0.34  | 0.49 | 0.96 |
| Peptococcus                   | 1.34  | 0.18 | 0.81 | 1.10  | 0.27 | 0.91 | 0.24  | 0.82 | 0.98 | 0.18  | 0.86 | 0.99 | 0.35  | 0.74 | 0.99 |
| Phascolarctobacterium         | 0.82  | 0.07 | 0.74 | 0.89  | 0.05 | 0.63 | 0.95  | 0.04 | 0.94 | 0.91  | 0.05 | 0.83 | 0.93  | 0.05 | 0.84 |
| Phocea                        | 0.24  | 0.83 | 0.95 | 0.19  | 0.86 | 0.99 | 0.37  | 0.75 | 0.98 | 0.47  | 0.68 | 0.99 | 0.46  | 0.69 | 0.99 |
| Prevotella                    | 0.12  | 0.80 | 0.95 | 0.34  | 0.46 | 0.91 | 0.21  | 0.66 | 0.98 | 0.23  | 0.62 | 0.99 | 0.24  | 0.60 | 0.99 |
| Romboutsia                    | -0.03 | 0.97 | 0.98 | 0.07  | 0.93 | 0.99 | 0.06  | 0.93 | 0.99 | 0.13  | 0.87 | 0.99 | 0.06  | 0.94 | 0.99 |
| Roseburia                     | -0.27 | 0.75 | 0.95 | -0.25 | 0.75 | 0.99 | -0.34 | 0.69 | 0.98 | -0.26 | 0.76 | 0.99 | -0.14 | 0.87 | 0.99 |
| Ruminococcus                  | 0.49  | 0.38 | 0.85 | 0.22  | 0.69 | 0.99 | 0.09  | 0.87 | 0.98 | 0.08  | 0.89 | 0.99 | 0.01  | 0.99 | 0.99 |
| Sellimonas                    | 1.18  | 0.15 | 0.80 | 0.87  | 0.28 | 0.91 | 0.58  | 0.49 | 0.98 | 0.46  | 0.58 | 0.98 | 0.48  | 0.57 | 0.99 |
| Shuttleworthia                | -0.23 | 0.76 | 0.95 | -0.80 | 0.30 | 0.91 | -1.02 | 0.21 | 0.94 | -1.13 | 0.16 | 0.83 | -1.03 | 0.21 | 0.96 |
| Slackia                       | 0.73  | 0.29 | 0.82 | 0.81  | 0.24 | 0.91 | 0.75  | 0.29 | 0.94 | 0.84  | 0.24 | 0.94 | 0.67  | 0.35 | 0.96 |
| Streptococcus                 | -1.63 | 0.09 | 0.78 | -1.57 | 0.10 | 0.73 | -0.80 | 0.43 | 0.98 | -0.76 | 0.45 | 0.95 | -0.72 | 0.48 | 0.96 |
| Subdoligranulum               | 1.12  | 0.11 | 0.80 | 0.93  | 0.18 | 0.91 | 0.24  | 0.74 | 0.98 | 0.27  | 0.72 | 0.99 | 0.21  | 0.78 | 0.99 |
| Sutterella                    | -0.13 | 0.75 | 0.95 | 0.09  | 0.84 | 0.99 | -0.11 | 0.80 | 0.98 | -0.10 | 0.83 | 0.99 | -0.07 | 0.87 | 0.99 |
| TM7x                          | -1.05 | 0.28 | 0.82 | -1.31 | 0.17 | 0.91 | -0.95 | 0.34 | 0.95 | -0.93 | 0.35 | 0.94 | -0.89 | 0.37 | 0.96 |
| Turicibacter                  | 0.70  | 0.53 | 0.86 | 0.80  | 0.46 | 0.91 | 1.09  | 0.33 | 0.94 | 1.06  | 0.34 | 0.94 | 0.73  | 0.52 | 0.96 |
| Tuzzerella                    | -0.12 | 0.86 | 0.96 | -0.01 | 0.99 | 0.99 | -0.20 | 0.78 | 0.98 | -0.27 | 0.70 | 0.99 | -0.43 | 0.55 | 0.99 |
| UBA1819                       | 0.73  | 0.48 | 0.85 | 0.70  | 0.49 | 0.91 | 0.93  | 0.38 | 0.95 | 0.74  | 0.49 | 0.95 | 0.77  | 0.48 | 0.96 |
| UCG.002                       | 0.66  | 0.17 | 0.81 | 0.53  | 0.27 | 0.91 | 0.11  | 0.84 | 0.98 | 0.07  | 0.90 | 0.99 | 0.02  | 0.97 | 0.99 |
| UCG.003                       | 1.04  | 0.07 | 0.74 | 0.89  | 0.12 | 0.81 | 0.72  | 0.23 | 0.94 | 0.74  | 0.22 | 0.94 | 0.62  | 0.31 | 0.96 |
| UCG.005                       | 0.75  | 0.24 | 0.82 | 0.55  | 0.39 | 0.91 | 0.28  | 0.68 | 0.98 | 0.21  | 0.76 | 0.99 | 0.09  | 0.89 | 0.99 |
| UCG.009                       | -0.28 | 0.78 | 0.95 | -0.76 | 0.44 | 0.91 | -1.31 | 0.20 | 0.94 | -1.36 | 0.19 | 0.83 | -1.35 | 0.19 | 0.96 |
| Veillonella                   | -0.53 | 0.47 | 0.85 | -0.58 | 0.43 | 0.91 | -0.12 | 0.88 | 0.98 | -0.04 | 0.95 | 0.99 | 0.03  | 0.97 | 0.99 |

Multivariable-adjusted regression models adjusted for:

Model 1: sequencing batch, age, race, gender, study center

Model 2: Model 1, with education

Model 3: Model 2, with physical activity, diet score, medication use, and smoking

Model 4: Model 3 with BMI

Model 5: Model 4 with hypertension and diabetes

eTable 59: Multivariable-adjusted regression coefficients, p-values, and false discovery rate (FDR)-adjusted p-values for genera among female participants with respect to MOCA.

|                               | Model1 |         |      | Model2 |         |      | Model3 |         |      | Model4 |         |      | Model5 |         |      |
|-------------------------------|--------|---------|------|--------|---------|------|--------|---------|------|--------|---------|------|--------|---------|------|
|                               | beta   | p-value | FDR  | beta   | p-value | FDR  | beta   | p-value | FDR  | beta   | p-value | FDR  | beta   | p-value | FDR  |
| Acetanaerobacterium           | -0.17  | 0.63    | 0.89 | 0.09   | 0.79    | 0.92 | 0.14   | 0.69    | 0.89 | 0.12   | 0.73    | 0.92 | 0.13   | 0.71    | 0.93 |
| Acidaminococcus               | -0.31  | 0.01    | 0.15 | -0.20  | 0.09    | 0.50 | -0.11  | 0.37    | 0.65 | -0.11  | 0.38    | 0.67 | -0.11  | 0.37    | 0.67 |
| Actinomyces                   | -0.07  | 0.83    | 0.94 | 0.07   | 0.82    | 0.92 | 0.27   | 0.39    | 0.67 | 0.28   | 0.37    | 0.67 | 0.40   | 0.21    | 0.58 |
| Adlercreutzia                 | 0.03   | 0.88    | 0.95 | -0.07  | 0.69    | 0.92 | -0.14  | 0.47    | 0.72 | -0.16  | 0.43    | 0.71 | -0.15  | 0.44    | 0.72 |
| Agathobacter                  | -0.34  | 0.14    | 0.41 | -0.30  | 0.16    | 0.63 | -0.36  | 0.10    | 0.49 | -0.35  | 0.12    | 0.53 | -0.32  | 0.16    | 0.50 |
| Akkermansia                   | 0.30   | 0.01    | 0.15 | 0.25   | 0.03    | 0.37 | 0.26   | 0.03    | 0.36 | 0.25   | 0.03    | 0.38 | 0.24   | 0.04    | 0.40 |
| Alistipes                     | 0.16   | 0.43    | 0.71 | 0.16   | 0.38    | 0.70 | 0.13   | 0.50    | 0.74 | 0.12   | 0.51    | 0.75 | 0.11   | 0.55    | 0.81 |
| Anaerofilum                   | 0.36   | 0.18    | 0.47 | 0.05   | 0.86    | 0.94 | 0.06   | 0.83    | 0.96 | 0.04   | 0.87    | 0.98 | 0.09   | 0.74    | 0.94 |
| Anaerostipes                  | 0.12   | 0.68    | 0.89 | 0.06   | 0.82    | 0.92 | 0.01   | 0.98    | 0.98 | 0.00   | 0.99    | 0.99 | 0.05   | 0.84    | 0.99 |
| Anaerotruncus                 | 0.61   | 0.01    | 0.15 | 0.56   | 0.02    | 0.37 | 0.66   | 0.01    | 0.23 | 0.64   | 0.01    | 0.30 | 0.64   | 0.01    | 0.32 |
| Angelakisella                 | 0.43   | 0.24    | 0.52 | 0.23   | 0.50    | 0.77 | 0.44   | 0.22    | 0.60 | 0.42   | 0.25    | 0.64 | 0.41   | 0.26    | 0.62 |
| Bacteroides                   | 0.13   | 0.79    | 0.93 | -0.04  | 0.93    | 0.94 | -0.13  | 0.78    | 0.94 | -0.11  | 0.82    | 0.95 | -0.03  | 0.94    | 1.00 |
| Barnesiella                   | 0.14   | 0.22    | 0.50 | 0.13   | 0.23    | 0.70 | 0.18   | 0.11    | 0.49 | 0.18   | 0.11    | 0.53 | 0.21   | 0.07    | 0.41 |
| Bifidobacterium               | -0.10  | 0.54    | 0.83 | 0.03   | 0.82    | 0.92 | 0.02   | 0.88    | 0.98 | 0.02   | 0.89    | 0.98 | 0.01   | 0.95    | 1.00 |
| Bilophila                     | 0.20   | 0.20    | 0.48 | 0.21   | 0.15    | 0.63 | 0.20   | 0.17    | 0.57 | 0.20   | 0.18    | 0.58 | 0.22   | 0.14    | 0.50 |
| Blautia                       | 0.10   | 0.86    | 0.94 | 0.14   | 0.78    | 0.92 | 0.29   | 0.57    | 0.80 | 0.27   | 0.59    | 0.83 | 0.58   | 0.28    | 0.62 |
| Butyricoccus                  | 0.14   | 0.69    | 0.89 | -0.12  | 0.72    | 0.92 | -0.33  | 0.34    | 0.63 | -0.32  | 0.36    | 0.67 | -0.32  | 0.35    | 0.65 |
| Butyricimonas                 | 0.29   | 0.03    | 0.17 | 0.23   | 0.06    | 0.41 | 0.26   | 0.04    | 0.36 | 0.27   | 0.04    | 0.38 | 0.24   | 0.07    | 0.41 |
| CAG.56                        | -0.10  | 0.52    | 0.83 | -0.14  | 0.34    | 0.70 | -0.12  | 0.44    | 0.71 | -0.12  | 0.45    | 0.73 | -0.08  | 0.63    | 0.86 |
| Candidatus_Soleaferrea        | 0.30   | 0.37    | 0.66 | 0.28   | 0.38    | 0.70 | 0.45   | 0.16    | 0.56 | 0.44   | 0.16    | 0.56 | 0.50   | 0.12    | 0.43 |
| Caproiciproducens             | 0.24   | 0.36    | 0.66 | 0.29   | 0.24    | 0.70 | 0.24   | 0.34    | 0.63 | 0.23   | 0.36    | 0.67 | 0.24   | 0.34    | 0.65 |
| Christensenellaceae_R.7_group | 0.30   | 0.02    | 0.17 | 0.21   | 0.10    | 0.50 | 0.21   | 0.12    | 0.49 | 0.20   | 0.14    | 0.53 | 0.23   | 0.10    | 0.42 |
| Clostridium_sensu_stricto_1   | 0.00   | 1.00    | 1.00 | -0.02  | 0.88    | 0.94 | -0.07  | 0.68    | 0.89 | -0.07  | 0.68    | 0.90 | -0.07  | 0.69    | 0.92 |
| Colidextribacter              | -0.14  | 0.68    | 0.89 | -0.18  | 0.58    | 0.81 | -0.10  | 0.76    | 0.94 | -0.13  | 0.71    | 0.92 | 0.00   | 1.00    | 1.00 |
| Collinsella                   | -0.12  | 0.42    | 0.71 | 0.09   | 0.52    | 0.77 | 0.09   | 0.52    | 0.75 | 0.10   | 0.47    | 0.73 | 0.11   | 0.46    | 0.72 |
| Coprobacter                   | 0.05   | 0.78    | 0.93 | -0.05  | 0.74    | 0.92 | -0.08  | 0.64    | 0.87 | -0.08  | 0.62    | 0.85 | -0.05  | 0.78    | 0.98 |
| Coprococcus                   | -0.30  | 0.08    | 0.29 | -0.20  | 0.21    | 0.66 | -0.18  | 0.27    | 0.63 | -0.17  | 0.28    | 0.67 | -0.15  | 0.36    | 0.65 |
| Defluviitaleaceae_UCG.011     | 0.54   | 0.03    | 0.17 | 0.40   | 0.09    | 0.50 | 0.42   | 0.08    | 0.42 | 0.41   | 0.10    | 0.49 | 0.35   | 0.16    | 0.50 |
| Desulfovibrio                 | -0.13  | 0.41    | 0.71 | -0.09  | 0.52    | 0.77 | -0.01  | 0.94    | 0.98 | -0.02  | 0.91    | 0.98 | -0.03  | 0.87    | 1.00 |
| Dialister                     | -0.13  | 0.25    | 0.53 | -0.14  | 0.20    | 0.66 | -0.17  | 0.14    | 0.52 | -0.17  | 0.14    | 0.53 | -0.13  | 0.24    | 0.62 |
| DNF00809                      | 0.39   | 0.17    | 0.46 | 0.36   | 0.18    | 0.63 | 0.49   | 0.08    | 0.42 | 0.48   | 0.08    | 0.47 | 0.49   | 0.07    | 0.41 |
| Dorea                         | -0.11  | 0.60    | 0.86 | 0.02   | 0.92    | 0.94 | 0.03   | 0.87    | 0.98 | 0.05   | 0.83    | 0.95 | 0.03   | 0.90    | 1.00 |
| DTU089                        | 0.32   | 0.17    | 0.46 | 0.25   | 0.26    | 0.70 | 0.35   | 0.12    | 0.49 | 0.34   | 0.13    | 0.53 | 0.37   | 0.11    | 0.42 |
| Eggerthella                   | -0.05  | 0.82    | 0.94 | -0.07  | 0.75    | 0.92 | -0.06  | 0.77    | 0.94 | -0.07  | 0.73    | 0.92 | 0.00   | 1.00    | 1.00 |
| Eisenbergiella                | 0.40   | 0.07    | 0.29 | 0.38   | 0.06    | 0.41 | 0.38   | 0.07    | 0.42 | 0.36   | 0.08    | 0.47 | 0.39   | 0.06    | 0.41 |
| Erysipelatoclostridium        | 0.07   | 0.76    | 0.93 | 0.05   | 0.82    | 0.92 | 0.02   | 0.93    | 0.98 | 0.00   | 0.99    | 0.99 | 0.05   | 0.84    | 0.99 |
| Erysipelotrichaceae_UCG.003   | 0.09   | 0.60    | 0.86 | 0.08   | 0.61    | 0.85 | 0.04   | 0.81    | 0.95 | 0.04   | 0.83    | 0.95 | 0.04   | 0.81    | 0.98 |
| Escherichia_Shigella          | -0.09  | 0.57    | 0.85 | -0.04  | 0.79    | 0.92 | 0.01   | 0.92    | 0.98 | 0.02   | 0.90    | 0.98 | -0.02  | 0.90    | 1.00 |
| Faecalibacterium              | 0.26   | 0.23    | 0.52 | 0.10   | 0.63    | 0.87 | -0.02  | 0.92    | 0.98 | -0.01  | 0.96    | 0.99 | 0.01   | 0.98    | 1.00 |
| Family_XIII_AD3011_group      | 0.28   | 0.19    | 0.48 | 0.21   | 0.30    | 0.70 | 0.26   | 0.23    | 0.60 | 0.25   | 0.25    | 0.64 | 0.24   | 0.28    | 0.62 |
| Family_XIII_UCG.001           | 0.31   | 0.26    | 0.53 | 0.23   | 0.37    | 0.70 | 0.24   | 0.37    | 0.65 | 0.22   | 0.41    | 0.69 | 0.20   | 0.47    | 0.72 |
| Flavonifractor                | 0.15   | 0.54    | 0.83 | 0.14   | 0.54    | 0.77 | 0.23   | 0.33    | 0.63 | 0.23   | 0.33    | 0.67 | 0.30   | 0.20    | 0.55 |
| Frisingicoccus                | 0.44   | 0.01    | 0.15 | 0.31   | 0.06    | 0.41 | 0.23   | 0.19    | 0.58 | 0.21   | 0.22    | 0.64 | 0.25   | 0.16    | 0.50 |
| Fusicatenibacter              | -0.04  | 0.79    | 0.93 | -0.12  | 0.42    | 0.72 | -0.17  | 0.29    | 0.63 | -0.16  | 0.33    | 0.67 | -0.16  | 0.33    | 0.65 |
| Fusobacterium                 | -0.63  | 0.03    | 0.17 | -0.55  | 0.04    | 0.37 | -0.48  | 0.08    | 0.42 | -0.50  | 0.07    | 0.46 | -0.54  | 0.05    | 0.41 |
| GCA.900066575                 | 0.40   | 0.11    | 0.33 | 0.22   | 0.35    | 0.70 | 0.18   | 0.45    | 0.72 | 0.17   | 0.50    | 0.74 | 0.21   | 0.40    | 0.68 |
| GCA.900066755                 | -0.20  | 0.60    | 0.86 | -0.16  | 0.66    | 0.89 | -0.07  | 0.86    | 0.97 | -0.10  | 0.79    | 0.94 | 0.04   | 0.92    | 1.00 |
| Gordonibacter                 | 0.40   | 0.09    | 0.30 | 0.33   | 0.14    | 0.63 | 0.24   | 0.30    | 0.63 | 0.22   | 0.35    | 0.67 | 0.23   | 0.31    | 0.65 |
| Granulicatella                | -0.07  | 0.81    | 0.94 | -0.10  | 0.74    | 0.92 | -0.10  | 0.75    | 0.94 | -0.08  | 0.79    | 0.94 | -0.05  | 0.88    | 1.00 |
| Haemophilus                   | 0.09   | 0.64    | 0.89 | -0.03  | 0.87    | 0.94 | -0.16  | 0.39    | 0.67 | -0.16  | 0.39    | 0.67 | -0.13  | 0.47    | 0.72 |
| Harryflintia                  | 0.31   | 0.25    | 0.53 | 0.31   | 0.21    | 0.66 | 0.46   | 0.08    | 0.42 | 0.44   | 0.09    | 0.49 | 0.47   | 0.08    | 0.41 |
| Holdemania                    | 0.33   | 0.43    | 0.71 | 0.27   | 0.49    | 0.77 | 0.21   | 0.60    | 0.82 | 0.19   | 0.63    | 0.85 | 0.21   | 0.60    | 0.86 |

|                              |       |      |      |       |      |      |       |      |      |       |      |      |       |      |      |
|------------------------------|-------|------|------|-------|------|------|-------|------|------|-------|------|------|-------|------|------|
| Hungatella                   | -0.04 | 0.84 | 0.94 | 0.03  | 0.88 | 0.94 | 0.15  | 0.47 | 0.72 | 0.15  | 0.47 | 0.73 | 0.14  | 0.50 | 0.76 |
| Hydrogenoanaerobacterium     | 0.38  | 0.08 | 0.29 | 0.20  | 0.33 | 0.70 | 0.22  | 0.32 | 0.63 | 0.20  | 0.37 | 0.67 | 0.24  | 0.28 | 0.62 |
| Incertae_Sedis               | 0.46  | 0.20 | 0.48 | 0.45  | 0.17 | 0.63 | 0.69  | 0.05 | 0.36 | 0.68  | 0.05 | 0.40 | 0.75  | 0.03 | 0.35 |
| Intestinibacter              | -0.20 | 0.36 | 0.66 | -0.13 | 0.53 | 0.77 | -0.16 | 0.44 | 0.71 | -0.15 | 0.49 | 0.74 | -0.08 | 0.73 | 0.94 |
| Intestinimonas               | 0.47  | 0.02 | 0.15 | 0.38  | 0.04 | 0.37 | 0.42  | 0.03 | 0.36 | 0.40  | 0.04 | 0.38 | 0.45  | 0.02 | 0.32 |
| Lachnoclostridium            | -0.75 | 0.07 | 0.29 | -0.38 | 0.34 | 0.70 | -0.31 | 0.46 | 0.72 | -0.29 | 0.48 | 0.74 | -0.30 | 0.47 | 0.72 |
| Lachnospira                  | 0.29  | 0.15 | 0.44 | 0.06  | 0.75 | 0.92 | -0.08 | 0.68 | 0.89 | -0.07 | 0.72 | 0.92 | -0.02 | 0.93 | 1.00 |
| Lachnospiraceae_FCS020_group | 0.60  | 0.01 | 0.15 | 0.36  | 0.09 | 0.50 | 0.30  | 0.18 | 0.57 | 0.31  | 0.17 | 0.56 | 0.30  | 0.18 | 0.50 |
| Lachnospiraceae_ND3007_grou  | -0.06 | 0.68 | 0.89 | -0.16 | 0.25 | 0.70 | -0.16 | 0.27 | 0.63 | -0.15 | 0.30 | 0.67 | -0.13 | 0.38 | 0.67 |
| Lachnospiraceae_NK4A136_gro  | -0.02 | 0.93 | 0.96 | -0.21 | 0.30 | 0.70 | -0.43 | 0.05 | 0.36 | -0.42 | 0.05 | 0.40 | -0.39 | 0.08 | 0.41 |
| Lachnospiraceae_UCG.001      | 0.15  | 0.34 | 0.65 | 0.10  | 0.50 | 0.77 | -0.02 | 0.91 | 0.98 | -0.03 | 0.85 | 0.96 | 0.01  | 0.96 | 1.00 |
| Lachnospiraceae_UCG.004      | 0.15  | 0.37 | 0.67 | 0.11  | 0.47 | 0.77 | 0.01  | 0.95 | 0.98 | 0.02  | 0.92 | 0.98 | -0.01 | 0.97 | 1.00 |
| Lachnospiraceae_UCG.010      | -0.03 | 0.92 | 0.96 | -0.17 | 0.46 | 0.77 | -0.24 | 0.32 | 0.63 | -0.24 | 0.31 | 0.67 | -0.24 | 0.32 | 0.65 |
| Lactobacillus                | -0.34 | 0.08 | 0.29 | -0.16 | 0.37 | 0.70 | -0.05 | 0.80 | 0.95 | -0.03 | 0.90 | 0.98 | -0.05 | 0.80 | 0.98 |
| Lactococcus                  | 0.19  | 0.50 | 0.81 | 0.17  | 0.51 | 0.77 | 0.24  | 0.37 | 0.65 | 0.24  | 0.38 | 0.67 | 0.26  | 0.35 | 0.65 |
| Marvinbryantia               | 0.03  | 0.86 | 0.94 | -0.01 | 0.93 | 0.94 | 0.05  | 0.76 | 0.94 | 0.05  | 0.76 | 0.94 | 0.09  | 0.58 | 0.84 |
| Megasphaera                  | -0.26 | 0.09 | 0.30 | -0.13 | 0.37 | 0.70 | -0.01 | 0.97 | 0.98 | 0.00  | 0.99 | 0.99 | -0.03 | 0.87 | 1.00 |
| Monoglobus                   | 0.50  | 0.02 | 0.17 | 0.42  | 0.04 | 0.37 | 0.45  | 0.04 | 0.36 | 0.44  | 0.04 | 0.38 | 0.51  | 0.02 | 0.32 |
| Moryella                     | 0.10  | 0.73 | 0.92 | -0.09 | 0.74 | 0.92 | -0.02 | 0.95 | 0.98 | 0.00  | 0.99 | 0.99 | 0.00  | 1.00 | 1.00 |
| Negativibacillus             | 0.04  | 0.82 | 0.94 | 0.14  | 0.40 | 0.71 | 0.26  | 0.12 | 0.49 | 0.25  | 0.13 | 0.53 | 0.30  | 0.08 | 0.41 |
| NK4A214_group                | 0.17  | 0.21 | 0.48 | 0.12  | 0.33 | 0.70 | 0.16  | 0.23 | 0.60 | 0.15  | 0.26 | 0.64 | 0.18  | 0.17 | 0.50 |
| Odoribacter                  | 0.18  | 0.17 | 0.46 | 0.11  | 0.35 | 0.70 | 0.13  | 0.32 | 0.63 | 0.13  | 0.33 | 0.67 | 0.11  | 0.39 | 0.68 |
| Oscillibacter                | 0.49  | 0.03 | 0.17 | 0.41  | 0.06 | 0.41 | 0.46  | 0.03 | 0.36 | 0.45  | 0.04 | 0.38 | 0.50  | 0.02 | 0.32 |
| Oscillospira                 | 0.13  | 0.67 | 0.89 | 0.19  | 0.52 | 0.77 | 0.37  | 0.22 | 0.60 | 0.36  | 0.23 | 0.64 | 0.50  | 0.10 | 0.42 |
| Oxalobacter                  | 0.47  | 0.04 | 0.21 | 0.21  | 0.34 | 0.70 | 0.15  | 0.52 | 0.75 | 0.15  | 0.53 | 0.76 | 0.11  | 0.63 | 0.86 |
| Paludicola                   | 0.40  | 0.09 | 0.30 | 0.30  | 0.18 | 0.63 | 0.29  | 0.21 | 0.60 | 0.27  | 0.24 | 0.64 | 0.33  | 0.17 | 0.50 |
| Parabacteroides              | 0.07  | 0.68 | 0.89 | 0.15  | 0.35 | 0.70 | 0.21  | 0.18 | 0.57 | 0.24  | 0.14 | 0.53 | 0.26  | 0.11 | 0.42 |
| Paraprevotella               | 0.01  | 0.93 | 0.96 | 0.04  | 0.72 | 0.92 | -0.06 | 0.65 | 0.87 | -0.06 | 0.64 | 0.86 | -0.03 | 0.81 | 0.98 |
| Parasutterella               | 0.33  | 0.01 | 0.15 | 0.28  | 0.02 | 0.37 | 0.26  | 0.03 | 0.36 | 0.27  | 0.03 | 0.38 | 0.25  | 0.04 | 0.40 |
| Peptococcus                  | 0.66  | 0.01 | 0.15 | 0.53  | 0.04 | 0.37 | 0.57  | 0.03 | 0.36 | 0.57  | 0.03 | 0.38 | 0.62  | 0.02 | 0.32 |
| Phascolarctobacterium        | 0.20  | 0.10 | 0.31 | 0.23  | 0.04 | 0.37 | 0.23  | 0.04 | 0.36 | 0.23  | 0.05 | 0.40 | 0.19  | 0.11 | 0.42 |
| Phoceia                      | -0.33 | 0.27 | 0.54 | -0.36 | 0.20 | 0.66 | -0.39 | 0.18 | 0.57 | -0.38 | 0.19 | 0.60 | -0.33 | 0.26 | 0.62 |
| Prevotella                   | -0.22 | 0.07 | 0.29 | -0.11 | 0.33 | 0.70 | -0.13 | 0.27 | 0.63 | -0.12 | 0.29 | 0.67 | -0.15 | 0.22 | 0.58 |
| Romboutsia                   | -0.22 | 0.28 | 0.54 | -0.19 | 0.32 | 0.70 | -0.16 | 0.42 | 0.69 | -0.15 | 0.45 | 0.73 | -0.12 | 0.54 | 0.80 |
| Roseburia                    | 0.00  | 1.00 | 1.00 | 0.02  | 0.93 | 0.94 | 0.04  | 0.84 | 0.96 | 0.06  | 0.79 | 0.94 | 0.10  | 0.66 | 0.89 |
| Ruminococcus                 | 0.25  | 0.08 | 0.29 | 0.12  | 0.40 | 0.71 | 0.14  | 0.32 | 0.63 | 0.14  | 0.33 | 0.67 | 0.17  | 0.25 | 0.62 |
| Sellimonas                   | 0.04  | 0.85 | 0.94 | -0.14 | 0.49 | 0.77 | -0.23 | 0.28 | 0.63 | -0.25 | 0.24 | 0.64 | -0.21 | 0.33 | 0.65 |
| Shuttleworthia               | 0.59  | 0.00 | 0.15 | 0.31  | 0.10 | 0.51 | 0.30  | 0.14 | 0.52 | 0.29  | 0.15 | 0.55 | 0.35  | 0.09 | 0.42 |
| Slackia                      | -0.02 | 0.89 | 0.95 | 0.00  | 1.00 | 1.00 | 0.04  | 0.80 | 0.95 | 0.06  | 0.75 | 0.93 | 0.04  | 0.81 | 0.98 |
| Streptococcus                | 0.20  | 0.44 | 0.72 | 0.21  | 0.38 | 0.70 | 0.30  | 0.23 | 0.60 | 0.31  | 0.22 | 0.64 | 0.35  | 0.17 | 0.50 |
| Subdoligranulum              | 0.42  | 0.02 | 0.17 | 0.33  | 0.06 | 0.41 | 0.38  | 0.04 | 0.36 | 0.38  | 0.04 | 0.38 | 0.42  | 0.02 | 0.32 |
| Sutterella                   | -0.38 | 0.00 | 0.07 | -0.28 | 0.01 | 0.37 | -0.34 | 0.00 | 0.18 | -0.34 | 0.00 | 0.21 | -0.36 | 0.00 | 0.11 |
| TM7x                         | 0.16  | 0.54 | 0.83 | 0.03  | 0.90 | 0.94 | -0.01 | 0.98 | 0.98 | 0.00  | 0.99 | 0.99 | 0.09  | 0.72 | 0.93 |
| Turicibacter                 | 0.00  | 0.99 | 1.00 | 0.04  | 0.87 | 0.94 | 0.27  | 0.34 | 0.63 | 0.26  | 0.35 | 0.67 | 0.22  | 0.44 | 0.72 |
| Tuzzerella                   | 0.06  | 0.74 | 0.92 | 0.14  | 0.41 | 0.72 | 0.11  | 0.54 | 0.76 | 0.10  | 0.58 | 0.81 | 0.09  | 0.61 | 0.86 |
| UBA1819                      | 0.61  | 0.03 | 0.17 | 0.61  | 0.02 | 0.37 | 0.78  | 0.00 | 0.18 | 0.76  | 0.00 | 0.24 | 0.85  | 0.00 | 0.11 |
| UCG.002                      | 0.33  | 0.01 | 0.15 | 0.26  | 0.03 | 0.37 | 0.21  | 0.12 | 0.49 | 0.20  | 0.13 | 0.53 | 0.22  | 0.10 | 0.42 |
| UCG.003                      | 0.05  | 0.76 | 0.93 | -0.04 | 0.79 | 0.92 | -0.10 | 0.51 | 0.75 | -0.10 | 0.52 | 0.76 | -0.12 | 0.45 | 0.72 |
| UCG.005                      | 0.34  | 0.04 | 0.21 | 0.22  | 0.16 | 0.63 | 0.18  | 0.29 | 0.63 | 0.17  | 0.32 | 0.67 | 0.18  | 0.30 | 0.65 |
| UCG.009                      | 0.48  | 0.07 | 0.29 | 0.22  | 0.38 | 0.70 | 0.27  | 0.29 | 0.63 | 0.26  | 0.31 | 0.67 | 0.29  | 0.27 | 0.62 |
| Veillonella                  | -0.22 | 0.27 | 0.54 | -0.26 | 0.15 | 0.63 | -0.36 | 0.06 | 0.42 | -0.35 | 0.07 | 0.46 | -0.36 | 0.07 | 0.41 |

Multivariable-adjusted regression models adjusted for:

Model 1: sequencing batch, age, race, gender, study center

Model 2: Model 1, with education

Model 3: Model 2, with physical activity, diet score, medication use, and smoking

Model 4: Model 3 with BMI

Model 5: Model 4 with hypertension and diabetes

eTable 60: Multivariable-adjusted regression coefficients, p-values, and false discovery rate (FDR)-adjusted p-values for genera among female participants with respect to PC (1st).

|                               | Model1 |         |      | Model2 |         |      | Model3 |         |      | Model4 |         |      | Model5 |         |      |
|-------------------------------|--------|---------|------|--------|---------|------|--------|---------|------|--------|---------|------|--------|---------|------|
|                               | beta   | p-value | FDR  | beta   | p-value | FDR  | beta   | p-value | FDR  | beta   | p-value | FDR  | beta   | p-value | FDR  |
| Acetanaerobacterium           | -0.04  | 0.82    | 0.91 | 0.08   | 0.62    | 0.84 | 0.08   | 0.64    | 0.91 | 0.05   | 0.76    | 0.99 | 0.04   | 0.83    | 0.94 |
| Acidaminococcus               | -0.16  | 0.01    | 0.08 | -0.11  | 0.05    | 0.29 | -0.07  | 0.23    | 0.74 | -0.07  | 0.23    | 0.83 | -0.08  | 0.18    | 0.80 |
| Actinomyces                   | -0.16  | 0.30    | 0.62 | -0.10  | 0.49    | 0.76 | 0.00   | 1.00    | 1.00 | 0.02   | 0.91    | 0.99 | 0.05   | 0.73    | 0.94 |
| Adlercreutzia                 | 0.13   | 0.18    | 0.43 | 0.08   | 0.36    | 0.69 | 0.05   | 0.60    | 0.91 | 0.03   | 0.74    | 0.99 | 0.02   | 0.84    | 0.94 |
| Agathobacter                  | -0.11  | 0.32    | 0.62 | -0.10  | 0.36    | 0.69 | -0.14  | 0.20    | 0.74 | -0.12  | 0.28    | 0.83 | -0.10  | 0.36    | 0.87 |
| Akkermansia                   | 0.16   | 0.01    | 0.08 | 0.13   | 0.01    | 0.20 | 0.13   | 0.02    | 0.51 | 0.12   | 0.03    | 0.59 | 0.12   | 0.04    | 0.64 |
| Alistipes                     | 0.09   | 0.34    | 0.63 | 0.09   | 0.30    | 0.69 | 0.05   | 0.63    | 0.91 | 0.04   | 0.67    | 0.99 | 0.03   | 0.73    | 0.94 |
| Anaerofilum                   | 0.33   | 0.01    | 0.09 | 0.19   | 0.12    | 0.44 | 0.19   | 0.15    | 0.74 | 0.17   | 0.20    | 0.83 | 0.19   | 0.15    | 0.80 |
| Anaerostipes                  | -0.07  | 0.60    | 0.81 | -0.10  | 0.45    | 0.76 | -0.11  | 0.39    | 0.76 | -0.12  | 0.37    | 0.83 | -0.12  | 0.37    | 0.87 |
| Anaerotruncus                 | 0.25   | 0.04    | 0.16 | 0.22   | 0.05    | 0.29 | 0.21   | 0.08    | 0.58 | 0.17   | 0.15    | 0.83 | 0.16   | 0.18    | 0.80 |
| Angelakisella                 | 0.24   | 0.16    | 0.40 | 0.15   | 0.35    | 0.69 | 0.22   | 0.21    | 0.74 | 0.19   | 0.27    | 0.83 | 0.18   | 0.31    | 0.87 |
| Bacteroides                   | -0.08  | 0.75    | 0.88 | -0.15  | 0.49    | 0.76 | -0.15  | 0.51    | 0.86 | -0.12  | 0.60    | 0.96 | -0.09  | 0.70    | 0.94 |
| Barnesiella                   | 0.18   | 0.00    | 0.04 | 0.17   | 0.00    | 0.10 | 0.18   | 0.00    | 0.13 | 0.18   | 0.00    | 0.13 | 0.20   | 0.00    | 0.05 |
| Bifidobacterium               | -0.04  | 0.57    | 0.79 | 0.01   | 0.85    | 0.95 | -0.01  | 0.89    | 1.00 | -0.01  | 0.88    | 0.99 | -0.02  | 0.83    | 0.94 |
| Bilophila                     | 0.12   | 0.10    | 0.27 | 0.13   | 0.07    | 0.34 | 0.10   | 0.16    | 0.74 | 0.10   | 0.18    | 0.83 | 0.09   | 0.23    | 0.87 |
| Blautia                       | -0.09  | 0.74    | 0.88 | -0.07  | 0.78    | 0.95 | 0.01   | 0.98    | 1.00 | -0.01  | 0.96    | 0.99 | 0.04   | 0.87    | 0.94 |
| Butyricoccus                  | 0.13   | 0.44    | 0.72 | 0.02   | 0.92    | 0.95 | -0.08  | 0.63    | 0.91 | -0.06  | 0.71    | 0.99 | -0.08  | 0.66    | 0.94 |
| Butyricimonas                 | 0.14   | 0.03    | 0.13 | 0.12   | 0.06    | 0.30 | 0.11   | 0.08    | 0.58 | 0.12   | 0.06    | 0.67 | 0.12   | 0.07    | 0.80 |
| CAG.56                        | 0.03   | 0.66    | 0.84 | 0.02   | 0.83    | 0.95 | -0.01  | 0.94    | 1.00 | 0.00   | 0.97    | 0.99 | 0.02   | 0.82    | 0.94 |
| Candidatus_Soleaferrea        | 0.12   | 0.45    | 0.72 | 0.11   | 0.47    | 0.76 | 0.16   | 0.31    | 0.74 | 0.15   | 0.33    | 0.83 | 0.15   | 0.34    | 0.87 |
| Caproiciproducens             | 0.16   | 0.21    | 0.48 | 0.18   | 0.13    | 0.45 | 0.11   | 0.38    | 0.75 | 0.10   | 0.45    | 0.87 | 0.07   | 0.56    | 0.92 |
| Christensenellaceae_R.7_group | 0.20   | 0.00    | 0.04 | 0.16   | 0.01    | 0.15 | 0.12   | 0.07    | 0.58 | 0.11   | 0.11    | 0.74 | 0.11   | 0.09    | 0.80 |
| Clostridium_sensu_stricto_1   | 0.03   | 0.70    | 0.85 | 0.02   | 0.78    | 0.95 | 0.01   | 0.95    | 1.00 | 0.01   | 0.95    | 0.99 | -0.01  | 0.93    | 0.96 |
| Colidextribacter              | -0.02  | 0.92    | 0.96 | -0.03  | 0.84    | 0.95 | -0.04  | 0.83    | 1.00 | -0.07  | 0.69    | 0.99 | -0.01  | 0.93    | 0.96 |
| Collinsella                   | -0.10  | 0.16    | 0.40 | -0.01  | 0.90    | 0.95 | 0.00   | 0.98    | 1.00 | 0.01   | 0.86    | 0.99 | 0.01   | 0.84    | 0.94 |
| Coprobacter                   | 0.02   | 0.81    | 0.90 | -0.03  | 0.74    | 0.93 | -0.07  | 0.36    | 0.74 | -0.08  | 0.32    | 0.83 | -0.07  | 0.38    | 0.87 |
| Coprococcus                   | -0.05  | 0.52    | 0.74 | -0.01  | 0.90    | 0.95 | -0.01  | 0.86    | 1.00 | -0.01  | 0.92    | 0.99 | 0.01   | 0.87    | 0.94 |
| Defluviitaleaceae_UCG.011     | 0.34   | 0.01    | 0.08 | 0.27   | 0.02    | 0.22 | 0.23   | 0.06    | 0.58 | 0.20   | 0.10    | 0.74 | 0.17   | 0.17    | 0.80 |
| Desulfovibrio                 | -0.02  | 0.78    | 0.88 | -0.01  | 0.93    | 0.95 | -0.01  | 0.87    | 1.00 | -0.02  | 0.81    | 0.99 | -0.02  | 0.81    | 0.94 |
| Dialister                     | -0.05  | 0.41    | 0.69 | -0.05  | 0.36    | 0.69 | -0.05  | 0.37    | 0.74 | -0.05  | 0.37    | 0.83 | -0.04  | 0.51    | 0.92 |
| DNF00809                      | 0.09   | 0.49    | 0.74 | 0.08   | 0.54    | 0.80 | 0.07   | 0.59    | 0.91 | 0.07   | 0.62    | 0.96 | 0.06   | 0.63    | 0.94 |
| Dorea                         | -0.11  | 0.31    | 0.62 | -0.05  | 0.64    | 0.84 | -0.07  | 0.51    | 0.86 | -0.05  | 0.61    | 0.96 | -0.06  | 0.54    | 0.92 |
| DTU089                        | 0.05   | 0.67    | 0.84 | 0.02   | 0.88    | 0.95 | 0.02   | 0.88    | 1.00 | 0.01   | 0.94    | 0.99 | 0.03   | 0.78    | 0.94 |
| Eggerthella                   | -0.01  | 0.89    | 0.94 | -0.02  | 0.83    | 0.95 | 0.00   | 0.97    | 1.00 | -0.02  | 0.85    | 0.99 | 0.01   | 0.93    | 0.96 |
| Eisenbergiella                | 0.11   | 0.28    | 0.59 | 0.10   | 0.29    | 0.69 | 0.09   | 0.35    | 0.74 | 0.06   | 0.53    | 0.96 | 0.08   | 0.46    | 0.92 |
| Erysipelatoclostridium        | 0.02   | 0.83    | 0.91 | 0.02   | 0.89    | 0.95 | 0.01   | 0.91    | 1.00 | -0.01  | 0.94    | 0.99 | 0.00   | 0.98    | 0.99 |
| Erysipelotrichaceae_UCG.003   | 0.07   | 0.37    | 0.63 | 0.07   | 0.36    | 0.69 | 0.03   | 0.70    | 0.94 | 0.03   | 0.76    | 0.99 | 0.02   | 0.82    | 0.94 |
| Escherichia_Shigella          | -0.04  | 0.58    | 0.79 | -0.02  | 0.79    | 0.95 | 0.01   | 0.85    | 1.00 | 0.02   | 0.80    | 0.99 | 0.02   | 0.84    | 0.94 |
| Faecalibacterium              | 0.16   | 0.11    | 0.31 | 0.09   | 0.34    | 0.69 | 0.04   | 0.66    | 0.92 | 0.06   | 0.57    | 0.96 | 0.06   | 0.54    | 0.92 |
| Family_XIII_AD3011_group      | 0.18   | 0.09    | 0.26 | 0.14   | 0.14    | 0.46 | 0.10   | 0.33    | 0.74 | 0.09   | 0.41    | 0.83 | 0.07   | 0.50    | 0.92 |
| Family_XIII_UCG.001           | 0.24   | 0.07    | 0.23 | 0.20   | 0.10    | 0.42 | 0.17   | 0.21    | 0.74 | 0.14   | 0.27    | 0.83 | 0.13   | 0.34    | 0.87 |
| Flavonifractor                | -0.10  | 0.37    | 0.63 | -0.11  | 0.32    | 0.69 | -0.08  | 0.48    | 0.86 | -0.08  | 0.47    | 0.89 | -0.07  | 0.53    | 0.92 |
| Frisingicoccus                | 0.15   | 0.09    | 0.26 | 0.09   | 0.28    | 0.69 | 0.04   | 0.63    | 0.91 | 0.02   | 0.81    | 0.99 | 0.03   | 0.71    | 0.94 |
| Fusicatenibacter              | 0.04   | 0.64    | 0.84 | 0.00   | 0.98    | 0.99 | -0.02  | 0.80    | 1.00 | 0.00   | 0.99    | 1.00 | -0.02  | 0.84    | 0.94 |
| Fusobacterium                 | -0.16  | 0.25    | 0.55 | -0.12  | 0.35    | 0.69 | -0.03  | 0.84    | 1.00 | -0.05  | 0.74    | 0.99 | -0.05  | 0.71    | 0.94 |
| GCA.900066575                 | 0.17   | 0.16    | 0.40 | 0.09   | 0.43    | 0.76 | 0.02   | 0.88    | 1.00 | -0.01  | 0.96    | 0.99 | 0.00   | 0.97    | 0.99 |
| GCA.900066755                 | 0.06   | 0.76    | 0.88 | 0.08   | 0.66    | 0.86 | 0.10   | 0.60    | 0.91 | 0.05   | 0.77    | 0.99 | 0.10   | 0.58    | 0.94 |
| Gordonibacter                 | 0.24   | 0.03    | 0.14 | 0.21   | 0.05    | 0.29 | 0.14   | 0.20    | 0.74 | 0.12   | 0.31    | 0.83 | 0.11   | 0.33    | 0.87 |
| Granulicatella                | 0.01   | 0.94    | 0.96 | 0.00   | 0.99    | 0.99 | 0.00   | 0.99    | 1.00 | 0.02   | 0.90    | 0.99 | 0.06   | 0.71    | 0.94 |
| Haemophilus                   | 0.06   | 0.50    | 0.74 | 0.01   | 0.91    | 0.95 | -0.05  | 0.60    | 0.91 | -0.05  | 0.59    | 0.96 | -0.03  | 0.77    | 0.94 |
| Harryflintia                  | 0.13   | 0.32    | 0.62 | 0.13   | 0.28    | 0.69 | 0.16   | 0.23    | 0.74 | 0.13   | 0.31    | 0.83 | 0.14   | 0.30    | 0.87 |
| Holdemania                    | 0.40   | 0.04    | 0.17 | 0.37   | 0.05    | 0.29 | 0.35   | 0.08    | 0.58 | 0.33   | 0.09    | 0.74 | 0.30   | 0.12    | 0.80 |



|                               |       |      |      |       |      |      |       |      |      |       |      |      |       |      |      |
|-------------------------------|-------|------|------|-------|------|------|-------|------|------|-------|------|------|-------|------|------|
| Hungatella                    | -0.08 | 0.43 | 0.71 | -0.05 | 0.62 | 0.84 | 0.03  | 0.78 | 1.00 | 0.03  | 0.79 | 0.99 | 0.04  | 0.71 | 0.94 |
| Hydrogenoanaerobacterium      | 0.24  | 0.03 | 0.13 | 0.16  | 0.12 | 0.44 | 0.15  | 0.18 | 0.74 | 0.12  | 0.29 | 0.83 | 0.12  | 0.28 | 0.87 |
| Incertae_Sedis                | 0.17  | 0.33 | 0.62 | 0.17  | 0.31 | 0.69 | 0.19  | 0.28 | 0.74 | 0.17  | 0.31 | 0.83 | 0.18  | 0.29 | 0.87 |
| Intestinibacter               | 0.00  | 1.00 | 1.00 | 0.03  | 0.74 | 0.93 | 0.02  | 0.86 | 1.00 | 0.04  | 0.70 | 0.99 | 0.07  | 0.53 | 0.92 |
| Intestinimonas                | 0.29  | 0.00 | 0.04 | 0.25  | 0.00 | 0.12 | 0.24  | 0.01 | 0.36 | 0.21  | 0.02 | 0.59 | 0.24  | 0.01 | 0.39 |
| Lachnoclostridium             | -0.50 | 0.01 | 0.09 | -0.34 | 0.08 | 0.35 | -0.21 | 0.31 | 0.74 | -0.19 | 0.36 | 0.83 | -0.19 | 0.35 | 0.87 |
| Lachnospira                   | 0.24  | 0.01 | 0.09 | 0.15  | 0.12 | 0.44 | 0.10  | 0.32 | 0.74 | 0.11  | 0.25 | 0.83 | 0.13  | 0.18 | 0.80 |
| Lachnospiraceae_FCS020_group  | 0.39  | 0.00 | 0.03 | 0.29  | 0.01 | 0.12 | 0.24  | 0.03 | 0.55 | 0.24  | 0.03 | 0.59 | 0.22  | 0.04 | 0.65 |
| Lachnospiraceae_ND3007_group  | 0.01  | 0.88 | 0.94 | -0.03 | 0.62 | 0.84 | -0.07 | 0.31 | 0.74 | -0.06 | 0.42 | 0.83 | -0.05 | 0.48 | 0.92 |
| Lachnospiraceae_NK4A136_group | 0.01  | 0.89 | 0.94 | -0.07 | 0.48 | 0.76 | -0.18 | 0.09 | 0.58 | -0.17 | 0.12 | 0.74 | -0.16 | 0.14 | 0.80 |
| Lachnospiraceae_UCG.001       | 0.09  | 0.25 | 0.55 | 0.07  | 0.37 | 0.69 | 0.03  | 0.67 | 0.92 | 0.02  | 0.80 | 0.99 | 0.03  | 0.66 | 0.94 |
| Lachnospiraceae_UCG.004       | 0.04  | 0.61 | 0.81 | 0.02  | 0.74 | 0.93 | 0.00  | 0.97 | 1.00 | 0.01  | 0.94 | 0.99 | -0.01 | 0.91 | 0.96 |
| Lachnospiraceae_UCG.010       | -0.03 | 0.77 | 0.88 | -0.10 | 0.37 | 0.69 | -0.13 | 0.26 | 0.74 | -0.14 | 0.23 | 0.83 | -0.13 | 0.27 | 0.87 |
| Lactobacillus                 | -0.17 | 0.07 | 0.23 | -0.09 | 0.30 | 0.69 | -0.09 | 0.33 | 0.74 | -0.06 | 0.51 | 0.93 | -0.06 | 0.55 | 0.92 |
| Lactococcus                   | 0.09  | 0.49 | 0.74 | 0.09  | 0.49 | 0.76 | 0.08  | 0.54 | 0.89 | 0.07  | 0.58 | 0.96 | 0.07  | 0.62 | 0.94 |
| Marvinbryantia                | -0.06 | 0.46 | 0.73 | -0.08 | 0.29 | 0.69 | -0.07 | 0.35 | 0.74 | -0.07 | 0.35 | 0.83 | -0.05 | 0.53 | 0.92 |
| Megasphaera                   | -0.07 | 0.35 | 0.63 | -0.01 | 0.87 | 0.95 | 0.06  | 0.46 | 0.85 | 0.06  | 0.42 | 0.83 | 0.05  | 0.50 | 0.92 |
| Monoglobus                    | 0.33  | 0.00 | 0.04 | 0.30  | 0.00 | 0.12 | 0.28  | 0.01 | 0.36 | 0.28  | 0.01 | 0.42 | 0.30  | 0.01 | 0.27 |
| Moryella                      | 0.18  | 0.20 | 0.46 | 0.10  | 0.46 | 0.76 | 0.06  | 0.69 | 0.93 | 0.07  | 0.60 | 0.96 | 0.09  | 0.53 | 0.92 |
| Negativibacillus              | 0.04  | 0.64 | 0.84 | 0.08  | 0.30 | 0.69 | 0.11  | 0.18 | 0.74 | 0.10  | 0.20 | 0.83 | 0.11  | 0.19 | 0.80 |
| NK4A214_group                 | 0.12  | 0.06 | 0.22 | 0.10  | 0.10 | 0.43 | 0.08  | 0.21 | 0.74 | 0.07  | 0.26 | 0.83 | 0.09  | 0.17 | 0.80 |
| Odoribacter                   | 0.12  | 0.06 | 0.22 | 0.09  | 0.14 | 0.46 | 0.07  | 0.29 | 0.74 | 0.06  | 0.30 | 0.83 | 0.06  | 0.37 | 0.87 |
| Oscillibacter                 | 0.25  | 0.02 | 0.12 | 0.21  | 0.04 | 0.29 | 0.20  | 0.06 | 0.58 | 0.18  | 0.10 | 0.74 | 0.17  | 0.11 | 0.80 |
| Oscillospira                  | 0.06  | 0.68 | 0.84 | 0.09  | 0.54 | 0.80 | 0.11  | 0.45 | 0.84 | 0.11  | 0.47 | 0.89 | 0.15  | 0.31 | 0.87 |
| Oxalobacter                   | 0.17  | 0.11 | 0.31 | 0.06  | 0.58 | 0.84 | 0.00  | 0.98 | 1.00 | -0.01 | 0.95 | 0.99 | -0.03 | 0.81 | 0.94 |
| Paludicola                    | 0.20  | 0.09 | 0.26 | 0.15  | 0.16 | 0.50 | 0.07  | 0.52 | 0.86 | 0.04  | 0.72 | 0.99 | 0.06  | 0.63 | 0.94 |
| Parabacteroides               | 0.04  | 0.65 | 0.84 | 0.07  | 0.35 | 0.69 | 0.09  | 0.25 | 0.74 | 0.12  | 0.14 | 0.83 | 0.14  | 0.09 | 0.80 |
| Paraprevotella                | -0.06 | 0.37 | 0.63 | -0.04 | 0.46 | 0.76 | -0.06 | 0.37 | 0.74 | -0.06 | 0.34 | 0.83 | -0.05 | 0.42 | 0.91 |
| Parasutterella                | 0.14  | 0.02 | 0.11 | 0.12  | 0.03 | 0.29 | 0.10  | 0.09 | 0.58 | 0.11  | 0.08 | 0.74 | 0.09  | 0.15 | 0.80 |
| Peptococcus                   | 0.30  | 0.02 | 0.11 | 0.24  | 0.05 | 0.29 | 0.19  | 0.14 | 0.74 | 0.18  | 0.16 | 0.83 | 0.21  | 0.11 | 0.80 |
| Phascolarctobacterium         | 0.09  | 0.13 | 0.35 | 0.10  | 0.06 | 0.33 | 0.10  | 0.07 | 0.58 | 0.10  | 0.09 | 0.74 | 0.08  | 0.15 | 0.80 |
| Phocea                        | -0.09 | 0.52 | 0.74 | -0.10 | 0.44 | 0.76 | -0.10 | 0.47 | 0.85 | -0.09 | 0.55 | 0.96 | -0.06 | 0.69 | 0.94 |
| Prevotella                    | -0.10 | 0.08 | 0.26 | -0.05 | 0.34 | 0.69 | -0.05 | 0.35 | 0.74 | -0.05 | 0.40 | 0.83 | -0.05 | 0.37 | 0.87 |
| Romboutsia                    | 0.01  | 0.94 | 0.96 | 0.02  | 0.81 | 0.95 | 0.01  | 0.89 | 1.00 | 0.03  | 0.78 | 0.99 | 0.04  | 0.72 | 0.94 |
| Roseburia                     | -0.03 | 0.75 | 0.88 | -0.03 | 0.79 | 0.95 | -0.04 | 0.71 | 0.94 | -0.02 | 0.83 | 0.99 | 0.00  | 1.00 | 1.00 |
| Ruminococcus                  | 0.16  | 0.02 | 0.11 | 0.10  | 0.12 | 0.44 | 0.09  | 0.23 | 0.74 | 0.08  | 0.25 | 0.83 | 0.09  | 0.23 | 0.87 |
| Sellimonas                    | 0.21  | 0.04 | 0.16 | 0.14  | 0.17 | 0.51 | 0.11  | 0.30 | 0.74 | 0.08  | 0.42 | 0.83 | 0.10  | 0.36 | 0.87 |
| Shuttleworthia                | 0.23  | 0.02 | 0.10 | 0.11  | 0.23 | 0.68 | 0.07  | 0.50 | 0.86 | 0.05  | 0.63 | 0.97 | 0.07  | 0.47 | 0.92 |
| Slackia                       | -0.06 | 0.51 | 0.74 | -0.05 | 0.56 | 0.83 | -0.04 | 0.66 | 0.92 | -0.02 | 0.80 | 0.99 | -0.05 | 0.60 | 0.94 |
| Streptococcus                 | 0.05  | 0.68 | 0.84 | 0.06  | 0.63 | 0.84 | 0.09  | 0.45 | 0.84 | 0.10  | 0.40 | 0.83 | 0.13  | 0.32 | 0.87 |
| Subdoligranulum               | 0.27  | 0.00 | 0.04 | 0.23  | 0.01 | 0.12 | 0.18  | 0.05 | 0.58 | 0.19  | 0.04 | 0.59 | 0.20  | 0.03 | 0.59 |
| Sutterella                    | -0.14 | 0.01 | 0.09 | -0.09 | 0.08 | 0.37 | -0.11 | 0.05 | 0.58 | -0.10 | 0.06 | 0.67 | -0.10 | 0.06 | 0.80 |
| TM7x                          | 0.00  | 0.98 | 0.99 | -0.06 | 0.61 | 0.84 | -0.07 | 0.56 | 0.90 | -0.07 | 0.58 | 0.96 | -0.03 | 0.81 | 0.94 |
| Turicibacter                  | 0.10  | 0.48 | 0.74 | 0.12  | 0.37 | 0.69 | 0.16  | 0.24 | 0.74 | 0.16  | 0.26 | 0.83 | 0.12  | 0.39 | 0.88 |
| Tuzzerella                    | -0.02 | 0.84 | 0.91 | 0.02  | 0.83 | 0.95 | 0.00  | 0.96 | 1.00 | -0.02 | 0.84 | 0.99 | -0.03 | 0.73 | 0.94 |
| UBA1819                       | 0.27  | 0.04 | 0.16 | 0.27  | 0.03 | 0.29 | 0.31  | 0.02 | 0.44 | 0.28  | 0.04 | 0.59 | 0.30  | 0.03 | 0.59 |
| UCG.002                       | 0.15  | 0.02 | 0.10 | 0.11  | 0.05 | 0.29 | 0.07  | 0.29 | 0.74 | 0.06  | 0.35 | 0.83 | 0.07  | 0.29 | 0.87 |
| UCG.003                       | 0.07  | 0.32 | 0.62 | 0.04  | 0.61 | 0.84 | 0.00  | 0.96 | 1.00 | 0.00  | 1.00 | 1.00 | -0.01 | 0.88 | 0.95 |
| UCG.005                       | 0.20  | 0.01 | 0.09 | 0.15  | 0.05 | 0.29 | 0.09  | 0.28 | 0.74 | 0.08  | 0.35 | 0.83 | 0.07  | 0.37 | 0.87 |
| UCG.009                       | 0.12  | 0.36 | 0.63 | 0.00  | 0.99 | 0.99 | -0.03 | 0.84 | 1.00 | -0.04 | 0.78 | 0.99 | -0.02 | 0.86 | 0.94 |
| Veillonella                   | -0.05 | 0.57 | 0.79 | -0.07 | 0.41 | 0.74 | -0.10 | 0.31 | 0.74 | -0.08 | 0.39 | 0.83 | -0.07 | 0.49 | 0.92 |

Multivariable-adjusted regression models adjusted for:

Model 1: sequencing batch, age, race, gender, study center

Model 2: Model 1, with education

Model 3: Model 2, with physical activity, diet score, medication use, and smoking

Model 4: Model 3 with BMI

Model 5: Model 4 with hypertension and diabetes

eTable 61: Descriptive statistics for phyla

| <b>Phylum</b>            | <b>Min.</b> | <b>25th %</b> | <b>Median</b> | <b>75th %</b> | <b>Max.</b> | <b>Mean</b> | <b>SD</b> | <b>Missing, n</b> |
|--------------------------|-------------|---------------|---------------|---------------|-------------|-------------|-----------|-------------------|
| <b>Actinobacteriota</b>  | 51          | 1284          | 2401          | 4384          | 35951       | 3643        | 4202.29   | 0                 |
| <b>Bacteroidota</b>      | 75          | 42818         | 54298         | 69215         | 135415      | 56826       | 20544.51  | 0                 |
| <b>Cyanobacteria</b>     | 0           | 0             | 0             | 33            | 5629        | 147.1       | 473.16    | 380               |
| <b>Desulfobacterota</b>  | 0           | 54.5          | 282           | 611           | 3605        | 446.8       | 544.63    | 95                |
| <b>Firmicutes</b>        | 12890       | 39809         | 51938         | 64752         | 132185      | 54006       | 18641.44  | 0                 |
| <b>Fusobacteriota</b>    | 0           | 0             | 0             | 9             | 12808       | 241.1       | 1035.03   | 396               |
| <b>Patescibacteria</b>   | 0           | 3             | 10            | 26            | 1826        | 25.34       | 83.04     | 115               |
| <b>Proteobacteria</b>    | 0           | 1689          | 3038          | 5296          | 26977       | 4167        | 4000.37   | 1                 |
| <b>Verrucomicrobiota</b> | 0           | 3             | 148           | 1230          | 23786       | 1242        | 2639.92   | 135               |

ETable 62: Multivariable-adjusted regression coefficients, p-values, and false discovery rate (FDR)-adjusted p-values for phyla with respect to DSST.

| e                 | Model1 |         |      | Model2 |         |      | Model3 |         |      | Model4 |         |      | Model5 |         |      |
|-------------------|--------|---------|------|--------|---------|------|--------|---------|------|--------|---------|------|--------|---------|------|
|                   | beta   | p-value | FDR  | beta   | p-value | FDR  | beta   | p-value | FDR  | beta   | p-value | FDR  | beta   | p-value | FDR  |
| Actinobacteriota  | -2.02  | 0.15    | 0.41 | -0.35  | 0.80    | 0.94 | -0.35  | 0.80    | 0.94 | -0.35  | 0.80    | 0.95 | -0.19  | 0.90    | 0.97 |
| Bacteroidota      | -1.56  | 0.66    | 0.74 | -1.37  | 0.68    | 0.94 | -0.24  | 0.94    | 0.94 | -0.23  | 0.95    | 0.95 | -0.27  | 0.94    | 0.97 |
| Cyanobacteria     | 0.74   | 0.20    | 0.41 | 0.20   | 0.73    | 0.94 | -0.06  | 0.92    | 0.94 | -0.06  | 0.92    | 0.95 | -0.02  | 0.97    | 0.97 |
| Desulfobacterota  | 0.11   | 0.86    | 0.86 | -0.03  | 0.95    | 0.95 | -0.39  | 0.52    | 0.94 | -0.39  | 0.52    | 0.95 | -0.40  | 0.51    | 0.97 |
| Firmicutes        | 18.61  | 0.00    | 0.00 | 13.94  | 0.01    | 0.04 | 10.91  | 0.05    | 0.22 | 10.91  | 0.05    | 0.23 | 11.21  | 0.05    | 0.21 |
| Fusobacteriota    | -1.15  | 0.23    | 0.41 | -0.62  | 0.49    | 0.94 | 0.15   | 0.88    | 0.94 | 0.14   | 0.88    | 0.95 | 0.07   | 0.94    | 0.97 |
| Patescibacteria   | -0.61  | 0.54    | 0.71 | -1.11  | 0.24    | 0.72 | -1.03  | 0.29    | 0.87 | -1.03  | 0.29    | 0.87 | -0.81  | 0.41    | 0.97 |
| Proteobacteria    | -0.67  | 0.55    | 0.71 | -0.22  | 0.83    | 0.94 | 0.19   | 0.86    | 0.94 | 0.19   | 0.86    | 0.95 | 0.04   | 0.97    | 0.97 |
| Verrucomicrobiota | 1.65   | 0.00    | 0.00 | 1.37   | 0.00    | 0.02 | 1.30   | 0.00    | 0.04 | 1.30   | 0.01    | 0.05 | 1.34   | 0.00    | 0.04 |

Multivariable-adjusted regression models adjusted for:

Model 1: sequencing batch, age, race, gender, study center

Model 2: Model 1, with education

Model 3: Model 2, with physical activity, diet score, medication use, and smoking

Model 4: Model 3 with BMI

Model 5: Model 4 with hypertension and diabetes

eTable 63: Multivariable-adjusted regression coefficients, p-values, and false discovery rate (FDR)-adjusted p-values for phyla with respect to Stroop.

|                   | Model1 |         |      | Model2 |         |      | Model3 |         |      | Model4 |         |      | Model5 |         |      |
|-------------------|--------|---------|------|--------|---------|------|--------|---------|------|--------|---------|------|--------|---------|------|
|                   | beta   | p-value | FDR  | beta   | p-value | FDR  | beta   | p-value | FDR  | beta   | p-value | FDR  | beta   | p-value | FDR  |
| Actinobacteriota  | -0.72  | 0.49    | 0.55 | -1.32  | 0.21    | 0.37 | -1.57  | 0.13    | 0.30 | -1.59  | 0.13    | 0.29 | -1.57  | 0.14    | 0.31 |
| Bacteroidota      | 2.12   | 0.41    | 0.52 | 2.06   | 0.41    | 0.53 | 1.56   | 0.53    | 0.68 | 1.54   | 0.54    | 0.69 | 1.32   | 0.60    | 0.77 |
| Cyanobacteriota   | -0.39  | 0.36    | 0.52 | -0.22  | 0.61    | 0.69 | -0.06  | 0.89    | 0.89 | -0.04  | 0.92    | 0.92 | -0.09  | 0.83    | 0.83 |
| Fusobacteriota    | -0.54  | 0.22    | 0.43 | -0.48  | 0.26    | 0.39 | -0.34  | 0.45    | 0.67 | -0.33  | 0.45    | 0.68 | -0.38  | 0.40    | 0.60 |
| Firmicutes        | -10.80 | 0.01    | 0.07 | -9.26  | 0.02    | 0.19 | -7.95  | 0.05    | 0.30 | -7.92  | 0.06    | 0.29 | -7.61  | 0.07    | 0.31 |
| Fusobacteriota    | 1.56   | 0.02    | 0.11 | 1.38   | 0.04    | 0.20 | 1.17   | 0.09    | 0.30 | 1.19   | 0.09    | 0.29 | 1.14   | 0.10    | 0.31 |
| Patensibacteriota | -0.28  | 0.70    | 0.70 | -0.13  | 0.86    | 0.86 | -0.29  | 0.68    | 0.77 | -0.29  | 0.69    | 0.78 | -0.28  | 0.70    | 0.79 |
| Proteobacteriota  | -0.98  | 0.24    | 0.43 | -1.13  | 0.17    | 0.37 | -1.24  | 0.13    | 0.30 | -1.27  | 0.12    | 0.29 | -1.26  | 0.13    | 0.31 |
| Verrucomicrobiota | -0.68  | 0.04    | 0.12 | -0.59  | 0.08    | 0.23 | -0.41  | 0.23    | 0.42 | -0.41  | 0.24    | 0.42 | -0.41  | 0.24    | 0.44 |

Multivariable-adjusted regression models adjusted for:

Model 1: sequencing batch, age, race, gender, study center

Model 2: Model 1, with education

Model 3: Model 2, with physical activity, diet score, medication use, and smoking

Model 4: Model 3 with BMI

Model 5: Model 4 with hypertension and diabetes

eTable 64: Multivariable-adjusted regression coefficients, p-values, and false discovery rate (FDR)-adjusted p-values for phyla with respect to RAVLT

|                   | Model1 |         |      | Model2 |         |      | Model3 |         |      | Model4 |         |      | Model5 |         |      |
|-------------------|--------|---------|------|--------|---------|------|--------|---------|------|--------|---------|------|--------|---------|------|
|                   | beta   | p-value | FDR  | beta   | p-value | FDR  | beta   | p-value | FDR  | beta   | p-value | FDR  | beta   | p-value | FDR  |
| Actinobacteriota  | -0.29  | 0.07    | 0.24 | -0.11  | 0.48    | 0.70 | -0.08  | 0.62    | 0.84 | -0.08  | 0.63    | 0.84 | -0.07  | 0.66    | 0.86 |
| Bacteroidota      | -0.21  | 0.60    | 0.67 | -0.19  | 0.62    | 0.70 | -0.01  | 0.97    | 0.97 | -0.01  | 0.98    | 0.98 | 0.00   | 0.99    | 0.99 |
| Cyanobacteria     | 0.11   | 0.11    | 0.24 | 0.05   | 0.47    | 0.70 | 0.03   | 0.65    | 0.84 | 0.03   | 0.69    | 0.84 | 0.04   | 0.61    | 0.86 |
| Desulfobacterota  | 0.04   | 0.55    | 0.67 | 0.03   | 0.70    | 0.70 | 0.02   | 0.74    | 0.84 | 0.02   | 0.75    | 0.84 | 0.02   | 0.77    | 0.86 |
| Firmicutes        | 1.95   | 0.00    | 0.02 | 1.43   | 0.02    | 0.17 | 1.19   | 0.07    | 0.48 | 1.18   | 0.07    | 0.47 | 1.20   | 0.07    | 0.57 |
| Fusobacteriota    | -0.19  | 0.08    | 0.24 | -0.13  | 0.21    | 0.63 | -0.04  | 0.73    | 0.84 | -0.04  | 0.71    | 0.84 | -0.04  | 0.71    | 0.86 |
| Patescibacteria   | -0.08  | 0.46    | 0.67 | -0.14  | 0.20    | 0.63 | -0.18  | 0.11    | 0.48 | -0.18  | 0.10    | 0.47 | -0.18  | 0.13    | 0.57 |
| Proteobacteria    | 0.00   | 0.99    | 0.99 | 0.05   | 0.70    | 0.70 | 0.05   | 0.69    | 0.84 | 0.06   | 0.67    | 0.84 | 0.05   | 0.73    | 0.86 |
| Verrucomicrobiota | 0.07   | 0.17    | 0.30 | 0.04   | 0.42    | 0.70 | 0.02   | 0.67    | 0.84 | 0.02   | 0.68    | 0.84 | 0.02   | 0.68    | 0.86 |

Multivariable-adjusted regression models adjusted for:

Model 1: sequencing batch, age, race, gender, study center

Model 2: Model 1, with education

Model 3: Model 2, with physical activity, diet score, medication use, and smoking

Model 4: Model 3 with BMI

Model 5: Model 4 with hypertension and diabetes

eTable 65: Multivariable-adjusted regression coefficients, p-values, and false discovery rate (FDR)-adjusted p-values for phyla with respect to category fluency.

|                   | Model1 |         |      | Model2 |         |      | Model3 |         |      | Model4 |         |      | Model5 |         |      |
|-------------------|--------|---------|------|--------|---------|------|--------|---------|------|--------|---------|------|--------|---------|------|
|                   | beta   | p-value | FDR  | beta   | p-value | FDR  | beta   | p-value | FDR  | beta   | p-value | FDR  | beta   | p-value | FDR  |
| Actinobacteriota  | -0.07  | 0.89    | 0.89 | 0.39   | 0.39    | 0.61 | 0.51   | 0.29    | 0.61 | 0.53   | 0.27    | 0.57 | 0.53   | 0.27    | 0.60 |
| Bacteroidota      | 0.88   | 0.45    | 0.67 | 0.93   | 0.40    | 0.61 | 0.96   | 0.40    | 0.61 | 1.01   | 0.38    | 0.57 | 1.10   | 0.34    | 0.60 |
| Cyanobacteria     | 0.49   | 0.01    | 0.09 | 0.35   | 0.06    | 0.18 | 0.38   | 0.06    | 0.18 | 0.35   | 0.08    | 0.24 | 0.36   | 0.08    | 0.23 |
| Desulfobacterota  | 0.46   | 0.02    | 0.09 | 0.42   | 0.03    | 0.12 | 0.42   | 0.04    | 0.18 | 0.42   | 0.04    | 0.19 | 0.40   | 0.05    | 0.23 |
| Firmicutes        | 2.18   | 0.23    | 0.51 | 0.90   | 0.61    | 0.72 | 0.84   | 0.66    | 0.74 | 0.79   | 0.68    | 0.76 | 0.73   | 0.70    | 0.79 |
| Fusobacteriota    | -0.28  | 0.36    | 0.66 | -0.14  | 0.64    | 0.72 | 0.01   | 0.97    | 0.97 | -0.02  | 0.96    | 0.96 | 0.00   | 1.00    | 1.00 |
| Patescibacteria   | -0.18  | 0.58    | 0.74 | -0.32  | 0.32    | 0.61 | -0.28  | 0.40    | 0.61 | -0.29  | 0.38    | 0.57 | -0.28  | 0.40    | 0.60 |
| Proteobacteria    | 0.76   | 0.04    | 0.12 | 0.88   | 0.01    | 0.12 | 1.05   | 0.01    | 0.05 | 1.09   | 0.00    | 0.03 | 1.08   | 0.00    | 0.04 |
| Verrucomicrobiota | 0.03   | 0.84    | 0.89 | -0.05  | 0.74    | 0.74 | -0.07  | 0.65    | 0.74 | -0.08  | 0.63    | 0.76 | -0.10  | 0.53    | 0.69 |

Multivariable-adjusted regression models adjusted for:

Model 1: sequencing batch, age, race, gender, study center

Model 2: Model 1, with education

Model 3: Model 2, with physical activity, diet score, medication use, and smoking

Model 4: Model 3 with BMI

Model 5: Model 4 with hypertension and diabetes

eTable 66: Multivariable-adjusted regression coefficients, p-values, and false discovery rate (FDR)-adjusted p-values for phyla with respect to letter fluency.

|                   | Model1 |         |      | Model2 |         |      | Model3 |         |      | Model4 |         |      | Model5 |         |      |
|-------------------|--------|---------|------|--------|---------|------|--------|---------|------|--------|---------|------|--------|---------|------|
|                   | beta   | p-value | FDR  | beta   | p-value | FDR  | beta   | p-value | FDR  | beta   | p-value | FDR  | beta   | p-value | FDR  |
| Actinobacteriota  | -1.37  | 0.23    | 0.66 | -0.32  | 0.78    | 0.98 | -0.25  | 0.83    | 0.91 | -0.22  | 0.85    | 0.92 | -0.18  | 0.88    | 0.88 |
| Bacteroidota      | 2.11   | 0.45    | 0.66 | 2.17   | 0.43    | 0.77 | 1.50   | 0.59    | 0.91 | 1.57   | 0.57    | 0.91 | 1.59   | 0.57    | 0.88 |
| Cyanobacteria     | 1.00   | 0.03    | 0.31 | 0.67   | 0.15    | 0.45 | 0.34   | 0.49    | 0.91 | 0.30   | 0.54    | 0.91 | 0.35   | 0.49    | 0.88 |
| Desulfobacterota  | 0.85   | 0.08    | 0.35 | 0.76   | 0.11    | 0.45 | 0.74   | 0.13    | 0.87 | 0.74   | 0.14    | 0.91 | 0.67   | 0.18    | 0.88 |
| Firmicutes        | 2.97   | 0.51    | 0.66 | 0.10   | 0.98    | 0.98 | 0.50   | 0.91    | 0.91 | 0.44   | 0.92    | 0.92 | 0.79   | 0.87    | 0.88 |
| Fusobacteriota    | 0.51   | 0.51    | 0.66 | 0.79   | 0.29    | 0.66 | 1.02   | 0.19    | 0.87 | 1.00   | 0.21    | 0.91 | 1.00   | 0.21    | 0.88 |
| Patescibacteria   | -0.83  | 0.30    | 0.66 | -1.15  | 0.14    | 0.45 | -0.71  | 0.38    | 0.91 | -0.73  | 0.37    | 0.91 | -0.71  | 0.38    | 0.88 |
| Proteobacteria    | -0.26  | 0.78    | 0.87 | 0.07   | 0.94    | 0.98 | 0.29   | 0.75    | 0.91 | 0.34   | 0.71    | 0.91 | 0.27   | 0.77    | 0.88 |
| Verrucomicrobiota | 0.06   | 0.87    | 0.87 | -0.12  | 0.74    | 0.98 | -0.15  | 0.69    | 0.91 | -0.16  | 0.67    | 0.91 | -0.21  | 0.59    | 0.88 |

Multivariable-adjusted regression models adjusted for:

Model 1: sequencing batch, age, race, gender, study center

Model 2: Model 1, with education

Model 3: Model 2, with physical activity, diet score, medication use, and smoking

Model 4: Model 3 with BMI

Model 5: Model 4 with hypertension and diabetes



eTable 67: Multivariable-adjusted regression coefficients, p-values, and false discovery rate (FDR)-adjusted p-values for phyla with respect to MOCA.

|                   | Model1 |         |      | Model2 |         |      | Model3 |         |      | Model4 |         |      | Model5 |         |      |
|-------------------|--------|---------|------|--------|---------|------|--------|---------|------|--------|---------|------|--------|---------|------|
|                   | beta   | p-value | FDR  | beta   | p-value | FDR  | beta   | p-value | FDR  | beta   | p-value | FDR  | beta   | p-value | FDR  |
| Actinobacteriota  | -0.50  | 0.10    | 0.27 | -0.08  | 0.78    | 1.00 | 0.00   | 1.00    | 1.00 | 0.00   | 0.99    | 0.99 | -0.01  | 0.96    | 0.96 |
| Bacteroidota      | 0.16   | 0.84    | 0.97 | 0.21   | 0.77    | 1.00 | 0.34   | 0.64    | 0.97 | 0.34   | 0.63    | 0.99 | 0.34   | 0.63    | 0.96 |
| Cyanobacteria     | 0.19   | 0.13    | 0.27 | 0.06   | 0.63    | 1.00 | 0.04   | 0.76    | 0.97 | 0.03   | 0.78    | 0.99 | 0.03   | 0.82    | 0.96 |
| Desulfobacterota  | 0.02   | 0.89    | 0.97 | -0.02  | 0.89    | 1.00 | -0.04  | 0.75    | 0.97 | -0.04  | 0.75    | 0.99 | -0.04  | 0.73    | 0.96 |
| Firmicutes        | 2.35   | 0.05    | 0.27 | 1.13   | 0.32    | 1.00 | 1.16   | 0.32    | 0.97 | 1.16   | 0.32    | 0.99 | 1.25   | 0.29    | 0.96 |
| Fusobacteriota    | -0.37  | 0.07    | 0.27 | -0.24  | 0.22    | 1.00 | -0.18  | 0.36    | 0.97 | -0.18  | 0.35    | 0.99 | -0.19  | 0.34    | 0.96 |
| Patescibacteria   | 0.01   | 0.97    | 0.97 | -0.12  | 0.56    | 1.00 | -0.10  | 0.63    | 0.97 | -0.10  | 0.62    | 0.99 | -0.08  | 0.69    | 0.96 |
| Proteobacteria    | -0.11  | 0.65    | 0.97 | 0.00   | 1.00    | 1.00 | -0.02  | 0.93    | 1.00 | -0.01  | 0.95    | 0.99 | -0.04  | 0.87    | 0.96 |
| Verrucomicrobiota | 0.14   | 0.15    | 0.27 | 0.07   | 0.46    | 1.00 | 0.08   | 0.41    | 0.97 | 0.08   | 0.41    | 0.99 | 0.07   | 0.50    | 0.96 |

Multivariable-adjusted regression models adjusted for:

Model 1: sequencing batch, age, race, gender, study center

Model 2: Model 1, with education

Model 3: Model 2, with physical activity, diet score, medication use, and smoking

Model 4: Model 3 with BMI

Model 5: Model 4 with hypertension and diabetes

eTable 68: Multivariable-adjusted regression coefficients, p-values, and false discovery rate (FDR)-adjusted p-values for phyla with respect to PC (1st).

|                   | Model1 |         |      | Model2 |         |      | Model3 |         |      | Model4 |         |      | Model5 |         |      |
|-------------------|--------|---------|------|--------|---------|------|--------|---------|------|--------|---------|------|--------|---------|------|
|                   | beta   | p-value | FDR  | beta   | p-value | FDR  | beta   | p-value | FDR  | beta   | p-value | FDR  | beta   | p-value | FDR  |
| Actinobacteriota  | -0.25  | 0.09    | 0.19 | -0.04  | 0.79    | 0.89 | 0.00   | 0.99    | 0.99 | 0.00   | 0.98    | 0.98 | 0.01   | 0.96    | 0.96 |
| Bacteroidota      | 0.02   | 0.97    | 0.97 | 0.04   | 0.90    | 0.90 | 0.12   | 0.73    | 0.93 | 0.13   | 0.70    | 0.90 | 0.14   | 0.67    | 0.86 |
| Cyanobacteria     | 0.14   | 0.02    | 0.08 | 0.07   | 0.20    | 0.46 | 0.05   | 0.44    | 0.71 | 0.04   | 0.50    | 0.75 | 0.05   | 0.44    | 0.79 |
| Desulfobacterota  | 0.08   | 0.20    | 0.30 | 0.06   | 0.29    | 0.50 | 0.04   | 0.47    | 0.71 | 0.04   | 0.48    | 0.75 | 0.04   | 0.53    | 0.80 |
| Firmicutes        | 1.60   | 0.00    | 0.04 | 1.00   | 0.06    | 0.46 | 0.81   | 0.14    | 0.66 | 0.80   | 0.15    | 0.59 | 0.82   | 0.14    | 0.72 |
| Fusobacteriota    | -0.15  | 0.11    | 0.20 | -0.09  | 0.33    | 0.50 | -0.01  | 0.89    | 0.99 | -0.02  | 0.85    | 0.95 | -0.02  | 0.85    | 0.96 |
| Patescibacteria   | -0.07  | 0.51    | 0.65 | -0.13  | 0.16    | 0.46 | -0.12  | 0.22    | 0.66 | -0.12  | 0.21    | 0.59 | -0.11  | 0.25    | 0.72 |
| Proteobacteria    | 0.03   | 0.79    | 0.88 | 0.09   | 0.41    | 0.52 | 0.11   | 0.29    | 0.66 | 0.12   | 0.26    | 0.59 | 0.11   | 0.32    | 0.72 |
| Verrucomicrobiota | 0.10   | 0.03    | 0.08 | 0.07   | 0.12    | 0.46 | 0.06   | 0.21    | 0.66 | 0.06   | 0.22    | 0.59 | 0.05   | 0.25    | 0.72 |

Multivariable-adjusted regression models adjusted for:

Model 1: sequencing batch, age, race, gender, study center

Model 2: Model 1, with education

Model 3: Model 2, with physical activity, diet score, medication use, and smoking

Model 4: Model 3 with BMI

Model 5: Model 4 with hypertension and diabetes

eTable 69: Coefficients and p-values for associations between Bacteroidota:Firmicutes ratio with measures of cognitive function.

|                | DSST  |         | Stroop |         | RAVLT |         | Category fluency |         | Letter fluency |         | MOCA |         | PC (1st) |         |
|----------------|-------|---------|--------|---------|-------|---------|------------------|---------|----------------|---------|------|---------|----------|---------|
|                | beta  | p-value | beta   | p-value | beta  | p-value | beta             | p-value | beta           | p-value | beta | p-value | beta     | p-value |
| <b>Model 1</b> | 11.15 | 0.06    | 8.14   | 0.07    | 1.27  | 0.08    | 3.66             | 0.92    | 9.02           | 0.85    | 2.43 | 0.43    | 1.14     | 0.19    |
| <b>Model 2</b> | 10.65 | 0.13    | 8.08   | 0.10    | 1.22  | 0.16    | 3.56             | 0.79    | 8.80           | 0.61    | 2.27 | 0.77    | 1.05     | 0.41    |
| <b>Model 3</b> | 10.98 | 0.32    | 8.15   | 0.19    | 1.28  | 0.39    | 3.76             | 0.76    | 9.12           | 0.75    | 2.31 | 0.86    | 1.10     | 0.64    |
| <b>Model 4</b> | 11.00 | 0.33    | 8.16   | 0.19    | 1.28  | 0.40    | 3.76             | 0.74    | 9.13           | 0.73    | 2.31 | 0.87    | 1.10     | 0.66    |
| <b>Model 5</b> | 11.06 | 0.31    | 8.22   | 0.23    | 1.29  | 0.41    | 3.77             | 0.69    | 9.14           | 0.75    | 2.32 | 0.85    | 1.10     | 0.68    |

Multivariable-adjusted regression models adjusted for:

Model 1: sequencing batch, age, race, gender, study center

Model 2: Model 1, with education

Model 3: Model 2, with physical activity, diet score, medication use, and smoking

Model 4: Model 3 with BMI

Model 5: Model 4 with hypertension and diabetes

eFigure 1: Beta-diversity (PCoA) differences for each cognitive function assessment

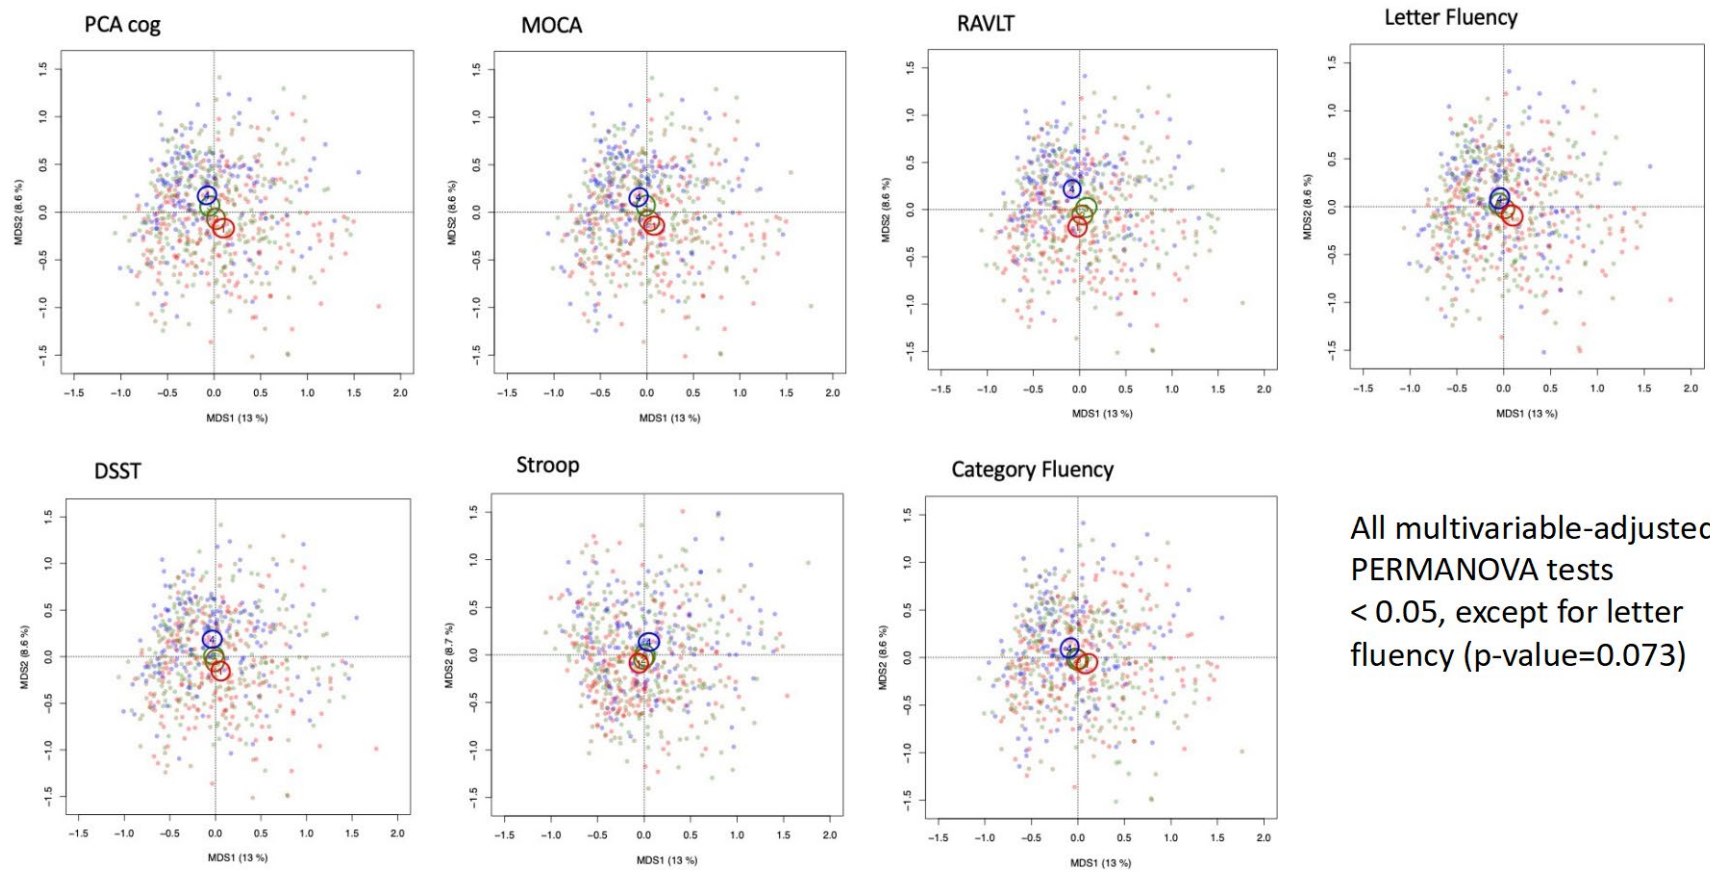

All multivariable-adjusted PERMANOVA tests < 0.05, except for letter fluency (p-value=0.073)

PCoA biplots of associations between cognition measures and microbial dissimilarity: CARDIA microbiome study. Biplots based on Bray Curtis dissimilarity matrix (non-Euclidean) for genera abundance in study participants with respect to quartiles (Q1: red; Q2: brown; Q3: green; and Q4: blue) of the first principal component (PC) of cognitive assessments (factor 1), MoCA, DSST, Stroop, RAVLT, letter fluency, and category fluency. Biplots shown for first two PCoA axes. Centroids illustrate the 95% CI for the mean location of each population subgroup. Permutational multivariate ANOVA (PERMANOVA) *P* values were less than 0.05 for all cognitive measures except letter fluency (p value = 0.073) in multivariable-adjusted analysis including: sequencing batch, age, race, sex, study center, education, smoking, physical activity, diet quality score, medication use, BMI, diabetes, and hypertension. MDS: multidimensional scaling.
